# Supplementary material for: Comparative Venomics of the Cryptic Cone Snail Species Virroconus ebraeus and Virroconus judaeus
Source: MDPI journal article supplement (doi:10.3390/md20020149), 2022-02-17
Supplement: s1 [file s1]

1. Notes

2. Result Statistics

Figure S1. False discovery rate (FDR) curve. X axis is the number of peptides being kept. Y axis is the corresponding FDR

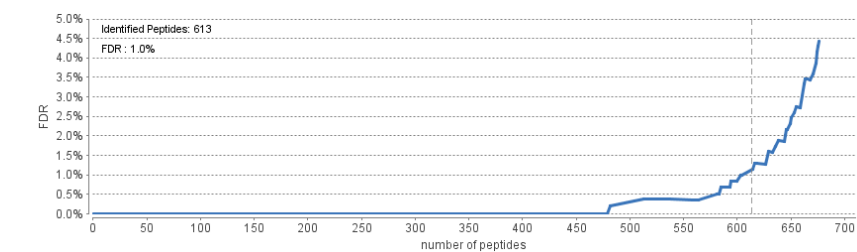

Figure S2. PSM score distribution. (a) Distribution of PEAKS peptide score; (b) Scatterplot of PEAKS peptide score versus precursor mass error.

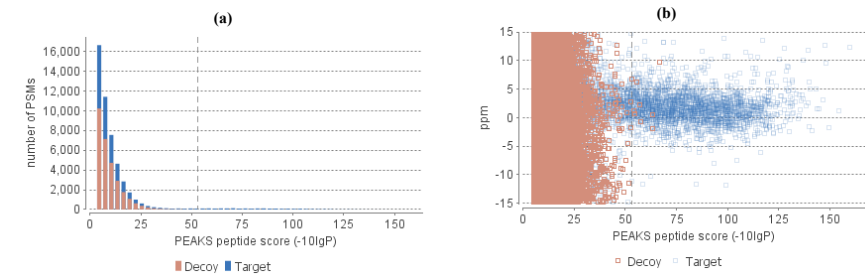

Table S1. Statistics of data.

|         | #Scans |        | #Features | Identified |        |             | #Peptides | #Sequences | #Proteins* |     |     |
|---------|--------|--------|-----------|------------|--------|-------------|-----------|------------|------------|-----|-----|
|         | MS1    | MS/MS  |           | #PSMs      | #Scans | #Features** |           |            | Groups     | All | Top |
| Total   | 0      | 134759 | 0         | 1973       | 1973   | 0           | 613       | 528        | 144        | 594 | 419 |
| ebraeus | 0      | 52068  | 0         | 754        | 754    | 0           | 342       | 308        | 106        | 389 | 300 |
| judaus  | 0      | 82691  | 0         | 1219       | 1219   | 0           | 458       | 390        | 101        | 441 | 287 |

\* proteins with significant peptides are used in counts.  
\*\* features are identified by DB search only.

Figure S3. Sample overlap for Proteins and Peptides (up to 8 samples). (a) All Proteins; (b) Top Proteins; (c) Peptides

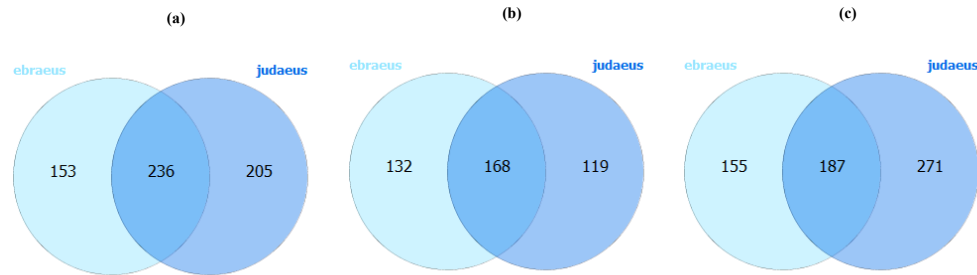

Figure S4. Distribution of peptide feature detection. (a) Feature m/z distribution; (b) Feature RT distribution.

(a) No available data for figure  
(b) No available data for figure

Figure S5. Distribution of identified peptide features. (a) Feature abundance distribution; (b) De novo sequencing validation

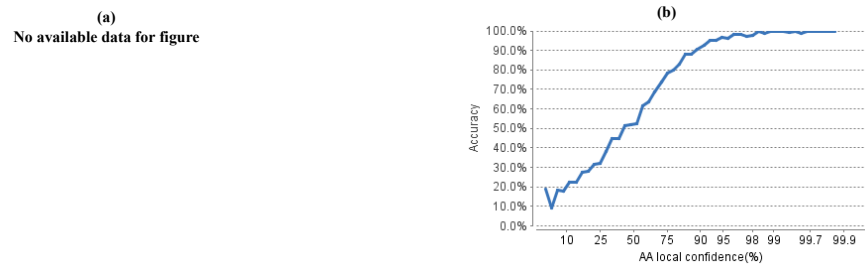

Table S2. Result filtration parameters.

|                          |       |
|--------------------------|-------|
| Peptide -10lgP           | ≥53.3 |
| PTM ion intensity        | ≥5%   |
| Protein Group FDR        | 1.0%  |
| Proteins unique peptides | ≥1    |
| De novo score(%)         | ≥80%  |

Table S3. Statistics of filtered result.

Table S4. PTM profile.

| Name            | ΔMass  | Position | #PSM | -10lgP | Abundance | AScore  |
|-----------------|--------|----------|------|--------|-----------|---------|
| Oxidation       | 15.99  | M        | 204  | 135.06 |           | 1000.00 |
| Carbamidomethyl | 57.02  | C        | 137  | 139.43 |           | 1000.00 |
| Pyro-glu from Q | -17.03 | N-term   | 55   | 112.62 |           | 1000.00 |
| Amidation       | -.98   | C-term   | 12   | 105.16 |           | 1000.00 |

|                                |      |                 |        |        |    |       |         |
|--------------------------------|------|-----------------|--------|--------|----|-------|---------|
| FDR (Peptide-Spectrum Matches) | 0.4% | Pyro-glu from E | -18.01 | N-term | 11 | 95.20 | 1000.00 |
| FDR (Peptide Sequences)        | 1.0% |                 |        |        |    |       |         |
| FDR (Protein Group)            | 1.4% |                 |        |        |    |       |         |
| De Novo Only Spectra           | 5791 |                 |        |        |    |       |         |

### 3. Experiment Control

**Figure S6.** Precursor mass error of peptide-spectrum matches (PSM) in filtered result. **(a)** Distribution of precursor mass error in ppm; **(b)** Scatterplot of precursor m/z versus precursor mass error in ppm.

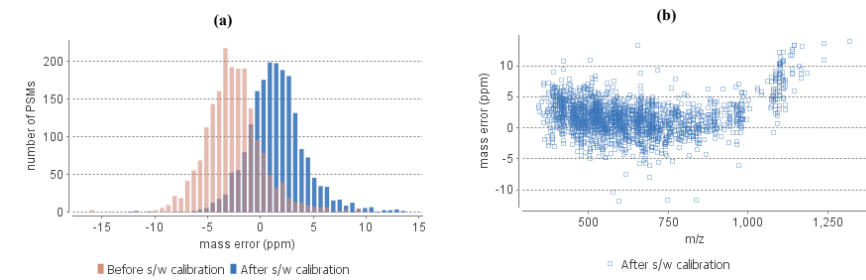

**Table S5.** Number of identified peptides in each sample by the number of missed cleavages.

|                  |     |    |   |   |    |
|------------------|-----|----|---|---|----|
| Missed Cleavages | 0   | 1  | 2 | 3 | 4+ |
| ebraeus          | 311 | 30 | 1 | 0 | 0  |
| judaeus          | 379 | 69 | 7 | 3 | 0  |

### 4. Other Information

|                                                                                                                                                                                                                                                                                                                                                                                                                                                                                                                                                                                                                                                                                                                                                                                                                                                                |                                                                                                                                                                                                                                                                                                |
|----------------------------------------------------------------------------------------------------------------------------------------------------------------------------------------------------------------------------------------------------------------------------------------------------------------------------------------------------------------------------------------------------------------------------------------------------------------------------------------------------------------------------------------------------------------------------------------------------------------------------------------------------------------------------------------------------------------------------------------------------------------------------------------------------------------------------------------------------------------|------------------------------------------------------------------------------------------------------------------------------------------------------------------------------------------------------------------------------------------------------------------------------------------------|
| <b>Table S6.</b> Search parameters.<br>PEAKS Version: PEAKS Studio 10.6 build 20201221<br>Search Engine Name: PEAKS<br>Parent Mass Error Tolerance: 15.0 ppm<br>Fragment Mass Error Tolerance: 0.5 Da<br>Precursor Mass Search Type: monoisotopic<br>Enzyme: Trypsin<br>Max Missed Cleavages: 3<br>Digest Mode: Specific<br>Fixed Modifications:<br>Carbamidomethylation: 57.02<br>Variable Modifications:<br>Amidation: -0.98<br>Oxidation (M): 15.99<br>Proline oxidation to pyroglutamic acid: 13.98<br>Pyro-glu from E: -18.01<br>Pyro-glu from Q: -17.03<br>Max Variable PTM Per Peptide: 3<br>Database: CTX-Jul21-final<br>Taxon: All<br>Searched Entry: 20085<br>FDR Estimation: Enabled<br>Merge Options: no merge<br>Precursor Options: corrected<br>Charge Options: no correction<br>Filter Charge: 2 - 8<br>Process: true<br>Associate chimera: yes | <b>Table S7.</b> Instrument parameters.<br>Fractions: 20210611-08_2021021-OK192A_815_5.3.236.mgf, 20210611-09_2021021-OK160A_816_5.3.236.mgf<br>Ion Source: ESI(nano-spray)<br>Fragmentation Mode: CID, CAD(y and b ions)<br>MS Scan Mode: FT-ICR/Orbitrap<br>MS/MS Scan Mode: Linear Ion Trap |
|----------------------------------------------------------------------------------------------------------------------------------------------------------------------------------------------------------------------------------------------------------------------------------------------------------------------------------------------------------------------------------------------------------------------------------------------------------------------------------------------------------------------------------------------------------------------------------------------------------------------------------------------------------------------------------------------------------------------------------------------------------------------------------------------------------------------------------------------------------------|------------------------------------------------------------------------------------------------------------------------------------------------------------------------------------------------------------------------------------------------------------------------------------------------|

#### Protein List

Protein Accession Contains:  
Protein Description Contains:  
Protein Sample Area >=  
Protein PTM Contains:

| Protein Group | Protein ID | Accession                     | -10lgP | Coverage (%) | Coverage (%) ebraeus | Coverage (%) judaeus | Area ebraeus | Area judaeus | #Peptides | #Unique | #Spec ebraeus | #Spec judaeus | PTM | Avg. Mass | Description                   |
|---------------|------------|-------------------------------|--------|--------------|----------------------|----------------------|--------------|--------------|-----------|---------|---------------|---------------|-----|-----------|-------------------------------|
| 10            | 179579     | OK193_E_272_PDI               | 464.87 | 63           | 60                   | 50                   | 0            |              | 32        | 3       | 67            | 112           | Y   | 56649     | OK193_E_272_PDI               |
| 10            | 179580     | SRX1323887_E_247_PDI          | 464.87 | 63           | 60                   | 50                   | 0            |              | 32        | 3       | 67            | 112           | Y   | 56649     | SRX1323887_E_247_PDI          |
| 10            | 179581     | OK006_E_295_PDI               | 464.87 | 63           | 60                   | 50                   | 0            |              | 32        | 3       | 67            | 112           | Y   | 56649     | OK006_E_295_PDI               |
| 10            | 179582     | OK213_E_326_PDI               | 464.87 | 63           | 60                   | 50                   | 0            |              | 32        | 3       | 67            | 112           | Y   | 56649     | OK213_E_326_PDI               |
| 10            | 179583     | CebrOK016_E_159_PDI           | 464.87 | 63           | 60                   | 50                   | 0            |              | 32        | 3       | 67            | 112           | Y   | 56649     | CebrOK016_E_159_PDI           |
| 10            | 179584     | CebrOK014_E_145_PDI           | 464.87 | 63           | 60                   | 50                   | 0            |              | 32        | 3       | 67            | 112           | Y   | 56649     | CebrOK014_E_145_PDI           |
| 38            | 179572     | V_1278_121_Protein            | 420.52 | 57           | 55                   | 35                   | 0            |              | 28        | 1       | 58            | 71            | Y   | 56331     | Disulfide Isomerase (PDI-A2)  |
| 38            | 179573     | V_1302_228_Protein            | 420.52 | 57           | 55                   | 35                   | 0            |              | 28        | 1       | 58            | 71            | Y   | 56331     | Disulfide Isomerase (PDI-A2)  |
| 38            | 179574     | V_1258_220_Protein            | 420.52 | 57           | 55                   | 35                   | 0            |              | 28        | 1       | 58            | 71            | Y   | 56331     | Disulfide Isomerase (PDI-A2)  |
| 38            | 179575     | V_CG13_261_Protein            | 420.52 | 57           | 55                   | 35                   | 0            |              | 28        | 1       | 58            | 71            | Y   | 56331     | Disulfide Isomerase (PDI-A2)  |
| 73            | 179696     | P_145_Actin                   | 412.38 | 42           | 36                   | 39                   | 0            | 0            | 15        | 15      | 49            | 53            | Y   | 54744     | P_145_Actin                   |
| 96            | 179739     | OK212_J_286_Conoporphin       | 405.70 | 54           | 5                    | 54                   | 0            | 0            | 12        | 2       | 4             | 62            | Y   | 27240     | OK212_J_286_Conoporphin       |
| 94            | 179736     | CebrOK033_J_240_Conoporphin   | 400.36 | 52           | 5                    | 52                   | 0            | 0            | 12        | 2       | 4             | 64            | Y   | 27319     | CebrOK033_J_240_Conoporphin   |
| 98            | 179734     | OK213_E_299_Conoporphin       | 367.15 | 54           | 54                   | 12                   | 0            | 0            | 13        | 11      | 55            | 8             | Y   | 27163     | OK213_E_299_Conoporphin       |
| 98            | 179735     | OK193_E_246_Conoporphin       | 367.15 | 54           | 54                   | 12                   | 0            | 0            | 13        | 11      | 55            | 8             | Y   | 27163     | OK193_E_246_Conoporphin       |
| 103           | 179699     | CebrOK035_J_368_PDI           | 335.41 | 32           | 10                   | 32                   | 0            | 0            | 16        | 5       | 11            | 33            | Y   | 58117     | CebrOK035_J_368_PDI           |
| 103           | 179700     | OK212_J_325_PDI               | 335.41 | 32           | 10                   | 32                   | 0            | 0            | 16        | 5       | 11            | 33            | Y   | 58117     | OK212_J_325_PDI               |
| 107           | 179809     | CebrOK035_J_344_Conoporphin   | 333.95 | 36           | 0                    | 36                   | 0            | 0            | 7         | 1       | 0             | 34            | Y   | 26968     | CebrOK035_J_344_Conoporphin   |
| 132           | 179708     | P_033D_033_Arginine           | 331.28 | 23           | 1                    | 23                   | 0            | 0            | 14        | 14      | 2             | 17            | N   | 79345     | kinase                        |
| 112           | 179834     | CebrOK035_J_343_Prohormone-4a | 305.11 | 22           | 11                   | 22                   | 0            | 0            | 7         | 4       | 7             | 22            | N   | 38910     | CebrOK035_J_343_Prohormone-4a |
| 112           | 179835     | OK214_J_305_Prohormone-4a     | 305.11 | 20           | 10                   | 20                   | 0            | 0            | 7         | 4       | 7             | 22            | N   | 42816     | OK214_J_305_Prohormone-4a     |
| 112           | 179836     | OK212_J_281_Prohormone-4a     | 305.11 | 20           | 10                   | 20                   | 0            | 0            | 7         | 4       | 7             | 22            | N   | 42829     | OK212_J_281_Prohormone-4a     |
| 112           | 179837     | OK212_J_284_Prohormone-4a     | 305.11 | 19           | 10                   | 19                   | 0            | 0            | 7         | 4       | 7             | 22            | N   | 44814     | OK212_J_284_Prohormone-4a     |
| 112           | 179838     | OK212_J_282_Prohormone-4a     | 305.11 | 18           | 9                    | 18                   | 0            | 0            | 7         | 4       | 7             | 22            | N   | 46869     | OK212_J_282_Prohormone-4a     |
| 112           | 179839     | CebrOK035_J_340_Prohormone-4a | 305.11 | 18           | 9                    | 18                   | 0            | 0            | 7         | 4       | 7             | 22            | N   | 48222     | CebrOK035_J_340_Prohormone-4a |
| 112           | 179840     | OK212_J_283_Prohormone-4a     | 305.11 | 17           | 9                    | 17                   | 0            | 0            | 7         | 4       | 7             | 22            | N   | 48873     | OK212_J_283_Prohormone-4a     |
| 112           | 179841     | CebrOK033_J_239_Prohormone-4a | 305.11 | 17           | 9                    | 17                   | 0            | 0            | 7         | 4       | 7             | 22            | N   | 48914     | CebrOK033_J_239_Prohormone-4a |
| 112           | 179842     | OK214_J_306_Prohormone-4a     | 305.11 | 17           | 8                    | 17                   | 0            | 0            | 7         | 4       | 7             | 22            | N   | 50917     | OK214_J_306_Prohormone-4a     |
| 112           | 179843     | OK005_J_296_Prohormone-4a     | 305.11 | 17           | 8                    | 17                   | 0            | 0            | 7         | 4       | 7             | 22            | N   | 50930     | OK005_J_296_Prohormone-4a     |
| 112           | 179844     | CebrOK035_J_339_Prohormone-4a | 305.11 | 17           | 8                    | 17                   | 0            | 0            | 7         | 4       | 7             | 22            | N   | 50912     | CebrOK035_J_339_Prohormone-4a |

total 419 proteins

| Protein Group | Protein ID | Accession                     | -10lgP | Coverage (%) | Coverage (%) ebraeus | Coverage (%) judaeus | Area ebraeus | Area judaeus | #Peptides | #Unique | #Spec ebraeus | #Spec judaeus | PTM | Avg. Mass | Description                             |
|---------------|------------|-------------------------------|--------|--------------|----------------------|----------------------|--------------|--------------|-----------|---------|---------------|---------------|-----|-----------|-----------------------------------------|
| 112           | 179845     | CebrOK035_J_341_Prohormone-4a | 305.11 | 16           | 8                    | 16                   |              | 0            | 7         | 4       | 7             | 22            | N   | 54694     | CebrOK035_J_341_Prohormone-4a           |
| 112           | 179846     | CebrOK035_J_342_Prohormone-4a | 305.11 | 15           | 8                    | 15                   |              | 0            | 7         | 4       | 7             | 22            | N   | 54945     | CebrOK035_J_342_Prohormone-4a           |
| 122           | 179811     | P_109D_104_Gelsolin-like      | 302.25 | 24           | 11                   | 24                   | 0            | 0            | 7         | 7       | 4             | 20            | Y   | 36438     | P_109D_104_Gelsolin-like                |
| 110           | 179741     | gene:107296774                | 300.43 | 14           | 11                   | 14                   | 0            | 0            | 9         | 9       | 14            | 16            | Y   | 72155     | transcript:XP015681610.1 DBNLI NE 14034 |
| 118           | 179758     | CebrOK033_J_270_PDI           | 299.60 | 25           | 10                   | 25                   |              | 0            | 8         | 1       | 8             | 18            | N   | 47799     | CebrOK033_J_270_PDI                     |
| 118           | 179759     | OK214_J_340_PDI               | 299.60 | 25           | 10                   | 25                   |              | 0            | 8         | 1       | 8             | 18            | N   | 47799     | OK214_J_340_PDI                         |
| 118           | 179756     | OK005_J_322_PDI               | 299.60 | 25           | 10                   | 25                   |              | 0            | 8         | 1       | 8             | 18            | N   | 47773     | OK005_J_322_PDI                         |
| 118           | 179757     | OK212_J_328_PDI               | 299.60 | 25           | 10                   | 25                   |              | 0            | 8         | 1       | 8             | 18            | N   | 47822     | OK212_J_328_PDI                         |
| 118           | 179762     | OK214_J_341_PDI               | 299.60 | 25           | 10                   | 25                   |              | 0            | 8         | 1       | 8             | 18            | N   | 47773     | OK214_J_341_PDI                         |
| 123           | 179760     | OK006_E_298_PDI               | 297.69 | 25           | 12                   | 23                   | 0            |              | 8         | 1       | 9             | 14            | N   | 47800     | OK006_E_298_PDI                         |
| 123           | 179761     | OK193_E_275_PDI               | 297.69 | 25           | 12                   | 23                   | 0            |              | 8         | 1       | 9             | 14            | N   | 47800     | OK193_E_275_PDI                         |
| 123           | 179763     | SRX1323887_E_251_PDI          | 297.69 | 25           | 12                   | 23                   | 0            |              | 8         | 1       | 9             | 14            | N   | 47814     | SRX1323887_E_251_PDI                    |
| 108           | 245416     | CV8_286_Protein               | 288.64 | 21           | 10                   | 19                   | 0            |              | 10        | 1       | 12            | 19            | N   | 57800     | Disulfide Isomerase                     |
| 108           | 179714     | V_CG13_228_Protein            | 288.64 | 21           | 10                   | 19                   | 0            |              | 10        | 1       | 12            | 19            | N   | 57929     | Disulfide Isomerase (PDI-A3)            |
| 108           | 179715     | A_1387_037                    | 288.64 | 21           | 11                   | 19                   | 0            |              | 10        | 1       | 12            | 19            | N   | 56522     | Protein Disulfide Isomerase (PDI-A3)    |
| 108           | 179716     | A_0025_374_Protein            | 288.64 | 22           | 11                   | 19                   | 0            |              | 10        | 1       | 12            | 19            | N   | 56025     | Disulfide Isomerase (PDI-A3)            |
| 108           | 179720     | A_0885_194_Protein            | 288.64 | 21           | 10                   | 19                   | 0            |              | 10        | 1       | 12            | 19            | N   | 57808     | Disulfide Isomerase (PDI-A3)            |
| 108           | 179717     | A_0855_188_Protein            | 288.64 | 21           | 10                   | 19                   | 0            |              | 10        | 1       | 12            | 19            | N   | 57698     | Disulfide Isomerase (PDI-A3)            |
| 108           | 179719     | A_0048_031_Protein            | 288.64 | 21           | 10                   | 19                   | 0            |              | 10        | 1       | 12            | 19            | N   | 57810     | Disulfide Isomerase (PDI-A3)            |
| 135           | 179812     | D_070_Calreticulin-like       | 284.54 | 22           | 2                    | 22                   | 0            | 0            | 8         | 8       | 1             | 17            | N   | 47502     | D_070_Calreticulin-like                 |
| 131           | 179747     | OK212_J_296_Ferritin          | 283.95 | 58           | 23                   | 58                   | 0            | 0            | 7         | 3       | 5             | 15            | N   | 19702     | OK212_J_296_Ferritin                    |
| 131           | 179748     | CebrOK033_J_246_Ferritin      | 283.95 | 58           | 23                   | 58                   | 0            | 0            | 7         | 3       | 5             | 15            | N   | 19675     | CebrOK033_J_246_Ferritin                |
| 131           | 179749     | OK214_J_315_Ferritin          | 283.95 | 58           | 23                   | 58                   | 0            | 0            | 7         | 3       | 5             | 15            | N   | 19675     | OK214_J_315_Ferritin                    |
| 131           | 179750     | OK005_J_302_Ferritin          | 283.95 | 58           | 23                   | 58                   | 0            | 0            | 7         | 3       | 5             | 15            | N   | 19702     | OK005_J_302_Ferritin                    |
| 131           | 179765     | CebrOK035_J_351_Ferritin      | 283.95 | 58           | 23                   | 58                   | 0            | 0            | 7         | 3       | 5             | 15            | N   | 19689     | CebrOK035_J_351_Ferritin                |
| 131           | 179766     | SRX1323887_E_233_Ferritin     | 283.95 | 58           | 23                   | 58                   | 0            | 0            | 7         | 3       | 5             | 15            | N   | 19689     | SRX1323887_E_233_Ferritin               |
| 131           | 179767     | OK006_E_274_Ferritin          | 283.95 | 58           | 23                   | 58                   | 0            | 0            | 7         | 3       | 5             | 15            | N   | 19689     | OK006_E_274_Ferritin                    |
| 131           | 179768     | OK193_E_251_Ferritin          | 283.95 | 58           | 23                   | 58                   | 0            | 0            | 7         | 3       | 5             | 15            | N   | 19689     | OK193_E_251_Ferritin                    |
| 131           | 179799     | OK213_E_305_Ferritin          | 283.95 | 58           | 23                   | 58                   | 0            | 0            | 7         | 3       | 5             | 15            | N   | 19675     | OK213_E_305_Ferritin                    |
| 131           | 179800     | CebrOK014_E_138_Ferritin      | 283.95 | 58           | 23                   | 58                   | 0            | 0            | 7         | 3       | 5             | 15            | N   | 19675     | CebrOK014_E_138_Ferritin                |
| 136           | 179832     | D_041_Thioredoxin             | 282.56 | 33           | 23                   | 33                   |              |              | 6         | 1       | 5             | 13            | Y   | 22326     | peroxidase 2                            |
| 102           | 179896     | D_085_FK506-binding           | 279.94 | 19           | 19                   | 19                   | 0            | 0            | 8         | 8       | 15            | 32            | Y   | 30452     | protein 2-like                          |
| 130           | 179764     | P_002D_003_Thioredoxin-like   | 277.08 | 14           | 1                    | 14                   | 0            | 0            | 7         | 7       | 2             | 18            | Y   | 67946     | P_002D_003_Thioredoxin-like             |
| 117           | 179732     | K_0010_152_Protein            | 275.19 | 17           | 8                    | 17                   |              | 0            | 8         | 1       | 9             | 17            | N   | 57456     | Disulfide Isomerase (PDI-A3)            |
| 121           | 179871     | CebrOK035_J_332_Tpra06        | 270.66 | 48           | 0                    | 48                   |              | 0            | 5         | 5       | 0             | 24            | Y   | 15017     | CebrOK035_J_332_Tpra06                  |
| 121           | 179879     | OK212_J_274_Tpra06            | 270.66 | 48           | 0                    | 48                   |              | 0            | 5         | 5       | 0             | 24            | Y   | 15043     | OK212_J_274_Tpra06                      |
| 121           | 179880     | CebrOK033_J_231_Tpra06        | 270.66 | 48           | 0                    | 48                   |              | 0            | 5         | 5       | 0             | 24            | Y   | 15043     | CebrOK033_J_231_Tpra06                  |
| 149           | 179786     | CebrOK016_E_148_Ferritin      | 260.29 | 48           | 6                    | 48                   |              | 0            | 8         | 6       | 1             | 9             | Y   | 19836     | CebrOK016_E_148_Ferritin                |
| 149           | 179787     | OK213_E_304_Ferritin          | 260.29 | 48           | 6                    | 48                   |              | 0            | 8         | 6       | 1             | 9             | Y   | 19836     | OK213_E_304_Ferritin                    |
| 149           | 179788     | OK006_E_273_Ferritin          | 260.29 | 48           | 6                    | 48                   |              | 0            | 8         | 6       | 1             | 9             | Y   | 19836     | OK006_E_273_Ferritin                    |
| 149           | 179789     | OK005_J_301_Ferritin          | 260.29 | 48           | 6                    | 48                   |              | 0            | 8         | 6       | 1             | 9             | Y   | 19836     | OK005_J_301_Ferritin                    |
| 149           | 179790     | OK212_J_294_Ferritin          | 260.29 | 48           | 6                    | 48                   |              | 0            | 8         | 6       | 1             | 9             | Y   | 19836     | OK212_J_294_Ferritin                    |
| 149           | 179791     | OK193_E_250_Ferritin          | 260.29 | 48           | 6                    | 48                   |              | 0            | 8         | 6       | 1             | 9             | Y   | 19836     | OK193_E_250_Ferritin                    |
| 149           | 179792     | K_0010_064_Ferritin           | 260.29 | 48           | 6                    | 48                   |              | 0            | 8         | 6       | 1             | 9             | Y   | 19836     | K_0010_064_Ferritin                     |
| 149           | 179793     | CebrOK014_E_137_Ferritin      | 260.29 | 48           | 6                    | 48                   |              | 0            | 8         | 6       | 1             | 9             | Y   | 19836     | CebrOK014_E_137_Ferritin                |
| 149           | 179794     | SRX1323887_E_232_Ferritin     | 260.29 | 48           | 6                    | 48                   |              | 0            | 8         | 6       | 1             | 9             | Y   | 19836     | SRX1323887_E_232_Ferritin               |
| 149           | 179795     | OK214_J_314_Ferritin          | 260.29 | 48           | 6                    | 48                   |              | 0            | 8         | 6       | 1             | 9             | Y   | 19836     | OK214_J_314_Ferritin                    |
| 149           | 179796     | CebrOK035_J_350_Ferritin      | 260.29 | 48           | 6                    | 48                   |              | 0            | 8         | 6       | 1             | 9             | Y   | 19836     | CebrOK035_J_350_Ferritin                |
| 149           | 179797     | CebrOK033_J_243_Ferritin      | 260.29 | 48           | 6                    | 48                   |              | 0            | 8         | 6       | 1             | 9             | Y   | 19836     | CebrOK033_J_243_Ferritin                |
| 149           | 179801     | OK212_J_295_Ferritin          | 260.29 | 48           | 6                    | 48                   |              | 0            | 8         | 6       | 1             | 9             | Y   | 19870     | OK212_J_295_Ferritin                    |
| 149           | 179802     | V_1278_120_Ferritin           | 260.29 | 48           | 6                    | 48                   |              | 0            | 8         | 6       | 1             | 9             | Y   | 19820     | V_1278_120_Ferritin                     |
| 149           | 179803     | V_1302_266_Ferritin           | 260.29 | 48           | 6                    | 48                   |              | 0            | 8         | 6       | 1             | 9             | Y   | 19820     | V_1302_266_Ferritin                     |
| 149           | 179804     | V_1258_223_Ferritin           | 260.29 | 48           | 6                    | 48                   |              | 0            | 8         | 6       | 1             | 9             | Y   | 19820     | V_1258_223_Ferritin                     |
| 149           | 179805     | V_CG13_283_Ferritin           | 260.29 | 48           | 6                    | 48                   |              | 0            | 8         | 6       | 1             | 9             | Y   | 19820     | V_CG13_283_Ferritin                     |
| 93            | 179972     | OK212_J_014_B2                | 256.30 | 45           | 20                   | 45                   |              | 0            | 5         | 1       | 5             | 63            | Y   | 14832     | OK212_J_014_B2                          |
| 93            | 179973     | OK214_J_010_B2                | 256.30 | 45           | 20                   | 45                   |              | 0            | 5         | 1       | 5             | 63            | Y   | 14832     | OK214_J_010_B2                          |
| 93            | 179974     | OK005_J_013_B2                | 256.30 | 45           | 20                   | 45                   |              | 0            | 5         | 1       | 5             | 63            | Y   | 14832     | OK005_J_013_B2                          |
| 93            | 179975     | CebrOK035_J_018_B2            | 256.30 | 45           | 20                   | 45                   |              | 0            | 5         | 1       | 5             | 63            | Y   | 14832     | CebrOK035_J_018_B2                      |
| 93            | 179976     | CebrOK033_J_011_B2            | 256.30 | 45           | 20                   | 45                   |              | 0            | 5         | 1       | 5             | 63            | Y   | 14832     | CebrOK033_J_011_B2                      |
| 141           | 179744     | OK213_E_318_PPI               | 252.53 | 37           | 0                    | 37                   |              | 0            | 7         | 5       | 0             | 14            | N   | 23008     | OK213_E_318_PPI                         |
| 141           | 179745     | SRX1323887_E_240_PPI          | 252.53 | 37           | 0                    | 37                   |              | 0            | 7         | 5       | 0             | 14            | N   | 23063     | SRX1323887_E_240_PPI                    |
| 141           | 179746     | CebrOK033_J_257_PPI           | 252.53 | 41           | 0                    | 41                   |              | 0            | 7         | 5       | 0             | 14            | N   | 20894     | CebrOK033_J_257_PPI                     |
| 141           | 179751     | CebrOK033_J_256_PPI           | 252.53 | 37           | 0                    | 37                   |              | 0            | 7         | 5       | 0             | 14            | N   | 23077     | CebrOK033_J_256_PPI                     |
| 141           | 179752     | OK005_J_311_PPI               | 252.53 | 37           | 0                    | 37                   |              | 0            | 7         | 5       | 0             | 14            | N   | 23077     | OK005_J_311_PPI                         |
| 141           | 179753     | OK006_E_286_PPI               | 252.53 | 37           | 0                    | 37                   |              | 0            | 7         | 5       | 0             | 14            | N   | 23077     | OK006_E_286_PPI                         |
| 141           | 179754     | OK193_E_264_PPI               | 252.53 | 37           | 0                    | 37                   |              | 0            | 7         | 5       | 0             | 14            | N   | 23077     | OK193_E_264_PPI                         |
| 141           | 179755     | OK214_J_328_PPI               | 252.53 | 37           | 0                    | 37                   |              | 0            | 7         | 5       | 0             | 14            | N   | 23077     | OK214_J_328_PPI                         |
| 141           | 179774     | OK212_J_315_PPI               | 252.53 | 37           | 0                    | 37                   |              | 0            | 7         | 5       | 0             | 14            | N   | 23063     | OK212_J_315_PPI                         |
| 104           | 179740     | gene:107297086                | 248.77 | 30           | 30                   | 28                   | 0            | 0            | 8         | 8       | 23            | 22            | Y   | 27632     | transcript:XP015681930.1 DBNLI NE 14330 |
| 133           | 179848     | OK193_E_277_Thioredoxin-like  | 244.15 | 26           | 22                   | 26                   |              | 0            | 6         | 1       | 5             | 14            | Y   | 22827     | protein                                 |
| 114           | 179864     | gene:107292429                | 238.49 | 32           | 32                   | 32                   | 0            | 0            | 6         | 6       | 14            | 14            | Y   | 16854     | transcript:XP015677000.1 DBNLI NE 9931  |
| 116           | 179806     | P_096_Elongation              | 236.77 | 11           | 9                    | 11                   | 0            | 0            | 5         | 5       | 13            | 14            | N   | 50496     | factor                                  |
| 124           | 123        | Pvau2_100                     | 233.02 | 21           | 15                   | 21                   | 0            | 0            | 4         | 3       | 4             | 19            | Y   | 24456     | Pvau2_100                               |
| 101           | 179977     | OK213_E_018_B2                | 229.35 | 47           | 45                   | 22                   | 0            |              | 5         | 1       | 7             | 42            | Y   | 14399     | OK213_E_018_B2                          |
| 109           | 179932     | OK006_E_036_F                 | 224.91 | 69           | 69                   | 30                   | 0            | 0            | 4         | 4       | 30            | 1             | Y   | 7573      | OK006_E_036_F                           |
| 109           | 179933     | OK213_E_040_F                 | 224.91 | 69           | 69                   | 30                   | 0            | 0            | 4         | 4       | 30            | 1             | Y   | 7573      | OK213_E_040_F                           |
| 109           | 179934     | SRX1323887_E_036_F            | 224.91 | 69           | 69                   | 30                   | 0            | 0            | 4         | 4       | 30            | 1             | Y   | 7573      | SRX1323887_E_036_F                      |
| 109           | 179935     | CebrOK014_E_011_F             | 224.91 | 69           | 69                   | 30                   | 0            | 0            | 4         | 4       | 30            | 1             | Y   | 7573      | CebrOK014_E_011_F                       |
| 109           | 179936     | OK214_J_037_F                 | 224.91 | 69           | 69                   | 30                   | 0            | 0            | 4         | 4       | 30            | 1             | Y   | 7573      | OK214_J_037_F                           |
| 109           | 179937     | OK005_J_033_F                 | 224.91 | 69           | 69                   | 30                   | 0            | 0            | 4         | 4       | 30            | 1             | Y   | 7573      | OK005_J_033_F                           |
| 109           | 179938     | OK193_E_033_F                 | 224.91 | 69           | 69                   | 30                   | 0            | 0            | 4         | 4       | 30            | 1             | Y   | 7633      | OK193_E_033_F                           |
| 109           | 179939     | CebrOK016_E_013_F             | 224.91 | 69           | 69                   | 30                   | 0            | 0            | 4         | 4       | 30            | 1             | Y   | 7633      | CebrOK016_E_013_F                       |
| 109           | 179940     | OK213_E_041_F                 | 224.91 | 69           | 69                   | 30                   | 0            | 0            | 4         | 4       | 30            | 1             | Y   | 7633      | OK213_E_041_F                           |
| 109           | 179941     | CebrOK014_E_010_F             | 224.91 | 69           | 69                   | 30                   | 0            | 0            | 4         | 4       | 30            | 1             | Y   | 7633      | CebrOK014_E_010_F                       |
| 109           | 179942     | SRX1323887_E_035_F            | 224.91 | 69           | 69                   | 30                   | 0            | 0            | 4         | 4       | 30            | 1             | Y   | 7633      | SRX1323887_E_035_F                      |
| 145           | 179830     | gene:107300483                | 224.02 | 28           | 11                   | 28                   | 0            | 0            | 5         | 5       | 2             | 9             | N   | 22752     | transcript:XP015685299.1 DBNLI NE 17459 |
| 138           | 179849     | OK214_J_343_CAP               | 223.90 | 26           | 6                    | 26                   | 0            | 0            | 4         | 4       | 2             | 15            | N   | 21613     | OK214_J_343_CAP                         |
| 138           | 179856     | CebrOK033_J_271_CAP           | 223.90 | 26           | 6                    | 26                   | 0            |              |           |         |               |               |     |           |                                         |

| Protein Group | Protein ID | Accession                         | -10lgP | Coverage (%) | Coverage (%) ebraeus | Coverage (%) judaeus | Area ebraeus | Area judaeus | #Peptides | #Unique | #Spec ebraeus | #Spec judaeus | PTM | Avg. Mass | Description                             |
|---------------|------------|-----------------------------------|--------|--------------|----------------------|----------------------|--------------|--------------|-----------|---------|---------------|---------------|-----|-----------|-----------------------------------------|
| 126           | 179958     | OK213_E_279_Tpra06                | 203.65 | 29           | 29                   | 0                    | 0            | 0            | 4         | 4       | 22            | 0             | Y   | 14906     | OK213_E_279_Tpra06                      |
| 126           | 179955     | OK006_E_261_Tpra06                | 203.65 | 29           | 29                   | 0                    | 0            | 0            | 4         | 4       | 22            | 0             | Y   | 14875     | OK006_E_261_Tpra06                      |
| 126           | 179964     | OK006_E_262_Tpra06                | 203.65 | 29           | 29                   | 0                    | 0            | 0            | 4         | 4       | 22            | 0             | Y   | 14873     | OK006_E_262_Tpra06                      |
| 144           | 179903     | V_1278_106_Prohormone-4a          | 202.79 | 14           | 14                   | 2                    | 0            | 0            | 4         | 1       | 8             | 4             | Y   | 42200     | V_1278_106_Prohormone-4a                |
| 144           | 179904     | V_CG13_205_Prohormone-4a          | 202.79 | 14           | 14                   | 2                    | 0            | 0            | 4         | 1       | 8             | 4             | Y   | 42199     | V_CG13_205_Prohormone-4a                |
| 165           | 179828     | P_094D_091_Angiotensin-converting | 202.24 | 6            | 4                    | 4                    | 0            | 0            | 4         | 4       | 3             | 3             | N   | 81827     | enzyme-like                             |
| 140           | 179769     | P_102D_097_Nucleobinding-2-like   | 199.47 | 13           | 11                   | 7                    | 0            | 0            | 6         | 6       | 5             | 9             | N   | 48472     | P_102D_097_Nucleobinding-2-like         |
| 137           | 179981     | OK212_J_009_B1                    | 197.15 | 51           | 11                   | 51                   | 0            | 0            | 3         | 1       | 2             | 16            | N   | 8340      | OK212_J_009_B1                          |
| 137           | 179982     | OK005_J_007_B1                    | 197.15 | 51           | 11                   | 51                   | 0            | 0            | 3         | 1       | 2             | 16            | N   | 8340      | OK005_J_007_B1                          |
| 137           | 180002     | OK212_J_010_B1                    | 197.15 | 41           | 9                    | 41                   | 0            | 0            | 3         | 1       | 2             | 16            | N   | 10340     | OK212_J_010_B1                          |
| 137           | 179999     | OK212_J_008_B1                    | 197.15 | 53           | 11                   | 53                   | 0            | 0            | 3         | 1       | 2             | 16            | N   | 7953      | OK212_J_008_B1                          |
| 137           | 180000     | OK005_J_006_B1                    | 197.15 | 53           | 11                   | 53                   | 0            | 0            | 3         | 1       | 2             | 16            | N   | 7953      | OK005_J_006_B1                          |
| 120           | 182188     | OK212_J_220_Cerm03                | 196.20 | 53           | 41                   | 53                   | 0            | 0            | 2         | 1       | 2             | 23            | N   | 3523      | OK212_J_220_Cerm03                      |
| 134           | 179983     | OK214_J_005_B1                    | 195.80 | 51           | 11                   | 51                   | 0            | 0            | 3         | 1       | 2             | 17            | N   | 8354      | OK214_J_005_B1                          |
| 134           | 180001     | OK214_J_004_B1                    | 195.80 | 53           | 11                   | 53                   | 0            | 0            | 3         | 1       | 2             | 17            | N   | 7967      | OK214_J_004_B1                          |
| 128           | 179965     | V_1278_048_E-1                    | 190.86 | 44           | 44                   | 30                   | 0            | 0            | 4         | 4       | 15            | 6             | Y   | 8480      | V_1278_048_E-1                          |
| 128           | 179966     | V_CG13_066_E-1                    | 190.86 | 44           | 44                   | 30                   | 0            | 0            | 4         | 4       | 15            | 6             | Y   | 8480      | V_CG13_066_E-1                          |
| 139           | 180539     | SRX1323887_E_199_Pmag02           | 189.56 | 32           | 14                   | 18                   | 0            | 0            | 3         | 2       | 7             | 9             | Y   | 8081      | SRX1323887_E_199_Pmag02                 |
| 139           | 180540     | SRX1323887_E_200_Pmag02           | 189.56 | 32           | 14                   | 18                   | 0            | 0            | 3         | 2       | 7             | 9             | Y   | 8081      | SRX1323887_E_200_Pmag02                 |
| 127           | 180454     | OK212_J_265_Pmag02                | 187.94 | 32           | 18                   | 32                   | 0            | 0            | 3         | 1       | 9             | 13            | Y   | 8090      | OK212_J_265_Pmag02                      |
| 127           | 180915     | CebrOK035_J_309_Pmag02            | 187.94 | 32           | 18                   | 32                   | 0            | 0            | 3         | 1       | 9             | 13            | Y   | 8123      | CebrOK035_J_309_Pmag02                  |
| 127           | 181080     | CebrOK035_J_308_Pmag02            | 187.94 | 32           | 18                   | 32                   | 0            | 0            | 3         | 1       | 9             | 13            | Y   | 8091      | CebrOK035_J_308_Pmag02                  |
| 127           | 181081     | CebrOK033_J_219_Pmag02            | 187.94 | 32           | 18                   | 32                   | 0            | 0            | 3         | 1       | 9             | 13            | Y   | 8091      | CebrOK033_J_219_Pmag02                  |
| 127           | 181082     | OK214_J_271_Pmag02                | 187.94 | 32           | 18                   | 32                   | 0            | 0            | 3         | 1       | 9             | 13            | Y   | 8091      | OK214_J_271_Pmag02                      |
| 127           | 181083     | OK005_J_275_Pmag02                | 187.94 | 32           | 18                   | 32                   | 0            | 0            | 3         | 1       | 9             | 13            | Y   | 8116      | OK005_J_275_Pmag02                      |
| 127           | 181084     | OK212_J_264_Pmag02                | 187.94 | 32           | 18                   | 32                   | 0            | 0            | 3         | 1       | 9             | 13            | Y   | 8091      | OK212_J_264_Pmag02                      |
| 127           | 181085     | OK214_J_272_Pmag02                | 187.94 | 32           | 18                   | 32                   | 0            | 0            | 3         | 1       | 9             | 13            | Y   | 8130      | OK214_J_272_Pmag02                      |
| 105           | 179930     | gene:107299479                    | 185.85 | 23           | 23                   | 23                   | 0            | 0            | 4         | 4       | 22            | 13            | N   | 20702     | transcript:XP015684320.1 DBNLI NE 16549 |
| 176           | 179994     | SRX1323887_E_190_Ggeo01           | 184.26 | 61           | 61                   | 0                    | 0            | 0            | 3         | 1       | 5             | 0             | N   | 7219      | SRX1323887_E_190_Ggeo01                 |
| 176           | 179995     | CebrOK014_E_119_Ggeo01            | 184.26 | 61           | 61                   | 0                    | 0            | 0            | 3         | 1       | 5             | 0             | N   | 7193      | CebrOK014_E_119_Ggeo01                  |
| 176           | 179996     | OK005_J_264_Ggeo01                | 184.26 | 61           | 61                   | 0                    | 0            | 0            | 3         | 1       | 5             | 0             | N   | 7161      | OK005_J_264_Ggeo01                      |
| 176           | 179997     | OK213_E_251_Ggeo01                | 184.26 | 61           | 61                   | 0                    | 0            | 0            | 3         | 1       | 5             | 0             | N   | 7161      | OK213_E_251_Ggeo01                      |
| 159           | 180503     | P_022_Coagulation                 | 184.02 | 15           | 15                   | 8                    | 0            | 0            | 3         | 3       | 6             | 2             | Y   | 23382     | factor                                  |
| 162           | 179929     | D_059_Immunoglobulin-like         | 183.37 | 9            | 2                    | 9                    | 0            | 0            | 3         | 3       | 3             | 4             | Y   | 41965     | domain                                  |
| 169           | 179915     | OK214_J_329_PPI                   | 178.01 | 17           | 0                    | 17                   | 0            | 0            | 3         | 1       | 0             | 5             | N   | 23008     | OK214_J_329_PPI                         |
| 169           | 179916     | OK212_J_316_PPI                   | 178.01 | 17           | 0                    | 17                   | 0            | 0            | 3         | 1       | 0             | 5             | N   | 23008     | OK212_J_316_PPI                         |
| 201           | 179998     | SRX1323887_E_191_Ggeo01           | 174.73 | 54           | 0                    | 0                    | 0            | 0            | 3         | 1       | 3             | 0             | N   | 8172      | SRX1323887_E_191_Ggeo01                 |
| 212           | 180302     | OK193_E_234_Tand01                | 172.52 | 27           | 27                   | 0                    | 0            | 0            | 2         | 2       | 2             | 0             | N   | 12931     | OK193_E_234_Tand01                      |
| 212           | 180303     | OK213_E_278_Tand01                | 172.52 | 27           | 27                   | 0                    | 0            | 0            | 2         | 2       | 2             | 0             | N   | 12931     | OK213_E_278_Tand01                      |
| 212           | 180304     | OK006_E_260_Tand01                | 172.52 | 27           | 27                   | 0                    | 0            | 0            | 2         | 2       | 2             | 0             | N   | 12931     | OK006_E_260_Tand01                      |
| 212           | 180305     | SRX1323887_E_217_Tand01           | 172.52 | 27           | 27                   | 0                    | 0            | 0            | 2         | 2       | 2             | 0             | N   | 12931     | SRX1323887_E_217_Tand01                 |
| 143           | 179831     | P_079D_079_Metallopeptidase       | 172.45 | 6            | 2                    | 6                    | 0            | 0            | 4         | 4       | 1             | 11            | N   | 64734     | P_079D_079_Metallopeptidase             |
| 166           | 179833     | gene:107297064                    | 168.85 | 5            | 0                    | 5                    | 0            | 0            | 4         | 4       | 0             | 6             | N   | 91127     | transcript:XP015681908.1 DBNLI NE 14308 |
| 167           | 179914     | gene:107289560                    | 168.59 | 15           | 7                    | 15                   | 0            | 0            | 3         | 3       | 2             | 4             | N   | 29134     | transcript:XP015673826.1 DBNLI NE 7176  |
| 154           | 179921     | OK193_E_248_Conodipine            | 165.82 | 23           | 23                   | 0                    | 0            | 0            | 4         | 2       | 9             | 0             | Y   | 20340     | OK193_E_248_Conodipine                  |
| 154           | 179922     | SRX1323887_E_230_Conodipine       | 165.82 | 23           | 23                   | 0                    | 0            | 0            | 4         | 2       | 9             | 0             | Y   | 20344     | SRX1323887_E_230_Conodipine             |
| 154           | 179924     | OK213_E_301_Conodipine            | 165.82 | 23           | 23                   | 0                    | 0            | 0            | 4         | 2       | 9             | 0             | Y   | 20477     | OK213_E_301_Conodipine                  |
| 154           | 179925     | OK006_E_272_Conodipine            | 165.82 | 23           | 23                   | 0                    | 0            | 0            | 4         | 2       | 9             | 0             | Y   | 20477     | OK006_E_272_Conodipine                  |
| 148           | 180083     | V_1302_329_T-3-WF                 | 160.40 | 38           | 38                   | 38                   | 0            | 0            | 2         | 1       | 9             | 2             | Y   | 5742      | V_1302_329_T-3-WF                       |
| 148           | 181103     | V_1302_150_T-3-WF                 | 160.40 | 42           | 42                   | 42                   | 0            | 0            | 2         | 1       | 9             | 2             | Y   | 5242      | V_1302_150_T-3-WF                       |
| 148           | 181104     | V_1258_142_T-3-WF                 | 160.40 | 42           | 42                   | 42                   | 0            | 0            | 2         | 1       | 9             | 2             | Y   | 5242      | V_1258_142_T-3-WF                       |
| 148           | 181105     | V_1302_151_T-3-WF                 | 160.40 | 40           | 40                   | 40                   | 0            | 0            | 2         | 1       | 9             | 2             | Y   | 5727      | V_1302_151_T-3-WF                       |
| 148           | 181106     | V_1258_074_T-3-WF                 | 160.40 | 38           | 38                   | 38                   | 0            | 0            | 2         | 1       | 9             | 2             | Y   | 5924      | V_1258_074_T-3-WF                       |
| 168           | 179920     | gene:107292247                    | 156.53 | 3            | 0                    | 3                    | 0            | 0            | 3         | 3       | 0             | 5             | N   | 103037    | transcript:XP015676813.1 DBNLI NE 9754  |
| 184           | 180553     | OK212_J_239_Cerm08                | 152.79 | 29           | 0                    | 29                   | 0            | 0            | 2         | 2       | 0             | 4             | Y   | 10110     | OK212_J_239_Cerm08                      |
| 184           | 180554     | CebrOK033_J_197_Cerm08            | 152.79 | 29           | 0                    | 29                   | 0            | 0            | 2         | 2       | 0             | 4             | Y   | 10110     | CebrOK033_J_197_Cerm08                  |
| 177           | 179989     | gene:107285995                    | 152.00 | 25           | 8                    | 25                   | 0            | 0            | 3         | 3       | 2             | 3             | N   | 20697     | transcript:XP015669766.1 DBNLI NE 3721  |
| 150           | 181079     | V_CG13_085_B2                     | 150.40 | 40           | 40                   | 0                    | 0            | 0            | 2         | 2       | 10            | 0             | Y   | 15163     | V_CG13_085_B2                           |
| 155           | 182213     | OK214_J_237_Cerm03                | 149.89 | 55           | 0                    | 55                   | 0            | 0            | 4         | 4       | 0             | 9             | N   | 3355      | OK214_J_237_Cerm03                      |
| 190           | 180098     | OK212_J_300_Thioredoxin           | 148.61 | 8            | 0                    | 8                    | 0            | 0            | 2         | 2       | 0             | 3             | N   | 43581     | domain-containing protein 5             |
| 190           | 180099     | OK005_J_306_Thioredoxin           | 148.61 | 8            | 0                    | 8                    | 0            | 0            | 2         | 2       | 0             | 3             | N   | 43581     | domain-containing protein 5             |
| 181           | 179986     | SRX1323887_E_229_Conodipine       | 145.93 | 20           | 20                   | 0                    | 0            | 0            | 3         | 1       | 4             | 0             | Y   | 20361     | SRX1323887_E_229_Conodipine             |
| 181           | 179987     | OK193_E_247_Conodipine            | 145.93 | 20           | 20                   | 0                    | 0            | 0            | 3         | 1       | 4             | 0             | Y   | 20357     | OK193_E_247_Conodipine                  |
| 160           | 181116     | gene:107298953                    | 143.17 | 37           | 7                    | 37                   | 0            | 0            | 2         | 2       | 2             | 6             | N   | 10526     | transcript:XP015683796.1 DBNLI NE 16056 |
| 142           | 181101     | OK212_J_224_Cerm03                | 136.93 | 70           | 23                   | 70                   | 0            | 0            | 2         | 1       | 2             | 12            | N   | 3285      | OK212_J_224_Cerm03                      |
| 111           | 181087     | OK213_E_102_M                     | 136.34 | 58           | 58                   | 58                   | 0            | 0            | 2         | 2       | 18            | 12            | N   | 3551      | OK213_E_102_M                           |
| 191           | 180813     | V_CG13_016_Conkunitzin-12         | 134.58 | 16           | 16                   | 0                    | 0            | 0            | 2         | 2       | 3             | 0             | N   | 12555     | V_CG13_016_Conkunitzin-12               |
| 191           | 181052     | V_1302_039_Conkunitzin-12         | 134.58 | 16           | 16                   | 0                    | 0            | 0            | 2         | 2       | 3             | 0             | N   | 12597     | V_1302_039_Conkunitzin-12               |
| 147           | 180171     | OK213_E_009_B1                    | 133.77 | 32           | 32                   | 11                   | 0            | 0            | 2         | 1       | 6             | 5             | N   | 8454      | OK213_E_009_B1                          |
| 147           | 180145     | OK213_E_008_B1                    | 133.77 | 33           | 33                   | 11                   | 0            | 0            | 2         | 1       | 6             | 5             | N   | 8008      | OK213_E_008_B1                          |
| 147           | 180188     | SRX1323887_E_010_B1               | 133.77 | 33           | 33                   | 11                   | 0            | 0            | 2         | 1       | 6             | 5             | N   | 8011      | SRX1323887_E_010_B1                     |
| 147           | 180189     | OK193_E_008_B1                    | 133.77 | 33           | 33                   | 11                   | 0            | 0            | 2         | 1       | 6             | 5             | N   | 8011      | OK193_E_008_B1                          |
| 147           | 180190     | OK213_E_010_B1                    | 133.77 | 33           | 33                   | 11                   | 0            | 0            | 2         | 1       | 6             | 5             | N   | 8011      | OK213_E_010_B1                          |
| 147           | 180191     | CebrOK014_E_003_B1                | 133.77 | 33           | 33                   | 11                   | 0            | 0            | 2         | 1       | 6             | 5             | N   | 8011      | CebrOK014_E_003_B1                      |
| 151           | 181112     | OK193_E_026_Conkunitzin           | 128.50 | 30           | 30                   | 0                    | 0            | 0            | 2         | 2       | 10            | 0             | Y   | 6959      | OK193_E_026_Conkunitzin                 |
| 151           | 181113     | OK006_E_028_Conkunitzin           | 128.50 | 30           | 30                   | 0                    | 0            | 0            | 2         | 2       | 10            | 0             | Y   | 6959      | OK006_E_028_Conkunitzin                 |
| 151           | 181114     | SRX1323887_E_026_Conkunitzin      | 128.50 | 30           | 30                   | 0                    | 0            | 0            | 2         | 2       | 10            | 0             | Y   | 6959      | SRX1323887_E_026_Conkunitzin            |
| 151           | 181115     | OK213_E_030_Conkunitzin           | 128.50 | 30           | 30                   | 0                    | 0            | 0            | 2         | 2       | 10            | 0             | Y   | 6959      | OK213_E_030_Conkunitzin                 |
| 161           | 179913     | gene:107288180                    | 128.31 | 4            | 4                    | 4                    | 0            | 0            | 2         | 2       | 2             | 5             | N   | 54031     | transcript:XP015672252.1 DBNLI NE 5833  |
| 173           | 181530     | OK212_J_025_Conkunitzin           | 127.65 | 32           | 0                    | 32                   | 0            | 0            | 1         | 1       | 0             | 5             | Y   | 7081      | OK212_J_025_Conkunitzin                 |
| 173           | 181531     | OK212_J_026_Conkunitzin           | 127.65 | 32           | 0                    | 32                   | 0            | 0            | 1         | 1       | 0             | 5             | Y   | 7065      | OK212_J_026_Conkunitzin                 |
| 215           | 180086     | gene:107288688                    | 123.35 | 15           | 0                    | 15                   | 0            | 0            | 2         | 2       | 0             | 2             | Y   | 21782     | transcript:XP015672813.1 DBNLI NE 6321  |
| 183           | 218        | Pvau2_22                          | 112.72 | 5            | 0                    | 5                    | 0            | 0            | 2         | 2       | 0             | 4             | N   | 52333     | Pvau2_22                                |
| 179           | 180112     | gene:107294617                    | 111.81 | 2            | 2                    | 2                    | 0            | 0            | 1         | 1       | 2             | 2             | N   | 91720     | transcript:XP015679347.1 DBNLI NE 12030 |
| 180           | 180096     | P_027D_029_Neuroendocrine         | 111.72 | 2            | 0                    | 2                    | 0            | 0            | 1         | 1       | 0             | 4             | N   | 74870     | convertase                              |
| 249           | 182205     | OK193_E_214_Ggeo01                | 108.40 | 32           | 32                   | 0                    | 0            | 0            | 1         | 1       | 1             | 0             | N   | 4628      | OK                                      |

| Protein Group | Protein ID | Accession                                                  | -10lgP | Coverage (%) | Coverage (%) ebraeus | Coverage (%) judaeus | Area ebraeus | Area judaeus | #Peptides | #Unique | #Spec ebraeus | #Spec judaeus | PTM | Avg. Mass | Description                                                    |
|---------------|------------|------------------------------------------------------------|--------|--------------|----------------------|----------------------|--------------|--------------|-----------|---------|---------------|---------------|-----|-----------|----------------------------------------------------------------|
| 188           | 180019     | A_0031_033_60S                                             | 102.93 | 22           | 0                    | 22                   |              | 0            | 2         | 2       | 0             | 3             | N   | 12416     | ribosomal protein L10                                          |
| 188           | 180020     | A_0855_173_60S                                             | 102.93 | 22           | 0                    | 22                   |              | 0            | 2         | 2       | 0             | 3             | N   | 12416     | ribosomal protein L10                                          |
| 188           | 180021     | K_0010_065_60S                                             | 102.93 | 22           | 0                    | 22                   |              | 0            | 2         | 2       | 0             | 3             | N   | 12442     | ribosomal protein L10                                          |
| 188           | 180022     | A_0239_021_60S                                             | 102.93 | 22           | 0                    | 22                   |              | 0            | 2         | 2       | 0             | 3             | N   | 12416     | ribosomal protein L10                                          |
| 188           | 180023     | A_0875_147_60S                                             | 102.93 | 22           | 0                    | 22                   |              | 0            | 2         | 2       | 0             | 3             | N   | 12416     | ribosomal protein L10                                          |
| 188           | 180024     | A_0039_214_60S                                             | 102.93 | 22           | 0                    | 22                   |              | 0            | 2         | 2       | 0             | 3             | N   | 12416     | ribosomal protein L10                                          |
| 186           | 181095     | OK212_J_022_Con-ikot-ikot                                  | 102.53 | 22           | 0                    | 22                   |              | 0            | 2         | 2       | 0             | 4             | Y   | 10743     | OK212_J_022_Con-ikot-ikot                                      |
| 186           | 181096     | OK214_J_017_Con-ikot-ikot                                  | 102.53 | 22           | 0                    | 22                   |              | 0            | 2         | 2       | 0             | 4             | Y   | 10743     | OK214_J_017_Con-ikot-ikot                                      |
| 186           | 181097     | CebrOK035_J_031_Con-ikot-ikot                              | 102.53 | 22           | 0                    | 22                   |              | 0            | 2         | 2       | 0             | 4             | Y   | 10743     | CebrOK035_J_031_Con-ikot-ikot                                  |
| 186           | 181098     | OK214_J_018_Con-ikot-ikot                                  | 102.53 | 21           | 0                    | 21                   |              | 0            | 2         | 2       | 0             | 4             | Y   | 10848     | OK214_J_018_Con-ikot-ikot                                      |
| 199           | 182215     | V_1258_008_M-5-WF                                          | 102.49 | 27           | 27                   | 0                    | 0            |              | 2         | 2       | 3             | 0             | N   | 5707      | V_1258_008_M-5-WF                                              |
| 199           | 182216     | V_1302_055_M-5-WF                                          | 102.49 | 19           | 19                   | 0                    | 0            |              | 2         | 2       | 3             | 0             | N   | 7934      | V_1302_055_M-5-WF                                              |
| 262           | 182206     | SRX1323887_E_029_D                                         | 101.45 | 30           | 30                   | 0                    | 0            |              | 1         | 1       | 1             | 0             | Y   | 4789      | SRX1323887_E_029_D                                             |
| 262           | 182207     | OK213_E_034_D                                              | 101.45 | 30           | 30                   | 0                    | 0            |              | 1         | 1       | 1             | 0             | Y   | 4723      | OK213_E_034_D                                                  |
| 156           | 181120     | V_CG13_175_T-3-WF                                          | 99.73  | 33           | 33                   | 15                   | 0            |              | 2         | 1       | 8             | 1             | N   | 5152      | V_CG13_175_T-3-WF                                              |
| 202           | 181107     | OK006_E_057_I1                                             | 98.47  | 44           | 44                   | 0                    | 0            |              | 2         | 2       | 3             | 0             | Y   | 4930      | OK006_E_057_I1                                                 |
| 202           | 181108     | OK213_E_051_I1                                             | 98.47  | 44           | 44                   | 0                    | 0            |              | 2         | 2       | 3             | 0             | Y   | 4930      | OK213_E_051_I1                                                 |
| 202           | 181109     | CebrOK014_E_015_I1                                         | 98.47  | 44           | 44                   | 0                    | 0            |              | 2         | 2       | 3             | 0             | Y   | 4930      | CebrOK014_E_015_I1                                             |
| 202           | 181110     | OK193_E_044_I1                                             | 98.47  | 44           | 44                   | 0                    | 0            |              | 2         | 2       | 3             | 0             | Y   | 4929      | OK193_E_044_I1                                                 |
| 202           | 181111     | SRX1323887_E_041_I1                                        | 98.47  | 44           | 44                   | 0                    | 0            |              | 2         | 2       | 3             | 0             | Y   | 4929      | SRX1323887_E_041_I1                                            |
| 216           | 182208     | OK006_E_265_Conopressin                                    | 98.21  | 10           | 0                    | 10                   |              | 0            | 1         | 1       | 0             | 2             | N   | 12783     | / Conophysin                                                   |
| 216           | 182209     | CebrOK035_J_333_Conopressin/Conophysin                     | 98.21  | 9            | 0                    | 9                    |              | 0            | 1         | 1       | 0             | 2             | N   | 13777     | CebrOK035_J_333_Conopressin/Conophysin                         |
| 220           | 181117     | CebrOK033_J_111_O1                                         | 95.69  | 51           | 0                    | 51                   |              | 0            | 2         | 2       | 0             | 2             | N   | 4194      | CebrOK033_J_111_O1                                             |
| 174           | 181516     | OK213_E_029_Conkunitzin                                    | 94.00  | 15           | 15                   | 0                    | 0            |              | 2         | 2       | 5             | 0             | N   | 7109      | OK213_E_029_Conkunitzin                                        |
| 256           | 181962     | OK213_E_035_D                                              | 93.29  | 30           | 30                   | 0                    | 0            |              | 1         | 1       | 1             | 0             | Y   | 4845      | OK213_E_035_D                                                  |
| 256           | 181963     | OK193_E_028_D                                              | 93.29  | 30           | 30                   | 0                    | 0            |              | 1         | 1       | 1             | 0             | Y   | 4845      | OK193_E_028_D                                                  |
| 256           | 182212     | CebrOK014_E_009_D                                          | 93.29  | 76           | 76                   | 0                    | 0            |              | 1         | 1       | 1             | 0             | Y   | 1983      | CebrOK014_E_009_D                                              |
| 194           | 180942     | V_1258_145_T-3                                             | 89.65  | 46           | 46                   | 0                    | 0            |              | 2         | 2       | 3             | 0             | N   | 4768      | V_1258_145_T-3                                                 |
| 194           | 180943     | V_1302_153_T-3                                             | 89.65  | 46           | 46                   | 0                    | 0            |              | 2         | 2       | 3             | 0             | N   | 4768      | V_1302_153_T-3                                                 |
| 194           | 181123     | V_1302_154_T-3                                             | 89.65  | 46           | 46                   | 0                    | 0            |              | 2         | 2       | 3             | 0             | N   | 4785      | V_1302_154_T-3                                                 |
| 194           | 181124     | V_1258_144_T-3                                             | 89.65  | 46           | 46                   | 0                    | 0            |              | 2         | 2       | 3             | 0             | N   | 4785      | V_1258_144_T-3                                                 |
| 194           | 181125     | V_CG13_170_T-3                                             | 89.65  | 46           | 46                   | 0                    | 0            |              | 2         | 2       | 3             | 0             | N   | 4785      | V_CG13_170_T-3                                                 |
| 194           | 181126     | V_CG13_174_T-3                                             | 89.65  | 46           | 46                   | 0                    | 0            |              | 2         | 2       | 3             | 0             | N   | 4786      | V_CG13_174_T-3                                                 |
| 245           | 180605     | gene:107288629                                             | 86.87  | 3            | 0                    | 3                    |              | 0            | 1         | 1       | 0             | 1             | N   | 45804     | transcript:XP015672753.1 DBNLI NE162641                        |
| 205           | 182210     | CebrOK035_J_218_Q                                          | 86.20  | 36           | 0                    | 36                   |              | 0            | 1         | 1       | 0             | 3             | Y   | 3782      | CebrOK035_J_218_Q                                              |
| 205           | 182211     | OK214_J_192_Q                                              | 86.20  | 36           | 0                    | 36                   |              | 0            | 1         | 1       | 0             | 3             | Y   | 3782      | OK214_J_192_Q                                                  |
| 209           | 180185     | gene:107290492                                             | 84.88  | 3            | 0                    | 3                    |              | 0            | 1         | 1       | 0             | 2             | N   | 58417     | transcript:XP015674860.1 DBNLI NE180721                        |
| 213           | 180838     | CebrOK016_E_005_B2                                         | 84.86  | 46           | 46                   | 0                    | 0            |              | 2         | 2       | 2             | 0             | N   | 14210     | CebrOK016_E_005_B2                                             |
| 213           | 181128     | CebrOK014_E_004_B2                                         | 84.86  | 46           | 46                   | 0                    | 0            |              | 2         | 2       | 2             | 0             | N   | 14180     | CebrOK014_E_004_B2                                             |
| 213           | 181129     | CebrOK016_E_004_B2                                         | 84.86  | 46           | 46                   | 0                    | 0            |              | 2         | 2       | 2             | 0             | N   | 14180     | CebrOK016_E_004_B2                                             |
| 187           | 182218     | V_1278_082_T-3                                             | 84.64  | 24           | 24                   | 24                   | 0            | 0            | 1         | 1       | 3             | 1             | N   | 4119      | V_1278_082_T-3                                                 |
| 187           | 1391       | AXL95619_conotoxin_precursor_superfamily_T_Conus_ermineus  | 84.64  | 24           | 24                   | 24                   | 0            | 0            | 1         | 1       | 3             | 1             | N   | 4119      | AXL95619_conotoxin_precursor_s<br>uperfamily_T_Conus_ermineus  |
| 187           | 182219     | V_1278_081_T-3                                             | 84.64  | 24           | 24                   | 24                   | 0            | 0            | 1         | 1       | 3             | 1             | N   | 4119      | V_1278_081_T-3                                                 |
| 187           | 1394       | MATURECV10_022_Conotoxin_precursor_T_T_3                   | 84.64  | 24           | 24                   | 24                   | 0            | 0            | 1         | 1       | 3             | 1             | N   | 4119      | MATURECV10_022_Conotoxin_pr<br>ecursor_T_T_3                   |
| 187           | 182220     | V_1278_083_T-3                                             | 84.64  | 24           | 24                   | 24                   | 0            | 0            | 1         | 1       | 3             | 1             | N   | 4118      | V_1278_083_T-3                                                 |
| 172           | 267        | Pvau2_102                                                  | 84.51  | 2            | 2                    | 2                    | 0            | 0            | 1         | 1       | 1             | 4             | N   | 67029     | Pvau2_102                                                      |
| 172           | 324        | Pvau2_101                                                  | 84.51  | 2            | 2                    | 2                    | 0            | 0            | 1         | 1       | 1             | 4             | N   | 65840     | Pvau2_101                                                      |
| 196           | 181836     | OK213_E_130_M                                              | 83.34  | 24           | 24                   | 0                    | 0            |              | 1         | 1       | 3             | 0             | N   | 6266      | OK213_E_130_M                                                  |
| 196           | 181837     | OK193_E_113_M                                              | 83.34  | 24           | 24                   | 0                    | 0            |              | 1         | 1       | 3             | 0             | N   | 6266      | OK193_E_113_M                                                  |
| 196           | 181838     | SRX1323887_E_086_M                                         | 83.34  | 24           | 24                   | 0                    | 0            |              | 1         | 1       | 3             | 0             | N   | 6266      | SRX1323887_E_086_M                                             |
| 196           | 181839     | OK006_E_111_M                                              | 83.34  | 24           | 24                   | 0                    | 0            |              | 1         | 1       | 3             | 0             | N   | 6266      | OK006_E_111_M                                                  |
| 175           | 182271     | SRX1323887_E_022_Con-ikot-ikot                             | 82.56  | 10           | 10                   | 0                    | 0            |              | 1         | 1       | 5             | 0             | Y   | 9256      | SRX1323887_E_022_Con-ikot-iko<br>t                             |
| 175           | 182272     | OK193_E_023_Con-ikot-ikot                                  | 82.56  | 10           | 10                   | 0                    | 0            |              | 1         | 1       | 5             | 0             | Y   | 9242      | OK193_E_023_Con-ikot-ikot                                      |
| 175           | 182273     | OK006_E_022_Con-ikot-ikot                                  | 82.56  | 10           | 10                   | 0                    | 0            |              | 1         | 1       | 5             | 0             | Y   | 9256      | OK006_E_022_Con-ikot-ikot                                      |
| 175           | 182274     | OK213_E_025_Con-ikot-ikot                                  | 82.56  | 10           | 10                   | 0                    | 0            |              | 1         | 1       | 5             | 0             | Y   | 9256      | OK213_E_025_Con-ikot-ikot                                      |
| 175           | 182275     | OK006_E_021_Con-ikot-ikot                                  | 82.56  | 10           | 10                   | 0                    | 0            |              | 1         | 1       | 5             | 0             | Y   | 9361      | OK006_E_021_Con-ikot-ikot                                      |
| 253           | 1058       | JAB84712_Conodipine_Vc2_prepropeptide_Conus_victoriae      | 81.19  | 6            | 6                    | 0                    | 0            |              | 1         | 1       | 1             | 0             | N   | 19004     | JAB84712_Conodipine_Vc2_prepr<br>opeptide_Conus_victoriae      |
| 222           | 1379       | Pneo_78                                                    | 79.22  | 30           | 0                    | 30                   |              | 0            | 1         | 1       | 0             | 2             | N   | 6326      | Pneo_78                                                        |
| 263           | 182214     | OK213_E_290_Insulin-related                                | 79.03  | 12           | 12                   | 0                    | 0            |              | 1         | 1       | 1             | 0             | N   | 20850     | peptide                                                        |
| 189           | 181476     | gene:107291672                                             | 77.88  | 10           | 10                   | 10                   | 0            | 0            | 1         | 1       | 1             | 2             | N   | 10058     | transcript:XP015676180.1 DBNLI<br>NE192111                     |
| 203           | 182221     | K_0010_325_Conkunitzin-12                                  | 77.50  | 10           | 10                   | 0                    | 0            |              | 1         | 1       | 3             | 0             | N   | 12568     | K_0010_325_Conkunitzin-12                                      |
| 261           | 181980     | gene:107293627                                             | 77.33  | 2            | 0                    | 2                    |              | 0            | 1         | 1       | 0             | 1             | N   | 74837     | transcript:XP015678272.1 DBNLI<br>NE110781                     |
| 239           | 216        | Pvau2_11                                                   | 76.52  | 3            | 0                    | 3                    |              | 0            | 1         | 1       | 0             | 1             | N   | 65152     | Pvau2_11                                                       |
| 239           | 212        | Pvau2_17                                                   | 76.52  | 2            | 0                    | 2                    |              | 0            | 1         | 1       | 0             | 1             | N   | 106303    | Pvau2_17                                                       |
| 192           | 181635     | K_0010_003_Con-ikot-ikot-4                                 | 76.39  | 11           | 11                   | 0                    | 0            |              | 1         | 1       | 3             | 0             | N   | 8773      | K_0010_003_Con-ikot-ikot-4                                     |
| 204           | 182235     | V_1278_027_I1-1                                            | 75.34  | 22           | 22                   | 0                    | 0            |              | 1         | 1       | 3             | 0             | Y   | 4395      | V_1278_027_I1-1                                                |
| 204           | 182231     | V_1302_121_I1-1                                            | 75.34  | 22           | 22                   | 0                    | 0            |              | 1         | 1       | 3             | 0             | Y   | 4477      | V_1302_121_I1-1                                                |
| 204           | 182232     | V_1258_040_I1-1                                            | 75.34  | 22           | 22                   | 0                    | 0            |              | 1         | 1       | 3             | 0             | Y   | 4477      | V_1258_040_I1-1                                                |
| 204           | 182233     | A_0855_013_I1-1                                            | 75.34  | 22           | 22                   | 0                    | 0            |              | 1         | 1       | 3             | 0             | Y   | 4362      | A_0855_013_I1-1                                                |
| 204           | 182234     | A_0885_033_I1-1                                            | 75.34  | 22           | 22                   | 0                    | 0            |              | 1         | 1       | 3             | 0             | Y   | 4362      | A_0885_033_I1-1                                                |
| 204           | 182236     | A_0031_321_I1-1                                            | 75.34  | 22           | 22                   | 0                    | 0            |              | 1         | 1       | 3             | 0             | Y   | 4392      | A_0031_321_I1-1                                                |
| 204           | 182237     | A_0055_009_I1-1                                            | 75.34  | 22           | 22                   | 0                    | 0            |              | 1         | 1       | 3             | 0             | Y   | 4362      | A_0055_009_I1-1                                                |
| 204           | 1230       | AXL95521_conotoxin_precursor_superfamily_I1_Conus_ermineus | 75.34  | 22           | 22                   | 0                    | 0            |              | 1         | 1       | 3             | 0             | Y   | 4362      | AXL95521_conotoxin_precursor_s<br>uperfamily_I1_Conus_ermineus |
| 204           | 182238     | V_CG13_054_I1-1                                            | 75.34  | 22           | 22                   | 0                    | 0            |              | 1         | 1       | 3             | 0             | Y   | 4436      | V_CG13_054_I1-1                                                |
| 204           | 182239     | A_0855_014_I1-1                                            | 75.34  | 21           | 21                   | 0                    | 0            |              | 1         | 1       | 3             | 0             | Y   | 4655      | A_0855_014_I1-1                                                |
| 204           | 182240     | A_0520_205_I1-1                                            | 75.34  | 19           | 19                   | 0                    | 0            |              | 1         | 1       | 3             | 0             | Y   | 5146      | A_0520_205_I1-1                                                |
| 230           | 245780     | CV8_288_Protein                                            | 74.95  | 1            | 0                    | 1                    |              | 0            | 1         | 1       | 0             | 1             | N   | 86303     | Disulfide Isomerase                                            |
| 230           | 180526     | OK213_E_328_PDI                                            | 74.95  | 1            | 0                    | 1                    |              | 0            | 1         | 1       | 0             | 1             | N   | 86454     | OK213_E_328_PDI                                                |
| 230           | 180527     | OK006_E_297_PDI                                            | 74.95  | 1            | 0                    | 1                    |              | 0            | 1         | 1       | 0             | 1             | N   | 86468     | OK006_E_297_PDI                                                |
| 230           | 180476     | K_0010_438_Protein                                         | 74.95  | 1            | 0                    | 1                    |              | 0            | 1         | 1       | 0             | 1             | N   | 77577     | Disulfide Isomerase (PDI-A5)                                   |
| 230           | 180566     | V_1258_178_Protein                                         | 74.95  | 2            | 0                    | 2                    |              | 0            | 1         | 1       | 0             | 1             | N   | 71576     | Disulfide Isomerase (PDI-A5)                                   |
| 230           | 180567     | V_1302_231_Protein                                         | 74.95  | 2            | 0                    | 2                    |              | 0            | 1         | 1       | 0             | 1             | N   | 71576     | Disulfide Isomerase (PDI-A5)                                   |
| 230           | 180821     | CebrOK033_J_269_PDI                                        | 74.95  | 1            | 0                    | 1                    |              | 0            | 1         | 1       | 0             | 1             | N   | 82079     | CebrOK033_J_269_PDI                                            |
| 230           | 180822     | SRX1323887_E_250_PDI                                       | 74.95  | 1            | 0                    | 1                    |              | 0            | 1         | 1       | 0             | 1             | N   | 86454     | SRX1323887_E_250_PDI                                           |
| 230           | 180823     | OK214_J_339_PDI                                            | 74.95  | 1            | 0                    | 1                    |              | 0            | 1         | 1       | 0             | 1             | N   | 86501     | OK214_J_339_PDI                                                |
| 230           | 180824     | OK212_J_327_PDI                                            | 74.95  | 1            | 0                    | 1                    |              | 0            | 1         | 1       | 0             | 1             | N   | 86501     | OK212_J_327_PDI                                                |
| 230           | 180825     | OK193_E_274_PDI                                            | 74.95  | 1            | 0                    | 1                    |              | 0            | 1         | 1       | 0             | 1             | N   | 86466     | OK193_E_274_PDI                                                |
| 230           | 180826     | OK005_J_321_PDI                                            | 74.95  | 1            | 0                    | 1                    |              | 0            | 1         | 1       | 0             | 1             | N   | 86501     | OK005_J_321_PDI                                                |
| 230           | 180918     | A_0855_170_Protein                                         | 74.95  | 2            | 0                    | 2                    |              | 0            | 1         | 1       | 0             | 1             | N   | 57402     | Disulfide Isomerase (PDI-A5)                                   |
| 230           | 180919     | A_0039_255_Protein</                                       |        |              |                      |                      |              |              |           |         |               |               |     |           |                                                                |

| Protein Group | Protein ID | Accession                                                | -10lgP | Coverage (%) | Coverage (%) ebraeus | Coverage (%) judaeus | Area ebraeus | Area judaeus | #Peptides | #Unique | #Spec ebraeus | #Spec judaeus | PTM | Avg. Mass | Description                                              |
|---------------|------------|----------------------------------------------------------|--------|--------------|----------------------|----------------------|--------------|--------------|-----------|---------|---------------|---------------|-----|-----------|----------------------------------------------------------|
| 230           | 180917     | A_0875_155 Protein                                       | 74.95  | 3            | 0                    | 3                    |              | 0            | 1         | 1       | 0             | 1             | N   | 38496     | Disulfide Isomerase (PDI-A5)                             |
| 230           | 180531     | A_0885_186 Protein                                       | 74.95  | 2            | 0                    | 2                    |              | 0            | 1         | 1       | 0             | 1             | N   | 71651     | Disulfide Isomerase (PDI-A5)                             |
| 210           | 182227     | OK193_E_118_N                                            | 73.45  | 22           | 22                   | 0                    | 0            |              | 1         | 1       | 2             | 0             | N   | 4239      | OK193_E_118_N                                            |
| 210           | 182228     | SRX1323887_E_088_N                                       | 73.45  | 22           | 22                   | 0                    | 0            |              | 1         | 1       | 2             | 0             | N   | 4239      | SRX1323887_E_088_N                                       |
| 210           | 182229     | OK213_E_135_N                                            | 73.45  | 22           | 22                   | 0                    | 0            |              | 1         | 1       | 2             | 0             | N   | 4239      | OK213_E_135_N                                            |
| 210           | 182230     | OK193_E_117_N                                            | 73.45  | 22           | 22                   | 0                    | 0            |              | 1         | 1       | 2             | 0             | N   | 4239      | OK193_E_117_N                                            |
| 266           | 182242     | V_CG13_125_A-1                                           | 72.97  | 44           | 44                   | 0                    | 0            |              | 1         | 1       | 1             | 0             | Y   | 1885      | V_CG13_125_A-1                                           |
| 197           | 182225     | OK006_E_107_M                                            | 72.81  | 43           | 0                    | 43                   |              | 0            | 1         | 1       | 0             | 3             | N   | 2486      | OK006_E_107_M                                            |
| 223           | 182217     | OK213_E_203_Q                                            | 72.77  | 32           | 32                   | 0                    | 0            |              | 1         | 1       | 2             | 0             | Y   | 4152      | OK213_E_203_Q                                            |
| 217           | 182094     | OK213_E_192_O2                                           | 71.13  | 17           | 17                   | 0                    | 0            |              | 1         | 1       | 2             | 0             | N   | 5540      | OK213_E_192_O2                                           |
| 163           | 182222     | OK005_J_272_Ggeo01                                       | 70.99  | 25           | 0                    | 25                   |              | 0            | 1         | 1       | 0             | 7             | Y   | 4059      | OK005_J_272_Ggeo01                                       |
| 163           | 182223     | CebrOK035_J_299_Ggeo01                                   | 70.99  | 25           | 0                    | 25                   |              | 0            | 1         | 1       | 0             | 7             | Y   | 4059      | CebrOK035_J_299_Ggeo01                                   |
| 163           | 182224     | OK214_J_263_Ggeo01                                       | 70.99  | 25           | 0                    | 25                   |              | 0            | 1         | 1       | 0             | 7             | Y   | 4059      | OK214_J_263_Ggeo01                                       |
| 231           | 180692     | gene:107285462                                           | 70.43  | 4            | 0                    | 4                    |              | 0            | 1         | 1       | 0             | 1             | N   | 22635     | transcript:XP015669131.1 DBNLI NE 3200                   |
| 252           | 180948     | K_0010_081_Rimp                                          | 69.05  | 11           | 11                   | 0                    | 0            |              | 1         | 1       | 1             | 0             | N   | 12417     | 01                                                       |
| 258           | 181503     | OK006_E_029_Conkunitzin                                  | 69.01  | 9            | 9                    | 0                    | 0            |              | 1         | 1       | 1             | 0             | N   | 12057     | OK006_E_029_Conkunitzin                                  |
| 258           | 181504     | OK193_E_027_Conkunitzin                                  | 69.01  | 9            | 9                    | 0                    | 0            |              | 1         | 1       | 1             | 0             | N   | 12057     | OK193_E_027_Conkunitzin                                  |
| 258           | 181505     | CebrOK016_E_012_Conkunitzin                              | 69.01  | 9            | 9                    | 0                    | 0            |              | 1         | 1       | 1             | 0             | N   | 12057     | CebrOK016_E_012_Conkunitzin                              |
| 258           | 181506     | SRX1323887_E_028_Conkunitzin                             | 69.01  | 9            | 9                    | 0                    | 0            |              | 1         | 1       | 1             | 0             | N   | 12057     | SRX1323887_E_028_Conkunitzin                             |
| 258           | 181508     | OK213_E_033_Conkunitzin                                  | 69.01  | 6            | 6                    | 0                    | 0            |              | 1         | 1       | 1             | 0             | N   | 17313     | OK213_E_033_Conkunitzin                                  |
| 218           | 182243     | OK212_J_201_T                                            | 66.91  | 39           | 0                    | 39                   |              | 0            | 1         | 1       | 0             | 2             | N   | 2492      | OK212_J_201_T                                            |
| 208           | 180123     | D_092_FK506-binding                                      | 66.80  | 4            | 4                    | 4                    | 0            | 0            | 1         | 1       | 1             | 1             | N   | 24293     | protein 2-Ilke                                           |
| 211           | 181642     | SRX1323887_E_137_P                                       | 66.31  | 28           | 28                   | 0                    | 0            |              | 1         | 1       | 2             | 0             | N   | 3425      | SRX1323887_E_137_P                                       |
| 227           | 180397     | gene:107290974                                           | 65.83  | 2            | 0                    | 2                    |              | 0            | 1         | 1       | 0             | 1             | N   | 56705     | transcript:XP015675408.1 DBNLI NE 8539                   |
| 246           | 181174     | OK214_J_257_Cver07                                       | 65.46  | 6            | 0                    | 6                    |              | 0            | 1         | 1       | 0             | 1             | N   | 20908     | OK214_J_257_Cver07                                       |
| 207           | 180100     | gene:107293638                                           | 65.35  | 2            | 0                    | 2                    |              | 0            | 1         | 1       | 0             | 2             | N   | 38120     | transcript:XP015678284.1 DBNLI NE 11089                  |
| 200           | 182328     | SRX1323887_E_222_Conorfamide                             | 63.04  | 10           | 10                   | 0                    | 0            |              | 1         | 1       | 3             | 0             | N   | 8297      | SRX1323887_E_222_Conorfamide                             |
| 200           | 182329     | OK213_E_288_Conorfamide                                  | 63.04  | 10           | 10                   | 0                    | 0            |              | 1         | 1       | 3             | 0             | N   | 8297      | OK213_E_288_Conorfamide                                  |
| 200           | 182330     | OK193_E_242_Conorfamide                                  | 63.04  | 10           | 10                   | 0                    | 0            |              | 1         | 1       | 3             | 0             | N   | 8297      | OK193_E_242_Conorfamide                                  |
| 219           | 182283     | V_1258_138_Q-4                                           | 62.05  | 23           | 23                   | 0                    | 0            |              | 1         | 1       | 2             | 0             | N   | 3751      | V_1258_138_Q-4                                           |
| 219           | 182284     | V_CG13_043_Q-4                                           | 62.05  | 23           | 23                   | 0                    | 0            |              | 1         | 1       | 2             | 0             | N   | 3724      | V_CG13_043_Q-4                                           |
| 238           | 180120     | gene:107297725                                           | 61.56  | 2            | 0                    | 2                    |              | 0            | 1         | 1       | 0             | 1             | N   | 40821     | transcript:XP015682572.1 DBNLI NE 14925                  |
| 259           | 182278     | OK006_E_160_O2                                           | 61.28  | 26           | 26                   | 0                    | 0            |              | 1         | 1       | 1             | 0             | N   | 3869      | OK006_E_160_O2                                           |
| 259           | 182279     | OK006_E_159_O2                                           | 61.28  | 26           | 26                   | 0                    | 0            |              | 1         | 1       | 1             | 0             | N   | 3882      | OK006_E_159_O2                                           |
| 236           | 182244     | OK212_J_105_M                                            | 61.19  | 58           | 0                    | 58                   |              | 0            | 1         | 1       | 0             | 1             | N   | 2580      | OK212_J_105_M                                            |
| 236           | 182245     | OK213_E_106_M                                            | 61.19  | 58           | 0                    | 58                   |              | 0            | 1         | 1       | 0             | 1             | N   | 2580      | OK213_E_106_M                                            |
| 236           | 182246     | OK212_J_104_M                                            | 61.19  | 58           | 0                    | 58                   |              | 0            | 1         | 1       | 0             | 1             | N   | 2580      | OK212_J_104_M                                            |
| 236           | 182247     | OK006_E_092_M                                            | 61.19  | 58           | 0                    | 58                   |              | 0            | 1         | 1       | 0             | 1             | N   | 2580      | OK006_E_092_M                                            |
| 236           | 182248     | OK212_J_106_M                                            | 61.19  | 58           | 0                    | 58                   |              | 0            | 1         | 1       | 0             | 1             | N   | 2580      | OK212_J_106_M                                            |
| 236           | 182249     | CebrOK033_J_077_M                                        | 61.19  | 58           | 0                    | 58                   |              | 0            | 1         | 1       | 0             | 1             | N   | 2580      | CebrOK033_J_077_M                                        |
| 236           | 182250     | OK005_J_090_M                                            | 61.19  | 58           | 0                    | 58                   |              | 0            | 1         | 1       | 0             | 1             | N   | 2580      | OK005_J_090_M                                            |
| 236           | 182251     | OK212_J_101_M                                            | 61.19  | 58           | 0                    | 58                   |              | 0            | 1         | 1       | 0             | 1             | N   | 2580      | OK212_J_101_M                                            |
| 236           | 182252     | OK005_J_089_M                                            | 61.19  | 58           | 0                    | 58                   |              | 0            | 1         | 1       | 0             | 1             | N   | 2580      | OK005_J_089_M                                            |
| 236           | 182253     | OK214_J_092_M                                            | 61.19  | 58           | 0                    | 58                   |              | 0            | 1         | 1       | 0             | 1             | N   | 2580      | OK214_J_092_M                                            |
| 236           | 182254     | OK212_J_103_M                                            | 61.19  | 58           | 0                    | 58                   |              | 0            | 1         | 1       | 0             | 1             | N   | 2580      | OK212_J_103_M                                            |
| 236           | 182255     | OK214_J_091_M                                            | 61.19  | 58           | 0                    | 58                   |              | 0            | 1         | 1       | 0             | 1             | N   | 2580      | OK214_J_091_M                                            |
| 236           | 182256     | OK212_J_115_M                                            | 61.19  | 58           | 0                    | 58                   |              | 0            | 1         | 1       | 0             | 1             | N   | 2596      | OK212_J_115_M                                            |
| 236           | 182257     | OK212_J_102_M                                            | 61.19  | 58           | 0                    | 58                   |              | 0            | 1         | 1       | 0             | 1             | N   | 2580      | OK212_J_102_M                                            |
| 236           | 182258     | OK214_J_090_M                                            | 61.19  | 58           | 0                    | 58                   |              | 0            | 1         | 1       | 0             | 1             | N   | 2580      | OK214_J_090_M                                            |
| 236           | 182259     | OK212_J_109_M                                            | 61.19  | 58           | 0                    | 58                   |              | 0            | 1         | 1       | 0             | 1             | N   | 2580      | OK212_J_109_M                                            |
| 236           | 182260     | OK212_J_108_M                                            | 61.19  | 58           | 0                    | 58                   |              | 0            | 1         | 1       | 0             | 1             | N   | 2580      | OK212_J_108_M                                            |
| 236           | 182261     | CebrOK035_J_095_M                                        | 61.19  | 58           | 0                    | 58                   |              | 0            | 1         | 1       | 0             | 1             | N   | 2580      | CebrOK035_J_095_M                                        |
| 236           | 182262     | OK212_J_087_M                                            | 61.19  | 58           | 0                    | 58                   |              | 0            | 1         | 1       | 0             | 1             | N   | 2580      | OK212_J_087_M                                            |
| 236           | 182263     | OK214_J_095_M                                            | 61.19  | 58           | 0                    | 58                   |              | 0            | 1         | 1       | 0             | 1             | N   | 2624      | OK214_J_095_M                                            |
| 232           | 601        | DAC80618_TPA_inf_conodipine_partial_Conus_magus          | 60.77  | 5            | 5                    | 0                    | 0            |              | 1         | 1       | 1             | 0             | N   | 18551     | DAC80618_TPA_inf_conodipine_partial_Conus_magus          |
| 232           | 180309     | OK212_J_293_Conodipine                                   | 60.77  | 4            | 4                    | 0                    | 0            |              | 1         | 1       | 1             | 0             | N   | 20620     | OK212_J_293_Conodipine                                   |
| 232           | 180367     | OK212_J_292_Conodipine                                   | 60.77  | 4            | 4                    | 0                    | 0            |              | 1         | 1       | 1             | 0             | N   | 20809     | OK212_J_292_Conodipine                                   |
| 232           | 180682     | V_CG13_220_Conodipine-2                                  | 60.77  | 5            | 5                    | 0                    | 0            |              | 1         | 1       | 1             | 0             | N   | 17071     | V_CG13_220_Conodipine-2                                  |
| 232           | 180624     | V_1258_222_Conodipine-2                                  | 60.77  | 4            | 4                    | 0                    | 0            |              | 1         | 1       | 1             | 0             | N   | 20525     | V_1258_222_Conodipine-2                                  |
| 232           | 180639     | V_1302_262_Conodipine-2                                  | 60.77  | 4            | 4                    | 0                    | 0            |              | 1         | 1       | 1             | 0             | N   | 20361     | V_1302_262_Conodipine-2                                  |
| 232           | 180625     | V_1302_263_Conodipine-2                                  | 60.77  | 4            | 4                    | 0                    | 0            |              | 1         | 1       | 1             | 0             | N   | 20531     | V_1302_263_Conodipine-2                                  |
| 232           | 246068     | CVR_259_Conodipine                                       | 60.77  | 4            | 4                    | 0                    | 0            |              | 1         | 1       | 1             | 0             | N   | 20466     | CVR_259_Conodipine                                       |
| 232           | 180756     | OK212_J_290_Conodipine                                   | 60.77  | 4            | 4                    | 0                    | 0            |              | 1         | 1       | 1             | 0             | N   | 20627     | OK212_J_290_Conodipine                                   |
| 232           | 181511     | OK212_J_291_Conodipine                                   | 60.77  | 4            | 4                    | 0                    | 0            |              | 1         | 1       | 1             | 0             | N   | 20816     | OK212_J_291_Conodipine                                   |
| 237           | 179993     | gene:107302264                                           | 60.44  | 9            | 0                    | 9                    |              | 0            | 1         | 1       | 0             | 1             | N   | 11204     | transcript:XP015686849.1 DBNLI NE 18974                  |
| 237           | 180003     | gene:107302095                                           | 60.44  | 6            | 0                    | 6                    |              | 0            | 1         | 1       | 0             | 1             | N   | 17676     | transcript:XP015686704.1 DBNLI NE 18836                  |
| 214           | 181139     | A_0239_128_M-3a-WF                                       | 60.04  | 29           | 29                   | 0                    | 0            |              | 1         | 1       | 2             | 0             | N   | 3379      | A_0239_128_M-3a-WF                                       |
| 214           | 181140     | A_0239_131_M-3a-WF                                       | 60.04  | 28           | 28                   | 0                    | 0            |              | 1         | 1       | 2             | 0             | N   | 3507      | A_0239_131_M-3a-WF                                       |
| 214           | 182295     | OK214_J_079_M                                            | 60.04  | 40           | 40                   | 0                    | 0            |              | 1         | 1       | 2             | 0             | N   | 2373      | OK214_J_079_M                                            |
| 214           | 182296     | A_1387_079                                               | 60.04  | 38           | 38                   | 0                    | 0            |              | 1         | 1       | 2             | 0             | N   | 2602      | M-3a-WF                                                  |
| 214           | 182297     | OK006_E_081_M                                            | 60.04  | 32           | 32                   | 0                    | 0            |              | 1         | 1       | 2             | 0             | N   | 2967      | OK006_E_081_M                                            |
| 214           | 182298     | OK212_J_098_M                                            | 60.04  | 30           | 30                   | 0                    | 0            |              | 1         | 1       | 2             | 0             | N   | 3140      | OK212_J_098_M                                            |
| 214           | 182299     | K_0010_334_M-3a                                          | 60.04  | 27           | 27                   | 0                    | 0            |              | 1         | 1       | 2             | 0             | N   | 3609      | K_0010_334_M-3a                                          |
| 214           | 182300     | A_1387_077                                               | 60.04  | 26           | 26                   | 0                    | 0            |              | 1         | 1       | 2             | 0             | N   | 3769      | M-3a                                                     |
| 214           | 182301     | K_0010_335_M-3a-WF                                       | 60.04  | 24           | 24                   | 0                    | 0            |              | 1         | 1       | 2             | 0             | N   | 4026      | K_0010_335_M-3a-WF                                       |
| 214           | 1136       | AXL95709_conotoxin_precursor_superfamily_M_partial_Conus | 60.04  | 19           | 19                   | 0                    | 0            |              | 1         | 1       | 2             | 0             | N   | 5023      | AXL95709_conotoxin_precursor_superfamily_M_partial_Conus |
| 214           | 1066       | DAC80580_TPA_inf_conotoxin_superfamily_M_Conus           | 60.04  | 18           | 18                   | 0                    | 0            |              | 1         | 1       | 2             | 0             | N   | 5313      | DAC80580_TPA_inf_conotoxin_superfamily_M_Conus           |
| 214           | 1067       | QFQ61048_conotoxin_superfamily_M_Conus_magus             | 60.04  | 18           | 18                   | 0                    | 0            |              | 1         | 1       | 2             | 0             | N   | 5204      | QFQ61048_conotoxin_superfamily_M_Conus_magus             |
| 221           | 181374     | gene:107283272                                           | 59.84  | 7            | 7                    | 7                    | 0            | 0            | 1         | 1       | 1             | 1             | N   | 10960     | transcript:XP015666633.1 DBNLI NE 1071                   |
| 257           | 181031     | gene:107295193                                           | 58.82  | 4            | 0                    | 4                    |              | 0            | 1         | 1       | 0             | 1             | N   | 26111     | transcript:XP015679983.1 DBNLI NE 12586                  |
| 255           | 182281     | OK214_J_161_O2                                           | 58.28  | 32           | 0                    | 32                   |              | 0            | 1         | 1       | 0             | 1             | N   | 3006      | OK214_J_161_O2                                           |
| 255           | 182282     | OK214_J_169_O2                                           | 58.28  | 25           | 0                    | 25                   |              | 0            | 1         | 1       | 0             | 1             | N   | 3636      | OK214_J_169_O2                                           |
| 242           | 182310     | OK006_E_230_Ggeo01                                       | 58.10  | 22           | 22                   | 0                    | 0            |              | 1         | 1       | 1             | 0             | N   | 4655      | OK006_E_230_Ggeo01                                       |
| 264           | 1383       | P08581                                                   | 58.09  | 30           | 30                   | 0                    | 0            |              | 1         | 1       | 1             | 0             | Y   | 5013      | P08581                                                   |
| 264           | 182285     | OK193_E_233_SF-mi2                                       | 58.09  | 30           | 30                   | 0                    | 0            |              | 1         | 1       | 1             | 0             | Y   | 4981      | OK193_E_233_SF-mi2                                       |
| 250           | 182353     | gene:107292229                                           | 58.05  | 12           | 0                    | 12                   |              | 0            | 1         | 1       | 0             | 1             | N   | 15667     | transcript:XP015676788.1 DBNLI NE 9736                   |
| 260           | 181408     | OK214_J_009_B2                                           | 58.02  | 13           | 13                   | 0                    | 0            |              | 1         | 1       | 1             | 0             | N   | 10396     | OK214_J_009_B2                                           |
| 193           | 182286     | OK214_J_276_Rimp01                                       | 57.67  | 15           | 15                   | 0                    | 0            |              | 1         | 1       | 3             | 0             | Y   | 7109      | OK214_J_276_Rimp01                                       |
| 193           | 182288     | OK006_E_239_Rimp01                                       | 57.67  | 9            | 9                    | 0                    | 0            |              | 1         | 1       | 3             | 0             | Y   | 12321     | OK006_E_239_Rimp01                                       |
| 193           | 182289     | OK213_E_266_Rimp01                                       | 57.67  | 9            | 9                    | 0                    | 0            |              | 1         | 1       | 3             | 0             | Y   | 12369     | OK213_E_266_Rimp01                                       |
| 193           | 18229      |                                                          |        |              |                      |                      |              |              |           |         |               |               |     |           |                                                          |

















| Peptide           | Uniq | -10lgP | Mass     | Length | ppm | m/z      | z | RT    | Fraction | Scan     | Source File                                | Area ebraeus | Area judaeus | #Feature | #Feature ebraeus | #Feature judaeus | Start | End | PTM | AScore | Found By |
|-------------------|------|--------|----------|--------|-----|----------|---|-------|----------|----------|--------------------------------------------|--------------|--------------|----------|------------------|------------------|-------|-----|-----|--------|----------|
| K.ALAPEYAK.A      | N    | 62.34  | 861.4596 | 8      | 3.5 | 431.7368 | 2 | 19.50 | 2        | F2:65275 | 20210611-09_2021021-OK160A_816_5.3.236.mgf | 0            | 0            | 0        | 0                | 0                | 58    | 65  |     |        | PEAKS DB |
| K.DGVVLLK.K       | N    | 61.62  | 742.4589 | 7      | 1.0 | 372.2355 | 2 | 30.45 | 2        | F2:84009 | 20210611-09_2021021-OK160A_816_5.3.236.mgf | 0            | 0            | 0        | 0                | 0                | 201   | 207 |     |        | PEAKS DB |
| K.EGGEDTIEK.F     | N    | 59.47  | 976.4349 | 9      | 3.4 | 489.2243 | 2 | 12.93 | 2        | F2:56083 | 20210611-09_2021021-OK160A_816_5.3.236.mgf |              | 0            | 0        | 0                | 0                | 264   | 272 |     |        | PEAKS DB |
| K.IFGGEVK.N       | N    | 59.09  | 748.4119 | 7      | 4.2 | 375.2134 | 2 | 21.69 | 1        | F1:13485 | 20210611-08_2021021-OK192A_815_5.3.236.mgf | 0            | 0            | 0        | 0                | 0                | 248   | 254 |     |        | PEAKS DB |
| total 39 peptides |      |        |          |        |     |          |   |       |          |          |                                            |              |              |          |                  |                  |       |     |     |        |          |

V\_1278\_121\_Protein

[back to list](#)

| [Protein Coverage](#) | [Supporting Peptides](#) |

Protein Coverage:

|     |                                                                                                                                                  |                                                                                                                                                                                                                                                                                                            |
|-----|--------------------------------------------------------------------------------------------------------------------------------------------------|------------------------------------------------------------------------------------------------------------------------------------------------------------------------------------------------------------------------------------------------------------------------------------------------------------|
| 1   | MKFSSCLVLT LLVFSVAEDV <b>KQEEGVHVLTK</b> NFDSFIAD NEFVLVEFYA PWC <del>GHCK</del> <b>ALA PEYAKAATTL EEEKLNVLK</b> L                               | <div><div></div><div></div><div></div><div></div><div></div><div></div><div></div><div></div><div></div><div></div><div></div><div></div><div></div><div></div><div></div><div></div><div></div><div></div><div></div><div></div><div></div><div></div><div></div></div> <div>Oxidation (M) (+15.99)</div> |
| 81  | <b>KV</b> DATVEESL <b>ASK</b> FEVRGYP TIKFFR <b>KEKP</b> DGPADYNGGR <b>QAADIVNW</b> LK KKTGPPAKEL KEKDEVKSFV EKDEVVVIGF                          | <div><div></div><div></div><div></div><div></div><div></div><div></div><div></div><div></div><div></div><div></div><div></div><div></div><div></div><div></div><div></div><div></div><div></div><div></div><div></div><div></div><div></div><div></div><div></div></div>                                   |
| 161 | FK <b>DQ</b> ESTGAL AFK <b>KAA</b> GID DIPFAITSED <b>HVFKE</b> YKMDK <b>DGIVLLK</b> KFD EGR <b>ND</b> FEGEF <b>EEEEIVKHVR</b> <b>ENQLPLVVEF</b>  | <div><div></div><div></div><div></div><div></div><div></div><div></div><div></div><div></div><div></div><div></div><div></div><div></div><div></div><div></div><div></div><div></div><div></div><div></div><div></div><div></div><div></div><div></div><div></div></div>                                   |
| 241 | <b>TQ</b> ESAQKIFG GEVKNHILLF LKKEGGEDTI <b>EK</b> FRGAAGDF KGKVLFIYLD TDNEENGR <b>IT</b> EFFGLK <b>DDEI</b> PAVRLI <b>QLAE</b>                  | <div><div></div><div></div><div></div><div></div><div></div><div></div><div></div><div></div><div></div><div></div><div></div><div></div><div></div><div></div><div></div><div></div><div></div><div></div><div></div><div></div><div></div><div></div><div></div></div>                                   |
| 321 | <b>DMSKYKPESL</b> DLETATIK <b>KF</b> VQDFLDGKLK <b>PHL</b> SEDVPD <b>DWD</b> AKPVKVL VGKNFKEVAM DSKAVFVEF YAPWCGHCK <b>Q</b>                     | <div><div></div><div></div><div></div><div></div><div></div><div></div><div></div><div></div><div></div><div></div><div></div><div></div><div></div><div></div><div></div><div></div><div></div><div></div><div></div><div></div><div></div><div></div><div></div></div>                                   |
| 401 | <b>LAPIW</b> DELGE <b>K</b> YKDSKDIVV AK <b>MD</b> ATANEI <b>EEVKQ</b> SFPT <b>LK</b> YFP <b>R</b> DSEE AVDYNGERTL DAFIK <b>F</b> LES GTEGAGVPED | <div><div></div><div></div><div></div><div></div><div></div><div></div><div></div><div></div><div></div><div></div><div></div><div></div><div></div><div></div><div></div><div></div><div></div><div></div><div></div><div></div><div></div><div></div><div></div></div>                                   |
| 481 | EEEEEEDEGD DEDLPRDEL                                                                                                                             | <div><div></div><div></div><div></div><div></div><div></div><div></div><div></div><div></div><div></div><div></div><div></div><div></div><div></div><div></div><div></div><div></div><div></div><div></div><div></div><div></div><div></div><div></div><div></div></div>                                   |

Supporting Peptides:

| Peptide                        | Uniq | -10lgP | Mass      | Length | ppm  | m/z      | z | RT    | Fraction | Scan      | Source File                                | Area ebraeus | Area judaeus | #Feature | #Feature ebraeus | #Feature judaeus | Start | End | PTM           | AScore                     | Found By |
|--------------------------------|------|--------|-----------|--------|------|----------|---|-------|----------|-----------|--------------------------------------------|--------------|--------------|----------|------------------|------------------|-------|-----|---------------|----------------------------|----------|
| R.ENQLPLVVEFTQESAQK.I          | N    | 122.23 | 1958.9949 | 17     | -2.6 | 654.0012 | 3 | 51.77 | 2        | F2:121715 | 20210611-09_2021021-OK160A_816_5.3.236.mgf | 0            | 0            | 0        | 0                | 0                | 231   | 247 |               |                            | PEAKS DB |
| K.LKPHLM(+15.99)SEDPDDWDAPVK.V | N    | 120.27 | 2335.1519 | 20     | 3.0  | 779.3903 | 3 | 29.56 | 2        | F2:82514  | 20210611-09_2021021-OK160A_816_5.3.236.mgf | 0            | 0            | 0        | 0                | 0                | 349   | 368 |               | M6:Oxidation (M):1000.00   | PEAKS DB |
| K.AAAGDIDIPAITSEDHVFK.E        | N    | 119.10 | 2116.0476 | 20     | -1.9 | 706.3525 | 3 | 51.54 | 1        | F1:48186  | 20210611-08_2021021-OK192A_815_5.3.236.mgf | 0            |              | 0        | 0                | 0                | 175   | 194 |               |                            | PEAKS DB |
| R.NDFEGFEIEAIVK.H              | N    | 117.74 | 1654.7362 | 14     | 1.2  | 828.3729 | 2 | 42.82 | 2        | F2:106304 | 20210611-09_2021021-OK160A_816_5.3.236.mgf | 0            | 0            | 0        | 0                | 0                | 214   | 227 |               |                            | PEAKS DB |
| K.DSEEAVDYNGER.T               | N    | 116.33 | 1382.5586 | 12     | -6.2 | 692.2794 | 2 | 19.77 | 2        | F2:65987  | 20210611-09_2021021-OK160A_816_5.3.236.mgf | 0            | 0            | 0        | 0                | 0                | 447   | 458 |               |                            | PEAKS DB |
| K.MDATANIEIEVK.V               | N    | 113.62 | 1348.6180 | 12     | 2.7  | 675.3153 | 2 | 28.09 | 2        | F2:79934  | 20210611-09_2021021-OK160A_816_5.3.236.mgf |              | 0            | 0        | 0                | 0                | 423   | 434 |               |                            | PEAKS DB |
| R.ITEFFGLKDDEIPAVR.L           | N    | 113.32 | 1848.9620 | 16     | -0.6 | 617.3253 | 3 | 47.36 | 1        | F1:45510  | 20210611-08_2021021-OK192A_815_5.3.236.mgf | 0            | 0            | 0        | 0                | 0                | 299   | 314 |               |                            | PEAKS DB |
| K.LKPHLMSEDVPDDWDAPVK.V        | N    | 106.07 | 2319.1567 | 20     | 7.8  | 774.0623 | 3 | 33.33 | 2        | F2:89240  | 20210611-09_2021021-OK160A_816_5.3.236.mgf | 0            | 0            | 0        | 0                | 0                | 349   | 368 |               |                            | PEAKS DB |
| K.VDATVEESLASK.F               | N    | 104.50 | 1247.6245 | 12     | 3.3  | 624.8192 | 2 | 26.76 | 1        | F1:20877  | 20210611-08_2021021-OK192A_815_5.3.236.mgf | 0            |              | 0        | 0                | 0                | 82    | 93  |               |                            | PEAKS DB |
| K.M(+15.99)DATANIEIEVK.V       | N    | 99.38  | 1364.6129 | 12     | -1.0 | 683.3102 | 2 | 25.80 | 2        | F2:75953  | 20210611-09_2021021-OK160A_816_5.3.236.mgf | 0            | 0            | 0        | 0                | 0                | 423   | 434 | Oxidation (M) | M1:Oxidation (M):1000.00   | PEAKS DB |
| R.LIQLAEDMSK.Y                 | N    | 97.87  | 1146.5955 | 10     | 2.2  | 574.3038 | 2 | 34.62 | 2        | F2:91986  | 20210611-09_2021021-OK160A_816_5.3.236.mgf | 0            | 0            | 0        | 0                | 0                | 315   | 324 |               |                            | PEAKS DB |
| K.KFVQDFLDGK.L                 | N    | 95.51  | 1195.6237 | 10     | 2.0  | 598.8178 | 2 | 34.51 | 2        | F2:91583  | 20210611-09_2021021-OK160A_816_5.3.236.mgf |              | 0            | 0        | 0                | 0                | 339   | 348 |               |                            | PEAKS DB |
| K.Q(-17.03)LAPIWDELGEK.Y       | N    | 95.23  | 1380.6925 | 12     | -1.5 | 691.3496 | 2 | 59.13 | 2        | F2:131431 | 20210611-09_2021021-OK160A_816_5.3.236.mgf | 0            | 0            | 0        | 0                | 0                | 400   | 411 |               | Q1:Pyro-glu from Q:1000.00 | PEAKS DB |
| R.LIQLAEDM(+15.99)SK.Y         | N    | 94.94  | 1162.5903 | 10     | 1.4  | 582.3008 | 2 | 26.69 | 2        | F2:77509  | 20210611-09_2021021-OK160A_816_5.3.236.mgf | 0            | 0            | 0        | 0                | 0                | 315   | 324 |               | M8:Oxidation (M):1000.00   | PEAKS DB |
| K.DQUESTGALAFK.K               | N    | 94.65  | 1165.5615 | 11     | 4.3  | 583.7881 | 2 | 28.45 | 2        | F2:80728  | 20210611-09_2021021-OK160A_816_5.3.236.mgf | 0            | 0            | 0        | 0                | 0                | 163   | 173 |               |                            | PEAKS DB |
| K.KYPESLDLETATIK.K             | N    | 92.19  | 1606.8453 | 14     | -0.3 | 536.6202 | 3 | 34.14 | 1        | F1:30794  | 20210611-08_2021021-OK192A_815_5.3.236.mgf | 0            |              | 0        | 0                | 0                | 325   | 338 |               |                            | PEAKS DB |
| R.QAADIVNWLK.K                 | N    | 90.48  | 1156.6240 | 10     | 2.2  | 579.3184 | 2 | 45.94 | 1        | F1:44192  | 20210611-08_2021021-OK192A_815_5.3.236.mgf | 0            |              | 0        | 0                | 0                | 121   | 130 |               |                            | PEAKS DB |
| K.NHILLFLK.K                   | N    | 86.51  | 996.6120  | 8      | 3.6  | 499.3132 | 2 | 39.74 | 1        | F1:37317  | 20210611-08_2021021-OK192A_815_5.3.236.mgf | 0            | 0            | 0        | 0                | 0                | 255   | 262 |               |                            | PEAKS DB |
| R.E(-18.01)NQLPLVVEFTQESAQK.I  | N    | 86.27  | 1940.9843 | 17     | -6.1 | 971.4894 | 2 | 58.57 | 2        | F2:130865 | 20210611-09_2021021-OK160A_816_5.3.236.mgf |              | 0            | 0        | 0                | 0                | 231   | 247 |               | E1:Pyro-glu from E:1000.00 | PEAKS DB |
| K.QLAPIWDELGEK.Y               | N    | 82.76  | 1397.7190 | 12     | 0.5  | 699.8645 | 2 | 48.72 | 1        | F1:46550  | 20210611-08_2021021-OK192A_815_5.3.236.mgf | 0            | 0            | 0        | 0                | 0                | 400   | 411 |               |                            | PEAKS DB |
| K.FVQDFLDGK.L                  | N    | 79.93  | 1067.5287 | 9      | 1.0  | 534.7699 | 2 | 37.97 | 2        | F2:97970  | 20210611-09_2021021-OK160A_816_5.3.236.mgf | 0            | 0            | 0        | 0                | 0                | 340   | 348 |               |                            | PEAKS DB |
| K.NHILLFLKK.E                  | N    | 79.31  | 1124.7069 | 9      | 5.4  | 375.9102 | 3 | 30.94 | 1        | F1:26438  | 20210611-08_2021021-OK192A_815_5.3.236.mgf | 0            | 0            | 0        | 0                | 0                | 255   | 263 |               |                            | PEAKS DB |
| K.VQSFP TLK.Y                  | N    | 75.55  | 918.5175  | 8      | 3.7  | 460.2658 | 2 | 29.78 | 2        | F2:82955  | 20210611-09_2021021-OK160A_816_5.3.236.mgf | 0            | 0            | 0        | 0                | 0                | 435   | 442 |               |                            | PEAKS DB |
| K.EKPDGPADYNGGR.Q              | N    | 73.49  | 1374.6163 | 13     | -1.1 | 688.3121 | 2 | 13.78 | 1        | F1:5004   | 20210611-08_2021021-OK192A_815_5.3.236.mgf | 0            |              | 0        | 0                | 0                | 108   | 120 |               |                            | PEAKS DB |
| K.DDEIPAVR.L                   | N    | 71.69  | 913.4504  | 8      | 0.8  | 457.7310 | 2 | 24.89 | 2        | F2:74398  | 20210611-09_2021021-OK160A_816_5.3.236.mgf | 0            | 0            | 0        | 0                | 0                | 307   | 314 |               |                            | PEAKS DB |
| R.ITEFFGLK.D                   | N    | 66.91  | 953.5222  | 8      | 0.9  | 477.7668 | 2 | 42.32 | 2        | F2:105336 | 20210611-09_2021021-OK160A_816_5.3.236.mgf | 0            | 0            | 0        | 0                | 0                | 299   | 306 |               |                            | PEAKS DB |
| K.ALAPEYAK.A                   | N    | 62.34  | 861.4596  | 8      | 3.5  | 431.7368 | 2 | 19.50 | 2        | F2:65275  | 20210611-08_2021021-OK160A_816_5.3.236.mgf | 0            | 0            | 0        | 0                | 0                | 58    | 65  |               |                            | PEAKS DB |
| R.TLDAFIK.F                    | N    | 61.58  | 806.4538  | 7      | 2.3  | 404.2336 | 2 | 33.58 | 1        | F1:29977  | 20210611-08_2021021-OK192A_815_5.3.236.mgf | 0            |              | 0        | 0                | 0                | 459   | 465 |               |                            | PEAKS DB |
| K.AATLEEELNVK.L                | N    | 59.94  | 1444.7773 | 13     | -0.8 | 482.5975 | 3 | 24.76 | 1        | F1:17934  | 20210611-08_2021021-OK192A_815_5.3.236.mgf | 0            |              | 0        | 0                | 0                | 66    | 78  |               |                            | PEAKS DB |
| K.EGGEDTIEK.F                  | N    | 59.47  | 976.4349  | 9      | 3.4  | 489.2243 | 2 | 12.93 | 2        | F2:56083  | 20210611-09_2021021-OK160A_816_5.3.236.mgf |              | 0            | 0        | 0                | 0                | 264   | 272 |               |                            | PEAKS DB |
| K.IFGGEVK.N                    | N    | 59.09  | 748.4119  | 7      | 4.2  | 375.2134 | 2 | 21.69 | 1        | F1:13485  | 20210611-08_2021021-OK192A_815_5.3.236.mgf | 0            | 0            | 0        | 0                | 0                | 248   | 254 |               |                            | PEAKS DB |
| K.DGIVLLK.K                    | N    | 56.48  | 756.4745  | 7      | 0.5  | 379.2433 | 2 | 35.60 | 1        | F1:32687  | 20210611-08_2021021-OK192A_815_5.3.236.mgf | 0            |              | 0        | 0                | 0                | 201   | 207 |               |                            | PEAKS DB |
| K.QEEGVHVLTK.N                 | Y    | 56.41  | 1239.6459 | 11     | -1.2 | 620.8271 | 2 | 19.69 | 1        | F1:11068  | 20210611-08_2021021-OK192A_815_5.3.236.mgf | 0            |              | 0        | 0                | 0                | 22    | 32  |               |                            | PEAKS DB |
| total 33 peptides              |      |        |           |        |      |          |   |       |          |           |                                            |              |              |          |                  |                  |       |     |               |                            |          |

V\_1302\_228\_Protein

[back to list](#)

| [Protein Coverage](#) | [Supporting Peptides](#) |

Protein Coverage:

1 MKFSSCLVLT LLVFSVSAEDV **RQEEGVHVLTKN**FDSEFIAD NEFVLVEFYA PWC~~GHCK~~**ALA** PEYAKAATTL **EEEKLNVK**LG ■ Oxidation (M) (+15.99)

81 **KVDATVEESL** ASKFEVGRYP TIKFFR**EKPDG**ADYNGGR **QAADIVNWLK** KKTGPPAKEL KEKDEVKSFV EKDEVVVIGF

161 **FKDQESTGAL** AFK**AAAGID** DIPFAITSED HVFKEYKMDK **DGIVLLK**KFD EGR**NDFEGEF** **EEEAIVK**HVR **ENQLPLVVEF**

241 **TQESAQKIFG** GEVKNHILLF LKKEGGEDTI EKFRGAAGDF KGKVLFIYLD TDNEENGR**IT** **EFFGLKDEI** **PAVRLIQLAE**

321 **DMSKYKPESL** DLETATIKKF VQDFLDGKLK **PHLMS**EDVPD **DWDAK**PVKVL VGKNFKEVAM DSKAVFVEF YAPWCGHCK**Q**

401 **LAPIWDELGE** KYKDSKDIV AK**MDATANEI** **EEVKVS**FPT LKYF**PKD**SEE AVDYNGERTL **DAFIK**FLESG GTEGAGVPED

481 EEEEEDEGD DEDLPDEL

### Supporting Peptides:

| Peptide                        | Uniq | -10lgP | Mass      | Length | ppm  | m/z      | z | RT    | Fraction | Scan      | Source File                                | Area ebraus | Area judaeus | #Feature | #Feature ebraus | #Feature judaeus | Start | End | PTM           | AScore                       | Found By |
|--------------------------------|------|--------|-----------|--------|------|----------|---|-------|----------|-----------|--------------------------------------------|-------------|--------------|----------|-----------------|------------------|-------|-----|---------------|------------------------------|----------|
| R.ENQLPLVVEFTQESAQK.I          | N    | 122.23 | 1958.9949 | 17     | -2.6 | 654.0012 | 3 | 51.77 | 2        | F2:121715 | 20210611-09_2021021-OK160A_816_5.3.236.mgf | 0           | 0            | 0        | 0               | 0                | 231   | 247 |               |                              | PEAKS DB |
| K.LKPHLM(+15.99)SEDPDDWDAPVK.V | N    | 120.27 | 2335.1519 | 20     | 3.0  | 779.3903 | 3 | 29.56 | 2        | F2:82514  | 20210611-09_2021021-OK160A_816_5.3.236.mgf | 0           | 0            | 0        | 0               | 0                | 349   | 368 |               | M6:Oxidat ion (M):1 000.00   | PEAKS DB |
| K.AAAGIDDIPFATISDHFVK.E        | N    | 119.10 | 2116.0476 | 20     | -1.9 | 706.3525 | 3 | 51.54 | 1        | F1:48186  | 20210611-08_2021021-OK192A_815_5.3.236.mgf | 0           |              | 0        | 0               | 0                | 175   | 194 |               |                              | PEAKS DB |
| R.NDFEGEFEEEAIVK.H             | N    | 117.74 | 1654.7362 | 14     | 1.2  | 828.3729 | 2 | 42.82 | 2        | F2:106304 | 20210611-09_2021021-OK160A_816_5.3.236.mgf | 0           | 0            | 0        | 0               | 0                | 214   | 227 |               |                              | PEAKS DB |
| K.DSEEAVDYNGER.T               | N    | 116.33 | 1382.5586 | 12     | -6.2 | 692.2794 | 2 | 19.77 | 2        | F2:65987  | 20210611-09_2021021-OK160A_816_5.3.236.mgf | 0           | 0            | 0        | 0               | 0                | 447   | 458 |               |                              | PEAKS DB |
| K.MDATANEIEEVK.V               | N    | 113.62 | 1348.6180 | 12     | 2.7  | 675.3153 | 2 | 28.09 | 2        | F2:79934  | 20210611-09_2021021-OK160A_816_5.3.236.mgf |             | 0            | 0        | 0               | 0                | 423   | 434 |               |                              | PEAKS DB |
| R.ITEFFGLKDDEIPAVR.L           | N    | 113.32 | 1848.9620 | 16     | -0.6 | 617.3253 | 3 | 47.36 | 1        | F1:45510  | 20210611-08_2021021-OK192A_815_5.3.236.mgf | 0           | 0            | 0        | 0               | 0                | 299   | 314 |               |                              | PEAKS DB |
| K.LKPHLMSEDPDDWDAPVK.V         | N    | 106.07 | 2319.1567 | 20     | 7.8  | 774.0623 | 3 | 33.33 | 2        | F2:89240  | 20210611-09_2021021-OK160A_816_5.3.236.mgf | 0           | 0            | 0        | 0               | 0                | 349   | 368 |               |                              | PEAKS DB |
| K.VDATVEESLASK.F               | N    | 104.50 | 1247.6245 | 12     | 3.3  | 624.8192 | 2 | 26.76 | 1        | F1:20877  | 20210611-08_2021021-OK192A_815_5.3.236.mgf | 0           |              | 0        | 0               | 0                | 82    | 93  |               |                              | PEAKS DB |
| K.M(+15.99)DATANEIEEVK.V       | N    | 99.38  | 1364.6129 | 12     | -1.0 | 683.3102 | 2 | 25.80 | 2        | F2:75953  | 20210611-09_2021021-OK160A_816_5.3.236.mgf | 0           | 0            | 0        | 0               | 0                | 423   | 434 | Oxidation (M) | M1:Oxidat ion (M):1 000.00   | PEAKS DB |
| R.LIQLAEDMSK.Y                 | N    | 97.87  | 1146.5955 | 10     | 2.2  | 574.3038 | 2 | 34.62 | 2        | F2:91986  | 20210611-09_2021021-OK160A_816_5.3.236.mgf | 0           | 0            | 0        | 0               | 0                | 315   | 324 |               |                              | PEAKS DB |
| K.KFVQDFLDGK.L                 | N    | 95.51  | 1195.6237 | 10     | 2.0  | 598.8178 | 2 | 34.51 | 2        | F2:91583  | 20210611-09_2021021-OK160A_816_5.3.236.mgf |             | 0            | 0        | 0               | 0                | 339   | 348 |               |                              | PEAKS DB |
| K.Q(-17.03)LAPIWDELGEK.Y       | N    | 95.23  | 1380.6925 | 12     | -1.5 | 691.3496 | 2 | 59.13 | 2        | F2:131431 | 20210611-09_2021021-OK160A_816_5.3.236.mgf | 0           | 0            | 0        | 0               | 0                | 400   | 411 |               | Q1:Pyro-g lu from Q: 1000.00 | PEAKS DB |
| R.LIQLAEDM(+15.99)SK.Y         | N    | 94.94  | 1162.5903 | 10     | 1.4  | 582.3008 | 2 | 26.69 | 2        | F2:77509  | 20210611-09_2021021-OK160A_816_5.3.236.mgf | 0           | 0            | 0        | 0               | 0                | 315   | 324 |               | M8:Oxidat ion (M):1 000.00   | PEAKS DB |
| K.DQESTGALAFK.K                | N    | 94.65  | 1165.5615 | 11     | 4.3  | 583.7881 | 2 | 28.45 | 2        | F2:80728  | 20210611-09_2021021-OK160A_816_5.3.236.mgf | 0           | 0            | 0        | 0               | 0                | 163   | 173 |               |                              | PEAKS DB |
| K.YKPESLDLETATIK.K             | N    | 92.19  | 1606.8453 | 14     | -0.3 | 536.6202 | 3 | 34.14 | 1        | F1:30794  | 20210611-08_2021021-OK192A_815_5.3.236.mgf | 0           |              | 0        | 0               | 0                | 325   | 338 |               |                              | PEAKS DB |
| R.QAADIVNWLK.K                 | N    | 90.48  | 1156.6240 | 10     | 2.2  | 579.3184 | 2 | 45.94 | 1        | F1:44192  | 20210611-08_2021021-OK192A_815_5.3.236.mgf | 0           |              | 0        | 0               | 0                | 121   | 130 |               |                              | PEAKS DB |
| K.NHILLFLK.K                   | N    | 86.51  | 996.6120  | 8      | 3.6  | 499.3132 | 2 | 39.74 | 1        | F1:37317  | 20210611-08_2021021-OK192A_815_5.3.236.mgf | 0           | 0            | 0        |                 |                  |       |     |               |                              |          |

**total 33 peptides**

### V\_1258\_220\_Protein

**[back to list](#)**

[| Protein Coverage](#) | [Supporting Peptides](#) |

### Protein Coverage:

1 MKFSSCLVLT LLVFSVSAEDV **RQEEGVHVLTK**KNFDSFIAD NEFVLVEFYA PWC~~GHCK~~**ALA** PEYAKAATTL **EEEKLNV**KL~~G~~ ■ Oxidation (M) (+15.99)

81 **KVDATVEESL** ASK~~FEV~~RGYP TIKFFR**KEPK** DGPADYNGGR **QAADIVNWLK** KKTGPPAKEL KEKDEVKSFV EKDEVVVIGF

161 **FKDQESTGAL** AFK~~AAA~~GID DIPFAITS**ED** HVFKEYKMDK **DGIVLLK**KFD EGR**NDFEGEF** **EEEAIVK**HVR **ENQLPLVVEF**

241 **TQESAQKIFG** GEVKNHILLF LKKEGGEDTI **EK**FRGAAGDF KGKVLFIYLD TDNEENGR**IT** **EFFGLK**DDEI **PAVRLIQLAE**

321 **DMSKYKPESL** DLETATIKKF **VQDFLDG**KLK **PHLMS**EDVPD **DWDAKPV**KVL VGKNFKEVAM DSKAVFVEF YAPWCGHCK**Q**

401 **LAPIWDELGE** KYKDSKDIV AK<sup>423</sup>**MDATANEI** **EEVKVQS**FPT **LKYFPK**DSEE AVDYNGERTL **DAFIK**FLESG GTGAGVVPED

481 EEEEEDEGD DEDLPDEL

### Supporting Peptides:

| Peptide              | Uniq | -10lgP | Mass      | Length | ppm  | m/z      | z | RT    | Fraction | Scan      | Source File          | Area<br>ebraus | Area<br>judaeus | #Feature | #Feature<br>ebraus | #Feature<br>judaeus | Start | End | PTM | AScore | Found<br>By |
|----------------------|------|--------|-----------|--------|------|----------|---|-------|----------|-----------|----------------------|----------------|-----------------|----------|--------------------|---------------------|-------|-----|-----|--------|-------------|
| R_ENQLPLVVFTOESAOK.I | N    | 122.23 | 1958.9949 | 17     | -2.6 | 654.0012 | 3 | 51.77 | 2        | F2:121715 | 20210611-09_2021021- | 0              | 0               | 0        | 0                  | 0                   | 231   | 247 |     |        | PEAKS       |

**total 33 peptides**





| Peptide                       | Uniq | -10lgP | Mass      | Length | ppm  | m/z      | z | RT    | Fraction | Scan      | Source File                                | Area ebraeus | Area judaeus | #Feature | #Feature ebraeus | #Feature judaeus | Start | End | PTM | AScore                     | Found By |
|-------------------------------|------|--------|-----------|--------|------|----------|---|-------|----------|-----------|--------------------------------------------|--------------|--------------|----------|------------------|------------------|-------|-----|-----|----------------------------|----------|
| K.Q(-17.03)LAPIWDELGEK.Y      | N    | 95.23  | 1380.6925 | 12     | -1.5 | 691.3496 | 2 | 59.13 | 2        | F2:131431 | 20210611-09_2021021-OK160A_816_5.3.236.mgf | 0            | 0            | 0        | 0                | 0                | 400   | 411 |     | Q1:Pyro-glu from Q:1000.00 | PEAKS DB |
| R.LIQLAEDM(+15.99)SK.Y        | N    | 94.94  | 1162.5903 | 10     | 1.4  | 582.3008 | 2 | 26.69 | 2        | F2:77509  | 20210611-09_2021021-OK160A_816_5.3.236.mgf | 0            | 0            | 0        | 0                | 0                | 315   | 324 |     | M8:Oxidation (M):1000.00   | PEAKS DB |
| K.DQUESTGALAFK.K              | N    | 94.65  | 1165.5615 | 11     | 4.3  | 583.7881 | 2 | 28.45 | 2        | F2:80728  | 20210611-09_2021021-OK160A_816_5.3.236.mgf | 0            | 0            | 0        | 0                | 0                | 163   | 173 |     |                            | PEAKS DB |
| K.YKPESLDLETATIK.K            | N    | 92.19  | 1606.8453 | 14     | -0.3 | 536.6202 | 3 | 34.14 | 1        | F1:30794  | 20210611-08_2021021-OK192A_815_5.3.236.mgf | 0            |              | 0        | 0                | 0                | 325   | 338 |     |                            | PEAKS DB |
| R.QAADIVNWLK.K                | N    | 90.48  | 1156.6240 | 10     | 2.2  | 579.3184 | 2 | 45.94 | 1        | F1:44192  | 20210611-08_2021021-OK192A_815_5.3.236.mgf | 0            |              | 0        | 0                | 0                | 121   | 130 |     |                            | PEAKS DB |
| K.NHILLFLK.K                  | N    | 86.51  | 996.6120  | 8      | 3.6  | 499.3132 | 2 | 39.74 | 1        | F1:37317  | 20210611-08_2021021-OK192A_815_5.3.236.mgf | 0            | 0            | 0        | 0                | 0                | 255   | 262 |     |                            | PEAKS DB |
| R.E(-18.01)NQLPLVVEFTQESAQK.I | N    | 86.27  | 1940.9843 | 17     | -6.1 | 971.4894 | 2 | 58.57 | 2        | F2:130865 | 20210611-09_2021021-OK160A_816_5.3.236.mgf |              | 0            | 0        | 0                | 0                | 231   | 247 |     | E1:Pyro-glu from E:1000.00 | PEAKS DB |
| K.QLAPIWDELGEK.Y              | N    | 82.76  | 1397.7190 | 12     | 0.5  | 699.8645 | 2 | 48.72 | 1        | F1:46550  | 20210611-08_2021021-OK192A_815_5.3.236.mgf | 0            | 0            | 0        | 0                | 0                | 400   | 411 |     |                            | PEAKS DB |
| K.FVQDFLDGK.L                 | N    | 79.93  | 1067.5287 | 9      | 1.0  | 534.7699 | 2 | 37.97 | 2        | F2:97970  | 20210611-09_2021021-OK160A_816_5.3.236.mgf | 0            | 0            | 0        | 0                | 0                | 340   | 348 |     |                            | PEAKS DB |
| K.NHILLFLKK.E                 | N    | 79.31  | 1124.7069 | 9      | 5.4  | 375.9102 | 3 | 30.94 | 1        | F1:26438  | 20210611-08_2021021-OK192A_815_5.3.236.mgf | 0            | 0            | 0        | 0                | 0                | 255   | 263 |     |                            | PEAKS DB |
| K.VQSFPTLK.Y                  | N    | 75.55  | 918.5175  | 8      | 3.7  | 460.2658 | 2 | 29.78 | 2        | F2:82955  | 20210611-09_2021021-OK160A_816_5.3.236.mgf | 0            | 0            | 0        | 0                | 0                | 435   | 442 |     |                            | PEAKS DB |
| K.EKPDGPADYNGGR.Q             | N    | 73.49  | 1374.6163 | 13     | -1.1 | 688.3121 | 2 | 13.78 | 1        | F1:5004   | 20210611-08_2021021-OK192A_815_5.3.236.mgf | 0            |              | 0        | 0                | 0                | 108   | 120 |     |                            | PEAKS DB |
| K.DDEIPAVR.L                  | N    | 71.69  | 913.4504  | 8      | 0.8  | 457.7310 | 2 | 24.89 | 2        | F2:74398  | 20210611-09_2021021-OK160A_816_5.3.236.mgf | 0            | 0            | 0        | 0                | 0                | 307   | 314 |     |                            | PEAKS DB |
| R.ITEFFGLK.D                  | N    | 66.91  | 953.5222  | 8      | 0.9  | 477.7668 | 2 | 42.32 | 2        | F2:105336 | 20210611-09_2021021-OK160A_816_5.3.236.mgf | 0            | 0            | 0        | 0                | 0                | 299   | 306 |     |                            | PEAKS DB |
| K.ALAPAYAK.A                  | N    | 62.34  | 861.4596  | 8      | 3.5  | 431.7368 | 2 | 19.50 | 2        | F2:65275  | 20210611-09_2021021-OK160A_816_5.3.236.mgf | 0            | 0            | 0        | 0                | 0                | 58    | 65  |     |                            | PEAKS DB |
| R.TLDAFIK.F                   | N    | 61.58  | 806.4538  | 7      | 2.3  | 404.2336 | 2 | 33.58 | 1        | F1:29977  | 20210611-08_2021021-OK192A_815_5.3.236.mgf | 0            |              | 0        | 0                | 0                | 459   | 465 |     |                            | PEAKS DB |
| K.AATTEEEKLNVK.L              | N    | 59.94  | 1444.7773 | 13     | -0.8 | 482.5975 | 3 | 24.76 | 1        | F1:17934  | 20210611-08_2021021-OK192A_815_5.3.236.mgf | 0            |              | 0        | 0                | 0                | 66    | 78  |     |                            | PEAKS DB |
| K.EGGEDTIEK.F                 | N    | 59.47  | 976.4349  | 9      | 3.4  | 489.2243 | 2 | 12.93 | 2        | F2:56083  | 20210611-09_2021021-OK160A_816_5.3.236.mgf |              | 0            | 0        | 0                | 0                | 264   | 272 |     |                            | PEAKS DB |
| K.IFGGEVK.N                   | N    | 59.09  | 748.4119  | 7      | 4.2  | 375.2134 | 2 | 21.69 | 1        | F1:13485  | 20210611-08_2021021-OK192A_815_5.3.236.mgf | 0            | 0            | 0        | 0                | 0                | 248   | 254 |     |                            | PEAKS DB |
| K.DGIVLLK.K                   | N    | 56.48  | 756.4745  | 7      | 0.5  | 379.2433 | 2 | 35.60 | 1        | F1:32687  | 20210611-08_2021021-OK192A_815_5.3.236.mgf | 0            |              | 0        | 0                | 0                | 201   | 207 |     |                            | PEAKS DB |
| K.QEEGVHVLTK.N                | Y    | 56.41  | 1239.6459 | 11     | -1.2 | 620.8271 | 2 | 19.69 | 1        | F1:11068  | 20210611-08_2021021-OK192A_815_5.3.236.mgf | 0            |              | 0        | 0                | 0                | 22    | 32  |     |                            | PEAKS DB |
| total 33 peptides             |      |        |           |        |      |          |   |       |          |           |                                            |              |              |          |                  |                  |       |     |     |                            |          |

P\_145\_Actin

[back to list](#)

| [Protein Coverage](#) | [Supporting Peptides](#) |

Protein Coverage:

|     |            |            |            |             |            |            |            |            |            |                        |        |       |      |         |  |  |  |  |  |  |
|-----|------------|------------|------------|-------------|------------|------------|------------|------------|------------|------------------------|--------|-------|------|---------|--|--|--|--|--|--|
| 1   | DPLFRQRRHK | GPAVGRLLFR | LFLPPVFQEL | ADYYSLTFTNM | CDDEVAALVV | DNGSGMCK   | AG         | FAGDDAPRAV | FPSIVGRPRH | Oxidation (M) (+15.99) |        |       |      |         |  |  |  |  |  |  |
|     |            |            |            |             |            |            |            |            |            |                        |        |       |      |         |  |  |  |  |  |  |
| 81  | QGVVMGMGQK | DSYVGDEAQS | KRGILTLKYP | IEHGIVTNWD  | DMEKIWHHTF | YNELRVAPEE | HPVLLTEAPL | NPKANREKMT |            |                        |        |       |      |         |  |  |  |  |  |  |
|     |            |            |            |             |            |            |            |            |            |                        |        |       |      |         |  |  |  |  |  |  |
| 161 | QIMFETFNSP | AMYVAIQAVL | SLYASGR    | TTG         | IVLDSGDGVT | HTVPIYEGYA | LPHAIMR    | LDL        | AGR        | DLTDYLM                | KILTER | GYSE  |      |         |  |  |  |  |  |  |
|     |            |            |            |             |            |            |            |            |            |                        |        |       |      |         |  |  |  |  |  |  |
| 241 | TTTAER     | IEIVR      | DIKEKLCYVA | LDFEQEMQTA  | STSSSLEK   | SY         | ELPDGQVITI | GNER       | FRCP       | EA                     | LFQPS  | FLGME | SAGH | THETTYN |  |  |  |  |  |  |
|     |            |            |            |             |            |            |            |            |            |                        |        |       |      |         |  |  |  |  |  |  |
| 321 | SIMKCDVDIR | KDL        | YANTVLS    | GGSTMYPGIA  | DRMQK      | EITAL      | APPTMKIKII | APPER      | KYSVW      | IGGSILASLS             | TFQQM  | WISKQ |      |         |  |  |  |  |  |  |
|     |            |            |            |             |            |            |            |            |            |                        |        |       |      |         |  |  |  |  |  |  |
| 401 | EYDESGPSIV | HR         | KCF        | LGTVE       | AKPGHIFRRT | RRWLHLESVA | LKTNYFCSES | MEMFFISLEV | HCFHVINMPI | SNGCIIFDFF             |        |       |      |         |  |  |  |  |  |  |
|     |            |            |            |             |            |            |            |            |            |                        |        |       |      |         |  |  |  |  |  |  |
| 481 | YAGNK      |            |            |             |            |            |            |            |            |                        |        |       |      |         |  |  |  |  |  |  |

Supporting Peptides:

| Peptide                                     | Uniq | -10lgP | Mass      | Length | ppm  | m/z       | z | RT    | Fraction | Scan      | Source File                                | Area ebraeus | Area judaeus | #Feature | #Feature ebraeus | #Feature judaeus | Start | End | PTM           | AScore                     | Fou B  |
|---------------------------------------------|------|--------|-----------|--------|------|-----------|---|-------|----------|-----------|--------------------------------------------|--------------|--------------|----------|------------------|------------------|-------|-----|---------------|----------------------------|--------|
| K.SYELPDGQVITIGNER.F                        | Y    | 149.39 | 1789.8846 | 16     | -1.7 | 895.9443  | 2 | 45.37 | 2        | F2:111319 | 20210611-09_2021021-OK160A_816_5.3.236.mgf | 0            | 0            | 0        | 0                | 0                | 279   | 294 |               |                            | PEA DI |
| K.DLYANTVLSGGSTMYPGIADR.M                   | Y    | 148.28 | 2200.0469 | 21     | 9.6  | 1101.0366 | 2 | 49.26 | 2        | F2:117636 | 20210611-09_2021021-OK160A_816_5.3.236.mgf | 0            | 0            | 0        | 0                | 0                | 332   | 352 |               |                            | PEA DI |
| K.DLYANTVLSGGSTM(+15.99)YPGIADR.M           | Y    | 128.96 | 2216.0420 | 21     | 8.1  | 1109.0331 | 2 | 45.34 | 1        | F1:43445  | 20210611-08_2021021-OK192A_815_5.3.236.mgf | 0            | 0            | 0        | 0                | 0                | 332   | 352 | Oxidation (M) | M14:Oxidation (M):1000.00  | PEA DI |
| K.QEYDESGPSIVHR.K                           | Y    | 119.30 | 1515.6953 | 13     | -0.8 | 758.8511  | 2 | 22.48 | 2        | F2:70248  | 20210611-09_2021021-OK160A_816_5.3.236.mgf | 0            | 0            | 0        | 0                | 0                | 400   | 412 |               |                            | PEA DI |
| R.VAPEHEPVLLEAPLNPK.A                       | Y    | 119.08 | 1953.0570 | 18     | 3.7  | 652.0259  | 3 | 37.81 | 2        | F2:97467  | 20210611-09_2021021-OK160A_816_5.3.236.mgf | 0            | 0            | 0        | 0                | 0                | 136   | 153 |               |                            | PEA DI |
| R.TTGIVLDSGDGVHTHTVPIYEGYALPHAIM(+15.99)R.L | Y    | 117.86 | 3198.6018 | 30     | 0.9  | 800.6551  | 4 | 47.63 | 2        | F2:114753 | 20210611-09_2021021-OK160A_816_5.3.236.mgf |              | 0            | 0        | 0                | 0                | 188   | 217 |               | M29:Oxidation (M):1000.00  | PEA DI |
| R.HQGVMMGGMQK.D                             | Y    | 110.56 | 1170.5638 | 11     | 0.3  | 586.2872  | 2 | 18.09 | 1        | F1:9417   | 20210611-08_2021021-OK192A_815_5.3.236.mgf | 0            | 0            | 0        | 0                | 0                | 80    | 90  |               |                            | PEA DI |
| K.DSYVGDEAQSK.R                             | Y    | 107.14 | 1197.5149 | 11     | 0.1  | 599.7623  | 2 | 16.16 | 2        | F2:60394  | 20210611-09_2021021-OK160A_816_5.3.236.mgf | 0            | 0            | 0        | 0                | 0                | 91    | 101 |               |                            | PEA DI |
| R.GYSFTTTAER.E                              | Y    | 106.28 | 1131.5197 | 10     | 4.2  | 566.7671  | 2 | 25.23 | 2        | F2:75101  | 20210611-09_2021021-OK160A_816_5.3.236.mgf | 0            | 0            | 0        | 0                | 0                | 237   | 246 |               |                            | PEA DI |
| K.Q(-17.03)EYDESGPSIVHR.K                   | Y    | 103.01 | 1498.6688 | 13     | 1.1  | 750.3394  | 2 | 28.64 | 2        | F2:81266  | 20210611-09_2021021-OK160A_816_5.3.236.mgf | 0            | 0            | 0        | 0                | 0                | 400   | 412 |               | Q1:Pyro-glu from Q:1000.00 | PEA DI |
| R.TTGIVLDSGDGVHTHTVPIYEGYALPHAIMR.L         | Y    | 100.28 | 3182.6069 | 30     | -1.0 | 796.6549  | 4 | 50.51 | 2        | F2:119802 | 20210611-09_2021021-OK160A_816_5.3.236.mgf |              | 0            | 0        | 0                | 0                | 188   | 217 |               |                            | PEA DI |
| R.HQGVMM(+15.99)VGMGQK.D                    | Y    | 96.88  | 1186.5587 | 11     | 1.2  | 594.2851  | 2 | 14.84 | 1        | F1:6000   | 20210611-08_2021021-OK192A_815_5.3.236.mgf | 0            | 0            | 0        | 0                | 0                | 80    | 90  | Oxidation (M) | M5:Oxidation (M):62.26     | PEA DI |
| R.HQGVMMGM(+15.99)GQK.D                     | Y    | 90.04  | 1186.5587 | 11     | -2.1 | 594.2829  | 2 | 12.35 | 2        | F2:55322  | 20210611-09_2021021-OK160A_816_5.3.236.mgf | 0            | 0            | 0        | 0                | 0                | 80    | 90  |               | M8:Oxidation (M):32.69     | PEA DI |
| R.AVFPSIVGRPR.H                             | Y    | 88.53  | 1197.6981 | 11     | 1.6  | 599.8548  | 2 | 32.67 | 2        | F2:88257  | 20210611-09_2021021-OK160A_816_5.3.236.mgf | 0            | 0            | 0        | 0                | 0                | 69    | 79  |               |                            | PEA DI |
| K.ETALAPPTMK.I                              | Y    | 86.49  | 1170.6318 | 11     | 0.7  | 586.3212  | 2 | 35.31 | 2        | F2:93027  | 20210611-09_2021021-OK160A_816_5.3.236.mgf | 0            | 0            | 0        | 0                | 0                | 356   | 366 |               |                            | PEA DI |
| K.AGFAGDDAPRA                               | Y    | 85.75  | 975.4410  | 10     | 2.6  | 488.7272  | 2 | 18.67 | 1        | F1:9951   | 20210611-08_2021021-OK192A_815_5.3.236.mgf | 0            | 0            | 0        | 0                | 0                | 59    | 68  |               |                            | PEA DI |
| K.IWHHTFYNELR.V                             | Y    | 83.00  | 1514.7418 | 11     | 3.8  | 505.9212  | 3 | 28.52 | 1        | F1:23270  | 20210611-08_2021021-OK192A_815_5.3.236.mgf | 0            | 0            | 0        | 0                | 0                | 125   | 135 |               |                            | PEA DI |
| R.DLTDYLMK.I                                | Y    | 81.70  | 997.4790  | 8      | -1.1 | 499.7441  | 2 | 43.74 | 2        | F2:107943 | 20210611-09_2021021-OK160A_816_5.3.236.mgf | 0            | 0            | 0        | 0                | 0                | 224   | 231 |               |                            | PEA DI |

total 22 peptides

| Peptide                         | Uniq | -10lgP | Mass      | Length | ppm  | m/z      | z | RT    | Fraction | Scan     | Source File                                | Area ebraeus | Area judaeus | #Feature | #Feature ebraeus | #Feature judaeus | Start | End | PTM | AScore                                               | Four B |
|---------------------------------|------|--------|-----------|--------|------|----------|---|-------|----------|----------|--------------------------------------------|--------------|--------------|----------|------------------|------------------|-------|-----|-----|------------------------------------------------------|--------|
| R.HQGVM(+15.99)VGM(+15.99)GQK.D | Y    | 74.72  | 1202.5536 | 11     | -0.2 | 602.2817 | 2 | 10.25 | 1        | F1:1455  | 20210611-08_2021021-OK192A_815_5.3.236.mgf | 0            | 0            | 0        | 0                | 0                | 80    | 90  |     | M5:Oxidation (M):10 00.00; M8:Oxidation (M):10 00.00 | PEA DE |
| K.YP(+13.98)IEHGIVTNWDDMEK.I    | Y    | 68.74  | 1959.8673 | 16     | 13.2 | 654.3026 | 3 | 40.68 | 1        | F1:38400 | 20210611-08_2021021-OK192A_815_5.3.236.mgf | 0            |              | 0        | 0                | 0                | 109   | 124 |     | P2:Proline oxidation to pyroglutamic acid:100 0.00   | PEA DE |
| K.IIAPPER.K                     | Y    | 64.70  | 794.4650  | 7      | 5.1  | 398.2401 | 2 | 20.32 | 2        | F2:66482 | 20210611-09_2021021-OK160A_816_5.3.236.mgf | 0            | 0            | 0        | 0                | 0                | 369   | 375 |     |                                                      | PEA DE |
| R.DLTDYLM(+15.99)K.I            | Y    | 61.39  | 1013.4739 | 8      | -2.0 | 507.7413 | 2 | 37.02 | 1        | F1:34442 | 20210611-08_2021021-OK192A_815_5.3.236.mgf | 0            |              | 0        | 0                | 0                | 224   | 231 |     | M7:Oxidation (M):10 00.00                            | PEA DE |

total 22 peptides

OK212\_J\_286\_Conopirin

[back to list](#)

[Protein Coverage](#) | [Supporting Peptides](#) |

Protein Coverage:

1

MRVPFPALKT MVTVFLLLMG NMSPVVPRSS TPLHKVKVLA YKVVTPGNSL NGVTIQDLAA TNYKVTCTVIQ VENVTRYPLI

67

8

C

81

APRLRIANDG AATTSPVAIL PGKREAFADR KASNVKGVY GTVSWELLGA RRRFVIMWSA PYSFNKYSNW MGLGMTRERGL

151

8

C

161

MDVAPDNTWF NQMYYGSSSG NLNFKRKKEYFY YNTDPFFIYSN EKFEAEGDMT NGHHAQVRVI IRPTRNNWED LADEIRQNMV

151

8

C

Carbamidomethylation (+57.02)

Oxidation (M) (+15.99)

Supporting Peptides:

| Peptide                         | Uniq | -10lgP | Mass      | Length | ppm  | m/z       | z | RT    | Fraction | Scan      | Source File                                | Area ebraeus | Area judaeus | #Feature | #Feature ebraeus | #Feature judaeus | Start | End | PTM                  | AScore                                               | Four B |
|---------------------------------|------|--------|-----------|--------|------|-----------|---|-------|----------|-----------|--------------------------------------------|--------------|--------------|----------|------------------|------------------|-------|-----|----------------------|------------------------------------------------------|--------|
| K.VVTPGNSLNGVTIQDLAATNYK.V      | N    | 159.55 | 2274.1855 | 22     | 12.3 | 1138.1093 | 2 | 47.99 | 2        | F2:115425 | 20210611-09_2021021-OK160A_816_5.3.236.mgf |              | 0            | 0        | 0                | 0                | 43    | 64  |                      |                                                      | PEA DE |
| R.IANDGAATTSPVAILPGK.R          | Y    | 134.75 | 1694.9203 | 18     | -0.1 | 848.4637  | 2 | 37.25 | 2        | F2:96503  | 20210611-09_2021021-OK160A_816_5.3.236.mgf |              | 0            | 0        | 0                | 0                | 86    | 103 |                      |                                                      | PEA DE |
| R.IANDGAATTSPVAILPGK.E          | Y    | 119.82 | 1851.0214 | 19     | 3.1  | 618.0137  | 3 | 32.78 | 2        | F2:88130  | 20210611-09_2021021-OK160A_816_5.3.236.mgf |              | 0            | 0        | 0                | 0                | 86    | 104 |                      |                                                      | PEA DE |
| K.FEAEGDMTNGHHAQVR.V            | N    | 118.42 | 1797.7853 | 16     | 2.2  | 600.2678  | 3 | 18.47 | 2        | F2:63606  | 20210611-09_2021021-OK160A_816_5.3.236.mgf |              | 0            | 0        | 0                | 0                | 203   | 218 |                      |                                                      | PEA DE |
| K.VTC(+57.02)VIQVENWTR.Y        | N    | 117.26 | 1503.7504 | 12     | 0.3  | 752.8795  | 2 | 40.90 | 2        | F2:103099 | 20210611-09_2021021-OK160A_816_5.3.236.mgf |              | 0            | 0        | 0                | 0                | 65    | 76  | Carbamidomethylation | C3:Carbamidomethylation:1 000.00                     | PEA DE |
| K.EFYNTDPFIYSNEK.F              | N    | 116.83 | 1928.8468 | 15     | 1.6  | 965.4282  | 2 | 46.01 | 2        | F2:112287 | 20210611-09_2021021-OK160A_816_5.3.236.mgf |              | 0            | 0        | 0                | 0                | 188   | 202 |                      |                                                      | PEA DE |
| R.KGVYGTVSWELLGAR.R             | N    | 113.88 | 1634.8781 | 15     | -1.9 | 545.9633  | 3 | 44.01 | 2        | F2:108515 | 20210611-09_2021021-OK160A_816_5.3.236.mgf |              | 0            | 0        | 0                | 0                | 117   | 131 |                      |                                                      | PEA DE |
| K.GVYGTVSWELLGAR.R              | N    | 109.86 | 1506.7831 | 14     | -0.7 | 754.3951  | 2 | 50.27 | 2        | F2:119430 | 20210611-09_2021021-OK160A_816_5.3.236.mgf |              | 0            | 0        | 0                | 0                | 118   | 131 |                      |                                                      | PEA DE |
| K.FEAEGDM(+15.99)TNGHHAQVR.V    | N    | 104.09 | 1813.7802 | 16     | -0.5 | 605.5978  | 3 | 13.73 | 2        | F2:57220  | 20210611-09_2021021-OK160A_816_5.3.236.mgf |              | 0            | 0        | 0                | 0                | 203   | 218 |                      | M7:Oxidation (M):10 00.00                            | PEA DE |
| R.NNWEDLADEIR.Q                 | N    | 99.52  | 1373.6211 | 11     | 0.4  | 687.8152  | 2 | 45.04 | 2        | F2:110772 | 20210611-09_2021021-OK160A_816_5.3.236.mgf |              | 0            | 0        | 0                | 0                | 226   | 236 |                      |                                                      | PEA DE |
| R.KEYFYNTDPFIYSNEK.F            | N    | 96.57  | 2056.9417 | 16     | 2.0  | 686.6530  | 3 | 40.01 | 2        | F2:101239 | 20210611-09_2021021-OK160A_816_5.3.236.mgf |              | 0            | 0        | 0                | 0                | 187   | 202 |                      |                                                      | PEA DE |
| R.YPLIAPR.L                     | N    | 89.94  | 828.4857  | 7      | 3.7  | 415.2499  | 2 | 29.51 | 2        | F2:82428  | 20210611-09_2021021-OK160A_816_5.3.236.mgf |              | 0            | 0        | 0                | 0                | 77    | 83  |                      |                                                      | PEA DE |
| K.YSNWM(+15.99)GLGM(+15.99)TR.E | N    | 88.85  | 1346.5747 | 11     | 1.8  | 674.2933  | 2 | 30.49 | 1        | F1:25789  | 20210611-08_2021021-OK192A_815_5.3.236.mgf | 0            | 0            | 0        | 0                | 0                | 147   | 157 | Oxidation (M)        | M5:Oxidation (M):10 00.00; M9:Oxidation (M):10 00.00 | PEA DE |
| K.YSNWMGLGMTR.E                 | N    | 84.79  | 1314.5850 | 11     | -0.4 | 658.2970  | 2 | 42.62 | 1        | F1:40524  | 20210611-08_2021021-OK192A_815_5.3.236.mgf | 0            | 0            | 0        | 0                | 0                | 147   | 157 |                      |                                                      | PEA DE |
| K.YSNWM(+15.99)GLGMTR.E         | N    | 80.81  | 1330.5798 | 11     | 5.0  | 666.2980  | 2 | 35.70 | 1        | F1:32686  | 20210611-08_2021021-OK192A_815_5.3.236.mgf | 0            | 0            | 0        | 0                | 0                | 147   | 157 | Oxidation (M)        | M5:Oxidation (M):55. 36                              | PEA DE |
| K.YSNWMGLGM(+15.99)TR.E         | N    | 80.30  | 1330.5798 | 11     | 4.5  | 666.2974  | 2 | 37.39 | 2        | F2:96896  | 20210611-09_2021021-OK160A_816_5.3.236.mgf | 0            | 0            | 0        | 0                | 0                | 147   | 157 |                      | M9:Oxidation (M):41. 04                              | PEA DE |

total 16 peptides

CebrOK033\_J\_240\_Conopirin

[back to list](#)

[Protein Coverage](#) | [Supporting Peptides](#) |

Protein Coverage:

1

MRVPFPALKT MVTVFLLLMG NMSPVVPRSS TPLHKVKVLA YKVVTPGNSL NGVTIQDLAA TNYKVTCTVIQ VENVTRYPLI

67

8

C

81

APRLRIAKDG AVTTSPVAIL PGKREAFADR KASYVRKGVY GTVSWELLGA RRRFVIMWSA PYSFNKYSNW MGLGMTRERGL

151

8

C

161

MDVAPDNTWF NQMYYGSSSG NLTFKRRKEYFY YNTDPFFIYSN EKFEAEGDMT NGHHAQVRVI IRPTRNNWED LADEIRQNMV

151

8

C

Carbamidomethylation (+57.02)

Oxidation (M) (+15.99)

Supporting Peptides:

| Peptide                    | Uniq | -10lgP | Mass      | Length | ppm  | m/z       | z | RT    | Fraction | Scan      | Source File                                | Area ebraeus | Area judaeus | #Feature | #Feature ebraeus | #Feature judaeus | Start | End | PTM                  | AScore                           | Four B |
|----------------------------|------|--------|-----------|--------|------|-----------|---|-------|----------|-----------|--------------------------------------------|--------------|--------------|----------|------------------|------------------|-------|-----|----------------------|----------------------------------|--------|
| K.VVTPGNSLNGVTIQDLAATNYK.V | N    | 159.55 | 2274.1855 | 22     | 12.3 | 1138.1093 | 2 | 47.99 | 2        | F2:115425 | 20210611-09_2021021-OK160A_816_5.3.236.mgf |              | 0            | 0        | 0                | 0                | 43    | 64  |                      |                                  | PEA DE |
| K.DGAVTTPSPVAILPGK.R       | Y    | 123.00 | 1424.7875 | 15     | 0.7  | 713.3985  | 2 | 41.62 | 2        | F2:104154 | 20210611-09_2021021-OK160A_816_5.3.236.mgf |              | 0            | 0        | 0                | 0                | 89    | 103 |                      |                                  | PEA DE |
| K.DGAVTTPSPVAILPGK.E       | Y    | 121.42 | 1580.8885 | 16     | 0.3  | 791.4485  | 2 | 34.49 | 2        | F2:91442  | 20210611-09_2021021-OK160A_816_5.3.236.mgf |              | 0            | 0        | 0                | 0                | 89    | 104 |                      |                                  | PEA DE |
| K.FEAEGDMTNGHHAQVR.V       | N    | 118.42 | 1797.7853 | 16     | 2.2  | 600.2678  | 3 | 18.47 | 2        | F2:63606  | 20210611-09_2021021-OK160A_816_5.3.236.mgf |              | 0            | 0        | 0                | 0                | 203   | 218 |                      |                                  | PEA DE |
| K.VTC(+57.02)VIQVENWTR.Y   | N    | 117.26 | 1503.7504 | 12     | 0.3  | 752.8795  | 2 | 40.90 | 2        | F2:103099 | 20210611-09_2021021-OK160A_816_5.3.236.mgf |              | 0            | 0        | 0                | 0                | 65    | 76  | Carbamidomethylation | C3:Carbamidomethylation:1 000.00 | PEA DE |
| K.EFYNTDPFIYSNEK.F         | N    | 116.83 | 1928.8468 | 15     | 1.6  | 965.4282  | 2 | 46.01 | 2        | F2:112287 | 20210611-09_2021021-OK160A_816_5.3.236.mgf |              | 0            | 0        | 0                | 0                | 188   | 202 |                      |                                  | PEA DE |
| R.KGVYGTVSWELLGAR.R        | N    | 113.88 | 1634.8781 | 15     | -1.9 | 545.9633  | 3 | 44.01 | 2        | F2:108515 | 20210611-09_2021021-OK160A_816_5.3.236.mgf |              | 0            | 0        | 0                | 0                | 117   | 131 |                      |                                  | PEA DE |

total 16 peptides

| Peptide                         | Uniq | -10lgP | Mass      | Length | ppm  | m/z      | z | RT    | Fraction | Scan      | Source File                                | Area ebraeus | Area judaeus | #Feature | #Feature ebraeus | #Feature judaeus | Start | End | PTM           | AScore                                               | Found By |
|---------------------------------|------|--------|-----------|--------|------|----------|---|-------|----------|-----------|--------------------------------------------|--------------|--------------|----------|------------------|------------------|-------|-----|---------------|------------------------------------------------------|----------|
| K.GVYGTVSWELLGAR.R              | N    | 109.86 | 1506.7831 | 14     | -0.7 | 754.3951 | 2 | 50.27 | 2        | F2:119430 | 20210611-09_2021021-OK160A_816_5.3.236.mgf |              | 0            | 0        | 0                | 0                | 118   | 131 |               |                                                      | PEAIDE   |
| K.FEAEGDM(+15.99)TNGHHAQVR.V    | N    | 104.09 | 1813.7802 | 16     | -0.5 | 605.5978 | 3 | 13.73 | 2        | F2:57220  | 20210611-09_2021021-OK160A_816_5.3.236.mgf |              | 0            | 0        | 0                | 0                | 203   | 218 |               | M7:Oxidation (M):10 00.00                            | PEAIDE   |
| R.NNWEDLADEIR.Q                 | N    | 99.52  | 1373.6211 | 11     | 0.4  | 687.8152 | 2 | 45.04 | 2        | F2:110772 | 20210611-09_2021021-OK160A_816_5.3.236.mgf |              | 0            | 0        | 0                | 0                | 226   | 236 |               |                                                      | PEAIDE   |
| R.KEYFYNTDPFIYSNEK.F            | N    | 96.57  | 2056.9417 | 16     | 2.0  | 686.6530 | 3 | 40.01 | 2        | F2:101239 | 20210611-09_2021021-OK160A_816_5.3.236.mgf |              | 0            | 0        | 0                | 0                | 187   | 202 |               |                                                      | PEAIDE   |
| R.YPLIAPR.L                     | N    | 89.94  | 828.4857  | 7      | 3.7  | 415.2499 | 2 | 29.51 | 2        | F2:82428  | 20210611-09_2021021-OK160A_816_5.3.236.mgf |              | 0            | 0        | 0                | 0                | 77    | 83  |               |                                                      | PEAIDE   |
| K.YSNWM(+15.99)GLGM(+15.99)TR.E | N    | 88.85  | 1346.5747 | 11     | 1.8  | 674.2933 | 2 | 30.49 | 1        | F1:25789  | 20210611-08_2021021-OK192A_815_5.3.236.mgf | 0            | 0            | 0        | 0                | 0                | 147   | 157 | Oxidation (M) | M5:Oxidation (M):10 00.00; M9:Oxidation (M):10 00.00 | PEAIDE   |
| K.YSNWMGLGMTR.E                 | N    | 84.79  | 1314.5850 | 11     | -0.4 | 658.2970 | 2 | 42.62 | 1        | F1:40524  | 20210611-08_2021021-OK192A_815_5.3.236.mgf | 0            | 0            | 0        | 0                | 0                | 147   | 157 |               |                                                      | PEAIDE   |
| K.YSNWM(+15.99)GLGMTR.E         | N    | 80.81  | 1330.5798 | 11     | 5.0  | 666.2980 | 2 | 35.70 | 1        | F1:32686  | 20210611-08_2021021-OK192A_815_5.3.236.mgf | 0            | 0            | 0        | 0                | 0                | 147   | 157 | Oxidation (M) | M5:Oxidation (M):55. 36                              | PEAIDE   |
| K.YSNWMGLGM(+15.99)TR.E         | N    | 80.30  | 1330.5798 | 11     | 4.5  | 666.2974 | 2 | 37.39 | 2        | F2:96896  | 20210611-09_2021021-OK160A_816_5.3.236.mgf | 0            | 0            | 0        | 0                | 0                | 147   | 157 |               | M9:Oxidation (M):41. 04                              | PEAIDE   |
| total 16 peptides               |      |        |           |        |      |          |   |       |          |           |                                            |              |              |          |                  |                  |       |     |               |                                                      |          |

OK213\_E\_299\_Conoporin

back to list

| Protein Coverage | Supporting Peptides |

Protein Coverage:

1

MRVPFPALKT MVTVFLLMG NMSPVVPRSS IPLDKVKVLA YEVVTSGNSL NGVTLQDLAE TEYDVTCCVVQ VENWTR

YPLM

Oxidation (M) (+15.99)

81

TPRQRIANDG AWTTYPVAIL PGKREAFADR KASGVKKGIV GIVSWELLGA RRRFVIMWSA PYDLNKYSNW MGLGMTREGI

161

TDVAPGDTWF DQMSYDKSSG SLTFRKEFY HNTDPVIYRN AKFEAEGAMT NGNHAQVKIV VRPTRNNWKD LADEIRQKLV

Supporting Peptides:

| Peptide                         | Uniq | -10lgP | Mass      | Length | ppm  | m/z       | z | RT    | Fraction | Scan     | Source File                                | Area ebraeus | Area judaeus | #Feature | #Feature ebraeus | #Feature judaeus | Start | End | PTM           | AScore                                             | Found By |
|---------------------------------|------|--------|-----------|--------|------|-----------|---|-------|----------|----------|--------------------------------------------|--------------|--------------|----------|------------------|------------------|-------|-----|---------------|----------------------------------------------------|----------|
| R.IANDGAWTYPVAILPGK.R           | Y    | 143.54 | 1885.9938 | 18     | 1.6  | 944.0021  | 2 | 50.62 | 1        | F1:47729 | 20210611-08_2021021-OK192A_815_5.3.236.mgf | 0            | 0            | 0        | 0                | 0                | 86    | 103 |               |                                                    | PEAKS DB |
| R.IANDGAWTYPVAILPGK.E           | Y    | 118.82 | 2042.0948 | 19     | -1.1 | 681.7022  | 3 | 45.81 | 1        | F1:44012 | 20210611-08_2021021-OK192A_815_5.3.236.mgf | 0            |              | 0        | 0                | 0                | 86    | 104 |               |                                                    | PEAKS DB |
| K.EFYHNTDPVIYR.N                | Y    | 114.40 | 1552.7310 | 12     | 2.0  | 777.3714  | 2 | 30.56 | 1        | F1:25946 | 20210611-08_2021021-OK192A_815_5.3.236.mgf | 0            |              | 0        | 0                | 0                | 188   | 199 |               |                                                    | PEAKS DB |
| K.FEAEGAMTNGNHAQVK.I            | Y    | 110.64 | 1702.7733 | 16     | 0.6  | 852.3912  | 2 | 20.95 | 1        | F1:12500 | 20210611-08_2021021-OK192A_815_5.3.236.mgf | 0            |              | 0        | 0                | 0                | 203   | 218 |               |                                                    | PEAKS DB |
| R.KEYFYHNTDPVIYR.N              | Y    | 109.38 | 1680.8259 | 13     | -0.4 | 561.2802  | 3 | 25.39 | 1        | F1:18789 | 20210611-08_2021021-OK192A_815_5.3.236.mgf | 0            |              | 0        | 0                | 0                | 187   | 199 |               |                                                    | PEAKS DB |
| R.FVIM(+15.99)WSAPYDLNK.Y       | N    | 105.41 | 1598.7803 | 13     | 0.4  | 800.3947  | 2 | 51.09 | 1        | F1:47971 | 20210611-08_2021021-OK192A_815_5.3.236.mgf | 0            |              | 0        | 0                | 0                | 134   | 146 | Oxidation (M) | M4:Oxidation (M):1000.00                           | PEAKS DB |
| R.FVIMWSAPYDLNK.Y               | N    | 102.70 | 1582.7854 | 13     | -2.0 | 792.3954  | 2 | 54.03 | 1        | F1:49661 | 20210611-08_2021021-OK192A_815_5.3.236.mgf | 0            |              | 0        | 0                | 0                | 134   | 146 |               |                                                    | PEAKS DB |
| K.E(-18.01)FYHNTDPVIYR.N        | Y    | 88.94  | 1534.7205 | 12     | 2.7  | 768.3667  | 2 | 38.67 | 1        | F1:36170 | 20210611-08_2021021-OK192A_815_5.3.236.mgf | 0            |              | 0        | 0                | 0                | 188   | 199 |               | E1:Pyro-glu from E:1000.0 0                        | PEAKS DB |
| K.YSNWM(+15.99)GLGM(+15.99)TR.E | N    | 88.85  | 1346.5747 | 11     | 1.8  | 674.2933  | 2 | 30.49 | 1        | F1:25789 | 20210611-08_2021021-OK192A_815_5.3.236.mgf | 0            | 0            | 0        | 0                | 0                | 147   | 157 | Oxidation (M) | M5:Oxidation (M):1000.00; M9:Oxidation (M):1000.00 | PEAKS DB |
| K.GVYGTVSWELLGAR.R              | Y    | 87.81  | 1518.8195 | 14     | -1.4 | 760.4131  | 2 | 56.52 | 1        | F1:50680 | 20210611-08_2021021-OK192A_815_5.3.236.mgf | 0            |              | 0        | 0                | 0                | 118   | 131 |               |                                                    | PEAKS DB |
| K.KGVYGTVSWELLGAR.R             | Y    | 86.85  | 1646.9144 | 15     | 0.7  | 549.9771  | 3 | 50.31 | 1        | F1:47548 | 20210611-08_2021021-OK192A_815_5.3.236.mgf | 0            |              | 0        | 0                | 0                | 117   | 131 |               |                                                    | PEAKS DB |
| R.EGLTDVAPGDTWFDQMSYDK.S        | Y    | 85.64  | 2273.9785 | 20     | 8.7  | 1138.0021 | 2 | 53.76 | 1        | F1:49528 | 20210611-08_2021021-OK192A_815_5.3.236.mgf | 0            |              | 0        | 0                | 0                | 158   | 177 |               |                                                    | PEAKS DB |
| R.EGLTDVAPGDTWFDQM(+15.99)YSK.S | Y    | 85.13  | 2289.9736 | 20     | 5.9  | 1145.9965 | 2 | 48.12 | 1        | F1:46085 | 20210611-08_2021021-OK192A_815_5.3.236.mgf | 0            |              | 0        | 0                | 0                | 158   | 177 |               | M16:Oxidation (M):1000.0 0                         | PEAKS DB |
| K.YSNWMGLGMTR.E                 | N    | 84.79  | 1314.5850 | 11     | -0.4 | 658.2970  | 2 | 42.62 | 1        | F1:40524 | 20210611-08_2021021-OK192A_815_5.3.236.mgf | 0            | 0            | 0        | 0                | 0                | 147   | 157 |               |                                                    | PEAKS DB |
| K.SSGSLTFR.K                    | Y    | 84.61  | 982.4719  | 9      | 5.0  | 492.2438  | 2 | 23.61 | 1        | F1:16053 | 20210611-08_2021021-OK192A_815_5.3.236.mgf | 0            |              | 0        | 0                | 0                | 178   | 186 |               |                                                    | PEAKS DB |
| K.YSNWM(+15.99)GLGMTR.E         | N    | 80.81  | 1330.5798 | 11     | 5.0  | 666.2980  | 2 | 35.70 | 1        | F1:32686 | 20210611-08_2021021-OK192A_815_5.3.236.mgf | 0            | 0            | 0        | 0                | 0                | 147   | 157 | Oxidation (M) | M5:Oxidation (M):55. 36                            | PEAKS DB |
| K.YSNWMGLGM(+15.99)TR.E         | N    | 80.30  | 1330.5798 | 11     | 4.5  | 666.2974  | 2 | 37.39 | 2        | F2:96896 | 20210611-09_2021021-OK160A_816_5.3.236.mgf | 0            | 0            | 0        | 0                | 0                | 147   | 157 |               | M9:Oxidation (M):41. 04                            | PEAKS DB |
| K.FEAEGAM(+15.99)TNGNHAQVK.I    | Y    | 79.05  | 1718.7682 | 16     | 2.8  | 573.9294  | 3 | 15.91 | 1        | F1:7008  | 20210611-08_2021021-OK192A_815_5.3.236.mgf | 0            |              | 0        | 0                | 0                | 203   | 218 |               | M7:Oxidation (M):1000.00                           | PEAKS DB |
| R.YPLMTPR.Q                     | Y    | 59.21  | 876.4528  | 7      | 1.3  | 439.2326  | 2 | 27.92 | 1        | F1:22536 | 20210611-08_2021021-OK192A_815_5.3.236.mgf | 0            |              | 0        | 0                | 0                | 77    | 83  |               |                                                    | PEAKS DB |
| K.DLADEIR.Q                     | Y    | 57.73  | 830.4133  | 7      | 2.7  | 416.2135  | 2 | 28.49 | 1        | F1:23171 | 20210611-08_2021021-OK192A_815_5.3.236.mgf | 0            |              | 0        | 0                | 0                | 230   | 236 |               |                                                    | PEAKS DB |
| total 20 peptides               |      |        |           |        |      |           |   |       |          |          |                                            |              |              |          |                  |                  |       |     |               |                                                    |          |

OK193\_E\_246\_Conoporin

back to list

| Protein Coverage | Supporting Peptides |

Protein Coverage:

1

MRVPFPALKT MVTVFLLMG NMSPVVPRSS IPLDKVKVLA YEVVTSGNSL NGVTLQDLAE TEYDVTCCVVQ VENWTR

YPLM

Oxidation (M) (+15.99)

81

TPRQRIANDG AWTTYPVAIL PGKREAFADR KASGVKKGIV GIVSWELLGA RRRFVIMWSA PYDLNKYSNW MGLGMTREGI

161

TDVAPGDTWF DQMSYDKSSG SLTFRKEFY HNTDPVIYRN AKFEAEGAMT NGNHAQVKIV VRPTRNNWKD LADEIRQKLV

Supporting Peptides:

| Peptide               | Uniq | -10lgP | Mass      | Length | ppm  | m/z      | z | RT    | Fraction | Scan     | Source File                                | Area ebraeus | Area judaeus | #Feature | #Feature ebraeus | #Feature judaeus | Start | End | PTM | AScore | Found By |
|-----------------------|------|--------|-----------|--------|------|----------|---|-------|----------|----------|--------------------------------------------|--------------|--------------|----------|------------------|------------------|-------|-----|-----|--------|----------|
| R.IANDGAWTYPVAILPGK.R | Y    | 143.54 | 1885.9938 | 18     | 1.6  | 944.0021 | 2 | 50.62 | 1        | F1:47729 | 20210611-08_2021021-OK192A_815_5.3.236.mgf | 0            | 0            | 0        | 0                | 0                | 86    | 103 |     |        | PEAKS DB |
| R.IANDGAWTYPVAILPGK.E | Y    | 118.82 | 2042.0948 | 19     | -1.1 | 681.7022 | 3 | 45.81 | 1        | F1:44012 | 20210611-08_2021021-OK192A_815_5.3.236.mgf | 0            |              | 0        | 0                | 0                | 86    | 104 |     |        | PEAKS DB |
| K.EFYHNTDPVIYR.N      | Y    | 114.40 | 1552.7310 | 12     | 2.0  | 777.3714 | 2 | 30.56 | 1        | F1:25946 | 20210611-08_2021021-OK192A_815_5.3.236.mgf | 0            |              | 0        | 0                | 0                | 188   | 199 |     |        | PEAKS DB |
| K.FEAEGAMTNGNHAQVK.I  | Y    | 110.64 | 1702.7733 | 16     | 0.6  | 852.3912 | 2 | 20.95 | 1        | F1:12500 | 20210611-08_2021021-OK192A_815_5.3.236.mgf | 0            |              | 0        | 0                | 0                | 203   | 218 |     |        | PEAKS DB |
| R.KEYFYHNTDPVIYR.N    | Y    | 109.38 | 1680.8259 | 13     | -0.4 | 561.2802 | 3 | 25.39 | 1        | F1:18789 | 20210611-08_2021021-OK192A_815_5.3.236.mgf | 0            |              | 0        | 0                | 0                | 187   | 199 |     |        | PEAKS DB |

total 20 peptides

| Peptide                          | Uniq | -10lgP | Mass      | Length | ppm  | m/z       | z | RT    | Fraction | Scan     | Source File                                | Area ebraeus | Area judaeus | #Feature | #Feature ebraeus | #Feature judaeus | Start | End | PTM           | AScore                                             | Found By |
|----------------------------------|------|--------|-----------|--------|------|-----------|---|-------|----------|----------|--------------------------------------------|--------------|--------------|----------|------------------|------------------|-------|-----|---------------|----------------------------------------------------|----------|
| R.FVIM(+15.99)WSAPYDLNK.Y        | N    | 105.41 | 1598.7803 | 13     | 0.4  | 800.3947  | 2 | 51.09 | 1        | F1:47971 | 20210611-08_2021021-OK192A_815_5.3.236.mgf | 0            |              | 0        | 0                | 0                | 134   | 146 | Oxidation (M) | M4:Oxidation (M):1000.00                           | PEAKS DB |
| R.FVIMWSAPYDLNK.Y                | N    | 102.70 | 1582.7854 | 13     | -2.0 | 792.3954  | 2 | 54.03 | 1        | F1:49661 | 20210611-08_2021021-OK192A_815_5.3.236.mgf | 0            |              | 0        | 0                | 0                | 134   | 146 |               |                                                    | PEAKS DB |
| K.E(-18.01)FYHNTDPVIYR.N         | Y    | 88.94  | 1534.7205 | 12     | 2.7  | 768.3667  | 2 | 38.67 | 1        | F1:36170 | 20210611-08_2021021-OK192A_815_5.3.236.mgf | 0            |              | 0        | 0                | 0                | 188   | 199 |               | E1:Pyro-glu from E:1000.00                         | PEAKS DB |
| K.YSNWM(+15.99)GLGM(+15.99)TR.E  | N    | 88.85  | 1346.5747 | 11     | 1.8  | 674.2933  | 2 | 30.49 | 1        | F1:25789 | 20210611-08_2021021-OK192A_815_5.3.236.mgf | 0            | 0            | 0        | 0                | 0                | 147   | 157 | Oxidation (M) | M5:Oxidation (M):1000.00; M9:Oxidation (M):1000.00 | PEAKS DB |
| K.GVYGIVSWELLGAR.R               | Y    | 87.81  | 1518.8195 | 14     | -1.4 | 760.4131  | 2 | 56.52 | 1        | F1:50680 | 20210611-08_2021021-OK192A_815_5.3.236.mgf | 0            |              | 0        | 0                | 0                | 118   | 131 |               |                                                    | PEAKS DB |
| K.KGVYGIVSWELLGAR.R              | Y    | 86.85  | 1646.9144 | 15     | 0.7  | 549.9771  | 3 | 50.31 | 1        | F1:47548 | 20210611-08_2021021-OK192A_815_5.3.236.mgf | 0            |              | 0        | 0                | 0                | 117   | 131 |               |                                                    | PEAKS DB |
| R.EGLTDVAPGDTWFDQMYSKD.S         | Y    | 85.64  | 2273.9785 | 20     | 8.7  | 1138.0021 | 2 | 53.76 | 1        | F1:49528 | 20210611-08_2021021-OK192A_815_5.3.236.mgf | 0            |              | 0        | 0                | 0                | 158   | 177 |               |                                                    | PEAKS DB |
| R.EGLTDVAPGDTWFDQM(+15.99)YSDK.S | Y    | 85.13  | 2289.9736 | 20     | 5.9  | 1145.9965 | 2 | 48.12 | 1        | F1:46085 | 20210611-08_2021021-OK192A_815_5.3.236.mgf | 0            |              | 0        | 0                | 0                | 158   | 177 |               | M16:Oxidation (M):1000.00                          | PEAKS DB |
| K.YSNWMLGMTR.E                   | N    | 84.79  | 1314.5850 | 11     | -0.4 | 658.2970  | 2 | 42.62 | 1        | F1:40524 | 20210611-08_2021021-OK192A_815_5.3.236.mgf | 0            | 0            | 0        | 0                | 0                | 147   | 157 |               |                                                    | PEAKS DB |
| K.SSGSLTFR.K                     | Y    | 84.61  | 982.4719  | 9      | 5.0  | 492.2438  | 2 | 23.61 | 1        | F1:16053 | 20210611-08_2021021-OK192A_815_5.3.236.mgf | 0            |              | 0        | 0                | 0                | 178   | 186 |               |                                                    | PEAKS DB |
| K.YSNWM(+15.99)GLGMTR.E          | N    | 80.81  | 1330.5798 | 11     | 5.0  | 666.2980  | 2 | 35.70 | 1        | F1:32686 | 20210611-08_2021021-OK192A_815_5.3.236.mgf | 0            | 0            | 0        | 0                | 0                | 147   | 157 | Oxidation (M) | M5:Oxidation (M):55.36                             | PEAKS DB |
| K.YSNWMLGM(+15.99)TR.E           | N    | 80.30  | 1330.5798 | 11     | 4.5  | 666.2974  | 2 | 37.39 | 2        | F2:96896 | 20210611-09_2021021-OK192A_816_5.3.236.mgf | 0            | 0            | 0        | 0                | 0                | 147   | 157 |               | M9:Oxidation (M):41.04                             | PEAKS DB |
| K.FEAEGAM(+15.99)TNGNHAQVK.I     | Y    | 79.05  | 1718.7682 | 16     | 2.8  | 573.9294  | 3 | 15.91 | 1        | F1:7008  | 20210611-08_2021021-OK192A_815_5.3.236.mgf | 0            |              | 0        | 0                | 0                | 203   | 218 |               | M7:Oxidation (M):1000.00                           | PEAKS DB |
| R.YPLMTPR.Q                      | Y    | 59.21  | 876.4528  | 7      | 1.3  | 439.2326  | 2 | 27.92 | 1        | F1:22536 | 20210611-08_2021021-OK192A_815_5.3.236.mgf | 0            |              | 0        | 0                | 0                | 77    | 83  |               |                                                    | PEAKS DB |
| K.DLADEIR.Q                      | Y    | 57.73  | 830.4133  | 7      | 2.7  | 416.2135  | 2 | 28.49 | 1        | F1:23171 | 20210611-08_2021021-OK192A_815_5.3.236.mgf | 0            |              | 0        | 0                | 0                | 230   | 236 |               |                                                    | PEAKS DB |
| total 20 peptides                |      |        |           |        |      |           |   |       |          |          |                                            |              |              |          |                  |                  |       |     |               |                                                    |          |

CebrOK035\_J\_368\_PDI

[back to list](#)

| [Protein Coverage](#) | [Supporting Peptides](#) |

Protein Coverage:

|     |                                                                                        |                                                         |
|-----|----------------------------------------------------------------------------------------|---------------------------------------------------------|
| 1   | MLLAYFRPSA FTSPATMRRALILFSCIVLAVQASDVLEFTDSNFESKIKELDVALVEFYAPWCGHCKRLAPEYEKAATKL      | <div><div></div><div>Oxidation (M) (+15.99)</div></div> |
| 81  | KTSDPFVPLVKVDCTAETKTQEYGVSGYPTLKIIFKGGELTKDYTGPRENGIISTMLKEAGPVSKLELDFKQYEDFIGR        |                                                         |
| 161 | GTVCVVGFFE DADSEMAKTF SKLADTNEADIRFGHTTASAVMDKAKYKDEIVLFRPKAMQNKFEDSVVKFTGDAKKKSAV     |                                                         |
| 241 | KEFLTQEHLGMCGIRTINNA GDFS KPTFVA FYD VDYVKNPKGSNYWRNRV MKVGKKLRDE GLKVFFGVSNKEEHSHELGE |                                                         |
| 321 | CGLQDAEGDK PIVCAYDEKN RKFKMEEEFVSDFSFEK FVRGVLNGEVEPYLKSEPVPENNDQPVKVVVAKNFEELVNDPEK   |                                                         |
| 401 | DVLIEFYAPWCGHCKSLAPKYDELAELKDETDIVIAKMDATANDPPSQYEVRGFPPTIYFAPKGSKSSPKKYEGGREVND       |                                                         |
| 481 | FIKYLAKKEATDELQGFDRKGGKKGQKQKKKKTTEL                                                   |                                                         |

Supporting Peptides:

| Peptide                      | Uniq | -10lgP | Mass      | Length | ppm  | m/z      | z | RT    | Fraction | Scan      | Source File                                | Area ebraeus | Area judaeus | #Feature | #Feature ebraeus | #Feature judaeus | Start | End | PTM           | AScore                           | Found By |
|------------------------------|------|--------|-----------|--------|------|----------|---|-------|----------|-----------|--------------------------------------------|--------------|--------------|----------|------------------|------------------|-------|-----|---------------|----------------------------------|----------|
| K.M(+15.99)DATANDPPSQYEV.R.G | N    | 116.71 | 1708.7362 | 15     | -0.3 | 855.3715 | 2 | 23.22 | 2        | F2:71559  | 20210611-09_2021021-OK160A_816_5.3.236.mgf |              | 0            | 0        | 0                | 0                | 439   | 453 |               | M1:Oxidation (M):1000.00         | PEAKS DB |
| K.SEPVPENNDQPVK.V            | N    | 112.89 | 1451.6892 | 13     | 2.8  | 726.8509 | 2 | 19.00 | 2        | F2:64401  | 20210611-09_2021021-OK160A_816_5.3.236.mgf | 0            | 0            | 0        | 0                | 0                | 372   | 384 |               |                                  | PEAKS DB |
| R.FGHTTASAVMDK.A             | Y    | 110.21 | 1263.5918 | 12     | 0.4  | 632.8008 | 2 | 19.17 | 2        | F2:64682  | 20210611-09_2021021-OK160A_816_5.3.236.mgf |              | 0            | 0        | 0                | 0                | 193   | 204 |               |                                  | PEAKS DB |
| R.FGHTTASAVM(+15.99)DK.A     | Y    | 110.09 | 1279.5867 | 12     | -4.6 | 640.7950 | 2 | 14.30 | 2        | F2:57824  | 20210611-09_2021021-OK160A_816_5.3.236.mgf |              | 0            | 0        | 0                | 0                | 193   | 204 | Oxidation (M) | M10:Oxidation (M):1000.00        | PEAKS DB |
| K.MDATANDPPSQYEV.R.G         | N    | 106.16 | 1692.7413 | 15     | 0.4  | 847.3748 | 2 | 26.03 | 2        | F2:76318  | 20210611-09_2021021-OK160A_816_5.3.236.mgf |              | 0            | 0        | 0                | 0                | 439   | 453 |               |                                  | PEAKS DB |
| K.EATDELQGFDR.K              | N    | 95.64  | 1279.5680 | 11     | 0.1  | 640.7886 | 2 | 29.87 | 2        | F2:83300  | 20210611-09_2021021-OK160A_816_5.3.236.mgf | 0            | 0            | 0        | 0                | 0                | 488   | 498 |               |                                  | PEAKS DB |
| K.TSDPFPVPLVK.V              | Y    | 89.26  | 1051.5913 | 10     | 2.2  | 526.8019 | 2 | 29.96 | 2        | F2:83364  | 20210611-09_2021021-OK160A_816_5.3.236.mgf | 0            | 0            | 0        | 0                | 0                | 82    | 91  |               |                                  | PEAKS DB |
| R.GFPTIYFAPK.G               | N    | 86.32  | 1139.6014 | 10     | -0.9 | 570.8051 | 2 | 46.08 | 2        | F2:112594 | 20210611-09_2021021-OK160A_816_5.3.236.mgf | 0            | 0            | 0        | 0                | 0                | 454   | 463 |               |                                  | PEAKS DB |
| K.LADTNEADIR.F               | Y    | 85.89  | 1116.5411 | 10     | 5.7  | 559.2787 | 2 | 19.91 | 2        | F2:65906  | 20210611-09_2021021-OK160A_816_5.3.236.mgf |              | 0            | 0        | 0                | 0                | 183   | 192 |               |                                  | PEAKS DB |
| R.GVLNGEVEPYLK.S             | Y    | 82.43  | 1316.6975 | 12     | -0.3 | 659.3531 | 2 | 39.10 | 2        | F2:99793  | 20210611-09_2021021-OK160A_816_5.3.236.mgf |              | 0            | 0        | 0                | 0                | 360   | 371 |               |                                  | PEAKS DB |
| K.LKDETDIVIAK.M              | N    | 82.41  | 1243.7023 | 11     | 0.0  | 622.8558 | 2 | 25.53 | 2        | F2:75618  | 20210611-09_2021021-OK160A_816_5.3.236.mgf |              | 0            | 0        | 0                | 0                | 428   | 438 |               |                                  | PEAKS DB |
| K.YKDEIVLFRPK.A              | N    | 82.19  | 1406.7921 | 11     | -0.6 | 469.9357 | 3 | 31.20 | 2        | F2:85517  | 20210611-09_2021021-OK160A_816_5.3.236.mgf |              | 0            | 0        | 0                | 0                | 207   | 217 |               |                                  | PEAKS DB |
| K.VFFGVSNK.E                 | N    | 77.53  | 896.4756  | 8      | 2.5  | 449.2443 | 2 | 30.55 | 2        | F2:84259  | 20210611-09_2021021-OK160A_816_5.3.236.mgf | 0            | 0            | 0        | 0                | 0                | 304   | 311 |               |                                  | PEAKS DB |
| K.YDELAEK.L                  | N    | 64.80  | 866.4021  | 7      | 4.6  | 434.2085 | 2 | 16.53 | 2        | F2:60959  | 20210611-09_2021021-OK160A_816_5.3.236.mgf |              | 0            | 0        | 0                | 0                | 421   | 427 |               |                                  | PEAKS DB |
| K.QYEDFIGR.G                 | N    | 64.14  | 1026.4771 | 8      | 3.1  | 514.2452 | 2 | 30.02 | 2        | F2:83542  | 20210611-09_2021021-OK160A_816_5.3.236.mgf |              | 0            | 0        | 0                | 0                | 153   | 160 |               |                                  | PEAKS DB |
| K.RLAPEYK.A                  | N    | 61.68  | 1004.5291 | 8      | 1.7  | 503.2705 | 2 | 15.00 | 2        | F2:59037  | 20210611-09_2021021-OK160A_816_5.3.236.mgf |              | 0            | 0        | 0                | 0                | 68    | 75  |               |                                  | PEAKS DB |
| K.FEDSVVK.F                  | Y    | 59.31  | 822.4123  | 7      | 2.4  | 412.2127 | 2 | 20.11 | 2        | F2:66181  | 20210611-09_2021021-OK160A_816_5.3.236.mgf |              | 0            | 0        | 0                | 0                | 223   | 229 |               |                                  | PEAKS DB |
| K.TC(+57.02)QEYGVSGYPTLK.I   | N    | 58.68  | 1601.7395 | 14     | 0.4  | 801.8740 | 2 | 32.78 | 2        | F2:88088  | 20210611-09_2021021-OK160A_816_5.3.236.mgf |              | 0            | 0        | 0                | 0                | 100   | 113 |               | C2:Carbamido methylation:1000.00 | PEAKS DB |
| total 18 peptides            |      |        |           |        |      |          |   |       |          |           |                                            |              |              |          |                  |                  |       |     |               |                                  |          |

OK212\_J\_325\_PDI

[back to list](#)

| [Protein Coverage](#) | [Supporting Peptides](#) |

Protein Coverage:

1 MLLAYFRPSA FTSPATMRRALILFSCIVLA VQASDVLEFT DSNFESKIKE LDVALVEFYA PWC<sup>202</sup>GHCKRLA PEYEKAATKL Oxidation (M) (+15.99)

81 KTS<sup>18</sup>DPFVPLV KVDCTAETKT CQEYGVSGYP TLKIFKGGEL TKDYTGPRE<sup>8</sup>NGIISTMLKE AGPVSKLELD FKQYEDFIGR

161 GTVCVVGFFE DADSEMAKTF SKLADTNEAD IRFGHTTASA VMDKAKYKDE I<sup>18</sup>VLFRPKAMQ NK<sup>8</sup>FEDSVVKF TGDAKKSAV

241 KEFLTQEHLG MCGIRTINNA GDFSKPTFVA FYDV<sup>18</sup>DYVKNP KGSNYWRNRV MKVGKKLRDE GLK<sup>8</sup>VFFGVSN KEEHSHELGE

321 CGLQDAEGDK PIVCAYDEKN RKFKMEEEFS VDSFEK<sup>18</sup>FVRG VLNGEVEPYL KSEFPVENND QPVKVVVAKN FEELVNDPEK

401 DVLIEFYAPW CGHCKSLAPK YDELAEKLKD ETDIVIAKMD ATANDPPSQY EVRGFP<sup>18</sup>PTIYF APK<sup>8</sup>GSKSSPK KYEGGREVND

481 FIKYLAK<sup>18</sup>EAT DELQGFDRKG KKKGGQKQ<sup>8</sup>QK KKKTEL

Supporting Peptides:

| Peptide                    | Uniq | -10lgP | Mass      | Length | ppm  | m/z      | z | RT    | Fraction | Scan      | Source File                                | Area ebraeus | Area judaeus | #Feature | #Feature ebraeus | #Feature judaeus | Start | End | PTM           | AScore                           | Found By |
|----------------------------|------|--------|-----------|--------|------|----------|---|-------|----------|-----------|--------------------------------------------|--------------|--------------|----------|------------------|------------------|-------|-----|---------------|----------------------------------|----------|
| K.M(+15.99)DATANDPPSQYEV.R | N    | 116.71 | 1708.7362 | 15     | -0.3 | 855.3715 | 2 | 23.22 | 2        | F2:71559  | 20210611-09_2021021-OK160A_816_5.3.236.mgf |              |              | 0        | 0                | 0                | 439   | 453 |               | M1:Oxidation (M):1000.00         | PEAKS DB |
| K.SEPVPEINDDQPVK.V         | N    | 112.89 | 1451.6892 | 13     | 2.8  | 726.8509 | 2 | 19.00 | 2        | F2:64401  | 20210611-09_2021021-OK160A_816_5.3.236.mgf | 0            |              | 0        | 0                | 0                | 372   | 384 |               |                                  | PEAKS DB |
| R.FGHTTASAVMDK.A           | Y    | 110.21 | 1263.5918 | 12     | 0.4  | 632.8008 | 2 | 19.17 | 2        | F2:64682  | 20210611-09_2021021-OK160A_816_5.3.236.mgf |              | 0            | 0        | 0                | 0                | 193   | 204 |               |                                  | PEAKS DB |
| R.FGHTTASAVM(+15.99)DK.A   | Y    | 110.09 | 1279.5867 | 12     | -4.6 | 640.7950 | 2 | 14.30 | 2        | F2:57824  | 20210611-09_2021021-OK160A_816_5.3.236.mgf |              |              | 0        | 0                | 0                | 193   | 204 | Oxidation (M) | M10:Oxidation (M):1000.00        | PEAKS DB |
| K.MDATANDPPSQYEV.R         | N    | 106.16 | 1692.7413 | 15     | 0.4  | 847.3748 | 2 | 26.03 | 2        | F2:76318  | 20210611-09_2021021-OK160A_816_5.3.236.mgf |              | 0            | 0        | 0                | 0                | 439   | 453 |               |                                  | PEAKS DB |
| K.EATDELQGFDR.K            | N    | 95.64  | 1279.5680 | 11     | 0.1  | 640.7886 | 2 | 29.87 | 2        | F2:83300  | 20210611-09_2021021-OK160A_816_5.3.236.mgf | 0            | 0            | 0        | 0                | 0                | 488   | 498 |               |                                  | PEAKS DB |
| K.TSDPPVPLVK.V             | Y    | 89.26  | 1051.5913 | 10     | 2.2  | 526.8019 | 2 | 29.96 | 2        | F2:83364  | 20210611-09_2021021-OK160A_816_5.3.236.mgf | 0            | 0            | 0        | 0                | 0                | 82    | 91  |               |                                  | PEAKS DB |
| R.GFPTIYFAPK.G             | N    | 86.32  | 1139.6014 | 10     | -0.9 | 570.8051 | 2 | 46.08 | 2        | F2:112594 | 20210611-09_2021021-OK160A_816_5.3.236.mgf | 0            | 0            | 0        | 0                | 0                | 454   | 463 |               |                                  | PEAKS DB |
| K.LADTNEADIR.F             | Y    | 85.89  | 1116.5411 | 10     | 5.7  | 559.2787 | 2 | 19.91 | 2        | F2:65906  | 20210611-09_2021021-OK160A_816_5.3.236.mgf |              | 0            | 0        | 0                | 0                | 183   | 192 |               |                                  | PEAKS DB |
| R.GVLNGEVEPYLK.S           | Y    | 82.43  | 1316.6975 | 12     | -0.3 | 659.3531 | 2 | 39.10 | 2        | F2:99793  | 20210611-09_2021021-OK160A_816_5.3.236.mgf |              | 0            | 0        | 0                | 0                | 360   | 371 |               |                                  | PEAKS DB |
| K.LKDETDIVIAK.M            | N    | 82.41  | 1243.7023 | 11     | 0.0  | 622.8558 | 2 | 25.53 | 2        | F2:75618  | 20210611-09_2021021-OK160A_816_5.3.236.mgf |              | 0            | 0        | 0                | 0                | 428   | 438 |               |                                  | PEAKS DB |
| K.YKDEIVLFRPK.A            | N    | 82.19  | 1406.7921 | 11     | -0.6 | 469.9357 | 3 | 31.20 | 2        | F2:85517  | 20210611-09_2021021-OK160A_816_5.3.236.mgf |              | 0            | 0        | 0                | 0                | 207   | 217 |               |                                  | PEAKS DB |
| K.VFFGVSNK.E               | N    | 77.53  | 896.4756  | 8      | 2.5  | 449.2443 | 2 | 30.55 | 2        | F2:84259  | 20210611-09_2021021-OK160A_816_5.3.236.mgf | 0            | 0            | 0        | 0                | 0                | 304   | 311 |               |                                  | PEAKS DB |
| K.YDELAEK.L                | N    | 64.80  | 866.4021  | 7      | 4.6  | 434.2085 | 2 | 16.53 | 2        | F2:60959  | 20210611-09_2021021-OK160A_816_5.3.236.mgf |              | 0            | 0        | 0                | 0                | 421   | 427 |               |                                  | PEAKS DB |
| K.QYEDFIGR.G               | N    | 64.14  | 1026.4771 | 8      | 3.1  | 514.2452 | 2 | 30.02 | 2        | F2:83542  | 20210611-09_2021021-OK160A_816_5.3.236.mgf |              | 0            | 0        | 0                | 0                | 153   | 160 |               |                                  | PEAKS DB |
| K.RLAPEYEK.A               | N    | 61.68  | 1004.5291 | 8      | 1.7  | 503.2705 | 2 | 15.00 | 2        | F2:59037  | 20210611-09_2021021-OK160A_816_5.3.236.mgf |              | 0            | 0        | 0                | 0                | 68    | 75  |               |                                  | PEAKS DB |
| K.FEDSVVK.F                | Y    | 59.31  | 822.4123  | 7      | 2.4  | 412.2127 | 2 | 20.11 | 2        | F2:66181  | 20210611-09_2021021-OK160A_816_5.3.236.mgf |              | 0            | 0        | 0                | 0                | 223   | 229 |               |                                  | PEAKS DB |
| K.TC(+57.02)QEYGVSGYPTLK.I | N    | 58.68  | 1601.7395 | 14     | 0.4  | 801.8740 | 2 | 32.78 | 2        | F2:88088  | 20210611-09_2021021-OK160A_816_5.3.236.mgf |              | 0            | 0        | 0                | 0                | 100   | 113 |               | C2:Carbamido methylation:1000.00 | PEAKS DB |
| total 18 peptides          |      |        |           |        |      |          |   |       |          |           |                                            |              |              |          |                  |                  |       |     |               |                                  |          |

CebrOK035\_J\_344\_Conoporin

[back to list](#)

| [Protein Coverage](#) | [Supporting Peptides](#) |

Protein Coverage:

1 MRVPFPALKT MVTV<sup>87</sup>FLLLMG NMSPVVPRSS TPLHKVKVLA YK<sup>18</sup>VVTPGNSL NGVTLQDLAA TNYKVTCVIQ VENWTRYALM Carbamidomethylation (+57.02)

81 YPTVLT<sup>18</sup>LGSP AVSSAPTAIL PTKKEAFATH KPRSTATGVS GTVSWELQGA ERRFVLMWAA PYNFNHYSNW MGVGMTREGL

161 VDVAPGNTWF NQMYYGSSSG NLNFKR<sup>18</sup>KEYF YNTDPFIYSN EKFEAEGDMT NGHHAQVRVI IRP<sup>18</sup>TRNNWED LADEIRQNMV

Supporting Peptides:

| Peptide                      | Uniq | -10lgP | Mass      | Length | ppm  | m/z       | z | RT    | Fraction | Scan      | Source File                                | Area ebraeus | Area judaeus | #Feature | #Feature ebraeus | #Feature judaeus | Start | End | PTM                  | AScore                           | Found By |
|------------------------------|------|--------|-----------|--------|------|-----------|---|-------|----------|-----------|--------------------------------------------|--------------|--------------|----------|------------------|------------------|-------|-----|----------------------|----------------------------------|----------|
| K.VVTPGNSLNGVTLQDLAATNYK.V   | N    | 159.55 | 2274.1855 | 22     | 12.3 | 1138.1093 | 2 | 47.99 | 2        | F2:115425 | 20210611-09_2021021-OK160A_816_5.3.236.mgf |              | 0            | 0        | 0                | 0                | 43    | 64  |                      |                                  | PEAKS DB |
| K.FEAEGDMTNGHHAQVR.V         | N    | 118.42 | 1797.7853 | 16     | 2.2  | 600.2678  | 3 | 18.47 | 2        | F2:63606  | 20210611-09_2021021-OK160A_816_5.3.236.mgf |              | 0            | 0        | 0                | 0                | 203   | 218 |                      |                                  | PEAKS DB |
| K.VTC(+57.02)VIQVENWTR.Y     | N    | 117.26 | 1503.7504 | 12     | 0.3  | 752.8795  | 2 | 40.90 | 2        | F2:103099 | 20210611-09_2021021-OK160A_816_5.3.236.mgf |              | 0            | 0        | 0                | 0                | 65    | 76  | Carbamidomethylation | C3:Carbamido methylation:1000.00 | PEAKS DB |
| K.EFYNTDPFIYSNEK.F           | N    | 116.83 | 1928.8468 | 15     | 1.6  | 965.4282  | 2 | 46.01 | 2        | F2:112287 | 20210611-09_2021021-OK160A_816_5.3.236.mgf |              | 0            | 0        | 0                | 0                | 188   | 202 |                      |                                  | PEAKS DB |
| K.FEAEGDM(+15.99)TNGHHAQVR.V | N    | 104.09 | 1813.7802 | 16     | -0.5 | 605.5978  | 3 | 13.73 | 2        | F2:57220  | 20210611-09_2021021-OK160A_816_5.3.236.mgf |              | 0            | 0        | 0                | 0                | 203   | 218 |                      | M7:Oxidation (M):1000.00         | PEAKS DB |
| R.NNWEDLADEIR.Q              | N    | 99.52  | 1373.6211 | 11     | 0.4  | 687.8152  | 2 | 45.04 | 2        | F2:110772 | 20210611-09_2021021-OK160A_816_5.3.236.mgf |              | 0            | 0        | 0                | 0                | 226   | 236 |                      |                                  | PEAKS DB |
| R.KEFYNTDPFIYSNEK.F          | N    | 96.57  | 2056.9417 | 16     | 2.0  | 686.6530  | 3 | 40.01 | 2        | F2:101239 | 20210611-09_2021021-OK160A_816_5.3.236.mgf |              | 0            | 0        | 0                | 0                | 187   | 202 |                      |                                  | PEAKS DB |
| K.EAFATHKPR.S                | Y    | 76.19  | 1055.5511 | 9      | 4.2  | 352.8577  | 3 | 10.56 | 2        | F2:53584  | 20210611-09_2021021-OK160A_816_5.3.236.mgf |              | 0            | 0        | 0                | 0                | 105   | 113 |                      |                                  | PEAKS DB |
| total 8 peptides             |      |        |           |        |      |           |   |       |          |           |                                            |              |              |          |                  |                  |       |     |                      |                                  |          |

P\_033D\_033\_Arginine

[back to list](#)

| [Protein Coverage](#) | [Supporting Peptides](#) |

Protein Coverage:



### Supporting Peptides:

**total 14 peptides**

[back to list](#)

### Protein Coverage:

321 SLGMQASAW E SVKFLMKNLL STDFFLD

total 8 peptides

[back to list](#)

### Protein Coverage:

321 LRWSLALTDE NINNTKTVLE AVENDNKGPL VSLGMQASAW ESVKFLMKNL LSTDFFLD

total 8 peptides

[illegible]

**OK212\_J\_281\_Prohormone-4a**

[| Protein Coverage](#) | [Supporting Peptides](#) |

1 MNSFYYPYSA A M M P F N S F R P P M H P I S Y L H P P M G S Y F V Y P A M N T M S F Y N L M H P M Y N P A H P M N H A N P Y S P M N P V T N L A H P M N P  
81 A P Y M Y P M N P V N S W Y N P M N Q Y P F H P P M Q V A S Y L T P P L G S Y L F S P N G Y H F L A L T P Q A A P L N L M H M P L Y S Y Q A G G M Y N  
161 P Y M Y P Q S S A L Y Q Y G Y A A G V E G A M A D N P S M G Y G V Y P M W P Q A F H M W P L P Y Q Y T V M P A Q E G M C S Y D R E F  
241 K C W G S A T C I T I E A I C D K N F D C N N H A D E D P R I C A V A G R R P S Y G I L V S Y L M L P N Q Q W M L Q R L F N N V D P Y T A A H A L K L A T S L G D  
321 L R W S L A L T D E N I N N T K T V L E A V E N D N K G P L V S L G M Q A S A W E S V K F L M K N L L S T D F F L D

### Supporting Peptides:

**OK212\_J\_284\_Prohormone-4a**

| [Protein Coverage](#) | [Supporting Peptides](#) |

1 MNSFYPSYSA MPPFNSFRFP MHPISYLHPF MGYSFYFYPAM NTMSFYNLHM PMYNFAHPMN HANPHSLPNP VTNLAHPMNP

81 ANLYSLHMFV TNLAHMMPFA NPFYNPMQSN SWYNPMNMFQY FPFHPMQVAS YYLTPPLGSS YLFPSPGYWH FHLLATQAAA

161 PLNLHMPNFP YQYAGGMVNF YMPYPQSSAL YQYPGYAAGV PGAMAWNQFG GAAWNPSYAM YGYGYNPMGW QFAHMMPLHFN

241 YYQTVMPAQE GMCSDRPFK CWGSATCITI EALCDKNDFC NNHADEDPRI CVAAGRPSYG ILSYSLMLPN QQWMLQKLFN

321 NVDPYTAHAH LKLATSLGDL RWSLALTDEN INNTKTVLEA VENDNKGPLV SLGMAQASAW SVKFLMKNLL STDFFLD

### Supporting Peptides:

**OK212\_J\_282\_Prohormone-4a**

| [Protein Coverage](#) | [Supporting Peptides](#) |

1 MNSFYYPYSA A MPPFNSFRFP MHPISYLHPF MGYSFYVYPM NTMSFYNLHM PMYNPAHPMN HANFYSPMNP VTNLAHPMPN  
81 ANSHSLPHVF LTNLAHPMNA NPYSPMFPVT NLAHPMNPAN PYPNMFPVNS VYWNPMFQFP FHPPMQVAS YLTPPLGSSY  
161 LFPNSGYGHF HLAFTQAAAP LNLHMHPFVS YQAGGMYPNY PYNQCSALY QPYQGAAGV GMAWNGPFC AAWNYPGAS  
241 YGVYPMWPAQ FAHMMWPLHPY YQTVMPAQEG MCSYDRPFKC WGSATCITE AICDKNFDCN NHADEDPRG VAGRRPSYGI  
321 LVSYLMLENQ QWMLQKLFNN VDPYTAHAH KLATSLGDLR WSLALTDENI NNTKTVLEAV ENDNKGPLVS LQMQASAWES

401 VKF LMNI

K.NLLSTDFFLD

CebrOK035\_J\_340\_Prohormone-4a

[back to list](#)

| [Protein Coverage](#) | [Supporting Peptides](#) |

Protein Coverage:

1 MNSFYFYSAA MMPFNSFRPP MHPISYLHPP MGYSFVYPAM NTMSPYNLMH PMYNPAHPMN HANPYSPMNP VTNLAHPMNP  
81 ANPHSPLNPV TNLAHFMNPA PMNPANPYSP MNPVTNLAHP MNPALAHPMN PANPYNPMNP VNSWYNPMNF QYPFHPPMQV  
161 ASYILTPTPLG SSYLFPSNGY GHFHLAPTQA AAPLNLMHF PYSYQAGGMY NPYMPYQSS ALYQPYGYAA GVPGAMAWNQ  
241 FGGAAWNYPYS AMGYGVYPMW PAQFAHMWPL HPYYQTVMPA QEGMCSYDRP FKCWGSATCI TIEAICDNF DCNNHADEDP  
321 RICVAGRRPS YGILVSYLML PNQQWMLQK**L FNNVDPYTAA HALKLATSLG DLRWSLALTD ENINNTKTVL EAVENDNKGE**

401 **LVSLGMQASA WESVKFLMKN LLSTDFFLD**

Supporting Peptides:

| Peptide                          | Uniq | -10lgP | Mass      | Length | ppm  | m/z      | z | RT    | Fraction | Scan      | Source File                                | Area ebraeus | Area judaeus | #Feature | #Feature ebraeus | #Feature judaeus | Start | End | PTM                        | AScore | Found By |
|----------------------------------|------|--------|-----------|--------|------|----------|---|-------|----------|-----------|--------------------------------------------|--------------|--------------|----------|------------------|------------------|-------|-----|----------------------------|--------|----------|
| K.GPLVSLGMQASAWESVK.F            | Y    | 138.35 | 1758.8975 | 17     | 2.1  | 880.4542 | 2 | 50.02 | 2        | F2:118803 | 20210611-09_2021021-OK160A_816_5.3.236.mgf |              | 0            | 0        | 0                | 0                | 399   | 415 |                            |        | PEAKS DB |
| K.GPLVSLGM(+15.99)QASAWESVK.F    | Y    | 135.06 | 1774.8923 | 17     | 0.3  | 888.4500 | 2 | 45.86 | 2        | F2:112235 | 20210611-09_2021021-OK160A_816_5.3.236.mgf |              | 0            | 0        | 0                | 0                | 399   | 415 | M8:Oxidat ion (M):10 00.00 |        | PEAKS DB |
| R.WSLALTDENINNTK.T               | N    | 121.92 | 1617.7998 | 14     | -1.3 | 809.9027 | 2 | 42.21 | 2        | F2:105115 | 20210611-09_2021021-OK160A_816_5.3.236.mgf | 0            | 0            | 0        | 0                | 0                | 374   | 387 |                            |        | PEAKS DB |
| K.LFNNVDPYTAAHALK.L              | N    | 118.88 | 1672.8573 | 15     | -0.1 | 837.4324 | 2 | 38.61 | 2        | F2:99023  | 20210611-09_2021021-OK160A_816_5.3.236.mgf | 0            | 0            | 0        | 0                | 0                | 350   | 364 |                            |        | PEAKS DB |
| K.TVLEAVENDNK.G                  | Y    | 105.21 | 1230.6091 | 11     | 1.9  | 616.3104 | 2 | 26.66 | 2        | F2:77659  | 20210611-09_2021021-OK160A_816_5.3.236.mgf |              | 0            | 0        | 0                | 0                | 388   | 398 |                            |        | PEAKS DB |
| K.TVLEAVENDNKGPLVSLGMQASAWESVK.F | Y    | 94.51  | 2971.4961 | 28     | 5.6  | 991.5074 | 3 | 54.88 | 2        | F2:126206 | 20210611-09_2021021-OK160A_816_5.3.236.mgf |              | 0            | 0        | 0                | 0                | 388   | 415 |                            |        | PEAKS DB |
| K.LATSLGDLR.W                    | N    | 77.79  | 944.5291  | 9      | 3.7  | 473.2715 | 2 | 31.22 | 2        | F2:85544  | 20210611-09_2021021-OK160A_816_5.3.236.mgf | 0            | 0            | 0        | 0                | 0                | 365   | 373 |                            |        | PEAKS DB |
| K.NLLSTDFFLD                     | Y    | 56.00  | 1183.5760 | 10     | -1.0 | 592.7922 | 2 | 60.15 | 2        | F2:132237 | 20210611-09_2021021-OK160A_816_5.3.236.mgf |              | 0            | 0        | 0                | 0                | 420   | 429 |                            |        | PEAKS DB |
| total 8 peptides                 |      |        |           |        |      |          |   |       |          |           |                                            |              |              |          |                  |                  |       |     |                            |        |          |

OK212\_J\_283\_Prohormone-4a

[back to list](#)

| [Protein Coverage](#) | [Supporting Peptides](#) |

Protein Coverage:

1 MNSFYFYSAA MMPFNSFRPP MHPISYLHPP MGYSFVYPAM NTMSPYNLMH PMYNPAHPMN HANPHSPLNP VTNLAHPMNP  
81 ANPYSPMNPV TNLAHFMNPA NSHSPLNPVT NLAHPMNPAN PYSPMNPVTN LAHPMNPANP YNPMNPFVNSW YNPMNFQYPF  
161 HPPMQVASYY LTPPLGSSYL FPSNGYGHFH LAPTQAAAPL NLHMHPFYYS QAGGMYNPYM YPYQSSALYQ PYGYAAGVPG  
241 AMAWNQFGGA AWPNPYSAMGY GVYPMWPAQF AHMWPLHPYY QTVMPAQEGM CSYDRPFKCW GSATCITIEA ICDKNFDCNN  
321 HADEDPRICV AGRRPSYGIL VSYLMLPNQQ WMLQK**LFNNV DPYTAAHALK LATSLGDLRW SLALTDENIN NTKTVLEAVE**

401 **NDNKGPLVSL GMQASAWESV KFLMKNLLST DFFLD**

Supporting Peptides:

| Peptide                          | Uniq | -10lgP | Mass      | Length | ppm  | m/z      | z | RT    | Fraction | Scan      | Source File                                | Area ebraeus | Area judaeus | #Feature | #Feature ebraeus | #Feature judaeus | Start | End | PTM                        | AScore | Found By |
|----------------------------------|------|--------|-----------|--------|------|----------|---|-------|----------|-----------|--------------------------------------------|--------------|--------------|----------|------------------|------------------|-------|-----|----------------------------|--------|----------|
| K.GPLVSLGMQASAWESVK.F            | Y    | 138.35 | 1758.8975 | 17     | 2.1  | 880.4542 | 2 | 50.02 | 2        | F2:118803 | 20210611-09_2021021-OK160A_816_5.3.236.mgf |              | 0            | 0        | 0                | 0                | 405   | 421 |                            |        | PEAKS DB |
| K.GPLVSLGM(+15.99)QASAWESVK.F    | Y    | 135.06 | 1774.8923 | 17     | 0.3  | 888.4500 | 2 | 45.86 | 2        | F2:112235 | 20210611-09_2021021-OK160A_816_5.3.236.mgf |              | 0            | 0        | 0                | 0                | 405   | 421 | M8:Oxidat ion (M):10 00.00 |        | PEAKS DB |
| R.WSLALTDENINNTK.T               | N    | 121.92 | 1617.7998 | 14     | -1.3 | 809.9027 | 2 | 42.21 | 2        | F2:105115 | 20210611-09_2021021-OK160A_816_5.3.236.mgf | 0            | 0            | 0        | 0                | 0                | 380   | 393 |                            |        | PEAKS DB |
| K.LFNNVDPYTAAHALK.L              | N    | 118.88 | 1672.8573 | 15     | -0.1 | 837.4324 | 2 | 38.61 | 2        | F2:99023  | 20210611-09_2021021-OK160A_816_5.3.236.mgf | 0            | 0            | 0        | 0                | 0                | 356   | 370 |                            |        | PEAKS DB |
| K.TVLEAVENDNK.G                  | Y    | 105.21 | 1230.6091 | 11     | 1.9  | 616.3104 | 2 | 26.66 | 2        | F2:77659  | 20210611-09_2021021-OK160A_816_5.3.236.mgf |              | 0            | 0        | 0                | 0                | 394   | 404 |                            |        | PEAKS DB |
| K.TVLEAVENDNKGPLVSLGMQASAWESVK.F | Y    | 94.51  | 2971.4961 | 28     | 5.6  | 991.5074 | 3 | 54.88 | 2        | F2:126206 | 20210611-09_2021021-OK160A_816_5.3.236.mgf |              | 0            | 0        | 0                | 0                | 394   | 421 |                            |        | PEAKS DB |
| K.LATSLGDLR.W                    | N    | 77.79  | 944.5291  | 9      | 3.7  | 473.2715 | 2 | 31.22 | 2        | F2:85544  | 20210611-09_2021021-OK160A_816_5.3.236.mgf | 0            | 0            | 0        | 0                | 0                | 371   | 379 |                            |        | PEAKS DB |
| K.NLLSTDFFLD                     | Y    | 56.00  | 1183.5760 | 10     | -1.0 | 592.7922 | 2 | 60.15 | 2        | F2:132237 | 20210611-09_2021021-OK160A_816_5.3.236.mgf |              | 0            | 0        | 0                | 0                | 426   | 435 |                            |        | PEAKS DB |
| total 8 peptides                 |      |        |           |        |      |          |   |       |          |           |                                            |              |              |          |                  |                  |       |     |                            |        |          |

CebrOK033\_J\_239\_Prohormone-4a

[back to list](#)

| [Protein Coverage](#) | [Supporting Peptides](#) |

Protein Coverage:

1 MNSFYFYSAA MMPFNSFRPP MHPISYLHPP MGYSFVYPAM NTMSPYNLMH PMYNPAHPMN HANPYSPMNP VTNLAHPMNP  
81 ANPHSPLNPV TNLAHFMNPA NPYSPMNPVT NLAHPMNPAN PYSPMNPVTN LAHPMNPATP YNPMNPFVNSW YNPMNFQYPF  
161 HPPMQVASYY LTPPLGSSYL FPSNGYGHFH LAPTQAAAPL NLHMHPFYYS QAGGMYNPYM YPYQSSALYQ PYGYAAGVPG  
241 AMAWNQFGGA AWPNPYSAMGY GVYPMWPAQF AHMWPLHPYY QTVMPAQEGM CSYDRPFKCW GSATCITIEA ICDKNFDCNN  
321 HADEDPRICV AGRRPSYGIL VSYLMLPNQQ WMLQK**LFNNV DPYTAAHALK LATSLGDLRW SLALTDENIN NTKTVLEAVE**

401 **NDNKGPLVSL GMQASAWESV KFLMKNLLST DFFLD**

Supporting Peptides:

| Peptide                          | Uniq | -10lgP | Mass      | Length | ppm  | m/z      | z | RT    | Fraction | Scan      | Source File                                | Area ebraeus | Area judaeus | #Feature | #Feature ebraeus | #Feature judaeus | Start | End | PTM                        | AScore | Found By |
|----------------------------------|------|--------|-----------|--------|------|----------|---|-------|----------|-----------|--------------------------------------------|--------------|--------------|----------|------------------|------------------|-------|-----|----------------------------|--------|----------|
| K.GPLVSLGMQASAWESVK.F            | Y    | 138.35 | 1758.8975 | 17     | 2.1  | 880.4542 | 2 | 50.02 | 2        | F2:118803 | 20210611-09_2021021-OK160A_816_5.3.236.mgf |              | 0            | 0        | 0                | 0                | 405   | 421 |                            |        | PEAKS DB |
| K.GPLVSLGM(+15.99)QASAWESVK.F    | Y    | 135.06 | 1774.8923 | 17     | 0.3  | 888.4500 | 2 | 45.86 | 2        | F2:112235 | 20210611-09_2021021-OK160A_816_5.3.236.mgf |              | 0            | 0        | 0                | 0                | 405   | 421 | M8:Oxidat ion (M):10 00.00 |        | PEAKS DB |
| R.WSLALTDENINNTK.T               | N    | 121.92 | 1617.7998 | 14     | -1.3 | 809.9027 | 2 | 42.21 | 2        | F2:105115 | 20210611-09_2021021-OK160A_816_5.3.236.mgf | 0            | 0            | 0        | 0                | 0                | 380   | 393 |                            |        | PEAKS DB |
| K.LFNNVDPYTAAHALK.L              | N    | 118.88 | 1672.8573 | 15     | -0.1 | 837.4324 | 2 | 38.61 | 2        | F2:99023  | 20210611-09_2021021-OK160A_816_5.3.236.mgf | 0            | 0            | 0        | 0                | 0                | 356   | 370 |                            |        | PEAKS DB |
| K.TVLEAVENDNK.G                  | Y    | 105.21 | 1230.6091 | 11     | 1.9  | 616.3104 | 2 | 26.66 | 2        | F2:77659  | 20210611-09_2021021-OK160A_816_5.3.236.mgf |              | 0            | 0        | 0                | 0                | 394   | 404 |                            |        | PEAKS DB |
| K.TVLEAVENDNKGPLVSLGMQASAWESVK.F | Y    | 94.51  | 2971.4961 | 28     | 5.6  | 991.5074 | 3 | 54.88 | 2        | F2:126206 | 20210611-09_2021021-OK160A_816_5.3.236.mgf |              | 0            | 0        | 0                | 0                | 394   | 421 |                            |        | PEAKS DB |
| K.LATSLGDLR.W                    | N    | 77.79  | 944.5291  | 9      | 3.7  | 473.2715 | 2 | 31.22 | 2        | F2:85544  | 20210611-09_2021021-OK160A_816_5.3.236.mgf | 0            | 0            | 0        | 0                | 0                | 371   | 379 |                            |        | PEAKS DB |
| K.NLLSTDFFLD                     | Y    | 56.00  | 1183.5760 | 10     | -1.0 | 592.7922 | 2 | 60.15 | 2        | F2:132237 | 20210611-09_2021021-OK160A_816_5.3.236.mgf |              | 0            | 0        | 0                | 0                | 426   | 435 |                            |        | PEAKS DB |
| total 8 peptides                 |      |        |           |        |      |          |   |       |          |           |                                            |              |              |          |                  |                  |       |     |                            |        |          |

OK214\_J\_306\_Prohormone-4a

[back to list](#)

| [Protein Coverage](#) | [Supporting Peptides](#) |

Protein Coverage:

1 MNSFYYPYSAA MMPFNSFRPP MHPISYLHPP MGYSFVYPAM NTMSPYNLHM PMYNPAHFMN HANPYSPMNP VTNLAHPMNP  
81 ANPHSPLNPV TNLAHEMNFA NPYSPMNPVT NLAHEMNPAN PHSPLNPVTN LAHEMNPANP YSPMNPVTNL AHPMNPATPY  
161 NPMNPFVNSWY NPMNFQYPFH PPMQVASYL TPPLGSSYLF PSNGYGHFHL APTQAAAPLN LHMHFPPYSYQ AGGMYPYMY  
241 PYQSSALYQP YGYAAGVPGA MAWNQFGGAA WNPYSAMGYG VYPMWPAQFA HMWPLHPYYQ TVMPAQEGMC SYDRPFKCWG  
321 SATCITIEAI CDKNFDCNNH ADEDPRICVA GRRPSYGILV SYLMLPNQQW MLQKLFNNVD PYTAAHALKL ATSLGDLRWS  
401 LALTDENINN TKTVLEAVEN DNKGPLVSLG MQASAWESVK FLMKNLLSTD PFLD

Supporting Peptides:

| Peptide                          | Uniq | -10lgP | Mass      | Length | ppm  | m/z      | z | RT    | Fraction | Scan      | Source File                                | Area ebraeus | Area judaeus | #Feature | #Feature ebraeus | #Feature judaeus | Start | End | PTM | AScore                     | Found By |
|----------------------------------|------|--------|-----------|--------|------|----------|---|-------|----------|-----------|--------------------------------------------|--------------|--------------|----------|------------------|------------------|-------|-----|-----|----------------------------|----------|
| K.GPLVSLGMQASAWESVK.F            | Y    | 138.35 | 1758.8975 | 17     | 2.1  | 880.4542 | 2 | 50.02 | 2        | F2:118803 | 20210611-09_2021021-OK160A_816_5.3.236.mgf |              | 0            | 0        | 0                | 0                | 424   | 440 |     |                            | PEAKS DB |
| K.GPLVSLGM(+15.99)QASAWESVK.F    | Y    | 135.06 | 1774.8923 | 17     | 0.3  | 888.4500 | 2 | 45.86 | 2        | F2:112235 | 20210611-09_2021021-OK160A_816_5.3.236.mgf |              | 0            | 0        | 0                | 0                | 424   | 440 |     | M8:Oxidat ion (M):10 00.00 | PEAKS DB |
| R.WSLALTDENINNTK.T               | N    | 121.92 | 1617.7998 | 14     | -1.3 | 809.9027 | 2 | 42.21 | 2        | F2:105115 | 20210611-09_2021021-OK160A_816_5.3.236.mgf | 0            | 0            | 0        | 0                | 0                | 399   | 412 |     |                            | PEAKS DB |
| K.LFNNVDPTYAAHALK.L              | N    | 118.88 | 1672.8573 | 15     | -0.1 | 837.4324 | 2 | 38.61 | 2        | F2:99023  | 20210611-09_2021021-OK160A_816_5.3.236.mgf | 0            | 0            | 0        | 0                | 0                | 375   | 389 |     |                            | PEAKS DB |
| K.TVLEAVENDNK.G                  | Y    | 105.21 | 1230.6091 | 11     | 1.9  | 616.3104 | 2 | 26.66 | 2        | F2:77659  | 20210611-09_2021021-OK160A_816_5.3.236.mgf |              | 0            | 0        | 0                | 0                | 413   | 423 |     |                            | PEAKS DB |
| K.TVLEAVENDNKGPLVSLGMQASAWESVK.F | Y    | 94.51  | 2971.4961 | 28     | 5.6  | 991.5074 | 3 | 54.88 | 2        | F2:126206 | 20210611-09_2021021-OK160A_816_5.3.236.mgf |              | 0            | 0        | 0                | 0                | 413   | 440 |     |                            | PEAKS DB |
| K.LATSLGDLR.W                    | N    | 77.79  | 944.5291  | 9      | 3.7  | 473.2715 | 2 | 31.22 | 2        | F2:85544  | 20210611-09_2021021-OK160A_816_5.3.236.mgf | 0            | 0            | 0        | 0                | 0                | 390   | 398 |     |                            | PEAKS DB |
| K.NLLSTDFFLD                     | Y    | 56.00  | 1183.5760 | 10     | -1.0 | 592.7922 | 2 | 60.15 | 2        | F2:132237 | 20210611-09_2021021-OK160A_816_5.3.236.mgf |              | 0            | 0        | 0                | 0                | 445   | 454 |     |                            | PEAKS DB |
| total 8 peptides                 |      |        |           |        |      |          |   |       |          |           |                                            |              |              |          |                  |                  |       |     |     |                            |          |

OK005\_J\_296\_Prohormone-4a

[back to list](#)

| [Protein Coverage](#) | [Supporting Peptides](#) |

Protein Coverage:

1 MNSFYYPYSAA MMPFNSFRPP MHPISYLHPP MGYSFVYPAM NTMSPYNLHM PMYNPAHFMN HANPYSPMNP VTNLAHPMNP  
81 ANPHSPLNPV TNLAHEMNFA NPYSPMNPVT NLAHEMNPAN PHSPLNPVTN LAHEMNPANP YSPMNPVTNL AHPMNPANPY  
161 NPMNPFVNSWY NPMNFQYPFH PPMQVASYL TPPLGSSYLF PSNGYGHFHL APTQAAAPLN LHMHFPPYSYQ AGGMYPYMY  
241 PYQSSALYQP YGYAAGVPGA MAWNQFGGAA WNPYSAMGYG VYPMWPAQFA HMWPLHPYYQ TVMPAQEGMC SYDRPFKCWG  
321 SATCITIEAI CDKNFDCNNH ADEDPRICVA GRRPSYGILV SYLMLPNQQW MLQKLFNNVD PYTAAHALKL ATSLGDLRWS  
401 LALTDENINN TKTVLEAVEN DNKGPLVSLG MQASAWESVK FLMKNLLSTD PFLD

Supporting Peptides:

| Peptide                          | Uniq | -10lgP | Mass      | Length | ppm  | m/z      | z | RT    | Fraction | Scan      | Source File                                | Area ebraeus | Area judaeus | #Feature | #Feature ebraeus | #Feature judaeus | Start | End | PTM | AScore                     | Found By |
|----------------------------------|------|--------|-----------|--------|------|----------|---|-------|----------|-----------|--------------------------------------------|--------------|--------------|----------|------------------|------------------|-------|-----|-----|----------------------------|----------|
| K.GPLVSLGMQASAWESVK.F            | Y    | 138.35 | 1758.8975 | 17     | 2.1  | 880.4542 | 2 | 50.02 | 2        | F2:118803 | 20210611-09_2021021-OK160A_816_5.3.236.mgf |              | 0            | 0        | 0                | 0                | 424   | 440 |     |                            | PEAKS DB |
| K.GPLVSLGM(+15.99)QASAWESVK.F    | Y    | 135.06 | 1774.8923 | 17     | 0.3  | 888.4500 | 2 | 45.86 | 2        | F2:112235 | 20210611-09_2021021-OK160A_816_5.3.236.mgf |              | 0            | 0        | 0                | 0                | 424   | 440 |     | M8:Oxidat ion (M):10 00.00 | PEAKS DB |
| R.WSLALTDENINNTK.T               | N    | 121.92 | 1617.7998 | 14     | -1.3 | 809.9027 | 2 | 42.21 | 2        | F2:105115 | 20210611-09_2021021-OK160A_816_5.3.236.mgf | 0            | 0            | 0        | 0                | 0                | 399   | 412 |     |                            | PEAKS DB |
| K.LFNNVDPTYAAHALK.L              | N    | 118.88 | 1672.8573 | 15     | -0.1 | 837.4324 | 2 | 38.61 | 2        | F2:99023  | 20210611-09_2021021-OK160A_816_5.3.236.mgf | 0            | 0            | 0        | 0                | 0                | 375   | 389 |     |                            | PEAKS DB |
| K.TVLEAVENDNK.G                  | Y    | 105.21 | 1230.6091 | 11     | 1.9  | 616.3104 | 2 | 26.66 | 2        | F2:77659  | 20210611-09_2021021-OK160A_816_5.3.236.mgf |              | 0            | 0        | 0                | 0                | 413   | 423 |     |                            | PEAKS DB |
| K.TVLEAVENDNKGPLVSLGMQASAWESVK.F | Y    | 94.51  | 2971.4961 | 28     | 5.6  | 991.5074 | 3 | 54.88 | 2        | F2:126206 | 20210611-09_2021021-OK160A_816_5.3.236.mgf |              | 0            | 0        | 0                | 0                | 413   | 440 |     |                            | PEAKS DB |
| K.LATSLGDLR.W                    | N    | 77.79  | 944.5291  | 9      | 3.7  | 473.2715 | 2 | 31.22 | 2        | F2:85544  | 20210611-09_2021021-OK160A_816_5.3.236.mgf | 0            | 0            | 0        | 0                | 0                | 390   | 398 |     |                            | PEAKS DB |
| K.NLLSTDFFLD                     | Y    | 56.00  | 1183.5760 | 10     | -1.0 | 592.7922 | 2 | 60.15 | 2        | F2:132237 | 20210611-09_2021021-OK160A_816_5.3.236.mgf |              | 0            | 0        | 0                | 0                | 445   | 454 |     |                            | PEAKS DB |
| total 8 peptides                 |      |        |           |        |      |          |   |       |          |           |                                            |              |              |          |                  |                  |       |     |     |                            |          |

CebrOK035\_J\_339\_Prohormone-4a

[back to list](#)

| [Protein Coverage](#) | [Supporting Peptides](#) |

Protein Coverage:

1 MNSFYYPYSAA MMPFNSFRPP MHPISYLHPP MGYSFVYPAM NTMSPYNLHM PMYNPAHFMN HANPHSPLNP VTNLAHPMNP  
81 ANPYSPINPV TNLAHEMNFA NPHSPLNPVT NLAHEMNPAN PYSPMNPVTN LAHEMNPANP YSPMNPVTNL AHPMNPANPY  
161 NPMNPFVNSWY NPMNFQYPFH PPMQVASYL TPPLGSSYLF PSNGYGHFHL APTQAAAPLN LHMHFPPYSYQ AGGMYPYMY  
241 PYQSSALYQP YGYAAGVPGA MAWNQFGGAA WNPYSAMGYG VYPMWPAQFA HMWPLHPYYQ TVMPAQEGMC SYDRPFKCWG  
321 SATCITIEAI CDKNFDCNNH ADEDPRICVA GRRPSYGILV SYLMLPNQQW MLQKLFNNVD PYTAAHALKL ATSLGDLRWS  
401 LALTDENINN TKTVLEAVEN DNKGPLVSLG MQASAWESVK FLMKNLLSTD PFLD

Supporting Peptides:

| Peptide                          | Uniq | -10lgP | Mass      | Length | ppm  | m/z      | z | RT    | Fraction | Scan      | Source File                                | Area ebraeus | Area judaeus | #Feature | #Feature ebraeus | #Feature judaeus | Start | End | PTM | AScore                     | Found By |
|----------------------------------|------|--------|-----------|--------|------|----------|---|-------|----------|-----------|--------------------------------------------|--------------|--------------|----------|------------------|------------------|-------|-----|-----|----------------------------|----------|
| K.GPLVSLGMQASAWESVK.F            | Y    | 138.35 | 1758.8975 | 17     | 2.1  | 880.4542 | 2 | 50.02 | 2        | F2:118803 | 20210611-09_2021021-OK160A_816_5.3.236.mgf |              | 0            | 0        | 0                | 0                | 424   | 440 |     |                            | PEAKS DB |
| K.GPLVSLGM(+15.99)QASAWESVK.F    | Y    | 135.06 | 1774.8923 | 17     | 0.3  | 888.4500 | 2 | 45.86 | 2        | F2:112235 | 20210611-09_2021021-OK160A_816_5.3.236.mgf |              | 0            | 0        | 0                | 0                | 424   | 440 |     | M8:Oxidat ion (M):10 00.00 | PEAKS DB |
| R.WSLALTDENINNTK.T               | N    | 121.92 | 1617.7998 | 14     | -1.3 | 809.9027 | 2 | 42.21 | 2        | F2:105115 | 20210611-09_2021021-OK160A_816_5.3.236.mgf | 0            | 0            | 0        | 0                | 0                | 399   | 412 |     |                            | PEAKS DB |
| K.LFNNVDPTYAAHALK.L              | N    | 118.88 | 1672.8573 | 15     | -0.1 | 837.4324 | 2 | 38.61 | 2        | F2:99023  | 20210611-09_2021021-OK160A_816_5.3.236.mgf | 0            | 0            | 0        | 0                | 0                | 375   | 389 |     |                            | PEAKS DB |
| K.TVLEAVENDNK.G                  | Y    | 105.21 | 1230.6091 | 11     | 1.9  | 616.3104 | 2 | 26.66 | 2        | F2:77659  | 20210611-09_2021021-OK160A_816_5.3.236.mgf |              | 0            | 0        | 0                | 0                | 413   | 423 |     |                            | PEAKS DB |
| K.TVLEAVENDNKGPLVSLGMQASAWESVK.F | Y    | 94.51  | 2971.4961 | 28     | 5.6  | 991.5074 | 3 | 54.88 | 2        | F2:126206 | 20210611-09_2021021-OK160A_816_5.3.236.mgf |              | 0            | 0        | 0                | 0                | 413   | 440 |     |                            | PEAKS DB |
| K.LATSLGDLR.W                    | N    | 77.79  | 944.5291  | 9      | 3.7  | 473.2715 | 2 | 31.22 | 2        | F2:85544  | 20210611-09_2021021-OK160A_816_5.3.236.mgf | 0            | 0            | 0        | 0                | 0                | 390   | 398 |     |                            | PEAKS DB |
| K.NLLSTDFFLD                     | Y    | 56.00  | 1183.5760 | 10     | -1.0 | 592.7922 | 2 | 60.15 | 2        | F2:132237 | 20210611-09_2021021-OK160A_816_5.3.236.mgf |              | 0            | 0        | 0                | 0                | 445   | 454 |     |                            | PEAKS DB |
| total 8 peptides                 |      |        |           |        |      |          |   |       |          |           |                                            |              |              |          |                  |                  |       |     |     |                            |          |

CebrOK035\_J\_341\_Prohormone-4a

[back to list](#)

| [Protein Coverage](#) | [Supporting Peptides](#) |

Protein Coverage:

481 **LSTDFFLD**[illegible][back to list](#)

481 MKNLLSTDFE LD

[illegible][back to list](#)

1 PGLKIWR**IEQ FEVK**DWPEED YGEFYNGDSY IILNTYKDEE TEDLNVDVHF WIGK**NSTQDE YGTAAYKTVE LDTLLDDKPV** ■ Oxidation (M) (+15.99)

81 **QHRE**VQGHES SLFKSYFPGK <sup>104</sup>**IQTMEGGANS GFR**SVPDKEK YEPRLMRFAK DKGGNIVVRE IPRACSLVTS GDVFILDAGL

161 KLYQFNGCSC SPMEKSKAMQ YIGDIKSRG **EAES**EVLD**EA DTSK**NNHEFYT YLDEEPEDDG CTSDDDEDGD AKKLLRVNTD

241 TRDFEEVKDG DVTQDDFKSD DVFIYDSGDT VFWVVGCNAS SAEKKNGLPL AHNYLCKCGS FWKSITVVKE GAKSKQFASA

321 LAA

| Peptide                     | Uniq | -10lgP | Mass      | Length | ppm  | m/z      | z | RT    | Fraction | Scan     | Source File                                | Area ebraeus | Area judaeus | #Feature | #Feature ebraeus | #Feature judaeus | Start | End | PTM           | AScore                   | Found By |
|-----------------------------|------|--------|-----------|--------|------|----------|---|-------|----------|----------|--------------------------------------------|--------------|--------------|----------|------------------|------------------|-------|-----|---------------|--------------------------|----------|
| R.GAEASEVLEADATSK.N         | Y    | 131.43 | 1578.6897 | 15     | 0.6  | 790.3493 | 2 | 27.29 | 2        | F2:78750 | 20210611-09_2021021-OK160A_816_5_3.236.mgf |              | 0            | 0        | 0                | 0                | 190   | 204 |               |                          | PEAKS DB |
| K.TVELDTLLDKPQVHR.E         | Y    | 118.89 | 1877.9846 | 16     | -2.1 | 626.9982 | 3 | 37.06 | 2        | F2:96177 | 20210611-09_2021021-OK160A_816_5_3.236.mgf | 0            | 0            | 0        | 0                | 0                | 68    | 83  |               |                          | PEAKS DB |
| K.RGAEASEVLEADATSK.N        | Y    | 112.45 | 1734.7908 | 16     | 1.7  | 579.2694 | 3 | 23.57 | 2        | F2:72105 | 20210611-09_2021021-OK160A_816_5_3.236.mgf |              | 0            | 0        | 0                | 0                | 189   | 204 |               |                          | PEAKS DB |
| K.GIQTM(+15.99)EGGANSGR.F.S | Y    | 109.24 | 1439.6464 | 14     | -0.4 | 720.8271 | 2 | 21.32 | 2        | F2:68285 | 20210611-09_2021021-OK160A_816_5_3.236.mgf |              | 0            | 0        | 0                | 0                | 100   | 113 | Oxidation (M) | M5:Oxidation (M):1000.00 | PEAKS DB |
| K.GIQTMEGGANSGR.F.S         | Y    | 108.25 | 1423.6514 | 14     | 1.4  | 712.8310 | 2 | 27.59 | 2        | F2:79152 | 20210611-09_2021021-OK160A_816_5_3.236.mgf |              | 0            | 0        | 0                | 0                | 100   | 113 |               |                          | PEAKS DB |
| K.NSTQDEYGTAAAY.T           | Y    | 107.72 | 1446.6262 | 13     | 1.1  | 724.3181 | 2 | 19.51 | 2        | F2:65106 | 20210611-09_2021021-OK160A_816_5_3.236.mgf | 0            | 0            | 0        | 0                | 0                | 55    | 67  |               |                          | PEAKS DB |
| R.EVQGHESLFLK.S             | Y    | 101.21 | 1259.6146 | 11     | 0.9  | 630.8125 | 2 | 20.74 | 2        | F2:67101 | 20210611-09_2021021-OK160A_816_5_3.236.mgf |              | 0            | 0        | 0                | 0                | 84    | 94  |               |                          | PEAKS DB |
| R.E(-18.01)VQGHESLFLK.S     | Y    | 59.64  | 1241.6040 | 11     | 4.9  | 414.8756 | 3 | 20.82 | 2        | F2:67499 | 20210611-09_2021021-OK160A_816_5_3.236.mgf |              | 0            | 0        | 0                | 0                | 84    | 94  |               | E1:Pyro-glut E:1000.00   | PEAKS DB |
| R.IEQFEVK.D                 | Y    | 57.17  | 891.4702  | 7      | 3.7  | 446.7423 | 2 | 24.97 | 1        | F1:18135 | 20210611-08_2021021-OK192A_815_5_3.236.mgf | 0            | 0            | 0        | 0                | 0                | 8     | 14  |               |                          | PEAKS DB |

total 9 peptides

[back to list](#)

**Protein Coverage:**



□ Oxidation (M) (+15.99)

**total 8 peptides**





[illegible]

## OK006\_E\_298\_PDI

[| Protein Coverage](#) | [Supporting Peptides](#) |

1 MKMTGT

### Supporting Peptides:

## OK193\_E\_275\_PDI

[| Protein Coverage](#) | [Supporting Peptides](#) |

1 MKMTGTGLVL FSLAVAGVSA MYSPPDDVVD LTPTNFHSHV INGDELWIVE FYAPWCGHCQ SLAPEWKAA SALKGIVKVG  
81 AVNADEHNAL GGQYGVGR GFP TIKFFGQDKF NPQDYQGQRT AQGI VDFSIN QAK SVASARL SGKSGSDSKS KSGSGSK AGD  
161 PADVVELTDS NFEKEVLEHD GLVMVEFYAP WCGHCKNLAP QWAKAASELK GKVKLALDA TVHTVMANRY GVRGYPTIKA  
241 FPAGKKDGEA EDYDGGRTAS DIVQWAMEKA AANIPSPDVY EITSGEVLTD NCEGHQLCII SVLPQIYDCQ SECRNNYISI  
321 LKTLGEKFKK NQWGLWAEA GAQPALEQSL EVGGFGYPAL AAVNTRMKMF SLLRGQFSEK GINEFLRLDS YKGKSTSPLR  
401 NAELPKIEAR EPWDGRDAEL PVEEDIDLSD VDFDDKDEL

### Supporting Peptides:

**SRX1323887\_E\_251\_PDI**

[| Protein Coverage](#) | [Supporting Peptides](#) |

1. MKMTGT

### Supporting Peptides:

| Peptide                   | Uniq | -10lgP | Mass      | Length | ppm  | m/z       | z | RT    | Fraction | Scan      | Source File                                | Area ebraeus | Area judaeus | #Feature | #Feature ebraeus | #Feature judaeus | Start | End | PTM                       | AScore | Found By |
|---------------------------|------|--------|-----------|--------|------|-----------|---|-------|----------|-----------|--------------------------------------------|--------------|--------------|----------|------------------|------------------|-------|-----|---------------------------|--------|----------|
| K.AGDPADVVELTDSNFEK.E     | N    | 114.88 | 1805.8319 | 17     | 0.1  | 903.9195  | 2 | 42.83 | 2        | F2:106592 | 20210611-09_2021021-OK160A_816_5.3.236.mgf | 0            | 0            | 0        | 0                | 0                | 158   | 174 |                           |        | PEAKS DB |
| R.TAQGIVDFSINQAK.S        | N    | 101.65 | 1490.7728 | 14     | -1.6 | 746.3893  | 2 | 39.25 | 2        | F2:100088 | 20210611-09_2021021-OK160A_816_5.3.236.mgf |              | 0            | 0        | 0                | 0                | 120   | 133 |                           |        | PEAKS DB |
| K.DAELPVEEDIDLSDVDFDDKDEL | N    | 98.43  | 2635.1548 | 23     | 14.0 | 1318.5975 | 2 | 57.62 | 2        | F2:130012 | 20210611-09_2021021-OK160A_816_5.3.236.mgf |              | 0            | 0        | 0                | 0                | 417   | 439 |                           |        | PEAKS DB |
| K.NLAPQWAK.A              | N    | 74.58  | 926.4974  | 8      | 1.6  | 464.2548  | 2 | 27.41 | 2        | F2:78699  | 20210611-09_2021021-OK160A_816_5.3.236.mgf | 0            | 0            | 0        | 0                | 0                | 197   | 204 |                           |        | PEAKS DB |
| R.TASDIVQWAM(+15.99)EK.A  | N    | 73.10  | 1393.6548 | 12     | 2.4  | 697.8334  | 2 | 38.40 | 2        | F2:98771  | 20210611-09_2021021-OK160A_816_5.3.236.mgf |              | 0            | 0        | 0                | 0                | 258   | 269 | M10:Oxidation (M):1000.00 |        | PEAKS DB |
| K.FNPQDYQGQR.T            | Y    | 70.07  | 1251.5632 | 10     | 4.8  | 626.7896  | 2 | 22.75 | 1        | F1:14753  | 20210611-08_2021021-OK192A_815_5.3.236.mgf | 0            |              | 0        | 0                | 0                | 110   | 119 |                           |        | PEAKS DB |
| K.GINEFLR.D               | N    | 60.54  | 847.4552  | 7      | 0.1  | 424.7332  | 2 | 34.12 | 2        | F2:90614  | 20210611-09_2021021-OK160A_816_5.3.236.mgf |              | 0            | 0        | 0                | 0                | 381   | 387 |                           |        | PEAKS DB |
| total 8 peptides          |      |        |           |        |      |           |   |       |          |           |                                            |              |              |          |                  |                  |       |     |                           |        |          |

CV8\_286\_Protein

[back to list](#)

| [Protein Coverage](#) | [Supporting Peptides](#) |

Protein Coverage:

1 MLLAYFRPSA FTSPATMRRRA VILFSCIVLA VQASDVLEFT DSNFVSKIKE LDVALVEFYA PWCGHCKRLA PEYEVAATKL  
81 KSDPPVPLV KVDCTAETKT CQEYGVSGYP TLKIFKGGEF AKDYQGPRES KGIISTMQKE AGPASKLELD LKQYEDFLGR  
161 DTVCVVGFFA DADSEMAKTF SKLADTHEGD IRFGHTTASA IMDKAKYKDE VVLFRPKAMQ NKFEDSAVKF TGDATAKSAI  
241 KEFLTQEHLG MCGIRTMNNA GDFNKPTFVA FYDVDYVKNP KGSNYWRNRV MKVGKKLRDE GLKVFFGVSN KEEHSHELGE  
321 CGLQDAEGDK PIVCAYDEKN RKFKMEEEFV VDSFEKFVRG VLNGEVEAYL KSEPVPENND QPVKVVVAKN FEELVNDPEK  
401 DVLIEFYAPW CGHCKSLAPK YDELAEKLD ETDIVIAKMD ATANDPPSQY EVRGFPPTIYF APKGSKSSPK KYEGGREVND  
481 FIKYLAKEAT DELQGFDRKG KKKGGQKQKK KTEL

Supporting Peptides:

| Peptide                     | Uniq | -10lgP | Mass      | Length | ppm  | m/z      | z | RT    | Fraction | Scan      | Source File                                | Area ebraeus | Area judaeus | #Feature | #Feature ebraeus | #Feature judaeus | Start | End | PTM | AScore                           | Found By |
|-----------------------------|------|--------|-----------|--------|------|----------|---|-------|----------|-----------|--------------------------------------------|--------------|--------------|----------|------------------|------------------|-------|-----|-----|----------------------------------|----------|
| K.M(+15.99)DATANDPPSQYEVR.G | N    | 116.71 | 1708.7362 | 15     | -0.3 | 855.3715 | 2 | 23.22 | 2        | F2:71559  | 20210611-09_2021021-OK160A_816_5.3.236.mgf |              |              | 0        | 0                | 0                | 439   | 453 |     | M1:Oxidation (M):1000.00         | PEAKS DB |
| K.SEPVPENNDQPVK.V           | N    | 112.89 | 1451.6892 | 13     | 2.8  | 726.8509 | 2 | 19.00 | 2        | F2:64401  | 20210611-09_2021021-OK160A_816_5.3.236.mgf | 0            | 0            | 0        | 0                | 0                | 372   | 384 |     |                                  | PEAKS DB |
| K.MDATANDPPSQYEVR.G         | N    | 106.16 | 1692.7413 | 15     | 0.4  | 847.3748 | 2 | 26.03 | 2        | F2:76318  | 20210611-09_2021021-OK160A_816_5.3.236.mgf |              | 0            | 0        | 0                | 0                | 439   | 453 |     |                                  | PEAKS DB |
| K.EATDELQGFDR.K             | N    | 95.64  | 1279.5680 | 11     | 0.1  | 640.7886 | 2 | 29.87 | 2        | F2:83300  | 20210611-09_2021021-OK160A_816_5.3.236.mgf | 0            | 0            | 0        | 0                | 0                | 488   | 498 |     |                                  | PEAKS DB |
| R.GFPTIYFAPK.G              | N    | 86.32  | 1139.6014 | 10     | -0.9 | 570.8051 | 2 | 46.08 | 2        | F2:112594 | 20210611-09_2021021-OK160A_816_5.3.236.mgf | 0            | 0            | 0        | 0                | 0                | 454   | 463 |     |                                  | PEAKS DB |
| K.LKDETDIVIAK.M             | N    | 82.41  | 1243.7023 | 11     | 0.0  | 622.8558 | 2 | 25.53 | 2        | F2:75618  | 20210611-09_2021021-OK160A_816_5.3.236.mgf |              | 0            | 0        | 0                | 0                | 428   | 438 |     |                                  | PEAKS DB |
| K.YKDEVVLFPRK.A             | Y    | 80.21  | 1392.7765 | 11     | -2.0 | 465.2634 | 3 | 28.43 | 1        | F1:23179  | 20210611-08_2021021-OK192A_815_5.3.236.mgf | 0            |              | 0        | 0                | 0                | 207   | 217 |     |                                  | PEAKS DB |
| K.VFFGVSNK.E                | N    | 77.53  | 896.4756  | 8      | 2.5  | 449.2443 | 2 | 30.55 | 2        | F2:84259  | 20210611-09_2021021-OK160A_816_5.3.236.mgf | 0            | 0            | 0        | 0                | 0                | 304   | 311 |     |                                  | PEAKS DB |
| K.YDELAEK.L                 | N    | 64.80  | 866.4021  | 7      | 4.6  | 434.2085 | 2 | 16.53 | 2        | F2:60959  | 20210611-09_2021021-OK160A_816_5.3.236.mgf |              | 0            | 0        | 0                | 0                | 421   | 427 |     |                                  | PEAKS DB |
| K.QYEDFLGR.D                | N    | 64.14  | 1026.4771 | 8      | 3.1  | 514.2452 | 2 | 30.02 | 2        | F2:83542  | 20210611-09_2021021-OK160A_816_5.3.236.mgf |              | 0            | 0        | 0                | 0                | 153   | 160 |     |                                  | PEAKS DB |
| K.TC(+57.02)QEYGVSGYPTLK.I  | N    | 58.68  | 1601.7395 | 14     | 0.4  | 801.8740 | 2 | 32.78 | 2        | F2:88088  | 20210611-09_2021021-OK160A_816_5.3.236.mgf |              | 0            | 0        | 0                | 0                | 100   | 113 |     | C2:Carbamidomethylation:100.0.00 | PEAKS DB |
| total 11 peptides           |      |        |           |        |      |          |   |       |          |           |                                            |              |              |          |                  |                  |       |     |     |                                  |          |

V\_CG13\_228\_Protein

[back to list](#)

| [Protein Coverage](#) | [Supporting Peptides](#) |

Protein Coverage:

1 MLLAYFRPSA FTSPATMRRRA VILFSCIVLA VQASDVLEFT DLNFVSKIKE LDVALVEFYA PWCGHCKRLA PEYEVAATKL  
81 KSDPPVPLV KVDCTAETKT CQEYGVSGYP TLKIFKGGEF AKDYQGHRES KGIISTMQKE AGPASKELQD LKQYEDFLGR  
161 DTVCVVGFFA DADSEMAKTF RKLADTHEGD VRFGHTTASA IMDKAKYKDE VVLFRPKAMQ NKFEDSAVKF TGDATAKSAI  
241 KEFLTQEHLG MCGIRTMNNA GDFNKPTFVV FYDVDYVKNP KGSNYWRNRV MKVGKKLRDE GLKVFFGVSN KEEHSQELGE  
321 CGLQDAEGDK PIVCAYDEKN RKFKMEEEFV VDSFEKFVRG VLNGEVEAYL KSEPVPENND QPVKVVVAKN FEELVNDPEK  
401 DVLIEFYAPW CGHCKSLAPK YDELAEKLD ETDIVIAKMD ATANDPPSQY EVRGFPPTIYF APKGSKSSPK KYEGGREVND  
481 FIKYLAKEAT DELQGFDRKG KKKGGQKQKK KTEL

Supporting Peptides:

| Peptide                     | Uniq | -10lgP | Mass      | Length | ppm  | m/z      | z | RT    | Fraction | Scan      | Source File                                | Area ebraeus | Area judaeus | #Feature | #Feature ebraeus | #Feature judaeus | Start | End | PTM | AScore                           | Found By |
|-----------------------------|------|--------|-----------|--------|------|----------|---|-------|----------|-----------|--------------------------------------------|--------------|--------------|----------|------------------|------------------|-------|-----|-----|----------------------------------|----------|
| K.M(+15.99)DATANDPPSQYEVR.G | N    | 116.71 | 1708.7362 | 15     | -0.3 | 855.3715 | 2 | 23.22 | 2        | F2:71559  | 20210611-09_2021021-OK160A_816_5.3.236.mgf |              | 0            | 0        | 0                | 0                | 439   | 453 |     | M1:Oxidation (M):1000.00         | PEAKS DB |
| K.SEPVPENNDQPVK.V           | N    | 112.89 | 1451.6892 | 13     | 2.8  | 726.8509 | 2 | 19.00 | 2        | F2:64401  | 20210611-09_2021021-OK160A_816_5.3.236.mgf | 0            | 0            | 0        | 0                | 0                | 372   | 384 |     |                                  | PEAKS DB |
| K.MDATANDPPSQYEVR.G         | N    | 106.16 | 1692.7413 | 15     | 0.4  | 847.3748 | 2 | 26.03 | 2        | F2:76318  | 20210611-09_2021021-OK160A_816_5.3.236.mgf |              | 0            | 0        | 0                | 0                | 439   | 453 |     |                                  | PEAKS DB |
| K.EATDELQGFDR.K             | N    | 95.64  | 1279.5680 | 11     | 0.1  | 640.7886 | 2 | 29.87 | 2        | F2:83300  | 20210611-09_2021021-OK160A_816_5.3.236.mgf | 0            | 0            | 0        | 0                | 0                | 488   | 498 |     |                                  | PEAKS DB |
| R.GFPTIYFAPK.G              | N    | 86.32  | 1139.6014 | 10     | -0.9 | 570.8051 | 2 | 46.08 | 2        | F2:112594 | 20210611-09_2021021-OK160A_816_5.3.236.mgf | 0            | 0            | 0        | 0                | 0                | 454   | 463 |     |                                  | PEAKS DB |
| K.LKDETIVIAK.M              | N    | 82.41  | 1243.7023 | 11     | 0.0  | 622.8558 | 2 | 25.53 | 2        | F2:75618  | 20210611-09_2021021-OK160A_816_5.3.236.mgf |              | 0            | 0        | 0                | 0                | 428   | 438 |     |                                  | PEAKS DB |
| K.YKDEVVLFPRK.A             | Y    | 80.21  | 1392.7765 | 11     | -2.0 | 465.2634 | 3 | 28.43 | 1        | F1:23179  | 20210611-08_2021021-OK192A_815_5.3.236.mgf | 0            |              | 0        | 0                | 0                | 207   | 217 |     |                                  | PEAKS DB |
| K.VFFGVSNK.E                | N    | 77.53  | 896.4756  | 8      | 2.5  | 449.2443 | 2 | 30.55 | 2        | F2:84259  | 20210611-09_2021021-OK160A_816_5.3.236.mgf | 0            | 0            | 0        | 0                | 0                | 304   | 311 |     |                                  | PEAKS DB |
| K.YDELAEK.L                 | N    | 64.80  | 866.4021  | 7      | 4.6  | 434.2085 | 2 | 16.53 | 2        | F2:60959  | 20210611-09_2021021-OK160A_816_5.3.236.mgf |              | 0            | 0        | 0                | 0                | 421   | 427 |     |                                  | PEAKS DB |
| K.QYEDFLGR.D                | N    | 64.14  | 1026.4771 | 8      | 3.1  | 514.2452 | 2 | 30.02 | 2        | F2:83542  | 20210611-09_2021021-OK160A_816_5.3.236.mgf |              | 0            | 0        | 0                | 0                | 153   | 160 |     |                                  | PEAKS DB |
| K.TC(+57.02)QEYGVSGYPTLK.I  | N    | 58.68  | 1601.7395 | 14     | 0.4  | 801.8740 | 2 | 32.78 | 2        | F2:88088  | 20210611-09_2021021-OK160A_816_5.3.236.mgf |              | 0            | 0        | 0                | 0                | 100   | 113 |     | C2:Carbamidomethylation:100.0.00 | PEAKS DB |
| total 11 peptides           |      |        |           |        |      |          |   |       |          |           |                                            |              |              |          |                  |                  |       |     |     |                                  |          |

A\_1387\_037

[back to list](#)

| [Protein Coverage](#) | [Supporting Peptides](#) |

Protein Coverage:

1 MSPATMRRAV ILFSCIVLAV QASDVLEFTD SNFVSKIKEL DVALVEFYAP WCGHCKRLAP EYEVAATKLK KSDPPVPLVK  
81 VDCTAETK**TC QEYGVSGYPT LK**IFKGGEFA KDYQGPRESK GIISTMQKEA GPASKELEDL **KQYEDFLGR**D TVCVVGFFAD  
161 ADSQMAKTF S KLADTHEGDI RFGHTTASAI MDKAK**YKDEV VLF**RPKAMQN KFEDSAVKFT GDATAKSAIK EFLTQEHLGM  
241 CGIRTMNNA G DFNKPTFVAF YDVDYVKNPK GSNYWRNRVM KVGKKLRDEG **LKVFFGVS**NK EEHSQELGEC GLQDAEGDKP  
321 IVCA YDEKNR KFKMEEEFVS DSFEKFVRGV LNGEVEAYLK **SEVPENNDQ PVK**VVAKNF EELVNDPEKD VLIEFYAPWC  
401 GHCKSLAPK**Y DELAE**KLKDE **TDIVIAKMDA TAN**PPSQYE **VRGFPTIYFA PK**GSKSSPKK YEGGREVNDF IKYLAK**EATD**  
481 **ELQGFDR**KGK KKGQKQKKK TEL

Supporting Peptides:

| Peptide                     | Uniq | -10lgP | Mass      | Length | ppm  | m/z      | z | RT    | Fraction | Scan      | Source File                                | Area ebraeus | Area judaeus | #Feature | #Feature ebraeus | #Feature judaeus | Start | End | PTM | AScore                           | Found By |
|-----------------------------|------|--------|-----------|--------|------|----------|---|-------|----------|-----------|--------------------------------------------|--------------|--------------|----------|------------------|------------------|-------|-----|-----|----------------------------------|----------|
| K.M(+15.99)DATANDPPSQYEVR.G | N    | 116.71 | 1708.7362 | 15     | -0.3 | 855.3715 | 2 | 23.22 | 2        | F2:71559  | 20210611-09_2021021-OK160A_816_5.3.236.mgf |              | 0            | 0        | 0                | 0                | 428   | 442 |     | M1:Oxidation (M):1000.00         | PEAKS DB |
| K.SEPVPENNDQPVK.V           | N    | 112.89 | 1451.6892 | 13     | 2.8  | 726.8509 | 2 | 19.00 | 2        | F2:64401  | 20210611-09_2021021-OK160A_816_5.3.236.mgf | 0            | 0            | 0        | 0                | 0                | 361   | 373 |     |                                  | PEAKS DB |
| K.MDATANDPPSQYEVR.G         | N    | 106.16 | 1692.7413 | 15     | 0.4  | 847.3748 | 2 | 26.03 | 2        | F2:76318  | 20210611-09_2021021-OK160A_816_5.3.236.mgf |              | 0            | 0        | 0                | 0                | 428   | 442 |     |                                  | PEAKS DB |
| K.EATDELQGFDR.K             | N    | 95.64  | 1279.5680 | 11     | 0.1  | 640.7886 | 2 | 29.87 | 2        | F2:83300  | 20210611-09_2021021-OK160A_816_5.3.236.mgf | 0            | 0            | 0        | 0                | 0                | 477   | 487 |     |                                  | PEAKS DB |
| R.GFPTIYFAPK.G              | N    | 86.32  | 1139.6014 | 10     | -0.9 | 570.8051 | 2 | 46.08 | 2        | F2:112594 | 20210611-09_2021021-OK160A_816_5.3.236.mgf | 0            | 0            | 0        | 0                | 0                | 443   | 452 |     |                                  | PEAKS DB |
| K.LKDETDIVIAK.M             | N    | 82.41  | 1243.7023 | 11     | 0.0  | 622.8558 | 2 | 25.53 | 2        | F2:75618  | 20210611-09_2021021-OK160A_816_5.3.236.mgf |              | 0            | 0        | 0                | 0                | 417   | 427 |     |                                  | PEAKS DB |
| K.YKDEVVLFRPK.A             | Y    | 80.21  | 1392.7765 | 11     | -2.0 | 465.2634 | 3 | 28.43 | 1        | F1:23179  | 20210611-08_2021021-OK192A_815_5.3.236.mgf | 0            |              | 0        | 0                | 0                | 196   | 206 |     |                                  | PEAKS DB |
| K.VFFGVSNK.E                | N    | 77.53  | 896.4756  | 8      | 2.5  | 449.2443 | 2 | 30.55 | 2        | F2:84259  | 20210611-09_2021021-OK160A_816_5.3.236.mgf | 0            | 0            | 0        | 0                | 0                | 293   | 300 |     |                                  | PEAKS DB |
| K.YDELAEK.L                 | N    | 64.80  | 866.4021  | 7      | 4.6  | 434.2085 | 2 | 16.53 | 2        | F2:60959  | 20210611-09_2021021-OK160A_816_5.3.236.mgf |              | 0            | 0        | 0                | 0                | 410   | 416 |     |                                  | PEAKS DB |
| K.QYEDFLGR.D                | N    | 64.14  | 1026.4771 | 8      | 3.1  | 514.2452 | 2 | 30.02 | 2        | F2:83542  | 20210611-09_2021021-OK160A_816_5.3.236.mgf |              | 0            | 0        | 0                | 0                | 142   | 149 |     |                                  | PEAKS DB |
| K.TC(+57.02)QEYGVSGYPTLK.I  | N    | 58.68  | 1601.7395 | 14     | 0.4  | 801.8740 | 2 | 32.78 | 2        | F2:88088  | 20210611-09_2021021-OK160A_816_5.3.236.mgf |              | 0            | 0        | 0                | 0                | 89    | 102 |     | C2:Carbamidomethylation:100 0.00 | PEAKS DB |
| total 11 peptides           |      |        |           |        |      |          |   |       |          |           |                                            |              |              |          |                  |                  |       |     |     |                                  |          |

A\_0025\_374\_Protein

[back to list](#)

| [Protein Coverage](#) | [Supporting Peptides](#) |

Protein Coverage:

1 MRRAVILFSC IVLAVQASDV LEFTDSNFVS KIKELDVALV EFYAPWCGHC KRLAPEYEVA ATKLKSDPP VPLVKVDCTA  
81 ET**KTCQEYGV SG**YPTLK**IFK** GGEFAKDYQG PRESKGIIST MQKEAGPASK ELEDLK**QYED FLGR**DTVCVV GFFADADSQM  
161 AKTFSKLADT HEGDIRFGHT TASAIMDKAK **YKDEVVLF**RPK **KAMQ**NKFEDS AVKFTGNATK KSAIKEFLTQ EHLGIGGIRT  
241 MNNAGD FNKP TFVAFYDV D Y VKNPKG S NYW RNRVMKV GKK LRDEGLK**VFF GVS**NKEEHS ELGECGLQDA EGDKPIVCAY  
321 DEKNRKFME EFVS D SFEK FVRGVLNGEV EAYLK**SEVP**E**ENNDQPV**KVV VAKNFEELVN DPEKDV LIEF YAPWCGHCKS  
401 LAPK**YDELA**E KLKDETDIV I AKMDATAND **P**SQYEVR**GFPTIYFA**PK GSK SSPKKYEGGR EVNDFIKYLA **KEATDELQGF**  
481 **DR**KGKKKGGQ KQKKKTEL

Supporting Peptides:

| Peptide                     | Uniq | -10lgP | Mass      | Length | ppm  | m/z      | z | RT    | Fraction | Scan      | Source File                                | Area ebraeus | Area judaeus | #Feature | #Feature ebraeus | #Feature judaeus | Start | End | PTM | AScore                           | Found By |
|-----------------------------|------|--------|-----------|--------|------|----------|---|-------|----------|-----------|--------------------------------------------|--------------|--------------|----------|------------------|------------------|-------|-----|-----|----------------------------------|----------|
| K.M(+15.99)DATANDPPSQYEVR.G | N    | 116.71 | 1708.7362 | 15     | -0.3 | 855.3715 | 2 | 23.22 | 2        | F2:71559  | 20210611-09_2021021-OK160A_816_5.3.236.mgf |              |              | 0        | 0                | 0                | 423   | 437 |     | M1:Oxidation (M):1000.00         | PEAKS DB |
| K.SEPVPENNDQPVK.V           | N    | 112.89 | 1451.6892 | 13     | 2.8  | 726.8509 | 2 | 19.00 | 2        | F2:64401  | 20210611-09_2021021-OK160A_816_5.3.236.mgf | 0            | 0            | 0        | 0                | 0                | 356   | 368 |     |                                  | PEAKS DB |
| K.MDATANDPPSQYEVR.G         | N    | 106.16 | 1692.7413 | 15     | 0.4  | 847.3748 | 2 | 26.03 | 2        | F2:76318  | 20210611-09_2021021-OK160A_816_5.3.236.mgf |              | 0            | 0        | 0                | 0                | 423   | 437 |     |                                  | PEAKS DB |
| K.EATDELQGFDR.K             | N    | 95.64  | 1279.5680 | 11     | 0.1  | 640.7886 | 2 | 29.87 | 2        | F2:83300  | 20210611-09_2021021-OK160A_816_5.3.236.mgf | 0            | 0            | 0        | 0                | 0                | 472   | 482 |     |                                  | PEAKS DB |
| R.GFPTIYFAPK.G              | N    | 86.32  | 1139.6014 | 10     | -0.9 | 570.8051 | 2 | 46.08 | 2        | F2:112594 | 20210611-09_2021021-OK160A_816_5.3.236.mgf | 0            | 0            | 0        | 0                | 0                | 438   | 447 |     |                                  | PEAKS DB |
| K.LKDETDIVIAK.M             | N    | 82.41  | 1243.7023 | 11     | 0.0  | 622.8558 | 2 | 25.53 | 2        | F2:75618  | 20210611-09_2021021-OK160A_816_5.3.236.mgf |              | 0            | 0        | 0                | 0                | 412   | 422 |     |                                  | PEAKS DB |
| K.YKDEVVLFRPK.A             | Y    | 80.21  | 1392.7765 | 11     | -2.0 | 465.2634 | 3 | 28.43 | 1        | F1:23179  | 20210611-08_2021021-OK192A_815_5.3.236.mgf | 0            |              | 0        | 0                | 0                | 191   | 201 |     |                                  | PEAKS DB |
| K.VFFGVSNK.E                | N    | 77.53  | 896.4756  | 8      | 2.5  | 449.2443 | 2 | 30.55 | 2        | F2:84259  | 20210611-09_2021021-OK160A_816_5.3.236.mgf | 0            | 0            | 0        | 0                | 0                | 288   | 295 |     |                                  | PEAKS DB |
| K.YDELAEK.L                 | N    | 64.80  | 866.4021  | 7      | 4.6  | 434.2085 | 2 | 16.53 | 2        | F2:60959  | 20210611-09_2021021-OK160A_816_5.3.236.mgf |              | 0            | 0        | 0                | 0                | 405   | 411 |     |                                  | PEAKS DB |
| K.QYEDFLGR.D                | N    | 64.14  | 1026.4771 | 8      | 3.1  | 514.2452 | 2 | 30.02 | 2        | F2:83542  | 20210611-09_2021021-OK160A_816_5.3.236.mgf |              | 0            | 0        | 0                | 0                | 137   | 144 |     |                                  | PEAKS DB |
| K.TC(+57.02)QEYGVSGYPTLK.I  | N    | 58.68  | 1601.7395 | 14     | 0.4  | 801.8740 | 2 | 32.78 | 2        | F2:88088  | 20210611-09_2021021-OK160A_816_5.3.236.mgf |              | 0            | 0        | 0                | 0                | 84    | 97  |     | C2:Carbamidomethylation:100 0.00 | PEAKS DB |
| total 11 peptides           |      |        |           |        |      |          |   |       |          |           |                                            |              |              |          |                  |                  |       |     |     |                                  |          |

A\_0885\_194\_Protein

[back to list](#)

| [Protein Coverage](#) | [Supporting Peptides](#) |

Protein Coverage:

1 MLLAYFRPSA FTSPATMRR A VILFSCIVLA VQASDVLEFT DSNFVSKIKE LDVALVEFYA PWCGHCKRLA PEYEVAATKL  
81 KSDPPVPLV KVDCTAET**KTC QEYGVSGYPT LK**IFKGGEF AKDYQGPRES KGIINTMQKE AGPASKELED **LKQYEDFLGR**  
161 DTVCVVGFFA DADSQMAKTF SKLADTHEGD IRFGHTTASA IMDKAK**YKDE VVL**FRPKAMQ NKFEDSAVKF TGDATKSAI  
241 KEFLTQEHLG ICGIRTMNNA GDFNKP TFV A FYDV D Y VKNPKG S NYW RNRVMKV GKK LRDEGLK**VFFGVS**N KEEHSHELGE  
321 CGLQDAEGDK PIVCAYDEKN RKFKEEEFS VDSFEKFVRG VLNGEVEAYL **KSEVPENND QPV**KVVAKN FEELVNDPEK  
401 DV LIEFYAPW CGHCKSLAPK **YDELA**EKLKD ETDIVIAKMD ATANDPPSQY **EV**RGFPTIYF **APK**GSKSSPK KYEGGREVN D  
481 FIKYLAK**EAT DELQGFDR**KG KKGQKQKK KTEL

Supporting Peptides:

| Peptide                     | Uniq | -10lgP | Mass      | Length | ppm  | m/z      | z | RT    | Fraction | Scan     | Source File                                | Area ebraeus | Area judaeus | #Feature | #Feature ebraeus | #Feature judaeus | Start | End | PTM | AScore                   | Found By |
|-----------------------------|------|--------|-----------|--------|------|----------|---|-------|----------|----------|--------------------------------------------|--------------|--------------|----------|------------------|------------------|-------|-----|-----|--------------------------|----------|
| K.M(+15.99)DATANDPPSQYEVR.G | N    | 116.71 | 1708.7362 | 15     | -0.3 | 855.3715 | 2 | 23.22 | 2        | F2:71559 | 20210611-09_2021021-OK160A_816_5.3.236.mgf |              | 0            | 0        | 0                | 0                | 439   | 453 |     | M1:Oxidation (M):1000.00 | PEAKS DB |
| K.SEPVPENNDQPVK.V           | N    | 112.89 | 1451.6892 | 13     | 2.8  | 726.8509 | 2 | 19.00 | 2        | F2:64401 | 20210611-09_2021021-OK160A_816_5.3.236.mgf | 0            | 0            | 0        | 0                | 0                | 372   | 384 |     |                          | PEAKS DB |

total 11 peptides

| Peptide                    | Uniq | -10lgP | Mass      | Length | ppm  | m/z      | z | RT    | Fraction | Scan      | Source File                                | Area ebraeus | Area judaeus | #Feature | #Feature ebraeus | #Feature judaeus | Start | End | PTM | AScore                           | Found By |
|----------------------------|------|--------|-----------|--------|------|----------|---|-------|----------|-----------|--------------------------------------------|--------------|--------------|----------|------------------|------------------|-------|-----|-----|----------------------------------|----------|
| K.MDATANDPPSQYEVR.G        | N    | 106.16 | 1692.7413 | 15     | 0.4  | 847.3748 | 2 | 26.03 | 2        | F2:76318  | 20210611-09_2021021-OK160A_816_5.3.236.mgf |              | 0            | 0        | 0                | 0                | 439   | 453 |     |                                  | PEAKS DB |
| K.EATDELQGFDR.K            | N    | 95.64  | 1279.5680 | 11     | 0.1  | 640.7886 | 2 | 29.87 | 2        | F2:83300  | 20210611-09_2021021-OK160A_816_5.3.236.mgf | 0            | 0            | 0        | 0                | 0                | 488   | 498 |     |                                  | PEAKS DB |
| R.GFPTIYFAPK.G             | N    | 86.32  | 1139.6014 | 10     | -0.9 | 570.8051 | 2 | 46.08 | 2        | F2:112594 | 20210611-09_2021021-OK160A_816_5.3.236.mgf | 0            | 0            | 0        | 0                | 0                | 454   | 463 |     |                                  | PEAKS DB |
| K.LKETDVIQAK.M             | N    | 82.41  | 1243.7023 | 11     | 0.0  | 622.8558 | 2 | 25.53 | 2        | F2:75618  | 20210611-09_2021021-OK160A_816_5.3.236.mgf |              | 0            | 0        | 0                | 0                | 428   | 438 |     |                                  | PEAKS DB |
| K.YKDEVVLFPRK.A            | Y    | 80.21  | 1392.7765 | 11     | -2.0 | 465.2634 | 3 | 28.43 | 1        | F1:23179  | 20210611-08_2021021-OK192A_815_5.3.236.mgf | 0            |              | 0        | 0                | 0                | 207   | 217 |     |                                  | PEAKS DB |
| K.VVFGVSNK.E               | N    | 77.53  | 896.4756  | 8      | 2.5  | 449.2443 | 2 | 30.55 | 2        | F2:84259  | 20210611-09_2021021-OK160A_816_5.3.236.mgf | 0            | 0            | 0        | 0                | 0                | 304   | 311 |     |                                  | PEAKS DB |
| K.YDELAEK.L                | N    | 64.80  | 866.4021  | 7      | 4.6  | 434.2085 | 2 | 16.53 | 2        | F2:60959  | 20210611-09_2021021-OK160A_816_5.3.236.mgf |              | 0            | 0        | 0                | 0                | 421   | 427 |     |                                  | PEAKS DB |
| K.QYEDFLGR.D               | N    | 64.14  | 1026.4771 | 8      | 3.1  | 514.2452 | 2 | 30.02 | 2        | F2:83542  | 20210611-09_2021021-OK160A_816_5.3.236.mgf |              | 0            | 0        | 0                | 0                | 153   | 160 |     |                                  | PEAKS DB |
| K.TC(+57.02)QEYGVSGYPTLK.I | N    | 58.68  | 1601.7395 | 14     | 0.4  | 801.8740 | 2 | 32.78 | 2        | F2:88088  | 20210611-09_2021021-OK160A_816_5.3.236.mgf |              | 0            | 0        | 0                | 0                | 100   | 113 |     | C2:Carbamidomethylation:100 0.00 | PEAKS DB |
| total 11 peptides          |      |        |           |        |      |          |   |       |          |           |                                            |              |              |          |                  |                  |       |     |     |                                  |          |

A\_0855\_188\_Protein

[back to list](#)

| [Protein Coverage](#) | [Supporting Peptides](#) |

Protein Coverage:

1 LLAYFRPSAF MSPATMRRRAV ILFSCIVLAV QASDVLEFTD SNFVSKIKEL DVALVEFYAP WCGHCKRLAP EYEVAATKLK  
81 KSDPPVPLVK VDCTAETK**TC QEYGVSGYPT LK**IFKGGEFA KDYQGPRESK GIISTMQKEA GPASKELEDL **KQYEDFLGRD**  
161 TVCVVGFFAD ADSQMAKTF S KLADTHEGDI RFGHTTASAI MDKAK**YKDEV VLFPRK**AMQN KFEDSAVKFT GDATAKSSAIK  
241 EFLTQEHLGM CGIRTMMNAG DFNKPTFAF YDVDYVKNPK GSNYWRNRVM KVGKKLRDEG **LKVVFGVSNK** EEHSHELGE C  
321 GLQDAEGDKP IVCAYDEKNR KFKMEEFSV DSFEKFRGVG LNGEVEAYLK **SEVPVENDQ PVK**VVVAKFN EELVNDPEKD  
401 VLIEFYAPWC GHCKSLAPK**Y DELAEK**LKDE TDIVIAKM**DA TANDPPSQYE VRGFPTIYFA** PKGSKSSPKK YEGGREVNDF  
481 IKYLAK**EATD ELQGFDR**KGK KKGQKQKKK TEL

Supporting Peptides:

| Peptide                     | Uniq | -10lgP | Mass      | Length | ppm  | m/z      | z | RT    | Fraction | Scan      | Source File                                | Area ebraeus | Area judaeus | #Feature | #Feature ebraeus | #Feature judaeus | Start | End | PTM                      | AScore                           | Found By |
|-----------------------------|------|--------|-----------|--------|------|----------|---|-------|----------|-----------|--------------------------------------------|--------------|--------------|----------|------------------|------------------|-------|-----|--------------------------|----------------------------------|----------|
| K.M(+15.99)DATANDPPSQYEVR.G | N    | 116.71 | 1708.7362 | 15     | -0.3 | 855.3715 | 2 | 23.22 | 2        | F2:71559  | 20210611-09_2021021-OK160A_816_5.3.236.mgf |              | 0            | 0        | 0                | 0                | 438   | 452 | M1:Oxidation (M):1000.00 |                                  | PEAKS DB |
| K.SEPVPENNDQPVK.V           | N    | 112.89 | 1451.6892 | 13     | 2.8  | 726.8509 | 2 | 19.00 | 2        | F2:64401  | 20210611-09_2021021-OK160A_816_5.3.236.mgf | 0            | 0            | 0        | 0                | 0                | 371   | 383 |                          |                                  | PEAKS DB |
| K.MDATANDPPSQYEVR.G         | N    | 106.16 | 1692.7413 | 15     | 0.4  | 847.3748 | 2 | 26.03 | 2        | F2:76318  | 20210611-09_2021021-OK160A_816_5.3.236.mgf |              | 0            | 0        | 0                | 0                | 438   | 452 |                          |                                  | PEAKS DB |
| K.EATDELQGFDR.K             | N    | 95.64  | 1279.5680 | 11     | 0.1  | 640.7886 | 2 | 29.87 | 2        | F2:83300  | 20210611-09_2021021-OK160A_816_5.3.236.mgf | 0            | 0            | 0        | 0                | 0                | 487   | 497 |                          |                                  | PEAKS DB |
| R.GFPTIYFAPK.G              | N    | 86.32  | 1139.6014 | 10     | -0.9 | 570.8051 | 2 | 46.08 | 2        | F2:112594 | 20210611-09_2021021-OK160A_816_5.3.236.mgf | 0            | 0            | 0        | 0                | 0                | 453   | 462 |                          |                                  | PEAKS DB |
| K.LKETDVIQAK.M              | N    | 82.41  | 1243.7023 | 11     | 0.0  | 622.8558 | 2 | 25.53 | 2        | F2:75618  | 20210611-09_2021021-OK160A_816_5.3.236.mgf |              | 0            | 0        | 0                | 0                | 427   | 437 |                          |                                  | PEAKS DB |
| K.YKDEVVLFPRK.A             | Y    | 80.21  | 1392.7765 | 11     | -2.0 | 465.2634 | 3 | 28.43 | 1        | F1:23179  | 20210611-08_2021021-OK192A_815_5.3.236.mgf | 0            |              | 0        | 0                | 0                | 206   | 216 |                          |                                  | PEAKS DB |
| K.VVFGVSNK.E                | N    | 77.53  | 896.4756  | 8      | 2.5  | 449.2443 | 2 | 30.55 | 2        | F2:84259  | 20210611-09_2021021-OK160A_816_5.3.236.mgf | 0            | 0            | 0        | 0                | 0                | 303   | 310 |                          |                                  | PEAKS DB |
| K.YDELAEK.L                 | N    | 64.80  | 866.4021  | 7      | 4.6  | 434.2085 | 2 | 16.53 | 2        | F2:60959  | 20210611-09_2021021-OK160A_816_5.3.236.mgf |              | 0            | 0        | 0                | 0                | 420   | 426 |                          |                                  | PEAKS DB |
| K.QYEDFLGR.D                | N    | 64.14  | 1026.4771 | 8      | 3.1  | 514.2452 | 2 | 30.02 | 2        | F2:83542  | 20210611-09_2021021-OK160A_816_5.3.236.mgf |              | 0            | 0        | 0                | 0                | 152   | 159 |                          |                                  | PEAKS DB |
| K.TC(+57.02)QEYGVSGYPTLK.I  | N    | 58.68  | 1601.7395 | 14     | 0.4  | 801.8740 | 2 | 32.78 | 2        | F2:88088  | 20210611-09_2021021-OK160A_816_5.3.236.mgf |              | 0            | 0        | 0                | 0                | 99    | 112 |                          | C2:Carbamidomethylation:100 0.00 | PEAKS DB |
| total 11 peptides           |      |        |           |        |      |          |   |       |          |           |                                            |              |              |          |                  |                  |       |     |                          |                                  |          |

A\_0048\_031\_Protein

[back to list](#)

| [Protein Coverage](#) | [Supporting Peptides](#) |

Protein Coverage:

1 MLLAYFRPSA FMSPATMRRRA VILFSCIVLA VQASDVLEFT DSNFVSKIKE LDVALVEFYA PWCGHCKRLA PEYEVAATKL  
81 KSDPPVPLV KVDCTAETK**T CQEYGVSGYP TLK**IFKGGEF AKDYQGPRES KGIISTMQKE AGPASKELED **LKQYEDFLGR**  
161 DTVCVVGFFA DADSQMAKTF SKLADTHEGD IRFGHTTASA IMDKAK**YKDE VVLFPRK**AMQ NKFEDSAVKF TGNATKSSAI  
241 KEFLTQEHLG ICGIRTMNNA GDFNKPTFVA FYDVDYVKNP KGSNYWRNRV MKVGKKLRDE GLK**VVFGVSN** KEEHSHELGE  
321 CGLQDAEGDK PIVCAYDEKN RKFKMEEEF S VDSFEKFRVG VLNGEVEAYL **KSEVPVEND QPVK**VVAKN FEELVNDPEK  
401 DVLIEFYAPW CGHCKSLAPK **YDELAEK**LKD ETDIVIAK**MD ATANDPPSQY EVRGFPPTIYF** APKGSKSSPK KYEGGREVND  
481 FIKYLAK**EAT DELQGFDR**KG KKGQKQKK KTEL

Supporting Peptides:

| Peptide                     | Uniq | -10lgP | Mass      | Length | ppm  | m/z      | z | RT    | Fraction | Scan      | Source File                                | Area ebraeus | Area judaeus | #Feature | #Feature ebraeus | #Feature judaeus | Start | End | PTM                      | AScore                           | Found By |
|-----------------------------|------|--------|-----------|--------|------|----------|---|-------|----------|-----------|--------------------------------------------|--------------|--------------|----------|------------------|------------------|-------|-----|--------------------------|----------------------------------|----------|
| K.M(+15.99)DATANDPPSQYEVR.G | N    | 116.71 | 1708.7362 | 15     | -0.3 | 855.3715 | 2 | 23.22 | 2        | F2:71559  | 20210611-09_2021021-OK160A_816_5.3.236.mgf |              | 0            | 0        | 0                | 0                | 439   | 453 | M1:Oxidation (M):1000.00 |                                  | PEAKS DB |
| K.SEPVPENNDQPVK.V           | N    | 112.89 | 1451.6892 | 13     | 2.8  | 726.8509 | 2 | 19.00 | 2        | F2:64401  | 20210611-09_2021021-OK160A_816_5.3.236.mgf | 0            | 0            | 0        | 0                | 0                | 372   | 384 |                          |                                  | PEAKS DB |
| K.MDATANDPPSQYEVR.G         | N    | 106.16 | 1692.7413 | 15     | 0.4  | 847.3748 | 2 | 26.03 | 2        | F2:76318  | 20210611-09_2021021-OK160A_816_5.3.236.mgf |              | 0            | 0        | 0                | 0                | 439   | 453 |                          |                                  | PEAKS DB |
| K.EATDELQGFDR.K             | N    | 95.64  | 1279.5680 | 11     | 0.1  | 640.7886 | 2 | 29.87 | 2        | F2:83300  | 20210611-09_2021021-OK160A_816_5.3.236.mgf | 0            | 0            | 0        | 0                | 0                | 488   | 498 |                          |                                  | PEAKS DB |
| R.GFPTIYFAPK.G              | N    | 86.32  | 1139.6014 | 10     | -0.9 | 570.8051 | 2 | 46.08 | 2        | F2:112594 | 20210611-09_2021021-OK160A_816_5.3.236.mgf | 0            | 0            | 0        | 0                | 0                | 454   | 463 |                          |                                  | PEAKS DB |
| K.LKETDVIQAK.M              | N    | 82.41  | 1243.7023 | 11     | 0.0  | 622.8558 | 2 | 25.53 | 2        | F2:75618  | 20210611-09_2021021-OK160A_816_5.3.236.mgf |              | 0            | 0        | 0                | 0                | 428   | 438 |                          |                                  | PEAKS DB |
| K.YKDEVVLFPRK.A             | Y    | 80.21  | 1392.7765 | 11     | -2.0 | 465.2634 | 3 | 28.43 | 1        | F1:23179  | 20210611-08_2021021-OK192A_815_5.3.236.mgf | 0            |              | 0        | 0                | 0                | 207   | 217 |                          |                                  | PEAKS DB |
| K.VVFGVSNK.E                | N    | 77.53  | 896.4756  | 8      | 2.5  | 449.2443 | 2 | 30.55 | 2        | F2:84259  | 20210611-09_2021021-OK160A_816_5.3.236.mgf | 0            | 0            | 0        | 0                | 0                | 304   | 311 |                          |                                  | PEAKS DB |
| K.YDELAEK.L                 | N    | 64.80  | 866.4021  | 7      | 4.6  | 434.2085 | 2 | 16.53 | 2        | F2:60959  | 20210611-09_2021021-OK160A_816_5.3.236.mgf |              | 0            | 0        | 0                | 0                | 421   | 427 |                          |                                  | PEAKS DB |
| K.QYEDFLGR.D                | N    | 64.14  | 1026.4771 | 8      | 3.1  | 514.2452 | 2 | 30.02 | 2        | F2:83542  | 20210611-09_2021021-OK160A_816_5.3.236.mgf |              | 0            | 0        | 0                | 0                | 153   | 160 |                          |                                  | PEAKS DB |
| K.TC(+57.02)QEYGVSGYPTLK.I  | N    | 58.68  | 1601.7395 | 14     | 0.4  | 801.8740 | 2 | 32.78 | 2        | F2:88088  | 20210611-09_2021021-OK160A_816_5.3.236.mgf |              | 0            | 0        | 0                | 0                | 100   | 113 |                          | C2:Carbamidomethylation:100 0.00 | PEAKS DB |
| total 11 peptides           |      |        |           |        |      |          |   |       |          |           |                                            |              |              |          |                  |                  |       |     |                          |                                  |          |

D\_070\_Calreticulin-like

[back to list](#)

| [Protein Coverage](#) | [Supporting Peptides](#) |

Protein Coverage:



### Supporting Peptides:

[illegible]

[back to list](#)

### Protein Coverage:

### Supporting Peptides:

[illegible]

[back to list](#)

### Protein Coverage:

### Supporting Peptides:

[illegible][back to list](#)

### Protein Coverage:

### Supporting Peptides:

| Peptide          | Uniq | -10lgP | Mass | Length | ppm | m/z | z | RT | Fraction | Scan | Source File | Area<br>ebraeus | Area<br>judaeus | #Feature | #Feature<br>ebraeus | #Feature<br>judaeus | Start | End | PTM | AScore | Found<br>By |
|------------------|------|--------|------|--------|-----|-----|---|----|----------|------|-------------|-----------------|-----------------|----------|---------------------|---------------------|-------|-----|-----|--------|-------------|
| total 8 peptides |      |        |      |        |     |     |   |    |          |      |             |                 |                 |          |                     |                     |       |     |     |        |             |





[back to list](#)

### Protein Coverage:

### Supporting Peptides:

## OK193\_E\_251\_Ferritin

[back to list](#)

### Protein Coverage:

### Supporting Peptides:

## OK213\_E\_305\_Ferritin

[back to list](#)

### Protein Coverage:

### Supporting Peptides:

### CebrOK014\_E\_138\_Ferritin

[back to list](#)

### Protein Coverage:

### Supporting Peptides:

[illegible]

| Peptide                   | Uniq | -10lgP | Mass      | Length | ppm  | m/z      | z | RT    | Fraction | Scan      | Source File                                | Area ebraeus | Area judaeus | #Feature | #Feature ebraeus | #Feature judaeus | Start | End | PTM | AScore                     | Found By |
|---------------------------|------|--------|-----------|--------|------|----------|---|-------|----------|-----------|--------------------------------------------|--------------|--------------|----------|------------------|------------------|-------|-----|-----|----------------------------|----------|
| K.SVNQALLDLHEVAASHK.D     | Y    | 115.94 | 1830.9587 | 17     | 2.0  | 611.3255 | 3 | 37.13 | 2        | F2:96468  |                                            | 0            | 0            | 0        | 0                | 0                | 109   | 125 |     |                            |          |
|                           |      |        |           |        |      |          |   |       |          |           | 20210611-09_2021021-OK160A_816_5.3.236.mgf |              |              |          |                  |                  |       |     |     |                            | PEAKS DB |
| R.QNYHAESEAGVNR.Q         | N    | 96.97  | 1473.6597 | 13     | 1.1  | 737.8348 | 2 | 13.59 | 2        | F2:56908  | 20210611-09_2021021-OK160A_816_5.3.236.mgf | 0            | 0            | 0        | 0                | 0                | 10    | 22  |     |                            | PEAKS DB |
| R.Q(-17.03)NYHAESEAGVNR.Q | N    | 91.36  | 1456.6331 | 13     | -0.3 | 729.3205 | 2 | 18.75 | 2        | F2:64244  | 20210611-09_2021021-OK160A_816_5.3.236.mgf |              | 0            | 0        | 0                | 0                | 10    | 22  |     | Q1:Pyro-glu from Q:1000.00 | PEAKS DB |
| R.DDVALPGFAK.F            | N    | 90.93  | 1031.5287 | 10     | 2.5  | 516.7708 | 2 | 38.01 | 2        | F2:97999  | 20210611-09_2021021-OK160A_816_5.3.236.mgf | 0            | 0            | 0        | 0                | 0                | 44    | 53  |     |                            | PEAKS DB |
| R.VGTGLGEYMFDK.N          | Y    | 89.63  | 1315.6118 | 12     | 0.0  | 658.8104 | 2 | 40.56 | 2        | F2:102477 | 20210611-09_2021021-OK160A_816_5.3.236.mgf |              | 0            | 0        | 0                | 0                | 158   | 169 |     |                            | PEAKS DB |
| K.IGDHIITNLK.R            | N    | 89.25  | 1009.5556 | 9      | 5.8  | 505.7859 | 2 | 19.85 | 2        | F2:65725  | 20210611-09_2021021-OK160A_816_5.3.236.mgf |              | 0            | 0        | 0                | 0                | 148   | 156 |     |                            | PEAKS DB |
| total 8 peptides          |      |        |           |        |      |          |   |       |          |           |                                            |              |              |          |                  |                  |       |     |     |                            |          |

D\_041\_Thioredoxin

[back to list](#)

| [Protein Coverage](#) | [Supporting Peptides](#) |

Protein Coverage:

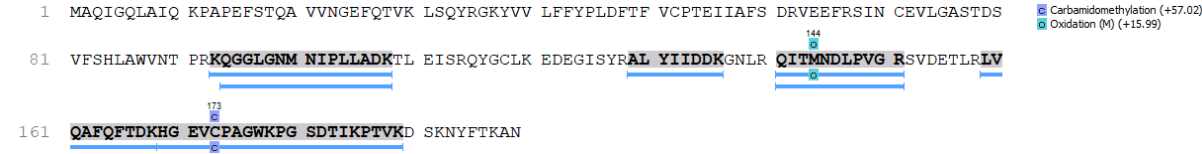

Supporting Peptides:

| Peptide                           | Uniq | -10lgP | Mass      | Length | ppm  | m/z      | z | RT    | Fraction | Scan      | Source File                                | Area ebraeus | Area judaeus | #Feature | #Feature ebraeus | #Feature judaeus | Start | End | PTM                  | AScore                           | Found By |
|-----------------------------------|------|--------|-----------|--------|------|----------|---|-------|----------|-----------|--------------------------------------------|--------------|--------------|----------|------------------|------------------|-------|-----|----------------------|----------------------------------|----------|
| K.HGEVC(+57.02)PAGWKPGSDTIKPTVK.D | Y    | 139.43 | 2263.1418 | 21     | 2.7  | 566.7919 | 4 | 26.70 | 2        | F2:77717  | 20210611-09_2021021-OK160A_816_5.3.236.mgf |              | 0            | 0        | 0                | 0                | 169   | 189 | Carbamidomethylation | C5:Carbamido methylation:1000.00 | Pt       |
| K.QGGLGNMNIPLLADK.T               | N    | 116.97 | 1539.8079 | 15     | -0.5 | 770.9076 | 2 | 49.54 | 2        | F2:118008 | 20210611-09_2021021-OK160A_816_5.3.236.mgf |              | 0            | 0        | 0                | 0                | 94    | 108 |                      |                                  | Pt       |
| R.Q(-17.03)ITMNDLPVGR.S           | N    | 105.67 | 1225.6125 | 11     | -0.1 | 613.8109 | 2 | 46.97 | 2        | F2:113637 | 20210611-09_2021021-OK160A_816_5.3.236.mgf |              | 0            | 0        | 0                | 0                | 141   | 151 |                      | Q1:Pyro-glu from Q:1000.00       | Pt       |
| R.QITMNDLPVGR.S                   | N    | 94.09  | 1242.6390 | 11     | 0.8  | 622.3250 | 2 | 36.64 | 1        | F1:34092  | 20210611-08_2021021-OK192A_815_5.3.236.mgf | 0            | 0            | 0        | 0                | 0                | 141   | 151 |                      |                                  | Pt       |
| R.QITM(+15.99)NDLPVGR.S           | N    | 91.16  | 1258.6339 | 11     | 1.7  | 630.3226 | 2 | 27.61 | 2        | F2:79161  | 20210611-09_2021021-OK160A_816_5.3.236.mgf |              | 0            | 0        | 0                | 0                | 141   | 151 | Oxidation (M)        | M4:Oxidation (M):1000.00         | Pt       |
| R.LVQAFQFTDK.H                    | N    | 90.87  | 1195.6237 | 10     | 0.1  | 598.8167 | 2 | 37.25 | 2        | F2:96539  | 20210611-09_2021021-OK160A_816_5.3.236.mgf | 0            | 0            | 0        | 0                | 0                | 159   | 168 |                      |                                  | Pt       |
| R.KQGGGLGNMNIPLLADK.T             | N    | 73.18  | 1667.9028 | 16     | -0.3 | 556.9726 | 3 | 43.41 | 1        | F1:41299  | 20210611-08_2021021-OK192A_815_5.3.236.mgf | 0            | 0            | 0        | 0                | 0                | 93    | 108 |                      |                                  | Pt       |
| R.ALYIIDDK.G                      | N    | 72.37  | 949.5120  | 8      | 1.0  | 475.7617 | 2 | 33.17 | 2        | F2:89147  | 20210611-09_2021021-OK160A_816_5.3.236.mgf | 0            | 0            | 0        | 0                | 0                | 129   | 136 |                      |                                  | Pt       |
| total 8 peptides                  |      |        |           |        |      |          |   |       |          |           |                                            |              |              |          |                  |                  |       |     |                      |                                  |          |

D\_085\_FK506-binding

[back to list](#)

| [Protein Coverage](#) | [Supporting Peptides](#) |

Protein Coverage:

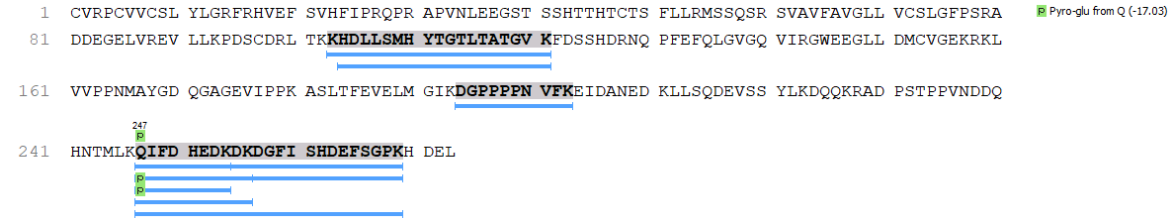

Supporting Peptides:

| Peptide                             | Uniq | -10lgP | Mass      | Length | ppm  | m/z      | z | RT    | Fraction | Scan     | Source File                                | Area ebraeus | Area judaeus | #Feature | #Feature ebraeus | #Feature judaeus | Start | End | PTM             | AScore                                           | Found By |
|-------------------------------------|------|--------|-----------|--------|------|----------|---|-------|----------|----------|--------------------------------------------|--------------|--------------|----------|------------------|------------------|-------|-----|-----------------|--------------------------------------------------|----------|
| K.DGFISHDEFSGPK.H                   | Y    | 116.11 | 1434.6415 | 13     | -0.6 | 718.3246 | 2 | 31.32 | 2        | F2:85481 | 20210611-09_2021021-OK160A_816_5.3.236.mgf | 0            | 0            | 0        | 0                | 0                | 257   | 269 |                 |                                                  | PEAKS DB |
| K.KHDLLSMHYTGTLTATGVK.F             | Y    | 106.37 | 2072.0725 | 19     | 3.9  | 691.6979 | 3 | 33.21 | 2        | F2:89037 | 20210611-09_2021021-OK160A_816_5.3.236.mgf |              | 0            | 0        | 0                | 0                | 103   | 121 |                 |                                                  | PEAKS DB |
| K.Q(-17.03)IFDHEDKDKDGFISHDEFSGPK.H | Y    | 102.63 | 2673.1982 | 23     | -1.3 | 669.3032 | 4 | 36.92 | 2        | F2:95954 | 20210611-09_2021021-OK160A_816_5.3.236.mgf |              | 0            | 0        | 0                | 0                | 247   | 269 |                 | Q1:Pyro-glu from Q:1000.00                       | PEAKS DB |
| K.QIFDHEDKDKDGFISHDEFSGPK.H         | Y    | 100.45 | 2690.2249 | 23     | 3.4  | 539.0518 | 5 | 30.99 | 2        | F2:84921 | 20210611-09_2021021-OK160A_816_5.3.236.mgf |              | 0            | 0        | 0                | 0                | 247   | 269 |                 |                                                  | PEAKS DB |
| K.DGPPPPNVFK.E                      | Y    | 99.23  | 1066.5447 | 10     | 2.1  | 534.2785 | 2 | 29.14 | 2        | F2:81685 | 20210611-09_2021021-OK160A_816_5.3.236.mgf | 0            | 0            | 0        | 0                | 0                | 194   | 203 |                 |                                                  | PEAKS DB |
| K.HDLLSMHYTGTLTATGVK.F              | Y    | 91.23  | 1943.9775 | 18     | 0.2  | 648.9972 | 3 | 37.37 | 2        | F2:96751 | 20210611-09_2021021-OK160A_816_5.3.236.mgf |              | 0            | 0        | 0                | 0                | 104   | 121 |                 |                                                  | PEAKS DB |
| K.KHDLLSM(+15.99)HYTGTLTATGVK.F     | Y    | 83.04  | 2088.0674 | 19     | -0.5 | 697.0265 | 3 | 28.81 | 2        | F2:81290 | 20210611-09_2021021-OK160A_816_5.3.236.mgf | 0            | 0            | 0        | 0                | 0                | 103   | 121 |                 | M7:Oxidation (M):1000.00                         | PEAKS DB |
| K.DKDGFISHDEFSGPK.H                 | Y    | 81.47  | 1677.7634 | 15     | 2.5  | 560.2608 | 3 | 27.88 | 2        | F2:79578 | 20210611-09_2021021-OK160A_816_5.3.236.mgf |              | 0            | 0        | 0                | 0                | 255   | 269 |                 |                                                  | PEAKS DB |
| K.Q(-17.03)IFDHEDKDK.D              | Y    | 74.23  | 1256.5673 | 10     | 1.0  | 419.8617 | 3 | 21.43 | 2        | F2:68510 | 20210611-09_2021021-OK160A_816_5.3.236.mgf |              | 0            | 0        | 0                | 0                | 247   | 256 |                 | Q1:Pyro-glu from Q:1000.00                       | PEAKS DB |
| K.Q(-17.03)IFDHEDK.D                | Y    | 73.52  | 1013.4454 | 8      | 5.5  | 507.7306 | 2 | 25.88 | 2        | F2:76140 | 20210611-09_2021021-OK160A_816_5.3.236.mgf | 0            | 0            | 0        | 0                | 0                | 247   | 254 | Pyro-glu from Q | Q1:Pyro-glu from Q:1000.00                       | PEAKS DB |
| K.QIFDHEDKDK.D                      | Y    | 67.29  | 1273.5939 | 10     | 1.9  | 637.8027 | 2 | 13.23 | 2        | F2:56456 | 20210611-09_2021021-OK160A_816_5.3.236.mgf |              | 0            | 0        | 0                | 0                | 247   | 256 |                 |                                                  | PEAKS DB |
| K.Q(-17.03)IFDHEDKDK(-.98).D        | Y    | 66.34  | 1255.5833 | 10     | 3.1  | 419.5345 | 3 | 20.44 | 2        | F2:66639 | 20210611-09_2021021-OK160A_816_5.3.236.mgf | 0            | 0            | 0        | 0                | 0                | 247   | 256 | Pyro-glu from Q | Q1:Pyro-glu from Q:1000.00;K10:Amidation:1000.00 | PEAKS DB |
| K.QIFDHEDK.D                        | Y    | 58.58  | 1030.4719 | 8      | 2.8  | 516.2425 | 2 | 16.00 | 2        | F2:60116 | 20210611-09_2021021-OK160A_816_5.3.236.mgf | 0            | 0            | 0        | 0                | 0                | 247   | 254 |                 |                                                  | PEAKS DB |
| total 13 peptides                   |      |        |           |        |      |          |   |       |          |          |                                            |              |              |          |                  |                  |       |     |                 |                                                  |          |

P\_002D\_003\_Thioredoxin-like

[back to list](#)

| [Protein Coverage](#) | [Supporting Peptides](#) |

Protein Coverage:

1 **INLIDLAFFK**RLDWPRVMY KGRDVEETHP CEVGTKGVCV IVLHSPSAGK EADKIISLQ FDIHGMVGLI VEHVDDGPGG 🔍 Oxidation (M) (+15.99)

81 SKVLDIVLLK QDGDVTTLNG SLELDQIEGE ITSHLLPASQ TKTGYHDEDY DFEPTNIDDM VVHMAYLER**E HLADVPLLP**A

161 **LTDK**TFPATT KDNKLAMVLF YLPFDAEGML FLKIFEDAGK KIAAMKGDDP KAHPLARVNC FDWTDVCRKE SVTTYPALYI

241 YRKGVKRDLY RLNLDVDIIV **RTVMLLQAEQ PIMLTSEK**EV NDFLSGQLPT EAYKDIDNLV LLKLSKSRKE TEMYIDVVKA

321 LEA**QMLFAVV** APDVTDLVPN GGVLHKRPK**D PIQPMETLTA** PRDAATIEEF LLKRQFALFP ELTFMNFPTL YARKQPF~~AIL~~

401 FYEPSVPSAN DMHQITIVSLL LSEKVHDMVF CKMTVGDKNI EAKTLLMNYT QTETVPAFTI VNHQ**KGVYV LQDKDMK**GSA

481 LLPW**IQAVQK** GEVAPTKILD KGEWKEPGQH YDFLALMDRE KEMDEEKKKA SEPATATPED TLEERQDVET RNALLELQ**RS**

561 RLYSGKDRKM HK**EADTVIA TVKPK**TSTDM GNGRKS**PKHS** EL

Supporting Peptides:

| Peptide                               | Uniq | -10lgP | Mass      | Length | ppm   | m/z      | z | RT    | Fraction | Scan      | Source File                                | Area ebraeus | Area judaeus | #Feature | #Feature ebraeus | #Feature judaeus | Start | End | PTM           | AScore                                           | Found By |
|---------------------------------------|------|--------|-----------|--------|-------|----------|---|-------|----------|-----------|--------------------------------------------|--------------|--------------|----------|------------------|------------------|-------|-----|---------------|--------------------------------------------------|----------|
| R.TVMLLQAEQPLMLTSEK.E                 | Y    | 131.44 | 1931.0107 | 17     | 3.3   | 966.5118 | 2 | 51.75 | 2        | F2:121721 | 20210611-09_2021021-OK160A_816_5.3.236.mgf |              | 0            | 0        | 0                | 0                | 262   | 278 |               |                                                  | PEAKS DB |
| K.EAADTVTATVKPK.T                     | Y    | 107.01 | 1329.7140 | 13     | -0.4  | 665.8612 | 2 | 18.99 | 2        | F2:64388  | 20210611-09_2021021-OK160A_816_5.3.236.mgf |              | 0            | 0        | 0                | 0                | 573   | 585 |               |                                                  | PEAKS DB |
| R.TVMLLQAEQPLM(+15.99)LTSEK.E         | Y    | 98.91  | 1947.0056 | 17     | 0.7   | 974.5067 | 2 | 48.41 | 2        | F2:115999 | 20210611-09_2021021-OK160A_816_5.3.236.mgf |              | 0            | 0        | 0                | 0                | 262   | 278 | Oxidation (M) | M12:Oxidation (M):123.34                         | PEAKS DB |
| K.DPIQPM(+15.99)ETLTAPR.D             | Y    | 97.50  | 1483.7340 | 13     | -1.4  | 742.8701 | 2 | 30.81 | 2        | F2:84833  | 20210611-09_2021021-OK160A_816_5.3.236.mgf |              | 0            | 0        | 0                | 0                | 350   | 362 |               | M6:Oxidation (M):100.00                          | PEAKS DB |
| R.E(-18.01)HLADVPLLPALTDK.T           | Y    | 95.20  | 1612.8824 | 15     | -1.0  | 807.4443 | 2 | 54.26 | 2        | F2:125340 | 20210611-09_2021021-OK160A_816_5.3.236.mgf |              | 0            | 0        | 0                | 0                | 150   | 164 |               | E1:Pyroglu from E:1000.00                        | PEAKS DB |
| K.E(-18.01)AADTVTATVKPK.T             | Y    | 94.26  | 1311.7034 | 13     | 0.0   | 438.2399 | 3 | 19.03 | 2        | F2:64574  | 20210611-09_2021021-OK160A_816_5.3.236.mgf |              | 0            | 0        | 0                | 0                | 573   | 585 |               | E1:Pyroglu from E:1000.00                        | PEAKS DB |
| R.TVM(+15.99)LLQAEQPLM(+15.99)LTSEK.E | Y    | 92.97  | 1963.0006 | 17     | 5.8   | 982.5092 | 2 | 44.91 | 2        | F2:110344 | 20210611-09_2021021-OK160A_816_5.3.236.mgf |              | 0            | 0        | 0                | 0                | 262   | 278 |               | M3:Oxidation (M):100.00;M12:Oxidation (M):100.00 | PEAKS DB |
| K.GQVVVLQDK.D                         | Y    | 75.89  | 1048.5553 | 9      | 4.1   | 525.2849 | 2 | 25.34 | 2        | F2:75184  | 20210611-09_2021021-OK160A_816_5.3.236.mgf | 0            | 0            | 0        | 0                | 0                | 466   | 474 |               |                                                  | PEAKS DB |
| K.GQVVVLQDKDM(+15.99)K.G              | Y    | 73.79  | 1438.7126 | 12     | -1.8  | 720.3593 | 2 | 21.10 | 2        | F2:67788  | 20210611-09_2021021-OK160A_816_5.3.236.mgf |              | 0            | 0        | 0                | 0                | 466   | 477 |               | M11:Oxidation (M):1000.00                        | PEAKS DB |
| INLIDLAFFKRL                          | Y    | 58.40  | 1495.8551 | 12     | -11.7 | 748.9229 | 2 | 45.08 | 2        | F2:110565 | 20210611-09_2021021-OK160A_816_5.3.236.mgf |              | 0            | 0        | 0                | 0                | 1     | 12  |               |                                                  | PEAKS DB |
| total 10 peptides                     |      |        |           |        |       |          |   |       |          |           |                                            |              |              |          |                  |                  |       |     |               |                                                  |          |

K\_0010\_152\_Protein

[back to list](#)

| [Protein Coverage](#) | [Supporting Peptides](#) |

Protein Coverage:

1 MLLAYFRPSA FTSPATMRRA AILFSCIVLA VQASDVLEFT DSNFKSKIKE LDVALVEFYA PWCGHCKRLA PEYEVAATKL

81 MKSDPPVPLV KVDCTAASET CKEYGVSQYP TLKIFKGGEF AKDYQGPRES KGIVNTMQKE AGPASKLELD FKQYEDFVGR

161 DTVCVVGFFA DADSEMAKTF SKLADTHEGD IRFGHTTASA IMDKANYKDE IVLFRPKAMQ NKFEDSAVKF TGDATKKPAI

241 KEFLTQEHLG MCGIRTMNNA GDFGKPTFVA FYNVDYVKNP KGSNYWRNRV MKVGKKLCDE GLK**VFFGVSN** KEEHDQELGE

321 CGLQNAEGDK PIVCAYDEKN RKFKMEBEFS VDSFEKFEVRG VLNGEVEAYL **KSEVPENND QPVKVVVARN FDDLVDPEK**

401 DVLIEFYAPW CGHCKSLAPK **YDELAEKLD ETDIVIAKMD ATANDPPSQY EVRGFPPTIYF APK**GSKSSPK KYEGGREVND

481 FIKYLAK**EAT DELQGFDR**KG KKKGGQKKKT EL

Supporting Peptides:

| Peptide                      | Uniq | -10lgP | Mass      | Length | ppm  | m/z      | z | RT    | Fraction | Scan      | Source File                                | Area ebraeus | Area judaeus | #Feature | #Feature ebraeus | #Feature judaeus | Start | End | PTM | AScore                   | Found By |
|------------------------------|------|--------|-----------|--------|------|----------|---|-------|----------|-----------|--------------------------------------------|--------------|--------------|----------|------------------|------------------|-------|-----|-----|--------------------------|----------|
| K.M(+15.99)DATANDPPSQYEVVR.G | N    | 116.71 | 1708.7362 | 15     | -0.3 | 855.3715 | 2 | 23.22 | 2        | F2:71559  | 20210611-09_2021021-OK160A_816_5.3.236.mgf |              | 0            | 0        | 0                | 0                | 439   | 453 |     | M1:Oxidation (M):1000.00 | PEAKS DB |
| K.SEPVPENNDQPVK.V            | N    | 112.89 | 1451.6892 | 13     | 2.8  | 726.8509 | 2 | 19.00 | 2        | F2:64401  | 20210611-09_2021021-OK160A_816_5.3.236.mgf | 0            | 0            | 0        | 0                | 0                | 372   | 384 |     |                          | PEAKS DB |
| K.MDATANDPPSQYEVVR.G         | N    | 106.16 | 1692.7413 | 15     | 0.4  | 847.3748 | 2 | 26.03 | 2        | F2:76318  | 20210611-09_2021021-OK160A_816_5.3.236.mgf |              | 0            | 0        | 0                | 0                | 439   | 453 |     |                          | PEAKS DB |
| K.EATDELQGFDR.K              | N    | 95.64  | 1279.5680 | 11     | 0.1  | 640.7886 | 2 | 29.87 | 2        | F2:83300  | 20210611-09_2021021-OK160A_816_5.3.236.mgf | 0            | 0            | 0        | 0                | 0                | 488   | 498 |     |                          | PEAKS DB |
| R.GFPTIYFAPK.G               | N    | 86.32  | 1139.6014 | 10     | -0.9 | 570.8051 | 2 | 46.08 | 2        | F2:112594 | 20210611-09_2021021-OK160A_816_5.3.236.mgf | 0            | 0            | 0        | 0                | 0                | 454   | 463 |     |                          | PEAKS DB |
| K.LKDETDIVIAK.M              | N    | 82.41  | 1243.7023 | 11     | 0.0  | 622.8558 | 2 | 25.53 | 2        | F2:75618  | 20210611-09_2021021-OK160A_816_5.3.236.mgf |              | 0            | 0        | 0                | 0                | 428   | 438 |     |                          | PEAKS DB |
| K.VFFGVSNK.E                 | N    | 77.53  | 896.4756  | 8      | 2.5  | 449.2443 | 2 | 30.55 | 2        | F2:84259  | 20210611-09_2021021-OK160A_816_5.3.236.mgf | 0            | 0            | 0        | 0                | 0                | 304   | 311 |     |                          | PEAKS DB |
| K.NFDDLVDNPEK.D              | Y    | 77.42  | 1304.5884 | 11     | 2.9  | 653.3006 | 2 | 33.46 | 2        | F2:89357  | 20210611-09_2021021-OK160A_816_5.3.236.mgf |              | 0            | 0        | 0                | 0                | 390   | 400 |     |                          | PEAKS DB |
| K.YDELAEK.L                  | N    | 64.80  | 866.4021  | 7      | 4.6  | 434.2085 | 2 | 16.53 | 2        | F2:60959  | 20210611-09_2021021-OK160A_816_5.3.236.mgf |              | 0            | 0        | 0                | 0                | 421   | 427 |     |                          | PEAKS DB |
| total 9 peptides             |      |        |           |        |      |          |   |       |          |           |                                            |              |              |          |                  |                  |       |     |     |                          |          |

CebrOK035\_J\_332\_Tpra06

[back to list](#)

| [Protein Coverage](#) | [Supporting Peptides](#) |

Protein Coverage:

1 **QFCPTMTDSR PGENK**CLHDN YLCGKEDDSG SCTSLCHCKS **GQMCFRDNH TITAVPR**IIN DRPVEITYYT CVALSSLNEC 🔍 Carbanidomethylation (+57.02)

81 SGIQ**EALKVL SPEAE**GESS **VEVLCR**CPSP KKYR**EVFIRP DINGDNPR**IV CANAP

Supporting Peptides:

| Peptide                       | Uniq | -10lgP | Mass      | Length | ppm | m/z      | z | RT    | Fraction | Scan     | Source File                                | Area ebraeus | Area judaeus | #Feature | #Feature ebraeus | #Feature judaeus | Start | End | PTM | AScore                           | Found By |
|-------------------------------|------|--------|-----------|--------|-----|----------|---|-------|----------|----------|--------------------------------------------|--------------|--------------|----------|------------------|------------------|-------|-----|-----|----------------------------------|----------|
| K.VLSPEAEEGESSVEVL(+57.02)R.C | Y    | 135.66 | 1988.9360 | 18     | 1.3 | 995.4724 | 2 | 37.98 | 2        | F2:97922 | 20210611-09_2021021-OK160A_816_5.3.236.mgf |              | 0            | 0        | 0                | 0                | 89    | 106 |     | C17:Carbanidomethylation:1000.00 | PEAK DB  |
| R.FVFIPIPDINGDNPR.Y           | Y    | 120.21 | 1658.8528 | 14     | 0.3 | 553.9561 | 3 | 38.51 | 2        | F2:99034 | 20210611-09_2021021-OK160A_816_5.3.236.mgf |              | 0            | 0        | 0                | 0                | 115   | 128 |     |                                  | PEAK DB  |
| R.DNDHTTITAVPR.I              | Y    | 112.12 | 1237.6051 | 11     | 0.6 | 619.8076 | 2 | 20.41 | 2        | F2:66510 | 20210611-09_2021021-OK160A_816_5.3.236.mgf |              | 0            | 0        | 0                | 0                | 47    | 57  |     |                                  | PEAK DB  |

total 5 peptides



[back to list](#)

### Protein Coverage:

### Supporting Peptides:

OK006\_E\_273\_Ferritin[back to list](#)

### Protein Coverage:

### Supporting Peptides:

## OK005\_J\_301\_Ferritin

[back to list](#)

### Protein Coverage:

### Supporting Peptides:

[illegible]



OK212\_J\_294\_Ferritin

[back to list](#)

[Protein Coverage](#) | [Supporting Peptides](#) |

Protein Coverage:

1 MAVSQCR<sup>14</sup>QNY HAECEAGINR QINMELHASY CYQSMFYFD RDDVALPGFA KFFRKSSEEE REHAEKLMTF QNQRGGR<sup>8</sup>IVL ☒ Carbamidomethylation (+57.02)

81 QDIKKPDRDE WSGGLDAMQV ALALEKSVNQ SLLDLHEVAT NHNDAQMTDF LEGNYLQE<sup>8</sup>QV RSIKELGDYI TNLKRVGPGL

161 GEYMFDKETL QE

Supporting Peptides:

| Peptide                   | Uniq | -10lgP | Mass      | Length | ppm  | m/z      | z | RT    | Fraction | Scan      | Source File                                | Area ebraeus | Area judaeus | #Feature | #Feature ebraeus | #Feature judaeus | Start | End | PTM                  | AScore                              | Found By |
|---------------------------|------|--------|-----------|--------|------|----------|---|-------|----------|-----------|--------------------------------------------|--------------|--------------|----------|------------------|------------------|-------|-----|----------------------|-------------------------------------|----------|
| R.DEWGSGLDAMQVALALEK.S    | Y    | 119.77 | 1931.9298 | 18     | 2.9  | 966.9709 | 2 | 59.33 | 2        | F2:131653 | 20210611-09_2021021-OK160A_816_5.3.236.mgf |              | 0            | 0        | 0                | 0                | 89    | 106 |                      |                                     | PEAKS DB |
| R.DDVALPGFAK.F            | N    | 90.93  | 1031.5287 | 10     | 2.5  | 516.7708 | 2 | 38.01 | 2        | F2:97999  | 20210611-09_2021021-OK160A_816_5.3.236.mgf | 0            | 0            | 0        | 0                | 0                | 42    | 51  |                      |                                     | PEAKS DB |
| R.VGPGLGEYMFDK.E          | Y    | 89.25  | 1311.6169 | 12     | 2.3  | 656.8145 | 2 | 42.16 | 2        | F2:105049 | 20210611-09_2021021-OK160A_816_5.3.236.mgf |              | 0            | 0        | 0                | 0                | 156   | 167 |                      |                                     | PEAKS DB |
| K.ELGDYITNLK.R            | Y    | 84.29  | 1164.6027 | 10     | 2.4  | 583.3076 | 2 | 39.25 | 2        | F2:100121 | 20210611-09_2021021-OK160A_816_5.3.236.mgf |              | 0            | 0        | 0                | 0                | 145   | 154 |                      |                                     | PEAKS DB |
| R.VGPGLGEYMFDKETLQE       | Y    | 80.78  | 1911.8923 | 17     | 3.6  | 956.9529 | 2 | 47.16 | 2        | F2:113799 | 20210611-09_2021021-OK160A_816_5.3.236.mgf |              | 0            | 0        | 0                | 0                | 156   | 172 |                      |                                     | PEAKS DB |
| R.QNYHAEC(+57.02)EAGINR.Q | Y    | 69.96  | 1560.6740 | 13     | 2.9  | 521.2313 | 3 | 16.74 | 2        | F2:61108  | 20210611-09_2021021-OK160A_816_5.3.236.mgf |              | 0            | 0        | 0                | 0                | 8     | 20  | Carbamidomethylation | C7:Carb amidom ethylatio n:1000. 00 | PEAKS DB |
| K.LMTFQNQR.G              | Y    | 63.53  | 1036.5125 | 8      | 1.5  | 519.2621 | 2 | 24.34 | 2        | F2:73402  | 20210611-09_2021021-OK160A_816_5.3.236.mgf |              | 0            | 0        | 0                | 0                | 67    | 74  |                      |                                     | PEAKS DB |
| R.IVLQDIK.K               | N    | 58.66  | 827.5116  | 7      | -0.5 | 414.7611 | 2 | 28.93 | 2        | F2:81450  | 20210611-09_2021021-OK160A_816_5.3.236.mgf |              | 0            | 0        | 0                | 0                | 78    | 84  |                      |                                     | PEAKS DB |
| total 8 peptides          |      |        |           |        |      |          |   |       |          |           |                                            |              |              |          |                  |                  |       |     |                      |                                     |          |

OK193\_E\_250\_Ferritin

[back to list](#)

[Protein Coverage](#) | [Supporting Peptides](#) |

Protein Coverage:

1 MAVSQCR<sup>14</sup>QNY HAECEAGINR QINMELHASY CYQSMFYFD RDDVALPGFA KFFRKSSEEE REHAEKLMTF QNQRGGR<sup>8</sup>IVL ☒ Carbamidomethylation (+57.02)

81 QDIKKPDRDE WSGGLDAMQV ALALEKSVNQ SLLDLHEVAT NHNDAQMTDF LEGNYLQE<sup>8</sup>QV RSIKELGDYI TNLKRVGPGL

161 GEYMFDKETL QE

Supporting Peptides:

| Peptide                   | Uniq | -10lgP | Mass      | Length | ppm  | m/z      | z | RT    | Fraction | Scan      | Source File                                | Area ebraeus | Area judaeus | #Feature | #Feature ebraeus | #Feature judaeus | Start | End | PTM                  | AScore                              | Found By |
|---------------------------|------|--------|-----------|--------|------|----------|---|-------|----------|-----------|--------------------------------------------|--------------|--------------|----------|------------------|------------------|-------|-----|----------------------|-------------------------------------|----------|
| R.DEWGSGLDAMQVALALEK.S    | Y    | 119.77 | 1931.9298 | 18     | 2.9  | 966.9709 | 2 | 59.33 | 2        | F2:131653 | 20210611-09_2021021-OK160A_816_5.3.236.mgf |              | 0            | 0        | 0                | 0                | 89    | 106 |                      |                                     | PEAKS DB |
| R.DDVALPGFAK.F            | N    | 90.93  | 1031.5287 | 10     | 2.5  | 516.7708 | 2 | 38.01 | 2        | F2:97999  | 20210611-09_2021021-OK160A_816_5.3.236.mgf | 0            | 0            | 0        | 0                | 0                | 42    | 51  |                      |                                     | PEAKS DB |
| R.VGPGLGEYMFDK.E          | Y    | 89.25  | 1311.6169 | 12     | 2.3  | 656.8145 | 2 | 42.16 | 2        | F2:105049 | 20210611-09_2021021-OK160A_816_5.3.236.mgf |              | 0            | 0        | 0                | 0                | 156   | 167 |                      |                                     | PEAKS DB |
| K.ELGDYITNLK.R            | Y    | 84.29  | 1164.6027 | 10     | 2.4  | 583.3076 | 2 | 39.25 | 2        | F2:100121 | 20210611-09_2021021-OK160A_816_5.3.236.mgf |              | 0            | 0        | 0                | 0                | 145   | 154 |                      |                                     | PEAKS DB |
| R.VGPGLGEYMFDKETLQE       | Y    | 80.78  | 1911.8923 | 17     | 3.6  | 956.9529 | 2 | 47.16 | 2        | F2:113799 | 20210611-09_2021021-OK160A_816_5.3.236.mgf |              | 0            | 0        | 0                | 0                | 156   | 172 |                      |                                     | PEAKS DB |
| R.QNYHAEC(+57.02)EAGINR.Q | Y    | 69.96  | 1560.6740 | 13     | 2.9  | 521.2313 | 3 | 16.74 | 2        | F2:61108  | 20210611-09_2021021-OK160A_816_5.3.236.mgf |              | 0            | 0        | 0                | 0                | 8     | 20  | Carbamidomethylation | C7:Carb amidom ethylatio n:1000. 00 | PEAKS DB |
| K.LMTFQNQR.G              | Y    | 63.53  | 1036.5125 | 8      | 1.5  | 519.2621 | 2 | 24.34 | 2        | F2:73402  | 20210611-09_2021021-OK160A_816_5.3.236.mgf |              | 0            | 0        | 0                | 0                | 67    | 74  |                      |                                     | PEAKS DB |
| R.IVLQDIK.K               | N    | 58.66  | 827.5116  | 7      | -0.5 | 414.7611 | 2 | 28.93 | 2        | F2:81450  | 20210611-09_2021021-OK160A_816_5.3.236.mgf |              | 0            | 0        | 0                | 0                | 78    | 84  |                      |                                     | PEAKS DB |
| total 8 peptides          |      |        |           |        |      |          |   |       |          |           |                                            |              |              |          |                  |                  |       |     |                      |                                     |          |

K\_0010\_064\_Ferritin

[back to list](#)

[Protein Coverage](#) | [Supporting Peptides](#) |

Protein Coverage:

1 MAVSQCR<sup>14</sup>QNY HAECEAGINR QINMELHASY CYQSMFYFD RDDVALPGFA KFFRKSSEEE REHAEKLMTF QNQRGGR<sup>8</sup>IVL ☒ Carbamidomethylation (+57.02)

81 QDIKKPDRDE WSGGLDAMQV ALALEKSVNQ SLLDLHDVAT NHNDAQMTDF LEGNYLQE<sup>8</sup>QV RSIKELGDYI TNLKRVGPGL

161 GEYMFDKETL QE

Supporting Peptides:

| Peptide                   | Uniq | -10lgP | Mass      | Length | ppm  | m/z      | z | RT    | Fraction | Scan      | Source File                                | Area ebraeus | Area judaeus | #Feature | #Feature ebraeus | #Feature judaeus | Start | End | PTM                  | AScore                              | Found By |
|---------------------------|------|--------|-----------|--------|------|----------|---|-------|----------|-----------|--------------------------------------------|--------------|--------------|----------|------------------|------------------|-------|-----|----------------------|-------------------------------------|----------|
| R.DEWGSGLDAMQVALALEK.S    | Y    | 119.77 | 1931.9298 | 18     | 2.9  | 966.9709 | 2 | 59.33 | 2        | F2:131653 | 20210611-09_2021021-OK160A_816_5.3.236.mgf |              | 0            | 0        | 0                | 0                | 89    | 106 |                      |                                     | PEAKS DB |
| R.DDVALPGFAK.F            | N    | 90.93  | 1031.5287 | 10     | 2.5  | 516.7708 | 2 | 38.01 | 2        | F2:97999  | 20210611-09_2021021-OK160A_816_5.3.236.mgf | 0            | 0            | 0        | 0                | 0                | 42    | 51  |                      |                                     | PEAKS DB |
| R.VGPGLGEYMFDK.E          | Y    | 89.25  | 1311.6169 | 12     | 2.3  | 656.8145 | 2 | 42.16 | 2        | F2:105049 | 20210611-09_2021021-OK160A_816_5.3.236.mgf |              | 0            | 0        | 0                | 0                | 156   | 167 |                      |                                     | PEAKS DB |
| K.ELGDYITNLK.R            | Y    | 84.29  | 1164.6027 | 10     | 2.4  | 583.3076 | 2 | 39.25 | 2        | F2:100121 | 20210611-09_2021021-OK160A_816_5.3.236.mgf |              | 0            | 0        | 0                | 0                | 145   | 154 |                      |                                     | PEAKS DB |
| R.VGPGLGEYMFDKETLQE       | Y    | 80.78  | 1911.8923 | 17     | 3.6  | 956.9529 | 2 | 47.16 | 2        | F2:113799 | 20210611-09_2021021-OK160A_816_5.3.236.mgf |              | 0            | 0        | 0                | 0                | 156   | 172 |                      |                                     | PEAKS DB |
| R.QNYHAEC(+57.02)EAGINR.Q | Y    | 69.96  | 1560.6740 | 13     | 2.9  | 521.2313 | 3 | 16.74 | 2        | F2:61108  | 20210611-09_2021021-OK160A_816_5.3.236.mgf |              | 0            | 0        | 0                | 0                | 8     | 20  | Carbamidomethylation | C7:Carb amidom ethylatio n:1000. 00 | PEAKS DB |
| K.LMTFQNQR.G              | Y    | 63.53  | 1036.5125 | 8      | 1.5  | 519.2621 | 2 | 24.34 | 2        | F2:73402  | 20210611-09_2021021-OK160A_816_5.3.236.mgf |              | 0            | 0        | 0                | 0                | 67    | 74  |                      |                                     | PEAKS DB |
| R.IVLQDIK.K               | N    | 58.66  | 827.5116  | 7      | -0.5 | 414.7611 | 2 | 28.93 | 2        | F2:81450  | 20210611-09_2021021-OK160A_816_5.3.236.mgf |              | 0            | 0        | 0                | 0                | 78    | 84  |                      |                                     | PEAKS DB |
| total 8 peptides          |      |        |           |        |      |          |   |       |          |           |                                            |              |              |          |                  |                  |       |     |                      |                                     |          |

CebrOK014\_E\_137\_Ferritin

[back to list](#)

[Protein Coverage](#) | [Supporting Peptides](#) |

Protein Coverage:

1 MAVSQCRQNY HAECEAGINR QINMELHASV CYQSMFYFD RDDVALPGFA KFFRKSSEEE REHAEKLMTF QNQRGGRIVL Carbamidomethylation (+57.02)

81 QDIKKPDRDE WSGSLDAMQV ALALEKSVNQ SLLDLHEVAT NHNDAQMTDF LEGNYLQEQV RSIKELGDYI TNLKRVGPGI

161 GEYMFDKETL QE

Supporting Peptides:

| Peptide                   | Uniq | -10lgP | Mass      | Length | ppm  | m/z      | z | RT    | Fraction | Scan      | Source File                                | Area ebraeus | Area judaeus | #Feature | #Feature ebraeus | #Feature judaeus | Start | End | PTM                  | AScore                              | Found By |
|---------------------------|------|--------|-----------|--------|------|----------|---|-------|----------|-----------|--------------------------------------------|--------------|--------------|----------|------------------|------------------|-------|-----|----------------------|-------------------------------------|----------|
| R.DEWGSGLDAMQVALALEK.S    | Y    | 119.77 | 1931.9298 | 18     | 2.9  | 966.9709 | 2 | 59.33 | 2        | F2:131653 | 20210611-09_2021021-OK160A_816_5.3.236.mgf |              | 0            | 0        | 0                | 0                | 89    | 106 |                      |                                     | PEAKS DB |
| R.DDVALPGFAK.F            | N    | 90.93  | 1031.5287 | 10     | 2.5  | 516.7708 | 2 | 38.01 | 2        | F2:97999  | 20210611-09_2021021-OK160A_816_5.3.236.mgf | 0            | 0            | 0        | 0                | 0                | 42    | 51  |                      |                                     | PEAKS DB |
| R.VGPGGLEGYMFDK.E         | Y    | 89.25  | 1311.6169 | 12     | 2.3  | 656.8145 | 2 | 42.16 | 2        | F2:105049 | 20210611-09_2021021-OK160A_816_5.3.236.mgf |              | 0            | 0        | 0                | 0                | 156   | 167 |                      |                                     | PEAKS DB |
| K.ELGDYITNLK.R            | Y    | 84.29  | 1164.6027 | 10     | 2.4  | 583.3076 | 2 | 39.25 | 2        | F2:100121 | 20210611-09_2021021-OK160A_816_5.3.236.mgf |              | 0            | 0        | 0                | 0                | 145   | 154 |                      |                                     | PEAKS DB |
| R.VGPGGLEGYMFDKETLQE      | Y    | 80.78  | 1911.8923 | 17     | 3.6  | 956.9529 | 2 | 47.16 | 2        | F2:113799 | 20210611-09_2021021-OK160A_816_5.3.236.mgf |              | 0            | 0        | 0                | 0                | 156   | 172 |                      |                                     | PEAKS DB |
| R.QNYHAEC(+57.02)EAGINR.Q | Y    | 69.96  | 1560.6740 | 13     | 2.9  | 521.2313 | 3 | 16.74 | 2        | F2:61108  | 20210611-09_2021021-OK160A_816_5.3.236.mgf |              | 0            | 0        | 0                | 0                | 8     | 20  | Carbamidomethylation | C7:Carb amidom ethylation n:1000.00 | PEAKS DB |
| K.LMTFQNQR.G              | Y    | 63.53  | 1036.5125 | 8      | 1.5  | 519.2621 | 2 | 24.34 | 2        | F2:73402  | 20210611-09_2021021-OK160A_816_5.3.236.mgf |              | 0            | 0        | 0                | 0                | 67    | 74  |                      |                                     | PEAKS DB |
| R.IVLQDIK.K               | N    | 58.66  | 827.5116  | 7      | -0.5 | 414.7611 | 2 | 28.93 | 2        | F2:81450  | 20210611-09_2021021-OK160A_816_5.3.236.mgf |              | 0            | 0        | 0                | 0                | 78    | 84  |                      |                                     | PEAKS DB |
| total 8 peptides          |      |        |           |        |      |          |   |       |          |           |                                            |              |              |          |                  |                  |       |     |                      |                                     |          |

SRX1323887\_E\_232\_Ferritin

[back to list](#)

| [Protein Coverage](#) | [Supporting Peptides](#) |

Protein Coverage:

1 MAVSQCRQNY HAECEAGINR QINMELHASV CYQSMFYFD RDDVALPGFA KFFRKSSEEE REHAEKLMTF QNQRGGRIVL Carbamidomethylation (+57.02)

81 QDIKKPDRDE WSGSLDAMQV ALALEKSVNQ SLLDLHEVAT NHNDAQMTDF LEGNYLQEQV RSIKELGDYI TNLKRVGPGI

161 GEYMFDKETL QE

Supporting Peptides:

| Peptide                   | Uniq | -10lgP | Mass      | Length | ppm  | m/z      | z | RT    | Fraction | Scan      | Source File                                | Area ebraeus | Area judaeus | #Feature | #Feature ebraeus | #Feature judaeus | Start | End | PTM                  | AScore                              | Found By |
|---------------------------|------|--------|-----------|--------|------|----------|---|-------|----------|-----------|--------------------------------------------|--------------|--------------|----------|------------------|------------------|-------|-----|----------------------|-------------------------------------|----------|
| R.DEWGSGLDAMQVALALEK.S    | Y    | 119.77 | 1931.9298 | 18     | 2.9  | 966.9709 | 2 | 59.33 | 2        | F2:131653 | 20210611-09_2021021-OK160A_816_5.3.236.mgf |              | 0            | 0        | 0                | 0                | 89    | 106 |                      |                                     | PEAKS DB |
| R.DDVALPGFAK.F            | N    | 90.93  | 1031.5287 | 10     | 2.5  | 516.7708 | 2 | 38.01 | 2        | F2:97999  | 20210611-09_2021021-OK160A_816_5.3.236.mgf | 0            | 0            | 0        | 0                | 0                | 42    | 51  |                      |                                     | PEAKS DB |
| R.VGPGGLEGYMFDK.E         | Y    | 89.25  | 1311.6169 | 12     | 2.3  | 656.8145 | 2 | 42.16 | 2        | F2:105049 | 20210611-09_2021021-OK160A_816_5.3.236.mgf |              | 0            | 0        | 0                | 0                | 156   | 167 |                      |                                     | PEAKS DB |
| K.ELGDYITNLK.R            | Y    | 84.29  | 1164.6027 | 10     | 2.4  | 583.3076 | 2 | 39.25 | 2        | F2:100121 | 20210611-09_2021021-OK160A_816_5.3.236.mgf |              | 0            | 0        | 0                | 0                | 145   | 154 |                      |                                     | PEAKS DB |
| R.VGPGGLEGYMFDKETLQE      | Y    | 80.78  | 1911.8923 | 17     | 3.6  | 956.9529 | 2 | 47.16 | 2        | F2:113799 | 20210611-09_2021021-OK160A_816_5.3.236.mgf |              | 0            | 0        | 0                | 0                | 156   | 172 |                      |                                     | PEAKS DB |
| R.QNYHAEC(+57.02)EAGINR.Q | Y    | 69.96  | 1560.6740 | 13     | 2.9  | 521.2313 | 3 | 16.74 | 2        | F2:61108  | 20210611-09_2021021-OK160A_816_5.3.236.mgf |              | 0            | 0        | 0                | 0                | 8     | 20  | Carbamidomethylation | C7:Carb amidom ethylation n:1000.00 | PEAKS DB |
| K.LMTFQNQR.G              | Y    | 63.53  | 1036.5125 | 8      | 1.5  | 519.2621 | 2 | 24.34 | 2        | F2:73402  | 20210611-09_2021021-OK160A_816_5.3.236.mgf |              | 0            | 0        | 0                | 0                | 67    | 74  |                      |                                     | PEAKS DB |
| R.IVLQDIK.K               | N    | 58.66  | 827.5116  | 7      | -0.5 | 414.7611 | 2 | 28.93 | 2        | F2:81450  | 20210611-09_2021021-OK160A_816_5.3.236.mgf |              | 0            | 0        | 0                | 0                | 78    | 84  |                      |                                     | PEAKS DB |
| total 8 peptides          |      |        |           |        |      |          |   |       |          |           |                                            |              |              |          |                  |                  |       |     |                      |                                     |          |

OK214\_J\_314\_Ferritin

[back to list](#)

| [Protein Coverage](#) | [Supporting Peptides](#) |

Protein Coverage:

1 MAVSQCRQNY HAECEAGINR QINMELHASV CYQSMFYFD RDDVALPGFA KFFRKSSEEE REHAEKLMTF QNQRGGRIVL Carbamidomethylation (+57.02)

81 QDIKKPDRDE WSGSLDAMQV ALALEKSVNQ SLLDLHEVAT NHNDAQMTDF LEGNYLQEQV RSIKELGDYI TNLKRVGPGI

161 GEYMFDKETL QE

Supporting Peptides:

| Peptide                   | Uniq | -10lgP | Mass      | Length | ppm  | m/z      | z | RT    | Fraction | Scan      | Source File                                | Area ebraeus | Area judaeus | #Feature | #Feature ebraeus | #Feature judaeus | Start | End | PTM                  | AScore                            | Found By |
|---------------------------|------|--------|-----------|--------|------|----------|---|-------|----------|-----------|--------------------------------------------|--------------|--------------|----------|------------------|------------------|-------|-----|----------------------|-----------------------------------|----------|
| R.DEWGSGLDAMQVALALEK.S    | Y    | 119.77 | 1931.9298 | 18     | 2.9  | 966.9709 | 2 | 59.33 | 2        | F2:131653 | 20210611-09_2021021-OK160A_816_5.3.236.mgf |              | 0            | 0        | 0                | 0                | 89    | 106 |                      |                                   | PEAKS DB |
| R.DDVALPGFAK.F            | N    | 90.93  | 1031.5287 | 10     | 2.5  | 516.7708 | 2 | 38.01 | 2        | F2:97999  | 20210611-09_2021021-OK160A_816_5.3.236.mgf | 0            | 0            | 0        | 0                | 0                | 42    | 51  |                      |                                   | PEAKS DB |
| R.VGPGGLEGYMFDK.E         | Y    | 89.25  | 1311.6169 | 12     | 2.3  | 656.8145 | 2 | 42.16 | 2        | F2:105049 | 20210611-09_2021021-OK160A_816_5.3.236.mgf |              | 0            | 0        | 0                | 0                | 156   | 167 |                      |                                   | PEAKS DB |
| K.ELGDYITNLK.R            | Y    | 84.29  | 1164.6027 | 10     | 2.4  | 583.3076 | 2 | 39.25 | 2        | F2:100121 | 20210611-09_2021021-OK160A_816_5.3.236.mgf |              | 0            | 0        | 0                | 0                | 145   | 154 |                      |                                   | PEAKS DB |
| R.VGPGGLEGYMFDKETLQE      | Y    | 80.78  | 1911.8923 | 17     | 3.6  | 956.9529 | 2 | 47.16 | 2        | F2:113799 | 20210611-09_2021021-OK160A_816_5.3.236.mgf |              | 0            | 0        | 0                | 0                | 156   | 172 |                      |                                   | PEAKS DB |
| R.QNYHAEC(+57.02)EAGINR.Q | Y    | 69.96  | 1560.6740 | 13     | 2.9  | 521.2313 | 3 | 16.74 | 2        | F2:61108  | 20210611-09_2021021-OK160A_816_5.3.236.mgf |              | 0            | 0        | 0                | 0                | 8     | 20  | Carbamidomethylation | C7:Carbamidomethylation n:1000.00 | PEAKS DB |
| K.LMTFQNQR.G              | Y    | 63.53  | 1036.5125 | 8      | 1.5  | 519.2621 | 2 | 24.34 | 2        | F2:73402  | 20210611-09_2021021-OK160A_816_5.3.236.mgf |              | 0            | 0        | 0                | 0                | 67    | 74  |                      |                                   | PEAKS DB |
| R.IVLQDIK.K               | N    | 58.66  | 827.5116  | 7      | -0.5 | 414.7611 | 2 | 28.93 | 2        | F2:81450  | 20210611-09_2021021-OK160A_816_5.3.236.mgf |              | 0            | 0        | 0                | 0                | 78    | 84  |                      |                                   | PEAKS DB |
| total 8 peptides          |      |        |           |        |      |          |   |       |          |           |                                            |              |              |          |                  |                  |       |     |                      |                                   |          |

CebrOK035\_J\_350\_Ferritin

[back to list](#)

| [Protein Coverage](#) | [Supporting Peptides](#) |

Protein Coverage:

1 MAVSQCRQNY HAECEAGINR QINMELHASV CYQSMAFYFD RDDVALPGFA KFFRKSSEEE REHAEKLMTF QNQRGGRIVL Carbamidomethylation (+57.02)

81 QDIKKPDRDE WSGGLDAMQV ALALEKSVNQ SLLDLHEVAT NHNDAQMTDF LEGNYLQEQV RSIKELGDYI TNLKRVGPGI

161 GEYMFDKETL QE

Supporting Peptides:

| Peptide                   | Uniq | -10lgP | Mass      | Length | ppm  | m/z      | z | RT    | Fraction | Scan      | Source File                                | Area ebraeus | Area judaeus | #Feature | #Feature ebraeus | #Feature judaeus | Start | End | PTM                  | AScore                            | Found By |
|---------------------------|------|--------|-----------|--------|------|----------|---|-------|----------|-----------|--------------------------------------------|--------------|--------------|----------|------------------|------------------|-------|-----|----------------------|-----------------------------------|----------|
| R.DEWGSGLDAMQVALALEK.S    | Y    | 119.77 | 1931.9298 | 18     | 2.9  | 966.9709 | 2 | 59.33 | 2        | F2:131653 | 20210611-09_2021021-OK160A_816_5.3.236.mgf |              | 0            | 0        | 0                | 0                | 89    | 106 |                      |                                   | PEAKS DB |
| R.DDVALPGFAK.F            | N    | 90.93  | 1031.5287 | 10     | 2.5  | 516.7708 | 2 | 38.01 | 2        | F2:97999  | 20210611-09_2021021-OK160A_816_5.3.236.mgf | 0            | 0            | 0        | 0                | 0                | 42    | 51  |                      |                                   | PEAKS DB |
| R.VGPGLEGYMFDK.E          | Y    | 89.25  | 1311.6169 | 12     | 2.3  | 656.8145 | 2 | 42.16 | 2        | F2:105049 | 20210611-09_2021021-OK160A_816_5.3.236.mgf |              | 0            | 0        | 0                | 0                | 156   | 167 |                      |                                   | PEAKS DB |
| K.ELGDYITNLK.R            | Y    | 84.29  | 1164.6027 | 10     | 2.4  | 583.3076 | 2 | 39.25 | 2        | F2:100121 | 20210611-09_2021021-OK160A_816_5.3.236.mgf |              | 0            | 0        | 0                | 0                | 145   | 154 |                      |                                   | PEAKS DB |
| R.VGPGLEGYMFDKETLQE       | Y    | 80.78  | 1911.8923 | 17     | 3.6  | 956.9529 | 2 | 47.16 | 2        | F2:113799 | 20210611-09_2021021-OK160A_816_5.3.236.mgf |              | 0            | 0        | 0                | 0                | 156   | 172 |                      |                                   | PEAKS DB |
| R.QNYHAEC(+57.02)EAGINR.Q | Y    | 69.96  | 1560.6740 | 13     | 2.9  | 521.2313 | 3 | 16.74 | 2        | F2:61108  | 20210611-09_2021021-OK160A_816_5.3.236.mgf |              | 0            | 0        | 0                | 0                | 8     | 20  | Carbamidomethylation | C7:Carbamidomethylation n:1000.00 | PEAKS DB |
| K.LMTFQNQR.G              | Y    | 63.53  | 1036.5125 | 8      | 1.5  | 519.2621 | 2 | 24.34 | 2        | F2:73402  | 20210611-09_2021021-OK160A_816_5.3.236.mgf |              | 0            | 0        | 0                | 0                | 67    | 74  |                      |                                   | PEAKS DB |
| R.IVLQDIK.K               | N    | 58.66  | 827.5116  | 7      | -0.5 | 414.7611 | 2 | 28.93 | 2        | F2:81450  | 20210611-09_2021021-OK160A_816_5.3.236.mgf |              | 0            | 0        | 0                | 0                | 78    | 84  |                      |                                   | PEAKS DB |
| total 8 peptides          |      |        |           |        |      |          |   |       |          |           |                                            |              |              |          |                  |                  |       |     |                      |                                   |          |

CebrOK033\_J\_243\_Ferritin

[back to list](#)

| [Protein Coverage](#) | [Supporting Peptides](#) |

Protein Coverage:

1 MAVSQCRQNY HAECEAGINR QINMELHASV CYQSMAFYFD RDDVALPGFA KFFRKSSEEE REHAEKLMTF QNQRGGRIVL Carbamidomethylation (+57.02)

81 QDIKKPDRDE WSGGLDAMQV ALALEKSVNQ SLLDLHEVAT NHNDAQMTDF LEGNYLQEQV RSIKELGDYI TNLKRVGPGI

161 GEYMFDKETL QE

Supporting Peptides:

| Peptide                   | Uniq | -10lgP | Mass      | Length | ppm  | m/z      | z | RT    | Fraction | Scan      | Source File                                | Area ebraeus | Area judaeus | #Feature | #Feature ebraeus | #Feature judaeus | Start | End | PTM                  | AScore                            | Found By |
|---------------------------|------|--------|-----------|--------|------|----------|---|-------|----------|-----------|--------------------------------------------|--------------|--------------|----------|------------------|------------------|-------|-----|----------------------|-----------------------------------|----------|
| R.DEWGSGLDAMQVALALEK.S    | Y    | 119.77 | 1931.9298 | 18     | 2.9  | 966.9709 | 2 | 59.33 | 2        | F2:131653 | 20210611-09_2021021-OK160A_816_5.3.236.mgf |              | 0            | 0        | 0                | 0                | 89    | 106 |                      |                                   | PEAKS DB |
| R.DDVALPGFAK.F            | N    | 90.93  | 1031.5287 | 10     | 2.5  | 516.7708 | 2 | 38.01 | 2        | F2:97999  | 20210611-09_2021021-OK160A_816_5.3.236.mgf | 0            | 0            | 0        | 0                | 0                | 42    | 51  |                      |                                   | PEAKS DB |
| R.VGPGLEGYMFDK.E          | Y    | 89.25  | 1311.6169 | 12     | 2.3  | 656.8145 | 2 | 42.16 | 2        | F2:105049 | 20210611-09_2021021-OK160A_816_5.3.236.mgf |              | 0            | 0        | 0                | 0                | 156   | 167 |                      |                                   | PEAKS DB |
| K.ELGDYITNLK.R            | Y    | 84.29  | 1164.6027 | 10     | 2.4  | 583.3076 | 2 | 39.25 | 2        | F2:100121 | 20210611-09_2021021-OK160A_816_5.3.236.mgf |              | 0            | 0        | 0                | 0                | 145   | 154 |                      |                                   | PEAKS DB |
| R.VGPGLEGYMFDKETLQE       | Y    | 80.78  | 1911.8923 | 17     | 3.6  | 956.9529 | 2 | 47.16 | 2        | F2:113799 | 20210611-09_2021021-OK160A_816_5.3.236.mgf |              | 0            | 0        | 0                | 0                | 156   | 172 |                      |                                   | PEAKS DB |
| R.QNYHAEC(+57.02)EAGINR.Q | Y    | 69.96  | 1560.6740 | 13     | 2.9  | 521.2313 | 3 | 16.74 | 2        | F2:61108  | 20210611-09_2021021-OK160A_816_5.3.236.mgf |              | 0            | 0        | 0                | 0                | 8     | 20  | Carbamidomethylation | C7:Carbamidomethylation n:1000.00 | PEAKS DB |
| K.LMTFQNQR.G              | Y    | 63.53  | 1036.5125 | 8      | 1.5  | 519.2621 | 2 | 24.34 | 2        | F2:73402  | 20210611-09_2021021-OK160A_816_5.3.236.mgf |              | 0            | 0        | 0                | 0                | 67    | 74  |                      |                                   | PEAKS DB |
| R.IVLQDIK.K               | N    | 58.66  | 827.5116  | 7      | -0.5 | 414.7611 | 2 | 28.93 | 2        | F2:81450  | 20210611-09_2021021-OK160A_816_5.3.236.mgf |              | 0            | 0        | 0                | 0                | 78    | 84  |                      |                                   | PEAKS DB |
| total 8 peptides          |      |        |           |        |      |          |   |       |          |           |                                            |              |              |          |                  |                  |       |     |                      |                                   |          |

OK212\_J\_295\_Ferritin

[back to list](#)

| [Protein Coverage](#) | [Supporting Peptides](#) |

Protein Coverage:

1 MAVSQCRQNY HAECEAGINR QINMEFHASV CYQSMAFYFD RDDVALPGFA KFFRKSSEEE REHAEKLMTF QNQRGGRIVL Carbamidomethylation (+57.02)

81 QDIKKPDRDE WSGGLDAMQV ALALEKSVNQ SLLDLHEVAT NHNDAQMTDF LEGNYLQEQV RSIKELGDYI TNLKRVGPGI

161 GEYMFDKETL QE

Supporting Peptides:

| Peptide                   | Uniq | -10lgP | Mass      | Length | ppm  | m/z      | z | RT    | Fraction | Scan      | Source File                                | Area ebraeus | Area judaeus | #Feature | #Feature ebraeus | #Feature judaeus | Start | End | PTM                  | AScore                            | Found By |
|---------------------------|------|--------|-----------|--------|------|----------|---|-------|----------|-----------|--------------------------------------------|--------------|--------------|----------|------------------|------------------|-------|-----|----------------------|-----------------------------------|----------|
| R.DEWGSGLDAMQVALALEK.S    | Y    | 119.77 | 1931.9298 | 18     | 2.9  | 966.9709 | 2 | 59.33 | 2        | F2:131653 | 20210611-09_2021021-OK160A_816_5.3.236.mgf |              | 0            | 0        | 0                | 0                | 89    | 106 |                      |                                   | PEAKS DB |
| R.DDVALPGFAK.F            | N    | 90.93  | 1031.5287 | 10     | 2.5  | 516.7708 | 2 | 38.01 | 2        | F2:97999  | 20210611-09_2021021-OK160A_816_5.3.236.mgf | 0            | 0            | 0        | 0                | 0                | 42    | 51  |                      |                                   | PEAKS DB |
| R.VGPGLEGYMFDK.E          | Y    | 89.25  | 1311.6169 | 12     | 2.3  | 656.8145 | 2 | 42.16 | 2        | F2:105049 | 20210611-09_2021021-OK160A_816_5.3.236.mgf |              | 0            | 0        | 0                | 0                | 156   | 167 |                      |                                   | PEAKS DB |
| K.ELGDYITNLK.R            | Y    | 84.29  | 1164.6027 | 10     | 2.4  | 583.3076 | 2 | 39.25 | 2        | F2:100121 | 20210611-09_2021021-OK160A_816_5.3.236.mgf |              | 0            | 0        | 0                | 0                | 145   | 154 |                      |                                   | PEAKS DB |
| R.VGPGLEGYMFDKETLQE       | Y    | 80.78  | 1911.8923 | 17     | 3.6  | 956.9529 | 2 | 47.16 | 2        | F2:113799 | 20210611-09_2021021-OK160A_816_5.3.236.mgf |              | 0            | 0        | 0                | 0                | 156   | 172 |                      |                                   | PEAKS DB |
| R.QNYHAEC(+57.02)EAGINR.Q | Y    | 69.96  | 1560.6740 | 13     | 2.9  | 521.2313 | 3 | 16.74 | 2        | F2:61108  | 20210611-09_2021021-OK160A_816_5.3.236.mgf |              | 0            | 0        | 0                | 0                | 8     | 20  | Carbamidomethylation | C7:Carbamidomethylation n:1000.00 | PEAKS DB |
| K.LMTFQNQR.G              | Y    | 63.53  | 1036.5125 | 8      | 1.5  | 519.2621 | 2 | 24.34 | 2        | F2:73402  | 20210611-09_2021021-OK160A_816_5.3.236.mgf |              | 0            | 0        | 0                | 0                | 67    | 74  |                      |                                   | PEAKS DB |
| R.IVLQDIK.K               | N    | 58.66  | 827.5116  | 7      | -0.5 | 414.7611 | 2 | 28.93 | 2        | F2:81450  | 20210611-09_2021021-OK160A_816_5.3.236.mgf |              | 0            | 0        | 0                | 0                | 78    | 84  |                      |                                   | PEAKS DB |
| total 8 peptides          |      |        |           |        |      |          |   |       |          |           |                                            |              |              |          |                  |                  |       |     |                      |                                   |          |

V\_1278\_120\_Ferritin

[back to list](#)

| [Protein Coverage](#) | [Supporting Peptides](#) |

Protein Coverage:

14

8

1

MAVSQCRQNYHAECEAGINRQINMELHASYYQSMAFFFD

RDDVALPGFAKFFRKSSEEREHAEK

LMTFQNQRGGRIVL

81

QDIKKPDRDEWGSGLDAMQV

ALALEKSVNQ

SLLDLHEVATNHNDQM

TDFLEGNYLQEQVRSIK

ELGDYITNLKRVGPGL

161

GEYMFDKETLQE

Carbamidomethylation (+57.02)

Supporting Peptides:

| Peptide                   | Uniq | -10lgP | Mass      | Length | ppm  | m/z      | z | RT    | Fraction | Scan      | Source File                                | Area ebraeus | Area judaeus | #Feature | #Feature ebraeus | #Feature judaeus | Start | End | PTM                  | AScore                            | Found By |
|---------------------------|------|--------|-----------|--------|------|----------|---|-------|----------|-----------|--------------------------------------------|--------------|--------------|----------|------------------|------------------|-------|-----|----------------------|-----------------------------------|----------|
| R.DEWGSGLDAMQVALALEK.S    | Y    | 119.77 | 1931.9298 | 18     | 2.9  | 966.9709 | 2 | 59.33 | 2        | F2:131653 | 20210611-09_2021021-OK160A_816_5.3.236.mgf |              | 0            | 0        | 0                | 0                | 89    | 106 |                      |                                   | PEAKS DB |
| R.DDVALPGFAK.F            | N    | 90.93  | 1031.5287 | 10     | 2.5  | 516.7708 | 2 | 38.01 | 2        | F2:97999  | 20210611-09_2021021-OK160A_816_5.3.236.mgf | 0            | 0            | 0        | 0                | 0                | 42    | 51  |                      |                                   | PEAKS DB |
| R.VGPGLGEYMFDK.E          | Y    | 89.25  | 1311.6169 | 12     | 2.3  | 656.8145 | 2 | 42.16 | 2        | F2:105049 | 20210611-09_2021021-OK160A_816_5.3.236.mgf |              | 0            | 0        | 0                | 0                | 156   | 167 |                      |                                   | PEAKS DB |
| K.ELGDYITNLK.R            | Y    | 84.29  | 1164.6027 | 10     | 2.4  | 583.3076 | 2 | 39.25 | 2        | F2:100121 | 20210611-09_2021021-OK160A_816_5.3.236.mgf |              | 0            | 0        | 0                | 0                | 145   | 154 |                      |                                   | PEAKS DB |
| R.VGPGLGEYMFDKETLQE       | Y    | 80.78  | 1911.8923 | 17     | 3.6  | 956.9529 | 2 | 47.16 | 2        | F2:113799 | 20210611-09_2021021-OK160A_816_5.3.236.mgf |              | 0            | 0        | 0                | 0                | 156   | 172 |                      |                                   | PEAKS DB |
| R.QNYHAEC(+57.02)EAGINR.Q | Y    | 69.96  | 1560.6740 | 13     | 2.9  | 521.2313 | 3 | 16.74 | 2        | F2:61108  | 20210611-09_2021021-OK160A_816_5.3.236.mgf |              | 0            | 0        | 0                | 0                | 8     | 20  | Carbamidomethylation | C7:Carbamidomethylation n:1000.00 | PEAKS DB |
| K.LMTFQNQR.G              | Y    | 63.53  | 1036.5125 | 8      | 1.5  | 519.2621 | 2 | 24.34 | 2        | F2:73402  | 20210611-09_2021021-OK160A_816_5.3.236.mgf |              | 0            | 0        | 0                | 0                | 67    | 74  |                      |                                   | PEAKS DB |
| R.IVLQDIK.K               | N    | 58.66  | 827.5116  | 7      | -0.5 | 414.7611 | 2 | 28.93 | 2        | F2:81450  | 20210611-09_2021021-OK160A_816_5.3.236.mgf |              | 0            | 0        | 0                | 0                | 78    | 84  |                      |                                   | PEAKS DB |
| total 8 peptides          |      |        |           |        |      |          |   |       |          |           |                                            |              |              |          |                  |                  |       |     |                      |                                   |          |

V\_1302\_266\_Ferritin

back to list

Protein Coverage | Supporting Peptides |

Protein Coverage:

14

8

1

MAVSQCRQNYHAECEAGINRQINMELHASYYQSMAFFFD

RDDVALPGFAKFFRKSSEEREHAEK

LMTFQNQRGGRIVL

81

QDIKKPDRDEWGSGLDAMQV

ALALEKSVNQ

SLLDLHEVATNHNDQM

TDFLEGNYLQEQVRSIK

ELGDYITNLKRVGPGL

161

GEYMFDKETLQE

Carbamidomethylation (+57.02)

Supporting Peptides:

V\_1258\_223\_Ferritin

back to list

Protein Coverage | Supporting Peptides |

Protein Coverage:

14

8

1

MAVSQCRQNYHAECEAGINRQINMELHASYYQSMAFFFD

RDDVALPGFAKFFRKSSEEREHAEK

LMTFQNQRGGRIVL

81

QDIKKPDRDEWGSGLDAMQV

ALALEKSVNQ

SLLDLHEVATNHNDQM

TDFLEGNYLQEQVRSIK

ELGDYITNLKRVGPGL

161

GEYMFDKETLQE

Carbamidomethylation (+57.02)

Supporting Peptides:

V\_CG13\_283\_Ferritin

back to list

Protein Coverage | Supporting Peptides |

Protein Coverage:

1 MAVSQCRQNY HAECAGINR QINMELHASY CYQSMAFFFD RDDVALPGFA KFFRKSEEE REHAELMTF QNQRGGRIVL  
81 QDIKPPDE WSGGLDMQV ALALEKSVNQ SLDDLHEVAT NHNDAQMTDF LEGNYLQEQV RSIKELGDIYI TNLKRVGPGI  
161 GEYMFDKETL QE

### Supporting Peptides:

| Peptide                   | Uniq | -10lgP | Mass      | Length | ppm  | m/z      | z | RT    | Fraction | Scan      | Source File                                | Area<br>ebraeus | Area<br>judaesus | #Feature | #Feature<br>ebraeus | #Feature<br>judaesus | Start | End | PTM                  | AScore                                          | Found<br>By |
|---------------------------|------|--------|-----------|--------|------|----------|---|-------|----------|-----------|--------------------------------------------|-----------------|------------------|----------|---------------------|----------------------|-------|-----|----------------------|-------------------------------------------------|-------------|
| R.DEWGSGLDMQVALALEK.S     | Y    | 119.77 | 1931.9298 | 18     | 2.9  | 966.9709 | 2 | 59.33 | 2        | F2:131653 | 20210611-09_2021021-OK160A_816_5.3.236.mgf |                 | 0                | 0        | 0                   | 0                    | 89    | 106 |                      |                                                 | PEAKS<br>DB |
| R.DDVALPGFAK.F            | N    | 90.93  | 1031.5287 | 10     | 2.5  | 516.7708 | 2 | 38.01 | 2        | F2:97999  | 20210611-09_2021021-OK160A_816_5.3.236.mgf | 0               | 0                | 0        | 0                   | 0                    | 42    | 51  |                      |                                                 | PEAKS<br>DB |
| R.VGPGGLGEYMFDK.E         | Y    | 89.25  | 1311.6169 | 12     | 2.3  | 656.8145 | 2 | 42.16 | 2        | F2:105049 | 20210611-09_2021021-OK160A_816_5.3.236.mgf |                 | 0                | 0        | 0                   | 0                    | 156   | 167 |                      |                                                 | PEAKS<br>DB |
| K.ELGDYITNLK.R            | Y    | 84.29  | 1164.6027 | 10     | 2.4  | 583.3076 | 2 | 39.25 | 2        | F2:100121 | 20210611-09_2021021-OK160A_816_5.3.236.mgf |                 | 0                | 0        | 0                   | 0                    | 145   | 154 |                      |                                                 | PEAKS<br>DB |
| R.VGPGGLGEYMFDKETLQE      | Y    | 80.78  | 1911.8923 | 17     | 3.6  | 956.9529 | 2 | 47.16 | 2        | F2:113799 | 20210611-09_2021021-OK160A_816_5.3.236.mgf |                 | 0                | 0        | 0                   | 0                    | 156   | 172 |                      |                                                 | PEAKS<br>DB |
| R.QNYHAEC(+57.02)EAGINR.Q | Y    | 69.96  | 1560.6740 | 13     | 2.9  | 521.2313 | 3 | 16.74 | 2        | F2:61108  | 20210611-09_2021021-OK160A_816_5.3.236.mgf |                 | 0                | 0        | 0                   | 0                    | 8     | 20  | Carbamidomethylation | C7:Carb<br>amidom<br>ethylatio<br>n:1000,<br>00 | PEAKS<br>DB |
| K.LMTFGNQNR.G             | Y    | 63.53  | 1036.5125 | 8      | 1.5  | 519.2621 | 2 | 24.34 | 2        | F2:73402  | 20210611-09_2021021-OK160A_816_5.3.236.mgf |                 | 0                | 0        | 0                   | 0                    | 67    | 74  |                      |                                                 | PEAKS<br>DB |
| R.IVLQDIK.K               | N    | 58.66  | 827.5116  | 7      | -0.5 | 414.7611 | 2 | 28.93 | 2        | F2:81450  | 20210611-09_2021021-OK160A_816_5.3.236.mgf |                 | 0                | 0        | 0                   | 0                    | 78    | 84  |                      |                                                 | PEAKS<br>DB |

**OK212\_J\_014\_B2**

[back to list](#)

[| Protein Coverage](#) | [Supporting Peptides](#) |

**Protein Coverage:**

1 YPQRRDGAPA NAAPNLQPFN GEMAMPNMQP MHALPMSMSG MSSPQLMPLN PNLGMGFKRE NLEKRRQHSQ FSDDNKSPFD  
67 79  
Amidation (-0.98)  
Pyro-glu from Q (-17.03)  
81 SEDGLGNFMN FMKENGNNLP FANMDSAATD LGHFEPsAEN EDGKFRFFDK EQ

### Supporting Peptides:

| Peptide                                     | Uniq | -10logP | Mass      | Length | ppm  | m/z       | z | RT    | Fraction | Scan      | Source File                                | Area ebraeus | Area judaeus | #Feature | #Feature ebraeus | #Feature judaeus | Start | End | PTM             | AScore                                               |
|---------------------------------------------|------|---------|-----------|--------|------|-----------|---|-------|----------|-----------|--------------------------------------------|--------------|--------------|----------|------------------|------------------|-------|-----|-----------------|------------------------------------------------------|
| K.ENGNLFPANMDSAATDLGHFEPSEAENEDGK.F         | Y    | 125.47  | 3290.4058 | 31     | 10.2 | 1097.8158 | 3 | 50.09 | 2        | F2:119029 | 20210611-09_2021021-OK160A_816_5.3.236.mgf |              | 0            | 0        | 0                | 0                | 94    | 124 |                 |                                                      |
| R.Q(-17.03)HSQFSDDNK.S                      | N    | 112.62  | 1187.4843 | 10     | 2.1  | 594.7482  | 2 | 13.73 | 2        | F2:57082  | 20210611-09_2021021-OK160A_816_5.3.236.mgf | 0            | 0            | 0        | 0                | 0                | 67    | 76  | Pyro-glu from Q | Q1:Pyro-glu from Q:1000.00                           |
| K.ENGNLFPANM(+15.99)DSAATDLGHFEPSEAENEDGK.F | Y    | 108.80  | 3306.4006 | 31     | 11.4 | 1103.1488 | 3 | 43.68 | 2        | F2:107793 | 20210611-09_2021021-OK160A_816_5.3.236.mgf |              | 0            | 0        | 0                | 0                | 94    | 124 |                 | M11:Oxidation (M):1000.00                            |
| K.SPFDSEDLGNFM(+15.99)NFM(+15.99)K.E        | N    | 104.89  | 1966.8076 | 17     | 2.8  | 984.4097  | 2 | 45.96 | 2        | F2:112336 | 20210611-09_2021021-OK160A_816_5.3.236.mgf | 0            | 0            | 0        | 0                | 0                | 77    | 93  |                 | M13:Oxidation (M):1000.00; M16:Oxidation (M):1000.00 |
| R.RQHSQFSDDNK.S                             | N    | 100.18  | 1360.6119 | 11     | 0.4  | 454.5429  | 3 | 6.44  | 2        | F2:52336  | 20210611-09_2021021-OK160A_816_5.3.236.mgf |              | 0            | 0        | 0                | 0                | 66    | 76  |                 |                                                      |
| R.Q(-17.03)HSQFSDDNK(-.98).S                | N    | 90.51   | 1186.5002 | 10     | 2.1  | 594.2562  | 2 | 12.84 | 2        | F2:55863  | 20210611-09_2021021-OK160A_816_5.3.236.mgf |              | 0            | 0        | 0                | 0                | 67    | 76  | Amidation       | Q1:Pyro-glu from Q:1000.00; K10:Amidation n:1000.00  |
| R.QHSQFSDDNK.S                              | N    | 87.11   | 1204.5109 | 10     | -2.8 | 603.2585  | 2 | 8.72  | 2        | F2:52560  | 20210611-09_2021021-OK160A_816_5.3.236.mgf |              | 0            | 0        | 0                | 0                | 67    | 76  |                 |                                                      |
| K.SPFDSEDLGNFMNFMK.E                        | N    | 83.66   | 1934.8179 | 17     | 0.7  | 968.4128  | 2 | 59.14 | 2        | F2:131486 | 20210611-09_2021021-OK160A_816_5.3.236.mgf |              | 0            | 0        | 0                | 0                | 77    | 93  |                 |                                                      |
| K.E(-18.01)NGNLPANMDSAATDLGHFEPSEAENEDGK.F  | Y    | 83.49   | 3272.3953 | 31     | 0.6  | 1091.8018 | 3 | 55.58 | 2        | F2:127016 | 20210611-09_2021021-OK160A_816_5.3.236.mgf |              | 0            | 0        | 0                | 0                | 94    | 124 |                 | E1:Pyro-glu from E:1000.00                           |
| K.SPFDSEDLGNFM(+15.99)NFMK.E                | N    | 76.38   | 1950.8127 | 17     | 2.4  | 976.4119  | 2 | 53.56 | 2        | F2:124496 | 20210611-09_2021021-OK160A_816_5.3.236.mgf |              | 0            | 0        | 0                | 0                | 77    | 93  |                 | M13:Oxidation (M):0.0                                |
| K.RRQHSQFSDDNK.S                            | N    | 72.54   | 1516.7130 | 12     | 10.8 | 506.5816  | 3 | 19.31 | 2        | F2:64986  | 20210611-09_2021021-OK160A_816_5.3.236.mgf |              | 0            | 0        | 0                | 0                | 65    | 76  |                 |                                                      |

**OK214\_J\_010\_B2**

[back to list](#)

[| Protein Coverage](#) | [Supporting Peptides](#) |

### Protein Coverage:

1 YPQRRDGAPA NAAPNLQPFN GEMAMPNMQP MHALPMSMSG MSSPQLMPLN PNLGMGFKRE NLEKRRQHSQ FSDDNKSPFD  
67 75  
Amidation (-0.98)  
Pyro-glu from Q (-17.03)  
81 SEDGLGNFMN FMKENGNNLP FANMDSAATD LGHFPSAEN EDGKFRFFDK EQ

### Supporting Peptides:

| Peptide                                   | Uniq | -10lgP | Mass      | Length | ppm  | m/z       | z | RT    | Fraction | Scan      | Source File                                | Area ebraeus | Area judaeus | #Feature | #Feature ebraeus | #Feature judaeus | Start | End | PTM             | AScore                                                 |
|-------------------------------------------|------|--------|-----------|--------|------|-----------|---|-------|----------|-----------|--------------------------------------------|--------------|--------------|----------|------------------|------------------|-------|-----|-----------------|--------------------------------------------------------|
| K.ENGNLNPANMDSAATDLGHFESAENEDGK.F         | Y    | 125.47 | 3290.4058 | 31     | 10.2 | 1097.8158 | 3 | 50.09 | 2        | F2:119029 | 20210611-09_2021021-OK160A_816_5.3.236.mgf |              | 0            | 0        | 0                | 0                | 94    | 124 |                 |                                                        |
| R.Q(-17.03)HSQFSDDNK.S                    | N    | 112.62 | 1187.4843 | 10     | 2.1  | 594.7482  | 2 | 13.73 | 2        | F2:57082  | 20210611-09_2021021-OK160A_816_5.3.236.mgf | 0            | 0            | 0        | 0                | 0                | 67    | 76  | Pyro-glu from Q | Q1:Pyro-glu from Q:1.000.00                            |
| K.ENGNLNPANM(+15.99)DSAATDLGHFESAENEDGK.F | Y    | 108.80 | 3306.4006 | 31     | 11.4 | 1103.1488 | 3 | 43.68 | 2        | F2:107793 | 20210611-09_2021021-OK160A_816_5.3.236.mgf |              | 0            | 0        | 0                | 0                | 94    | 124 |                 | M11:Oxidation (M):10.00.00                             |
| K.SPFDSEDLGNFM(+15.99)NFM(+15.99)K.E      | N    | 104.89 | 1966.8076 | 17     | 2.8  | 984.4097  | 2 | 45.96 | 2        | F2:112336 | 20210611-09_2021021-OK160A_816_5.3.236.mgf | 0            | 0            | 0        | 0                | 0                | 77    | 93  |                 | M13:Oxidation (M):10.00.00; M16:Oxidation (M):10.00.00 |

**total 11 peptides**

[illegible]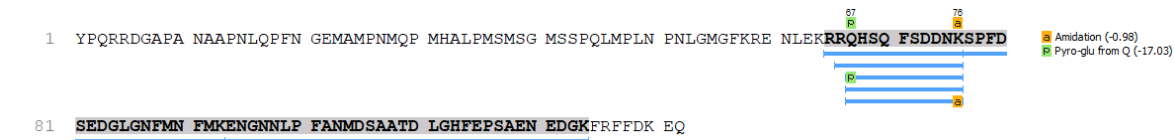[illegible]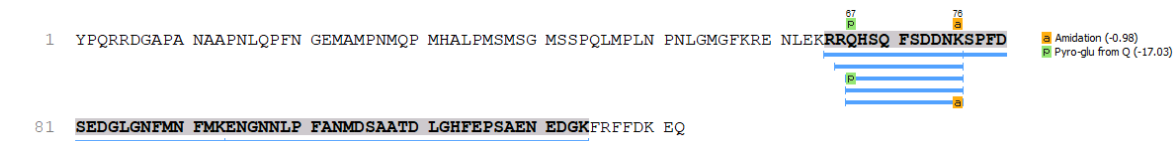

| Peptide                                     | Uniq | ~10lgP | Mass      | Length | ppm  | m/z       | z | RT    | Fraction | Scan      | Source File                                | Area<br>ebraeus | Area<br>judaeus | #Feature | #Feature<br>ebraeus | #Feature<br>judaeus | Start | End | PTM             | AScore                                                 |
|---------------------------------------------|------|--------|-----------|--------|------|-----------|---|-------|----------|-----------|--------------------------------------------|-----------------|-----------------|----------|---------------------|---------------------|-------|-----|-----------------|--------------------------------------------------------|
| K.ENGNNLPFANMDSAATDLGHFEPSEAENEDGK.F        | Y    | 125.47 | 3290.4058 | 31     | 10.2 | 1097.8158 | 3 | 50.09 | 2        | F2:119029 | 20210611-09_2021021-OK160A_816_5.3.236.mgf |                 | 0               | 0        | 0                   | 0                   | 94    | 124 |                 |                                                        |
| R.Q(-17.03)HSQFSDDNK.S                      | N    | 112.62 | 1187.4843 | 10     | 2.1  | 594.7482  | 2 | 13.73 | 2        | F2:57082  | 20210611-09_2021021-OK160A_816_5.3.236.mgf | 0               | 0               | 0        | 0                   | 0                   | 67    | 76  | Pyro-glu from Q | Q1:Pyro-glu from Q:1 000.00                            |
| K.ENGNLNPANM(+15.99)DSAATDLGHFEPSEAENEDGK.F | Y    | 108.80 | 3306.4006 | 31     | 11.4 | 1103.1488 | 3 | 43.68 | 2        | F2:107793 | 20210611-09_2021021-OK160A_816_5.3.236.mgf |                 | 0               | 0        | 0                   | 0                   | 94    | 124 |                 | M11:Oxidation (M):10 00.00                             |
| K.SPFDSEDLGNFM(+15.99)NFM(+15.99)K.E        | N    | 104.89 | 1966.8076 | 17     | 2.8  | 984.4097  | 2 | 45.96 | 2        | F2:112336 | 20210611-09_2021021-OK160A_816_5.3.236.mgf | 0               | 0               | 0        | 0                   | 0                   | 77    | 93  |                 | M13:Oxidation (M):10 00.00; M16:Oxidation (M):10 00.00 |
| R.RQHSQFSDDNK.S                             | N    | 100.18 | 1360.6119 | 11     | 0.4  | 454.5429  | 3 | 6.44  | 2        | F2:52336  | 20210611-09_2021021-OK160A_816_5.3.236.mgf |                 | 0               | 0        | 0                   | 0                   | 66    | 76  |                 |                                                        |



| Peptide                                     | Uniq | -10lgP | Mass      | Length | ppm  | m/z       | z | RT    | Fraction | Scan      | Source File                                | Area<br>ebraeus | Area<br>judaews | #Feature | #Feature<br>ebraeus | #Feature<br>judaews | Start | End | PTM       | AScore                                            |
|---------------------------------------------|------|--------|-----------|--------|------|-----------|---|-------|----------|-----------|--------------------------------------------|-----------------|-----------------|----------|---------------------|---------------------|-------|-----|-----------|---------------------------------------------------|
| R.Q(-17.03)HSQFSDDNK(-.98).S                | N    | 90.51  | 1186.5002 | 10     | 2.1  | 594.2562  | 2 | 12.84 | 2        | F2:55863  | 20210611-09_2021021-OK160A_816_5.3.236.mgf |                 | 0               | 0        | 0                   | 0                   | 67    | 76  | Amidation | Q1:Pyro-glu from Q:1000.00; K10:Amidation:1000.00 |
| R.QHSQFSDDNK.S                              | N    | 87.11  | 1204.5109 | 10     | -2.8 | 603.2585  | 2 | 8.72  | 2        | F2:52560  | 20210611-09_2021021-OK160A_816_5.3.236.mgf |                 | 0               | 0        | 0                   | 0                   | 67    | 76  |           |                                                   |
| K.SPFDSEDLGNFMFMK.E                         | N    | 83.66  | 1934.8179 | 17     | 0.7  | 968.4128  | 2 | 59.14 | 2        | F2:131486 | 20210611-09_2021021-OK160A_816_5.3.236.mgf |                 | 0               | 0        | 0                   | 0                   | 77    | 93  |           |                                                   |
| K.E(-18.01)NGNNLPFANMDSAAATDLGHFESAENEDGK.F | Y    | 83.49  | 3272.3953 | 31     | 0.6  | 1091.8018 | 3 | 55.58 | 2        | F2:127016 | 20210611-09_2021021-OK160A_816_5.3.236.mgf |                 | 0               | 0        | 0                   | 0                   | 94    | 124 |           | E1:Pyro-glu from E:1000.00                        |
| K.SPFDSEDLGNFM(+15.99)NFMK.E                | N    | 76.38  | 1950.8127 | 17     | 2.4  | 976.4119  | 2 | 53.56 | 2        | F2:124496 | 20210611-09_2021021-OK160A_816_5.3.236.mgf |                 | 0               | 0        | 0                   | 0                   | 77    | 93  |           | M13:Oxidation (M):0.00                            |
| K.RRQHSQFSDDNK.S                            | N    | 72.54  | 1516.7130 | 12     | 10.8 | 506.5816  | 3 | 19.31 | 2        | F2:64986  | 20210611-09_2021021-OK160A_816_5.3.236.mgf |                 | 0               | 0        | 0                   | 0                   | 65    | 76  |           |                                                   |

**CebrOK033\_J\_011\_B2**

[| Protein Coverage](#) | [Supporting Peptides](#) |

### Protein Coverage:

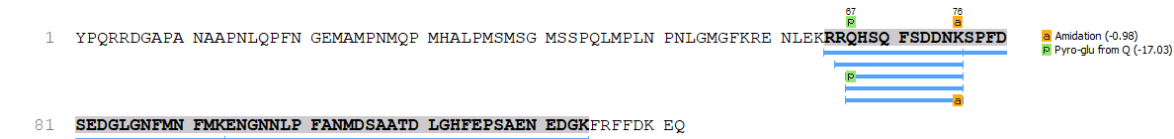

### Supporting Peptides:

| Peptide                                     | Uniq | -10lgP | Mass      | Length | ppm  | m/z       | z        | RT    | Fraction | Scan      | Source File                                | Area ebraeus                               | Area judaeus | #Feature ebraeus | #Feature judaeus | Start | End | PTM | AScore                                               |                                                        |
|---------------------------------------------|------|--------|-----------|--------|------|-----------|----------|-------|----------|-----------|--------------------------------------------|--------------------------------------------|--------------|------------------|------------------|-------|-----|-----|------------------------------------------------------|--------------------------------------------------------|
| K.ENGNLPPFANMDSAATDLGHFEPSEANEDGK.F         | Y    | 125.47 | 3290.4058 | 31     | 10.2 | 1097.8158 | 3        | 50.09 | 2        | F2:119029 | 20210611-09_2021021-OK160A_816_5.3.236.mgf |                                            | 0            | 0                | 0                | 0     | 94  | 124 |                                                      |                                                        |
| R.Q(-17.03)HSQFSDDNK.S                      | N    | 112.62 | 1187.4843 | 10     | 2.1  | 594.7482  | 2        | 13.73 | 2        | F2:57082  | 20210611-09_2021021-OK160A_816_5.3.236.mgf | 0                                          | 0            | 0                | 0                | 0     | 67  | 76  | Pyro-glu from Q                                      |                                                        |
| K.ENGNLPPFANM(+15.99)DSAATDLGHFEPSEANEDGK.F | Y    | 108.80 | 3306.4006 | 31     | 11.4 | 1103.1488 | 3        | 43.68 | 2        | F2:107793 | 20210611-09_2021021-OK160A_816_5.3.236.mgf |                                            | 0            | 0                | 0                | 0     | 94  | 124 | M11:Oxidation (M):10 00.00                           |                                                        |
| K.SPFDSEDLGNFM(+15.99)NFM(+15.99)K.E        | N    | 104.89 | 1966.8076 |        | 17   | 2.8       | 984.4097 | 2     | 45.96    | 2         | F2:112336                                  | 20210611-09_2021021-OK160A_816_5.3.236.mgf | 0            | 0                | 0                | 0     | 0   | 77  | 93                                                   | M13:Oxidation (M):10 00.00; M16:Oxidation (M):10 00.00 |
| R.RQHSQFSDDNK.S                             | N    | 100.18 | 1360.6119 | 11     | 0.4  | 454.5429  | 3        | 6.44  | 2        | F2:52336  | 20210611-09_2021021-OK160A_816_5.3.236.mgf |                                            | 0            | 0                | 0                | 0     | 66  | 76  |                                                      |                                                        |
| R.Q(-17.03)HSQFSDDNK(-.98).S                | N    | 90.51  | 1186.5002 | 10     | 2.1  | 594.2562  | 2        | 12.84 | 2        | F2:55863  | 20210611-09_2021021-OK160A_816_5.3.236.mgf |                                            | 0            | 0                | 0                | 0     | 67  | 76  | Amidation                                            |                                                        |
| R.QHSQFSDDNK.S                              | N    | 87.11  | 1204.5109 | 10     | -2.8 | 603.2585  | 2        | 8.72  | 2        | F2:52560  | 20210611-09_2021021-OK160A_816_5.3.236.mgf |                                            | 0            | 0                | 0                | 0     | 67  | 76  | Q1:Pyro-o-glu from Q:1 000.00; K10:Amidation:1000.00 |                                                        |
| K.SPFDSEDLGNFMNFMK.E                        | N    | 83.66  | 1934.8179 | 17     | 0.7  | 968.4128  | 2        | 59.14 | 2        | F2:131486 | 20210611-09_2021021-OK160A_816_5.3.236.mgf |                                            | 0            | 0                | 0                | 0     | 77  | 93  |                                                      |                                                        |
| K.E(-18.01)NGNLPFANMDSAATDLGHFEPSEANEDGK.F  | Y    | 83.49  | 3272.3953 | 31     | 0.6  | 1091.8018 | 3        | 55.58 | 2        | F2:127016 | 20210611-09_2021021-OK160A_816_5.3.236.mgf |                                            | 0            | 0                | 0                | 0     | 94  | 124 | E1:Pyro-glu from E:10 00.00                          |                                                        |
| K.SPFDSEDLGNFM(+15.99)NFMK.E                | N    | 76.38  | 1950.8127 | 17     | 2.4  | 976.4119  | 2        | 53.56 | 2        | F2:124496 | 20210611-09_2021021-OK160A_816_5.3.236.mgf |                                            | 0            | 0                | 0                | 0     | 77  | 93  | M13:Oxidation (M):0.0 0                              |                                                        |
| K.RRQHSQFSDDNK.S                            | N    | 72.54  | 1516.7130 | 12     | 10.8 | 506.5816  | 3        | 19.31 | 2        | F2:64986  | 20210611-09_2021021-OK160A_816_5.3.236.mgf |                                            | 0            | 0                | 0                | 0     | 65  | 76  |                                                      |                                                        |

**OK213\_E\_318\_PPI**

[| Protein Coverage](#) | [Supporting Peptides](#) |

### Protein Coverage:

1 MLASGIVLIL LVHAFALADD KPKGPKVTEK **VYFDIEIGGK** AAGRIVIGLF **GK**TVPKTVEN FKQLAIGEKE QDGKKLTYKG

81 SKFHRVIKDF MIQGGDFTRG DGTGGRSIYG EKFPDENFKL KHYGSGWLSM ANSGKDTNGS QFFITTKKTS WLDGRHVVFEG

161 TVLEGMDVVR KIEASKTDAR DKPEKDVVIA DCGALEVTKQ FSVEKSDAPE

### Supporting Peptides:

| Peptide                    | Uniq | -10lgP | Mass      | Length | ppm  | m/z      | z | RT    | Fraction | Scan      | Source File                                | Area ebraeus | Area judeaus | #Feature | #Feature ebraeus | #Feature judeaus | Start | End | PTM                      | AScore | Found By |
|----------------------------|------|--------|-----------|--------|------|----------|---|-------|----------|-----------|--------------------------------------------|--------------|--------------|----------|------------------|------------------|-------|-----|--------------------------|--------|----------|
| R.HVVFVGTLEGMDVVR.K        | Y    | 113.44 | 1656.8657 | 15     | -3.0 | 553.2919 | 3 | 47.54 | 2        | F2:114501 | 20210611-09_2021021-OK160A_816_5.3.236.mgf |              | 0            | 0        | 0                | 0                | 156   | 170 |                          |        | PEAKS DB |
| K.HYSGSWLSMANSKG.D         | Y    | 102.18 | 1493.6721 | 14     | -1.9 | 747.8388 | 2 | 32.18 | 2        | F2:87133  | 20210611-09_2021021-OK160A_816_5.3.236.mgf |              | 0            | 0        | 0                | 0                | 122   | 135 |                          |        | PEAKS DB |
| K.DTNGSQFFITTK.K           | N    | 100.10 | 1357.6514 | 12     | -0.1 | 679.8300 | 2 | 36.35 | 2        | F2:94879  | 20210611-09_2021021-OK160A_816_5.3.236.mgf |              | 0            | 0        | 0                | 0                | 136   | 147 |                          |        | PEAKS DB |
| K.DFMIQGGDFTR.G            | Y    | 81.64  | 1285.5760 | 11     | 1.3  | 643.7935 | 2 | 41.06 | 2        | F2:103152 | 20210611-09_2021021-OK160A_816_5.3.236.mgf |              | 0            | 0        | 0                | 0                | 89    | 99  |                          |        | PEAKS DB |
| K.HYSGSWLSM(+15.99)ANSKG.D | Y    | 76.18  | 1509.6670 | 14     | -0.9 | 755.8369 | 2 | 25.39 | 2        | F2:75315  | 20210611-09_2021021-OK160A_816_5.3.236.mgf |              | 0            | 0        | 0                | 0                | 122   | 135 | M9:Oxidation (M):1000.00 |        | PEAKS DB |
| K.VYFDIEIGGK.A             | Y    | 74.78  | 1139.5862 | 10     | -2.7 | 570.7964 | 2 | 44.43 | 2        | F2:109368 | 20210611-09_2021021-OK160A_816_5.3.236.mgf |              | 0            | 0        | 0                | 0                | 31    | 40  |                          |        | PEAKS DB |
| R.IVIGLFGK.T               | N    | 64.69  | 845.5374  | 8      | -0.9 | 423.7738 | 2 | 44.37 | 2        | F2:109266 | 20210611-09_2021021-OK160A_816_5.3.236.mgf |              | 0            | 0        | 0                | 0                | 45    | 52  |                          |        | PEAKS DB |
| K.KTSLWDGR.H               | Y    | 59.35  | 961.4981  | 8      | 3.7  | 481.7561 | 2 | 20.75 | 2        | F2:67312  | 20210611-09_2021021-OK160A_816_5.3.236.mgf |              | 0            | 0        | 0                | 0                | 148   | 155 |                          |        | PEAKS DB |

**SRX1323887\_E\_240\_PPI**

| [Protein Coverage](#) | [Supporting Peptides](#) |**Protein Coverage:**

1 MLASGLVLIL LVHAFALADD KPKGPKVTEK VYFDIEIGGK AAGRIVIGLF GKTVPKTVEN FKQLAIGEKE QDGKKLTYKG

81 SKFHRVIKDF MIQGGDFTRG DGTGGRSIYG EKFPDENFKL KHYGSGWLSM ANSGKDTNGS QFFITTKKTS WLDGRHVVFG

161 TVLEGMDVVR KIEASKTDAR DKPEKDVVIA DCGALEVTQ FSV EK RDAPE

Supporting Peptides:

| Peptide                     | Uniq | -10lgP | Mass      | Length | ppm  | m/z      | z | RT    | Fraction | Scan      | Source File                                | Area ebraeus | Area judaeus | #Feature | #Feature ebraeus | #Feature judaeus | Start | End | PTM                      | AScore | Found By |
|-----------------------------|------|--------|-----------|--------|------|----------|---|-------|----------|-----------|--------------------------------------------|--------------|--------------|----------|------------------|------------------|-------|-----|--------------------------|--------|----------|
| R.HVFGTVLEGMDVVR.K          | Y    | 113.44 | 1656.8657 | 15     | -3.0 | 553.2919 | 3 | 47.54 | 2        | F2:114501 | 20210611-09_2021021-OK160A_816_5.3.236.mgf |              | 0            | 0        | 0                | 0                | 156   | 170 |                          |        | PEAKS DB |
| K.HYGSGWLSMANSGK.D          | Y    | 102.18 | 1493.6721 | 14     | -1.9 | 747.8388 | 2 | 32.18 | 2        | F2:87133  | 20210611-09_2021021-OK160A_816_5.3.236.mgf |              | 0            | 0        | 0                | 0                | 122   | 135 |                          |        | PEAKS DB |
| K.DTNGSQFFITTK.K            | N    | 100.10 | 1357.6514 | 12     | -0.1 | 679.8300 | 2 | 36.35 | 2        | F2:94879  | 20210611-09_2021021-OK160A_816_5.3.236.mgf |              | 0            | 0        | 0                | 0                | 136   | 147 |                          |        | PEAKS DB |
| K.DFMIQGGDFTR.G             | Y    | 81.64  | 1285.5760 | 11     | 1.3  | 643.7935 | 2 | 41.06 | 2        | F2:103152 | 20210611-09_2021021-OK160A_816_5.3.236.mgf |              | 0            | 0        | 0                | 0                | 89    | 99  |                          |        | PEAKS DB |
| K.HYGSGWLSM(+15.99)ANS GK.D | Y    | 76.18  | 1509.6670 | 14     | -0.9 | 755.8369 | 2 | 25.39 | 2        | F2:75315  | 20210611-09_2021021-OK160A_816_5.3.236.mgf |              | 0            | 0        | 0                | 0                | 122   | 135 | M9:Oxidation (M):1000.00 |        | PEAKS DB |
| K.VYFDIEIGGK.A              | Y    | 74.78  | 1139.5862 | 10     | -2.7 | 570.7964 | 2 | 44.43 | 2        | F2:109368 | 20210611-09_2021021-OK160A_816_5.3.236.mgf |              | 0            | 0        | 0                | 0                | 31    | 40  |                          |        | PEAKS DB |
| R.IVIGLFGK.T                | N    | 64.69  | 845.5374  | 8      | -0.9 | 423.7738 | 2 | 44.37 | 2        | F2:109266 | 20210611-09_2021021-OK160A_816_5.3.236.mgf |              | 0            | 0        | 0                | 0                | 45    | 52  |                          |        | PEAKS DB |
| K.KTSLWDLGR.H               | Y    | 59.35  | 961.4981  | 8      | 3.7  | 481.7561 | 2 | 20.75 | 2        | F2:67312  | 20210611-09_2021021-OK160A_816_5.3.236.mgf |              | 0            | 0        | 0                | 0                | 148   | 155 |                          |        | PEAKS DB |
| total 8 peptides            |      |        |           |        |      |          |   |       |          |           |                                            |              |              |          |                  |                  |       |     |                          |        |          |

CebrOK033\_J\_257\_PPI

[back to list](#)

| [Protein Coverage](#) | [Supporting Peptides](#) |

Protein Coverage:

1 MLASGLVLIL LVHAFALADD KPKGPKVTEK VYFDIEIGGK AAGRIVIGLF GKTVPKTVEN FKQLAIGEKE QDGKKLTYKG

81 SKFHRVIKDF MIQGGDFTRG DGTGGRSIYG EKFPDENFKL KHYGSGWLSM ANSGKDTNGS QFFITTKKTS WLDGRHVVFG

161 TVLEGMDVVR KIEASKTDAR DKPENGC GAE D

Supporting Peptides:

| Peptide                     | Uniq | -10lgP | Mass      | Length | ppm  | m/z      | z | RT    | Fraction | Scan      | Source File                                | Area ebraeus | Area judaeus | #Feature | #Feature ebraeus | #Feature judaeus | Start | End | PTM                      | AScore | Found By |
|-----------------------------|------|--------|-----------|--------|------|----------|---|-------|----------|-----------|--------------------------------------------|--------------|--------------|----------|------------------|------------------|-------|-----|--------------------------|--------|----------|
| R.HVFGTVLEGMDVVR.K          | Y    | 113.44 | 1656.8657 | 15     | -3.0 | 553.2919 | 3 | 47.54 | 2        | F2:114501 | 20210611-09_2021021-OK160A_816_5.3.236.mgf |              | 0            | 0        | 0                | 0                | 156   | 170 |                          |        | PEAKS DB |
| K.HYGSGWLSMANSGK.D          | Y    | 102.18 | 1493.6721 | 14     | -1.9 | 747.8388 | 2 | 32.18 | 2        | F2:87133  | 20210611-09_2021021-OK160A_816_5.3.236.mgf |              | 0            | 0        | 0                | 0                | 122   | 135 |                          |        | PEAKS DB |
| K.DTNGSQFFITTK.K            | N    | 100.10 | 1357.6514 | 12     | -0.1 | 679.8300 | 2 | 36.35 | 2        | F2:94879  | 20210611-09_2021021-OK160A_816_5.3.236.mgf |              | 0            | 0        | 0                | 0                | 136   | 147 |                          |        | PEAKS DB |
| K.DFMIQGGDFTR.G             | Y    | 81.64  | 1285.5760 | 11     | 1.3  | 643.7935 | 2 | 41.06 | 2        | F2:103152 | 20210611-09_2021021-OK160A_816_5.3.236.mgf |              | 0            | 0        | 0                | 0                | 89    | 99  |                          |        | PEAKS DB |
| K.HYGSGWLSM(+15.99)ANS GK.D | Y    | 76.18  | 1509.6670 | 14     | -0.9 | 755.8369 | 2 | 25.39 | 2        | F2:75315  | 20210611-09_2021021-OK160A_816_5.3.236.mgf |              | 0            | 0        | 0                | 0                | 122   | 135 | M9:Oxidation (M):1000.00 |        | PEAKS DB |
| K.VYFDIEIGGK.A              | Y    | 74.78  | 1139.5862 | 10     | -2.7 | 570.7964 | 2 | 44.43 | 2        | F2:109368 | 20210611-09_2021021-OK160A_816_5.3.236.mgf |              | 0            | 0        | 0                | 0                | 31    | 40  |                          |        | PEAKS DB |
| R.IVIGLFGK.T                | N    | 64.69  | 845.5374  | 8      | -0.9 | 423.7738 | 2 | 44.37 | 2        | F2:109266 | 20210611-09_2021021-OK160A_816_5.3.236.mgf |              | 0            | 0        | 0                | 0                | 45    | 52  |                          |        | PEAKS DB |
| K.KTSLWDLGR.H               | Y    | 59.35  | 961.4981  | 8      | 3.7  | 481.7561 | 2 | 20.75 | 2        | F2:67312  | 20210611-09_2021021-OK160A_816_5.3.236.mgf |              | 0            | 0        | 0                | 0                | 148   | 155 |                          |        | PEAKS DB |
| total 8 peptides            |      |        |           |        |      |          |   |       |          |           |                                            |              |              |          |                  |                  |       |     |                          |        |          |

CebrOK033\_J\_256\_PPI

[back to list](#)

| [Protein Coverage](#) | [Supporting Peptides](#) |

Protein Coverage:

1 MLASGLVLIL LVHAFALADD KPKGPKVTEK VYFDIEIGGK AAGRIVIGLF GKTVPKTVEN FKQLAIGEKE QDGKKLTYKG

81 SKFHRVIKDF MIQGGDFTRG DGTGGRSIYG EKFPDENFKL KHYGSGWLSM ANSGKDTNGS QFFITTKKTS WLDGRHVVFG

161 TVLEGMDVVR KIEASKTDAR DKPEKDVVIA DCGALEVTQ FSV EK RDAPE

Supporting Peptides:

| Peptide                     | Uniq | -10lgP | Mass      | Length | ppm  | m/z      | z | RT    | Fraction | Scan      | Source File                                | Area ebraeus | Area judaeus | #Feature | #Feature ebraeus | #Feature judaeus | Start | End | PTM                      | AScore | Found By |
|-----------------------------|------|--------|-----------|--------|------|----------|---|-------|----------|-----------|--------------------------------------------|--------------|--------------|----------|------------------|------------------|-------|-----|--------------------------|--------|----------|
| R.HVFGTVLEGMDVVR.K          | Y    | 113.44 | 1656.8657 | 15     | -3.0 | 553.2919 | 3 | 47.54 | 2        | F2:114501 | 20210611-09_2021021-OK160A_816_5.3.236.mgf |              | 0            | 0        | 0                | 0                | 156   | 170 |                          |        | PEAKS DB |
| K.HYGSGWLSMANSGK.D          | Y    | 102.18 | 1493.6721 | 14     | -1.9 | 747.8388 | 2 | 32.18 | 2        | F2:87133  | 20210611-09_2021021-OK160A_816_5.3.236.mgf |              | 0            | 0        | 0                | 0                | 122   | 135 |                          |        | PEAKS DB |
| K.DTNGSQFFITTK.K            | N    | 100.10 | 1357.6514 | 12     | -0.1 | 679.8300 | 2 | 36.35 | 2        | F2:94879  | 20210611-09_2021021-OK160A_816_5.3.236.mgf |              | 0            | 0        | 0                | 0                | 136   | 147 |                          |        | PEAKS DB |
| K.DFMIQGGDFTR.G             | Y    | 81.64  | 1285.5760 | 11     | 1.3  | 643.7935 | 2 | 41.06 | 2        | F2:103152 | 20210611-09_2021021-OK160A_816_5.3.236.mgf |              | 0            | 0        | 0                | 0                | 89    | 99  |                          |        | PEAKS DB |
| K.HYGSGWLSM(+15.99)ANS GK.D | Y    | 76.18  | 1509.6670 | 14     | -0.9 | 755.8369 | 2 | 25.39 | 2        | F2:75315  | 20210611-09_2021021-OK160A_816_5.3.236.mgf |              | 0            | 0        | 0                | 0                | 122   | 135 | M9:Oxidation (M):1000.00 |        | PEAKS DB |
| K.VYFDIEIGGK.A              | Y    | 74.78  | 1139.5862 | 10     | -2.7 | 570.7964 | 2 | 44.43 | 2        | F2:109368 | 20210611-09_2021021-OK160A_816_5.3.236.mgf |              | 0            | 0        | 0                | 0                | 31    | 40  |                          |        | PEAKS DB |
| R.IVIGLFGK.T                | N    | 64.69  | 845.5374  | 8      | -0.9 | 423.7738 | 2 | 44.37 | 2        | F2:109266 | 20210611-09_2021021-OK160A_816_5.3.236.mgf |              | 0            | 0        | 0                | 0                | 45    | 52  |                          |        | PEAKS DB |
| K.KTSLWDLGR.H               | Y    | 59.35  | 961.4981  | 8      | 3.7  | 481.7561 | 2 | 20.75 | 2        | F2:67312  | 20210611-09_2021021-OK160A_816_5.3.236.mgf |              | 0            | 0        | 0                | 0                | 148   | 155 |                          |        | PEAKS DB |
| total 8 peptides            |      |        |           |        |      |          |   |       |          |           |                                            |              |              |          |                  |                  |       |     |                          |        |          |

OK005\_J\_311\_PPI

[back to list](#)

| [Protein Coverage](#) | [Supporting Peptides](#) |

Protein Coverage:

1 MLASGLVLIL LVHAFALADD KPKGPKVTEK VYFDIEIGGK AAGRIVIGLF GKTVPKTVEN FKQLAIGEKE QDGKKLTYKG

81 SKFHRVIKDF MIQGGDFTRG DGTGGRSIYG EKFPDENFKL KHYGSGWLSM ANSGKDTNGS QFFITTKKTS WLDGRHVVFG

161 TVLEGMDVVR KIEASKTDAR DKPEKDVVIA DCGALEVTQ FSV EK RDAPE

Supporting Peptides:

| Peptide            | Uniq | -10lgP | Mass      | Length | ppm  | m/z      | z | RT    | Fraction | Scan      | Source File                                | Area ebraeus | Area judaeus | #Feature | #Feature ebraeus | #Feature judaeus | Start | End | PTM | AScore | Found By |
|--------------------|------|--------|-----------|--------|------|----------|---|-------|----------|-----------|--------------------------------------------|--------------|--------------|----------|------------------|------------------|-------|-----|-----|--------|----------|
| R.HVFGTVLEGMDVVR.K | Y    | 113.44 | 1656.8657 | 15     | -3.0 | 553.2919 | 3 | 47.54 | 2        | F2:114501 | 20210611-09_2021021-OK160A_816_5.3.236.mgf |              | 0            | 0        | 0                | 0                | 156   | 170 |     |        | PEAKS DB |
| K.HYGSGWLSMANSGK.D | Y    | 102.18 | 1493.6721 | 14     | -1.9 | 747.8388 | 2 | 32.18 | 2        | F2:87133  | 20210611-09_2021021-OK160A_816_5.3.236.mgf |              | 0            | 0        | 0                | 0                | 122   | 135 |     |        | PEAKS DB |
| K.DTNGSQFFITTK.K   | N    | 100.10 | 1357.6514 | 12     | -0.1 | 679.8300 | 2 | 36.35 | 2        | F2:94879  | 20210611-09_2021021-OK160A_816_5.3.236.mgf |              | 0            | 0        | 0                | 0                | 136   | 147 |     |        | PEAKS DB |
| K.DFMIQGGDFTR.G    | Y    | 81.64  | 1285.5760 | 11     | 1.3  | 643.7935 | 2 | 41.06 | 2        | F2:103152 | 20210611-09_2021021-OK160A_816_5.3.236.mgf |              | 0            | 0        | 0                | 0                | 89    | 99  |     |        | PEAKS DB |

total 8 peptides

| Peptide                    | Uniq | -10lgP | Mass      | Length | ppm  | m/z      | z | RT    | Fraction | Scan      | Source File                                | Area ebraeus | Area judaeus | #Feature | #Feature ebraeus | #Feature judaeus | Start | End | PTM | AScore                   | Found By |
|----------------------------|------|--------|-----------|--------|------|----------|---|-------|----------|-----------|--------------------------------------------|--------------|--------------|----------|------------------|------------------|-------|-----|-----|--------------------------|----------|
| K.HYSGSWLSM(+15.99)ANSKG.D | Y    | 76.18  | 1509.6670 | 14     | -0.9 | 755.8369 | 2 | 25.39 | 2        | F2:75315  | 20210611-09_2021021-OK160A_816_5.3.236.mgf |              | 0            | 0        | 0                | 0                | 122   | 135 |     | M9:Oxidation (M):1000.00 | PEAKS DB |
| K.VYFDIEIGGK.A             | Y    | 74.78  | 1139.5862 | 10     | -2.7 | 570.7964 | 2 | 44.43 | 2        | F2:109368 | 20210611-09_2021021-OK160A_816_5.3.236.mgf |              | 0            | 0        | 0                | 0                | 31    | 40  |     |                          | PEAKS DB |
| R.IVIGLFGK.T               | N    | 64.69  | 845.5374  | 8      | -0.9 | 423.7738 | 2 | 44.37 | 2        | F2:109266 | 20210611-09_2021021-OK160A_816_5.3.236.mgf |              | 0            | 0        | 0                | 0                | 45    | 52  |     |                          | PEAKS DB |
| K.KTSWLDGR.H               | Y    | 59.35  | 961.4981  | 8      | 3.7  | 481.7561 | 2 | 20.75 | 2        | F2:67312  | 20210611-09_2021021-OK160A_816_5.3.236.mgf |              | 0            | 0        | 0                | 0                | 148   | 155 |     |                          | PEAKS DB |
| total 8 peptides           |      |        |           |        |      |          |   |       |          |           |                                            |              |              |          |                  |                  |       |     |     |                          |          |

OK006\_E\_286\_PPI

[back to list](#)

| [Protein Coverage](#) | [Supporting Peptides](#) |

Protein Coverage:

- 1 MLASGIVLIL LVHAFALADD KPKGPKVTEK VYFDIEIGGK AAGRIVIGLF GKTVPKTVEN FKQLAIGEKE QDGKKLTYKG
- 81 SKFHRVIKDF MIQGGDFTRG DGTGGRSIYG EKFPDENFKL KHYSGWLSM ANSGKDTNGS QFFITKKTS WLDGRHVVFG
- 161 TVLEGMDVVR KIEASKTDAR DKPEKDVVIA DCGALEVTQK FSVEKRAPE

Supporting Peptides:

| Peptide                    | Uniq | -10lgP | Mass      | Length | ppm  | m/z      | z | RT    | Fraction | Scan      | Source File                                | Area ebraeus | Area judaeus | #Feature | #Feature ebraeus | #Feature judaeus | Start | End | PTM | AScore                   | Found By |
|----------------------------|------|--------|-----------|--------|------|----------|---|-------|----------|-----------|--------------------------------------------|--------------|--------------|----------|------------------|------------------|-------|-----|-----|--------------------------|----------|
| R.HVFGTVLEGMDVVR.K         | Y    | 113.44 | 1656.8657 | 15     | -3.0 | 553.2919 | 3 | 47.54 | 2        | F2:114501 | 20210611-09_2021021-OK160A_816_5.3.236.mgf |              | 0            | 0        | 0                | 0                | 156   | 170 |     |                          | PEAKS DB |
| K.HYSGSWLSMANSKG.D         | Y    | 102.18 | 1493.6721 | 14     | -1.9 | 747.8388 | 2 | 32.18 | 2        | F2:87133  | 20210611-09_2021021-OK160A_816_5.3.236.mgf |              | 0            | 0        | 0                | 0                | 122   | 135 |     |                          | PEAKS DB |
| K.DTNGSQFITTK.K            | N    | 100.10 | 1357.6514 | 12     | -0.1 | 679.8300 | 2 | 36.35 | 2        | F2:94879  | 20210611-09_2021021-OK160A_816_5.3.236.mgf |              | 0            | 0        | 0                | 0                | 136   | 147 |     |                          | PEAKS DB |
| K.DFMIQGGDFTR.G            | Y    | 81.64  | 1285.5760 | 11     | 1.3  | 643.7935 | 2 | 41.06 | 2        | F2:103152 | 20210611-09_2021021-OK160A_816_5.3.236.mgf |              | 0            | 0        | 0                | 0                | 89    | 99  |     |                          | PEAKS DB |
| K.HYSGSWLSM(+15.99)ANSKG.D | Y    | 76.18  | 1509.6670 | 14     | -0.9 | 755.8369 | 2 | 25.39 | 2        | F2:75315  | 20210611-09_2021021-OK160A_816_5.3.236.mgf |              | 0            | 0        | 0                | 0                | 122   | 135 |     | M9:Oxidation (M):1000.00 | PEAKS DB |
| K.VYFDIEIGGK.A             | Y    | 74.78  | 1139.5862 | 10     | -2.7 | 570.7964 | 2 | 44.43 | 2        | F2:109368 | 20210611-09_2021021-OK160A_816_5.3.236.mgf |              | 0            | 0        | 0                | 0                | 31    | 40  |     |                          | PEAKS DB |
| R.IVIGLFGK.T               | N    | 64.69  | 845.5374  | 8      | -0.9 | 423.7738 | 2 | 44.37 | 2        | F2:109266 | 20210611-09_2021021-OK160A_816_5.3.236.mgf |              | 0            | 0        | 0                | 0                | 45    | 52  |     |                          | PEAKS DB |
| K.KTSWLDGR.H               | Y    | 59.35  | 961.4981  | 8      | 3.7  | 481.7561 | 2 | 20.75 | 2        | F2:67312  | 20210611-09_2021021-OK160A_816_5.3.236.mgf |              | 0            | 0        | 0                | 0                | 148   | 155 |     |                          | PEAKS DB |
| total 8 peptides           |      |        |           |        |      |          |   |       |          |           |                                            |              |              |          |                  |                  |       |     |     |                          |          |

OK193\_E\_264\_PPI

[back to list](#)

| [Protein Coverage](#) | [Supporting Peptides](#) |

Protein Coverage:

- 1 MLASGIVLIL LVHAFALADD KPKGPKVTEK VYFDIEIGGK AAGRIVIGLF GKTVPKTVEN FKQLAIGEKE QDGKKLTYKG
- 81 SKFHRVIKDF MIQGGDFTRG DGTGGRSIYG EKFPDENFKL KHYSGWLSM ANSGKDTNGS QFFITKKTS WLDGRHVVFG
- 161 TVLEGMDVVR KIEASKTDAR DKPEKDVVIA DCGALEVTQK FSVEKRAPE

Supporting Peptides:

| Peptide                    | Uniq | -10lgP | Mass      | Length | ppm  | m/z      | z | RT    | Fraction | Scan      | Source File                                | Area ebraeus | Area judaeus | #Feature | #Feature ebraeus | #Feature judaeus | Start | End | PTM | AScore                   | Found By |
|----------------------------|------|--------|-----------|--------|------|----------|---|-------|----------|-----------|--------------------------------------------|--------------|--------------|----------|------------------|------------------|-------|-----|-----|--------------------------|----------|
| R.HVFGTVLEGMDVVR.K         | Y    | 113.44 | 1656.8657 | 15     | -3.0 | 553.2919 | 3 | 47.54 | 2        | F2:114501 | 20210611-09_2021021-OK160A_816_5.3.236.mgf |              | 0            | 0        | 0                | 0                | 156   | 170 |     |                          | PEAKS DB |
| K.HYSGSWLSMANSKG.D         | Y    | 102.18 | 1493.6721 | 14     | -1.9 | 747.8388 | 2 | 32.18 | 2        | F2:87133  | 20210611-09_2021021-OK160A_816_5.3.236.mgf |              | 0            | 0        | 0                | 0                | 122   | 135 |     |                          | PEAKS DB |
| K.DTNGSQFITTK.K            | N    | 100.10 | 1357.6514 | 12     | -0.1 | 679.8300 | 2 | 36.35 | 2        | F2:94879  | 20210611-09_2021021-OK160A_816_5.3.236.mgf |              | 0            | 0        | 0                | 0                | 136   | 147 |     |                          | PEAKS DB |
| K.DFMIQGGDFTR.G            | Y    | 81.64  | 1285.5760 | 11     | 1.3  | 643.7935 | 2 | 41.06 | 2        | F2:103152 | 20210611-09_2021021-OK160A_816_5.3.236.mgf |              | 0            | 0        | 0                | 0                | 89    | 99  |     |                          | PEAKS DB |
| K.HYSGSWLSM(+15.99)ANSKG.D | Y    | 76.18  | 1509.6670 | 14     | -0.9 | 755.8369 | 2 | 25.39 | 2        | F2:75315  | 20210611-09_2021021-OK160A_816_5.3.236.mgf |              | 0            | 0        | 0                | 0                | 122   | 135 |     | M9:Oxidation (M):1000.00 | PEAKS DB |
| K.VYFDIEIGGK.A             | Y    | 74.78  | 1139.5862 | 10     | -2.7 | 570.7964 | 2 | 44.43 | 2        | F2:109368 | 20210611-09_2021021-OK160A_816_5.3.236.mgf |              | 0            | 0        | 0                | 0                | 31    | 40  |     |                          | PEAKS DB |
| R.IVIGLFGK.T               | N    | 64.69  | 845.5374  | 8      | -0.9 | 423.7738 | 2 | 44.37 | 2        | F2:109266 | 20210611-09_2021021-OK160A_816_5.3.236.mgf |              | 0            | 0        | 0                | 0                | 45    | 52  |     |                          | PEAKS DB |
| K.KTSWLDGR.H               | Y    | 59.35  | 961.4981  | 8      | 3.7  | 481.7561 | 2 | 20.75 | 2        | F2:67312  | 20210611-09_2021021-OK160A_816_5.3.236.mgf |              | 0            | 0        | 0                | 0                | 148   | 155 |     |                          | PEAKS DB |
| total 8 peptides           |      |        |           |        |      |          |   |       |          |           |                                            |              |              |          |                  |                  |       |     |     |                          |          |

OK214\_J\_328\_PPI

[back to list](#)

| [Protein Coverage](#) | [Supporting Peptides](#) |

Protein Coverage:

- 1 MLASGLVLIL LVHAFALADD KPKGPKVTEK VYFDIEIGGK AAGRIVIGLF GKTVPKTVEN FKQLAIGEKE QDGKKLTYKG
- 81 SKFHRVIKDF MIQGGDFTRG DGTGGRSIYG EKFPDENFKL KHYSGWLSM ANSGKDTNGS QFFITKKTS WLDGRHVVFG
- 161 TVLEGMDVVR KIEASKTDAR DKPEKDVVIA DCGALEVTQK FSVEKRAPE

Supporting Peptides:

| Peptide                    | Uniq | -10lgP | Mass      | Length | ppm  | m/z      | z | RT    | Fraction | Scan      | Source File                                | Area ebraeus | Area judaeus | #Feature | #Feature ebraeus | #Feature judaeus | Start | End | PTM | AScore                   | Found By |
|----------------------------|------|--------|-----------|--------|------|----------|---|-------|----------|-----------|--------------------------------------------|--------------|--------------|----------|------------------|------------------|-------|-----|-----|--------------------------|----------|
| R.HVFGTVLEGMDVVR.K         | Y    | 113.44 | 1656.8657 | 15     | -3.0 | 553.2919 | 3 | 47.54 | 2        | F2:114501 | 20210611-09_2021021-OK160A_816_5.3.236.mgf |              | 0            | 0        | 0                | 0                | 156   | 170 |     |                          | PEAKS DB |
| K.HYSGSWLSMANSKG.D         | Y    | 102.18 | 1493.6721 | 14     | -1.9 | 747.8388 | 2 | 32.18 | 2        | F2:87133  | 20210611-09_2021021-OK160A_816_5.3.236.mgf |              | 0            | 0        | 0                | 0                | 122   | 135 |     |                          | PEAKS DB |
| K.DTNGSQFITTK.K            | N    | 100.10 | 1357.6514 | 12     | -0.1 | 679.8300 | 2 | 36.35 | 2        | F2:94879  | 20210611-09_2021021-OK160A_816_5.3.236.mgf |              | 0            | 0        | 0                | 0                | 136   | 147 |     |                          | PEAKS DB |
| K.DFMIQGGDFTR.G            | Y    | 81.64  | 1285.5760 | 11     | 1.3  | 643.7935 | 2 | 41.06 | 2        | F2:103152 | 20210611-09_2021021-OK160A_816_5.3.236.mgf |              | 0            | 0        | 0                | 0                | 89    | 99  |     |                          | PEAKS DB |
| K.HYSGSWLSM(+15.99)ANSKG.D | Y    | 76.18  | 1509.6670 | 14     | -0.9 | 755.8369 | 2 | 25.39 | 2        | F2:75315  | 20210611-09_2021021-OK160A_816_5.3.236.mgf |              | 0            | 0        | 0                | 0                | 122   | 135 |     | M9:Oxidation (M):1000.00 | PEAKS DB |
| K.VYFDIEIGGK.A             | Y    | 74.78  | 1139.5862 | 10     | -2.7 | 570.7964 | 2 | 44.43 | 2        | F2:109368 | 20210611-09_2021021-OK160A_816_5.3.236.mgf |              | 0            | 0        | 0                | 0                | 31    | 40  |     |                          | PEAKS DB |
| R.IVIGLFGK.T               | N    | 64.69  | 845.5374  | 8      | -0.9 | 423.7738 | 2 | 44.37 | 2        | F2:109266 | 20210611-09_2021021-OK160A_816_5.3.236.mgf |              | 0            | 0        | 0                | 0                | 45    | 52  |     |                          | PEAKS DB |
| K.KTSWLDGR.H               | Y    | 59.35  | 961.4981  | 8      | 3.7  | 481.7561 | 2 | 20.75 | 2        | F2:67312  | 20210611-09_2021021-OK160A_816_5.3.236.mgf |              | 0            | 0        | 0                | 0                | 148   | 155 |     |                          | PEAKS DB |
| total 8 peptides           |      |        |           |        |      |          |   |       |          |           |                                            |              |              |          |                  |                  |       |     |     |                          |          |

OK212\_J\_315\_PPI

[back to list](#)

| [Protein Coverage](#) | [Supporting Peptides](#) |

Protein Coverage:

161 TVLEGM DVVR KIEASKTDAR DKPEKDVVIA DCGALEVTKQ FSVEKRDAPE

[illegible]

161 EIRRYQ.

| Peptide                  | Uniq | -10lgP | Mass      | Length | ppm  | m/z      | z | RT    | Fraction | Scan      | Source File                                | Area<br>ebraeus | Area<br>judaeus | #Feature | #Feature<br>ebraeus | #Feature<br>judaeus | Start | End | PTM           | AScore                   | Found<br>By |
|--------------------------|------|--------|-----------|--------|------|----------|---|-------|----------|-----------|--------------------------------------------|-----------------|-----------------|----------|---------------------|---------------------|-------|-----|---------------|--------------------------|-------------|
| R.DNIQGITKPAIR.R         | Y    | 108.08 | 1324.7462 | 12     | -0.2 | 663.3777 | 2 | 26.45 | 1        | F1:20382  | 20210611-08_2021021-OK192A_815_5.3.236.mgf | 0               | 0               | 0        | 0                   | 0                   | 25    | 36  |               |                          | PEAKS DB    |
| K.TVTAM(+15.99)DVVYALK.R | Y    | 94.21  | 1325.6901 | 12     | 1.3  | 663.8504 | 2 | 41.63 | 2        | F2:104257 | 20210611-09_2021021-OK160A_816_5.3.236.mgf | 0               | 0               | 0        | 0                   | 0                   | 81    | 92  | Oxidation (M) | M5:Oxidation (M):1000.00 | PEAKS DB    |
| K.TVTAMDVVYALK.R         | Y    | 92.03  | 1309.6952 | 12     | -2.5 | 655.8508 | 2 | 49.31 | 1        | F1:46803  | 20210611-08_2021021-OK192A_815_5.3.236.mgf | 0               | 0               | 0        | 0                   | 0                   | 81    | 92  |               |                          | PEAKS DB    |
| R.ISGLIYEETR.G           | Y    | 86.83  | 1179.6135 | 10     | 2.0  | 590.8127 | 2 | 32.27 | 2        | F2:87322  | 20210611-09_2021021-OK160A_816_5.3.236.mgf | 0               | 0               | 0        | 0                   | 0                   | 47    | 56  |               |                          | PEAKS DB    |
| R.DAVTYTEHAK.R           | Y    | 81.33  | 1133.5353 | 10     | -0.7 | 567.7722 | 2 | 14.83 | 2        | F2:58952  | 20210611-09_2021021-OK160A_816_5.3.236.mgf | 0               | 0               | 0        | 0                   | 0                   | 69    | 78  |               |                          | PEAKS DB    |
| K.VFLENVIR.D             | Y    | 78.88  | 988.5706  | 8      | 0.0  | 495.2905 | 2 | 40.54 | 2        | F2:102326 | 20210611-09_2021021-OK160A_816_5.3.236.mgf | 0               | 0               | 0        | 0                   | 0                   | 61    | 68  |               |                          | PEAKS DB    |
| R.YRPGTVALR.E            | Y    | 76.80  | 1031.5875 | 9      | 3.5  | 344.8697 | 3 | 20.19 | 1        | F1:11651  | 20210611-08_2021021-OK192A_815_5.3.236.mgf | 0               | 0               | 0        | 0                   | 0                   | 152   | 160 |               |                          | PEAKS DB    |
| K.STELLIR.K              | Y    | 63.42  | 830.4861  | 7      | 1.0  | 416.2490 | 2 | 28.31 | 2        | F2:80330  | 20210611-09_2021021-OK160A_816_5.3.236.mgf | 0               | 0               | 0        | 0                   | 0                   | 168   | 174 |               |                          | PEAKS DB    |
| R.EIAQDFK.T              | Y    | 53.31  | 849.4232  | 7      | 4.6  | 425.7192 | 2 | 20.63 | 1        | F1:12095  | 20210611-08_2021021-OK192A_815_5.3.236.mgf | 0               |                 | 0        | 0                   | 0                   | 184   | 190 |               |                          | PEAKS DB    |

**QUESTION:** How can I tell if my child has a learning disability?

[illegible]

110

| Peptide              | Uniq | -10lgP | Mass      | Length | ppm  | m/z      | z | RT    | Fraction | Scan      | Source File                                | Area<br>ebraeus | Area<br>judaews | #Feature | #Feature<br>ebraeus | #Feature<br>judaews | Start | End | PTM | AScore | Found<br>By |
|----------------------|------|--------|-----------|--------|------|----------|---|-------|----------|-----------|--------------------------------------------|-----------------|-----------------|----------|---------------------|---------------------|-------|-----|-----|--------|-------------|
| K.EAFSLFDKDGDTITTK.E | Y    | 109.55 | 1843.8839 | 17     | -1.4 | 615.6318 | 3 | 39.27 | 2        | F2:100164 | 20210611-09_2021021-OK160A_816_5.3.236.mgf | 0               | 0               | 0        | 0                   | 0                   | 15    | 31  |     |        | PEAKS<br>DB |

total 9 peptides







| Peptide                        | Uniq | -10lgP | Mass      | Length | ppm  | m/z       | z | RT    | Fraction | Scan     | Source File                                | Area ebraeus | Area judaeus | #Feature | #Feature ebraeus | #Feature judaeus | Start | End | PTM                                 | AScore                                                     | Found By |
|--------------------------------|------|--------|-----------|--------|------|-----------|---|-------|----------|----------|--------------------------------------------|--------------|--------------|----------|------------------|------------------|-------|-----|-------------------------------------|------------------------------------------------------------|----------|
| EEYDLNDPDVLAIVDEGQK.L          | Y    | 140.20 | 2161.0061 | 19     | 5.1  | 1081.5117 | 2 | 51.87 | 1        | F1:48359 | 20210611-08_2021021-OK192A_815_5.3.236.mgf | 0            | 0            | 0        | 0                | 0                | 1     | 19  |                                     |                                                            | PEAKS DB |
| K.YTYPWWK.L                    | Y    | 86.54  | 1157.5182 | 8      | 1.7  | 579.7651  | 2 | 41.86 | 1        | F1:39684 | 20210611-08_2021021-OK192A_815_5.3.236.mgf | 0            |              | 0        | 0                | 0                | 30    | 37  |                                     |                                                            | PEAKS DB |
| K.LMHAC(+57.02)SIANK.Y         | Y    | 78.32  | 1143.5529 | 10     | -0.6 | 382.1899  | 3 | 16.34 | 1        | F1:7558  | 20210611-08_2021021-OK192A_815_5.3.236.mgf | 0            |              | 0        | 0                | 0                | 20    | 29  | Carbamidomethylation                | C5:Carbamido methylation:1000.00                           | PEAKS DB |
| K.LM(+15.99)HAC(+57.02)SIANK.Y | Y    | 71.07  | 1159.5479 | 10     | 5.4  | 387.5238  | 3 | 12.10 | 1        | F1:3140  | 20210611-08_2021021-OK192A_815_5.3.236.mgf | 0            |              | 0        | 0                | 0                | 20    | 29  | Oxidation (M); Carbamidomethylation | M2:Oxidation (M):1000.00; C5:Carbamido methylation:1000.00 | PEAKS DB |
| K.LNILAFK.E                    | Y    | 61.32  | 817.5062  | 7      | 4.1  | 409.7605  | 2 | 42.63 | 1        | F1:40433 | 20210611-08_2021021-OK192A_815_5.3.236.mgf | 0            |              | 0        | 0                | 0                | 38    | 44  |                                     |                                                            | PEAKS DB |
| total 5 peptides               |      |        |           |        |      |           |   |       |          |          |                                            |              |              |          |                  |                  |       |     |                                     |                                                            |          |

OK214\_J\_037\_F

[back to list](#)

| [Protein Coverage](#) | [Supporting Peptides](#) |

Protein Coverage:

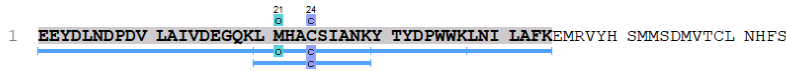

☒ Carbamidomethylation (+57.02)  
☒ Oxidation (M) (+15.99)

Supporting Peptides:

| Peptide                        | Uniq | -10lgP | Mass      | Length | ppm  | m/z       | z | RT    | Fraction | Scan     | Source File                                | Area ebraeus | Area judaeus | #Feature | #Feature ebraeus | #Feature judaeus | Start | End | PTM                                 | AScore                                                     | Found By |
|--------------------------------|------|--------|-----------|--------|------|-----------|---|-------|----------|----------|--------------------------------------------|--------------|--------------|----------|------------------|------------------|-------|-----|-------------------------------------|------------------------------------------------------------|----------|
| EEYDLNDPDVLAIVDEGQK.L          | Y    | 140.20 | 2161.0061 | 19     | 5.1  | 1081.5117 | 2 | 51.87 | 1        | F1:48359 | 20210611-08_2021021-OK192A_815_5.3.236.mgf | 0            | 0            | 0        | 0                | 0                | 1     | 19  |                                     |                                                            | PEAKS DB |
| K.YTYPWWK.L                    | Y    | 86.54  | 1157.5182 | 8      | 1.7  | 579.7651  | 2 | 41.86 | 1        | F1:39684 | 20210611-08_2021021-OK192A_815_5.3.236.mgf | 0            |              | 0        | 0                | 0                | 30    | 37  |                                     |                                                            | PEAKS DB |
| K.LMHAC(+57.02)SIANK.Y         | Y    | 78.32  | 1143.5529 | 10     | -0.6 | 382.1899  | 3 | 16.34 | 1        | F1:7558  | 20210611-08_2021021-OK192A_815_5.3.236.mgf | 0            |              | 0        | 0                | 0                | 20    | 29  | Carbamidomethylation                | C5:Carbamido methylation:1000.00                           | PEAKS DB |
| K.LM(+15.99)HAC(+57.02)SIANK.Y | Y    | 71.07  | 1159.5479 | 10     | 5.4  | 387.5238  | 3 | 12.10 | 1        | F1:3140  | 20210611-08_2021021-OK192A_815_5.3.236.mgf | 0            |              | 0        | 0                | 0                | 20    | 29  | Oxidation (M); Carbamidomethylation | M2:Oxidation (M):1000.00; C5:Carbamido methylation:1000.00 | PEAKS DB |
| K.LNILAFK.E                    | Y    | 61.32  | 817.5062  | 7      | 4.1  | 409.7605  | 2 | 42.63 | 1        | F1:40433 | 20210611-08_2021021-OK192A_815_5.3.236.mgf | 0            |              | 0        | 0                | 0                | 38    | 44  |                                     |                                                            | PEAKS DB |
| total 5 peptides               |      |        |           |        |      |           |   |       |          |          |                                            |              |              |          |                  |                  |       |     |                                     |                                                            |          |

OK005\_J\_033\_F

[back to list](#)

| [Protein Coverage](#) | [Supporting Peptides](#) |

Protein Coverage:

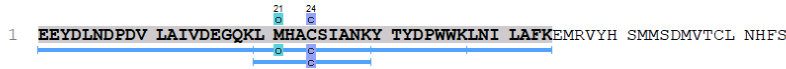

☒ Carbamidomethylation (+57.02)  
☒ Oxidation (M) (+15.99)

Supporting Peptides:

| Peptide                        | Uniq | -10lgP | Mass      | Length | ppm  | m/z       | z | RT    | Fraction | Scan     | Source File                                | Area ebraeus | Area judaeus | #Feature | #Feature ebraeus | #Feature judaeus | Start | End | PTM                                 | AScore                                                     | Found By |
|--------------------------------|------|--------|-----------|--------|------|-----------|---|-------|----------|----------|--------------------------------------------|--------------|--------------|----------|------------------|------------------|-------|-----|-------------------------------------|------------------------------------------------------------|----------|
| EEYDLNDPDVLAIVDEGQK.L          | Y    | 140.20 | 2161.0061 | 19     | 5.1  | 1081.5117 | 2 | 51.87 | 1        | F1:48359 | 20210611-08_2021021-OK192A_815_5.3.236.mgf | 0            | 0            | 0        | 0                | 0                | 1     | 19  |                                     |                                                            | PEAKS DB |
| K.YTYPWWK.L                    | Y    | 86.54  | 1157.5182 | 8      | 1.7  | 579.7651  | 2 | 41.86 | 1        | F1:39684 | 20210611-08_2021021-OK192A_815_5.3.236.mgf | 0            |              | 0        | 0                | 0                | 30    | 37  |                                     |                                                            | PEAKS DB |
| K.LMHAC(+57.02)SIANK.Y         | Y    | 78.32  | 1143.5529 | 10     | -0.6 | 382.1899  | 3 | 16.34 | 1        | F1:7558  | 20210611-08_2021021-OK192A_815_5.3.236.mgf | 0            |              | 0        | 0                | 0                | 20    | 29  | Carbamidomethylation                | C5:Carbamido methylation:1000.00                           | PEAKS DB |
| K.LM(+15.99)HAC(+57.02)SIANK.Y | Y    | 71.07  | 1159.5479 | 10     | 5.4  | 387.5238  | 3 | 12.10 | 1        | F1:3140  | 20210611-08_2021021-OK192A_815_5.3.236.mgf | 0            |              | 0        | 0                | 0                | 20    | 29  | Oxidation (M); Carbamidomethylation | M2:Oxidation (M):1000.00; C5:Carbamido methylation:1000.00 | PEAKS DB |
| K.LNILAFK.E                    | Y    | 61.32  | 817.5062  | 7      | 4.1  | 409.7605  | 2 | 42.63 | 1        | F1:40433 | 20210611-08_2021021-OK192A_815_5.3.236.mgf | 0            |              | 0        | 0                | 0                | 38    | 44  |                                     |                                                            | PEAKS DB |
| total 5 peptides               |      |        |           |        |      |           |   |       |          |          |                                            |              |              |          |                  |                  |       |     |                                     |                                                            |          |

OK193\_E\_033\_F

[back to list](#)

| [Protein Coverage](#) | [Supporting Peptides](#) |

Protein Coverage:

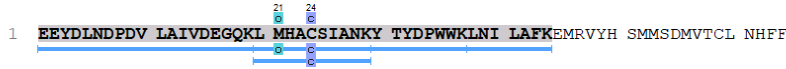

☒ Carbamidomethylation (+57.02)  
☒ Oxidation (M) (+15.99)

Supporting Peptides:

| Peptide                        | Uniq | -10lgP | Mass      | Length | ppm  | m/z       | z | RT    | Fraction | Scan     | Source File                                | Area ebraeus | Area judaeus | #Feature | #Feature ebraeus | #Feature judaeus | Start | End | PTM                                 | AScore                                                     | Found By |
|--------------------------------|------|--------|-----------|--------|------|-----------|---|-------|----------|----------|--------------------------------------------|--------------|--------------|----------|------------------|------------------|-------|-----|-------------------------------------|------------------------------------------------------------|----------|
| EEYDLNDPDVLAIVDEGQK.L          | Y    | 140.20 | 2161.0061 | 19     | 5.1  | 1081.5117 | 2 | 51.87 | 1        | F1:48359 | 20210611-08_2021021-OK192A_815_5.3.236.mgf | 0            | 0            | 0        | 0                | 0                | 1     | 19  |                                     |                                                            | PEAKS DB |
| K.YTYPWWK.L                    | Y    | 86.54  | 1157.5182 | 8      | 1.7  | 579.7651  | 2 | 41.86 | 1        | F1:39684 | 20210611-08_2021021-OK192A_815_5.3.236.mgf | 0            |              | 0        | 0                | 0                | 30    | 37  |                                     |                                                            | PEAKS DB |
| K.LMHAC(+57.02)SIANK.Y         | Y    | 78.32  | 1143.5529 | 10     | -0.6 | 382.1899  | 3 | 16.34 | 1        | F1:7558  | 20210611-08_2021021-OK192A_815_5.3.236.mgf | 0            |              | 0        | 0                | 0                | 20    | 29  | Carbamidomethylation                | C5:Carbamido methylation:1000.00                           | PEAKS DB |
| K.LM(+15.99)HAC(+57.02)SIANK.Y | Y    | 71.07  | 1159.5479 | 10     | 5.4  | 387.5238  | 3 | 12.10 | 1        | F1:3140  | 20210611-08_2021021-OK192A_815_5.3.236.mgf | 0            |              | 0        | 0                | 0                | 20    | 29  | Oxidation (M); Carbamidomethylation | M2:Oxidation (M):1000.00; C5:Carbamido methylation:1000.00 | PEAKS DB |
| K.LNILAFK.E                    | Y    | 61.32  | 817.5062  | 7      | 4.1  | 409.7605  | 2 | 42.63 | 1        | F1:40433 | 20210611-08_2021021-OK192A_815_5.3.236.mgf | 0            |              | 0        | 0                | 0                | 38    | 44  |                                     |                                                            | PEAKS DB |
| total 5 peptides               |      |        |           |        |      |           |   |       |          |          |                                            |              |              |          |                  |                  |       |     |                                     |                                                            |          |

CebrOK016\_E\_013\_F

[back to list](#)

| [Protein Coverage](#) | [Supporting Peptides](#) |

Protein Coverage:

- Carbamidomethylation (+57.02)
- Oxidation (M) (+15.99)

[illegible][back to list](#)

### Protein Coverage:

- Carbamidomethylation (+57.02)
- Oxidation (M) (+15.99)

[illegible]

[back to list](#)

### Protein Coverage:

- Carbamidomethylation (+57.02)
- Oxidation (M) (+15.99)

[illegible][back to list](#)

### Protein Coverage:

- Carbamidomethylation (+57.02)
- Oxidation (M) (+15.99)

[illegible]

| Peptide          | Uniq | -10lgP | Mass     | Length | ppm | m/z      | z | RT    | Fraction | Scan     | Source File                                | Area ebraeus | Area judaeus | #Feature | #Feature ebraeus | #Feature judaeus | Start | End | PTM | AScore | Found By |
|------------------|------|--------|----------|--------|-----|----------|---|-------|----------|----------|--------------------------------------------|--------------|--------------|----------|------------------|------------------|-------|-----|-----|--------|----------|
| K.LNILAFK.E      | Y    | 61.32  | 817.5062 | 7      | 4.1 | 409.7605 | 2 | 42.63 | 1        | F1:40433 | 20210611-08_2021021-OK192A_815_5.3.236.mgf | 0            |              | 0        | 0                | 0                | 38    | 44  |     |        | PEAKS DB |
| total 5 peptides |      |        |          |        |     |          |   |       |          |          |                                            |              |              |          |                  |                  |       |     |     |        |          |

gene:107300483

back to list

| [Protein Coverage](#) | [Supporting Peptides](#) |

Protein Coverage:

1 MSSMNPEYDY LFK**LLIGDS GV**GK**SC**LLLR **FADDTYTESY ISTIGVDFK**I RTIELDGKTI K**LQIWDTAGO ER**FRITITSSY

81 YRGAGHIIVV YDVTDQESFN NVK**QWLQEI**D RYASENVNKL LVGNKCDLTT **KKVVDYTTAK** EFADSLGIPF LETSAKNATN

161 VEQSFMTMAA EIKKRMGPGA TSGGAESNV RIQSTPVKQS SGGCC

Supporting Peptides:

| Peptide                | Uniq | -10lgP | Mass      | Length | ppm | m/z       | z | RT    | Fraction | Scan      | Source File                                | Area ebraeus | Area judaeus | #Feature | #Feature ebraeus | #Feature judaeus | Start | End | PTM | AScore | Found By |
|------------------------|------|--------|-----------|--------|-----|-----------|---|-------|----------|-----------|--------------------------------------------|--------------|--------------|----------|------------------|------------------|-------|-----|-----|--------|----------|
| R.FADDTYTESYSTIGVDFK.I | Y    | 123.83 | 2170.9946 | 19     | 5.6 | 1086.5061 | 2 | 53.75 | 2        | F2:124908 | 20210611-09_2021021-OK160A_816_5.3.236.mgf |              | 0            | 0        | 0                | 0                | 31    | 49  |     |        | PEAKS DB |
| K.LQIWDTAGQER.F        | Y    | 87.15  | 1315.6521 | 11     | 3.6 | 658.8332  | 2 | 34.94 | 1        | F1:31834  | 20210611-08_2021021-OK192A_815_5.3.236.mgf | 0            | 0            | 0        | 0                | 0                | 62    | 72  |     |        | PEAKS DB |
| K.KVVDYTTAK.E          | Y    | 79.72  | 1023.5601 | 9      | 2.7 | 512.7866  | 2 | 14.04 | 2        | F2:57561  | 20210611-09_2021021-OK160A_816_5.3.236.mgf |              | 0            | 0        | 0                | 0                | 132   | 140 |     |        | PEAKS DB |
| K.LLIGDSGVGK.S         | Y    | 69.42  | 1070.6335 | 11     | 2.2 | 536.3230  | 2 | 39.02 | 2        | F2:99655  | 20210611-09_2021021-OK160A_816_5.3.236.mgf | 0            | 0            | 0        | 0                | 0                | 14    | 24  |     |        | PEAKS DB |
| K.QWLQEIDR.Y           | Y    | 63.37  | 1086.5458 | 8      | 1.6 | 544.2787  | 2 | 35.15 | 2        | F2:92812  | 20210611-09_2021021-OK160A_816_5.3.236.mgf |              | 0            | 0        | 0                | 0                | 104   | 111 |     |        | PEAKS DB |
| total 5 peptides       |      |        |           |        |     |           |   |       |          |           |                                            |              |              |          |                  |                  |       |     |     |        |          |

OK214\_J\_343\_CAP

back to list

| [Protein Coverage](#) | [Supporting Peptides](#) |

Protein Coverage:

1 MPALAPSAFV LLLSLAVVTG HSVSGMEGHG QSLGLSTVER **RAAGAGFS**DS **EKA**VLVEVHN **TLR**NGVKPPA TNMKPMTWSK

81 ELEDIAKAFV AKCHFGHNSQ **RSSQSETFDY VGENVMSSG** KVANPKDVVQ VWYNEVHNYN YNTNSCLAGK MCGHYTQVVW

161 ADSHALGCAR QSCPGGTSLV VCNYPGGGNW **RGERPYQTQE**

Supporting Peptides:

| Peptide                          | Uniq | -10lgP | Mass      | Length | ppm | m/z       | z | RT    | Fraction | Scan      | Source File                                | Area ebraeus | Area judaeus | #Feature | #Feature ebraeus | #Feature judaeus | Start | End | PTM                       | AScore | Found By |
|----------------------------------|------|--------|-----------|--------|-----|-----------|---|-------|----------|-----------|--------------------------------------------|--------------|--------------|----------|------------------|------------------|-------|-----|---------------------------|--------|----------|
| R.SSQSETFDYVGENVMSSGK.V          | Y    | 129.39 | 2213.9424 | 20     | 9.0 | 1107.9838 | 2 | 40.63 | 2        | F2:102340 | 20210611-09_2021021-OK160A_816_5.3.236.mgf |              | 0            | 0        | 0                | 0                | 102   | 121 |                           |        | PEAKS DB |
| R.AAGAGFSDEK.A                   | Y    | 94.35  | 1038.4618 | 11     | 5.8 | 520.2390  | 2 | 14.56 | 2        | F2:58531  | 20210611-09_2021021-OK160A_816_5.3.236.mgf | 0            | 0            | 0        | 0                | 0                | 42    | 52  |                           |        | PEAKS DB |
| K.AVLVEVHNTLR.N                  | Y    | 92.95  | 1249.7142 | 11     | 1.0 | 625.8624  | 2 | 28.19 | 2        | F2:80198  | 20210611-09_2021021-OK160A_816_5.3.236.mgf |              | 0            | 0        | 0                | 0                | 53    | 63  |                           |        | PEAKS DB |
| R.SSQSETFDYVGENVYM(+15.99)SSGK.V | Y    | 90.88  | 2229.9373 | 20     | 3.7 | 1115.9753 | 2 | 37.15 | 2        | F2:96338  | 20210611-09_2021021-OK160A_816_5.3.236.mgf |              | 0            | 0        | 0                | 0                | 102   | 121 | M16:Oxidation (M):1000.00 |        | PEAKS DB |
| R.GERPYYTQE                      | Y    | 65.43  | 1106.4993 | 9      | 0.2 | 554.2547  | 2 | 13.28 | 2        | F2:56610  | 20210611-09_2021021-OK160A_816_5.3.236.mgf |              | 0            | 0        | 0                | 0                | 192   | 200 |                           |        | PEAKS DB |
| total 5 peptides                 |      |        |           |        |     |           |   |       |          |           |                                            |              |              |          |                  |                  |       |     |                           |        |          |

CebrOK033\_J\_271\_CAP

back to list

| [Protein Coverage](#) | [Supporting Peptides](#) |

Protein Coverage:

1 MPALAPSAFV LLLSLAVVTG HSVSGMEGHG QSLGLSTVER **RAAGAGFS**DS **EKA**VLVEVHN **TLR**NGVKPPA TNMKPMTWSK

81 ELEDIAKAFV AKCHFGHNSQ **RSSQSETFDY VGENVMSSG** KVANPKDVVQ VWYNEVHNYN YNTNSCLAGK MCGHYTQVVW

161 ADSHALGCAR QSCPGGTSLV VCNYPGGGNW **RGERPYQTQE**

Supporting Peptides:

| Peptide                          | Uniq | -10lgP | Mass      | Length | ppm | m/z       | z | RT    | Fraction | Scan      | Source File                                | Area ebraeus | Area judaeus | #Feature | #Feature ebraeus | #Feature judaeus | Start | End | PTM                       | AScore | Found By |
|----------------------------------|------|--------|-----------|--------|-----|-----------|---|-------|----------|-----------|--------------------------------------------|--------------|--------------|----------|------------------|------------------|-------|-----|---------------------------|--------|----------|
| R.SSQSETFDYVGENVMSSGK.V          | Y    | 129.39 | 2213.9424 | 20     | 9.0 | 1107.9838 | 2 | 40.63 | 2        | F2:102340 | 20210611-09_2021021-OK160A_816_5.3.236.mgf |              | 0            | 0        | 0                | 0                | 102   | 121 |                           |        | PEAKS DB |
| R.AAGAGFSDEK.A                   | Y    | 94.35  | 1038.4618 | 11     | 5.8 | 520.2390  | 2 | 14.56 | 2        | F2:58531  | 20210611-09_2021021-OK160A_816_5.3.236.mgf | 0            | 0            | 0        | 0                | 0                | 42    | 52  |                           |        | PEAKS DB |
| K.AVLVEVHNTLR.N                  | Y    | 92.95  | 1249.7142 | 11     | 1.0 | 625.8624  | 2 | 28.19 | 2        | F2:80198  | 20210611-09_2021021-OK160A_816_5.3.236.mgf |              | 0            | 0        | 0                | 0                | 53    | 63  |                           |        | PEAKS DB |
| R.SSQSETFDYVGENVYM(+15.99)SSGK.V | Y    | 90.88  | 2229.9373 | 20     | 3.7 | 1115.9753 | 2 | 37.15 | 2        | F2:96338  | 20210611-09_2021021-OK160A_816_5.3.236.mgf |              | 0            | 0        | 0                | 0                | 102   | 121 | M16:Oxidation (M):1000.00 |        | PEAKS DB |
| K.GERPYYTQE                      | Y    | 65.43  | 1106.4993 | 9      | 0.2 | 554.2547  | 2 | 13.28 | 2        | F2:56610  | 20210611-09_2021021-OK160A_816_5.3.236.mgf |              | 0            | 0        | 0                | 0                | 192   | 200 |                           |        | PEAKS DB |
| total 5 peptides                 |      |        |           |        |     |           |   |       |          |           |                                            |              |              |          |                  |                  |       |     |                           |        |          |

K\_0010\_139\_Ferritin

back to list

| [Protein Coverage](#) | [Supporting Peptides](#) |

Protein Coverage:

1 **FDRDDVALPG FAK**YFKEMSD EEREHA EKLM KYQNKRRGRV VLQDIKKPDR **DEWGTGLDAM QVALGLEK**SV NQALLELHKV

81 ATSHQDAQMT DFLEGEYLQE QVESIKK**IGD HIT**NLKR VGS GLGEYMF DKN LS

Supporting Peptides:

| Peptide                | Uniq | -10lgP | Mass      | Length | ppm | m/z      | z | RT    | Fraction | Scan      | Source File                                | Area ebraeus | Area judaeus | #Feature | #Feature ebraeus | #Feature judaeus | Start | End | PTM | AScore | Found By |
|------------------------|------|--------|-----------|--------|-----|----------|---|-------|----------|-----------|--------------------------------------------|--------------|--------------|----------|------------------|------------------|-------|-----|-----|--------|----------|
| R.DEWGTGLDAMQVALGLEK.S | N    | 116.51 | 1931.9298 | 18     | 1.8 | 966.9699 | 2 | 59.74 | 2        | F2:131980 | 20210611-09_2021021-OK160A_816_5.3.236.mgf |              | 0            | 0        | 0                | 0                | 51    | 68  |     |        | PEAKS DB |
| R.DDVALPGFAK.Y         | N    | 90.93  | 1031.5287 | 10     | 2.5 | 516.7708 | 2 | 38.01 | 2        | F2:97999  | 20210611-09_2021021-OK160A_816_5.3.236.mgf | 0            | 0            | 0        | 0                | 0                | 4     | 13  |     |        | PEAKS DB |
| K.IGDHITNLK.R          | N    | 89.25  | 1009.5556 | 9      | 5.8 | 505.7859 | 2 | 19.85 | 2        | F2:65725  | 20210611-09_2021021-OK160A_816_5.3.236.mgf |              | 0            | 0        | 0                | 0                | 108   | 116 |     |        | PEAKS DB |
| FDRDDVALPGFAK.Y        | Y    | 67.23  | 1449.7251 | 13     | 0.8 | 484.2473 | 3 | 38.48 | 2        | F2:98912  | 20210611-09_2021021-OK160A_816_5.3.236.mgf |              | 0            | 0        | 0                | 0                | 1     | 13  |     |        | PEAKS DB |
| total 4 peptides       |      |        |           |        |     |          |   |       |          |           |                                            |              |              |          |                  |                  |       |     |     |        |          |

OK212\_J\_216\_Cerm03

back to list

| [Protein Coverage](#) | [Supporting Peptides](#) |

Protein Coverage:

1 EISRP**RTIDGG EAGVLAGDRA** SNK**NALLQQR** LCP

Supporting Peptides:

| Peptide | Uniq | -10lgP | Mass | Length | ppm | m/z | z | RT | Fraction | Scan | Source File | Area<br>ebraeus | Area<br>judaeus | #Feature | #Feature<br>ebraeus | #Feature<br>judaeus | Start | End | PTM | AScore |
|---------|------|--------|------|--------|-----|-----|---|----|----------|------|-------------|-----------------|-----------------|----------|---------------------|---------------------|-------|-----|-----|--------|
|---------|------|--------|------|--------|-----|-----|---|----|----------|------|-------------|-----------------|-----------------|----------|---------------------|---------------------|-------|-----|-----|--------|

| Peptide                                | Uniq | -10lgP | Mass      | Length | ppm | m/z      | z | RT    | Fraction | Scan     | Source File                                | Area ebraeus | Area judaeus | #Feature | #Feature ebraeus | #Feature judaeus | Start | End | PTM                                 | AScore                                                                                  |
|----------------------------------------|------|--------|-----------|--------|-----|----------|---|-------|----------|----------|--------------------------------------------|--------------|--------------|----------|------------------|------------------|-------|-----|-------------------------------------|-----------------------------------------------------------------------------------------|
| K.NSQEC(+57.02)STDS DHTITVVK.R         | Y    | 103.57 | 1919.8530 | 17     | 2.4 | 960.9324 | 2 | 20.77 | 1        | F1:12236 | 20210611-08_2021021-OK192A_815_5.3.236.mgf | 0            |              | 0        | 0                | 0                | 39    | 55  | Carbamidomethylation                | C5:Carbamido methylation:1000.00                                                        |
| Q(-17.03)VC(+57.02)PTMTDSYAR.E         | Y    | 98.74  | 1410.5908 | 12     | 1.7 | 706.3012 | 2 | 33.96 | 1        | F1:30498 | 20210611-08_2021021-OK192A_815_5.3.236.mgf | 0            |              | 0        | 0                | 0                | 1     | 12  | Carbamidomethylation                | Q1:Pyr o-glu from Q:1000.00; C3:Carbamido methylation:1000.00                           |
| K.RYVNNQPER.K                          | Y    | 90.62  | 1174.5842 | 9      | 1.9 | 588.2983 | 2 | 10.46 | 1        | F1:1648  | 20210611-08_2021021-OK192A_815_5.3.236.mgf | 0            |              | 0        | 0                | 0                | 56    | 64  |                                     |                                                                                         |
| R.YVNNQPER.K                           | Y    | 81.98  | 1018.4832 | 8      | 6.8 | 510.2504 | 2 | 11.28 | 1        | F1:2421  | 20210611-08_2021021-OK192A_815_5.3.236.mgf | 0            |              | 0        | 0                | 0                | 57    | 64  |                                     |                                                                                         |
| Q(-17.03)VC(+57.02)PTM(+15.99)TDSYAR.E | Y    | 77.47  | 1426.5857 | 12     | 2.8 | 714.2994 | 2 | 27.52 | 1        | F1:21864 | 20210611-08_2021021-OK192A_815_5.3.236.mgf | 0            |              | 0        | 0                | 0                | 1     | 12  | Carbamidomethylation; Oxidation (M) | Q1:Pyr o-glu from Q:1000.00; C3:Carbamido methylation:1000.00; M6:Oxidation (M):1000.00 |

total 5 peptides

SRX1323887\_E\_218\_Tpra06

[back to list](#)

| [Protein Coverage](#) | [Supporting Peptides](#) |

Protein Coverage:

1

QVCPTMTDSYAR

ENECHYDH NLGKEVSGS CSSLNCNCKNS QECSTSDHT ITVVKRYVNN QPERKRYITC VALSSLNECS

81

GTQEALYVLT PEANELKSVK VLCRCPESTKV YLLARNPQRY VCTTAAQLST RTT

3

6

8

43

Carbamidomethylation (+57.02)

Oxidation (M) (+15.99)

Supporting Peptides:

| Peptide                                | Uniq | -10lgP | Mass      | Length | ppm | m/z      | z | RT    | Fraction | Scan     | Source File                                | Area ebraeus | Area judaeus | #Feature | #Feature ebraeus | #Feature judaeus | Start | End | PTM                                 | AScore                                                                                  |
|----------------------------------------|------|--------|-----------|--------|-----|----------|---|-------|----------|----------|--------------------------------------------|--------------|--------------|----------|------------------|------------------|-------|-----|-------------------------------------|-----------------------------------------------------------------------------------------|
| K.NSQEC(+57.02)STDS DHTITVVK.R         | Y    | 103.57 | 1919.8530 | 17     | 2.4 | 960.9324 | 2 | 20.77 | 1        | F1:12236 | 20210611-08_2021021-OK192A_815_5.3.236.mgf | 0            |              | 0        | 0                | 0                | 39    | 55  | Carbamidomethylation                | C5:Carbamido methylation:1000.00                                                        |
| Q(-17.03)VC(+57.02)PTMTDSYAR.E         | Y    | 98.74  | 1410.5908 | 12     | 1.7 | 706.3012 | 2 | 33.96 | 1        | F1:30498 | 20210611-08_2021021-OK192A_815_5.3.236.mgf | 0            |              | 0        | 0                | 0                | 1     | 12  | Carbamidomethylation                | Q1:Pyr o-glu from Q:1000.00; C3:Carbamido methylation:1000.00                           |
| K.RYVNNQPER.K                          | Y    | 90.62  | 1174.5842 | 9      | 1.9 | 588.2983 | 2 | 10.46 | 1        | F1:1648  | 20210611-08_2021021-OK192A_815_5.3.236.mgf | 0            |              | 0        | 0                | 0                | 56    | 64  |                                     |                                                                                         |
| R.YVNNQPER.K                           | Y    | 81.98  | 1018.4832 | 8      | 6.8 | 510.2504 | 2 | 11.28 | 1        | F1:2421  | 20210611-08_2021021-OK192A_815_5.3.236.mgf | 0            |              | 0        | 0                | 0                | 57    | 64  |                                     |                                                                                         |
| Q(-17.03)VC(+57.02)PTM(+15.99)TDSYAR.E | Y    | 77.47  | 1426.5857 | 12     | 2.8 | 714.2994 | 2 | 27.52 | 1        | F1:21864 | 20210611-08_2021021-OK192A_815_5.3.236.mgf | 0            |              | 0        | 0                | 0                | 1     | 12  | Carbamidomethylation; Oxidation (M) | Q1:Pyr o-glu from Q:1000.00; C3:Carbamido methylation:1000.00; M6:Oxidation (M):1000.00 |

total 5 peptides

CebrOK014\_E\_131\_Tpra06

[back to list](#)

| [Protein Coverage](#) | [Supporting Peptides](#) |

Protein Coverage:

1

QVCPTMTDSYAR

ENECHYDH NLGKEVSGS CSSLNCNCKNS QECSTSDHT ITVVKRYVNN QPERKRYITC VALSSLNECS

81

GTQEALYVLT PEANELKSVK VLCRCPESTKV YLLARNPQRY VCTTAAQLST RTT

3

6

8

43

Carbamidomethylation (+57.02)

Oxidation (M) (+15.99)

Supporting Peptides:

| Peptide                                | Uniq | -10lgP | Mass      | Length | ppm | m/z      | z | RT    | Fraction | Scan     | Source File                                | Area ebraeus | Area judaeus | #Feature | #Feature ebraeus | #Feature judaeus | Start | End | PTM                                 | AScore                                                                                  |
|----------------------------------------|------|--------|-----------|--------|-----|----------|---|-------|----------|----------|--------------------------------------------|--------------|--------------|----------|------------------|------------------|-------|-----|-------------------------------------|-----------------------------------------------------------------------------------------|
| K.NSQEC(+57.02)STDS DHTITVVK.R         | Y    | 103.57 | 1919.8530 | 17     | 2.4 | 960.9324 | 2 | 20.77 | 1        | F1:12236 | 20210611-08_2021021-OK192A_815_5.3.236.mgf | 0            |              | 0        | 0                | 0                | 39    | 55  | Carbamidomethylation                | C5:Carbamido methylation:1000.00                                                        |
| Q(-17.03)VC(+57.02)PTMTDSYAR.E         | Y    | 98.74  | 1410.5908 | 12     | 1.7 | 706.3012 | 2 | 33.96 | 1        | F1:30498 | 20210611-08_2021021-OK192A_815_5.3.236.mgf | 0            |              | 0        | 0                | 0                | 1     | 12  | Carbamidomethylation                | Q1:Pyr o-glu from Q:1000.00; C3:Carbamido methylation:1000.00                           |
| K.RYVNNQPER.K                          | Y    | 90.62  | 1174.5842 | 9      | 1.9 | 588.2983 | 2 | 10.46 | 1        | F1:1648  | 20210611-08_2021021-OK192A_815_5.3.236.mgf | 0            |              | 0        | 0                | 0                | 56    | 64  |                                     |                                                                                         |
| R.YVNNQPER.K                           | Y    | 81.98  | 1018.4832 | 8      | 6.8 | 510.2504 | 2 | 11.28 | 1        | F1:2421  | 20210611-08_2021021-OK192A_815_5.3.236.mgf | 0            |              | 0        | 0                | 0                | 57    | 64  |                                     |                                                                                         |
| Q(-17.03)VC(+57.02)PTM(+15.99)TDSYAR.E | Y    | 77.47  | 1426.5857 | 12     | 2.8 | 714.2994 | 2 | 27.52 | 1        | F1:21864 | 20210611-08_2021021-OK192A_815_5.3.236.mgf | 0            |              | 0        | 0                | 0                | 1     | 12  | Carbamidomethylation; Oxidation (M) | Q1:Pyr o-glu from Q:1000.00; C3:Carbamido methylation:1000.00; M6:Oxidation (M):1000.00 |

total 5 peptides

OK213\_E\_279\_Tpra06

[back to list](#)

| [Protein Coverage](#) | [Supporting Peptides](#) |

Protein Coverage:

1

36

8

43

5

QVCPMTDSY ARENECHYDH NLGKEVSGS CSSLCNCKNS QECSTSDHT ITVVKRYVNN QPERKRYITC VALSSLNECS

Carbamidomethylation (+57.02)

Oxidation (M) (+15.99)

81 GTQEALYVLT PEANELKSVK VLCRCPSTKV YLLARNPQRY VCTTAAQLST RTT

Supporting Peptides:

| Peptide                                | Uniq | -10lgP | Mass      | Length | ppm | m/z      | z | RT    | Fraction | Scan     | Source File                                 | Area ebraeus | Area judaeus | #Feature | #Feature ebraeus | #Feature judaeus | Start | End | PTM                                 | AScore                                                                                  |
|----------------------------------------|------|--------|-----------|--------|-----|----------|---|-------|----------|----------|---------------------------------------------|--------------|--------------|----------|------------------|------------------|-------|-----|-------------------------------------|-----------------------------------------------------------------------------------------|
| K.NSQEC(+57.02)STDSDHITIVVK.R          | Y    | 103.57 | 1919.8530 | 17     | 2.4 | 960.9324 | 2 | 20.77 | 1        | F1:12236 | 20210611-08_2021021-OK192A_815_5.3.236.mgff | 0            |              | 0        | 0                | 0                | 39    | 55  | Carbamidomethylation                | C5:Carbamido methylation:1000.00                                                        |
| Q(-17.03)VC(+57.02)PTMTDSYAR.E         | Y    | 98.74  | 1410.5908 | 12     | 1.7 | 706.3012 | 2 | 33.96 | 1        | F1:30498 | 20210611-08_2021021-OK192A_815_5.3.236.mgff | 0            |              | 0        | 0                | 0                | 1     | 12  | Carbamidomethylation                | Q1:Pyr o-glu from Q:1000.00; C3:Carbamido methylation:1000.00                           |
| K.RYVNNQPER.K                          | Y    | 90.62  | 1174.5842 | 9      | 1.9 | 588.2983 | 2 | 10.46 | 1        | F1:1648  | 20210611-08_2021021-OK192A_815_5.3.236.mgff | 0            |              | 0        | 0                | 0                | 56    | 64  |                                     |                                                                                         |
| R.YVNNQPER.K                           | Y    | 81.98  | 1018.4832 | 8      | 6.8 | 510.2504 | 2 | 11.28 | 1        | F1:2421  | 20210611-08_2021021-OK192A_815_5.3.236.mgff | 0            |              | 0        | 0                | 0                | 57    | 64  |                                     |                                                                                         |
| Q(-17.03)VC(+57.02)PTM(+15.99)TDSYAR.E | Y    | 77.47  | 1426.5857 | 12     | 2.8 | 714.2994 | 2 | 27.52 | 1        | F1:21864 | 20210611-08_2021021-OK192A_815_5.3.236.mgff | 0            |              | 0        | 0                | 0                | 1     | 12  | Carbamidomethylation; Oxidation (M) | Q1:Pyr o-glu from Q:1000.00; C3:Carbamido methylation:1000.00; M6:Oxidation (M):1000.00 |

total 5 peptides

OK006\_E\_261\_Tpra06

[back to list](#)

| [Protein Coverage](#) | [Supporting Peptides](#) |

Protein Coverage:

1

36

8

43

5

QVCPMTDSY ARENECHYDH NLGKEVSGS CSSLCNCKNS QECSTSDHT ITVVKRYVNN QPERKRYITC VALSSLNECS

Carbamidomethylation (+57.02)

Oxidation (M) (+15.99)

81 GTQEALYVLT PEANELKSVK VLCRCPSTKV YLLARNPQRY VCTTAAPLST RTT

Supporting Peptides:

| Peptide                                | Uniq | -10lgP | Mass      | Length | ppm | m/z      | z | RT    | Fraction | Scan     | Source File                                 | Area ebraeus | Area judaeus | #Feature | #Feature ebraeus | #Feature judaeus | Start | End | PTM                                 | AScore                                                                                  |
|----------------------------------------|------|--------|-----------|--------|-----|----------|---|-------|----------|----------|---------------------------------------------|--------------|--------------|----------|------------------|------------------|-------|-----|-------------------------------------|-----------------------------------------------------------------------------------------|
| K.NSQEC(+57.02)STDSDHITIVVK.R          | Y    | 103.57 | 1919.8530 | 17     | 2.4 | 960.9324 | 2 | 20.77 | 1        | F1:12236 | 20210611-08_2021021-OK192A_815_5.3.236.mgff | 0            |              | 0        | 0                | 0                | 39    | 55  | Carbamidomethylation                | C5:Carbamido methylation:1000.00                                                        |
| Q(-17.03)VC(+57.02)PTMTDSYAR.E         | Y    | 98.74  | 1410.5908 | 12     | 1.7 | 706.3012 | 2 | 33.96 | 1        | F1:30498 | 20210611-08_2021021-OK192A_815_5.3.236.mgff | 0            |              | 0        | 0                | 0                | 1     | 12  | Carbamidomethylation                | Q1:Pyr o-glu from Q:1000.00; C3:Carbamido methylation:1000.00                           |
| K.RYVNNQPER.K                          | Y    | 90.62  | 1174.5842 | 9      | 1.9 | 588.2983 | 2 | 10.46 | 1        | F1:1648  | 20210611-08_2021021-OK192A_815_5.3.236.mgff | 0            |              | 0        | 0                | 0                | 56    | 64  |                                     |                                                                                         |
| R.YVNNQPER.K                           | Y    | 81.98  | 1018.4832 | 8      | 6.8 | 510.2504 | 2 | 11.28 | 1        | F1:2421  | 20210611-08_2021021-OK192A_815_5.3.236.mgff | 0            |              | 0        | 0                | 0                | 57    | 64  |                                     |                                                                                         |
| Q(-17.03)VC(+57.02)PTM(+15.99)TDSYAR.E | Y    | 77.47  | 1426.5857 | 12     | 2.8 | 714.2994 | 2 | 27.52 | 1        | F1:21864 | 20210611-08_2021021-OK192A_815_5.3.236.mgff | 0            |              | 0        | 0                | 0                | 1     | 12  | Carbamidomethylation; Oxidation (M) | Q1:Pyr o-glu from Q:1000.00; C3:Carbamido methylation:1000.00; M6:Oxidation (M):1000.00 |

total 5 peptides

OK006\_E\_262\_Tpra06

[back to list](#)

| [Protein Coverage](#) | [Supporting Peptides](#) |

Protein Coverage:

1

36

8

43

5

QVCPMTDSY ARENECHYDH NLGKEVSGS SSSLCNCKNS QECSTSDHT ITVVKRYVNN QPERKRYITC VALSSLNECT

Carbamidomethylation (+57.02)

Oxidation (M) (+15.99)

81 GTQEALYVLT PEANELKSVK VLCRCPSTKV YLLARNPQRY VCTTAAPLST RTT

Supporting Peptides:

| Peptide                                | Uniq | -10lgP | Mass      | Length | ppm | m/z      | z | RT    | Fraction | Scan     | Source File                                 | Area ebraeus | Area judaeus | #Feature | #Feature ebraeus | #Feature judaeus | Start | End | PTM                                 | AScore                                                                                  |
|----------------------------------------|------|--------|-----------|--------|-----|----------|---|-------|----------|----------|---------------------------------------------|--------------|--------------|----------|------------------|------------------|-------|-----|-------------------------------------|-----------------------------------------------------------------------------------------|
| K.NSQEC(+57.02)STDSDHITIVVK.R          | Y    | 103.57 | 1919.8530 | 17     | 2.4 | 960.9324 | 2 | 20.77 | 1        | F1:12236 | 20210611-08_2021021-OK192A_815_5.3.236.mgff | 0            |              | 0        | 0                | 0                | 39    | 55  | Carbamidomethylation                | C5:Carbamido methylation:1000.00                                                        |
| Q(-17.03)VC(+57.02)PTMTDSYAR.E         | Y    | 98.74  | 1410.5908 | 12     | 1.7 | 706.3012 | 2 | 33.96 | 1        | F1:30498 | 20210611-08_2021021-OK192A_815_5.3.236.mgff | 0            |              | 0        | 0                | 0                | 1     | 12  | Carbamidomethylation                | Q1:Pyr o-glu from Q:1000.00; C3:Carbamido methylation:1000.00                           |
| K.RYVNNQPER.K                          | Y    | 90.62  | 1174.5842 | 9      | 1.9 | 588.2983 | 2 | 10.46 | 1        | F1:1648  | 20210611-08_2021021-OK192A_815_5.3.236.mgff | 0            |              | 0        | 0                | 0                | 56    | 64  |                                     |                                                                                         |
| R.YVNNQPER.K                           | Y    | 81.98  | 1018.4832 | 8      | 6.8 | 510.2504 | 2 | 11.28 | 1        | F1:2421  | 20210611-08_2021021-OK192A_815_5.3.236.mgff | 0            |              | 0        | 0                | 0                | 57    | 64  |                                     |                                                                                         |
| Q(-17.03)VC(+57.02)PTM(+15.99)TDSYAR.E | Y    | 77.47  | 1426.5857 | 12     | 2.8 | 714.2994 | 2 | 27.52 | 1        | F1:21864 | 20210611-08_2021021-OK192A_815_5.3.236.mgff | 0            |              | 0        | 0                | 0                | 1     | 12  | Carbamidomethylation; Oxidation (M) | Q1:Pyr o-glu from Q:1000.00; C3:Carbamido methylation:1000.00; M6:Oxidation (M):1000.00 |

total 5 peptides

V\_1278\_106\_Prohormone-4a

[back to list](#)



### Protein Coverage:

### Supporting Peptides:

**V\_CG13\_205\_Prohormone-4a**

[back to list](#)

### Protein Coverage:

### Supporting Peptides:

### P\_094D\_091\_Angiotensin-converting

[back to list](#)

### Protein Coverage:

### Supporting Peptides:

**P\_102D\_097\_Nucleobinding-2-like**

[back to list](#)

### Protein Coverage:

### Supporting Peptides:

[illegible]



| Peptide          | Uniq | -10lgP | Mass     | Length | ppm | m/z      | z | RT    | Fraction | Scan    | Source File                                | Area ebraeus | Area judaeus | #Feature | #Feature ebraeus | #Feature judaeus | Start | End | PTM | AScore | Found By |
|------------------|------|--------|----------|--------|-----|----------|---|-------|----------|---------|--------------------------------------------|--------------|--------------|----------|------------------|------------------|-------|-----|-----|--------|----------|
| DGGALTER.R       | N    | 70.06  | 817.3929 | 8      | 1.7 | 409.7029 | 2 | 14.28 | 1        | F1:5430 | 20210611-08_2021021-OK192A_815_5.3.236.mgf | 0            | 0            | 0        | 0                | 0                | 1     | 8   |     |        | PEAKS DB |
| total 4 peptides |      |        |          |        |     |          |   |       |          |         |                                            |              |              |          |                  |                  |       |     |     |        |          |

OK212\_J\_220\_Cerm03

back to list

| [Protein Coverage](#) | [Supporting Peptides](#) |

Protein Coverage:

1 EISHRR**TIDGG EAGVL**AGDRA **TNK**NAELQQG LCPT

Supporting Peptides:

| Peptide                  | Uniq | -10lgP | Mass      | Length | ppm | m/z      | z | RT    | Fraction | Scan     | Source File                                | Area ebraeus | Area judaeus | #Feature | #Feature ebraeus | #Feature judaeus | Start | End | PTM | AScore                | Found By |
|--------------------------|------|--------|-----------|--------|-----|----------|---|-------|----------|----------|--------------------------------------------|--------------|--------------|----------|------------------|------------------|-------|-----|-----|-----------------------|----------|
| R.TIDGGEAGVLAGDR.A       | N    | 131.45 | 1329.6525 | 14     | 2.4 | 665.8323 | 2 | 28.62 | 2        | F2:81183 | 20210611-09_2021021-OK160A_816_5.3.236.mgf | 0            | 0            | 0        | 0                | 0                | 6     | 19  |     |                       | PEAKS DB |
| R.TIDGGEAGVLAGDRATNK.N   | Y    | 129.48 | 1743.8751 | 18     | 0.2 | 872.9413 | 2 | 25.18 | 2        | F2:75165 | 20210611-09_2021021-OK160A_816_5.3.236.mgf |              | 0            | 0        | 0                | 0                | 6     | 23  |     |                       | PEAKS DB |
| R.TIDGGEAGVLAGDR(-.98).A | N    | 105.16 | 1328.6685 | 14     | 2.0 | 665.3400 | 2 | 27.71 | 2        | F2:79347 | 20210611-09_2021021-OK160A_816_5.3.236.mgf |              | 0            | 0        | 0                | 0                | 6     | 19  |     | R14:Amidation:1000.00 | PEAKS DB |
| total 3 peptides         |      |        |           |        |     |          |   |       |          |          |                                            |              |              |          |                  |                  |       |     |     |                       |          |

OK214\_J\_005\_B1

back to list

| [Protein Coverage](#) | [Supporting Peptides](#) |

Protein Coverage:

1 **DGGALTERS** **ADATALKPEP** **ILLQK**SAARS **TDDNGKDTLT** **QMK**RTLKKRG NTARGYEEDR EVAETVRELD EHGKR

Supporting Peptides:

| Peptide                    | Uniq | -10lgP | Mass      | Length | ppm  | m/z      | z | RT    | Fraction | Scan     | Source File                                | Area ebraeus | Area judaeus | #Feature | #Feature ebraeus | #Feature judaeus | Start | End | PTM | AScore                    | Found By |
|----------------------------|------|--------|-----------|--------|------|----------|---|-------|----------|----------|--------------------------------------------|--------------|--------------|----------|------------------|------------------|-------|-----|-----|---------------------------|----------|
| R.STDDNGKDTLTQMK.R         | N    | 120.13 | 1552.7039 | 14     | 0.7  | 777.3565 | 2 | 18.22 | 2        | F2:63522 | 20210611-09_2021021-OK160A_816_5.3.236.mgf |              | 0            | 0        | 0                | 0                | 30    | 43  |     |                           | PEAKS DB |
| R.SADATALKEPILLQK.S        | Y    | 104.64 | 1693.9614 | 16     | -0.9 | 847.9836 | 2 | 36.16 | 2        | F2:94489 | 20210611-09_2021021-OK160A_816_5.3.236.mgf |              | 0            | 0        | 0                | 0                | 10    | 25  |     |                           | PEAKS DB |
| R.STDDNGKDTLTQM(+15.99)K.R | N    | 91.87  | 1568.6989 | 14     | -0.9 | 785.3527 | 2 | 12.52 | 2        | F2:55548 | 20210611-09_2021021-OK160A_816_5.3.236.mgf |              | 0            | 0        | 0                | 0                | 30    | 43  |     | M13:Oxidation (M):1000.00 | PEAKS DB |
| DGGALTER.R                 | N    | 70.06  | 817.3929  | 8      | 1.7  | 409.7029 | 2 | 14.28 | 1        | F1:5430  | 20210611-08_2021021-OK192A_815_5.3.236.mgf | 0            | 0            | 0        | 0                | 0                | 1     | 8   |     |                           | PEAKS DB |
| total 4 peptides           |      |        |           |        |      |          |   |       |          |          |                                            |              |              |          |                  |                  |       |     |     |                           |          |

OK214\_J\_004\_B1

back to list

| [Protein Coverage](#) | [Supporting Peptides](#) |

Protein Coverage:

1 **DGGALTERS** **ADATALKPEP** **ILLQK**SAARS **TDDNGKDTLT** **QMK**RTLKKRG NVATDREBIL ETIRELNESG KR

Supporting Peptides:

| Peptide                    | Uniq | -10lgP | Mass      | Length | ppm  | m/z      | z | RT    | Fraction | Scan     | Source File                                | Area ebraeus | Area judaeus | #Feature | #Feature ebraeus | #Feature judaeus | Start | End | PTM | AScore                    | Found By |
|----------------------------|------|--------|-----------|--------|------|----------|---|-------|----------|----------|--------------------------------------------|--------------|--------------|----------|------------------|------------------|-------|-----|-----|---------------------------|----------|
| R.STDDNGKDTLTQMK.R         | N    | 120.13 | 1552.7039 | 14     | 0.7  | 777.3565 | 2 | 18.22 | 2        | F2:63522 | 20210611-09_2021021-OK160A_816_5.3.236.mgf |              | 0            | 0        | 0                | 0                | 30    | 43  |     |                           | PEAKS DB |
| R.SADATALKEPILLQK.S        | Y    | 104.64 | 1693.9614 | 16     | -0.9 | 847.9836 | 2 | 36.16 | 2        | F2:94489 | 20210611-09_2021021-OK160A_816_5.3.236.mgf |              | 0            | 0        | 0                | 0                | 10    | 25  |     |                           | PEAKS DB |
| R.STDDNGKDTLTQM(+15.99)K.R | N    | 91.87  | 1568.6989 | 14     | -0.9 | 785.3527 | 2 | 12.52 | 2        | F2:55548 | 20210611-09_2021021-OK160A_816_5.3.236.mgf |              | 0            | 0        | 0                | 0                | 30    | 43  |     | M13:Oxidation (M):1000.00 | PEAKS DB |
| DGGALTER.R                 | N    | 70.06  | 817.3929  | 8      | 1.7  | 409.7029 | 2 | 14.28 | 1        | F1:5430  | 20210611-08_2021021-OK192A_815_5.3.236.mgf | 0            | 0            | 0        | 0                | 0                | 1     | 8   |     |                           | PEAKS DB |
| total 4 peptides           |      |        |           |        |      |          |   |       |          |          |                                            |              |              |          |                  |                  |       |     |     |                           |          |

V\_1278\_048\_E-1

back to list

| [Protein Coverage](#) | [Supporting Peptides](#) |

Protein Coverage:

1 WPR**LNDWDCE** **LGR**NMHITCK **QLEQCGFIEK** KDGQLTCKLR CRCKPGKRCL RK**EKIDWSDI** **TTR**IYHCPWP Carbamidomethylation (+57.02)

Supporting Peptides:

| Peptide                        | Uniq | -10lgP | Mass      | Length | ppm  | m/z      | z | RT    | Fraction | Scan     | Source File                                | Area ebraeus | Area judaeus | #Feature | #Feature ebraeus | #Feature judaeus | Start | End | PTM                  | AScore                                                    | Found By |
|--------------------------------|------|--------|-----------|--------|------|----------|---|-------|----------|----------|--------------------------------------------|--------------|--------------|----------|------------------|------------------|-------|-----|----------------------|-----------------------------------------------------------|----------|
| K.EKIDWSDITTR.I                | Y    | 98.62  | 1362.6780 | 11     | 1.4  | 682.3446 | 2 | 34.31 | 1        | F1:30882 | 20210611-08_2021021-OK192A_815_5.3.236.mgf | 0            | 0            | 0        | 0                | 0                | 53    | 63  |                      |                                                           | PEAKS DB |
| K.QLEQC(+57.02)GFIEK.K         | Y    | 93.89  | 1250.5964 | 10     | 3.3  | 626.3052 | 2 | 27.67 | 1        | F1:22189 | 20210611-08_2021021-OK192A_815_5.3.236.mgf | 0            | 0            | 0        | 0                | 0                | 21    | 30  | Carbamidomethylation | C5:Carbamidomethylation:1000.00                           | PEAKS DB |
| K.Q(-17.03)LEQC(+57.02)GFIEK.K | Y    | 86.02  | 1233.5699 | 10     | -1.3 | 617.7891 | 2 | 39.10 | 1        | F1:36643 | 20210611-08_2021021-OK192A_815_5.3.236.mgf | 0            |              | 0        | 0                | 0                | 21    | 30  | Carbamidomethylation | Q1:Pyroglu from Q:1000.00;C5:Carbamidomethylation:1000.00 | PEAKS DB |
| K.IDWSDITTR.I                  | Y    | 79.29  | 1105.5404 | 9      | 0.1  | 553.7755 | 2 | 38.75 | 1        | F1:36423 | 20210611-08_2021021-OK192A_815_5.3.236.mgf | 0            | 0            | 0        | 0                | 0                | 55    | 63  |                      |                                                           | PEAKS DB |
| R.LNDWDC(+57.02)ELGR.N         | Y    | 75.44  | 1276.5507 | 10     | 1.6  | 639.2812 | 2 | 33.14 | 1        | F1:29308 | 20210611-08_2021021-OK192A_815_5.3.236.mgf | 0            |              | 0        | 0                | 0                | 4     | 13  | Carbamidomethylation | C6:Carbamidomethylation:1000.00                           | PEAKS DB |
| total 5 peptides               |      |        |           |        |      |          |   |       |          |          |                                            |              |              |          |                  |                  |       |     |                      |                                                           |          |

V.CG13\_066\_E-1

back to list

| [Protein Coverage](#) | [Supporting Peptides](#) |

Protein Coverage:

1 WPR**LNDWDCE** **LGR**NMHITCK **QLEQCGFIEK** KDGQLTCKLR CRCKPGKRCL RK**EKIDWSDI** **TTR**IYHCPWP Carbamidomethylation (+57.02)

Supporting Peptides:

| Peptide         | Uniq | -10lgP | Mass      | Length | ppm | m/z      | z | RT    | Fraction | Scan     | Source File                                | Area ebraeus | Area judaeus | #Feature | #Feature ebraeus | #Feature judaeus | Start | End | PTM | AScore | Found By |
|-----------------|------|--------|-----------|--------|-----|----------|---|-------|----------|----------|--------------------------------------------|--------------|--------------|----------|------------------|------------------|-------|-----|-----|--------|----------|
| K.EKIDWSDITTR.I | Y    | 98.62  | 1362.6780 | 11     | 1.4 | 682.3446 | 2 | 34.31 | 1        | F1:30882 | 20210611-08_2021021-OK192A_815_5.3.236.mgf | 0            | 0            | 0        | 0                | 0                | 53    | 63  |     |        | PEAKS DB |

total 5 peptides



**C** Carbamidomethylation (+57.02)

| Peptide                   | Uniq | -10lgP | Mass      | Length | ppm | m/z      | z | RT    | Fraction | Scan     | Source File                                | Area<br>ebraeus | Area<br>judaeus | #Feature | #Feature<br>ebraeus | #Feature<br>judaeus | Start | End | PTM                  | AScore                                          | Found<br>By |
|---------------------------|------|--------|-----------|--------|-----|----------|---|-------|----------|----------|--------------------------------------------|-----------------|-----------------|----------|---------------------|---------------------|-------|-----|----------------------|-------------------------------------------------|-------------|
| K.KVPTSDYNC(+57.02)QIHK.I | N    | 109.55 | 1588.7667 | 13     | 1.8 | 530.5949 | 3 | 16.58 | 2        | F2:60994 | 20210611-09_2021021-OK160A_816_5.3.236.mgf | 0               | 0               | 0        | 0                   | 0                   | 51    | 63  |                      | C9:Carb<br>amidome<br>thylatio<br>n:1000.0<br>0 | PEAKS<br>DB |
| K.VPTSDYNC(+57.02)QIHK.I  | N    | 103.68 | 1460.6718 | 12     | 1.1 | 487.8963 | 3 | 18.39 | 2        | F2:63597 | 20210611-09_2021021-OK160A_816_5.3.236.mgf | 0               | 0               | 0        | 0                   | 0                   | 52    | 63  | Carbamidomethylation | C8:Carb<br>amidome<br>thylatio<br>n:1000.0<br>0 | PEAKS<br>DB |
| K.IPNHC(+57.02)GGPVL      | Y    | 79.63  | 1062.5281 | 10     | 3.7 | 532.2711 | 2 | 26.38 | 2        | F2:77178 | 20210611-09_2021021-OK160A_816_5.3.236.mgf |                 | 0               | 0        | 0                   | 0                   | 64    | 73  |                      | C5:Carb<br>amidome<br>thylatio<br>n:1000.0<br>0 | PEAKS<br>DB |

**CebrOK035\_J\_308\_Pmag02**

[back to list](#)

### Protein Coverage:

c Carbamidomethylation (+57.02)

| Peptide                   | Uniq | -10lgP | Mass      | Length | ppm | m/z      | z | RT    | Fraction | Scan     | Source File                                | Area ebraeus | Area judaeus | #Feature | #Feature ebraeus | #Feature judaeus | Start | End | PTM                  | AScore                             | Found By |
|---------------------------|------|--------|-----------|--------|-----|----------|---|-------|----------|----------|--------------------------------------------|--------------|--------------|----------|------------------|------------------|-------|-----|----------------------|------------------------------------|----------|
| K.KVPTSDYNC(+57.02)QIHK.I | N    | 109.55 | 1588.7667 | 13     | 1.8 | 530.5949 | 3 | 16.58 | 2        | F2:60994 | 20210611-09_2021021-OK160A_816_5.3.236.mgf | 0            | 0            | 0        | 0                | 0                | 51    | 63  |                      | C9: Carbamidomethylation n:1000.00 | PEAKS DB |
| K.VPTSDYNC(+57.02)QIHK.I  | N    | 103.68 | 1460.6718 | 12     | 1.1 | 487.8963 | 3 | 18.39 | 2        | F2:63597 | 20210611-09_2021021-OK160A_816_5.3.236.mgf | 0            | 0            | 0        | 0                | 0                | 52    | 63  | Carbamidomethylation | C8: Carbamidomethylation n:1000.00 | PEAKS DB |
| K.IPNHC(+57.02)GGPVL      | Y    | 79.63  | 1062.5281 | 10     | 3.7 | 532.2711 | 2 | 26.38 | 2        | F2:77178 | 20210611-09_2021021-OK160A_816_5.3.236.mgf |              | 0            | 0        | 0                | 0                | 64    | 73  |                      | C5: Carbamidomethylation n:1000.00 | PEAKS DB |

**CebrOK033\_J\_219\_Pmag02**

[back to list](#)

### Protein Coverage:

**C** Carbamidomethylation (+57.02)

| Peptide                    | Uniq | -10lgP | Mass      | Length | ppm | m/z      | z | RT    | Fraction | Scan     | Source File                                | Area<br>ebraeus | Area<br>judaeus | #Feature | #Feature<br>ebraeus | #Feature<br>judaeus | Start | End | PTM                  | AScore                                           | Found<br>By |
|----------------------------|------|--------|-----------|--------|-----|----------|---|-------|----------|----------|--------------------------------------------|-----------------|-----------------|----------|---------------------|---------------------|-------|-----|----------------------|--------------------------------------------------|-------------|
| K.KVPTSDYINC(+57.02)QIHK.I | N    | 109.55 | 1588.7667 | 13     | 1.8 | 530.5949 | 3 | 16.58 | 2        | F2:60994 | 20210611-09_2021021-OK160A_816_5.3.236.mgf | 0               | 0               | 0        | 0                   | 0                   | 51    | 63  |                      | C9: Carb<br>amidome<br>thylatio<br>n:1000.0<br>0 | PEAKS<br>DB |
| K.VPTSDYINC(+57.02)QIHK.I  | N    | 103.68 | 1460.6718 | 12     | 1.1 | 487.8963 | 3 | 18.39 | 2        | F2:63597 | 20210611-09_2021021-OK160A_816_5.3.236.mgf | 0               | 0               | 0        | 0                   | 0                   | 52    | 63  | Carbamidomethylation | C8: Carb<br>amidome<br>thylatio<br>n:1000.0<br>0 | PEAKS<br>DB |
| K.IPNHC(+57.02)GGPVL       | Y    | 79.63  | 1062.5281 | 10     | 3.7 | 532.2711 | 2 | 26.38 | 2        | F2:77178 | 20210611-09_2021021-OK160A_816_5.3.236.mgf |                 | 0               | 0        | 0                   | 0                   | 64    | 73  |                      | C5: Carb<br>amidome<br>thylatio<br>n:1000.0<br>0 | PEAKS<br>DB |

OK214\_J\_271\_Pmag02

[back to list](#)

### Protein Coverage:

**C** Carbamidomethylation (+57.02)

| Peptide                   | Uniq | -10lgP | Mass      | Length | ppm | m/z      | z | RT    | Fraction | Scan     | Source File                                | Area ebraeus | Area judaeus | #Feature | #Feature ebraeus | #Feature judaeus | Start | End | PTM                  | AScore                              | Found By |
|---------------------------|------|--------|-----------|--------|-----|----------|---|-------|----------|----------|--------------------------------------------|--------------|--------------|----------|------------------|------------------|-------|-----|----------------------|-------------------------------------|----------|
| K.KVPTSDYNC(+57.02)QIHK.I | N    | 109.55 | 1588.7667 | 13     | 1.8 | 530.5949 | 3 | 16.58 | 2        | F2:60994 | 20210611-09_2021021-OK160A_816_5.3.236.mgf | 0            | 0            | 0        | 0                | 0                | 51    | 63  |                      | C9:Carb amidome thylatio n:1000.0 0 | PEAKS DB |
| K.VPTSDYNC(+57.02)QIHK.I  | N    | 103.68 | 1460.6718 | 12     | 1.1 | 487.8963 | 3 | 18.39 | 2        | F2:63597 | 20210611-09_2021021-OK160A_816_5.3.236.mgf | 0            | 0            | 0        | 0                | 0                | 52    | 63  | Carbamidomethylation | C8:Carb amidome thylatio n:1000.0 0 | PEAKS DB |
| K.IPNHC(+57.02)GGPVL      | Y    | 79.63  | 1062.5281 | 10     | 3.7 | 532.2711 | 2 | 26.38 | 2        | F2:77178 | 20210611-09_2021021-OK160A_816_5.3.236.mgf |              | 0            | 0        | 0                | 0                | 64    | 73  |                      | C5:Carb amidome thylatio n:1000.0 0 | PEAKS DB |

OK005\_J\_275\_Pmag02

[back to list](#)

### Protein Coverage:

c Carbamidomethylation (+57.02)

| Peptide | Uniq | -10lgP | Mass | Length | ppm | m/z | z | RT | Fraction | Scan | Source File | Area<br>ebraeus | Area<br>judaesus | #Feature | #Feature<br>ebraeus | #Feature<br>judaesus | Start | End | PTM | AScore | Found<br>By |
|---------|------|--------|------|--------|-----|-----|---|----|----------|------|-------------|-----------------|------------------|----------|---------------------|----------------------|-------|-----|-----|--------|-------------|
|---------|------|--------|------|--------|-----|-----|---|----|----------|------|-------------|-----------------|------------------|----------|---------------------|----------------------|-------|-----|-----|--------|-------------|

**total 3 peptides**

| Peptide                   | Uniq | -10lgP | Mass      | Length | ppm | m/z      | z | RT    | Fraction | Scan     | Source File                                | Area ebraeus | Area judaeus | #Feature | #Feature ebraeus | #Feature judaeus | Start | End | PTM                  | AScore                              | Found By |
|---------------------------|------|--------|-----------|--------|-----|----------|---|-------|----------|----------|--------------------------------------------|--------------|--------------|----------|------------------|------------------|-------|-----|----------------------|-------------------------------------|----------|
| K.KVPTSDYNC(+57.02)QIHK.I | N    | 109.55 | 1588.7667 | 13     | 1.8 | 530.5949 | 3 | 16.58 | 2        | F2:60994 | 20210611-09_2021021-OK160A_816_5.3.236.mgf | 0            | 0            | 0        | 0                | 0                | 51    | 63  |                      | C9:Carb amidome thylatio n:1000.0 0 | PEAKS DB |
| K.VPTSDYNC(+57.02)QIHK.I  | N    | 103.68 | 1460.6718 | 12     | 1.1 | 487.8963 | 3 | 18.39 | 2        | F2:63597 | 20210611-09_2021021-OK160A_816_5.3.236.mgf | 0            | 0            | 0        | 0                | 0                | 52    | 63  | Carbamidomethylation | C8:Carb amidome thylatio n:1000.0 0 | PEAKS DB |
| K.IPNHC(+57.02)GGPVL      | Y    | 79.63  | 1062.5281 | 10     | 3.7 | 532.2711 | 2 | 26.38 | 2        | F2:77178 | 20210611-09_2021021-OK160A_816_5.3.236.mgf |              | 0            | 0        | 0                | 0                | 64    | 73  |                      | C5:Carb amidome thylatio n:1000.0 0 | PEAKS DB |
| total 3 peptides          |      |        |           |        |     |          |   |       |          |          |                                            |              |              |          |                  |                  |       |     |                      |                                     |          |

OK212\_J\_264\_Pmag02

[| Protein Coverage](#) | [Supporting Peptides](#) |

Protein Coverage:

1

QFFCPDSEDD PLNCLETQAT AATCMKSTED ETYSIVCGYC GKKKETCFGK

59

C

KVPTSDYNCQ IHKIPNHCGG PVL

C

☒ Carbamidomethylation (+57.02)

Supporting Peptides:

| Peptide                   | Uniq | -10lgP | Mass      | Length | ppm | m/z      | z | RT    | Fraction | Scan     | Source File                                | Area ebraeus | Area judaeus | #Feature | #Feature ebraeus | #Feature judaeus | Start | End | PTM                  | AScore                              | Found By |
|---------------------------|------|--------|-----------|--------|-----|----------|---|-------|----------|----------|--------------------------------------------|--------------|--------------|----------|------------------|------------------|-------|-----|----------------------|-------------------------------------|----------|
| K.KVPTSDYNC(+57.02)QIHK.I | N    | 109.55 | 1588.7667 | 13     | 1.8 | 530.5949 | 3 | 16.58 | 2        | F2:60994 | 20210611-09_2021021-OK160A_816_5.3.236.mgf | 0            | 0            | 0        | 0                | 0                | 51    | 63  |                      | C9:Carb amidome thylatio n:1000.0 0 | PEAKS DB |
| K.VPTSDYNC(+57.02)QIHK.I  | N    | 103.68 | 1460.6718 | 12     | 1.1 | 487.8963 | 3 | 18.39 | 2        | F2:63597 | 20210611-09_2021021-OK160A_816_5.3.236.mgf | 0            | 0            | 0        | 0                | 0                | 52    | 63  | Carbamidomethylation | C8:Carb amidome thylatio n:1000.0 0 | PEAKS DB |
| K.IPNHC(+57.02)GGPVL      | Y    | 79.63  | 1062.5281 | 10     | 3.7 | 532.2711 | 2 | 26.38 | 2        | F2:77178 | 20210611-09_2021021-OK160A_816_5.3.236.mgf |              | 0            | 0        | 0                | 0                | 64    | 73  |                      | C5:Carb amidome thylatio n:1000.0 0 | PEAKS DB |
| total 3 peptides          |      |        |           |        |     |          |   |       |          |          |                                            |              |              |          |                  |                  |       |     |                      |                                     |          |

OK214\_J\_272\_Pmag02

[| Protein Coverage](#) | [Supporting Peptides](#) |

Protein Coverage:

1

QFFCPESENE PLNCLETQPN SATCMQSSDD QSYSIVCGYC GKKKETCFGK

59

C

KVPTSDYNCQ IHKIPNHCGG PVL

C

☒ Carbamidomethylation (+57.02)

Supporting Peptides:

| Peptide                   | Uniq | -10lgP | Mass      | Length | ppm | m/z      | z | RT    | Fraction | Scan     | Source File                                | Area ebraeus | Area judaeus | #Feature | #Feature ebraeus | #Feature judaeus | Start | End | PTM                  | AScore                              | Found By |
|---------------------------|------|--------|-----------|--------|-----|----------|---|-------|----------|----------|--------------------------------------------|--------------|--------------|----------|------------------|------------------|-------|-----|----------------------|-------------------------------------|----------|
| K.KVPTSDYNC(+57.02)QIHK.I | N    | 109.55 | 1588.7667 | 13     | 1.8 | 530.5949 | 3 | 16.58 | 2        | F2:60994 | 20210611-09_2021021-OK160A_816_5.3.236.mgf | 0            | 0            | 0        | 0                | 0                | 51    | 63  |                      | C9:Carb amidome thylatio n:1000.0 0 | PEAKS DB |
| K.VPTSDYNC(+57.02)QIHK.I  | N    | 103.68 | 1460.6718 | 12     | 1.1 | 487.8963 | 3 | 18.39 | 2        | F2:63597 | 20210611-09_2021021-OK160A_816_5.3.236.mgf | 0            | 0            | 0        | 0                | 0                | 52    | 63  | Carbamidomethylation | C8:Carb amidome thylatio n:1000.0 0 | PEAKS DB |
| K.IPNHC(+57.02)GGPVL      | Y    | 79.63  | 1062.5281 | 10     | 3.7 | 532.2711 | 2 | 26.38 | 2        | F2:77178 | 20210611-09_2021021-OK160A_816_5.3.236.mgf |              | 0            | 0        | 0                | 0                | 64    | 73  |                      | C5:Carb amidome thylatio n:1000.0 0 | PEAKS DB |
| total 3 peptides          |      |        |           |        |     |          |   |       |          |          |                                            |              |              |          |                  |                  |       |     |                      |                                     |          |

gene:107299479

[| Protein Coverage](#) | [Supporting Peptides](#) |

Protein Coverage:

1

MQIFVKLTG K

TITLEVEPS DTIENVK

AKI QDK

EGIPPDQ QR

LIFAGKQL EDGR

TLSDYN IQKESTLHLV LR

LRGGMQIF

81

VKTLTVSDYN IQKESTLHLV LRLRGGMQIF VKTLTGKTIT LEVEPSDTIE NVKAKIQDKE GIPPDQQR LI FAGKQLEDGR

161

TLSDYNIQKE STLHLVLR LR GGF

Supporting Peptides:

| Peptide              | Uniq | -10lgP | Mass      | Length | ppm  | m/z      | z | RT    | Fraction | Scan     | Source File                                | Area ebraeus | Area judaeus | #Feature | #Feature ebraeus | #Feature judaeus | Start | End | PTM | AScore | Found By |
|----------------------|------|--------|-----------|--------|------|----------|---|-------|----------|----------|--------------------------------------------|--------------|--------------|----------|------------------|------------------|-------|-----|-----|--------|----------|
| K.TITLEVEPSDTIENVK.A | Y    | 101.48 | 1786.9200 | 16     | -0.2 | 894.4637 | 2 | 41.99 | 1        | F1:39768 | 20210611-08_2021021-OK192A_815_5.3.236.mgf | 0            | 0            | 0        | 0                | 0                | 12    | 27  |     |        | PEAKS DB |
| K.ESTLHLVLR.L        | Y    | 87.22  | 1066.6135 | 9      | 2.6  | 534.3134 | 2 | 31.53 | 1        | F1:27196 | 20210611-08_2021021-OK192A_815_5.3.236.mgf | 0            | 0            | 0        | 0                | 0                | 64    | 72  |     |        | PEAKS DB |
| R.TLSDYNIQK.E        | Y    | 74.97  | 1080.5452 | 9      | 1.1  | 541.2782 | 2 | 23.62 | 2        | F2:72217 | 20210611-09_2021021-OK160A_816_5.3.236.mgf | 0            | 0            | 0        | 0                | 0                | 55    | 63  |     |        | PEAKS DB |
| K.EGIPPDQQR.L        | Y    | 63.07  | 1038.5094 | 9      | 3.0  | 520.2614 | 2 | 16.35 | 2        | F2:60614 | 20210611-09_2021021-OK160A_816_5.3.236.mgf | 0            | 0            | 0        | 0                | 0                | 34    | 42  |     |        | PEAKS DB |
| total 4 peptides     |      |        |           |        |      |          |   |       |          |          |                                            |              |              |          |                  |                  |       |     |     |        |          |

SRX1323887\_E\_190\_Ggeo01

[| Protein Coverage](#) | [Supporting Peptides](#) |

Protein Coverage:

1

FQADDSGLDK KSRPLSRAAR

DHANSDFFGK

LQAAELDRHR

RILTETPFNS PNANHCHK

MQ YF

Supporting Peptides:

| Peptide               | Uniq | -10lgP | Mass      | Length | ppm  | m/z      | z | RT    | Fraction | Scan     | Source File                                | Area ebraeus | Area judaeus | #Feature | #Feature ebraeus | #Feature judaeus | Start | End | PTM | AScore | Found By |
|-----------------------|------|--------|-----------|--------|------|----------|---|-------|----------|----------|--------------------------------------------|--------------|--------------|----------|------------------|------------------|-------|-----|-----|--------|----------|
| R.DHANSDFFGK.L        | N    | 108.55 | 1136.4886 | 10     | 2.5  | 569.2509 | 2 | 23.01 | 1        | F1:15072 | 20210611-08_2021021-OK192A_815_5.3.236.mgf | 0            |              | 0        | 0                | 0                | 21    | 30  |     |        | PEAKS DB |
| R.ILTETPFNSPNANHCHK.M | Y    | 107.56 | 1981.9646 | 17     | 0.8  | 661.6602 | 3 | 33.30 | 1        | F1:29581 | 20210611-08_2021021-OK192A_815_5.3.236.mgf | 0            |              | 0        | 0                | 0                | 42    | 58  |     |        | PEAKS DB |
| FQADDSGLDKK.L         | N    | 65.78  | 1222.5829 | 11     | -4.3 | 612.2938 | 2 | 17.28 | 1        | F1:8549  | 20210611-08_2021021-OK192A_815_5.3.236.mgf | 0            |              | 0        | 0                | 0                | 1     | 11  |     |        | PEAKS DB |
| total 3 peptides      |      |        |           |        |      |          |   |       |          |          |                                            |              |              |          |                  |                  |       |     |     |        |          |

CebrOK014\_E\_119\_Ggeo01

[| Protein Coverage](#) | [Supporting Peptides](#) |

Protein Coverage:

1

FQADDSGLDK KSRPLSRAAR

DHANSDFFGK

LQAAELDRHR

RILTETPFNS PNANHCHK

MF



Supporting Peptides:

| Peptide               | Uniq | -10lgP | Mass      | Length | ppm  | m/z      | z | RT    | Fraction | Scan     | Source File                                | Area ebraeus | Area judaeus | #Feature | #Feature ebraeus | #Feature judaeus | Start | End | PTM | AScore | Found By |
|-----------------------|------|--------|-----------|--------|------|----------|---|-------|----------|----------|--------------------------------------------|--------------|--------------|----------|------------------|------------------|-------|-----|-----|--------|----------|
| R.DHANSDFFGK.L        | N    | 108.55 | 1136.4886 | 10     | 2.5  | 569.2509 | 2 | 23.01 | 1        | F1:15072 | 20210611-08_2021021-OK192A_815_5.3.236.mgf | 0            |              | 0        | 0                | 0                | 21    | 30  |     |        | PEAKS DB |
| R.ILTETPFNSPNANHYHK.M | Y    | 107.56 | 1981.9646 | 17     | 0.8  | 661.6602 | 3 | 33.30 | 1        | F1:29581 | 20210611-08_2021021-OK192A_815_5.3.236.mgf | 0            |              | 0        | 0                | 0                | 42    | 58  |     |        | PEAKS DB |
| FQADDSGLDKK.S         | N    | 65.78  | 1222.5829 | 11     | -4.3 | 612.2938 | 2 | 17.28 | 1        | F1:8549  | 20210611-08_2021021-OK192A_815_5.3.236.mgf | 0            |              | 0        | 0                | 0                | 1     | 11  |     |        | PEAKS DB |
| total 3 peptides      |      |        |           |        |      |          |   |       |          |          |                                            |              |              |          |                  |                  |       |     |     |        |          |

OK005\_J\_264\_Ggeo01

[back to list](#)

| [Protein Coverage](#) | [Supporting Peptides](#) |

Protein Coverage:

1 FQADDSGLDK KSRPLSRAAR DHANSDFFGK LQAAELDRHR RILTETPFNS PNANHYHKVQ HF

Supporting Peptides:

| Peptide               | Uniq | -10lgP | Mass      | Length | ppm  | m/z      | z | RT    | Fraction | Scan     | Source File                                | Area ebraeus | Area judaeus | #Feature | #Feature ebraeus | #Feature judaeus | Start | End | PTM | AScore | Found By |
|-----------------------|------|--------|-----------|--------|------|----------|---|-------|----------|----------|--------------------------------------------|--------------|--------------|----------|------------------|------------------|-------|-----|-----|--------|----------|
| R.DHANSDFFGK.L        | N    | 108.55 | 1136.4886 | 10     | 2.5  | 569.2509 | 2 | 23.01 | 1        | F1:15072 | 20210611-08_2021021-OK192A_815_5.3.236.mgf | 0            |              | 0        | 0                | 0                | 21    | 30  |     |        | PEAKS DB |
| R.ILTETPFNSPNANHYHK.V | Y    | 107.56 | 1981.9646 | 17     | 0.8  | 661.6602 | 3 | 33.30 | 1        | F1:29581 | 20210611-08_2021021-OK192A_815_5.3.236.mgf | 0            |              | 0        | 0                | 0                | 42    | 58  |     |        | PEAKS DB |
| FQADDSGLDKK.S         | N    | 65.78  | 1222.5829 | 11     | -4.3 | 612.2938 | 2 | 17.28 | 1        | F1:8549  | 20210611-08_2021021-OK192A_815_5.3.236.mgf | 0            |              | 0        | 0                | 0                | 1     | 11  |     |        | PEAKS DB |
| total 3 peptides      |      |        |           |        |      |          |   |       |          |          |                                            |              |              |          |                  |                  |       |     |     |        |          |

OK213\_E\_251\_Ggeo01

[back to list](#)

| [Protein Coverage](#) | [Supporting Peptides](#) |

Protein Coverage:

1 FQADDSGLDK KSRPLSRAAR DHANSDFFGK LQAAELDRHR RILTETPFNS PNANHYHKVQ HF

Supporting Peptides:

| Peptide               | Uniq | -10lgP | Mass      | Length | ppm  | m/z      | z | RT    | Fraction | Scan     | Source File                                | Area ebraeus | Area judaeus | #Feature | #Feature ebraeus | #Feature judaeus | Start | End | PTM | AScore | Found By |
|-----------------------|------|--------|-----------|--------|------|----------|---|-------|----------|----------|--------------------------------------------|--------------|--------------|----------|------------------|------------------|-------|-----|-----|--------|----------|
| R.DHANSDFFGK.L        | N    | 108.55 | 1136.4886 | 10     | 2.5  | 569.2509 | 2 | 23.01 | 1        | F1:15072 | 20210611-08_2021021-OK192A_815_5.3.236.mgf | 0            |              | 0        | 0                | 0                | 21    | 30  |     |        | PEAKS DB |
| R.ILTETPFNSPNANHYHK.V | Y    | 107.56 | 1981.9646 | 17     | 0.8  | 661.6602 | 3 | 33.30 | 1        | F1:29581 | 20210611-08_2021021-OK192A_815_5.3.236.mgf | 0            |              | 0        | 0                | 0                | 42    | 58  |     |        | PEAKS DB |
| FQADDSGLDKK.S         | N    | 65.78  | 1222.5829 | 11     | -4.3 | 612.2938 | 2 | 17.28 | 1        | F1:8549  | 20210611-08_2021021-OK192A_815_5.3.236.mgf | 0            |              | 0        | 0                | 0                | 1     | 11  |     |        | PEAKS DB |
| total 3 peptides      |      |        |           |        |      |          |   |       |          |          |                                            |              |              |          |                  |                  |       |     |     |        |          |

P\_022\_Coagulation

[back to list](#)

| [Protein Coverage](#) | [Supporting Peptides](#) |

Protein Coverage:

1 MMLLLSVTLT LLVIASTNAD SPPGVPPHQQ QRQQQFDQQQ MNVQEGHGA GSKLKFQSEI HNADHIEHL QDVIKTKPKD # Oxidation (M) (+15.99)

81 QMSEEELEFH YFKMHDYDNN NKLDGVEIGK ALTHFHDDDH DANKPETGDS SSSSTSPPAD NQKSTQGSSS HSGGNDPDRV

161 SGGEDVEIVT DEKLAEVLDS ILELLDWDND GYVEYFELKV AQFKSKDKE

Supporting Peptides:

| Peptide                       | Uniq | -10lgP | Mass      | Length | ppm  | m/z      | z | RT    | Fraction | Scan     | Source File                                | Area ebraeus | Area judaeus | #Feature | #Feature ebraeus | #Feature judaeus | Start | End | PTM           | AScore                    | Found By |
|-------------------------------|------|--------|-----------|--------|------|----------|---|-------|----------|----------|--------------------------------------------|--------------|--------------|----------|------------------|------------------|-------|-----|---------------|---------------------------|----------|
| K.M(+15.99)HDYDNNNKLDGVEIGK.A | Y    | 112.80 | 1976.8898 | 17     | 1.9  | 659.9690 | 3 | 24.30 | 2        | F2:73307 | 20210611-09_2021021-OK160A_816_5.3.236.mgf | 0            | 0            | 0        | 0                | 0                | 94    | 110 | Oxidation (M) | M1:Oxidation (M):100.0.00 | PEAKS DB |
| K.DQMSEEELEFHYFK.M            | Y    | 98.80  | 1830.7770 | 14     | -1.4 | 916.3910 | 2 | 42.39 | 1        | F1:40251 | 20210611-08_2021021-OK192A_815_5.3.236.mgf | 0            |              | 0        | 0                | 0                | 80    | 93  |               |                           | PEAKS DB |
| K.DQM(+15.99)SEEELEFHYFK.M    | Y    | 83.64  | 1846.7720 | 14     | -1.7 | 616.5945 | 3 | 39.39 | 1        | F1:37083 | 20210611-08_2021021-OK192A_815_5.3.236.mgf | 0            |              | 0        | 0                | 0                | 80    | 93  | Oxidation (M) | M3:Oxidation (M):100.0.00 | PEAKS DB |
| K.LDGVGK.A                    | Y    | 65.43  | 829.4545  | 8      | 0.5  | 415.7332 | 2 | 25.02 | 1        | F1:18355 | 20210611-08_2021021-OK192A_815_5.3.236.mgf | 0            | 0            | 0        | 0                | 0                | 103   | 110 |               |                           | PEAKS DB |
| total 4 peptides              |      |        |           |        |      |          |   |       |          |          |                                            |              |              |          |                  |                  |       |     |               |                           |          |

D\_059\_Immunoglobulin-like

[back to list](#)

| [Protein Coverage](#) | [Supporting Peptides](#) |

Protein Coverage:

1 ETTPGGESEK SDTVSPKVSP RPPAVITPEL VTVVDGDNVT YICNASCTVN DKVSFKWFRN GAEISDAKEQ KYTFVASLKD # Carbamidomethylation (+57.02)

81 NINKFSCMAE STLGVESGKS DNVSPKVRPQ PPTITPELVK VVDGENVTYT CNTSYTGNDK VSFKWFKNGD GIPDAKEQKY

161 TFFVSSLKDNK NKFSCMIETT PGGESEKSDN VSPKVRTRPP NVITSETTVV VDGDNVTYIC NTSYICDDKV TFKWFKNGAE

241 LSDVKGQKYT FVSSLKDNKN KFSCLIIITP GGESEESDNV CLEVRPRPPT IIEIVTVVD GDNVSPKVR PQPPTVITPEL

321 VTVVDGENVT YTCNTSYTVN DKVSFKWFEN GARIPDAKEQ IYTFVSSLKD NKFSCMIET A

Supporting Peptides:

| Peptide                     | Uniq | -10lgP | Mass      | Length | ppm  | m/z      | z | RT    | Fraction | Scan     | Source File                                | Area ebraeus | Area judaeus | #Feature | #Feature ebraeus | #Feature judaeus | Start | End | PTM                  | AScore                          | Found By |
|-----------------------------|------|--------|-----------|--------|------|----------|---|-------|----------|----------|--------------------------------------------|--------------|--------------|----------|------------------|------------------|-------|-----|----------------------|---------------------------------|----------|
| K.FSC(+57.02)MIETTPGGESEK.S | Y    | 113.87 | 1671.7120 | 15     | -1.0 | 836.8589 | 2 | 30.27 | 2        | F2:83755 | 20210611-09_2021021-OK160A_816_5.3.236.mgf | 0            | 0            | 0        | 0                | 0                | 173   | 187 | Carbamidomethylation | C3:Carbamidomethylation:1000.00 | PEAKS DB |
| R.NGAEISDAKEQK.Y            | Y    | 86.20  | 1288.6259 | 12     | 1.1  | 645.3182 | 2 | 10.99 | 2        | F2:54000 | 20210611-09_2021021-OK160A_816_5.3.236.mgf |              | 0            | 0        | 0                | 0                | 60    | 71  |                      |                                 | PEAKS DB |
| K.YTFVSSLK.D                | Y    | 79.17  | 943.5015  | 8      | 4.0  | 472.7579 | 2 | 32.82 | 2        | F2:88168 | 20210611-09_2021021-OK160A_816_5.3.236.mgf | 0            | 0            | 0        | 0                | 0                | 160   | 167 |                      |                                 | PEAKS DB |
| total 3 peptides            |      |        |           |        |      |          |   |       |          |          |                                            |              |              |          |                  |                  |       |     |                      |                                 |          |

OK214\_J\_329\_PPI

[back to list](#)

| [Protein Coverage](#) | [Supporting Peptides](#) |

Protein Coverage:

1 MLVCGAIVFL LVQGFADFADK AKGPKVTDKV FFDIEIGGEK AGRIVIGLFGK TTVPKTAENF KKLAEGYEES GETLTYK GSK

81 FHRVIKEFMI QGGDFTRGDG TGGRSIYGEK FADENFKLQH YGPGWLSMAN AGKDINGSQF FITTKKTPWL DGRHVVFPGKV

161 LEGMKVVRKI EGTRTGDRDK PVKDVVIVDS GSLPVDPEFS VSKDPVSEEN

Supporting Peptides:

| Peptide            | Uniq | -10lgP | Mass      | Length | ppm  | m/z      | z | RT    | Fraction | Scan      | Source File                                | Area ebraeus | Area judaeus | #Feature | #Feature ebraeus | #Feature judaeus | Start | End | PTM | AScore | Found By |
|--------------------|------|--------|-----------|--------|------|----------|---|-------|----------|-----------|--------------------------------------------|--------------|--------------|----------|------------------|------------------|-------|-----|-----|--------|----------|
| K.LAEGYEESETLTYK.G | Y    | 106.39 | 1688.7781 | 15     | -0.1 | 845.3927 | 2 | 30.74 | 2        | F2:84640  | 20210611-09_2021021-OK160A_816_5.3.236.mgf |              | 0            | 0        | 0                | 0                | 63    | 77  |     |        | PEAKS DB |
| K.DTNGSQFFITTK.K   | N    | 100.10 | 1357.6514 | 12     | -0.1 | 679.8300 | 2 | 36.35 | 2        | F2:94879  | 20210611-09_2021021-OK160A_816_5.3.236.mgf |              | 0            | 0        | 0                | 0                | 134   | 145 |     |        | PEAKS DB |
| R.IVIGLFGK.T       | N    | 64.69  | 845.5374  | 8      | -0.9 | 423.7738 | 2 | 44.37 | 2        | F2:109266 | 20210611-09_2021021-OK160A_816_5.3.236.mgf |              | 0            | 0        | 0                | 0                | 44    | 51  |     |        | PEAKS DB |
| total 3 peptides   |      |        |           |        |      |          |   |       |          |           |                                            |              |              |          |                  |                  |       |     |     |        |          |

OK212\_J\_316\_PPI

[back to list](#)

| [Protein Coverage](#) | [Supporting Peptides](#) |

Protein Coverage:

1 MLVCGAIVFL LVQGFAFADK AKGPKVTDKV FFDIEIGGEK AGR**IVIGLFG K**TVPKTAENF KK**LAEGYEESETLTYK**GSK

81 FHRVIKEFMI QGGDFTRGDG TGGRSIYGEK FADENFKLQH YGPGWLSMAN AGK**DTNGSQF FITTK**KTPWL DGRHVVFGEV

161 LEGMKVVRKI EGTRTGDRDK PVKDVVIVDS GSLPVDPEFS VSKDPVSEEN

Supporting Peptides:

| Peptide            | Uniq | -10lgP | Mass      | Length | ppm  | m/z      | z | RT    | Fraction | Scan      | Source File                                | Area ebraeus | Area judaeus | #Feature | #Feature ebraeus | #Feature judaeus | Start | End | PTM | AScore | Found By |
|--------------------|------|--------|-----------|--------|------|----------|---|-------|----------|-----------|--------------------------------------------|--------------|--------------|----------|------------------|------------------|-------|-----|-----|--------|----------|
| K.LAEGYEESETLTYK.G | Y    | 106.39 | 1688.7781 | 15     | -0.1 | 845.3927 | 2 | 30.74 | 2        | F2:84640  | 20210611-09_2021021-OK160A_816_5.3.236.mgf |              | 0            | 0        | 0                | 0                | 63    | 77  |     |        | PEAKS DB |
| K.DTNGSQFFITTK.K   | N    | 100.10 | 1357.6514 | 12     | -0.1 | 679.8300 | 2 | 36.35 | 2        | F2:94879  | 20210611-09_2021021-OK160A_816_5.3.236.mgf |              | 0            | 0        | 0                | 0                | 134   | 145 |     |        | PEAKS DB |
| R.IVIGLFGK.T       | N    | 64.69  | 845.5374  | 8      | -0.9 | 423.7738 | 2 | 44.37 | 2        | F2:109266 | 20210611-09_2021021-OK160A_816_5.3.236.mgf |              | 0            | 0        | 0                | 0                | 44    | 51  |     |        | PEAKS DB |
| total 3 peptides   |      |        |           |        |      |          |   |       |          |           |                                            |              |              |          |                  |                  |       |     |     |        |          |

SRX1323887\_E\_191\_Ggeo01

[back to list](#)

| [Protein Coverage](#) | [Supporting Peptides](#) |

Protein Coverage:

1 **FQADDSGLDK K**SRPLSRAAR **DHANSDFFGK** LQAELDRHR **RFLDAAFYN PHANHLHK**ML LFQTTSQRSQ F

Supporting Peptides:

| Peptide               | Uniq | -10lgP | Mass      | Length | ppm  | m/z      | z | RT    | Fraction | Scan     | Source File                                | Area ebraeus | Area judaeus | #Feature | #Feature ebraeus | #Feature judaeus | Start | End | PTM | AScore | Found By |
|-----------------------|------|--------|-----------|--------|------|----------|---|-------|----------|----------|--------------------------------------------|--------------|--------------|----------|------------------|------------------|-------|-----|-----|--------|----------|
| R.DHANSDFFGK.L        | N    | 108.55 | 1136.4886 | 10     | 2.5  | 569.2509 | 2 | 23.01 | 1        | F1:15072 | 20210611-08_2021021-OK192A_815_5.3.236.mgf | 0            |              | 0        | 0                | 0                | 21    | 30  |     |        | PEAKS DB |
| R.FLLDAAFYNPHANHLHK.M | Y    | 88.49  | 2007.0115 | 17     | -0.6 | 670.0082 | 3 | 46.57 | 1        | F1:44806 | 20210611-08_2021021-OK192A_815_5.3.236.mgf | 0            |              | 0        | 0                | 0                | 42    | 58  |     |        | PEAKS DB |
| FQADDSGLDKK.S         | N    | 65.78  | 1222.5829 | 11     | -4.3 | 612.2938 | 2 | 17.28 | 1        | F1:8549  | 20210611-09_2021021-OK192A_815_5.3.236.mgf | 0            |              | 0        | 0                | 0                | 1     | 11  |     |        | PEAKS DB |
| total 3 peptides      |      |        |           |        |      |          |   |       |          |          |                                            |              |              |          |                  |                  |       |     |     |        |          |

OK193\_E\_234\_Tand01

[back to list](#)

| [Protein Coverage](#) | [Supporting Peptides](#) |

Protein Coverage:

1 TPDVLCITPV GQLSELCTTI GGTCAEYYHW KGKNNCSRFC ECDVGACPT DEAHAIVRGT VR**RPLTHYTC EPITEFPKCE**

81 **VDDVAIVNSG PGLR**RVVKCI CPWKYMYDGN SSHICKD

Supporting Peptides:

| Peptide                      | Uniq | -10lgP | Mass      | Length | ppm  | m/z      | z | RT    | Fraction | Scan     | Source File                                | Area ebraeus | Area judaeus | #Feature | #Feature ebraeus | #Feature judaeus | Start | End | PTM | AScore                           | Found By |
|------------------------------|------|--------|-----------|--------|------|----------|---|-------|----------|----------|--------------------------------------------|--------------|--------------|----------|------------------|------------------|-------|-----|-----|----------------------------------|----------|
| K.C(+57.02)EVDDVAIVNSGPGRL.R | Y    | 129.32 | 1699.8199 | 16     | 2.6  | 850.9163 | 2 | 37.78 | 1        | F1:35162 | 20210611-08_2021021-OK192A_815_5.3.236.mgf | 0            |              | 0        | 0                | 0                | 79    | 94  |     | C1:Carbamidomethylation:100 0.00 | PEAKS DB |
| K.RPLTHYTC(+57.02)EPITEFPK.C | Y    | 86.41  | 1987.9825 | 16     | -1.1 | 663.6649 | 3 | 31.42 | 1        | F1:27186 | 20210611-08_2021021-OK192A_815_5.3.236.mgf | 0            |              | 0        | 0                | 0                | 63    | 78  |     | C8:Carbamidomethylation:100 0.00 | PEAKS DB |
| total 2 peptides             |      |        |           |        |      |          |   |       |          |          |                                            |              |              |          |                  |                  |       |     |     |                                  |          |

OK213\_E\_278\_Tand01

[back to list](#)

| [Protein Coverage](#) | [Supporting Peptides](#) |

Protein Coverage:

1 TPDVLCITPV GQLSELCTTI GGTCAEYYHW KGKNNCSRFC ECDVGACPT DEAHAIVRGT VR**RPLTHYTC EPITEFPKCE**

81 **VDDVAIVNSG PGLR**RVVKCI CPWKYMYDGN SSHICKD

Supporting Peptides:

| Peptide                      | Uniq | -10lgP | Mass      | Length | ppm  | m/z      | z | RT    | Fraction | Scan     | Source File                                | Area ebraeus | Area judaeus | #Feature | #Feature ebraeus | #Feature judaeus | Start | End | PTM | AScore                           | Found By |
|------------------------------|------|--------|-----------|--------|------|----------|---|-------|----------|----------|--------------------------------------------|--------------|--------------|----------|------------------|------------------|-------|-----|-----|----------------------------------|----------|
| K.C(+57.02)EVDDVAIVNSGPGRL.R | Y    | 129.32 | 1699.8199 | 16     | 2.6  | 850.9163 | 2 | 37.78 | 1        | F1:35162 | 20210611-08_2021021-OK192A_815_5.3.236.mgf | 0            |              | 0        | 0                | 0                | 79    | 94  |     | C1:Carbamidomethylation:100 0.00 | PEAKS DB |
| K.RPLTHYTC(+57.02)EPITEFPK.C | Y    | 86.41  | 1987.9825 | 16     | -1.1 | 663.6649 | 3 | 31.42 | 1        | F1:27186 | 20210611-08_2021021-OK192A_815_5.3.236.mgf | 0            |              | 0        | 0                | 0                | 63    | 78  |     | C8:Carbamidomethylation:100 0.00 | PEAKS DB |
| total 2 peptides             |      |        |           |        |      |          |   |       |          |          |                                            |              |              |          |                  |                  |       |     |     |                                  |          |

OK006\_E\_260\_Tand01

[back to list](#)

| [Protein Coverage](#) | [Supporting Peptides](#) |

Protein Coverage:

1 TPDVLCITPV GQLSELCTTI GGTCAEYYHW KGKNNCSRFC ECDVGACPT DEAHAIVRGT VR**RPLTHYTC EPITEFPKCE**

81 **VDDVAIVNSG PGLR**RVVKCI CPWKYMYDGN SSHICKD

Supporting Peptides:

| Peptide                      | Uniq | -10lgP | Mass      | Length | ppm  | m/z      | z | RT    | Fraction | Scan     | Source File                                | Area ebraeus | Area judaeus | #Feature | #Feature ebraeus | #Feature judaeus | Start | End | PTM | AScore                           | Found By |
|------------------------------|------|--------|-----------|--------|------|----------|---|-------|----------|----------|--------------------------------------------|--------------|--------------|----------|------------------|------------------|-------|-----|-----|----------------------------------|----------|
| K.C(+57.02)EVDDVAIVNSGPGRL.R | Y    | 129.32 | 1699.8199 | 16     | 2.6  | 850.9163 | 2 | 37.78 | 1        | F1:35162 | 20210611-08_2021021-OK192A_815_5.3.236.mgf | 0            |              | 0        | 0                | 0                | 79    | 94  |     | C1:Carbamidomethylation:100 0.00 | PEAKS DB |
| K.RPLTHYTC(+57.02)EPITEFPK.C | Y    | 86.41  | 1987.9825 | 16     | -1.1 | 663.6649 | 3 | 31.42 | 1        | F1:27186 | 20210611-08_2021021-OK192A_815_5.3.236.mgf | 0            |              | 0        | 0                | 0                | 63    | 78  |     | C8:Carbamidomethylation:100 0.00 | PEAKS DB |
| total 2 peptides             |      |        |           |        |      |          |   |       |          |          |                                            |              |              |          |                  |                  |       |     |     |                                  |          |

SRX1323887\_E\_217\_Tand01

[back to list](#)

| [Protein Coverage](#) | [Supporting Peptides](#) |

Protein Coverage:

1   TPDVLCTIPGV QQLSELCTTI GGTCAEYYHW KGKNNCSRFC ECDVGVCAPT DEAHAIVRGT VK**RPLTHYTC EPITEFPKCE**

81   **VDDVAIVNSG PGLR**RVVKCI CPWKYMYDGN SSHICKD

Supporting Peptides:

| Peptide                      | Uniq | -10lgP | Mass      | Length | ppm  | m/z      | z | RT    | Fraction | Scan     | Source File                                | Area ebraeus | Area judaeus | #Feature | #Feature ebraeus | #Feature judaeus | Start | End | PTM | AScore                           | Found By |
|------------------------------|------|--------|-----------|--------|------|----------|---|-------|----------|----------|--------------------------------------------|--------------|--------------|----------|------------------|------------------|-------|-----|-----|----------------------------------|----------|
| K.C(+57.02)EVDDVAIVNSGPGLR.R | Y    | 129.32 | 1699.8199 | 16     | 2.6  | 850.9163 | 2 | 37.78 | 1        | F1:35162 | 20210611-08_2021021-OK192A_815_5.3.236.mgf | 0            |              | 0        | 0                | 0                | 79    | 94  |     | C1:Carbamidomethylation:100 0.00 | PEAKS DB |
| K.RPLTHYTC(+57.02)EPITEFPK.C | Y    | 86.41  | 1987.9825 | 16     | -1.1 | 663.6649 | 3 | 31.42 | 1        | F1:27186 | 20210611-08_2021021-OK192A_815_5.3.236.mgf | 0            |              | 0        | 0                | 0                | 63    | 78  |     | C8:Carbamidomethylation:100 0.00 | PEAKS DB |
| total 2 peptides             |      |        |           |        |      |          |   |       |          |          |                                            |              |              |          |                  |                  |       |     |     |                                  |          |

P\_079D\_079\_Metallopeptidase

[back to list](#)

| [Protein Coverage](#) | [Supporting Peptides](#) |

Protein Coverage:

1   QGLGMQPWMS LGQSAPPSYD MEAMLVKLAY TGITPFFRVL VDADARNNTK QIVWINPGML GISRQYLVLG RTSLEVITYK

81   KWCYDMVVNV LGLQPSRALN RSVSEAVDFE VKLADIYPRS LRASAVASGN HKTEVLSQMD AVYPNFNWAK YLKLFFQMSQ

161   VKLPFDLNVS VHHEFVQNLT AVIAQTDKRV**V LANYLLMR**VV RSSYSYLSKE IR**DLDIPMR**T ALFGMNQSLI HWQSCVTFLT

241   KVMNNAVGS M YVTHHFS PQS KQKATEVVEF IRDAMQEIIR QSRWIDNATK AKALEKSEKL QANVGYPENL LNKTYLEAMY

321   R**NVVFDPK**AL YKNVMQVHFL STSGNAKALL SPAPPRQOWI VSAADV NAYY DSTSNVMFCP AAMLQPPYFG DKFPMSMVFG

401   AIGMVISHEL THAFDDQGRK FDEEGNKASW WTEASKLKFD QQAQCFVNQF NEIVYAGHRI NGNATLSENI ADNGGVKIAF

481   RAFKKWQAQK GPEPQLPNL SFTPDQLFFI SLSQMWCNVI TNQQA**KASVL TFDHSPNNIR** ANMVMNTSMN FSQAFNCPAG

561   SKMNPADKCQ LW

Supporting Peptides:

| Peptide             | Uniq | -10lgP | Mass      | Length | ppm  | m/z      | z | RT    | Fraction | Scan      | Source File                                | Area ebraeus | Area judaeus | #Feature | #Feature ebraeus | #Feature judaeus | Start | End | PTM | AScore | Found By |
|---------------------|------|--------|-----------|--------|------|----------|---|-------|----------|-----------|--------------------------------------------|--------------|--------------|----------|------------------|------------------|-------|-----|-----|--------|----------|
| K.ASVLTFDHSPPNNIR.A | Y    | 99.19  | 1569.7899 | 14     | 0.7  | 524.2687 | 3 | 31.24 | 2        | F2:85466  | 20210611-09_2021021-OK160A_816_5.3.236.mgf | 0            | 0            | 0        | 0                | 0                | 527   | 540 |     |        | PEAKS DB |
| R.VLANYLLMR.V       | Y    | 75.54  | 1091.6161 | 9      | -2.6 | 546.8116 | 2 | 43.61 | 2        | F2:107761 | 20210611-09_2021021-OK160A_816_5.3.236.mgf |              | 0            | 0        | 0                | 0                | 190   | 198 |     |        | PEAKS DB |
| R.NVVFDPK.A         | Y    | 62.29  | 817.4333  | 7      | 1.6  | 409.7229 | 2 | 24.35 | 2        | F2:73455  | 20210611-09_2021021-OK160A_816_5.3.236.mgf |              | 0            | 0        | 0                | 0                | 322   | 328 |     |        | PEAKS DB |
| R.DLDIPMR.T         | Y    | 58.90  | 858.4269  | 7      | 2.4  | 430.2200 | 2 | 34.75 | 2        | F2:92035  | 20210611-09_2021021-OK160A_816_5.3.236.mgf |              | 0            | 0        | 0                | 0                | 213   | 219 |     |        | PEAKS DB |
| total 4 peptides    |      |        |           |        |      |          |   |       |          |           |                                            |              |              |          |                  |                  |       |     |     |        |          |

gene:107297064

[back to list](#)

| [Protein Coverage](#) | [Supporting Peptides](#) |

Protein Coverage:

1   **MVNFTVDQIR** AIMDKKANIR **NMSVIAHVDH GK**STLTDSLVS CKAGIIASSR AGETRFTDTR KDEQERCITI KSTAISLFYE

81   LSENDLAFIK QSKDGCGLI NLIDSPGHVD FSSEVTAALR VTDGALVVVD CVSGVCVQTE TVLRQAIAR IKPVLMMNKM

161   DRALLELQLQ PEELYQTFQR IVENNVNIIS TYGEGETGPM GNIMIDPVLG TVGFGSGLHG WAFTLKQFAE MYVAKFAAKG

241   EGQLNCNERA KKVDDMMKKL WGDYRFDPAT GKFSKSATSP EGKKLPRTFC QLILDPIFKV FDAIMNFKKE ETAKLIEKLD

321   IKLDSDEKKG EGKPLLVQRQ NGHPGIKNCD PKGPLMMYIS K MVP TSDKGR FYAFGRVFSG VVSTGLKCRI MGPNYTPGKK

401   EDLYLKPIQR TILMMGRYTE PIEDVPCGNI VGLVGVDQFL VKTGTTTTFE HAHNMVMK**F SVSPVVR**VAV EAKNPADLPK

481   LVEGLKRLAK SDPMVQCIIE ESGEHIIAGA GELHLEICKL DLEEDHACIP IKKSDPVVSY RETVSEESGT LCLSKSPNKH

561   NRLYMKARP F PDGLAEDIDK GDVSSRQELK QRARYLAEKY EWDVTEARKI WCFGPDGTGP NILTDITKGV QYLNEIKDSV

641   VAGFQWATKE GALCEENLRG VRFDVHDVTL HADAIHRGGG QIIPTARRCL YACMLTAQPR LMEPIYLV EI QCPEQVVGGI

721   YGVLNRRRGH VFEESQVAGT PMFVVK**KAYLP VNESFGFTAD LR**NTGGQAF PQCVFDHWQI LPGDPFDNTT RPCQVVIETR

801   KRGKLGEGIP ALDNFLDKL

Supporting Peptides:

| Peptide              | Uniq | -10lgP | Mass      | Length | ppm | m/z      | z | RT    | Fraction | Scan      | Source File                                | Area ebraeus | Area judaeus | #Feature | #Feature ebraeus | #Feature judaeus | Start | End | PTM | AScore | Found By |
|----------------------|------|--------|-----------|--------|-----|----------|---|-------|----------|-----------|--------------------------------------------|--------------|--------------|----------|------------------|------------------|-------|-----|-----|--------|----------|
| K.AYLPVNESFGFTADLR.S | Y    | 99.31  | 1798.8889 | 16     | 0.0 | 900.4480 | 2 | 52.73 | 2        | F2:123202 | 20210611-09_2021021-OK160A_816_5.3.236.mgf |              | 0            | 0        | 0                | 0                | 747   | 762 |     |        | PEAKS DB |
| K.FSVSPVVR.V         | Y    | 68.20  | 889.5021  | 8      | 0.8 | 445.7568 | 2 | 30.49 | 2        | F2:84306  | 20210611-09_2021021-OK160A_816_5.3.236.mgf |              | 0            | 0        | 0                | 0                | 460   | 467 |     |        | PEAKS DB |
| R.NMSVIAHVDHKG.S     | Y    | 61.46  | 1306.6451 | 12     | 2.0 | 436.5547 | 3 | 19.04 | 2        | F2:64665  | 20210611-09_2021021-OK160A_816_5.3.236.mgf |              | 0            | 0        | 0                | 0                | 21    | 32  |     |        | PEAKS DB |
| M.VNFTVDQIR.A        | Y    | 59.81  | 1090.5771 | 9      | 1.3 | 546.2943 | 2 | 34.09 | 2        | F2:90876  | 20210611-09_2021021-OK160A_816_5.3.236.mgf |              | 0            | 0        | 0                | 0                | 2     | 10  |     |        | PEAKS DB |
| total 4 peptides     |      |        |           |        |     |          |   |       |          |           |                                            |              |              |          |                  |                  |       |     |     |        |          |

gene:107289560

[back to list](#)

| [Protein Coverage](#) | [Supporting Peptides](#) |

Protein Coverage:

1   MDDREDLVYQ AKLAEQAERY DEMVESMKKV AGMDVELTVE ER**NLLSVAYK** NVIGARRASW RIISIEQKE ENKGGEDK LK

81   MIREYRQ MVE TELKLICCDI LDVLDKHLIP AANTGESKVF YYKMKGDYHR YLAEFATGND RKEAAENSLV AYKAASDIAM

161   TELPPTHPIR LGLALNFSVF YYEILNSPDR ACRLAK**AAFD DAIAELDTLS EESYKSTLI MQLLR**DNLT L WTS DMQGDGE

241   EQSKEALQDV EDETQ

Supporting Peptides:

| Peptide                 | Uniq | -10lgP | Mass      | Length | ppm  | m/z       | z | RT    | Fraction | Scan      | Source File                                | Area ebraeus | Area judaeus | #Feature | #Feature ebraeus | #Feature judaeus | Start | End | PTM | AScore | Found By |
|-------------------------|------|--------|-----------|--------|------|-----------|---|-------|----------|-----------|--------------------------------------------|--------------|--------------|----------|------------------|------------------|-------|-----|-----|--------|----------|
| K.AAFDDAIAELDTLSEESYK.D | Y    | 106.31 | 2086.9583 | 19     | 5.3  | 1044.4875 | 2 | 58.44 | 2        | F2:130765 | 20210611-09_2021021-OK160A_816_5.3.236.mgf |              | 0            | 0        | 0                | 0                | 197   | 215 |     |        | PEAKS DB |
| K.DSTLIMQLLR.D          | Y    | 79.20  | 1188.6537 | 10     | -2.2 | 595.3303  | 2 | 56.63 | 2        | F2:128557 | 20210611-09_2021021-OK160A_816_5.3.236.mgf | 0            | 0            | 0        | 0                | 0                | 216   | 225 |     |        | PEAKS DB |
| R.NLLSVAYK.N            | Y    | 68.03  | 906.5175  | 8      | 2.8  | 454.2654  | 2 | 33.79 | 2        | F2:90231  | 20210611-09_2021021-OK160A_816_5.3.236.mgf | 0            | 0            | 0        | 0                | 0                | 43    | 50  |     |        | PEAKS DB |
| total 3 peptides        |      |        |           |        |      |           |   |       |          |           |                                            |              |              |          |                  |                  |       |     |     |        |          |

OK193\_E\_248\_Conodipine

[back to list](#)

| [Protein Coverage](#) | [Supporting Peptides](#) |

Protein Coverage:

1 MKMLESALWI LAALALPWIV AQDSSTAELC KINSNGCSVP FAFIPCQKHF LAACDIHDNC YLCAHFGFLT RNNCDNAFLT Carbamidomethylation (+57.02)

81 HMTALCAQGT DEGGFCLERR KRR**EASSMFI** **TTPLR**QLRL LEK**LMPPNSL** **SDHDSR**QPQQ **RFFTCTDWAK** **NYFDAVR**ISG

161 SSYFSDTANA TYCPQFVDCM P

Supporting Peptides:

| Peptide               | Uniq | -10lgP | Mass      | Length | ppm  | m/z      | z | RT    | Fraction | Scan     | Source File                                | Area ebraeus | Area judaeus | #Feature | #Feature ebraeus | #Feature judaeus | Start | End | PTM                  | AScore                           | Found By |
|-----------------------|------|--------|-----------|--------|------|----------|---|-------|----------|----------|--------------------------------------------|--------------|--------------|----------|------------------|------------------|-------|-----|----------------------|----------------------------------|----------|
| K.LMPPNLSLDHDSR.Q     | N    | 82.88  | 1467.6776 | 13     | -0.2 | 490.2312 | 3 | 23.57 | 1        | F1:16022 | 20210611-08_2021021-OK192A_815_5.3.236.mgf | 0            |              | 0        | 0                | 0                | 124   | 136 |                      |                                  | PEAKS DB |
| R.EASSMFITTPLR.Q      | N    | 80.11  | 1452.7283 | 13     | 1.2  | 727.3695 | 2 | 41.94 | 1        | F1:39695 | 20210611-08_2021021-OK192A_815_5.3.236.mgf | 0            |              | 0        | 0                | 0                | 104   | 116 |                      |                                  | PEAKS DB |
| K.NYFDAVR.I           | Y    | 78.72  | 883.4188  | 7      | 2.1  | 442.7159 | 2 | 29.12 | 1        | F1:23959 | 20210611-08_2021021-OK192A_815_5.3.236.mgf | 0            |              | 0        | 0                | 0                | 151   | 157 |                      |                                  | PEAKS DB |
| R.FFTC(+57.02)TDWAK.N | Y    | 66.58  | 1174.5117 | 9      | 3.5  | 588.2629 | 2 | 37.66 | 1        | F1:35030 | 20210611-08_2021021-OK192A_815_5.3.236.mgf | 0            |              | 0        | 0                | 0                | 142   | 150 | Carbamidomethylation | C4:Carbamidomethylation:10 00.00 | PEAKS DB |
| total 4 peptides      |      |        |           |        |      |          |   |       |          |          |                                            |              |              |          |                  |                  |       |     |                      |                                  |          |

SRX1323887\_E\_230\_Conodipine

[back to list](#)

| [Protein Coverage](#) | [Supporting Peptides](#) |

Protein Coverage:

1 MKMLESALWI LAALALTWIV AQDSSTAELC KINSNGCSVP FAFIPCQKHF LAACDIHDNC YLCAHFGFLT RNNCDNAFLT Carbamidomethylation (+57.02)

81 HMTALCAQGT DEGGFCLERR KRR**EASSMFI** **TTPLR**QLRL LEK**LMPPNSL** **SDHDSR**QPQQ **RFFTCTDWAK** **NYFDAVR**ISG

161 SSYFSDTANA TYCPQFVDCM P

Supporting Peptides:

| Peptide               | Uniq | -10lgP | Mass      | Length | ppm  | m/z      | z | RT    | Fraction | Scan     | Source File                                | Area ebraeus | Area judaeus | #Feature | #Feature ebraeus | #Feature judaeus | Start | End | PTM                  | AScore                           | Found By |
|-----------------------|------|--------|-----------|--------|------|----------|---|-------|----------|----------|--------------------------------------------|--------------|--------------|----------|------------------|------------------|-------|-----|----------------------|----------------------------------|----------|
| K.LMPPNLSLDHDSR.Q     | N    | 82.88  | 1467.6776 | 13     | -0.2 | 490.2312 | 3 | 23.57 | 1        | F1:16022 | 20210611-08_2021021-OK192A_815_5.3.236.mgf | 0            |              | 0        | 0                | 0                | 124   | 136 |                      |                                  | PEAKS DB |
| R.EASSMFITTPLR.Q      | N    | 80.11  | 1452.7283 | 13     | 1.2  | 727.3695 | 2 | 41.94 | 1        | F1:39695 | 20210611-08_2021021-OK192A_815_5.3.236.mgf | 0            |              | 0        | 0                | 0                | 104   | 116 |                      |                                  | PEAKS DB |
| K.NYFDAVR.I           | Y    | 78.72  | 883.4188  | 7      | 2.1  | 442.7159 | 2 | 29.12 | 1        | F1:23959 | 20210611-08_2021021-OK192A_815_5.3.236.mgf | 0            |              | 0        | 0                | 0                | 151   | 157 |                      |                                  | PEAKS DB |
| R.FFTC(+57.02)TDWAK.N | Y    | 66.58  | 1174.5117 | 9      | 3.5  | 588.2629 | 2 | 37.66 | 1        | F1:35030 | 20210611-08_2021021-OK192A_815_5.3.236.mgf | 0            |              | 0        | 0                | 0                | 142   | 150 | Carbamidomethylation | C4:Carbamidomethylation:10 00.00 | PEAKS DB |
| total 4 peptides      |      |        |           |        |      |          |   |       |          |          |                                            |              |              |          |                  |                  |       |     |                      |                                  |          |

OK213\_E\_301\_Conodipine

[back to list](#)

| [Protein Coverage](#) | [Supporting Peptides](#) |

Protein Coverage:

1 MKMLESALWI LAALALTWIV AQDSSTAELC KINSNGCSVP SALIPCQKHF LAACDIHDNC YLCAHFGFLT RNNCDNAFLT Carbamidomethylation (+57.02)

81 HMTALCAQGT DEGGFCLERR KRR**EASSMFI** **TTPLR**QLRL LEK**LMPPNSL** **SDHDSR**QPQQ **RFFTCTDWAK** **NYFDAVR**ISG

161 SSYFSDTANA TYCPQFVDCM PQV

Supporting Peptides:

| Peptide               | Uniq | -10lgP | Mass      | Length | ppm  | m/z      | z | RT    | Fraction | Scan     | Source File                                | Area ebraeus | Area judaeus | #Feature | #Feature ebraeus | #Feature judaeus | Start | End | PTM                  | AScore                           | Found By |
|-----------------------|------|--------|-----------|--------|------|----------|---|-------|----------|----------|--------------------------------------------|--------------|--------------|----------|------------------|------------------|-------|-----|----------------------|----------------------------------|----------|
| K.LMPPNLSLDHDSR.Q     | N    | 82.88  | 1467.6776 | 13     | -0.2 | 490.2312 | 3 | 23.57 | 1        | F1:16022 | 20210611-08_2021021-OK192A_815_5.3.236.mgf | 0            |              | 0        | 0                | 0                | 124   | 136 |                      |                                  | PEAKS DB |
| R.EASSMFITTPLR.Q      | N    | 80.11  | 1452.7283 | 13     | 1.2  | 727.3695 | 2 | 41.94 | 1        | F1:39695 | 20210611-08_2021021-OK192A_815_5.3.236.mgf | 0            |              | 0        | 0                | 0                | 104   | 116 |                      |                                  | PEAKS DB |
| K.NYFDAVR.I           | Y    | 78.72  | 883.4188  | 7      | 2.1  | 442.7159 | 2 | 29.12 | 1        | F1:23959 | 20210611-08_2021021-OK192A_815_5.3.236.mgf | 0            |              | 0        | 0                | 0                | 151   | 157 |                      |                                  | PEAKS DB |
| R.FFTC(+57.02)TDWAK.N | Y    | 66.58  | 1174.5117 | 9      | 3.5  | 588.2629 | 2 | 37.66 | 1        | F1:35030 | 20210611-08_2021021-OK192A_815_5.3.236.mgf | 0            |              | 0        | 0                | 0                | 142   | 150 | Carbamidomethylation | C4:Carbamidomethylation:10 00.00 | PEAKS DB |
| total 4 peptides      |      |        |           |        |      |          |   |       |          |          |                                            |              |              |          |                  |                  |       |     |                      |                                  |          |

OK006\_E\_272\_Conodipine

[back to list](#)

| [Protein Coverage](#) | [Supporting Peptides](#) |

Protein Coverage:

1 MKMLESALWI LAALALTWIV AQDSSTAELC KINSNGCSVP SALIPCQKHF LAACDIHDNC YLCAHFGFLT RNNCDNAFLT Carbamidomethylation (+57.02)

81 HMTALCAQGT DEGGFCLERR KRR**EASSMFI** **TTPLR**QLRL LEK**LMPPNSL** **SDHDSR**QPQQ **RFFTCTDWAK** **NYFDAVR**ISG

161 SSYFSDTANA TYCPQFVDCM PQV

Supporting Peptides:

| Peptide               | Uniq | -10lgP | Mass      | Length | ppm  | m/z      | z | RT    | Fraction | Scan     | Source File                                | Area ebraeus | Area judaeus | #Feature | #Feature ebraeus | #Feature judaeus | Start | End | PTM                  | AScore                           | Found By |
|-----------------------|------|--------|-----------|--------|------|----------|---|-------|----------|----------|--------------------------------------------|--------------|--------------|----------|------------------|------------------|-------|-----|----------------------|----------------------------------|----------|
| K.LMPPNLSLDHDSR.Q     | N    | 82.88  | 1467.6776 | 13     | -0.2 | 490.2312 | 3 | 23.57 | 1        | F1:16022 | 20210611-08_2021021-OK192A_815_5.3.236.mgf | 0            |              | 0        | 0                | 0                | 124   | 136 |                      |                                  | PEAKS DB |
| R.EASSMFITTPLR.Q      | N    | 80.11  | 1452.7283 | 13     | 1.2  | 727.3695 | 2 | 41.94 | 1        | F1:39695 | 20210611-08_2021021-OK192A_815_5.3.236.mgf | 0            |              | 0        | 0                | 0                | 104   | 116 |                      |                                  | PEAKS DB |
| K.NYFDAVR.I           | Y    | 78.72  | 883.4188  | 7      | 2.1  | 442.7159 | 2 | 29.12 | 1        | F1:23959 | 20210611-08_2021021-OK192A_815_5.3.236.mgf | 0            |              | 0        | 0                | 0                | 151   | 157 |                      |                                  | PEAKS DB |
| R.FFTC(+57.02)TDWAK.N | Y    | 66.58  | 1174.5117 | 9      | 3.5  | 588.2629 | 2 | 37.66 | 1        | F1:35030 | 20210611-08_2021021-OK192A_815_5.3.236.mgf | 0            |              | 0        | 0                | 0                | 142   | 150 | Carbamidomethylation | C4:Carbamidomethylation:10 00.00 | PEAKS DB |
| total 4 peptides      |      |        |           |        |      |          |   |       |          |          |                                            |              |              |          |                  |                  |       |     |                      |                                  |          |

V\_1302\_329\_T-3-WF

[back to list](#)

| [Protein Coverage](#) | [Supporting Peptides](#) |

Protein Coverage:

1 SPAAPNPVER R**IQSDLIRAG** **LEGADMETEE** RFIGALFGPV VDAVTSLFKG RKK Oxidation (M) (+15.99)

Supporting Peptides:

| Peptide                   | Uniq | -10lgP | Mass      | Length | ppm  | m/z      | z | RT    | Fraction | Scan     | Source File                                | Area ebraeus | Area judaeus | #Feature | #Feature ebraeus | #Feature judaeus | Start | End | PTM           | AScore                   | Found By |
|---------------------------|------|--------|-----------|--------|------|----------|---|-------|----------|----------|--------------------------------------------|--------------|--------------|----------|------------------|------------------|-------|-----|---------------|--------------------------|----------|
| R.AGLEGADMETEER.F         | Y    | 130.51 | 1406.5984 | 13     | 3.6  | 704.3063 | 2 | 24.58 | 1        | F1:17622 | 20210611-08_2021021-OK192A_815_5.3.236.mgf | 0            |              | 0        | 0                | 0                | 19    | 31  |               |                          | PEAKS DB |
| R.AGLEGADM(+15.99)ETEER.F | Y    | 123.92 | 1422.5933 | 13     | -1.7 | 712.3000 | 2 | 18.84 | 1        | F1:10158 | 20210611-08_2021021-OK192A_815_5.3.236.mgf | 0            | 0            | 0        | 0                | 0                | 19    | 31  | Oxidation (M) | M8:Oxidation (M):1000.00 | PEAKS DB |

total 3 peptides



| Peptide          | Uniq | -10lgP | Mass      | Length | ppm | m/z      | z | RT    | Fraction | Scan     | Source File                                | Area ebraeus | Area judaeus | #Feature | #Feature ebraeus | #Feature judaeus | Start | End | PTM | AScore | Found By |
|------------------|------|--------|-----------|--------|-----|----------|---|-------|----------|----------|--------------------------------------------|--------------|--------------|----------|------------------|------------------|-------|-----|-----|--------|----------|
| K.HSEIQQANLKA    | Y    | 95.90  | 1166.6044 | 10     | 4.5 | 584.3096 | 2 | 14.53 | 2        | F2:58162 | 20210611-09_2021021-OK160A_816_5.3.236.mgf |              | 0            | 0        | 0                | 0                | 319   | 328 |     |        | PEAKS DB |
| K.VFNVNTLER.V    | Y    | 74.51  | 1154.5720 | 9      | 2.9 | 578.2925 | 2 | 31.81 | 2        | F2:86429 | 20210611-09_2021021-OK160A_816_5.3.236.mgf |              | 0            | 0        | 0                | 0                | 83    | 91  |     |        | PEAKS DB |
| R.TYLPQSQVSR.V   | Y    | 70.11  | 1049.5505 | 9      | 4.9 | 525.7829 | 2 | 25.12 | 2        | F2:74725 | 20210611-09_2021021-OK160A_816_5.3.236.mgf |              | 0            | 0        | 0                | 0                | 760   | 768 |     |        | PEAKS DB |
| total 3 peptides |      |        |           |        |     |          |   |       |          |          |                                            |              |              |          |                  |                  |       |     |     |        |          |

OK212\_J\_239\_Cerm08

back to list

| [Protein Coverage](#) | [Supporting Peptides](#) |

Protein Coverage:

1

TVTLDTCSA KVVCAWAGQG ESCSCSATHS CTQDDAHKVE VNMERGVQAL YTCQQISDFD K

KCTATGAVMP ADLSQLYCR

Carbamidomethylation (+57.02)

81

SNNKYTIEND DVVC

Supporting Peptides:

| Peptide                      | Uniq | -10lgP | Mass      | Length | ppm | m/z      | z | RT    | Fraction | Scan      | Source File                                | Area ebraeus | Area judaeus | #Feature | #Feature ebraeus | #Feature judaeus | Start | End | PTM                  | AScore                           | Found By |
|------------------------------|------|--------|-----------|--------|-----|----------|---|-------|----------|-----------|--------------------------------------------|--------------|--------------|----------|------------------|------------------|-------|-----|----------------------|----------------------------------|----------|
| R.GVQALYTC(+57.02)QQISDFDK.C | Y    | 119.48 | 1871.8723 | 16     | 2.9 | 936.9422 | 2 | 40.69 | 2        | F2:102502 | 20210611-09_2021021-OK160A_816_5.3.236.mgf | 0            | 0            | 0        | 0                | 0                | 46    | 61  | Carbamidomethylation | C8:Carbamido methylation:1000.00 | PEAKS DB |
| TVTLDTC(+57.02)ASAK.V        | Y    | 66.61  | 1165.5649 | 11     | 1.1 | 583.7880 | 2 | 20.65 | 2        | F2:66937  | 20210611-09_2021021-OK160A_816_5.3.236.mgf | 0            | 0            | 0        | 0                | 0                | 1     | 11  |                      | C7:Carbamido methylation:1000.00 | PEAKS DB |
| total 2 peptides             |      |        |           |        |     |          |   |       |          |           |                                            |              |              |          |                  |                  |       |     |                      |                                  |          |

CebrOK033\_J\_197\_Cerm08

back to list

| [Protein Coverage](#) | [Supporting Peptides](#) |

Protein Coverage:

1

TVTLDTCSA KVVCAWAGQG ESCSCSATHS CTQDDAHKVE VNMERGVQAL YTCQQISDFD K

KCTATGAVMP ADLSQLYCR

Carbamidomethylation (+57.02)

81

SNNKYTIEND DVVC

Supporting Peptides:

| Peptide                      | Uniq | -10lgP | Mass      | Length | ppm | m/z      | z | RT    | Fraction | Scan      | Source File                                | Area ebraeus | Area judaeus | #Feature | #Feature ebraeus | #Feature judaeus | Start | End | PTM                  | AScore                            | Found By |
|------------------------------|------|--------|-----------|--------|-----|----------|---|-------|----------|-----------|--------------------------------------------|--------------|--------------|----------|------------------|------------------|-------|-----|----------------------|-----------------------------------|----------|
| R.GVQALYTC(+57.02)QQISDFDK.C | Y    | 119.48 | 1871.8723 | 16     | 2.9 | 936.9422 | 2 | 40.69 | 2        | F2:102502 | 20210611-09_2021021-OK160A_816_5.3.236.mgf |              | 0            | 0        | 0                | 0                | 46    | 61  | Carbamidomethylation | C8:Carbamido methylation:1 000.00 | PEAKS DB |
| TVTLDTC(+57.02)ASAK.V        | Y    | 66.61  | 1165.5649 | 11     | 1.1 | 583.7880 | 2 | 20.65 | 2        | F2:66937  | 20210611-09_2021021-OK160A_816_5.3.236.mgf |              | 0            | 0        | 0                | 0                | 1     | 11  |                      | C7:Carbamido methylation:1 000.00 | PEAKS DB |
| total 2 peptides             |      |        |           |        |     |          |   |       |          |           |                                            |              |              |          |                  |                  |       |     |                      |                                   |          |

gene:107285995

back to list

| [Protein Coverage](#) | [Supporting Peptides](#) |

Protein Coverage:

1

MGNIFANL FKGLFGKKEMRI LMVGLDAAGK

TTILYKLKLG EIVTTIPTIG FNVETVEYKN ISFTVWDVGG QDK

IRPLWRH

81

YFQNTQGLIF VVDSNDRERV NEAREELMRM LAEDELRAV LLVFANKQDL PNAMNAEIT DKLGHLSLRH RNWYIQTCA

161

TSGDGLYEGL DWLSNQLRNQ K

Supporting Peptides:

| Peptide                   | Uniq | -10lgP | Mass      | Length | ppm  | m/z       | z | RT    | Fraction | Scan      | Source File                                | Area ebraeus | Area judaeus | #Feature | #Feature ebraeus | #Feature judaeus | Start | End | PTM | AScore | Found By |
|---------------------------|------|--------|-----------|--------|------|-----------|---|-------|----------|-----------|--------------------------------------------|--------------|--------------|----------|------------------|------------------|-------|-----|-----|--------|----------|
| K.NISFTVWDVGGQDK.I        | Y    | 89.28  | 1564.7522 | 14     | -0.3 | 783.3802  | 2 | 48.12 | 1        | F1:46181  | 20210611-08_2021021-OK192A_815_5.3.236.mgf | 0            | 0            | 0        | 0                | 0                | 60    | 73  |     |        | PEAKS DB |
| K.LGEIVTTIPTIGFNVETVEYK.N | Y    | 89.20  | 2322.2358 | 21     | 9.9  | 1162.1318 | 2 | 57.68 | 2        | F2:129913 | 20210611-09_2021021-OK160A_816_5.3.236.mgf |              | 0            | 0        | 0                | 0                | 39    | 59  |     |        | PEAKS DB |
| R.ILMVGLDAAGK.T           | Y    | 54.33  | 1086.6107 | 11     | 0.2  | 544.3105  | 2 | 39.00 | 2        | F2:99680  | 20210611-09_2021021-OK160A_816_5.3.236.mgf |              |              | 0        | 0                | 0                | 20    | 30  |     |        | PEAKS DB |
| total 3 peptides          |      |        |           |        |      |           |   |       |          |           |                                            |              |              |          |                  |                  |       |     |     |        |          |

V\_CG13\_085\_B2

back to list

| [Protein Coverage](#) | [Supporting Peptides](#) |

Protein Coverage:

1

YPQRREGAPA DAANLQGFDQ GMQAMPNMQG MGMQPMQAMP GMGAGQMLPF NPNFALGYKR AFDENLEKRR EHSKFNDDNM

Oxidation (M) (+15.99)

81

SPFDSGDGLG NFMNFMKONG NNLPPANMDS AATDLGNFQP SAENEDGKFR

FFDQQQ

Supporting Peptides:

| Peptide                                             | Uniq | -10lgP | Mass      | Length | ppm | m/z       | z | RT    | Fraction | Scan     | Source File                                | Area ebraeus | Area judaeus | #Feature | #Feature ebraeus | #Feature judaeus | Start | End | PTM           | AScore                                 |  |
|-----------------------------------------------------|------|--------|-----------|--------|-----|-----------|---|-------|----------|----------|--------------------------------------------|--------------|--------------|----------|------------------|------------------|-------|-----|---------------|----------------------------------------|--|
| K.FNDDNM(+15.99)SPFDSGDGLGNFM(+15.99)NFM(+15.99)K.D | Y    | 105.24 | 2647.0300 | 23     | 4.3 | 883.3511  | 3 | 48.22 | 1        | F1:46215 | 20210611-08_2021021-OK192A_815_5.3.236.mgf | 0            |              | 0        | 0                | 0                | 75    | 97  | Oxidation (M) | M: id: (h OK M: id: (h OK M: id: (h OK |  |
| K.DNGNNLPANMDSAATDLGNFQPSAENEDGK.F                  | Y    | 90.32  | 3252.3901 | 31     | 9.1 | 1085.1431 | 3 | 53.35 | 1        | F1:49178 | 20210611-08_2021021-OK192A_815_5.3.236.mgf | 0            |              | 0        | 0                | 0                | 98    | 128 |               |                                        |  |
| K.DNGNNLPANM(+15.99)DSAATDLGNFQPSAENEDGK.F          | Y    | 89.17  | 3268.3850 | 31     | 7.9 | 1090.4734 | 3 | 46.90 | 1        | F1:45224 | 20210611-08_2021021-OK192A_815_5.3.236.mgf | 0            |              | 0        | 0                | 0                | 98    | 128 |               | M: id: (h OK                           |  |
| total 3 peptides                                    |      |        |           |        |     |           |   |       |          |          |                                            |              |              |          |                  |                  |       |     |               |                                        |  |

OK214\_J\_237\_Cerm03

back to list

| [Protein Coverage](#) | [Supporting Peptides](#) |

Protein Coverage:

1

LMPKTATK RKDVAPNDRHAV DSQK

LKRFC

Supporting Peptides:



| Peptide               | Uniq | -10lgP | Mass      | Length | ppm  | m/z      | z | RT   | Fraction | Scan     | Source File                                | Area ebraeus | Area judaeus | #Feature | #Feature ebraeus | #Feature judaeus | Start | End | PTM | AScore | Found By |
|-----------------------|------|--------|-----------|--------|------|----------|---|------|----------|----------|--------------------------------------------|--------------|--------------|----------|------------------|------------------|-------|-----|-----|--------|----------|
| R.KDVAPNDRHAVDSQK.L   | Y    | 80.06  | 1678.8386 | 15     | -1.6 | 560.6169 | 3 | 9.36 | 2        | F2:52796 | 20210611-09_2021021-OK160A_816_5.3.236.mgf |              | 0            | 0        | 0                | 0                | 10    | 24  |     |        | PEAKS DB |
| R.HAVDSQK.L           | Y    | 67.82  | 783.3875  | 7      | 6.3  | 392.7018 | 2 | 5.11 | 2        | F2:52246 | 20210611-09_2021021-OK160A_816_5.3.236.mgf |              | 0            | 0        | 0                | 0                | 18    | 24  |     |        | PEAKS DB |
| K.RKDVPAPNDRHAVDSQK.L | Y    | 67.09  | 1834.9397 | 16     | 1.7  | 459.7411 | 4 | 8.74 | 2        | F2:52569 | 20210611-09_2021021-OK160A_816_5.3.236.mgf |              | 0            | 0        | 0                | 0                | 9     | 24  |     |        | PEAKS DB |
| R.KDVAPNDR.H          | Y    | 54.21  | 913.4617  | 8      | 0.6  | 457.7365 | 2 | 6.98 | 2        | F2:52348 | 20210611-09_2021021-OK160A_816_5.3.236.mgf |              | 0            | 0        | 0                | 0                | 10    | 17  |     |        | PEAKS DB |
| total 4 peptides      |      |        |           |        |      |          |   |      |          |          |                                            |              |              |          |                  |                  |       |     |     |        |          |

OK212\_J\_300\_Thioredoxin

back to list

| [Protein Coverage](#) | [Supporting Peptides](#) |

Protein Coverage:

- 1MAANTAHVVC LIALFILVCV SCDNDHGSDA VSYERDAFQS AINDKKHFVM FFAPWCGHCK RLAPTWNELA KVYNDESSV
- 81TIAKVDCTVE TALCSEHDVT GYPTLKFFHK KADDFQRYKG NRDLDSLKKF VEEQASRTDS EGEQATQAE PGAGALVELT
- 161DDTFDAFIQK GFHFVKFYAP WCGHCKRLAP TWEELASSFA ENQQVSVSKV DCTVSTKLCT SQGVRGYPTL ILFNDGDKFE
- 241QYQGSRSLED LKGFTSKME EVLGFQQQEA VPREEQEAV VDLTGDTFEE VISEGLTFVK FFAPWCGHCK RLAPTWEELA
- 321RTNMDKDIVI ARVDCTQHKSV CDEQKVQGY PTLVLFQNGK RKNDYKGQRD LGSLQGFVDS HVEHTEL

Supporting Peptides:

| Peptide              | Uniq | -10lgP | Mass      | Length | ppm  | m/z      | z | RT    | Fraction | Scan      | Source File                                | Area ebraeus | Area judaeus | #Feature | #Feature ebraeus | #Feature judaeus | Start | End | PTM | AScore | Found By |
|----------------------|------|--------|-----------|--------|------|----------|---|-------|----------|-----------|--------------------------------------------|--------------|--------------|----------|------------------|------------------|-------|-----|-----|--------|----------|
| K.VYNDESSVTIAK.V     | Y    | 112.20 | 1438.6940 | 13     | 2.0  | 720.3527 | 2 | 22.87 | 2        | F2:70797  | 20210611-09_2021021-OK160A_816_5.3.236.mgf |              | 0            | 0        | 0                | 0                | 72    | 84  |     |        | PEAKS DB |
| R.DLGSLQGFVDSHVEHTEL | Y    | 72.82  | 1981.9381 | 18     | -5.7 | 661.6468 | 3 | 52.41 | 2        | F2:122758 | 20210611-09_2021021-OK160A_816_5.3.236.mgf |              | 0            | 0        | 0                | 0                | 370   | 387 |     |        | PEAKS DB |
| total 2 peptides     |      |        |           |        |      |          |   |       |          |           |                                            |              |              |          |                  |                  |       |     |     |        |          |

OK005\_J\_306\_Thioredoxin

back to list

| [Protein Coverage](#) | [Supporting Peptides](#) |

Protein Coverage:

- 1MAANTAHVVC LIALFILVCV SCDNDHGSDA VSYERDAFQS AINDKKHFVM FFAPWCGHCK RLAPTWNELA KVYNDESSV
- 81TIAKVDCTVE TALCSEHDVT GYPTLKFFHK KADDFQRYKG NRDLDSLKKF VEEQASRTDS EGEQATQAE PGAGALVELT
- 161DDTFDAFIQK GFHFVKFYAP WCGHCKRLAP TWEELASSFA ENQQVSVSKV DCTVSTKLCT SQGVRGYPTL ILFNDGDKFE
- 241QYQGSRSLED LKGFTSKME EVLGFQQQEA VPREEQEAV VDLTGDTFEE VISEGLTFVK FFAPWCGHCK RLAPTWEELA
- 321RTNMDKDIVI ARVDCTQHKSV CDEQKVQGY PTLVLFQNGK RKNDYKGQRD LGSLQGFVDS HVEHTEL

Supporting Peptides:

| Peptide              | Uniq | -10lgP | Mass      | Length | ppm  | m/z      | z | RT    | Fraction | Scan      | Source File                                | Area ebraeus | Area judaeus | #Feature | #Feature ebraeus | #Feature judaeus | Start | End | PTM | AScore | Found By |
|----------------------|------|--------|-----------|--------|------|----------|---|-------|----------|-----------|--------------------------------------------|--------------|--------------|----------|------------------|------------------|-------|-----|-----|--------|----------|
| K.VYNDESSVTIAK.V     | Y    | 112.20 | 1438.6940 | 13     | 2.0  | 720.3527 | 2 | 22.87 | 2        | F2:70797  | 20210611-09_2021021-OK160A_816_5.3.236.mgf |              | 0            | 0        | 0                | 0                | 72    | 84  |     |        | PEAKS DB |
| R.DLGSLQGFVDSHVEHTEL | Y    | 72.82  | 1981.9381 | 18     | -5.7 | 661.6468 | 3 | 52.41 | 2        | F2:122758 | 20210611-09_2021021-OK160A_816_5.3.236.mgf |              | 0            | 0        | 0                | 0                | 370   | 387 |     |        | PEAKS DB |
| total 2 peptides     |      |        |           |        |      |          |   |       |          |           |                                            |              |              |          |                  |                  |       |     |     |        |          |

SRX1323887\_E\_229\_Conodipine

back to list

| [Protein Coverage](#) | [Supporting Peptides](#) |

Protein Coverage:

- 1MKMESALWI LAALALTWIV AQDSSTAELC KINSNGCSVP FAFIPCQKHF LAACDIHNC YLCAHFGLT RNNCDNAFLT Carbamidomethylation (+57.02)
- 81HMTALCAQGT DEGGFCLERR KRREASSMFI TTTPLRQLRL LEKLMPPNSL SDHDSRQPQQ <sup>145</sup>RFFCTEWAE KYFDAVRTSG <sub>C</sub>
- 161SSYFSDTANA TYCPQFVDCM P

Supporting Peptides:

| Peptide                | Uniq | -10lgP | Mass      | Length | ppm  | m/z      | z | RT    | Fraction | Scan     | Source File                                | Area ebraeus | Area judaeus | #Feature | #Feature ebraeus | #Feature judaeus | Start | End | PTM                  | AScore                          | Found By |
|------------------------|------|--------|-----------|--------|------|----------|---|-------|----------|----------|--------------------------------------------|--------------|--------------|----------|------------------|------------------|-------|-----|----------------------|---------------------------------|----------|
| K.LMPPNSLSHDHRSR.Q     | N    | 82.88  | 1467.6776 | 13     | -0.2 | 490.2312 | 3 | 23.57 | 1        | F1:16022 | 20210611-08_2021021-OK192A_815_5.3.236.mgf | 0            |              | 0        | 0                | 0                | 124   | 136 |                      |                                 | PEAKS DB |
| R.EASSMITTTPLR.Q       | N    | 80.11  | 1452.7283 | 13     | 1.2  | 727.3695 | 2 | 41.94 | 1        | F1:39695 | 20210611-08_2021021-OK192A_815_5.3.236.mgf | 0            |              | 0        | 0                | 0                | 104   | 116 |                      |                                 | PEAKS DB |
| R.FFTC(+57.02)TEWAEK.Y | Y    | 68.97  | 1317.5699 | 10     | 0.2  | 659.7899 | 2 | 37.22 | 1        | F1:34554 | 20210611-08_2021021-OK192A_815_5.3.236.mgf | 0            |              | 0        | 0                | 0                | 142   | 151 | Carbamidomethylation | C4:Carbamidomethylation:1000.00 | PEAKS DB |
| total 3 peptides       |      |        |           |        |      |          |   |       |          |          |                                            |              |              |          |                  |                  |       |     |                      |                                 |          |

OK193\_E\_247\_Conodipine

back to list

| [Protein Coverage](#) | [Supporting Peptides](#) |

Protein Coverage:

- 1MKMESALWI LAALALPWIV AQDSSTAELC KINSNGCSVP FAFIPCQKHF LAACDIHNC YLCAHFGLT RNNCDNAFLT Carbamidomethylation (+57.02)
- 81HMTALCAQGT DEGGFCLERR KRREASSMFI TTTPLRQLRL LEKLMPPNSL SDHDSRQPQQ <sup>145</sup>RFFCTEWAE KYFDAVRTSG <sub>C</sub>
- 161SSYFSDTANA TYCPQFVDCM P

Supporting Peptides:

| Peptide                | Uniq | -10lgP | Mass      | Length | ppm  | m/z      | z | RT    | Fraction | Scan     | Source File                                | Area ebraeus | Area judaeus | #Feature | #Feature ebraeus | #Feature judaeus | Start | End | PTM                  | AScore                          | Found By |
|------------------------|------|--------|-----------|--------|------|----------|---|-------|----------|----------|--------------------------------------------|--------------|--------------|----------|------------------|------------------|-------|-----|----------------------|---------------------------------|----------|
| K.LMPPNSLSHDHRSR.Q     | N    | 82.88  | 1467.6776 | 13     | -0.2 | 490.2312 | 3 | 23.57 | 1        | F1:16022 | 20210611-08_2021021-OK192A_815_5.3.236.mgf | 0            |              | 0        | 0                | 0                | 124   | 136 |                      |                                 | PEAKS DB |
| R.EASSMITTTPLR.Q       | N    | 80.11  | 1452.7283 | 13     | 1.2  | 727.3695 | 2 | 41.94 | 1        | F1:39695 | 20210611-08_2021021-OK192A_815_5.3.236.mgf | 0            |              | 0        | 0                | 0                | 104   | 116 |                      |                                 | PEAKS DB |
| R.FFTC(+57.02)TEWAEK.Y | Y    | 68.97  | 1317.5699 | 10     | 0.2  | 659.7899 | 2 | 37.22 | 1        | F1:34554 | 20210611-08_2021021-OK192A_815_5.3.236.mgf | 0            |              | 0        | 0                | 0                | 142   | 151 | Carbamidomethylation | C4:Carbamidomethylation:1000.00 | PEAKS DB |
| total 3 peptides       |      |        |           |        |      |          |   |       |          |          |                                            |              |              |          |                  |                  |       |     |                      |                                 |          |

gene:107298953

back to list

| [Protein Coverage](#) | [Supporting Peptides](#) |

Protein Coverage:

- 1MAVTVFLAC SRVGAGAPVY LAAVLEYLTA EILELAGNAA RDNKKTRIIP RHLQLAIRND EELNKLKGK TIAQGGVLPN
- 81IQAVLLPKKT ESHKAKGK

Supporting Peptides:

| Peptide                           | Uniq | -10lgP | Mass      | Length | ppm | m/z      | z | RT    | Fraction | Scan      | Source File                                | Area ebraeus | Area judaeus | #Feature | #Feature ebraeus | #Feature judaeus | Start | End | PTM | AScore | Found By |
|-----------------------------------|------|--------|-----------|--------|-----|----------|---|-------|----------|-----------|--------------------------------------------|--------------|--------------|----------|------------------|------------------|-------|-----|-----|--------|----------|
| R.VGAGAPVYLAAVLEYLTAEILELAGNAAR.D | Y    | 106.24 | 2914.5803 | 29     | 2.0 | 972.5319 | 3 | 66.71 | 2        | F2:134483 | 20210611-09_2021021-OK160A_816_5.3.236.mgf |              | 0            | 0        | 0                | 0                | 13    | 41  |     |        | PEAKS DB |
| R.HLQLAIR.N                       | Y    | 73.85  | 849.5184  | 7      | 2.8 | 425.7659 | 2 | 24.26 | 2        | F2:73252  | 20210611-09_2021021-OK160A_816_5.3.236.mgf | 0            | 0            | 0        | 0                | 0                | 52    | 58  |     |        | PEAKS DB |
| total 2 peptides                  |      |        |           |        |     |          |   |       |          |           |                                            |              |              |          |                  |                  |       |     |     |        |          |

OK212\_J\_224\_Cerm03

[back to list](#)

| [Protein Coverage](#) | [Supporting Peptides](#) |

Protein Coverage:

1 EISRRRTIDGG EDGVLAGDR TNKNALLOQR

Supporting Peptides:

| Peptide            | Uniq | -10lgP | Mass      | Length | ppm | m/z      | z | RT    | Fraction | Scan     | Source File                                | Area ebraeus | Area judaeus | #Feature | #Feature ebraeus | #Feature judaeus | Start | End | PTM | AScore | Found By |
|--------------------|------|--------|-----------|--------|-----|----------|---|-------|----------|----------|--------------------------------------------|--------------|--------------|----------|------------------|------------------|-------|-----|-----|--------|----------|
| R.TIDGGEDEVLAGDR.T | Y    | 104.53 | 1373.6422 | 14     | 4.4 | 687.8285 | 2 | 29.96 | 2        | F2:83337 | 20210611-09_2021021-OK160A_816_5.3.236.mgf |              | 0            | 0        | 0                | 0                | 6     | 19  |     |        | PEAKS DB |
| K.NALLOQR          | N    | 64.80  | 841.4770  | 7      | 4.5 | 421.7459 | 2 | 18.33 | 2        | F2:63419 | 20210611-09_2021021-OK160A_816_5.3.236.mgf | 0            | 0            | 0        | 0                | 0                | 24    | 30  |     |        | PEAKS DB |
| total 2 peptides   |      |        |           |        |     |          |   |       |          |          |                                            |              |              |          |                  |                  |       |     |     |        |          |

OK213\_E\_102\_M

[back to list](#)

| [Protein Coverage](#) | [Supporting Peptides](#) |

Protein Coverage:

1 LDADQPVRE AENKQDLHSD ERTGFILPAQ K

Supporting Peptides:

| Peptide          | Uniq | -10lgP | Mass      | Length | ppm | m/z      | z | RT    | Fraction | Scan     | Source File                                | Area ebraeus | Area judaeus | #Feature | #Feature ebraeus | #Feature judaeus | Start | End | PTM | AScore | Found By |
|------------------|------|--------|-----------|--------|-----|----------|---|-------|----------|----------|--------------------------------------------|--------------|--------------|----------|------------------|------------------|-------|-----|-----|--------|----------|
| LDADQPVRE.E      | Y    | 92.28  | 1041.5090 | 9      | 3.1 | 521.7612 | 2 | 17.81 | 2        | F2:62607 | 20210611-09_2021021-OK160A_816_5.3.236.mgf | 0            | 0            | 0        | 0                | 0                | 1     | 9   |     |        | PEAKS DB |
| R.TGFILPAQK      | Y    | 88.10  | 973.5596  | 9      | 3.3 | 487.7868 | 2 | 33.01 | 1        | F1:29289 | 20210611-09_2021021-OK192A_815_5.3.236.mgf | 0            | 0            | 0        | 0                | 0                | 23    | 31  |     |        | PEAKS DB |
| total 2 peptides |      |        |           |        |     |          |   |       |          |          |                                            |              |              |          |                  |                  |       |     |     |        |          |

V\_CG13\_016\_Conkunitzin-12

[back to list](#)

| [Protein Coverage](#) | [Supporting Peptides](#) |

Protein Coverage:

1 ESIHICDKAK DEGTGSQNIASYFFDRDTGT CETFNYTGGN YDTFPNRFNN CPVCENTCKC KLRKDPGTGE RRRIRYYHSS

81 DSGGCLPFY RIGGNANNF DSESACINEC EL

Supporting Peptides:

| Peptide                | Uniq | -10lgP | Mass      | Length | ppm  | m/z      | z | RT    | Fraction | Scan     | Source File                                | Area ebraeus | Area judaeus | #Feature | #Feature ebraeus | #Feature judaeus | Start | End | PTM | AScore | Found By |
|------------------------|------|--------|-----------|--------|------|----------|---|-------|----------|----------|--------------------------------------------|--------------|--------------|----------|------------------|------------------|-------|-----|-----|--------|----------|
| K.DEGTGSQNIASYFFDR.D   | Y    | 97.30  | 1805.7856 | 16     | -0.2 | 903.8965 | 2 | 51.83 | 1        | F1:48344 | 20210611-08_2021021-OK192A_815_5.3.236.mgf | 0            |              | 0        | 0                | 0                | 11    | 26  |     |        | PEAKS DB |
| K.AKDEGTGSQNIASYFFDR.D | Y    | 74.55  | 2004.9177 | 18     | -1.1 | 669.3099 | 3 | 44.62 | 1        | F1:42703 | 20210611-08_2021021-OK192A_815_5.3.236.mgf | 0            |              | 0        | 0                | 0                | 9     | 26  |     |        | PEAKS DB |
| total 2 peptides       |      |        |           |        |      |          |   |       |          |          |                                            |              |              |          |                  |                  |       |     |     |        |          |

V\_1302\_039\_Conkunitzin-12

[back to list](#)

| [Protein Coverage](#) | [Supporting Peptides](#) |

Protein Coverage:

1 ESIHICDKAK DEGTGSQNIASYFFDRDTGT CETFNYTGGN YDMFPNRFNN CPVCENTCKC KLRKDPGTGE RRRIRYYHSS

81 DSGGCLPFY RIGGNANNF DSESACINEC EL

Supporting Peptides:

| Peptide                | Uniq | -10lgP | Mass      | Length | ppm  | m/z      | z | RT    | Fraction | Scan     | Source File                                | Area ebraeus | Area judaeus | #Feature | #Feature ebraeus | #Feature judaeus | Start | End | PTM | AScore | Found By |
|------------------------|------|--------|-----------|--------|------|----------|---|-------|----------|----------|--------------------------------------------|--------------|--------------|----------|------------------|------------------|-------|-----|-----|--------|----------|
| K.DEGTGSQNIASYFFDR.D   | Y    | 97.30  | 1805.7856 | 16     | -0.2 | 903.8965 | 2 | 51.83 | 1        | F1:48344 | 20210611-08_2021021-OK192A_815_5.3.236.mgf | 0            |              | 0        | 0                | 0                | 11    | 26  |     |        | PEAKS DB |
| K.AKDEGTGSQNIASYFFDR.D | Y    | 74.55  | 2004.9177 | 18     | -1.1 | 669.3099 | 3 | 44.62 | 1        | F1:42703 | 20210611-08_2021021-OK192A_815_5.3.236.mgf | 0            |              | 0        | 0                | 0                | 9     | 26  |     |        | PEAKS DB |
| total 2 peptides       |      |        |           |        |      |          |   |       |          |          |                                            |              |              |          |                  |                  |       |     |     |        |          |

OK213\_E\_009\_B1

[back to list](#)

| [Protein Coverage](#) | [Supporting Peptides](#) |

Protein Coverage:

1 DGGALTERRS ADVTALKPEP VLLQKSAARS TSDNGKDRLT QMRRIFIKRG NTARGYEEDR EVAETVRELD EHGKR

Supporting Peptides:

| Peptide               | Uniq | -10lgP | Mass      | Length | ppm | m/z      | z | RT    | Fraction | Scan     | Source File                                | Area ebraeus | Area judaeus | #Feature | #Feature ebraeus | #Feature judaeus | Start | End | PTM | AScore | Found By |
|-----------------------|------|--------|-----------|--------|-----|----------|---|-------|----------|----------|--------------------------------------------|--------------|--------------|----------|------------------|------------------|-------|-----|-----|--------|----------|
| R.SADVITALKPEPVLLQK.S | Y    | 98.74  | 1707.9771 | 16     | 2.5 | 854.9947 | 2 | 37.23 | 1        | F1:34574 | 20210611-08_2021021-OK192A_815_5.3.236.mgf | 0            |              | 0        | 0                | 0                | 10    | 25  |     |        | PEAKS DB |
| DGGALTER.R            | N    | 70.06  | 817.3929  | 8      | 1.7 | 409.7029 | 2 | 14.28 | 1        | F1:5430  | 20210611-08_2021021-OK192A_815_5.3.236.mgf | 0            | 0            | 0        | 0                | 0                | 1     | 8   |     |        | PEAKS DB |
| total 2 peptides      |      |        |           |        |     |          |   |       |          |          |                                            |              |              |          |                  |                  |       |     |     |        |          |

OK213\_E\_008\_B1

[back to list](#)

| [Protein Coverage](#) | [Supporting Peptides](#) |

Protein Coverage:

1 DGGALTERRS ADVTALKPEP VLLQKSAARS TSDNGKDRLT QMKRTLKRG NVATDREEIL ETIREL NESG KR

Supporting Peptides:

| Peptide               | Uniq | -10lgP | Mass      | Length | ppm | m/z      | z | RT    | Fraction | Scan     | Source File                                | Area ebraeus | Area judaeus | #Feature | #Feature ebraeus | #Feature judaeus | Start | End | PTM | AScore | Found By |
|-----------------------|------|--------|-----------|--------|-----|----------|---|-------|----------|----------|--------------------------------------------|--------------|--------------|----------|------------------|------------------|-------|-----|-----|--------|----------|
| R.SADVITALKPEPVLLQK.S | Y    | 98.74  | 1707.9771 | 16     | 2.5 | 854.9947 | 2 | 37.23 | 1        | F1:34574 | 20210611-08_2021021-OK192A_815_5.3.236.mgf | 0            |              | 0        | 0                | 0                | 10    | 25  |     |        | PEAKS DB |
| DGGALTER.R            | N    | 70.06  | 817.3929  | 8      | 1.7 | 409.7029 | 2 | 14.28 | 1        | F1:5430  | 20210611-08_2021021-OK192A_815_5.3.236.mgf | 0            | 0            | 0        | 0                | 0                | 1     | 8   |     |        | PEAKS DB |
| total 2 peptides      |      |        |           |        |     |          |   |       |          |          |                                            |              |              |          |                  |                  |       |     |     |        |          |

SRX1323887\_E\_010\_B1

[back to list](#)

| [Protein Coverage](#) | [Supporting Peptides](#) |

Protein Coverage:

1 DGGALTERRS ADVTALKPEP VLLQKSAARS TSDNGKDRLT QMRRIFIKRG NTARGYEDDA EDVEYIGDLE EL

Supporting Peptides:

| Peptide              | Uniq | -10lgP | Mass      | Length | ppm | m/z      | z | RT    | Fraction | Scan     | Source File                                | Area ebraeus | Area judaeus | #Feature | #Feature ebraeus | #Feature judaeus | Start | End | PTM | AScore | Found By |
|----------------------|------|--------|-----------|--------|-----|----------|---|-------|----------|----------|--------------------------------------------|--------------|--------------|----------|------------------|------------------|-------|-----|-----|--------|----------|
| R.SADVTALKPEPVLLQK.S | Y    | 98.74  | 1707.9771 | 16     | 2.5 | 854.9947 | 2 | 37.23 | 1        | F1:34574 | 20210611-08_2021021-OK192A_815_5.3.236.mgf | 0            |              | 0        | 0                | 0                | 10    | 25  |     |        | PEAKS DB |
| DGGALTER.R           | N    | 70.06  | 817.3929  | 8      | 1.7 | 409.7029 | 2 | 14.28 | 1        | F1:5430  | 20210611-08_2021021-OK192A_815_5.3.236.mgf | 0            | 0            | 0        | 0                | 0                | 1     | 8   |     |        | PEAKS DB |
| total 2 peptides     |      |        |           |        |     |          |   |       |          |          |                                            |              |              |          |                  |                  |       |     |     |        |          |

OK193\_E\_008\_B1

[back to list](#)

| [Protein Coverage](#) | [Supporting Peptides](#) |

Protein Coverage:

1 **DGGALTER**<sup>1</sup><sub>6</sub>**S** **ADV**TALK**PEP** **VLLQK**<sup>1</sup><sub>6</sub>SAARS TSDNGKDRLT QMRRIFIKRG NTARGYEDDA EDVEYIGDLE EL

Supporting Peptides:

| Peptide              | Uniq | -10lgP | Mass      | Length | ppm | m/z      | z | RT    | Fraction | Scan     | Source File                                | Area ebraeus | Area judaeus | #Feature | #Feature ebraeus | #Feature judaeus | Start | End | PTM | AScore | Found By |
|----------------------|------|--------|-----------|--------|-----|----------|---|-------|----------|----------|--------------------------------------------|--------------|--------------|----------|------------------|------------------|-------|-----|-----|--------|----------|
| R.SADVTALKPEPVLLQK.S | Y    | 98.74  | 1707.9771 | 16     | 2.5 | 854.9947 | 2 | 37.23 | 1        | F1:34574 | 20210611-08_2021021-OK192A_815_5.3.236.mgf | 0            |              | 0        | 0                | 0                | 10    | 25  |     |        | PEAKS DB |
| DGGALTER.R           | N    | 70.06  | 817.3929  | 8      | 1.7 | 409.7029 | 2 | 14.28 | 1        | F1:5430  | 20210611-08_2021021-OK192A_815_5.3.236.mgf | 0            | 0            | 0        | 0                | 0                | 1     | 8   |     |        | PEAKS DB |
| total 2 peptides     |      |        |           |        |     |          |   |       |          |          |                                            |              |              |          |                  |                  |       |     |     |        |          |

OK213\_E\_010\_B1

[back to list](#)

| [Protein Coverage](#) | [Supporting Peptides](#) |

Protein Coverage:

1 **DGGALTER**<sup>1</sup><sub>6</sub>**S** **ADV**TALK**PEP** **VLLQK**<sup>1</sup><sub>6</sub>SAARS TSDNGKDRLT QMRRIFIKRG NTARGYEDDA EDVEYIGDLE EL

Supporting Peptides:

| Peptide              | Uniq | -10lgP | Mass      | Length | ppm | m/z      | z | RT    | Fraction | Scan     | Source File                                | Area ebraeus | Area judaeus | #Feature | #Feature ebraeus | #Feature judaeus | Start | End | PTM | AScore | Found By |
|----------------------|------|--------|-----------|--------|-----|----------|---|-------|----------|----------|--------------------------------------------|--------------|--------------|----------|------------------|------------------|-------|-----|-----|--------|----------|
| R.SADVTALKPEPVLLQK.S | Y    | 98.74  | 1707.9771 | 16     | 2.5 | 854.9947 | 2 | 37.23 | 1        | F1:34574 | 20210611-08_2021021-OK192A_815_5.3.236.mgf | 0            |              | 0        | 0                | 0                | 10    | 25  |     |        | PEAKS DB |
| DGGALTER.R           | N    | 70.06  | 817.3929  | 8      | 1.7 | 409.7029 | 2 | 14.28 | 1        | F1:5430  | 20210611-08_2021021-OK192A_815_5.3.236.mgf | 0            | 0            | 0        | 0                | 0                | 1     | 8   |     |        | PEAKS DB |
| total 2 peptides     |      |        |           |        |     |          |   |       |          |          |                                            |              |              |          |                  |                  |       |     |     |        |          |

CebrOK014\_E\_003\_B1

[back to list](#)

| [Protein Coverage](#) | [Supporting Peptides](#) |

Protein Coverage:

1 **DGGALTER**<sup>1</sup><sub>6</sub>**S** **ADV**TALK**PEP** **VLLQK**<sup>1</sup><sub>6</sub>SAARS TSDNGKDRLT QMRRIFIKRG NTARGYEDDA EDVEYIGDLE EL

Supporting Peptides:

| Peptide              | Uniq | -10lgP | Mass      | Length | ppm | m/z      | z | RT    | Fraction | Scan     | Source File                                | Area ebraeus | Area judaeus | #Feature | #Feature ebraeus | #Feature judaeus | Start | End | PTM | AScore | Found By |
|----------------------|------|--------|-----------|--------|-----|----------|---|-------|----------|----------|--------------------------------------------|--------------|--------------|----------|------------------|------------------|-------|-----|-----|--------|----------|
| R.SADVTALKPEPVLLQK.S | Y    | 98.74  | 1707.9771 | 16     | 2.5 | 854.9947 | 2 | 37.23 | 1        | F1:34574 | 20210611-08_2021021-OK192A_815_5.3.236.mgf | 0            |              | 0        | 0                | 0                | 10    | 25  |     |        | PEAKS DB |
| DGGALTER.R           | N    | 70.06  | 817.3929  | 8      | 1.7 | 409.7029 | 2 | 14.28 | 1        | F1:5430  | 20210611-08_2021021-OK192A_815_5.3.236.mgf | 0            | 0            | 0        | 0                | 0                | 1     | 8   |     |        | PEAKS DB |
| total 2 peptides     |      |        |           |        |     |          |   |       |          |          |                                            |              |              |          |                  |                  |       |     |     |        |          |

OK193\_E\_026\_Conkunitzin

[back to list](#)

| [Protein Coverage](#) | [Supporting Peptides](#) |

Protein Coverage:

1 <sup>1</sup><sub>6</sub>**CYEPLDSGDS** **R**RGPTQSTR**FY** **YNQEK**<sup>1</sup><sub>6</sub>KKCQT FQCTECGGNG NNFPDLYACK ECCEWDMTCY Carbamidomethylation (+57.02)

Supporting Peptides:

| Peptide               | Uniq | -10lgP | Mass      | Length | ppm | m/z      | z | RT    | Fraction | Scan     | Source File                                | Area ebraeus | Area judaeus | #Feature | #Feature ebraeus | #Feature judaeus | Start | End | PTM                  | AScore                           | Found By |
|-----------------------|------|--------|-----------|--------|-----|----------|---|-------|----------|----------|--------------------------------------------|--------------|--------------|----------|------------------|------------------|-------|-----|----------------------|----------------------------------|----------|
| C(+57.02)YEPLDSGDSR.G | Y    | 97.67  | 1297.5244 | 11     | 0.9 | 649.7676 | 2 | 22.26 | 1        | F1:14164 | 20210611-08_2021021-OK192A_815_5.3.236.mgf | 0            |              | 0        | 0                | 0                | 1     | 11  | Carbamidomethylation | C1:Carbamidomethylation:10 00.00 | PEAKS DB |
| R.FYYNQEK.K           | Y    | 61.64  | 990.4446  | 7      | 1.4 | 496.2284 | 2 | 20.07 | 1        | F1:11498 | 20210611-08_2021021-OK192A_815_5.3.236.mgf | 0            | 0            | 0        | 0                | 0                | 19    | 25  |                      |                                  | PEAKS DB |
| total 2 peptides      |      |        |           |        |     |          |   |       |          |          |                                            |              |              |          |                  |                  |       |     |                      |                                  |          |

OK006\_E\_028\_Conkunitzin

[back to list](#)

| [Protein Coverage](#) | [Supporting Peptides](#) |

Protein Coverage:

1 <sup>1</sup><sub>6</sub>**CYEPLDSGDS** **R**RGPTQSTR**FY** **YNQEK**<sup>1</sup><sub>6</sub>KKCQT FQCTECGGNG NNFPDLYACK ECCEWDMTCY Carbamidomethylation (+57.02)

Supporting Peptides:

| Peptide               | Uniq | -10lgP | Mass      | Length | ppm | m/z      | z | RT    | Fraction | Scan     | Source File                                | Area ebraeus | Area judaeus | #Feature | #Feature ebraeus | #Feature judaeus | Start | End | PTM                  | AScore                           | Found By |
|-----------------------|------|--------|-----------|--------|-----|----------|---|-------|----------|----------|--------------------------------------------|--------------|--------------|----------|------------------|------------------|-------|-----|----------------------|----------------------------------|----------|
| C(+57.02)YEPLDSGDSR.G | Y    | 97.67  | 1297.5244 | 11     | 0.9 | 649.7676 | 2 | 22.26 | 1        | F1:14164 | 20210611-08_2021021-OK192A_815_5.3.236.mgf | 0            |              | 0        | 0                | 0                | 1     | 11  | Carbamidomethylation | C1:Carbamidomethylation:10 00.00 | PEAKS DB |
| R.FYYNQEK.K           | Y    | 61.64  | 990.4446  | 7      | 1.4 | 496.2284 | 2 | 20.07 | 1        | F1:11498 | 20210611-08_2021021-OK192A_815_5.3.236.mgf | 0            | 0            | 0        | 0                | 0                | 19    | 25  |                      |                                  | PEAKS DB |
| total 2 peptides      |      |        |           |        |     |          |   |       |          |          |                                            |              |              |          |                  |                  |       |     |                      |                                  |          |

SRX1323887\_E\_026\_Conkunitzin

[back to list](#)

| [Protein Coverage](#) | [Supporting Peptides](#) |

Protein Coverage:

1 <sup>1</sup><sub>6</sub>**CYEPLDSGDS** **R**RGPTQSTR**FY** **YNQEK**<sup>1</sup><sub>6</sub>KKCQT FQCTECGGNG NNFPDLYACK ECCEWDMTCY Carbamidomethylation (+57.02)

Supporting Peptides:

| Peptide               | Uniq | -10lgP | Mass      | Length | ppm | m/z      | z | RT    | Fraction | Scan     | Source File                                | Area ebraeus | Area judaeus | #Feature | #Feature ebraeus | #Feature judaeus | Start | End | PTM                  | AScore                           | Found By |
|-----------------------|------|--------|-----------|--------|-----|----------|---|-------|----------|----------|--------------------------------------------|--------------|--------------|----------|------------------|------------------|-------|-----|----------------------|----------------------------------|----------|
| C(+57.02)YEPLDSGDSR.G | Y    | 97.67  | 1297.5244 | 11     | 0.9 | 649.7676 | 2 | 22.26 | 1        | F1:14164 | 20210611-08_2021021-OK192A_815_5.3.236.mgf | 0            |              | 0        | 0                | 0                | 1     | 11  | Carbamidomethylation | C1:Carbamidomethylation:10 00.00 | PEAKS DB |
| R.FYYNQEK.K           | Y    | 61.64  | 990.4446  | 7      | 1.4 | 496.2284 | 2 | 20.07 | 1        | F1:11498 | 20210611-08_2021021-OK192A_815_5.3.236.mgf | 0            | 0            | 0        | 0                | 0                | 19    | 25  |                      |                                  | PEAKS DB |
| total 2 peptides      |      |        |           |        |     |          |   |       |          |          |                                            |              |              |          |                  |                  |       |     |                      |                                  |          |

OK213\_E\_030\_Conkunitzin

[back to list](#)

| [Protein Coverage](#) | [Supporting Peptides](#) |

Protein Coverage:

1

1

C

1

C

YEPLDSGDS

R

RGPTQSTR

FY

YNQEK

KKCQT

FQCTECGGNG

NNFPDLYACK

ECCEWDMTCY

Carbamidomethylation (+57.02)

Supporting Peptides:

| Peptide                | Uniq | -10lgP | Mass      | Length | ppm | m/z      | z | RT    | Fraction | Scan     | Source File                                | Area ebraeus | Area judaeus | #Feature | #Feature ebraeus | #Feature judaeus | Start | End | PTM                  | AScore                         | Found By |
|------------------------|------|--------|-----------|--------|-----|----------|---|-------|----------|----------|--------------------------------------------|--------------|--------------|----------|------------------|------------------|-------|-----|----------------------|--------------------------------|----------|
| C(+57.02)YEPLDSGDS.R.G | Y    | 97.67  | 1297.5244 | 11     | 0.9 | 649.7676 | 2 | 22.26 | 1        | F1:14164 | 20210611-08_2021021-OK192A_815_5.3.236.mgf | 0            |              | 0        | 0                | 0                | 1     | 11  | Carbamidomethylation | C1:Carbamidomethylation:100.00 | PEAKS DB |
| R.FYYNQEK.K            | Y    | 61.64  | 990.4446  | 7      | 1.4 | 496.2284 | 2 | 20.07 | 1        | F1:11498 | 20210611-08_2021021-OK192A_815_5.3.236.mgf | 0            |              | 0        | 0                | 0                | 19    | 25  |                      |                                | PEAKS DB |
| total 2 peptides       |      |        |           |        |     |          |   |       |          |          |                                            |              |              |          |                  |                  |       |     |                      |                                |          |

gene:107288180

[back to list](#)

| [Protein Coverage](#) | [Supporting Peptides](#) |

Protein Coverage:

1

MMRKNYRNTS

STVRSFSSRS

SGPVASSRIS

TSYSSAGSGF

GGSRYGGGAS

FRGTSAGSLG

GITAVSVNKS

LLAPLNLEID

81

PAIQQVRIKE

KEEIKTLNKK

FANLIDKVRF

LEQQNKMLET

KWSLLQNQKT

TRSNMDSMFE

AYINNLRRLQ

ENLGQERARL

161

DAELGNMQGL

VEEFKNKYED

EINHRTKEN

EFVLLKKDVD

EAYMNKVELE

SRMECLTDEI

NFLRQFYDEE

LRVLQSQISD

241

TSVILSMDNN

RSLDLGIIIT

DVK

AQYEEIA

NR

SRRAEAERM

YQIKYEELQT

VAGKHGDDLRL

STKNEINELS

RMNRIQSEI

321

DGLKGQRASL

EAAITEAEER

GELAVKDANN

KLAELESAMQ

RAKQDMARQL

REYQELLNTK

LALDIEIATY

R

KLLEGEEIR

401

LESQMQLNSI

QTKTTGYSGG

LSSGFGSYGG

GYNSSYSSGG

YSMNMLPMES

SAISKTKAIV

IKKIETRDGK

LVSESSDVL

481

K

Supporting Peptides:

| Peptide          | Uniq | -10lgP | Mass      | Length | ppm | m/z      | z | RT    | Fraction | Scan     | Source File                                | Area ebraeus | Area judaeus | #Feature | #Feature ebraeus | #Feature judaeus | Start | End | PTM | AScore | Found By |
|------------------|------|--------|-----------|--------|-----|----------|---|-------|----------|----------|--------------------------------------------|--------------|--------------|----------|------------------|------------------|-------|-----|-----|--------|----------|
| K.LALDIEIATYR.K  | Y    | 89.70  | 1276.7026 | 11     | 1.5 | 639.3571 | 2 | 48.56 | 1        | F1:46398 | 20210611-08_2021021-OK192A_815_5.3.236.mgf | 0            | 0            | 0        | 0                | 0                | 381   | 391 |     |        | PEAKS DB |
| K.AQYEEIANR.S    | Y    | 77.22  | 1092.5199 | 9      | 4.7 | 547.2675 | 2 | 19.94 | 2        | F2:65984 | 20210611-09_2021021-OK160A_816_5.3.236.mgf | 0            | 0            | 0        | 0                | 0                | 264   | 272 |     |        | PEAKS DB |
| total 2 peptides |      |        |           |        |     |          |   |       |          |          |                                            |              |              |          |                  |                  |       |     |     |        |          |

OK212\_J\_025\_Conkunitzin

[back to list](#)

| [Protein Coverage](#) | [Supporting Peptides](#) |

Protein Coverage:

1

15

C

SLPAVCLQPV

VVGPCAASLQ

R

YYFNHHYDI

CQPFVYGGCN

GNGNRFITMA

ACVNTCKSPS

VAIVVD

Carbamidomethylation (+57.02)

Supporting Peptides:

| Peptide                                 | Uniq | -10lgP | Mass      | Length | ppm  | m/z       | z | RT    | Fraction | Scan      | Source File                                | Area ebraeus | Area judaeus | #Feature | #Feature ebraeus | #Feature judaeus | Start | End | PTM                  | AS                                                         |  |
|-----------------------------------------|------|--------|-----------|--------|------|-----------|---|-------|----------|-----------|--------------------------------------------|--------------|--------------|----------|------------------|------------------|-------|-----|----------------------|------------------------------------------------------------|--|
| SLPAVC(+57.02)LQPVVVGPC(+57.02)AASLQR.Y | Y    | 127.65 | 2221.1711 | 21     | 12.2 | 1111.6017 | 2 | 49.19 | 2        | F2:117561 | 20210611-09_2021021-OK160A_816_5.3.236.mgf |              | 0            | 0        | 0                | 0                | 1     | 21  | Carbamidomethylation | C6<br>ba<br>me<br>ati<br>00<br>C1<br>rb<br>or<br>lat<br>00 |  |
| total 1 peptides                        |      |        |           |        |      |           |   |       |          |           |                                            |              |              |          |                  |                  |       |     |                      |                                                            |  |

OK212\_J\_026\_Conkunitzin

[back to list](#)

| [Protein Coverage](#) | [Supporting Peptides](#) |

Protein Coverage:

1

15

C

SLPAVCLQPV

VVGPCAASLQ

R

YYFNHHFDI

CQPFVYGGCN

GNGNRFITMA

ACVNTCKSPS

VAIVVD

Carbamidomethylation (+57.02)

Supporting Peptides:

| Peptide                                 | Uniq | -10lgP | Mass      | Length | ppm  | m/z       | z | RT    | Fraction | Scan      | Source File                                | Area ebraeus | Area judaeus | #Feature | #Feature ebraeus | #Feature judaeus | Start | End | PTM                  | AS                                                          |  |
|-----------------------------------------|------|--------|-----------|--------|------|-----------|---|-------|----------|-----------|--------------------------------------------|--------------|--------------|----------|------------------|------------------|-------|-----|----------------------|-------------------------------------------------------------|--|
| SLPAVC(+57.02)LQPVVVGPC(+57.02)AASLQR.Y | Y    | 127.65 | 2221.1711 | 21     | 12.2 | 1111.6017 | 2 | 49.19 | 2        | F2:117561 | 20210611-09_2021021-OK160A_816_5.3.236.mgf |              | 0            | 0        | 0                | 0                | 1     | 21  | Carbamidomethylation | C6<br>ba<br>me<br>ati<br>00<br>C1<br>rbu<br>on<br>lat<br>00 |  |
| total 1 peptides                        |      |        |           |        |      |           |   |       |          |           |                                            |              |              |          |                  |                  |       |     |                      |                                                             |  |

gene:107288688

[back to list](#)

| [Protein Coverage](#) | [Supporting Peptides](#) |

Protein Coverage:

1

MAAIRKKLVI

VGDGACGKTC

LLIVFSKDQF

PEVYPTVFE

NYVADIEVDG

KQVELALWDT

AGQEDYDR

LR

PLSPYPTDVI

81

LMCFSIDSPD

SLENIPEKWT

PEVKHFCPNV

PIILVGNKKD

LRNDEHTRRE

LAKMKQEPVK

PEEGR

DMANR

IGAFGYMECS

161

AKTKDGVREV

FEMATRAALQ

ARRGKKKSGC

LLL

Supporting Peptides:

| Peptide                  | Uniq | -10lgP | Mass      | Length | ppm | m/z       | z | RT    | Fraction | Scan      | Source File                                | Area ebraeus | Area judaeus | #Feature | #Feature ebraeus | #Feature judaeus | Start | End | PTM           | AScore                   | Found By |
|--------------------------|------|--------|-----------|--------|-----|-----------|---|-------|----------|-----------|--------------------------------------------|--------------|--------------|----------|------------------|------------------|-------|-----|---------------|--------------------------|----------|
| K.M(+15.99)KQEPVKPEEGR.D | Y    | 85.52  | 1442.7188 | 12     | 1.1 | 481.9120  | 3 | 9.69  | 2        | F2:52973  | 20210611-09_2021021-OK160A_816_5.3.236.mgf | 0            | 0            | 0        | 0                | 0                | 134   | 145 | Oxidation (M) | M1:Oxidation (M):1000.00 | PEAKS DB |
| K.QVELALWDTAGQEDYDR.L    | Y    | 75.66  | 2007.9174 | 17     | 3.0 | 1004.9647 | 2 | 47.26 | 2        | F2:114052 | 20210611-09_2021021-OK160A_816_5.3.236.mgf | 0            | 0            | 0        | 0                | 0                | 52    | 68  |               |                          | PEAKS DB |
| total 2 peptides         |      |        |           |        |     |           |   |       |          |           |                                            |              |              |          |                  |                  |       |     |               |                          |          |

Pvau2\_22

[back to list](#)

| [Protein Coverage](#) | [Supporting Peptides](#) |

Protein Coverage:

1 NLTAMHWNT LAGYCPKPYS QFCRKLSAFL TKNMQWMEQ IRHDKGGNLH LPYWHHVLEF LYQAAGLADG LSGNEKSPNL  
81 DIDPMGFFLF QVGGDIEDLE SVLGDSSTQH PLGAGHCSAL VKLLPGNKDL YVSQDTWDVF PSMLRLIKVY DFPWKTASE  
161 TETMAGSVQA FSSYPGTIMS GDDYYLMSSG MVSMTTIGN SNSSLWK**FVT PSSVLEGIRC** IVANRLAKSG AEWASIFSQY  
241 NSGTYNNEWM LVDYKRFPQG MSKLPPGVLT VLDQIPGMIO WADLTELLVN QGYFPSYNVA YFPEIFNASG NQPLVEK**YGN**  
321 **WFTYDK**TPRA LIYKRDHVKV KDLNSMMKLM RYNDFQHDPL SRCNCTPPYS GENAISARSD LNPKDGTYPF SSLGHRMHGG  
401 IDMKLTSSSEL FKGLNFVAVG GPTWDQQPPF QWSKSDFSNV SHIGQPD LWK FSPILFNATQ IFGRP

Supporting Peptides:

| Peptide          | Uniq | -10lgP | Mass      | Length | ppm  | m/z      | z | RT    | Fraction | Scan      | Source File                                | Area ebraeus | Area judaeus | #Feature | #Feature ebraeus | #Feature judaeus | Start | End | PTM | AScore | Found By |
|------------------|------|--------|-----------|--------|------|----------|---|-------|----------|-----------|--------------------------------------------|--------------|--------------|----------|------------------|------------------|-------|-----|-----|--------|----------|
| K.FVTPSSVLEGIR.C | Y    | 79.82  | 1303.7136 | 12     | -2.0 | 652.8600 | 2 | 47.38 | 2        | F2:114202 | 20210611-09_2021021-OK160A_816_5.3.236.mgf |              | 0            | 0        | 0                | 0                | 208   | 219 |     |        | PEAKS DB |
| K.YGNWFTYDK.T    | Y    | 65.79  | 1192.5189 | 9      | -1.8 | 597.2632 | 2 | 38.54 | 2        | F2:98999  | 20210611-09_2021021-OK160A_816_5.3.236.mgf |              | 0            | 0        | 0                | 0                | 318   | 326 |     |        | PEAKS DB |
| total 2 peptides |      |        |           |        |      |          |   |       |          |           |                                            |              |              |          |                  |                  |       |     |     |        |          |

gene:107294617

[back to list](#)

| [Protein Coverage](#) | [Supporting Peptides](#) |

Protein Coverage:

1 MKQLWGLGLL CLLLLAASAQ AEEDVDVGT V EDDLKGSREG SRTDDEVVQR EEESIQLDGL NASQIKQLRE KSERFAFQAE  
81 VNRMKKLIIN SLYKNKEIFL RELISNASDA LDKIRLMSLT DETALSDNEE LTIIKIKDKE KNMLHVIDTG IGMTKDELIK  
161 NLGTIAKSGT SEFLNKISEM QEENQSTSEL IGQFGVGFYS AFLVADKVIV TSKHNDSQQ IWESDSNEFS VIEDPRGNTL  
241 GRGTTVTVLV KEEASDYLEL DTVKNLVTKY SQFINFPIYV WSSKTETVEE PLEDEEVKDK DETDDEAAVE EEEEEKKPKT  
321 KPVQKTVDWV ELMNDIKPIW QRPKSVEEED EYKAFYKFS KETDEPMTYI HFTAEGEVTF KSILFIPSTA PRGLFDEYGS  
401 KKSDFIKLYV RRVFITDDFH DMPFKYLFV **KGVVDSDDL****P LNVSR**ETLQQ HKLLKVIRKK LVRKTLDMIK KIAEEKYNDT  
481 FWKEFGTNIK LGVIEDHSNR TRLAKLLRFQ SSNHESNTTS LDQYVERMKE KQDKIYFMAG SSRKEAESSP FVERLLKKG Y  
561 EVIYLTEPVD EYCIQALPEF DNKRQFNQVAK EGVKFDESEK SKEAHEALEK EYEPLLTWMK DKALKDKIEK AVLSQRLTQS  
641 PCALVASQYG WSGNMERIMK AQAYQTGKDI ATNYYASQKK IFEINPKHPL IKDMLRRVQE NEDDQIVADL AVVLELATL  
721 RSGYLLPDTK EYGERIERML RLSLNIDPEE KVEDEPEEPE EADEEVEPEE EIEADEDIED SETEKTESTD GKDEL

Supporting Peptides:

| Peptide          | Uniq | -10lgP | Mass      | Length | ppm | m/z      | z | RT    | Fraction | Scan     | Source File                                | Area ebraeus | Area judaeus | #Feature | #Feature ebraeus | #Feature judaeus | Start | End | PTM | AScore | Found By |
|------------------|------|--------|-----------|--------|-----|----------|---|-------|----------|----------|--------------------------------------------|--------------|--------------|----------|------------------|------------------|-------|-----|-----|--------|----------|
| K.GVVDSDDLNVSR.E | Y    | 111.81 | 1484.7471 | 14     | 0.6 | 743.3784 | 2 | 39.08 | 1        | F1:36637 | 20210611-08_2021021-OK192A_815_5.3.236.mgf | 0            | 0            | 0        | 0                | 0                | 432   | 445 |     |        | PEAKS DB |
| total 1 peptides |      |        |           |        |     |          |   |       |          |          |                                            |              |              |          |                  |                  |       |     |     |        |          |

P\_027D\_029\_Neuroendocrine

[back to list](#)

| [Protein Coverage](#) | [Supporting Peptides](#) |

Protein Coverage:

1 MVKKYVVVTV VVIAAALLR VDPADGKEDE SRYLNEWAVE IEGGLNHARS VAERHGFELL GQMPFLDNHF IVRHVDVPMR  
81 SKRSADQHTT RLTEDSEVKW AEQQVVRARS KRGYADNSPP LLLPMAPEET KTCANTRLR YNDPDYPCQW YMVGDDEHEY  
161 TSNVIKWKVQ KITGRGVVVC VVDGLEHNH TDLFPNYDPY ASWDLNSNDS DMPHYNEME TNRHGTRCAG EISMAADNGK  
241 CGVGIAFNSK IGGIRLDDGN VTRLEADAL SFNTHIDIV SLSWGPTDDG KTVCKPLRLV QTAMETAIQK GRGKGVIYT  
321 LASNGGGSN DDCNCDGYAS SLTYISVSV GRDGNKTSYG ECCASSLT TT YSSGTRGGVS VVSTDLHNEC TYHHSGTSAS  
401 APMASGFIAL ALEANPDLTW RDVQHLVVIT SRHDQLTKKG LYKNAANFCV NPAPFGFGLMD PLGMVKWAKI WKRVPKQRCV  
481 HSTPIVGTTS RANHWSRDVR SGSGVKVTFD VHNDCCPNNR TAINYLEHVQ FIFTMNYTTR GAISAYATSP SGTRTVLLSP  
561 RTRDNSTENF EDWPLMSVHT WGENPCGEWT FQVADEGSFG TNSGSLVDV **KMILYGTNTA PFYR**KYSTAY CALPTPSSTQ  
641 EVQTHKTGD FIPHYGMGLL KYLWFRDTE TNKSSE

Supporting Peptides:

| Peptide                   | Uniq | -10lgP | Mass      | Length | ppm  | m/z      | z | RT    | Fraction | Scan      | Source File                                | Area ebraeus | Area judaeus | #Feature | #Feature ebraeus | #Feature judaeus | Start | End | PTM | AScore                   | Found By |
|---------------------------|------|--------|-----------|--------|------|----------|---|-------|----------|-----------|--------------------------------------------|--------------|--------------|----------|------------------|------------------|-------|-----|-----|--------------------------|----------|
| K.MILYGTNTAPFYR.K         | Y    | 111.72 | 1545.7650 | 13     | 1.5  | 773.8877 | 2 | 43.58 | 2        | F2:107764 | 20210611-09_2021021-OK160A_816_5.3.236.mgf |              | 0            | 0        | 0                | 0                | 612   | 624 |     |                          | PEAKS DB |
| K.M(+15.99)ILYGTNTAPFYR.K | Y    | 98.71  | 1561.7599 | 13     | -1.7 | 781.8826 | 2 | 38.89 | 2        | F2:99620  | 20210611-09_2021021-OK160A_816_5.3.236.mgf |              | 0            | 0        | 0                | 0                | 612   | 624 |     | M1:Oxidation (M):1000.00 | PEAKS DB |
| total 2 peptides          |      |        |           |        |      |          |   |       |          |           |                                            |              |              |          |                  |                  |       |     |     |                          |          |

OK193\_E\_214\_Ggeo01

[back to list](#)

| [Protein Coverage](#) | [Supporting Peptides](#) |

Protein Coverage:

1 SQTDDSSTEK RSRSPMPDVF NLQFDK**IGDS SDFGQEF**PKG K

Supporting Peptides:

| Peptide           | Uniq | -10lgP | Mass      | Length | ppm | m/z      | z | RT    | Fraction | Scan     | Source File                                | Area ebraeus | Area judaeus | #Feature | #Feature ebraeus | #Feature judaeus | Start | End | PTM | AScore | Found By |
|-------------------|------|--------|-----------|--------|-----|----------|---|-------|----------|----------|--------------------------------------------|--------------|--------------|----------|------------------|------------------|-------|-----|-----|--------|----------|
| K.IGDSSDFGQEFPK.G | Y    | 108.40 | 1425.6411 | 13     | 2.1 | 713.8267 | 2 | 34.76 | 1        | F1:31556 | 20210611-08_2021021-OK192A_815_5.3.236.mgf | 0            |              | 0        | 0                | 0                | 27    | 39  |     |        | PEAKS DB |
| total 1 peptides  |      |        |           |        |     |          |   |       |          |          |                                            |              |              |          |                  |                  |       |     |     |        |          |

V\_CG13\_188\_D

[back to list](#)

| [Protein Coverage](#) | [Supporting Peptides](#) |

Protein Coverage:

1 **AVIAACH**<sup>S</sup>**PNN**<sub>C</sub> **PGSPWGR**CCT TVMCGSVCCN YAHCSCIYHK DRGHGDCD Carbamidomethylation (+57.02)

Supporting Peptides:

| Peptide                     | Uniq | -10lgP | Mass      | Length | ppm | m/z      | z | RT    | Fraction | Scan     | Source File                                | Area ebraeus | Area judaeus | #Feature | #Feature ebraeus | #Feature judaeus | Start | End | PTM                  | AScore                          | Found By |
|-----------------------------|------|--------|-----------|--------|-----|----------|---|-------|----------|----------|--------------------------------------------|--------------|--------------|----------|------------------|------------------|-------|-----|----------------------|---------------------------------|----------|
| AVIAAC(+57.02)HPNPPGSPWGR.C | Y    | 105.56 | 1802.8634 | 17     | 0.5 | 601.9598 | 3 | 28.41 | 1        | F1:22979 | 20210611-08_2021021-OK192A_815_5.3.236.mgf | 0            |              | 0        | 0                | 0                | 1     | 17  | Carbamidomethylation | C6:Carbamidomethylation:1000.00 | PEAKS DB |
| total 1 peptides            |      |        |           |        |     |          |   |       |          |          |                                            |              |              |          |                  |                  |       |     |                      |                                 |          |

OK193\_E\_115\_M

[back to list](#)

| [Protein Coverage](#) | [Supporting Peptides](#) |

Protein Coverage:

### Supporting Peptides:

[illegible]

**V\_CG13\_073\_Rimp**

[back to list](#)

[| Protein Coverage](#) | [Supporting Peptides](#) |

**Protein Coverage:**

1 AGIYYPPVEK PIGPCETNDI SKTEMYSNRF GRWESPYYIC TCAGGEEHFA ANDTITSYAT VSYRIYVCGA PTSPCSGAMI  
81 PVTDSNDGTR RMQCTCGQYK **YFVSNPLGWH VRC**

### Supporting Peptides:

[illegible]

OK213\_E\_049\_H

[back to list](#)

[| Protein Coverage](#) | [Supporting Peptides](#) |

### Protein Coverage:

1 HPIANDGDAT RNVGSDGISV ELPKMIERGQ DSGQEKSAH GRGIVYVYYA PDHDIPFP

### Supporting Peptides:

[illegible]

**A\_0025\_010\_60S**

[back to list](#)

[| Protein Coverage](#) | [Supporting Peptides](#) |

**Protein Coverage:**

1 AFHLRVLRLHP FHIIRINRML SCAGADRLQT GMR **GAFGKQ** **GTVAR** VHIGQ PIMSVRARE **EQ** **HEASIIIEALR** RAKFKYPGRQ  
81 KIVSVKKWGF TKWAREDYER MRAEGL

### Supporting Peptides:

[illegible]

**A\_1387\_362**

[back to list](#)| [Protein Coverage](#) | [Supporting Peptides](#) |

### Protein Coverage:

1 AFHLRVLRLHP FHIIRINKML SCAGADRLQT GMR**GAFGKPQ** GTVARVHIGQ PIMSVRARE**EQ** **HEASIIIEALR** RAKFKYPGRQ  
81 KIVVSKKWGF TKWAREDYER MRAEGL

### Supporting Peptides:

[illegible]

**A\_0885\_182\_60S**

[back to list](#)

[| Protein Coverage](#) | [Supporting Peptides](#) |

### Protein Coverage:

1 AFHLRVLRLHP FHIIRINKML SCAGADRLQT GMR**GAFGKPQ** **GTVAR**VHIGQ PIMSVRARE**EQ** **HEASIIIEALR** RAKFKYPGRQ  
81 KIVSVKKWGF TKWAREDYER MRAEGYL

### Supporting Peptides:

[illegible]

**A\_0055\_259\_60S**

[back to list](#)

[| Protein Coverage](#) | [Supporting Peptides](#) |

**Protein Coverage:**

1 AFHLRVLRLHP FHIIRINML SCAGADRLQT GMR**GAFGKQP GTVAR**VHIGQ PIMSVRARE**EQ HEASITIALR** RAKFKYPGRQ  
81 KIVSKKKGWFKTKWAREDYER MRAEGL

### Supporting Peptides:

| Peptide          | Uniq | -10lgP | Mass      | Length | ppm | m/z      | z | RT    | Fraction | Scan     | Source File                                | Area ebraeus | Area judeaus | #Feature | #Feature ebraeus | #Feature judeaus | Start | End | PTM | AScore | Found By |
|------------------|------|--------|-----------|--------|-----|----------|---|-------|----------|----------|--------------------------------------------|--------------|--------------|----------|------------------|------------------|-------|-----|-----|--------|----------|
| R.EQHEASIIIEAL.R | Y    | 69.77  | 1394.7153 | 12     | 0.5 | 465.9107 | 3 | 34.28 | 2        | F2:91188 | 20210611-09_2021021-OKJ60A_816_5.3.236.mgf |              | 0            | 0        | 0                | 0                | 59    | 70  |     |        | PEAKS_DB |

total 2 peptides



| Peptide          | Uniq | -10lgP | Mass      | Length | ppm | m/z      | z | RT    | Fraction | Scan     | Source File                                | Area ebraeus | Area judaeus | #Feature | #Feature ebraeus | #Feature judaeus | Start | End | PTM | AScore | Found By |
|------------------|------|--------|-----------|--------|-----|----------|---|-------|----------|----------|--------------------------------------------|--------------|--------------|----------|------------------|------------------|-------|-----|-----|--------|----------|
| R.GAFGKPQGTVAR.V | Y    | 66.31  | 1187.6411 | 12     | 4.3 | 396.8877 | 3 | 16.39 | 2        | F2:60763 | 20210611-09_2021021-OK160A_816_5.3.236.mgf |              | 0            | 0        | 0                | 0                | 34    | 45  |     |        | PEAKS DB |
| total 2 peptides |      |        |           |        |     |          |   |       |          |          |                                            |              |              |          |                  |                  |       |     |     |        |          |

A\_0520\_023\_60S

[back to list](#)

| [Protein Coverage](#) | [Supporting Peptides](#) |

Protein Coverage:

- 1 AFHLRVLRLHP FHIIRINKML SCAGADRLQT GMRGAFGKPQ GTVARVHIGQ PIMSVRAREQ HEASIIIEALR RAKFKYPGRQ
- 81 KIVVSKKWGF TKWAREDYER MRAEGYL

Supporting Peptides:

| Peptide           | Uniq | -10lgP | Mass      | Length | ppm | m/z      | z | RT    | Fraction | Scan     | Source File                                | Area ebraeus | Area judaeus | #Feature | #Feature ebraeus | #Feature judaeus | Start | End | PTM | AScore | Found By |
|-------------------|------|--------|-----------|--------|-----|----------|---|-------|----------|----------|--------------------------------------------|--------------|--------------|----------|------------------|------------------|-------|-----|-----|--------|----------|
| R.EQHEASIIIEALR.R | Y    | 69.77  | 1394.7153 | 12     | 0.5 | 465.9107 | 3 | 34.28 | 2        | F2:91188 | 20210611-09_2021021-OK160A_816_5.3.236.mgf |              | 0            | 0        | 0                | 0                | 59    | 70  |     |        | PEAKS DB |
| R.GAFGKPQGTVAR.V  | Y    | 66.31  | 1187.6411 | 12     | 4.3 | 396.8877 | 3 | 16.39 | 2        | F2:60763 | 20210611-09_2021021-OK160A_816_5.3.236.mgf |              | 0            | 0        | 0                | 0                | 34    | 45  |     |        | PEAKS DB |
| total 2 peptides  |      |        |           |        |     |          |   |       |          |          |                                            |              |              |          |                  |                  |       |     |     |        |          |

A\_0048\_318\_60S

[back to list](#)

| [Protein Coverage](#) | [Supporting Peptides](#) |

Protein Coverage:

- 1 AFHLRVLRLHP FHIIRINKML SCAGADRLQT GMRGAFGKPQ GTVARVHIGQ PIMSVRAREQ HEASIIIEALR RAKFKYPGRQ
- 81 KIVVSKKWGF TKWAREDYER MRAEGYL

Supporting Peptides:

| Peptide           | Uniq | -10lgP | Mass      | Length | ppm | m/z      | z | RT    | Fraction | Scan     | Source File                                | Area ebraeus | Area judaeus | #Feature | #Feature ebraeus | #Feature judaeus | Start | End | PTM | AScore | Found By |
|-------------------|------|--------|-----------|--------|-----|----------|---|-------|----------|----------|--------------------------------------------|--------------|--------------|----------|------------------|------------------|-------|-----|-----|--------|----------|
| R.EQHEASIIIEALR.R | Y    | 69.77  | 1394.7153 | 12     | 0.5 | 465.9107 | 3 | 34.28 | 2        | F2:91188 | 20210611-09_2021021-OK160A_816_5.3.236.mgf |              | 0            | 0        | 0                | 0                | 59    | 70  |     |        | PEAKS DB |
| R.GAFGKPQGTVAR.V  | Y    | 66.31  | 1187.6411 | 12     | 4.3 | 396.8877 | 3 | 16.39 | 2        | F2:60763 | 20210611-09_2021021-OK160A_816_5.3.236.mgf |              | 0            | 0        | 0                | 0                | 34    | 45  |     |        | PEAKS DB |
| total 2 peptides  |      |        |           |        |     |          |   |       |          |          |                                            |              |              |          |                  |                  |       |     |     |        |          |

A\_0031\_033\_60S

[back to list](#)

| [Protein Coverage](#) | [Supporting Peptides](#) |

Protein Coverage:

- 1 AFHLRVLRLHP FHIIRINKML SCAGADRLQT GMRGAFGKPQ GTVARVHIGQ PIMSVRAREQ HEASIIIEALR RAKFKYPGRQ
- 81 KIVVSKKWGF TKWAREDYER MRAEGYL

Supporting Peptides:

| Peptide           | Uniq | -10lgP | Mass      | Length | ppm | m/z      | z | RT    | Fraction | Scan     | Source File                                | Area ebraeus | Area judaeus | #Feature | #Feature ebraeus | #Feature judaeus | Start | End | PTM | AScore | Found By |
|-------------------|------|--------|-----------|--------|-----|----------|---|-------|----------|----------|--------------------------------------------|--------------|--------------|----------|------------------|------------------|-------|-----|-----|--------|----------|
| R.EQHEASIIIEALR.R | Y    | 69.77  | 1394.7153 | 12     | 0.5 | 465.9107 | 3 | 34.28 | 2        | F2:91188 | 20210611-09_2021021-OK160A_816_5.3.236.mgf |              | 0            | 0        | 0                | 0                | 59    | 70  |     |        | PEAKS DB |
| R.GAFGKPQGTVAR.V  | Y    | 66.31  | 1187.6411 | 12     | 4.3 | 396.8877 | 3 | 16.39 | 2        | F2:60763 | 20210611-09_2021021-OK160A_816_5.3.236.mgf |              | 0            | 0        | 0                | 0                | 34    | 45  |     |        | PEAKS DB |
| total 2 peptides  |      |        |           |        |     |          |   |       |          |          |                                            |              |              |          |                  |                  |       |     |     |        |          |

A\_0855\_173\_60S

[back to list](#)

| [Protein Coverage](#) | [Supporting Peptides](#) |

Protein Coverage:

- 1 AFHLRVLRLHP FHIIRINKML SCAGADRLQT GMRGAFGKPQ GTVARVHIGQ PIMSVRAREQ HEASIIIEALR RAKFKYPGRQ
- 81 KIVVSKKWGF TKWAREDYER MRAEGYL

Supporting Peptides:

| Peptide           | Uniq | -10lgP | Mass      | Length | ppm | m/z      | z | RT    | Fraction | Scan     | Source File                                | Area ebraeus | Area judaeus | #Feature | #Feature ebraeus | #Feature judaeus | Start | End | PTM | AScore | Found By |
|-------------------|------|--------|-----------|--------|-----|----------|---|-------|----------|----------|--------------------------------------------|--------------|--------------|----------|------------------|------------------|-------|-----|-----|--------|----------|
| R.EQHEASIIIEALR.R | Y    | 69.77  | 1394.7153 | 12     | 0.5 | 465.9107 | 3 | 34.28 | 2        | F2:91188 | 20210611-09_2021021-OK160A_816_5.3.236.mgf |              | 0            | 0        | 0                | 0                | 59    | 70  |     |        | PEAKS DB |
| R.GAFGKPQGTVAR.V  | Y    | 66.31  | 1187.6411 | 12     | 4.3 | 396.8877 | 3 | 16.39 | 2        | F2:60763 | 20210611-09_2021021-OK160A_816_5.3.236.mgf |              | 0            | 0        | 0                | 0                | 34    | 45  |     |        | PEAKS DB |
| total 2 peptides  |      |        |           |        |     |          |   |       |          |          |                                            |              |              |          |                  |                  |       |     |     |        |          |

K\_0010\_065\_60S

[back to list](#)

| [Protein Coverage](#) | [Supporting Peptides](#) |

Protein Coverage:

- 1 AFHLRVLRLHP FHIIRINKML SCAGADRLQT GMRGAFGKPQ GTVARVHIGQ PIMSVRAREQ HEASIIIEALR RAKFKYPGRQ
- 81 KIVVSKKWGF TKWPREDYER MRAEGYL

Supporting Peptides:

| Peptide           | Uniq | -10lgP | Mass      | Length | ppm | m/z      | z | RT    | Fraction | Scan     | Source File                                | Area ebraeus | Area judaeus | #Feature | #Feature ebraeus | #Feature judaeus | Start | End | PTM | AScore | Found By |
|-------------------|------|--------|-----------|--------|-----|----------|---|-------|----------|----------|--------------------------------------------|--------------|--------------|----------|------------------|------------------|-------|-----|-----|--------|----------|
| R.EQHEASIIIEALR.R | Y    | 69.77  | 1394.7153 | 12     | 0.5 | 465.9107 | 3 | 34.28 | 2        | F2:91188 | 20210611-09_2021021-OK160A_816_5.3.236.mgf |              | 0            | 0        | 0                | 0                | 59    | 70  |     |        | PEAKS DB |
| R.GAFGKPQGTVAR.V  | Y    | 66.31  | 1187.6411 | 12     | 4.3 | 396.8877 | 3 | 16.39 | 2        | F2:60763 | 20210611-09_2021021-OK160A_816_5.3.236.mgf |              | 0            | 0        | 0                | 0                | 34    | 45  |     |        | PEAKS DB |
| total 2 peptides  |      |        |           |        |     |          |   |       |          |          |                                            |              |              |          |                  |                  |       |     |     |        |          |

A\_0239\_021\_60S

[back to list](#)

| [Protein Coverage](#) | [Supporting Peptides](#) |

Protein Coverage:

- 1 AFHLRVLRLHP FHIIRINKML SCAGADRLQT GMRGAFGKPQ GTVARVHIGQ PIMSVRAREQ HEASIIIEALR RAKFKYPGRQ
- 81 KIVVSKKWGF TKWAREDYER MRAEGYL

Supporting Peptides:

| Peptide           | Uniq | -10lgP | Mass      | Length | ppm | m/z      | z | RT    | Fraction | Scan     | Source File                                | Area ebraeus | Area judaeus | #Feature | #Feature ebraeus | #Feature judaeus | Start | End | PTM | AScore | Found By |
|-------------------|------|--------|-----------|--------|-----|----------|---|-------|----------|----------|--------------------------------------------|--------------|--------------|----------|------------------|------------------|-------|-----|-----|--------|----------|
| R.EQHEASIIIEALR.R | Y    | 69.77  | 1394.7153 | 12     | 0.5 | 465.9107 | 3 | 34.28 | 2        | F2:91188 | 20210611-09_2021021-OK160A_816_5.3.236.mgf |              | 0            | 0        | 0                | 0                | 59    | 70  |     |        | PEAKS DB |
| R.GAFGKPQGTVAR.V  | Y    | 66.31  | 1187.6411 | 12     | 4.3 | 396.8877 | 3 | 16.39 | 2        | F2:60763 | 20210611-09_2021021-OK160A_816_5.3.236.mgf |              | 0            | 0        | 0                | 0                | 34    | 45  |     |        | PEAKS DB |
| total 2 peptides  |      |        |           |        |     |          |   |       |          |          |                                            |              |              |          |                  |                  |       |     |     |        |          |

A\_0875\_147\_60S

[back to list](#)

| [Protein Coverage](#) | [Supporting Peptides](#) |

Protein Coverage:

1 AFHLRVLRLHP FHIIRINKML SCAGADRLQT GMR**GAFGKPQ GTVAR**VHIGQ PIMSVRARE**EQ HEASIIEARL** RAKFKYPGRQ

81 KIVVSKKWGF TKWAREDYER MRAEGYL

Supporting Peptides:

| Peptide          | Uniq | -10lgP | Mass      | Length | ppm | m/z      | z | RT    | Fraction | Scan     | Source File                                | Area ebraeus | Area judaeus | #Feature | #Feature ebraeus | #Feature judaeus | Start | End | PTM | AScore | Found By |
|------------------|------|--------|-----------|--------|-----|----------|---|-------|----------|----------|--------------------------------------------|--------------|--------------|----------|------------------|------------------|-------|-----|-----|--------|----------|
| R.EQHEASIIEARL.R | Y    | 69.77  | 1394.7153 | 12     | 0.5 | 465.9107 | 3 | 34.28 | 2        | F2:91188 | 20210611-09_2021021-OK160A_816_5.3.236.mgf |              | 0            | 0        | 0                | 0                | 59    | 70  |     |        | PEAKS DB |
| R.GAFGKPQGTVAR.V | Y    | 66.31  | 1187.6411 | 12     | 4.3 | 396.8877 | 3 | 16.39 | 2        | F2:60763 | 20210611-09_2021021-OK160A_816_5.3.236.mgf |              | 0            | 0        | 0                | 0                | 34    | 45  |     |        | PEAKS DB |

total 2 peptides

A\_0039\_214\_60S

[back to list](#)

| [Protein Coverage](#) | [Supporting Peptides](#) |

Protein Coverage:

1 AFHLRVLRLHP FHIIRINKML SCAGADRLQT GMR**GAFGKPQ GTVAR**VHIGQ PIMSVRARE**EQ HEASIIEARL** RAKFKYPGRQ

81 KIVVSKKWGF TKWAREDYER MRAEGYL

Supporting Peptides:

| Peptide          | Uniq | -10lgP | Mass      | Length | ppm | m/z      | z | RT    | Fraction | Scan     | Source File                                | Area ebraeus | Area judaeus | #Feature | #Feature ebraeus | #Feature judaeus | Start | End | PTM | AScore | Found By |
|------------------|------|--------|-----------|--------|-----|----------|---|-------|----------|----------|--------------------------------------------|--------------|--------------|----------|------------------|------------------|-------|-----|-----|--------|----------|
| R.EQHEASIIEARL.R | Y    | 69.77  | 1394.7153 | 12     | 0.5 | 465.9107 | 3 | 34.28 | 2        | F2:91188 | 20210611-09_2021021-OK160A_816_5.3.236.mgf |              | 0            | 0        | 0                | 0                | 59    | 70  |     |        | PEAKS DB |
| R.GAFGKPQGTVAR.V | Y    | 66.31  | 1187.6411 | 12     | 4.3 | 396.8877 | 3 | 16.39 | 2        | F2:60763 | 20210611-09_2021021-OK160A_816_5.3.236.mgf |              | 0            | 0        | 0                | 0                | 34    | 45  |     |        | PEAKS DB |

total 2 peptides

OK212\_J\_022\_Con-ikot-ikot

[back to list](#)

| [Protein Coverage](#) | [Supporting Peptides](#) |

Protein Coverage:

1 <sup>3</sup>**LEC**<sup>33</sup>**PPPSHGQ NR**DRSSRKCC AVKSYQCLRD <sup>33</sup>**R**<sup>3</sup>**GCFNPNVNSK** CAEPCKTTDT TSCGSTTGDN CCSIYKSCLV ECQIAHGDQR Carbamidomethylation (+57.02)

81 EDQLLCCYNI CDQSYPC

Supporting Peptides:

| Peptide                | Uniq | -10lgP | Mass      | Length | ppm | m/z      | z | RT    | Fraction | Scan     | Source File                                | Area ebraeus | Area judaeus | #Feature | #Feature ebraeus | #Feature judaeus | Start | End | PTM                  | AScore                          | Found By |
|------------------------|------|--------|-----------|--------|-----|----------|---|-------|----------|----------|--------------------------------------------|--------------|--------------|----------|------------------|------------------|-------|-----|----------------------|---------------------------------|----------|
| R.GC(+57.02)FNPVNSK.C  | Y    | 70.61  | 1021.4651 | 9      | 5.1 | 511.7403 | 2 | 20.01 | 2        | F2:66038 | 20210611-09_2021021-OK160A_816_5.3.236.mgf |              | 0            | 0        | 0                | 0                | 32    | 40  | Carbamidomethylation | C2:Carbamidomethylation:1000.00 | PEAKS DB |
| LEC(+57.02)PPPSHGQNR.D | Y    | 63.83  | 1390.6411 | 12     | 0.4 | 464.5526 | 3 | 11.89 | 2        | F2:54854 | 20210611-09_2021021-OK160A_816_5.3.236.mgf |              | 0            | 0        | 0                | 0                | 1     | 12  | Carbamidomethylation | C3:Carbamidomethylation:1000.00 | PEAKS DB |

total 2 peptides

OK214\_J\_017\_Con-ikot-ikot

[back to list](#)

| [Protein Coverage](#) | [Supporting Peptides](#) |

Protein Coverage:

1 <sup>3</sup>**LEC**<sup>33</sup>**PPPSHGQ NR**DRSSRKCC AVKSYQCLRD <sup>33</sup>**R**<sup>3</sup>**GCFNPNVNSK** CAEPCKTTDT TSCGSTTGDN CCSIYKSCLV ECQIAHGDQR Carbamidomethylation (+57.02)

81 EDQLLCCYNI CDQSYPC

Supporting Peptides:

| Peptide                | Uniq | -10lgP | Mass      | Length | ppm | m/z      | z | RT    | Fraction | Scan     | Source File                                | Area ebraeus | Area judaeus | #Feature | #Feature ebraeus | #Feature judaeus | Start | End | PTM                  | AScore                          | Found By |
|------------------------|------|--------|-----------|--------|-----|----------|---|-------|----------|----------|--------------------------------------------|--------------|--------------|----------|------------------|------------------|-------|-----|----------------------|---------------------------------|----------|
| R.GC(+57.02)FNPVNSK.C  | Y    | 70.61  | 1021.4651 | 9      | 5.1 | 511.7403 | 2 | 20.01 | 2        | F2:66038 | 20210611-09_2021021-OK160A_816_5.3.236.mgf |              | 0            | 0        | 0                | 0                | 32    | 40  | Carbamidomethylation | C2:Carbamidomethylation:1000.00 | PEAKS DB |
| LEC(+57.02)PPPSHGQNR.D | Y    | 63.83  | 1390.6411 | 12     | 0.4 | 464.5526 | 3 | 11.89 | 2        | F2:54854 | 20210611-09_2021021-OK160A_816_5.3.236.mgf |              | 0            | 0        | 0                | 0                | 1     | 12  | Carbamidomethylation | C3:Carbamidomethylation:1000.00 | PEAKS DB |

total 2 peptides

CebrOK035\_J\_031\_Con-ikot-ikot

[back to list](#)

| [Protein Coverage](#) | [Supporting Peptides](#) |

Protein Coverage:

1 <sup>3</sup>**LEC**<sup>33</sup>**PPPSHGQ NR**DRSSRKCC AVKSYQCLRD <sup>33</sup>**R**<sup>3</sup>**GCFNPNVNSK** CAEPCKTTDT TSCGSTTGDN CCSIYKSCLV ECQIAHGDQR Carbamidomethylation (+57.02)

81 EDQLLCCYNI CDQSYPC

Supporting Peptides:

| Peptide                | Uniq | -10lgP | Mass      | Length | ppm | m/z      | z | RT    | Fraction | Scan     | Source File                                | Area ebraeus | Area judaeus | #Feature | #Feature ebraeus | #Feature judaeus | Start | End | PTM                  | AScore                          | Found By |
|------------------------|------|--------|-----------|--------|-----|----------|---|-------|----------|----------|--------------------------------------------|--------------|--------------|----------|------------------|------------------|-------|-----|----------------------|---------------------------------|----------|
| R.GC(+57.02)FNPVNSK.C  | Y    | 70.61  | 1021.4651 | 9      | 5.1 | 511.7403 | 2 | 20.01 | 2        | F2:66038 | 20210611-09_2021021-OK160A_816_5.3.236.mgf |              | 0            | 0        | 0                | 0                | 32    | 40  | Carbamidomethylation | C2:Carbamidomethylation:1000.00 | PEAKS DB |
| LEC(+57.02)PPPSHGQNR.D | Y    | 63.83  | 1390.6411 | 12     | 0.4 | 464.5526 | 3 | 11.89 | 2        | F2:54854 | 20210611-09_2021021-OK160A_816_5.3.236.mgf |              | 0            | 0        | 0                | 0                | 1     | 12  | Carbamidomethylation | C3:Carbamidomethylation:1000.00 | PEAKS DB |

total 2 peptides

OK214\_J\_018\_Con-ikot-ikot

[back to list](#)

| [Protein Coverage](#) | [Supporting Peptides](#) |

Protein Coverage:

1 <sup>3</sup>**LEC**<sup>33</sup>**PPPSHGQ NR**DRSSRKCC AVKSYQCLRD <sup>33</sup>**R**<sup>3</sup>**GCFNPNVNSK** CAEPCKTTDT TSCGSTTGDN CCSIYKSCLV ECQIAHGDQR Carbamidomethylation (+57.02)

81 EDQLLCCYNI CDQSCITYT

Supporting Peptides:

| Peptide               | Uniq | -10lgP | Mass      | Length | ppm | m/z      | z | RT    | Fraction | Scan     | Source File                                | Area ebraeus | Area judaeus | #Feature | #Feature ebraeus | #Feature judaeus | Start | End | PTM                  | AScore                          | Found By |
|-----------------------|------|--------|-----------|--------|-----|----------|---|-------|----------|----------|--------------------------------------------|--------------|--------------|----------|------------------|------------------|-------|-----|----------------------|---------------------------------|----------|
| R.GC(+57.02)FNPVNSK.C | Y    | 70.61  | 1021.4651 | 9      | 5.1 | 511.7403 | 2 | 20.01 | 2        | F2:66038 | 20210611-09_2021021-OK160A_816_5.3.236.mgf |              | 0            | 0        | 0                | 0                | 32    | 40  | Carbamidomethylation | C2:Carbamidomethylation:1000.00 | PEAKS DB |

total 2 peptides



| [Protein Coverage](#) | [Supporting Peptides](#) |

Protein Coverage:

1

QFECVEGGEN CRADSNCCSR

2223

CC

VCCQLSTGK

CC

39

C

QTVGCD

C

CAFK

39

C

DIHLN

C

☒ Carbamidomethylation (+57.02)

Supporting Peptides:

| Peptide                       | Uniq | -10lgP | Mass      | Length | ppm | m/z      | z | RT    | Fraction | Scan     | Source File                                | Area ebraeus | Area judaeus | #Feature | #Feature ebraeus | #Feature judaeus | Start | End | PTM                  | AScore                                                                  | Found By |
|-------------------------------|------|--------|-----------|--------|-----|----------|---|-------|----------|----------|--------------------------------------------|--------------|--------------|----------|------------------|------------------|-------|-----|----------------------|-------------------------------------------------------------------------|----------|
| K.QTVGC(+57.02)DDIHLN         | Y    | 71.49  | 1270.5612 | 11     | 2.9 | 636.2873 | 2 | 28.23 | 1        | F1:22885 | 20210611-08_2021021-OK192A_815_5.3.236.mgf | 0            |              | 0        | 0                | 0                | 35    | 45  | Carbamidomethylation | C5:Carb amidom ethylatio n:1000.0 0                                     | PEAKS DB |
| R.VC(+57.02)C(+57.02)QLSTGK.R | Y    | 53.95  | 1051.4790 | 9      | 0.2 | 526.7449 | 2 | 15.04 | 1        | F1:6163  | 20210611-08_2021021-OK192A_815_5.3.236.mgf | 0            |              | 0        | 0                | 0                | 21    | 29  | Carbamidomethylation | C2:Carb amidom ethylatio n:1000.0 0;C3:Car bamido methylat ion:100 0.00 | PEAKS DB |

total 2 peptides

| [Protein Coverage](#) | [Supporting Peptides](#) |

Protein Coverage:

1

QFECVEGGEN CRADSNCCSR

2223

CC

VCCQLSTGK

CC

39

C

QTVGCD

C

CAFK

39

C

DIHLN

C

☒ Carbamidomethylation (+57.02)

Supporting Peptides:

| Peptide                       | Uniq | -10lgP | Mass      | Length | ppm | m/z      | z | RT    | Fraction | Scan     | Source File                                | Area ebraeus | Area judaeus | #Feature | #Feature ebraeus | #Feature judaeus | Start | End | PTM                  | AScore                                                                  | Found By |
|-------------------------------|------|--------|-----------|--------|-----|----------|---|-------|----------|----------|--------------------------------------------|--------------|--------------|----------|------------------|------------------|-------|-----|----------------------|-------------------------------------------------------------------------|----------|
| K.QTVGC(+57.02)DDIHLN         | Y    | 71.49  | 1270.5612 | 11     | 2.9 | 636.2873 | 2 | 28.23 | 1        | F1:22885 | 20210611-08_2021021-OK192A_815_5.3.236.mgf | 0            |              | 0        | 0                | 0                | 35    | 45  | Carbamidomethylation | C5:Carb amidom ethylatio n:1000.0 0                                     | PEAKS DB |
| R.VC(+57.02)C(+57.02)QLSTGK.R | Y    | 53.95  | 1051.4790 | 9      | 0.2 | 526.7449 | 2 | 15.04 | 1        | F1:6163  | 20210611-08_2021021-OK192A_815_5.3.236.mgf | 0            |              | 0        | 0                | 0                | 21    | 29  | Carbamidomethylation | C2:Carb amidom ethylatio n:1000.0 0;C3:Car bamido methylat ion:100 0.00 | PEAKS DB |

total 2 peptides

| [Protein Coverage](#) | [Supporting Peptides](#) |

Protein Coverage:

1

QFKCVEGGEN CRADSNCCSR

2223

CC

VCCQLSTGK

CC

39

C

QTVGCD

C

CAFK

39

C

DIHLN

C

☒ Carbamidomethylation (+57.02)

Supporting Peptides:

| Peptide                       | Uniq | -10lgP | Mass      | Length | ppm | m/z      | z | RT    | Fraction | Scan     | Source File                                | Area ebraeus | Area judaeus | #Feature | #Feature ebraeus | #Feature judaeus | Start | End | PTM                  | AScore                                                                  | Found By |
|-------------------------------|------|--------|-----------|--------|-----|----------|---|-------|----------|----------|--------------------------------------------|--------------|--------------|----------|------------------|------------------|-------|-----|----------------------|-------------------------------------------------------------------------|----------|
| K.QTVGC(+57.02)DDIHLN         | Y    | 71.49  | 1270.5612 | 11     | 2.9 | 636.2873 | 2 | 28.23 | 1        | F1:22885 | 20210611-08_2021021-OK192A_815_5.3.236.mgf | 0            |              | 0        | 0                | 0                | 35    | 45  | Carbamidomethylation | C5:Carb amidom ethylatio n:1000.0 0                                     | PEAKS DB |
| R.VC(+57.02)C(+57.02)QLSTGK.R | Y    | 53.95  | 1051.4790 | 9      | 0.2 | 526.7449 | 2 | 15.04 | 1        | F1:6163  | 20210611-08_2021021-OK192A_815_5.3.236.mgf | 0            |              | 0        | 0                | 0                | 21    | 29  | Carbamidomethylation | C2:Carb amidom ethylatio n:1000.0 0;C3:Car bamido methylat ion:100 0.00 | PEAKS DB |

total 2 peptides

| [Protein Coverage](#) | [Supporting Peptides](#) |

Protein Coverage:

1

QFKCVEGGEN CRADSNCCSR

2223

CC

VCCQLSTGK

CC

39

C

QTVGCD

C

CAFK

39

C

DIHLN

C

☒ Carbamidomethylation (+57.02)

Supporting Peptides:

| Peptide                       | Uniq | -10lgP | Mass      | Length | ppm | m/z      | z | RT    | Fraction | Scan     | Source File                                | Area ebraeus | Area judaeus | #Feature | #Feature ebraeus | #Feature judaeus | Start | End | PTM                  | AScore                                                                  | Found By |
|-------------------------------|------|--------|-----------|--------|-----|----------|---|-------|----------|----------|--------------------------------------------|--------------|--------------|----------|------------------|------------------|-------|-----|----------------------|-------------------------------------------------------------------------|----------|
| K.QTVGC(+57.02)DDIHLN         | Y    | 71.49  | 1270.5612 | 11     | 2.9 | 636.2873 | 2 | 28.23 | 1        | F1:22885 | 20210611-08_2021021-OK192A_815_5.3.236.mgf | 0            |              | 0        | 0                | 0                | 35    | 45  | Carbamidomethylation | C5:Carb amidom ethylatio n:1000.0 0                                     | PEAKS DB |
| R.VC(+57.02)C(+57.02)QLSTGK.R | Y    | 53.95  | 1051.4790 | 9      | 0.2 | 526.7449 | 2 | 15.04 | 1        | F1:6163  | 20210611-08_2021021-OK192A_815_5.3.236.mgf | 0            |              | 0        | 0                | 0                | 21    | 29  | Carbamidomethylation | C2:Carb amidom ethylatio n:1000.0 0;C3:Car bamido methylat ion:100 0.00 | PEAKS DB |

total 2 peptides

| [Protein Coverage](#) | [Supporting Peptides](#) |

Protein Coverage:

1

RLTLVLCLLL LLLLTQACF IRNCPKGGKR DVDERQLVHA CMFCSEFGQCV GPHICCGDGG CQMGTPEANR

CSQEDESPII

81

CRVIGNHCSL NNPNIGHGC VAYGICCVDD TCTTHSGCL

Supporting Peptides:

| Peptide                          | Uniq | -10lgP | Mass      | Length | ppm | m/z      | z | RT    | Fraction | Scan     | Source File                                | Area ebraeus | Area judaeus | #Feature | #Feature ebraeus | #Feature judaeus | Start | End | PTM                                                                 | AScore | Found By |
|----------------------------------|------|--------|-----------|--------|-----|----------|---|-------|----------|----------|--------------------------------------------|--------------|--------------|----------|------------------|------------------|-------|-----|---------------------------------------------------------------------|--------|----------|
| R.C(+57.02)SQEDESPIPC(+57.02)R.V | Y    | 98.21  | 1476.5973 | 12     | 1.0 | 739.3036 | 2 | 21.86 | 2        | F2:69231 | 20210611-09_2021021-OK160A_816_5.3.236.mgf |              | 0            | 0        | 0                | 0                | 71    | 82  | C1:Carbamidomethyla tion:1000.00;C11:Car bamidomethylation:10 00.00 |        | PEAKS DB |

total 1 peptides

[back to list](#)

### Protein Coverage:

### Supporting Peptides:

**total 1 peptides**

[back to list](#)

### Protein Coverage:

### Supporting Peptides:

**total 2 peptides**

[back to list](#)

### Protein Coverage:

### Supporting Peptides:

**total 2 peptides**

[back to list](#)

### Protein Coverage:

### Supporting Peptides:

**total 1 peptides**

[back to list](#)

### Protein Coverage:

### Supporting Peptides:

**total 1 peptides**

[back to list](#)

### Protein Coverage:

### Supporting Peptides:

**total 1 peptides**

[back to list](#)

### Protein Coverage:

### Supporting Peptides:

**total 2 peptides**

| Peptide          | Uniq | -10lgP | Mass      | Length | ppm  | m/z      | z | RT    | Fraction | Scan     | Source File                                | Area ebraeus | Area judaeus | #Feature | #Feature ebraeus | #Feature judaeus | Start | End | PTM | AScore | Found By |
|------------------|------|--------|-----------|--------|------|----------|---|-------|----------|----------|--------------------------------------------|--------------|--------------|----------|------------------|------------------|-------|-----|-----|--------|----------|
| K.GLLSAVVQNLDK.I | Y    | 57.90  | 1255.7136 | 12     | -0.1 | 628.8616 | 2 | 50.98 | 1        | F1:47930 | 20210611-08_2021021-OK192A_815_5.3.236.mgf | 0            |              | 0        | 0                | 0                | 13    | 24  |     |        | PEAKS DB |
| total 2 peptides |      |        |           |        |      |          |   |       |          |          |                                            |              |              |          |                  |                  |       |     |     |        |          |

V\_1302\_153\_T-3

back to list

| [Protein Coverage](#) | [Supporting Peptides](#) |

Protein Coverage:

1 AGLEDAGAKF EKGLLSAVVQ NLDKIGGTAT KVCCYFTKTC CPGDDE

Supporting Peptides:

| Peptide          | Uniq | -10lgP | Mass      | Length | ppm  | m/z      | z | RT    | Fraction | Scan     | Source File                                | Area ebraeus | Area judaeus | #Feature | #Feature ebraeus | #Feature judaeus | Start | End | PTM | AScore | Found By |
|------------------|------|--------|-----------|--------|------|----------|---|-------|----------|----------|--------------------------------------------|--------------|--------------|----------|------------------|------------------|-------|-----|-----|--------|----------|
| AGLEDAGAK.F      | Y    | 60.70  | 830.4133  | 9      | 3.6  | 416.2139 | 2 | 14.24 | 1        | F1:5438  | 20210611-08_2021021-OK192A_815_5.3.236.mgf | 0            |              | 0        | 0                | 0                | 1     | 9   |     |        | PEAKS DB |
| K.GLLSAVVQNLDK.I | Y    | 57.90  | 1255.7136 | 12     | -0.1 | 628.8616 | 2 | 50.98 | 1        | F1:47930 | 20210611-08_2021021-OK192A_815_5.3.236.mgf | 0            |              | 0        | 0                | 0                | 13    | 24  |     |        | PEAKS DB |
| total 2 peptides |      |        |           |        |      |          |   |       |          |          |                                            |              |              |          |                  |                  |       |     |     |        |          |

V\_1302\_154\_T-3

back to list

| [Protein Coverage](#) | [Supporting Peptides](#) |

Protein Coverage:

1 AGLEDAGAKF EKGLLSAVVQ NLDKIGGTAT KVCCYFTTSC CPDDDE

Supporting Peptides:

| Peptide          | Uniq | -10lgP | Mass      | Length | ppm  | m/z      | z | RT    | Fraction | Scan     | Source File                                | Area ebraeus | Area judaeus | #Feature | #Feature ebraeus | #Feature judaeus | Start | End | PTM | AScore | Found By |
|------------------|------|--------|-----------|--------|------|----------|---|-------|----------|----------|--------------------------------------------|--------------|--------------|----------|------------------|------------------|-------|-----|-----|--------|----------|
| AGLEDAGAK.F      | Y    | 60.70  | 830.4133  | 9      | 3.6  | 416.2139 | 2 | 14.24 | 1        | F1:5438  | 20210611-08_2021021-OK192A_815_5.3.236.mgf | 0            |              | 0        | 0                | 0                | 1     | 9   |     |        | PEAKS DB |
| K.GLLSAVVQNLDK.I | Y    | 57.90  | 1255.7136 | 12     | -0.1 | 628.8616 | 2 | 50.98 | 1        | F1:47930 | 20210611-08_2021021-OK192A_815_5.3.236.mgf | 0            |              | 0        | 0                | 0                | 13    | 24  |     |        | PEAKS DB |
| total 2 peptides |      |        |           |        |      |          |   |       |          |          |                                            |              |              |          |                  |                  |       |     |     |        |          |

V\_1258\_144\_T-3

back to list

| [Protein Coverage](#) | [Supporting Peptides](#) |

Protein Coverage:

1 AGLEDAGAKF EKGLLSAVVQ NLDKIGGTAT KVCCYFTTSC CPDDDE

Supporting Peptides:

| Peptide          | Uniq | -10lgP | Mass      | Length | ppm  | m/z      | z | RT    | Fraction | Scan     | Source File                                | Area ebraeus | Area judaeus | #Feature | #Feature ebraeus | #Feature judaeus | Start | End | PTM | AScore | Found By |
|------------------|------|--------|-----------|--------|------|----------|---|-------|----------|----------|--------------------------------------------|--------------|--------------|----------|------------------|------------------|-------|-----|-----|--------|----------|
| AGLEDAGAK.F      | Y    | 60.70  | 830.4133  | 9      | 3.6  | 416.2139 | 2 | 14.24 | 1        | F1:5438  | 20210611-08_2021021-OK192A_815_5.3.236.mgf | 0            |              | 0        | 0                | 0                | 1     | 9   |     |        | PEAKS DB |
| K.GLLSAVVQNLDK.I | Y    | 57.90  | 1255.7136 | 12     | -0.1 | 628.8616 | 2 | 50.98 | 1        | F1:47930 | 20210611-08_2021021-OK192A_815_5.3.236.mgf | 0            |              | 0        | 0                | 0                | 13    | 24  |     |        | PEAKS DB |
| total 2 peptides |      |        |           |        |      |          |   |       |          |          |                                            |              |              |          |                  |                  |       |     |     |        |          |

V.CG13\_170\_T-3

back to list

| [Protein Coverage](#) | [Supporting Peptides](#) |

Protein Coverage:

1 AGLEDAGAKF EKGLLSAVVQ NLDKIGGTAT KVCCYFTTSC CPDDDE

Supporting Peptides:

| Peptide          | Uniq | -10lgP | Mass      | Length | ppm  | m/z      | z | RT    | Fraction | Scan     | Source File                                | Area ebraeus | Area judaeus | #Feature | #Feature ebraeus | #Feature judaeus | Start | End | PTM | AScore | Found By |
|------------------|------|--------|-----------|--------|------|----------|---|-------|----------|----------|--------------------------------------------|--------------|--------------|----------|------------------|------------------|-------|-----|-----|--------|----------|
| AGLEDAGAK.F      | Y    | 60.70  | 830.4133  | 9      | 3.6  | 416.2139 | 2 | 14.24 | 1        | F1:5438  | 20210611-08_2021021-OK192A_815_5.3.236.mgf | 0            |              | 0        | 0                | 0                | 1     | 9   |     |        | PEAKS DB |
| K.GLLSAVVQNLDK.I | Y    | 57.90  | 1255.7136 | 12     | -0.1 | 628.8616 | 2 | 50.98 | 1        | F1:47930 | 20210611-08_2021021-OK192A_815_5.3.236.mgf | 0            |              | 0        | 0                | 0                | 13    | 24  |     |        | PEAKS DB |
| total 2 peptides |      |        |           |        |      |          |   |       |          |          |                                            |              |              |          |                  |                  |       |     |     |        |          |

V.CG13\_174\_T-3

back to list

| [Protein Coverage](#) | [Supporting Peptides](#) |

Protein Coverage:

1 AGLEDAGAKF EKGLLSAVVQ NLDKIGGTAT KVCCFFTKSC CSDDDDE

Supporting Peptides:

| Peptide          | Uniq | -10lgP | Mass      | Length | ppm  | m/z      | z | RT    | Fraction | Scan     | Source File                                | Area ebraeus | Area judaeus | #Feature | #Feature ebraeus | #Feature judaeus | Start | End | PTM | AScore | Found By |
|------------------|------|--------|-----------|--------|------|----------|---|-------|----------|----------|--------------------------------------------|--------------|--------------|----------|------------------|------------------|-------|-----|-----|--------|----------|
| AGLEDAGAK.F      | Y    | 60.70  | 830.4133  | 9      | 3.6  | 416.2139 | 2 | 14.24 | 1        | F1:5438  | 20210611-08_2021021-OK192A_815_5.3.236.mgf | 0            |              | 0        | 0                | 0                | 1     | 9   |     |        | PEAKS DB |
| K.GLLSAVVQNLDK.I | Y    | 57.90  | 1255.7136 | 12     | -0.1 | 628.8616 | 2 | 50.98 | 1        | F1:47930 | 20210611-08_2021021-OK192A_815_5.3.236.mgf | 0            |              | 0        | 0                | 0                | 13    | 24  |     |        | PEAKS DB |
| total 2 peptides |      |        |           |        |      |          |   |       |          |          |                                            |              |              |          |                  |                  |       |     |     |        |          |

gene:107288629

back to list

| [Protein Coverage](#) | [Supporting Peptides](#) |

Protein Coverage:

1 MWCSPFRLRSP FVLGQCSPSR AQSALAQLKR LLEGELEGIR GAGTWKNERI ITSQQGPIN VEGSRGDILN FCANNYLGLS  
81 SHPEVIRAGH DALEKYGAGL SSVRFICGTQ NIHKDLEEKI ARFHQREDAI LYISCFDANA GIFEALLTPE DAILSDLELNH  
161 ASIIDGIRLC KANKYRYKHM DMQDLEVKLQ DAQKHRLRMV ATDGAFSMDG DIAPLKEICR LAQKYAFVF IDECHATGFL  
241 GPNGRGTDDEL LGVMDQVTII NSTLGKALGG AAGGYTTGPK ALVDLLRQRS RPYLFSNSLP PAVVGCASKA LDLLMESNAI  
  
321 AQSMAAKTSQ FRSKMAAAGF TISGNNHPIC PVMLGDARLA SVMADDILKR GIYVIGFSYP VVPKGKARIR VQISAVHSEE  
401 DIDRCVEAFI EVGRKHGALP

Supporting Peptides:

| Peptide           | Uniq | -10lgP | Mass      | Length | ppm | m/z      | z | RT    | Fraction | Scan     | Source File                                | Area ebraeus | Area judaeus | #Feature | #Feature ebraeus | #Feature judaeus | Start | End | PTM | AScore | Found By |
|-------------------|------|--------|-----------|--------|-----|----------|---|-------|----------|----------|--------------------------------------------|--------------|--------------|----------|------------------|------------------|-------|-----|-----|--------|----------|
| K.ALGAAGGYTTGPK.A | Y    | 86.87  | 1219.6196 | 14     | 2.4 | 610.8160 | 2 | 21.84 | 2        | F2:69280 | 20210611-09_2021021-OK160A_816_5.3.236.mgf |              | 0            | 0        | 0                | 0                | 267   | 280 |     |        | PEAKS DB |
| total 1 peptides  |      |        |           |        |     |          |   |       |          |          |                                            |              |              |          |                  |                  |       |     |     |        |          |

CebrOK035\_J\_218\_Q

back to list

| [Protein Coverage](#) | [Supporting Peptides](#) |

Protein Coverage:



**C** Carbamidomethylation (+57.02)

total 1 peptides

[back to list](#)

**c** Carbamidomethylation (+57.02)

total 1 peptides

[back to list](#)

|    |            |            |                  |                     |            |            |            |            |
|----|------------|------------|------------------|---------------------|------------|------------|------------|------------|
| 1  | MAVVAAVRGS | RGGRRFWFET | SRKTNFNWHS       | SSFISSTSPV          | TTKLFDIDGF | VESKSNIEWE | IYNPATNEV  | GRVPKATQNE |
| 61 | MEAAVASCKK | ALPSPWSEVY | LSRQQIFLRY       | QQLIKDNLKE          | ISKLITLQQG | KTLADAEQDV | FRGLQVVEHA | CSVTLSMLGE |
| 61 | TLPSITKDMD | TCTYRLPLGV | CAGIAPNFNP       | AMIPLWMFFM          | AMVCGNTFLM | KPSERVPGAL | MFLAQLLQDA | GAPDGTLNII |
| 61 | HGQHEAVTFI | CDHPDIKAI  | <b>FVGNLQYCE</b> | <b>IYERGS</b> KSHGK | RVQANMGAKN | HGVVMPDANK | ENTLNQLIGA | AFGAAGQRCM |
| 21 | ALSAAILVGE | SQKWLPPELV | KAKNLCVNAE       | DQPGADLGLP          | ISPQARERVC | QLTDSGAKEG | ANVLDDGRKV | RVKGFENGNF |
| 1  | VGPTILGKVK | PNMTRGQKEI | EGFVLVLVEA       | NLLDADIEMV          | NNPYRGNGTA | IFIDNGATAR | KYSHLVDVGQ | IGVNVPEIPV |
| 61 | LPMFSTGSR  | SNRFGDTNFI | GKQGVQFYTQ       | LKTVISQWKE          | EDATVTKPAV | VMPTMGAN   |            |            |

**total 1 peptides**

[back to list](#)

1 FFQRDGAPE NADPNLQPFQ GVIPNMQPMQ GMTGMPSPQF LFFNPNFAVG LKRENLEKRR HNQQFSDNNQ SPFGSEDDLD  
81 SFMNFMKENG NNLPPADVNS AATDLGHFEP SDENEAGKFR FFDKEQ

total 2 peptides

[back to list](#)

1 FFQRRDGAPA NVDENLQPFQG GVIPNMQPMQ GMTGMPSPQF LPFNPNFAVG LKRENLEKRR HNQQFSDDNQ SPFGSEDDLD  
 81 SFMNFMKENG NNLPFADVNS AATDLGHFEP SDENEAGKFR FFDKEQ

**total 2 peptides**

[back to list](#)

1 FPQRDGDGAPA NVDENLQPFQG GVIPNMQPMQ GMTGMPSPQF LFPNPNFAVG LKRENLEKRR HNQQFSDNNQ SPFGSEDDLD  
81 SFMNFMKENG NNLPPADVNS AATDLGHFEP SDENEAGKFR FFDKEQ

total 2 peptides

[illegible]

[back to list](#)

### Protein Coverage:

### Supporting Peptides:

**OK213\_E\_130\_M**

[back to list](#)

### Protein Coverage:

### Supporting Peptides:

**OK193\_E\_113\_M**

[back to list](#)

### Protein Coverage:

### Supporting Peptides:

**SRX1323887\_E\_086\_M**

[back to list](#)

### Protein Coverage:

### Supporting Peptides:

OK006\_E\_111\_M

[back to list](#)

### Protein Coverage:

### Supporting Peptides:

**SRX1323887\_E\_022\_Con-ikot-ikot**

[back to list](#)

### Protein Coverage:

### Supporting Peptides:

**OK193\_E\_023\_Con-ikot-ikot**

[back to list](#)

### Protein Coverage:

### Supporting Peptides:

| Peptide               | Uniq | ~10lgP | Mass      | Length | ppm | m/z      | z | RT    | Fraction | Scan     | Source File                                | Area<br>ebraeus | Area<br>judaeus | #Feature | #Feature<br>ebraeus | #Feature<br>judaeus | Start | End | PTM                  | AScore                          | Found<br>By |
|-----------------------|------|--------|-----------|--------|-----|----------|---|-------|----------|----------|--------------------------------------------|-----------------|-----------------|----------|---------------------|---------------------|-------|-----|----------------------|---------------------------------|-------------|
| K,C(+57.02):FEPIDYK.C | Y    | 82.56  | 1070.4742 | 8      | 4.6 | 536.2448 | 2 | 31.42 | 1        | F1:27261 | 20210611-08_2021021-OK192A_815_5.3.236.mgf | 0               |                 | 0        | 0                   | 0                   | 16    | 23  | Carbamidomethylation | C1:Carbamidomethylation:1000.00 | PEAKS<br>DB |
| total 1 peptides      |      |        |           |        |     |          |   |       |          |          |                                            |                 |                 |          |                     |                     |       |     |                      |                                 |             |

[back to list](#)

### Protein Coverage:

c Carbamidomethylation (+57.02)

[back to list](#)

### Protein Coverage:

**C** Carbamidomethylation (+57.02)

[back to list](#)

---

[illegible]

### Protein Coverage:

c Carbamidomethylation (+57.02)

[back to list](#)

### Protein Coverage:

[back to list](#)

---

|  |  |  |  |  |
|--|--|--|--|--|
|  |  |  |  |  |
|--|--|--|--|--|

### Protein Coverage:

[back to list](#)

#### 14.1010: CIGOTSA AVEL

---

### Protein Coverage:

[back to list](#)

3. NOT LBRVCS#100

---

### Protein Coverage:

Page 10 of 10

|  |  |
|--|--|
|  |  |
|  |  |
|  |  |

---

[back to list](#)

### Protein Coverage:

B1 RCQSFIYYGM GGNTNMFQHD WECQNECEL

[back to list](#)

### Protein Coverage:

11. DRY TENDED TECHNOLOGY RDE

[back to list](#)

### Protein Coverage:

61 VRIHEMSL

[back to list](#)

### Protein Coverage:

1. **BRIGITTEKES NEVEZŐDÉSI SZAKMAI VÉGZETTSÉGEK KÉPZŐKÉNTI KÉPZÉSEKNEK**

[back to list](#)

**Protein Coverage:**

Supporting Pentides:

| Peptide          | Uniq | -10lgP | Mass      | Length | ppm | m/z      | z | RT    | Fraction | Scan     | Source File                                | Area ebraeus | Area judaeus | #Feature | #Feature ebraeus | #Feature judaeus | Start | End | PTM | AScore | Found By |
|------------------|------|--------|-----------|--------|-----|----------|---|-------|----------|----------|--------------------------------------------|--------------|--------------|----------|------------------|------------------|-------|-----|-----|--------|----------|
| R.GDQVEDPLR.V    | Y    | 76.39  | 1027.4934 | 9      | 3.9 | 514.7540 | 2 | 24.34 | 1        | F1:17231 | 20210611-08_2021021-OK192A_815_5.3.236.mgf | 0            |              | 0        | 0                | 0                | 60    | 68  |     |        | PEAKS DB |
| total 1 peptides |      |        |           |        |     |          |   |       |          |          |                                            |              |              |          |                  |                  |       |     |     |        |          |

V\_1278\_027\_I1-1

back to list

| [Protein Coverage](#) | [Supporting Peptides](#) |

Protein Coverage:

|   |                       |                                                                          |              |                                          |
|---|-----------------------|--------------------------------------------------------------------------|--------------|------------------------------------------|
| 1 | QFSCSEAGET CMTYSSCCSR | <div><div>2223</div><div>CC</div><div>FCCEGSLGK</div><div>CC</div></div> | CARLSCDDIG V | <div>Carbamidomethylation (+57.02)</div> |
|---|-----------------------|--------------------------------------------------------------------------|--------------|------------------------------------------|

Supporting Peptides:

| Peptide                       | Uniq | -10lgP | Mass      | Length | ppm | m/z      | z | RT    | Fraction | Scan     | Source File                                | Area ebraeus | Area judaeus | #Feature | #Feature ebraeus | #Feature judaeus | Start | End | PTM                  | AScore                                                                  | Found By |
|-------------------------------|------|--------|-----------|--------|-----|----------|---|-------|----------|----------|--------------------------------------------|--------------|--------------|----------|------------------|------------------|-------|-----|----------------------|-------------------------------------------------------------------------|----------|
| R.FC(+57.02)C(+57.02)EGSLGK.R | Y    | 75.34  | 1056.4369 | 9      | 0.9 | 529.2242 | 2 | 19.81 | 1        | F1:11260 | 20210611-08_2021021-OK192A_815_5.3.236.mgf | 0            |              | 0        | 0                | 0                | 21    | 29  | Carbamidomethylation | C2:Carb amidome thylatio n:1000.0 0;C3:Car bamidom ethylatio n:1000.0 0 | PEAKS DB |
| total 1 peptides              |      |        |           |        |     |          |   |       |          |          |                                            |              |              |          |                  |                  |       |     |                      |                                                                         |          |

V\_1302\_121\_I1-1

back to list

| [Protein Coverage](#) | [Supporting Peptides](#) |

Protein Coverage:

|   |                       |                                                                          |              |                                          |
|---|-----------------------|--------------------------------------------------------------------------|--------------|------------------------------------------|
| 1 | QFGCSEAGET CMNYSSCCSR | <div><div>2223</div><div>CC</div><div>FCCEGSLGK</div><div>CC</div></div> | CARLNCDDID I | <div>Carbamidomethylation (+57.02)</div> |
|---|-----------------------|--------------------------------------------------------------------------|--------------|------------------------------------------|

Supporting Peptides:

| Peptide                       | Uniq | -10lgP | Mass      | Length | ppm | m/z      | z | RT    | Fraction | Scan     | Source File                                | Area ebraeus | Area judaeus | #Feature | #Feature ebraeus | #Feature judaeus | Start | End | PTM                  | AScore                                                                  | Found By |
|-------------------------------|------|--------|-----------|--------|-----|----------|---|-------|----------|----------|--------------------------------------------|--------------|--------------|----------|------------------|------------------|-------|-----|----------------------|-------------------------------------------------------------------------|----------|
| R.FC(+57.02)C(+57.02)EGSLGK.R | Y    | 75.34  | 1056.4369 | 9      | 0.9 | 529.2242 | 2 | 19.81 | 1        | F1:11260 | 20210611-08_2021021-OK192A_815_5.3.236.mgf | 0            |              | 0        | 0                | 0                | 21    | 29  | Carbamidomethylation | C2:Carb amidome thylatio n:1000.0 0;C3:Car bamidom ethylatio n:1000.0 0 | PEAKS DB |
| total 1 peptides              |      |        |           |        |     |          |   |       |          |          |                                            |              |              |          |                  |                  |       |     |                      |                                                                         |          |

V\_1258\_040\_I1-1

back to list

| [Protein Coverage](#) | [Supporting Peptides](#) |

Protein Coverage:

|   |                       |                                                                          |              |                                          |
|---|-----------------------|--------------------------------------------------------------------------|--------------|------------------------------------------|
| 1 | QFGCSEAGET CMNYSSCCSR | <div><div>2223</div><div>CC</div><div>FCCEGSLGK</div><div>CC</div></div> | CARLNCDDID I | <div>Carbamidomethylation (+57.02)</div> |
|---|-----------------------|--------------------------------------------------------------------------|--------------|------------------------------------------|

Supporting Peptides:

| Peptide                       | Uniq | -10lgP | Mass      | Length | ppm | m/z      | z | RT    | Fraction | Scan     | Source File                                | Area ebraeus | Area judaeus | #Feature | #Feature ebraeus | #Feature judaeus | Start | End | PTM                  | AScore                                                                  | Found By |
|-------------------------------|------|--------|-----------|--------|-----|----------|---|-------|----------|----------|--------------------------------------------|--------------|--------------|----------|------------------|------------------|-------|-----|----------------------|-------------------------------------------------------------------------|----------|
| R.FC(+57.02)C(+57.02)EGSLGK.R | Y    | 75.34  | 1056.4369 | 9      | 0.9 | 529.2242 | 2 | 19.81 | 1        | F1:11260 | 20210611-08_2021021-OK192A_815_5.3.236.mgf | 0            |              | 0        | 0                | 0                | 21    | 29  | Carbamidomethylation | C2:Carb amidome thylatio n:1000.0 0;C3:Car bamidom ethylatio n:1000.0 0 | PEAKS DB |
| total 1 peptides              |      |        |           |        |     |          |   |       |          |          |                                            |              |              |          |                  |                  |       |     |                      |                                                                         |          |

A\_0855\_013\_I1-1

back to list

| [Protein Coverage](#) | [Supporting Peptides](#) |

Protein Coverage:

|   |                       |                                                                          |              |                                          |
|---|-----------------------|--------------------------------------------------------------------------|--------------|------------------------------------------|
| 1 | QFGCSEAGET CKTYSSCCSR | <div><div>2223</div><div>CC</div><div>FCCEGSLGK</div><div>CC</div></div> | CARLSCDDIG V | <div>Carbamidomethylation (+57.02)</div> |
|---|-----------------------|--------------------------------------------------------------------------|--------------|------------------------------------------|

Supporting Peptides:

| Peptide                       | Uniq | -10lgP | Mass      | Length | ppm | m/z      | z | RT    | Fraction | Scan     | Source File                                | Area ebraeus | Area judaeus | #Feature | #Feature ebraeus | #Feature judaeus | Start | End | PTM                  | AScore                                                                  | Found By |
|-------------------------------|------|--------|-----------|--------|-----|----------|---|-------|----------|----------|--------------------------------------------|--------------|--------------|----------|------------------|------------------|-------|-----|----------------------|-------------------------------------------------------------------------|----------|
| R.FC(+57.02)C(+57.02)EGSLGK.R | Y    | 75.34  | 1056.4369 | 9      | 0.9 | 529.2242 | 2 | 19.81 | 1        | F1:11260 | 20210611-08_2021021-OK192A_815_5.3.236.mgf | 0            |              | 0        | 0                | 0                | 21    | 29  | Carbamidomethylation | C2:Carb amidome thylatio n:1000.0 0;C3:Car bamidom ethylatio n:1000.0 0 | PEAKS DB |
| total 1 peptides              |      |        |           |        |     |          |   |       |          |          |                                            |              |              |          |                  |                  |       |     |                      |                                                                         |          |

A\_0885\_033\_I1-1

back to list

| [Protein Coverage](#) | [Supporting Peptides](#) |

Protein Coverage:

|   |                       |                                                                          |              |                                          |
|---|-----------------------|--------------------------------------------------------------------------|--------------|------------------------------------------|
| 1 | QFGCSEAGET CKTYSSCCSR | <div><div>2223</div><div>CC</div><div>FCCEGSLGK</div><div>CC</div></div> | CARLSCDDIG V | <div>Carbamidomethylation (+57.02)</div> |
|---|-----------------------|--------------------------------------------------------------------------|--------------|------------------------------------------|

Supporting Peptides:

| Peptide                       | Uniq | -10lgP | Mass      | Length | ppm | m/z      | z | RT    | Fraction | Scan     | Source File                                | Area ebraeus | Area judaeus | #Feature | #Feature ebraeus | #Feature judaeus | Start | End | PTM                  | AScore                                                                  | Found By |
|-------------------------------|------|--------|-----------|--------|-----|----------|---|-------|----------|----------|--------------------------------------------|--------------|--------------|----------|------------------|------------------|-------|-----|----------------------|-------------------------------------------------------------------------|----------|
| R.FC(+57.02)C(+57.02)EGSLGK.R | Y    | 75.34  | 1056.4369 | 9      | 0.9 | 529.2242 | 2 | 19.81 | 1        | F1:11260 | 20210611-08_2021021-OK192A_815_5.3.236.mgf | 0            |              | 0        | 0                | 0                | 21    | 29  | Carbamidomethylation | C2:Carb amidome thylatio n:1000.0 0;C3:Car bamidom ethylatio n:1000.0 0 | PEAKS DB |
| total 1 peptides              |      |        |           |        |     |          |   |       |          |          |                                            |              |              |          |                  |                  |       |     |                      |                                                                         |          |

A\_0031\_321\_I1-1

back to list

| [Protein Coverage](#) | [Supporting Peptides](#) |

Protein Coverage:

|   |                       |                                                                          |              |                                          |
|---|-----------------------|--------------------------------------------------------------------------|--------------|------------------------------------------|
| 1 | QFSCSEAGET CKTYSSCCSR | <div><div>2223</div><div>CC</div><div>FCCEGSLGK</div><div>CC</div></div> | CARLSCDDIG V | <div>Carbamidomethylation (+57.02)</div> |
|---|-----------------------|--------------------------------------------------------------------------|--------------|------------------------------------------|



Supporting Peptides:

| Peptide                       | Uniq | -10lgP | Mass      | Length | ppm | m/z      | z | RT    | Fraction | Scan     | Source File                                | Area ebraeus | Area judaeus | #Feature | #Feature ebraeus | #Feature judaeus | Start | End | PTM                  | AScore                                                                  | Found By |
|-------------------------------|------|--------|-----------|--------|-----|----------|---|-------|----------|----------|--------------------------------------------|--------------|--------------|----------|------------------|------------------|-------|-----|----------------------|-------------------------------------------------------------------------|----------|
| R.FC(+57.02)C(+57.02)EGSLGK.R | Y    | 75.34  | 1056.4369 | 9      | 0.9 | 529.2242 | 2 | 19.81 | 1        | F1:11260 | 20210611-08_2021021-OK192A_815_5.3.236.mgf | 0            |              | 0        | 0                | 0                | 21    | 29  | Carbamidomethylation | C2:Carb amidome thylatio n:1000.0 0;C3:Car bamidom ethylatio n:1000.0 0 | PEAKS DB |
| total 1 peptides              |      |        |           |        |     |          |   |       |          |          |                                            |              |              |          |                  |                  |       |     |                      |                                                                         |          |

A\_0055\_009\_I1-1

[back to list](#)

| [Protein Coverage](#) | [Supporting Peptides](#) |

Protein Coverage:

1 QFGCSEAGET CKTYSSCCSR <sup>22 23</sup>FCCEGSLGKR CARLSCDDIG V Carbamidomethylation (+57.02)

Supporting Peptides:

| Peptide                       | Uniq | -10lgP | Mass      | Length | ppm | m/z      | z | RT    | Fraction | Scan     | Source File                                | Area ebraeus | Area judaeus | #Feature | #Feature ebraeus | #Feature judaeus | Start | End | PTM                  | AScore                                                                  | Found By |
|-------------------------------|------|--------|-----------|--------|-----|----------|---|-------|----------|----------|--------------------------------------------|--------------|--------------|----------|------------------|------------------|-------|-----|----------------------|-------------------------------------------------------------------------|----------|
| R.FC(+57.02)C(+57.02)EGSLGK.R | Y    | 75.34  | 1056.4369 | 9      | 0.9 | 529.2242 | 2 | 19.81 | 1        | F1:11260 | 20210611-08_2021021-OK192A_815_5.3.236.mgf | 0            |              | 0        | 0                | 0                | 21    | 29  | Carbamidomethylation | C2:Carb amidome thylatio n:1000.0 0;C3:Car bamidom ethylatio n:1000.0 0 | PEAKS DB |
| total 1 peptides              |      |        |           |        |     |          |   |       |          |          |                                            |              |              |          |                  |                  |       |     |                      |                                                                         |          |

AXL95521\_conotoxin\_precursor\_superfamily\_I1\_Conus\_ermineus

[back to list](#)

| [Protein Coverage](#) | [Supporting Peptides](#) |

Protein Coverage:

1 QFGCSEAGET CKTYSSCCSR <sup>22 23</sup>FCCEGSLGKR CARLSCDDIG V Carbamidomethylation (+57.02)

Supporting Peptides:

| Peptide                       | Uniq | -10lgP | Mass      | Length | ppm | m/z      | z | RT    | Fraction | Scan     | Source File                                | Area ebraeus | Area judaeus | #Feature | #Feature ebraeus | #Feature judaeus | Start | End | PTM                  | AScore                                                                  | Found By |
|-------------------------------|------|--------|-----------|--------|-----|----------|---|-------|----------|----------|--------------------------------------------|--------------|--------------|----------|------------------|------------------|-------|-----|----------------------|-------------------------------------------------------------------------|----------|
| R.FC(+57.02)C(+57.02)EGSLGK.R | Y    | 75.34  | 1056.4369 | 9      | 0.9 | 529.2242 | 2 | 19.81 | 1        | F1:11260 | 20210611-08_2021021-OK192A_815_5.3.236.mgf | 0            |              | 0        | 0                | 0                | 21    | 29  | Carbamidomethylation | C2:Carb amidome thylatio n:1000.0 0;C3:Car bamidom ethylatio n:1000.0 0 | PEAKS DB |
| total 1 peptides              |      |        |           |        |     |          |   |       |          |          |                                            |              |              |          |                  |                  |       |     |                      |                                                                         |          |

V\_CG13\_054\_I1-1

[back to list](#)

| [Protein Coverage](#) | [Supporting Peptides](#) |

Protein Coverage:

1 QFDCSEAGET CMNYSSCCSR <sup>22 23</sup>FCCEGSLGKR CARLSCDDIG V Carbamidomethylation (+57.02)

Supporting Peptides:

| Peptide                       | Uniq | -10lgP | Mass      | Length | ppm | m/z      | z | RT    | Fraction | Scan     | Source File                                | Area ebraeus | Area judaeus | #Feature | #Feature ebraeus | #Feature judaeus | Start | End | PTM                  | AScore                                                                  | Found By |
|-------------------------------|------|--------|-----------|--------|-----|----------|---|-------|----------|----------|--------------------------------------------|--------------|--------------|----------|------------------|------------------|-------|-----|----------------------|-------------------------------------------------------------------------|----------|
| R.FC(+57.02)C(+57.02)EGSLGK.R | Y    | 75.34  | 1056.4369 | 9      | 0.9 | 529.2242 | 2 | 19.81 | 1        | F1:11260 | 20210611-08_2021021-OK192A_815_5.3.236.mgf | 0            |              | 0        | 0                | 0                | 21    | 29  | Carbamidomethylation | C2:Carb amidome thylatio n:1000.0 0;C3:Car bamidom ethylatio n:1000.0 0 | PEAKS DB |
| total 1 peptides              |      |        |           |        |     |          |   |       |          |          |                                            |              |              |          |                  |                  |       |     |                      |                                                                         |          |

A\_0855\_014\_I1-1

[back to list](#)

| [Protein Coverage](#) | [Supporting Peptides](#) |

Protein Coverage:

1 HRQFGCSEAG ETCKTYSSCC SR<sup>24 25</sup>FCCEGSLG KR CARLSCDD IG V Carbamidomethylation (+57.02)

Supporting Peptides:

| Peptide                       | Uniq | -10lgP | Mass      | Length | ppm | m/z      | z | RT    | Fraction | Scan     | Source File                                | Area ebraeus | Area judaeus | #Feature | #Feature ebraeus | #Feature judaeus | Start | End | PTM                  | AScore                                                                  | Found By |
|-------------------------------|------|--------|-----------|--------|-----|----------|---|-------|----------|----------|--------------------------------------------|--------------|--------------|----------|------------------|------------------|-------|-----|----------------------|-------------------------------------------------------------------------|----------|
| R.FC(+57.02)C(+57.02)EGSLGK.R | Y    | 75.34  | 1056.4369 | 9      | 0.9 | 529.2242 | 2 | 19.81 | 1        | F1:11260 | 20210611-08_2021021-OK192A_815_5.3.236.mgf | 0            |              | 0        | 0                | 0                | 23    | 31  | Carbamidomethylation | C2:Carb amidome thylatio n:1000.0 0;C3:Car bamidom ethylatio n:1000.0 0 | PEAKS DB |
| total 1 peptides              |      |        |           |        |     |          |   |       |          |          |                                            |              |              |          |                  |                  |       |     |                      |                                                                         |          |

A\_0520\_205\_I1-1

[back to list](#)

| [Protein Coverage](#) | [Supporting Peptides](#) |

Protein Coverage:

1 ALLKGDWQFG CSEAGETCKT YSSCCSR<sup>29 30</sup>FCC EGS LGKRCAR LSCDDIG V Carbamidomethylation (+57.02)

Supporting Peptides:

| Peptide                       | Uniq | -10lgP | Mass      | Length | ppm | m/z      | z | RT    | Fraction | Scan     | Source File                                | Area ebraeus | Area judaeus | #Feature | #Feature ebraeus | #Feature judaeus | Start | End | PTM                  | AScore                                                                  | Found By |
|-------------------------------|------|--------|-----------|--------|-----|----------|---|-------|----------|----------|--------------------------------------------|--------------|--------------|----------|------------------|------------------|-------|-----|----------------------|-------------------------------------------------------------------------|----------|
| R.FC(+57.02)C(+57.02)EGSLGK.R | Y    | 75.34  | 1056.4369 | 9      | 0.9 | 529.2242 | 2 | 19.81 | 1        | F1:11260 | 20210611-08_2021021-OK192A_815_5.3.236.mgf | 0            |              | 0        | 0                | 0                | 28    | 36  | Carbamidomethylation | C2:Carb amidome thylatio n:1000.0 0;C3:Car bamidom ethylatio n:1000.0 0 | PEAKS DB |
| total 1 peptides              |      |        |           |        |     |          |   |       |          |          |                                            |              |              |          |                  |                  |       |     |                      |                                                                         |          |

CV8\_288\_Protein

[back to list](#)

| [Protein Coverage](#) | [Supporting Peptides](#) |

Protein Coverage:

|     |            |            |             |            |            |            |                             |               |
|-----|------------|------------|-------------|------------|------------|------------|-----------------------------|---------------|
| 1   | MALPWKALLF | ASFTLLYVIP | FRFGAKQNKK  | DLIIRVDDFK | DFKLLLRTRT | NLLVIFTQSE | KAASKSLALF                  | EEVAEEMRGK    |
| 81  | ATMAYINCGD | DKKLCKKLKV | YTTTFELKHY  | KDGEFNKNYD | RKLTVKSMVN | FLMDPTGDIP | WDEDLTATDV                  | VHIDTEDGLN    |
| 161 | KLLKKDKSAA | LVMFYAPWCG | YCKRLKPDFA  | AAATEVKGKA | NLVGIDVDKP | HMMGLRTLYN | ITGFPTLYYF                  | EKGKVKYRYG    |
| 241 | GENSKDGIVS | WLSNPKPPEE | PKKEAEWAEE  | PSEVVHLEDD | NFDDYIKEHP | SVLVMFYAPW | CGHCKMKKPG                  | YTEAAQLIKD    |
| 321 | QEIPSVLAAV | DATKHKRLAD | TYNIKGFPPTL | KYFKDGEFAF | DVNERDKDKI | IDFVKDPKEP | PPPPAPEPSW                  | EEVDSVDIHL    |
| 401 | NEENFKPTLK | KRKHALIMFY | APWCGHCKKA  | KPEFMAAAAK | FRDDGKVMFG | AVDCTTQQGI | CSAHDVTGYP                  | TFKYFNYNKN    |
| 481 | SQKYMGGREE | NDFVNFMRDP | LSPSPSPPTA  | STKPEEDWAD | IPGKDFIGFL | TKDTFDSFVL | SQGSVLVMFY                  | APWCGHCKRM    |
| 561 | KPAFGQAASV | IVEEKLGAAL | AVDATIEQQQL | ADRFEIRGYP | TLKYFKGGKY | AFEYSGGR   | <a href="#">TA DDFIAFLR</a> | NP DAPPTTPSPE |
| 641 | AQWSDIVSDV | HHLTDTSFDE | FIAANKKTLV  | MFYSPGCGHC | KMKKPDYMTA | ATRLKEKAPD | ARLAAVDATR                  | FKDLARKYHI    |
| 721 | KGYPTLKYFE | DGALKADYKS | GRSAEDLVEF  | FSTASDKKDE | L          |            |                             |               |

Supporting Peptides:

| Peptide          | Uniq | -10lgP | Mass      | Length | ppm  | m/z      | z | RT    | Fraction | Scan      | Source File                                | Area ebraeus | Area judaeus | #Feature | #Feature ebraeus | #Feature judaeus | Start | End | PTM | AScore | Found By |
|------------------|------|--------|-----------|--------|------|----------|---|-------|----------|-----------|--------------------------------------------|--------------|--------------|----------|------------------|------------------|-------|-----|-----|--------|----------|
| R.TADDFIAFLR.N   | Y    | 74.95  | 1167.5924 | 10     | -3.5 | 584.7990 | 2 | 52.65 | 2        | F2:123233 | 20210611-09_2021021-OK160A_816_5.3.236.mgf |              | 0            | 0        | 0                | 0                | 619   | 628 |     |        | PEAKS DB |
| total 1 peptides |      |        |           |        |      |          |   |       |          |           |                                            |              |              |          |                  |                  |       |     |     |        |          |

OK213\_E\_328\_PDI

[back to list](#)

| [Protein Coverage](#) | [Supporting Peptides](#) |

Protein Coverage:

|     |            |            |             |            |            |            |                             |               |
|-----|------------|------------|-------------|------------|------------|------------|-----------------------------|---------------|
| 1   | MALPWKALLF | ASFTLLYVIP | FRFGAKQNKK  | DLIIRVDDFK | DFKLLLRTRT | NLLVIFTQSE | KAASKSLALF                  | EEVAEEMRGK    |
| 81  | ATMAYINCGD | DKKLCKKLKV | YTTTFELKHY  | KDGEFNKNYD | RKLTVKSMVN | FLMDPTGDIP | WDEDLTATDV                  | VHIDTEDGLN    |
| 161 | KLLKKDKSAA | LVMFYAPWCG | YCKRLKPDFA  | AAATEVKGKA | NLVGIDVDKP | HMMGLRTLYN | ITGFPTLYYF                  | EKGKVKYRYG    |
| 241 | GENSKEGIVS | WLSNPKPPEE | PKKEAEWAEE  | PSEVVHLEDD | NFDDYIKEHP | SVLVMFYAPW | CGHCKMKKPG                  | YTEAAQLIKD    |
| 321 | QEIPSILAAV | DATKHKRLAE | TYNIKGFPPTL | KYFKEGEFAF | DVNERDKDKI | IDFVKDPKEP | PPPPAPEPSW                  | EEVDSVDIHL    |
| 401 | NEENFKPTLK | KRKHALIMFY | APWCGHCKKA  | KPEFMAAAAK | FRDDGKVMFG | AVDCTTQQGV | CSAHDVTGYP                  | TFKYFNYNKN    |
| 481 | SQKYMGGREE | NDFVNFMRDP | LSPSPSPPTA  | STKPEEDWAD | IPGKDLIGFL | TKDTFDSFVL | SQGSVLVMFY                  | APWCGHCKRM    |
| 561 | KPAFGQAASV | IVEEKLGAAL | AVDATIEQQQL | ADRFEIRGYP | TLKYFRDGKY | AFEYSGGR   | <a href="#">TA DDFIAFLR</a> | NP DAPPTTPSPE |
| 641 | PQWSDIVSDV | HHLTDTSFDE | FIAANKKTLV  | MFYSPGCGHC | KMKKPDYMTA | ATRLKEKVPD | ARLAAVDATK                  | FKDLAHKYHI    |
| 721 | KGYPTLKYFE | DGAFKADYKS | GRSAEDLVEF  | FSMASDKKDE | L          |            |                             |               |

Supporting Peptides:

| Peptide          | Uniq | -10lgP | Mass      | Length | ppm  | m/z      | z | RT    | Fraction | Scan      | Source File                                | Area ebraeus | Area judaeus | #Feature | #Feature ebraeus | #Feature judaeus | Start | End | PTM | AScore | Found By |
|------------------|------|--------|-----------|--------|------|----------|---|-------|----------|-----------|--------------------------------------------|--------------|--------------|----------|------------------|------------------|-------|-----|-----|--------|----------|
| R.TADDFIAFLR.N   | Y    | 74.95  | 1167.5924 | 10     | -3.5 | 584.7990 | 2 | 52.65 | 2        | F2:123233 | 20210611-09_2021021-OK160A_816_5.3.236.mgf |              | 0            | 0        | 0                | 0                | 619   | 628 |     |        | PEAKS DB |
| total 1 peptides |      |        |           |        |      |          |   |       |          |           |                                            |              |              |          |                  |                  |       |     |     |        |          |

OK006\_E\_297\_PDI

[back to list](#)

| [Protein Coverage](#) | [Supporting Peptides](#) |

Protein Coverage:

|     |            |            |             |            |            |            |                             |               |
|-----|------------|------------|-------------|------------|------------|------------|-----------------------------|---------------|
| 1   | MALPWKALLF | ASFTLLYVIP | FRFGAKQNKK  | DLIIRVDDFK | DFKLLLRTRT | NLLVIFTQSE | KAASKSLALF                  | EEVAEEMRGK    |
| 81  | ATMAYINCGD | DKKLCKKLKV | YTTTFELKHY  | KDGEFNKNYD | RKLTVKSMVN | FLMDPTGDIP | WDEDLTATDV                  | VHIDTEDGLN    |
| 161 | KLLKKDKSAA | LVMFYAPWCG | YCKRLKPDFA  | AAATEVKGKA | NLVGIDVDKP | HMMGLRTLYN | ITGFPTLYYF                  | EKGKVKYRYG    |
| 241 | GENSKEGIVS | WLSNPKPPEE | PKKEAEWAEE  | PSEVVHLEDD | NFDDYIKEHP | SVLVMFYAPW | CGHCKMKKPG                  | YTEAAQLIKD    |
| 321 | QEIPSILAAV | DATKHKRLAE | TYNIKGFPPTL | KYFKEGEFAF | DVNERDKDKI | IDFVKDPKEP | PPPPAPEPSW                  | EEVDSVDIHL    |
| 401 | NEENFKPTLK | KRKHALIMFY | APWCGHCKKA  | KPEFMAAAAK | FRDDGKVMFG | AVDCTTQQGV | CSAHDVTGYP                  | TFKYFNYNKN    |
| 481 | SQKYMGGREE | NDFVNFMRDP | LSPSPSPPTA  | STKPEEDWAD | IPGKDLIGFL | TKDTFDSFVL | SQGSVLVMFY                  | APWCGHCKRM    |
| 561 | KPAFGQAASV | IVEEKLGAAL | AVDATIEQQQL | ADRFEIRGYP | TLKYFRDGKY | AFEYSGGR   | <a href="#">TA DDFIAFLR</a> | NP DAPPTTPSPE |
| 641 | PQWSDIVSDV | HHLTDTSFDE | FIAANKKTLV  | MFYSPGCGHC | KMKKPDYMTA | ATRLKEKVPD | ARLAAVDATK                  | FKDLAHKYHI    |
| 721 | KGYPTLKYFE | DGAFKADYKS | GRSAEDLVEF  | FSMASDKKDE | L          |            |                             |               |

Supporting Peptides:

| Peptide          | Uniq | -10lgP | Mass      | Length | ppm  | m/z      | z | RT    | Fraction | Scan      | Source File                                | Area ebraeus | Area judaeus | #Feature | #Feature ebraeus | #Feature judaeus | Start | End | PTM | AScore | Found By |
|------------------|------|--------|-----------|--------|------|----------|---|-------|----------|-----------|--------------------------------------------|--------------|--------------|----------|------------------|------------------|-------|-----|-----|--------|----------|
| R.TADDFIAFLR.N   | Y    | 74.95  | 1167.5924 | 10     | -3.5 | 584.7990 | 2 | 52.65 | 2        | F2:123233 | 20210611-09_2021021-OK160A_816_5.3.236.mgf |              | 0            | 0        | 0                | 0                | 619   | 628 |     |        | PEAKS DB |
| total 1 peptides |      |        |           |        |      |          |   |       |          |           |                                            |              |              |          |                  |                  |       |     |     |        |          |

K\_0010\_438\_Protein

[back to list](#)

| [Protein Coverage](#) | [Supporting Peptides](#) |

Protein Coverage:

|     |            |             |            |             |            |            |            |                                     |
|-----|------------|-------------|------------|-------------|------------|------------|------------|-------------------------------------|
| 1   | MRGKATMAYI | NCGDDKRLCK  | KLKVYTTTFF | LKHYKDGEFN  | KNYDRKLTVK | SMVNFLMDPT | GDIPWDEDLT | ATDVVHIDTE                          |
| 81  | DGLNKKLLKD | KSAAALVMFYA | PWCGYCKRLK | PDFAAAATEV  | KGKANLVGID | VDKPHMMGLR | TLYNITGFPT | LYYFEKGKVK                          |
| 161 | YRFGGENSK  | GIVSWLSNPK  | PPEEPKKEAE | WAEEPSEVVH  | LEDDNFDDYI | KEHPSVLVMF | YAPWCGHCKK | MKPGYTEAAQ                          |
| 241 | LIKDQEIPSV | LAAVDATKHR  | KLAETYNIKG | FPTLKIFYKFG | EFAFDVNERD | KDKIIDFVKD | PKEPPPPAP  | EPSWEEVDSD                          |
| 321 | VIHLNEENFK | PTLKKRKHAL  | IMFYAPWCGH | CKKAKPEFMA  | AAAKFRDDGK | VMFGAVDCTT | QQGICSAHDV | TGYPTFKYFN                          |
| 401 | YNKNSQKYM  | GREENDFVNF  | MRDPLSPSPS | PPTASTKPEE  | DWADIPGKDL | IGFLTCKDTF | SFVLSQGSVL | VMFYAPWCGH                          |
| 481 | CKRMKPAFGQ | AASVIVEEKL  | GALAAVDATI | EQQLADRFEI  | RGYPTLKYFK | GGKYAFEYS  | GR         | <a href="#">TADDFIAFLR</a> NPDPAPPT |
| 561 | PSPEPQWSDI | VSDVHHLTDT  | SFDEFIAANK | KTLVMFYSPG  | CGHCKMKKPD | YMTAATRLKE | KVPDARLAAV | DATRFKDLAR                          |
| 641 | KYHIKGYPTL | KYFEDGAFKA  | DYKSGRSAED | LVEFFSTASD  | KKDEL      |            |            |                                     |

Supporting Peptides:

| Peptide          | Uniq | -10lgP | Mass      | Length | ppm  | m/z      | z | RT    | Fraction | Scan      | Source File                                | Area ebraeus | Area judaeus | #Feature | #Feature ebraeus | #Feature judaeus | Start | End | PTM | AScore | Found By |
|------------------|------|--------|-----------|--------|------|----------|---|-------|----------|-----------|--------------------------------------------|--------------|--------------|----------|------------------|------------------|-------|-----|-----|--------|----------|
| R.TADDFIAFLR.N   | Y    | 74.95  | 1167.5924 | 10     | -3.5 | 584.7990 | 2 | 52.65 | 2        | F2:123233 | 20210611-09_2021021-OK160A_816_5.3.236.mgf |              | 0            | 0        | 0                | 0                | 543   | 552 |     |        | PEAKS DB |
| total 1 peptides |      |        |           |        |      |          |   |       |          |           |                                            |              |              |          |                  |                  |       |     |     |        |          |

V\_1258\_178\_Protein

[back to list](#)

| [Protein Coverage](#) | [Supporting Peptides](#) |

Protein Coverage:

1 MVNFLMDPTG DIPWDEDLTA TDVVHIDTED GLNKLLKKDK SAALVMFYAP WCGYCKRLKP DFAAAATEVK GKANLVGIDV  
81 DKPHMMGLRT LYNITGFPTL YFEKKGKVY RYGGENSKDG IVSWLSNPKP PEEPKEAEW AEPESEVVHL EDDNFDDYIK  
161 EHPSVLVMFY APWCGHCKKM KPGYTEAAQL IKDQEIPSVL AAVDATKHRK LADTYNIKGF PTLKYFKDGE FAFDVNERDK  
241 DKIIDFVKDP KEPPPPPAPE PSWEEVDSDV IHLNEENFKP TLKKRKHALI MFYAPWCGHC KKAKPEFMAA AAKFRDDGKV  
321 MFGAVDCTTQ QGICSAHDVT GYPTFKYFNY NKNSQKYMGG REENDFVNFM RDPLSPSPSP PTASTKPEED WADIPGKDFI  
401 GFLTCTDFDS FVLSQGSVLV MFYAPWCGHC KRMKPAFGQA ASMIVEEKLG ALAAVDATIE QQLADRFEIR GYPTLKYFKG  
481 GKYAFEYSGG R**TADDFIAFL**RNPDAPTTP SPEPQWSDIV SDVHHLTDTS FDEFIAANKK TLVMFYSPGC GHCKMKPKDY  
  
561 MTAATRLKEK VPDARLAAVD ATRFKDLARK YHIKGYPTLK YFEDGALKAD YKSGRSAEDL VEFFSTASDK KDEL

Supporting Peptides:

| Peptide          | Uniq | -10lgP | Mass      | Length | ppm  | m/z      | z | RT    | Fraction | Scan      | Source File                                | Area ebraeus | Area judaeus | #Feature | #Feature ebraeus | #Feature judaeus | Start | End | PTM | AScore | Found By |
|------------------|------|--------|-----------|--------|------|----------|---|-------|----------|-----------|--------------------------------------------|--------------|--------------|----------|------------------|------------------|-------|-----|-----|--------|----------|
| R.TADDFIAFLR.N   | Y    | 74.95  | 1167.5924 | 10     | -3.5 | 584.7990 | 2 | 52.65 | 2        | F2:123233 | 20210611-09_2021021-OK160A_816_5.3.236.mgf |              | 0            | 0        | 0                | 0                | 492   | 501 |     |        | PEAKS DB |
| total 1 peptides |      |        |           |        |      |          |   |       |          |           |                                            |              |              |          |                  |                  |       |     |     |        |          |

V\_1302\_231\_Protein

[back to list](#)

| [Protein Coverage](#) | [Supporting Peptides](#) |

Protein Coverage:

1 MVNFLMDPTG DIPWDEDLTA TDVVHIDTED GLNKLLKKDK SAALVMFYAP WCGYCKRLKP DFAAAATEVK GKANLVGIDV  
81 DKPHMMGLRT LYNITGFPTL YFEKKGKVY RYGGENSKDG IVSWLSNPKP PEEPKEAEW AEPESEVVHL EDDNFDDYIK  
161 EHPSVLVMFY APWCGHCKKM KPGYTEAAQL IKDQEIPSVL AAVDATKHRK LADTYNIKGF PTLKYFKDGE FAFDVNERDK  
241 DKIIDFVKDP KEPPPPPAPE PSWEEVDSDV IHLNEENFKP TLKKRKHALI MFYAPWCGHC KKAKPEFMAA AAKFRDDGKV  
321 MFGAVDCTTQ QGICSAHDVT GYPTFKYFNY NKNSQKYMGG REENDFVNFM RDPLSPSPSP PTASTKPEED WADIPGKDFI  
401 GFLTCTDFDS FVLSQGSVLV MFYAPWCGHC KRMKPAFGQA ASMIVEEKLG ALAAVDATIE QQLADRFEIR GYPTLKYFKG  
481 GKYAFEYSGG R**TADDFIAFL**RNPDAPTTP SPEPQWSDIV SDVHHLTDTS FDEFIAANKK TLVMFYSPGC GHCKMKPKDY  
  
561 MTAATRLKEK VPDARLAAVD ATRFKDLARK YHIKGYPTLK YFEDGALKAD YKSGRSAEDL VEFFSTASDK KDEL

Supporting Peptides:

| Peptide          | Uniq | -10lgP | Mass      | Length | ppm  | m/z      | z | RT    | Fraction | Scan      | Source File                                | Area ebraeus | Area judaeus | #Feature | #Feature ebraeus | #Feature judaeus | Start | End | PTM | AScore | Found By |
|------------------|------|--------|-----------|--------|------|----------|---|-------|----------|-----------|--------------------------------------------|--------------|--------------|----------|------------------|------------------|-------|-----|-----|--------|----------|
| R.TADDFIAFLR.N   | Y    | 74.95  | 1167.5924 | 10     | -3.5 | 584.7990 | 2 | 52.65 | 2        | F2:123233 | 20210611-09_2021021-OK160A_816_5.3.236.mgf |              | 0            | 0        | 0                | 0                | 492   | 501 |     |        | PEAKS DB |
| total 1 peptides |      |        |           |        |      |          |   |       |          |           |                                            |              |              |          |                  |                  |       |     |     |        |          |

CebrOK033\_J\_269\_PDI

[back to list](#)

| [Protein Coverage](#) | [Supporting Peptides](#) |

Protein Coverage:

1 FKDFKLLRT RTNLLVIFTQ SEKAASKSLA LFEEVAEEMR GKATMAYINC GDDKCLKKL KVYTTTFELK HYKDEGFNKN  
81 YDRRLTVKSM VNFLMDPTGD IPWDEDLTAT DVVHIDTEDG LNKLLKKDKS AALVMFYAPW CGYCKRLKPD FAAAATEVKG  
161 KANLVGIDVD KPHMMGLRTL YNITGFPTLY YFEKKGKVYR YGGENSEKEGI VSWLSNPKPP EEPKKEAWA EEPSEVVHLE  
241 DDNFDDYIKE HPSVLVMFYA PWCCHCKMKM PGYTEAAQLI KDQEIPSVLA AVDATKHRKL AETYNIKGFP TLKYFKEGEF  
321 AFDVNERDKD KIIDFVKDPK EPPPPPAPEP SWEVDSVDVI HLNEENFKPT LKKRKHALIM FYAPWCGHCK KAKPEFMAAA  
401 AKFRDDGKVM FGAVDCTTQQ GVCSAHDVTG YPTFKYFNYN KNSQKYMGG R EENDFVNFM RDPLSPSPSP TASTKPEEDW  
481 ADIPGKDLIG FLTCTDFDSF VLSQGSVLVM FYAPWCGHCK RMKPAFGQAA SVIVEEKLGA LAAVDATIEQ QQLADRFEIRG  
561 YPTLKYFRDG KYAFEYSGGR TADDFIAFLRNPDAPTTPS PEPQWSDIVS DVHHLTDTSF DEFIAANKKT LVMFYSPGCG  
  
641 HCKMKPKDYM TAATRLKEKV PDARLAAVDA TRFKDLARKY HIKGYPTLKY FEDGAFKADY KSGRSAEDLV EFFSMASDKK  
721 DEL

Supporting Peptides:

| Peptide          | Uniq | -10lgP | Mass      | Length | ppm  | m/z      | z | RT    | Fraction | Scan      | Source File                                | Area ebraeus | Area judaeus | #Feature | #Feature ebraeus | #Feature judaeus | Start | End | PTM | AScore | Found By |
|------------------|------|--------|-----------|--------|------|----------|---|-------|----------|-----------|--------------------------------------------|--------------|--------------|----------|------------------|------------------|-------|-----|-----|--------|----------|
| R.TADDFIAFLR.N   | Y    | 74.95  | 1167.5924 | 10     | -3.5 | 584.7990 | 2 | 52.65 | 2        | F2:123233 | 20210611-09_2021021-OK160A_816_5.3.236.mgf |              | 0            | 0        | 0                | 0                | 581   | 590 |     |        | PEAKS DB |
| total 1 peptides |      |        |           |        |      |          |   |       |          |           |                                            |              |              |          |                  |                  |       |     |     |        |          |

SRX1323887\_E\_250\_PDI

[back to list](#)

| [Protein Coverage](#) | [Supporting Peptides](#) |

Protein Coverage:

1 MALPWKALLF ASFTLLYVIP FRFGAKQNKK DLIIRVDDFK DFKLLRTRT NLLVIFTQSE KAASKSLALF EEVAEEMRGK  
81 ATMAYINCGD DKKLCKKLKV YTTTFELKHY KDGEFNKNYD RKLTVKSMVN FLMDPTGDIP WDEDLTATDV VHIDTEDGLN  
161 KLLKKDKSAA LVMFYAPWCG YCKRLKPDFA AAATEVKGKA NLVGIDVDKP HMMGLRTLYN ITGFPTLYYF EKGKVYRYG  
241 GENSKGIVS WLSNPKPPEE PKKEAEWAE PSEVVHLEDD NFDYIKEHP SVLVMFYAPW CGHCKMKMKP YTEAAQLIKD  
321 QEIPSVLAAV DATKHRKLAE TYNIKGFPTL KYFKEGEFAF DVNERDKDKI IDFVKDPKEP PPPPAPEPSW EEVDSVDVIHL  
401 NEENFKPTLK KRKHALIMFY APWCGHCKKA KPEFMAAAK FRDDGKVMFG AVDCTTQQGV CSAHDVTGYPT FKYFNYNKN  
481 SQKYMGGREE NDFVNFM RDP LSPSPSPPTA STKPEEDWAD IPGKDLIGFL TKDTFDSFVL SQGSVLVMFY APWCGHCKRM  
561 KPAPGQAASV IVEEKLGA LAVDATIEQQ LADRFEIRGYP TLKYFRDGKY AFEYSGGR TA DDFIAFLRNPDAPTTPSPE  
  
641 PQWSDIVSDV HHLTDTSFDE FIAANKKTLV MFYSPGCGHC KMKPKDYMATA ATRLKEKVPD ARLAAVDATK FKDLAHKYHI  
721 KGYPTLKYFE DGAFKADYKS GRSAEDLVEF FSMASDKKDE L

Supporting Peptides:

| Peptide          | Uniq | -10lgP | Mass      | Length | ppm  | m/z      | z | RT    | Fraction | Scan      | Source File                                | Area ebraeus | Area judaeus | #Feature | #Feature ebraeus | #Feature judaeus | Start | End | PTM | AScore | Found By |
|------------------|------|--------|-----------|--------|------|----------|---|-------|----------|-----------|--------------------------------------------|--------------|--------------|----------|------------------|------------------|-------|-----|-----|--------|----------|
| R.TADDFIAFLR.N   | Y    | 74.95  | 1167.5924 | 10     | -3.5 | 584.7990 | 2 | 52.65 | 2        | F2:123233 | 20210611-09_2021021-OK160A_816_5.3.236.mgf |              | 0            | 0        | 0                | 0                | 619   | 628 |     |        | PEAKS DB |
| total 1 peptides |      |        |           |        |      |          |   |       |          |           |                                            |              |              |          |                  |                  |       |     |     |        |          |

OK214\_J\_339\_PDI

[back to list](#)

| [Protein Coverage](#) | [Supporting Peptides](#) |

Protein Coverage:

1 MALPWKALLF ASFTLLYVIP FRFGAKQNKK DLIIRVDDFK DFKLLLRTRT NLLVIFTQSE KAASKSLALF EEVAEEMRGK  
81 ATMAYINCGD DKKLCKKLKV YTTTFELKHY KDGEFNKNYD RKLTVKSMVN FLMDPTGDIP WDEDLTATDV VHIDTEDGLN  
161 KLLKKDKSAA LVMFYAPWCG YCKRLKPDFA AAATEVKGKA NLVGIDVDKP HMMGLRTLYN ITGFPTLYYF EKGKVKYRYG  
241 GENSKEGIVS WLSNPKPPEE PKKEAEWAAE PSEVVHLEDD NFDDYIKEHP SVLVMFYAPW CGHCKMKMPG YTEAAQLIKD  
321 QEIPSVLAAV DATKHKRLAE TYNIKGFPTL KYFKEGEFAF DVNERDKDKI IDFKVDPKEP PPPPAPEPSW EEVDSDVIHL  
401 NEENFKPTLK KRKHALIMFY APWCGHCKKA KPEFMAAAAK FRDDGKVMFG AVDCTTQQGV CSAHDVTGYP TFKYFNYNKN  
481 SQKYMGGREE NDFVNFMRDP LSPSPSPPTA STKPEEDWAD IPGKDLIGFL TKDTFDSFVL SQGSVLVMFY APWCGHCKRM  
561 KPAFGQAASV IVEEKLGAAL AVDATIEQQQL ADRFEIRGYP TLKYFRDGKY AFEYSGGR**TA DDFIAFLR**NP DAPPTTSPSE  
  
641 PQWSDIVSDV HHLTDTSFDE FIAANKKTLV MFYSPGCGHC KMKPDYMTA ATRLKEKVPD ARLAAVDATR FKDLARKYHI  
721 KGYPTLKYFE DGAFKADYKS GRSADLVEF FSMASDKKDE L

Supporting Peptides:

| Peptide          | Uniq | -10lgP | Mass      | Length | ppm  | m/z      | z | RT    | Fraction | Scan      | Source File                                | Area ebraeus | Area judaeus | #Feature | #Feature ebraeus | #Feature judaeus | Start | End | PTM | AScore | Found By |
|------------------|------|--------|-----------|--------|------|----------|---|-------|----------|-----------|--------------------------------------------|--------------|--------------|----------|------------------|------------------|-------|-----|-----|--------|----------|
| R.TADDFIAFLR.N   | Y    | 74.95  | 1167.5924 | 10     | -3.5 | 584.7990 | 2 | 52.65 | 2        | F2:123233 | 20210611-09_2021021-OK160A_816_5.3.236.mgf |              | 0            | 0        | 0                | 0                | 619   | 628 |     |        | PEAKS DB |
| total 1 peptides |      |        |           |        |      |          |   |       |          |           |                                            |              |              |          |                  |                  |       |     |     |        |          |

OK212\_J\_327\_PDI

[back to list](#)

| [Protein Coverage](#) | [Supporting Peptides](#) |

Protein Coverage:

1 MALPWKALLF ASFTLLYVIP FRFGAKQNKK DLIIRVDDFK DFKLLLRTRT NLLVIFTQSE KAASKSLALF EEVAEEMRGK  
81 ATMAYINCGD DKKLCKKLKV YTTTFELKHY KDGEFNKNYD RKLTVKSMVN FLMDPTGDIP WDEDLTATDV VHIDTEDGLN  
161 KLLKKDKSAA LVMFYAPWCG YCKRLKPDFA AAATEVKGKA NLVGIDVDKP HMMGLRTLYN ITGFPTLYYF EKGKVKYRYG  
241 GENSKEGIVS WLSNPKPPEE PKKEAEWAAE PSEVVHLEDD NFDDYIKEHP SVLVMFYAPW CGHCKMKMPG YTEAAQLIKD  
321 QEIPSVLAAV DATKHKRLAE TYNIKGFPTL KYFKEGEFAF DVNERDKDKI IDFKVDPKEP PPPPAPEPSW EEVDSDVIHL  
401 NEENFKPTLK KRKHALIMFY APWCGHCKKA KPEFMAAAAK FRDDGKVMFG AVDCTTQQGV CSAHDVTGYP TFKYFNYNKN  
481 SQKYMGGREE NDFVNFMRDP LSPSPSPPTA STKPEEDWAD IPGKDLIGFL TKDTFDSFVL SQGSVLVMFY APWCGHCKRM  
561 KPAFGQAASV IVEEKLGAAL AVDATIEQQQL ADRFEIRGYP TLKYFRDGKY AFEYSGGR**TA DDFIAFLR**NP DAPPTTSPSE  
  
641 PQWSDIVSDV HHLTDTSFDE FIAANKKTLV MFYSPGCGHC KMKPDYMTA ATRLKEKVPD ARLAAVDATR FKDLARKYHI  
721 KGYPTLKYFE DGAFKADYKS GRSADLVEF FSMASDKKDE L

Supporting Peptides:

| Peptide          | Uniq | -10lgP | Mass      | Length | ppm  | m/z      | z | RT    | Fraction | Scan      | Source File                                | Area ebraeus | Area judaeus | #Feature | #Feature ebraeus | #Feature judaeus | Start | End | PTM | AScore | Found By |
|------------------|------|--------|-----------|--------|------|----------|---|-------|----------|-----------|--------------------------------------------|--------------|--------------|----------|------------------|------------------|-------|-----|-----|--------|----------|
| R.TADDFIAFLR.N   | Y    | 74.95  | 1167.5924 | 10     | -3.5 | 584.7990 | 2 | 52.65 | 2        | F2:123233 | 20210611-09_2021021-OK160A_816_5.3.236.mgf |              | 0            | 0        | 0                | 0                | 619   | 628 |     |        | PEAKS DB |
| total 1 peptides |      |        |           |        |      |          |   |       |          |           |                                            |              |              |          |                  |                  |       |     |     |        |          |

OK193\_E\_274\_PDI

[back to list](#)

| [Protein Coverage](#) | [Supporting Peptides](#) |

Protein Coverage:

1 MALPWKALLF ASFTLLYVIP FRFGAKQNKK DLIIRVDDFK DFKLLLRTRT NLLVIFTQSE KAASKSLALF EEVAEEMRGK  
81 ATMAYINCGD DKKLCKKLKV YTTTFELKHY KDGEFNKNYD RKLTVKSMVN FLMDPTGDIP WDEDLTATDV VHIDTEDGLN  
161 KLLKKDKSAA LVMFYAPWCG YCKRLKPDFA AAATEVKGKA NLVGIDVDKP HMMGLRTLYN ITGFPTLYYF EKGKVKYRYG  
241 GENSKEGIVS WLSNPKPPEE PKKEAEWAAE PSEVVHLEDD NFDDYIKEHP SVLVMFYAPW CGHCKMKMPG YTEAAQLIKD  
321 QEIPSVLAAV DATKHKRLAE TYNIKGFPTL KYFKEGEFAF DVNERDKDKI IDFKVDPKEP PPPPAPEPSW EEVDSDVIHL  
401 NEENFKPTLK KRKHALIMFY APWCGHCKKA KPEFMAAAAK FRDDGKVMFG AVDCTTQQGV CSAHDVTGYP TFKYFNYNKN  
481 SQKYMGGREE NDFVNFMRDP LSPSPSPPTA STKPEEDWAD IPGKDLIGFL TKDTFDSFVL SQGSVLVMFY APWCGHCKRM  
561 KPAFGQAASV IVEEKLGAAL AVDATIEQQQL ADRFEIRGYP TLKYFRDGKY AFEYSGGR**TA DDFIAFLR**NP DAPPTTSPSE  
  
641 PQWSDIVSDV HHLTDTSFDE FIAANKKTLV MFYSPGCGHC KMKPDYMTA ATRLKEKVPD ARLAAVDATR FKDLAHKYHI  
721 KGYPTLKYFE DGAFKADYKS GRSADLVEF FSMASDKKDE L

Supporting Peptides:

| Peptide          | Uniq | -10lgP | Mass      | Length | ppm  | m/z      | z | RT    | Fraction | Scan      | Source File                                | Area ebraeus | Area judaeus | #Feature | #Feature ebraeus | #Feature judaeus | Start | End | PTM | AScore | Found By |
|------------------|------|--------|-----------|--------|------|----------|---|-------|----------|-----------|--------------------------------------------|--------------|--------------|----------|------------------|------------------|-------|-----|-----|--------|----------|
| R.TADDFIAFLR.N   | Y    | 74.95  | 1167.5924 | 10     | -3.5 | 584.7990 | 2 | 52.65 | 2        | F2:123233 | 20210611-09_2021021-OK160A_816_5.3.236.mgf |              | 0            | 0        | 0                | 0                | 619   | 628 |     |        | PEAKS DB |
| total 1 peptides |      |        |           |        |      |          |   |       |          |           |                                            |              |              |          |                  |                  |       |     |     |        |          |

OK005\_J\_321\_PDI

[back to list](#)

| [Protein Coverage](#) | [Supporting Peptides](#) |

Protein Coverage:

1 MALPWKALLF ASFTLLYVIP FRFGAKQNKK DLIIRVDDFK DFKLLLRTRT NLLVIFTQSE KAASKSLALF EEVAEEMRGK  
81 ATMAYINCGD DKKLCKKLKV YTTTFELKHY KDGEFNKNYD RKLTVKSMVN FLMDPTGDIP WDEDLTATDV VHIDTEDGLN  
161 KLLKKDKSAA LVMFYAPWCG YCKRLKPDFA AAATEVKGKA NLVGIDVDKP HMMGLRTLYN ITGFPTLYYF EKGKVKYRYG  
241 GENSKEGIVS WLSNPKPPEE PKKEAEWAAE PSEVVHLEDD NFDDYIKEHP SVLVMFYAPW CGHCKMKMPG YTEAAQLIKD  
321 QEIPSVLAAV DATKHKRLAE TYNIKGFPTL KYFKEGEFAF DVNERDKDKI IDFKVDPKEP PPPPAPEPSW EEVDSDVIHL  
401 NEENFKPTLK KRKHALIMFY APWCGHCKKA KPEFMAAAAK FRDDGKVMFG AVDCTTQQGV CSAHDVTGYP TFKYFNYNKN  
481 SQKYMGGREE NDFVNFMRDP LSPSPSPPTA STKPEEDWAD IPGKDLIGFL TKDTFDSFVL SQGSVLVMFY APWCGHCKRM  
561 KPAFGQAASV IVEEKLGAAL AVDATIEQQQL ADRFEIRGYP TLKYFRDGKY AFEYSGGR**TA DDFIAFLR**NP DAPPTTSPSE  
  
641 PQWSDIVSDV HHLTDTSFDE FIAANKKTLV MFYSPGCGHC KMKPDYMTA ATRLKEKVPD ARLAAVDATR FKDLARKYHI  
721 KGYPTLKYFE DGAFKADYKS GRSADLVEF FSMASDKKDE L

Supporting Peptides:

| Peptide          | Uniq | -10lgP | Mass      | Length | ppm  | m/z      | z | RT    | Fraction | Scan      | Source File                                | Area ebraeus | Area judaeus | #Feature | #Feature ebraeus | #Feature judaeus | Start | End | PTM | AScore | Found By |
|------------------|------|--------|-----------|--------|------|----------|---|-------|----------|-----------|--------------------------------------------|--------------|--------------|----------|------------------|------------------|-------|-----|-----|--------|----------|
| R.TADDFIAFLR.N   | Y    | 74.95  | 1167.5924 | 10     | -3.5 | 584.7990 | 2 | 52.65 | 2        | F2:123233 | 20210611-09_2021021-OK160A_816_5.3.236.mgf |              | 0            | 0        | 0                | 0                | 619   | 628 |     |        | PEAKS DB |
| total 1 peptides |      |        |           |        |      |          |   |       |          |           |                                            |              |              |          |                  |                  |       |     |     |        |          |

A\_0855\_170\_Protein

[back to list](#)

| [Protein Coverage](#) | [Supporting Peptides](#) |

Protein Coverage:

1 SPKPPEEPKK EAEWAEPESE VVHLEDDNFD DYIKEHPSVL VMFYAPWCGH CKMKPGYTE AAQLIKDQEI PSVLAAVDAT  
81 KHRKLADTYN IKGFP TLKYF KGEFAFDVN ERDKDKIIDF VKDPKEPPPP PAPEPSWEEV DSDVIHLNEE NFKPTLKKRK  
161 HALIMFYAPW CGHCKKAKPE FMAAAAKFRD DGKVMFGAVD CTTQQGICSA HDVTGYPTFK YFNYNKNSQK YMGREENDF  
241 VNFMRDPLSP SPSPTASTK PEEDWADIPG KDFIGFLTKD TFDSEFVLSQG SVLVMFYAPW CGHCKRMKPA FGQAASVIVE  
321 EKLGA LAVD ATIEQQLADR FEIRGYPTLK YFKGKYAFE YSGGR **TADDF IAFLR** NPDAP PTPSPPEPQW SDIVSDVHHL  
  
401 TDTSEFDEFIA ANKKTLMVMFY SPGCGHCKKM KPDYMTAATR LKEKVPDARL AAVDATRFKD LARKYHIKGY PNLKYFEDGA  
481 LKADYKSGRS AEDLVEFFST ASDKKDEL

Supporting Peptides:

| Peptide          | Uniq | -10lgP | Mass      | Length | ppm  | m/z      | z | RT    | Fraction | Scan      | Source File                                | Area ebraeus | Area judaeus | #Feature | #Feature ebraeus | #Feature judaeus | Start | End | PTM | AScore | Found By |
|------------------|------|--------|-----------|--------|------|----------|---|-------|----------|-----------|--------------------------------------------|--------------|--------------|----------|------------------|------------------|-------|-----|-----|--------|----------|
| R.TADDFIAFLR.N   | Y    | 74.95  | 1167.5924 | 10     | -3.5 | 584.7990 | 2 | 52.65 | 2        | F2:123233 | 20210611-09_2021021-OK160A_816_5.3.236.mgf |              | 0            | 0        | 0                | 0                | 366   | 375 |     |        | PEAKS DB |
| total 1 peptides |      |        |           |        |      |          |   |       |          |           |                                            |              |              |          |                  |                  |       |     |     |        |          |

A\_0039\_255\_Protein

[back to list](#)

| [Protein Coverage](#) | [Supporting Peptides](#) |

Protein Coverage:

1 MHCDSGCLVH SPKPPEEPKK EAEWAEPESE VVHLEDDNFD DYIKEHPSVL VMFYAPWCGH CKMKPGYTE AAQLIKDQEI  
81 PSVLAAVDAT KHRKLADTYN IKGFP TLKYF KGEFAFDVN ERDKDKIIDF VKDPKEPPPP PAPEPSWEEV DSDVIHLNEE  
161 NFKPTLKKRK HALIMFYAPW CGHCKKAKPE FMAAAAKFRD DGKVMFGAVD CTTQQGICSA HDVTGYPTFK YFNYNKNSQK  
241 YMGREENDF VNFMRDPLSP SPSPTASTK PEEDWADIPG KDFIGFLTKD TFDSEFVLSQG SVLVMFYAPW CGHCKRMKPA  
321 FGQAASVIVE EKLGA LAVD ATIEQQLADR FEIRGYPTLK YFKRGKYAFE YSGGR **TADDF IAFLR** NPDAP PTPSPPEPQW  
  
401 SDIVSDVHHL TDTSEFDEFIA ANKKTLMVMFY SPGCGHCKKM KPDYMTAATR LKEKVPDARL AAVDATRFKD LARKYHIKGY  
481 PTLKYFEDGA LKADYKSGRS AEDLVEFFST ASDKKDEL

Supporting Peptides:

| Peptide          | Uniq | -10lgP | Mass      | Length | ppm  | m/z      | z | RT    | Fraction | Scan      | Source File                                | Area ebraeus | Area judaeus | #Feature | #Feature ebraeus | #Feature judaeus | Start | End | PTM | AScore | Found By |
|------------------|------|--------|-----------|--------|------|----------|---|-------|----------|-----------|--------------------------------------------|--------------|--------------|----------|------------------|------------------|-------|-----|-----|--------|----------|
| R.TADDFIAFLR.N   | Y    | 74.95  | 1167.5924 | 10     | -3.5 | 584.7990 | 2 | 52.65 | 2        | F2:123233 | 20210611-09_2021021-OK160A_816_5.3.236.mgf |              | 0            | 0        | 0                | 0                | 376   | 385 |     |        | PEAKS DB |
| total 1 peptides |      |        |           |        |      |          |   |       |          |           |                                            |              |              |          |                  |                  |       |     |     |        |          |

A\_0239\_037\_Protein

[back to list](#)

| [Protein Coverage](#) | [Supporting Peptides](#) |

Protein Coverage:

1 MHCDSGCLVH SPKPPEEPKK EAEWAEPESE VVHLEDDNFD DYIKEHPSVL VMFYAPWCGH CKMKPGYTE AAQLIKDQEI  
81 PSVLAAVDAT KHRKLADTYN IKGFP TLKYF KGEFAFDVN ERDKDKIIDF VKDPKEPPPP PAPEPSWEEV DSDVIHLNEE  
161 NFKPTLKKRK HALIMFYAPW CGHCKKAKPE FMAAAAKFRD DGKVMFGAVD CTTQQGICSA HDVTGYPTFK YFNYNKNSQK  
241 YMGREENDF VNFMRDPLSP SPSPTASTK PEEDWADIPG KDFIGFLTKD TFDSEFVLSQG SVLVMFYAPW CGHCKRMKPA  
321 FGQAASVIVE EKLGA LAVD ATIEQQLADR FEIRGYPTLK YFKGKYAFE YSGGR **TADDF IAFLR** NPDAP PTPSPPEPQW  
  
401 SDIVSDVHHL TDTSEFDEFIA ANKKTLMVMFY SPGCGHCKKM KPDYMTAATR LKEKVPDARL AAVDATRFKD LARKYHIKGY  
481 PTLKYFEDGA LKADYKSGRS AEDLVEFFST ASDKKDEL

Supporting Peptides:

| Peptide          | Uniq | -10lgP | Mass      | Length | ppm  | m/z      | z | RT    | Fraction | Scan      | Source File                                | Area ebraeus | Area judaeus | #Feature | #Feature ebraeus | #Feature judaeus | Start | End | PTM | AScore | Found By |
|------------------|------|--------|-----------|--------|------|----------|---|-------|----------|-----------|--------------------------------------------|--------------|--------------|----------|------------------|------------------|-------|-----|-----|--------|----------|
| R.TADDFIAFLR.N   | Y    | 74.95  | 1167.5924 | 10     | -3.5 | 584.7990 | 2 | 52.65 | 2        | F2:123233 | 20210611-09_2021021-OK160A_816_5.3.236.mgf |              | 0            | 0        | 0                | 0                | 376   | 385 |     |        | PEAKS DB |
| total 1 peptides |      |        |           |        |      |          |   |       |          |           |                                            |              |              |          |                  |                  |       |     |     |        |          |

V\_1278\_149\_Protein

[back to list](#)

| [Protein Coverage](#) | [Supporting Peptides](#) |

Protein Coverage:

1 MVNFLMDPTG DIPWDEDLTA TDVVHIDTED GLNKLLKKDK SAALVMFYAP WCGYCKRLKP DFAAAATEVK GKANLVGIDV  
81 DKPHMMGLRT LYNITGFPTL YYFEKGKVY RYGGENSKDG IVSWLSNPKP PEEPKEAEW AEPESEVVHL EDDNFDDYIK  
161 EHPSVLVMFY APWCGHCKKM KPGYTEAAQL IKDQEIPSVL AAVDATKHRK LADTYNIKGF PTLKYFKDGE FAFDVNERDK  
241 DKIIDFKVDP KPPPPPAPE PSWEEVDSV IHLNEENFKP TLKKRKHALI MFYAPWCGHC KKAKEPFMAA AAKFRDDGKV  
321 MFGAVDCTTG QGICSAHDVT GYPTFKYFNY NKNSQKYMGG REENDFVNFM RDPLSPSPSP PTASTKPEED WADIPGKDFI  
401 GFLT KDTFDS FVLSQGSVLV MFYAPWCGHC KRMKPAFGQA ASVIVEEKLG ALAAVDATIE QQLADRFEIR GYPTLKYFKG  
481 GKYAFEYSGG R**TADDFIAFL R** NPDAPPTTP SPEPQWSDIV SDVHHLTDT S DFEFIAANKK TLVMFYSPGC GHCKMKMPDY  
  
561 MTAATRLKEK VPDARLA AVD ATRFKDLARK YHIKGYPTLK YFEDGALKAD YKSGRSAEDL VEFFSTASDK KDEL

Supporting Peptides:

| Peptide          | Uniq | -10lgP | Mass      | Length | ppm  | m/z      | z | RT    | Fraction | Scan      | Source File                                | Area ebraeus | Area judaeus | #Feature | #Feature ebraeus | #Feature judaeus | Start | End | PTM | AScore | Found By |
|------------------|------|--------|-----------|--------|------|----------|---|-------|----------|-----------|--------------------------------------------|--------------|--------------|----------|------------------|------------------|-------|-----|-----|--------|----------|
| R.TADDFIAFLR.N   | Y    | 74.95  | 1167.5924 | 10     | -3.5 | 584.7990 | 2 | 52.65 | 2        | F2:123233 | 20210611-09_2021021-OK160A_816_5.3.236.mgf |              | 0            | 0        | 0                | 0                | 492   | 501 |     |        | PEAKS DB |
| total 1 peptides |      |        |           |        |      |          |   |       |          |           |                                            |              |              |          |                  |                  |       |     |     |        |          |

A\_0039\_254\_Protein

[back to list](#)

| [Protein Coverage](#) | [Supporting Peptides](#) |

Protein Coverage:

1 MVNFLMDPTG DIPWDEDLTA TDVVHIYTED GLNKLLKKDK SAALVMFYAP WCGYCKRLKP DFAAAATEVK GKANLVGIDV  
81 DKPHMMGLRT LYNITGFPTL YYFEKGKVY RYGGENSKDG IVSWLSNPKP PEEPKEAEW AEPESEVVHL EDDNFDDYIK  
161 EHPSVLVMFY APWCGHCKKM KPGYTEAAQL IKDQEIPSVL AAVDATKHRK LADTYNIKGF PTLKYFKDGE FAFDVNERDK  
241 DKIIDFKVDP KPPPPPAPE PSWEEVDSV IHLNEENFKP TLKKRKHALI MFYAPWCGHC KKAKEPFMAA AAKFRDDGKV  
321 MFGAVDCTTG QGICSAHDVT GYPTFKYFNY NKNSQKYMGG REENDFVNFM RDPLSPSPSP PTASTKPEED WADIPGKDFI  
401 GFLT KDTFDS FVLSQGSVLV MFYAPWCGHC KMKPAFGQA ASVIVEEKLG ALAAVDATIE QQLADRFEIR GYPTLKYFKR  
481 GKYAFEYSGG R**TADDFIAFL R** NPDAPPTTP SPEPQWSDIV SDVHHLTDT S DFEFIAANKK TLVMFYSPGC GHCKMKMPDY  
  
561 MTAATRLKEK VPDARLA AVD ATRFKDLARK YHIKGYPTLK YFEDGALKAD YKSGRSAEDL VEFFSTASDK KDEL

Supporting Peptides:

| Peptide          | Uniq | -10lgP | Mass      | Length | ppm  | m/z      | z | RT    | Fraction | Scan      | Source File                                | Area ebraeus | Area judaeus | #Feature | #Feature ebraeus | #Feature judaeus | Start | End | PTM | AScore | Found By |
|------------------|------|--------|-----------|--------|------|----------|---|-------|----------|-----------|--------------------------------------------|--------------|--------------|----------|------------------|------------------|-------|-----|-----|--------|----------|
| R.TADDFIAFLR.N   | Y    | 74.95  | 1167.5924 | 10     | -3.5 | 584.7990 | 2 | 52.65 | 2        | F2:123233 | 20210611-09_2021021-OK160A_816_5.3.236.mgf |              | 0            | 0        | 0                | 0                | 492   | 501 |     |        | PEAKS DB |
| total 1 peptides |      |        |           |        |      |          |   |       |          |           |                                            |              |              |          |                  |                  |       |     |     |        |          |

V\_CG13\_297\_Protein

[back to list](#)



### Protein Coverage:

### Supporting Peptides:

### A\_0855\_171\_Protein

[back to list](#)

### Protein Coverage:

### Supporting Peptides:

### A\_0055\_279\_Protein

[back to list](#)

### Protein Coverage:

### Supporting Peptides:

### A\_0875\_155\_Protein

[back to list](#)

### Protein Coverage:

### Supporting Peptides:

**A\_0885\_186\_Protein**

[back to list](#)

### Protein Coverage:

### Supporting Peptides:

| Peptide          | Uniq | -10lgP | Mass | Length | ppm | m/z | z | RT | Fraction | Scan | Source File | Area<br>ebraeus | Area<br>judaeus | #Feature | #Feature<br>ebraeus | #Feature<br>judaeus | Start | End | PTM | AScore | Found<br>By |
|------------------|------|--------|------|--------|-----|-----|---|----|----------|------|-------------|-----------------|-----------------|----------|---------------------|---------------------|-------|-----|-----|--------|-------------|
| total 1 peptides |      |        |      |        |     |     |   |    |          |      |             |                 |                 |          |                     |                     |       |     |     |        |             |



| Peptide          | Uniq | -10lgP | Mass      | Length | ppm  | m/z      | z | RT    | Fraction | Scan      | Source File                                | Area ebraeus | Area judaeus | #Feature | #Feature ebraeus | #Feature judaeus | Start | End | PTM | AScore | Found By |
|------------------|------|--------|-----------|--------|------|----------|---|-------|----------|-----------|--------------------------------------------|--------------|--------------|----------|------------------|------------------|-------|-----|-----|--------|----------|
| R.TADDIFIAFLR.N  | Y    | 74.95  | 1167.5924 | 10     | -3.5 | 584.7990 | 2 | 52.65 | 2        | F2:123233 | 20210611-09_2021021-OK160A_816_5.3.236.mgf |              | 0            | 0        | 0                | 0                | 492   | 501 |     |        | PEAKS DB |
| total 1 peptides |      |        |           |        |      |          |   |       |          |           |                                            |              |              |          |                  |                  |       |     |     |        |          |

OK193\_E\_118\_N

back to list

| [Protein Coverage](#) | [Supporting Peptides](#) |

Protein Coverage:

1 CPGPKSCGSG EAEVCCESDD CYCK**LLHSQP FSR**LVVCVCPD

Supporting Peptides:

| Peptide          | Uniq | -10lgP | Mass      | Length | ppm | m/z      | z | RT    | Fraction | Scan     | Source File                                | Area ebraeus | Area judaeus | #Feature | #Feature ebraeus | #Feature judaeus | Start | End | PTM | AScore | Found By |
|------------------|------|--------|-----------|--------|-----|----------|---|-------|----------|----------|--------------------------------------------|--------------|--------------|----------|------------------|------------------|-------|-----|-----|--------|----------|
| K.LLHSQPFSTR.L   | Y    | 73.45  | 1083.5825 | 9      | 1.9 | 362.2008 | 3 | 21.01 | 1        | F1:12663 | 20210611-08_2021021-OK192A_815_5.3.236.mgf | 0            |              | 0        | 0                | 0                | 25    | 33  |     |        | PEAKS DB |
| total 1 peptides |      |        |           |        |     |          |   |       |          |          |                                            |              |              |          |                  |                  |       |     |     |        |          |

SRX1323887\_E\_088\_N

back to list

| [Protein Coverage](#) | [Supporting Peptides](#) |

Protein Coverage:

1 CPGPKSCGSG EAEVCCESDD CYCK**LLHSQP FSR**LVVCVCPD

Supporting Peptides:

| Peptide          | Uniq | -10lgP | Mass      | Length | ppm | m/z      | z | RT    | Fraction | Scan     | Source File                                | Area ebraeus | Area judaeus | #Feature | #Feature ebraeus | #Feature judaeus | Start | End | PTM | AScore | Found By |
|------------------|------|--------|-----------|--------|-----|----------|---|-------|----------|----------|--------------------------------------------|--------------|--------------|----------|------------------|------------------|-------|-----|-----|--------|----------|
| K.LLHSQPFSTR.L   | Y    | 73.45  | 1083.5825 | 9      | 1.9 | 362.2008 | 3 | 21.01 | 1        | F1:12663 | 20210611-08_2021021-OK192A_815_5.3.236.mgf | 0            |              | 0        | 0                | 0                | 25    | 33  |     |        | PEAKS DB |
| total 1 peptides |      |        |           |        |     |          |   |       |          |          |                                            |              |              |          |                  |                  |       |     |     |        |          |

OK213\_E\_135\_N

back to list

| [Protein Coverage](#) | [Supporting Peptides](#) |

Protein Coverage:

1 CPGPKSCGSG EAEVCCESDD CYCK**LLHSQP FSR**LVVCVCPD

Supporting Peptides:

| Peptide          | Uniq | -10lgP | Mass      | Length | ppm | m/z      | z | RT    | Fraction | Scan     | Source File                                | Area ebraeus | Area judaeus | #Feature | #Feature ebraeus | #Feature judaeus | Start | End | PTM | AScore | Found By |
|------------------|------|--------|-----------|--------|-----|----------|---|-------|----------|----------|--------------------------------------------|--------------|--------------|----------|------------------|------------------|-------|-----|-----|--------|----------|
| K.LLHSQPFSTR.L   | Y    | 73.45  | 1083.5825 | 9      | 1.9 | 362.2008 | 3 | 21.01 | 1        | F1:12663 | 20210611-08_2021021-OK192A_815_5.3.236.mgf | 0            |              | 0        | 0                | 0                | 25    | 33  |     |        | PEAKS DB |
| total 1 peptides |      |        |           |        |     |          |   |       |          |          |                                            |              |              |          |                  |                  |       |     |     |        |          |

OK193\_E\_117\_N

back to list

| [Protein Coverage](#) | [Supporting Peptides](#) |

Protein Coverage:

1 CPGPKSCGSG EAEVCCESDD CYCK**LLHSQP FSR**LVVCVCPD

Supporting Peptides:

| Peptide          | Uniq | -10lgP | Mass      | Length | ppm | m/z      | z | RT    | Fraction | Scan     | Source File                                | Area ebraeus | Area judaeus | #Feature | #Feature ebraeus | #Feature judaeus | Start | End | PTM | AScore | Found By |
|------------------|------|--------|-----------|--------|-----|----------|---|-------|----------|----------|--------------------------------------------|--------------|--------------|----------|------------------|------------------|-------|-----|-----|--------|----------|
| K.LLHSQPFSTR.L   | Y    | 73.45  | 1083.5825 | 9      | 1.9 | 362.2008 | 3 | 21.01 | 1        | F1:12663 | 20210611-08_2021021-OK192A_815_5.3.236.mgf | 0            |              | 0        | 0                | 0                | 25    | 33  |     |        | PEAKS DB |
| total 1 peptides |      |        |           |        |     |          |   |       |          |          |                                            |              |              |          |                  |                  |       |     |     |        |          |

V\_CG13\_125\_A-1

back to list

| [Protein Coverage](#) | [Supporting Peptides](#) |

Protein Coverage:

1 DGCCSFPPCK **GIHPHLC<sup>17</sup>A<sup>6</sup>** Carbamidomethylation (+57.02)

Supporting Peptides:

| Peptide            | Uniq | -10lgP | Mass     | Length | ppm | m/z      | z | RT    | Fraction | Scan    | Source File                                | Area ebraeus | Area judaeus | #Feature | #Feature ebraeus | #Feature judaeus | Start | End | PTM                  | AScore                          | Found By |
|--------------------|------|--------|----------|--------|-----|----------|---|-------|----------|---------|--------------------------------------------|--------------|--------------|----------|------------------|------------------|-------|-----|----------------------|---------------------------------|----------|
| K.GIHPHLC(+57.02)A | Y    | 72.97  | 903.4385 | 8      | 0.9 | 452.7252 | 2 | 18.46 | 1        | F1:9724 | 20210611-08_2021021-OK192A_815_5.3.236.mgf | 0            |              | 0        | 0                | 0                | 11    | 18  | Carbamidomethylation | C7:Carbamidomethylation:1000.00 | PEAKS DB |
| total 1 peptides   |      |        |          |        |     |          |   |       |          |         |                                            |              |              |          |                  |                  |       |     |                      |                                 |          |

OK006\_E\_107\_M

back to list

| [Protein Coverage](#) | [Supporting Peptides](#) |

Protein Coverage:

1 **KLDADQPVKR** YVENKENLNP D

Supporting Peptides:

| Peptide          | Uniq | -10lgP | Mass      | Length | ppm | m/z      | z | RT    | Fraction | Scan     | Source File                                | Area ebraeus | Area judaeus | #Feature | #Feature ebraeus | #Feature judaeus | Start | End | PTM | AScore | Found By |
|------------------|------|--------|-----------|--------|-----|----------|---|-------|----------|----------|--------------------------------------------|--------------|--------------|----------|------------------|------------------|-------|-----|-----|--------|----------|
| K.LDADQPVKR.Y    | Y    | 72.81  | 1040.5614 | 9      | 1.8 | 521.2867 | 2 | 13.67 | 2        | F2:56990 | 20210611-09_2021021-OK160A_816_5.3.236.mgf |              |              | 0        | 0                | 0                | 2     | 10  |     |        | PEAKS DB |
| total 1 peptides |      |        |           |        |     |          |   |       |          |          |                                            |              |              |          |                  |                  |       |     |     |        |          |

OK213\_E\_203\_Q

back to list

| [Protein Coverage](#) | [Supporting Peptides](#) |

Protein Coverage:

1 MDTNDCTPCA PDLCCRPGLR CATSTR**QGHY DEPACV<sup>35</sup>SY<sup>6</sup>** Carbamidomethylation (+57.02)

Supporting Peptides:

| Peptide                            | Uniq | -10lgP | Mass      | Length | ppm | m/z      | z | RT    | Fraction | Scan     | Source File                                | Area ebraeus | Area judaeus | #Feature | #Feature ebraeus | #Feature judaeus | Start | End | PTM                  | AScore                          | Found By |
|------------------------------------|------|--------|-----------|--------|-----|----------|---|-------|----------|----------|--------------------------------------------|--------------|--------------|----------|------------------|------------------|-------|-----|----------------------|---------------------------------|----------|
| R.QGHYDEPAC(+57.02)VS <sup>Y</sup> | Y    | 72.77  | 1424.5667 | 12     | 3.9 | 713.2906 | 2 | 26.76 | 1        | F1:20862 | 20210611-08_2021021-OK192A_815_5.3.236.mgf | 0            |              | 0        | 0                | 0                | 27    | 38  | Carbamidomethylation | C9:Carbamidomethylation:1000.00 | PEAKS DB |
| total 1 peptides                   |      |        |           |        |     |          |   |       |          |          |                                            |              |              |          |                  |                  |       |     |                      |                                 |          |

OK213\_E\_192\_O2

back to list

| [Protein Coverage](#) | [Supporting Peptides](#) |

Protein Coverage:

1 DGGSVGRSLK GPIQLPWGKS VVLRKDVQSG WDQPADRNAV PRDDNPGGAI GKS

Supporting Peptides:

| Peptide          | Uniq | -10lgP | Mass     | Length | ppm | m/z      | z | RT    | Fraction | Scan     | Source File                                | Area ebraeus | Area judaeus | #Feature | #Feature ebraeus | #Feature judaeus | Start | End | PTM | AScore | Found By |
|------------------|------|--------|----------|--------|-----|----------|---|-------|----------|----------|--------------------------------------------|--------------|--------------|----------|------------------|------------------|-------|-----|-----|--------|----------|
| K.GPIQLPWGK.S    | Y    | 71.13  | 994.5599 | 9      | 0.3 | 498.2855 | 2 | 42.60 | 1        | F1:40496 | 20210611-08_2021021-OK192A_815_5.3.236.mgf | 0            |              | 0        | 0                | 0                | 11    | 19  |     |        | PEAKS DB |
| total 1 peptides |      |        |          |        |     |          |   |       |          |          |                                            |              |              |          |                  |                  |       |     |     |        |          |

OK005\_J\_272\_Ggeo01

[back to list](#)

| [Protein Coverage](#) | [Supporting Peptides](#) |

Protein Coverage:

1 SQADDGGTEK R SWPMSDADL K GTFDKIGHG SFGGGFGGGK 🔍 Oxidation (M) (+15.99)

Supporting Peptides:

| Peptide                | Uniq | -10lgP | Mass      | Length | ppm  | m/z      | z | RT    | Fraction | Scan     | Source File                                | Area ebraeus | Area judaeus | #Feature | #Feature ebraeus | #Feature judaeus | Start | End | PTM           | AScore                   | Found By |
|------------------------|------|--------|-----------|--------|------|----------|---|-------|----------|----------|--------------------------------------------|--------------|--------------|----------|------------------|------------------|-------|-----|---------------|--------------------------|----------|
| R.SWPMSDADLK.G         | Y    | 70.99  | 1148.5172 | 10     | -0.6 | 575.2631 | 2 | 35.64 | 2        | F2:93830 | 20210611-09_2021021-OK160A_816_5.3.236.mgf |              | 0            | 0        | 0                | 0                | 12    | 21  |               |                          | PEAKS DB |
| R.SWPM(+15.99)SDADLK.G | Y    | 53.35  | 1164.5121 | 10     | 2.5  | 583.2623 | 2 | 28.17 | 2        | F2:80256 | 20210611-09_2021021-OK160A_816_5.3.236.mgf |              | 0            | 0        | 0                | 0                | 12    | 21  | Oxidation (M) | M4:Oxidation (M):1000.00 | PEAKS DB |
| total 2 peptides       |      |        |           |        |      |          |   |       |          |          |                                            |              |              |          |                  |                  |       |     |               |                          |          |

CebrOK035\_J\_299\_Ggeo01

[back to list](#)

| [Protein Coverage](#) | [Supporting Peptides](#) |

Protein Coverage:

1 SQADDGGTEK R SWPMSDADL K GTFDKIGHG SFGGGFGGGK 🔍 Oxidation (M) (+15.99)

Supporting Peptides:

| Peptide                | Uniq | -10lgP | Mass      | Length | ppm  | m/z      | z | RT    | Fraction | Scan     | Source File                                | Area ebraeus | Area judaeus | #Feature | #Feature ebraeus | #Feature judaeus | Start | End | PTM           | AScore                   | Found By |
|------------------------|------|--------|-----------|--------|------|----------|---|-------|----------|----------|--------------------------------------------|--------------|--------------|----------|------------------|------------------|-------|-----|---------------|--------------------------|----------|
| R.SWPMSDADLK.G         | Y    | 70.99  | 1148.5172 | 10     | -0.6 | 575.2631 | 2 | 35.64 | 2        | F2:93830 | 20210611-09_2021021-OK160A_816_5.3.236.mgf |              | 0            | 0        | 0                | 0                | 12    | 21  |               |                          | PEAKS DB |
| R.SWPM(+15.99)SDADLK.G | Y    | 53.35  | 1164.5121 | 10     | 2.5  | 583.2623 | 2 | 28.17 | 2        | F2:80256 | 20210611-09_2021021-OK160A_816_5.3.236.mgf |              | 0            | 0        | 0                | 0                | 12    | 21  | Oxidation (M) | M4:Oxidation (M):1000.00 | PEAKS DB |
| total 2 peptides       |      |        |           |        |      |          |   |       |          |          |                                            |              |              |          |                  |                  |       |     |               |                          |          |

OK214\_J\_263\_Ggeo01

[back to list](#)

| [Protein Coverage](#) | [Supporting Peptides](#) |

Protein Coverage:

1 SQADDGGTEK R SWPMSDADL K GTFDKIGHG SFGGGFGGGK 🔍 Oxidation (M) (+15.99)

Supporting Peptides:

| Peptide                | Uniq | -10lgP | Mass      | Length | ppm  | m/z      | z | RT    | Fraction | Scan     | Source File                                | Area ebraeus | Area judaeus | #Feature | #Feature ebraeus | #Feature judaeus | Start | End | PTM           | AScore                   | Found By |
|------------------------|------|--------|-----------|--------|------|----------|---|-------|----------|----------|--------------------------------------------|--------------|--------------|----------|------------------|------------------|-------|-----|---------------|--------------------------|----------|
| R.SWPMSDADLK.G         | Y    | 70.99  | 1148.5172 | 10     | -0.6 | 575.2631 | 2 | 35.64 | 2        | F2:93830 | 20210611-09_2021021-OK160A_816_5.3.236.mgf |              | 0            | 0        | 0                | 0                | 12    | 21  |               |                          | PEAKS DB |
| R.SWPM(+15.99)SDADLK.G | Y    | 53.35  | 1164.5121 | 10     | 2.5  | 583.2623 | 2 | 28.17 | 2        | F2:80256 | 20210611-09_2021021-OK160A_816_5.3.236.mgf |              | 0            | 0        | 0                | 0                | 12    | 21  | Oxidation (M) | M4:Oxidation (M):1000.00 | PEAKS DB |
| total 2 peptides       |      |        |           |        |      |          |   |       |          |          |                                            |              |              |          |                  |                  |       |     |               |                          |          |

gene:107285462

[back to list](#)

| [Protein Coverage](#) | [Supporting Peptides](#) |

Protein Coverage:

1 MSPVRAVLAL LAALWAPAAG YFVSIDAHAE ECFLERVPSG TKMGLIFEVA EGGFLDIDVE ITGPDNKGIIH KGDRESSGKY  
81 TFAAHMDGTG Y KFCFSNMST MTPKIVMFTI DIGEAPKQD METEAHQNL EEMINELAVA MTAVK HEQY MEVR ERVHRA  
161 INDNTNSRVV LWSFFEALVL VAMTLGQIYY LKRFFEVRRV V

Supporting Peptides:

| Peptide          | Uniq | -10lgP | Mass      | Length | ppm  | m/z      | z | RT    | Fraction | Scan     | Source File                                | Area ebraeus | Area judaeus | #Feature | #Feature ebraeus | #Feature judaeus | Start | End | PTM | AScore | Found By |
|------------------|------|--------|-----------|--------|------|----------|---|-------|----------|----------|--------------------------------------------|--------------|--------------|----------|------------------|------------------|-------|-----|-----|--------|----------|
| K.HEQYMEVR.E     | Y    | 70.43  | 1219.5292 | 9      | -0.1 | 610.7692 | 2 | 18.53 | 2        | F2:63972 | 20210611-09_2021021-OK160A_816_5.3.236.mgf |              | 0            | 0        | 0                | 0                | 146   | 154 |     |        | PEAKS DB |
| total 1 peptides |      |        |           |        |      |          |   |       |          |          |                                            |              |              |          |                  |                  |       |     |     |        |          |

K\_0010\_081\_Rimp

[back to list](#)

| [Protein Coverage](#) | [Supporting Peptides](#) |

Protein Coverage:

1 IYYPNGRPIG PCSTNDISK T EVFSIRNARW ELHYSYCTCA SGEDYIEAED RTTSSTTVSY KIYECGMPTY SCSGGTFPVT  
81 DADDGPRRMQ CTCGQYK YFV SPTLGWHVR C

Supporting Peptides:

| Peptide           | Uniq | -10lgP | Mass      | Length | ppm | m/z      | z | RT    | Fraction | Scan     | Source File                                | Area ebraeus | Area judaeus | #Feature | #Feature ebraeus | #Feature judaeus | Start | End | PTM | AScore | Found By |
|-------------------|------|--------|-----------|--------|-----|----------|---|-------|----------|----------|--------------------------------------------|--------------|--------------|----------|------------------|------------------|-------|-----|-----|--------|----------|
| K.YFVSPITLGWHVR.C | Y    | 69.05  | 1460.7565 | 12     | 0.8 | 487.9246 | 3 | 42.46 | 1        | F1:40238 | 20210611-08_2021021-OK192A_815_5.3.236.mgf | 0            |              | 0        | 0                | 0                | 98    | 109 |     |        | PEAKS DB |
| total 1 peptides  |      |        |           |        |     |          |   |       |          |          |                                            |              |              |          |                  |                  |       |     |     |        |          |

OK006\_E\_029\_Conkunitzin

[back to list](#)

| [Protein Coverage](#) | [Supporting Peptides](#) |

Protein Coverage:

1 GACEKPKVEG TGSQSISSYF FNSASGTCDT FVYK GGNDP FPNR FNSHPV CENVCKCKLR MDPGTGERLR TRYHNTDGS  
81 RCLPFQYRG T GGNANNFLSE SACEMECEL

Supporting Peptides:

| Peptide          | Uniq | -10lgP | Mass      | Length | ppm | m/z      | z | RT    | Fraction | Scan     | Source File                                | Area ebraeus | Area judaeus | #Feature | #Feature ebraeus | #Feature judaeus | Start | End | PTM | AScore | Found By |
|------------------|------|--------|-----------|--------|-----|----------|---|-------|----------|----------|--------------------------------------------|--------------|--------------|----------|------------------|------------------|-------|-----|-----|--------|----------|
| K.GGNDPFPNRF     | Y    | 69.01  | 1087.4683 | 10     | 1.1 | 544.7399 | 2 | 22.11 | 1        | F1:14025 | 20210611-08_2021021-OK192A_815_5.3.236.mgf | 0            |              | 0        | 0                | 0                | 35    | 44  |     |        | PEAKS DB |
| total 1 peptides |      |        |           |        |     |          |   |       |          |          |                                            |              |              |          |                  |                  |       |     |     |        |          |

OK193\_E\_027\_Conkunitzin

[back to list](#)

| [Protein Coverage](#) | [Supporting Peptides](#) |

Protein Coverage:

1 GACEKPKVEG TGSQSISSYF FNSASGTCDT FVYK**GGNDDP FPNR**FNSHPV CENVCKCKLR MDPGTGERLR TRYHNTDGS

81 RCLPFQYRGT GGNANNFLSE SACEMECEL

Supporting Peptides:

| Peptide          | Uniq | -10lgP | Mass      | Length | ppm | m/z      | z | RT    | Fraction | Scan     | Source File                                | Area ebraeus | Area judaeus | #Feature | #Feature ebraeus | #Feature judaeus | Start | End | PTM | AScore | Found By |
|------------------|------|--------|-----------|--------|-----|----------|---|-------|----------|----------|--------------------------------------------|--------------|--------------|----------|------------------|------------------|-------|-----|-----|--------|----------|
| K.GGNDDPFPNR.F   | Y    | 69.01  | 1087.4683 | 10     | 1.1 | 544.7399 | 2 | 22.11 | 1        | F1:14025 | 20210611-08_2021021-OK192A_815_5.3.236.mgf | 0            |              | 0        | 0                | 0                | 35    | 44  |     |        | PEAKS DB |
| total 1 peptides |      |        |           |        |     |          |   |       |          |          |                                            |              |              |          |                  |                  |       |     |     |        |          |

CebrOK016\_E\_012\_Conkunitzin

[back to list](#)

| [Protein Coverage](#) | [Supporting Peptides](#) |

Protein Coverage:

1 GACEKPKVEG TGSQSISSYF FNSASGTCDT FVYK**GGNDDP FPNR**FNSHPV CENVCKCKLR MDPGTGERLR TRYHNTDGS

81 RCLPFQYRGT GGNANNFLSE SACEMECEL

Supporting Peptides:

| Peptide          | Uniq | -10lgP | Mass      | Length | ppm | m/z      | z | RT    | Fraction | Scan     | Source File                                | Area ebraeus | Area judaeus | #Feature | #Feature ebraeus | #Feature judaeus | Start | End | PTM | AScore | Found By |
|------------------|------|--------|-----------|--------|-----|----------|---|-------|----------|----------|--------------------------------------------|--------------|--------------|----------|------------------|------------------|-------|-----|-----|--------|----------|
| K.GGNDDPFPNR.F   | Y    | 69.01  | 1087.4683 | 10     | 1.1 | 544.7399 | 2 | 22.11 | 1        | F1:14025 | 20210611-08_2021021-OK192A_815_5.3.236.mgf | 0            |              | 0        | 0                | 0                | 35    | 44  |     |        | PEAKS DB |
| total 1 peptides |      |        |           |        |     |          |   |       |          |          |                                            |              |              |          |                  |                  |       |     |     |        |          |

SRX1323887\_E\_028\_Conkunitzin

[back to list](#)

| [Protein Coverage](#) | [Supporting Peptides](#) |

Protein Coverage:

1 GACEKPKVEG TGSQSISSYF FNSASGTCDT FVYK**GGNDDP FPNR**FNSHPV CENVCKCKLR MDPGTGERLR TRYHNTDGS

81 RCLPFQYRGT GGNANNFLSE SACEMECEL

Supporting Peptides:

| Peptide          | Uniq | -10lgP | Mass      | Length | ppm | m/z      | z | RT    | Fraction | Scan     | Source File                                | Area ebraeus | Area judaeus | #Feature | #Feature ebraeus | #Feature judaeus | Start | End | PTM | AScore | Found By |
|------------------|------|--------|-----------|--------|-----|----------|---|-------|----------|----------|--------------------------------------------|--------------|--------------|----------|------------------|------------------|-------|-----|-----|--------|----------|
| K.GGNDDPFPNR.F   | Y    | 69.01  | 1087.4683 | 10     | 1.1 | 544.7399 | 2 | 22.11 | 1        | F1:14025 | 20210611-08_2021021-OK192A_815_5.3.236.mgf | 0            |              | 0        | 0                | 0                | 35    | 44  |     |        | PEAKS DB |
| total 1 peptides |      |        |           |        |     |          |   |       |          |          |                                            |              |              |          |                  |                  |       |     |     |        |          |

OK213\_E\_033\_Conkunitzin

[back to list](#)

| [Protein Coverage](#) | [Supporting Peptides](#) |

Protein Coverage:

1 MTPSTSVLHL SFITPYCCSL HPERNMDALR FSAVLLILAM ACFITVSAGA CEKPKVEGTG SQSISSYFFN SASGTCDTFV

81 YK**GGNDDFPP NR**FNSHPVCE NVCKCKLRMD PGTGERLRLR YYHNTDGSRC LPFQYRGTGG NANNFLSESA CEMECEL

Supporting Peptides:

| Peptide          | Uniq | -10lgP | Mass      | Length | ppm | m/z      | z | RT    | Fraction | Scan     | Source File                                | Area ebraeus | Area judaeus | #Feature | #Feature ebraeus | #Feature judaeus | Start | End | PTM | AScore | Found By |
|------------------|------|--------|-----------|--------|-----|----------|---|-------|----------|----------|--------------------------------------------|--------------|--------------|----------|------------------|------------------|-------|-----|-----|--------|----------|
| K.GGNDDPFPNR.F   | Y    | 69.01  | 1087.4683 | 10     | 1.1 | 544.7399 | 2 | 22.11 | 1        | F1:14025 | 20210611-08_2021021-OK192A_815_5.3.236.mgf | 0            |              | 0        | 0                | 0                | 83    | 92  |     |        | PEAKS DB |
| total 1 peptides |      |        |           |        |     |          |   |       |          |          |                                            |              |              |          |                  |                  |       |     |     |        |          |

OK212\_J\_201\_T

[back to list](#)

| [Protein Coverage](#) | [Supporting Peptides](#) |

Protein Coverage:

1 **AALGDADLK**G LTGVFYHRCC HFP

Supporting Peptides:

| Peptide          | Uniq | -10lgP | Mass     | Length | ppm | m/z      | z | RT    | Fraction | Scan     | Source File                                | Area ebraeus | Area judaeus | #Feature | #Feature ebraeus | #Feature judaeus | Start | End | PTM | AScore | Found By |
|------------------|------|--------|----------|--------|-----|----------|---|-------|----------|----------|--------------------------------------------|--------------|--------------|----------|------------------|------------------|-------|-----|-----|--------|----------|
| AALGDADLK.G      | Y    | 66.91  | 872.4603 | 9      | 2.0 | 437.2365 | 2 | 24.13 | 2        | F2:73310 | 20210611-09_2021021-OK160A_816_5.3.236.mgf |              | 0            | 0        | 0                | 0                | 1     | 9   |     |        | PEAKS DB |
| total 1 peptides |      |        |          |        |     |          |   |       |          |          |                                            |              |              |          |                  |                  |       |     |     |        |          |

D\_092\_FK506-binding

[back to list](#)

| [Protein Coverage](#) | [Supporting Peptides](#) |

Protein Coverage:

1 MVSRRNAVKT SVLLLLCSLG GVSRADETEE ELINEVIFKP ETCDRLSKAH DMLSMHYTGT LTATGVKFDS SHDRNQPFEE

81 QLGVGQVIQG WEKGLDMCV GEKRKLIIPS HLGYGDAQAG EMIPPKSSLT FEVELLNICK GTTPQNIFKE IDTNEDKLLS

161 **KEEISGFLKE** QAQKAGPGSG LTDEHHEKII TEIFEHEDKD KDGFIHKEF SGPKHDEL

Supporting Peptides:

| Peptide          | Uniq | -10lgP | Mass     | Length | ppm  | m/z      | z | RT    | Fraction | Scan     | Source File                                | Area ebraeus | Area judaeus | #Feature | #Feature ebraeus | #Feature judaeus | Start | End | PTM | AScore | Found By |
|------------------|------|--------|----------|--------|------|----------|---|-------|----------|----------|--------------------------------------------|--------------|--------------|----------|------------------|------------------|-------|-----|-----|--------|----------|
| K.EEISGFLK.E     | Y    | 66.80  | 921.4807 | 8      | -0.4 | 461.7455 | 2 | 34.49 | 2        | F2:91692 | 20210611-09_2021021-OK160A_816_5.3.236.mgf | 0            | 0            | 0        | 0                | 0                | 162   | 169 |     |        | PEAKS DB |
| total 1 peptides |      |        |          |        |      |          |   |       |          |          |                                            |              |              |          |                  |                  |       |     |     |        |          |

SRX1323887\_E\_137\_P

[back to list](#)

| [Protein Coverage](#) | [Supporting Peptides](#) |

Protein Coverage:

1 **ESSSLVLCRS** PCSAVRFCPP TCSYCEGTPQ IC

Supporting Peptides:

| Peptide             | Uniq | -10lgP | Mass      | Length | ppm | m/z      | z | RT    | Fraction | Scan     | Source File                                | Area ebraeus | Area judaeus | #Feature | #Feature ebraeus | #Feature judaeus | Start | End | PTM | AScore | Found By                                 |
|---------------------|------|--------|-----------|--------|-----|----------|---|-------|----------|----------|--------------------------------------------|--------------|--------------|----------|------------------|------------------|-------|-----|-----|--------|------------------------------------------|
| ESSSLVLC(+57.02).RS | Y    | 66.31  | 1049.5176 | 9      | 2.8 | 525.7656 | 2 | 25.17 | 1        | F1:18696 | 20210611-08_2021021-OK192A_815_5.3.236.mgf | 0            |              | 0        | 0                | 0                | 1     | 9   |     |        | C8:Carbamidomethylation:1000.00 PEAKS DB |
| total 1 peptides    |      |        |           |        |     |          |   |       |          |          |                                            |              |              |          |                  |                  |       |     |     |        |                                          |

gene:107290974

[back to list](#)

| [Protein Coverage](#) | [Supporting Peptides](#) |

Protein Coverage:

1 MLGFAGRCCA SSASFLLRGA RGASSPLQDL LQLRGGVVAA AAEARRNYAA QTAPAAKAGT ATGHIVAVIG AVVDVQFDEA  
81 LPPILNALEV QGRDTRLVLE VAQHLGENTV RTIAMDGTEG LVRGQKVLDG GAPIRIPVGP ETLGRIMNVI GEPIDERGPI  
161 KTKQFAAIIH EAPEFVEMSV EQEILVTGIK VVDLLAPYAK GGR**IGLFGGA GVGK**TVLIME LINNVAKAHG GYSVFAGVGE  
  
241 RTREGNDLYH EMIESGVINL KDTTSKVALV YGQMNEPPGA RARVALTGLT VAEYFRDQEG QDVLLFIDNI FRFTQAGSEV  
321 SALLGRIPSA VGYQPTLATD MGTMQERITT TRKGSITSVQ AIYVPADDLT DPAPATTFAH LDATTVLSRA IAE LGIYPAV  
401 DPLDSTSRIM DPNIVGQEHY DVARGVQKIL QDYKSLQDII AILGMDELSE EDKLTVARAR KIQRFLSQPF QVAEVTGHA  
481 GKLVLKETI KGFQQILIGE YDHLPEQAFY MVGPIEEAVA KAEKLAEHS

Supporting Peptides:

| Peptide         | Uniq | -10lgP | Mass     | Length | ppm | m/z      | z | RT    | Fraction | Scan     | Source File                                | Area ebraeus | Area judaeus | #Feature | #Feature ebraeus | #Feature judaeus | Start | End | PTM | AScore | Found By |
|-----------------|------|--------|----------|--------|-----|----------|---|-------|----------|----------|--------------------------------------------|--------------|--------------|----------|------------------|------------------|-------|-----|-----|--------|----------|
| K.IGLFGGAGVGK.T | Y    | 65.83  | 974.5549 | 11     | 0.9 | 488.2831 | 2 | 36.87 | 2        | F2:95816 | 20210611-09_2021021-OK160A_816_5.3.236.mgf |              | 0            | 0        | 0                | 0                | 204   | 214 |     |        | PEAKS DB |

total 1 peptides

OK214\_J\_257\_Cver07

[back to list](#)

| [Protein Coverage](#) | [Supporting Peptides](#) |

Protein Coverage:

1 SPLFCNTTKV EKLQARDLIG NVYMR**LANLP DEGTR**SQLGF KLSVTEINGK ENLNLQVFFW KHGTCSSWFS DCVVNDNYCE  
81 YSSGRKIYFI FHNEDYDVTF GTPGNTVKIL TRYTGGSRID VEKLPQDMLS TIADKCDMEV ITNAFYTRRF DPWYTAPTCD  
161 KPQLSFSFSI HLFKSFSKTF I

Supporting Peptides:

| Peptide        | Uniq | -10lgP | Mass      | Length | ppm | m/z      | z | RT    | Fraction | Scan     | Source File                                | Area ebraeus | Area judaeus | #Feature | #Feature ebraeus | #Feature judaeus | Start | End | PTM | AScore | Found By |
|----------------|------|--------|-----------|--------|-----|----------|---|-------|----------|----------|--------------------------------------------|--------------|--------------|----------|------------------|------------------|-------|-----|-----|--------|----------|
| R.LANLPDEGTR.S | Y    | 65.46  | 1084.5513 | 10     | 1.0 | 543.2812 | 2 | 23.80 | 2        | F2:72699 | 20210611-09_2021021-OK160A_816_5.3.236.mgf |              | 0            | 0        | 0                | 0                | 26    | 35  |     |        | PEAKS DB |

total 1 peptides

gene:107293638

[back to list](#)

| [Protein Coverage](#) | [Supporting Peptides](#) |

Protein Coverage:

1 MTAIGGQAGY IYPRSDSAAFLFDLREAFI RRCHLVSCRC FKGKLTMSGG LDVLQMKEED VLKFLAAGTH LGGTNLDFQM  
81 EQYIYKRKSD GIYIINLKRT WEKLLLAARA IVAIENPADV SVISSRNTGQ RAVLKFAAAT GATPIAGRFT PGFTTNQIQ  
161 AFRFPR**LLVV TDFR**ADHQPL TEASYVNIPT IALCNTDSPL RYVDIAIPCN NKGHSVGLM WWMLAREVLR MRGTISRHP  
  
241 WEVMPDLYFY RDPFEEIEKEE QAAADKAVTK EEFQGEWTAP APEFTAPPQF EVSDWSEGVQ VPSVPIQPYP TEDWSSQTAT  
321 EDWSAAPTQ ATEWVGTE WS

Supporting Peptides:

| Peptide      | Uniq | -10lgP | Mass     | Length | ppm | m/z      | z | RT    | Fraction | Scan     | Source File                                | Area ebraeus | Area judaeus | #Feature | #Feature ebraeus | #Feature judaeus | Start | End | PTM | AScore | Found By |
|--------------|------|--------|----------|--------|-----|----------|---|-------|----------|----------|--------------------------------------------|--------------|--------------|----------|------------------|------------------|-------|-----|-----|--------|----------|
| R.LLVVTDPR.A | Y    | 65.35  | 911.5440 | 8      | 3.6 | 456.7790 | 2 | 29.59 | 2        | F2:82621 | 20210611-09_2021021-OK160A_816_5.3.236.mgf |              | 0            | 0        | 0                | 0                | 167   | 174 |     |        | PEAKS DB |

total 1 peptides

SRX1323887\_E\_222\_Conorfamide

[back to list](#)

| [Protein Coverage](#) | [Supporting Peptides](#) |

Protein Coverage:

1 MSGSGFLLLA LLLLGTEVAT KVEQEKKGMQ TDQLIK**FYDP LPR**LGRQNMQ SPLFSERLRT RALGFRQLSS QKQ

Supporting Peptides:

| Peptide     | Uniq | -10lgP | Mass     | Length | ppm | m/z      | z | RT    | Fraction | Scan     | Source File                                | Area ebraeus | Area judaeus | #Feature | #Feature ebraeus | #Feature judaeus | Start | End | PTM | AScore | Found By |
|-------------|------|--------|----------|--------|-----|----------|---|-------|----------|----------|--------------------------------------------|--------------|--------------|----------|------------------|------------------|-------|-----|-----|--------|----------|
| K.FYDPLPR.L | Y    | 63.04  | 906.4599 | 7      | 0.8 | 454.2359 | 2 | 35.96 | 1        | F1:32988 | 20210611-08_2021021-OK192A_815_5.3.236.mgf | 0            |              | 0        | 0                | 0                | 37    | 43  |     |        | PEAKS DB |

total 1 peptides

OK213\_E\_288\_Conorfamide

[back to list](#)

| [Protein Coverage](#) | [Supporting Peptides](#) |

Protein Coverage:

1 MSGSGFLLLA LLLLGTEVAT KVEQEKKGMQ TDQLIK**FYDP LPR**LGRQNMQ SPLFSERLRT RALGFRQLSS QKQ

Supporting Peptides:

| Peptide     | Uniq | -10lgP | Mass     | Length | ppm | m/z      | z | RT    | Fraction | Scan     | Source File                                | Area ebraeus | Area judaeus | #Feature | #Feature ebraeus | #Feature judaeus | Start | End | PTM | AScore | Found By |
|-------------|------|--------|----------|--------|-----|----------|---|-------|----------|----------|--------------------------------------------|--------------|--------------|----------|------------------|------------------|-------|-----|-----|--------|----------|
| K.FYDPLPR.L | Y    | 63.04  | 906.4599 | 7      | 0.8 | 454.2359 | 2 | 35.96 | 1        | F1:32988 | 20210611-08_2021021-OK192A_815_5.3.236.mgf | 0            |              | 0        | 0                | 0                | 37    | 43  |     |        | PEAKS DB |

total 1 peptides

OK193\_E\_242\_Conorfamide

[back to list](#)

| [Protein Coverage](#) | [Supporting Peptides](#) |

Protein Coverage:

1 MSGSGFLLLA LLLLGTEVAT KVEQEKKGMQ TDQLIK**FYDP LPR**LGRQNMQ SPLFSERLRT RALGFRQLSS QKQ

Supporting Peptides:

| Peptide     | Uniq | -10lgP | Mass     | Length | ppm | m/z      | z | RT    | Fraction | Scan     | Source File                                | Area ebraeus | Area judaeus | #Feature | #Feature ebraeus | #Feature judaeus | Start | End | PTM | AScore | Found By |
|-------------|------|--------|----------|--------|-----|----------|---|-------|----------|----------|--------------------------------------------|--------------|--------------|----------|------------------|------------------|-------|-----|-----|--------|----------|
| K.FYDPLPR.L | Y    | 63.04  | 906.4599 | 7      | 0.8 | 454.2359 | 2 | 35.96 | 1        | F1:32988 | 20210611-08_2021021-OK192A_815_5.3.236.mgf | 0            |              | 0        | 0                | 0                | 37    | 43  |     |        | PEAKS DB |

total 1 peptides

V\_1258\_138\_Q-4

[back to list](#)

| [Protein Coverage](#) | [Supporting Peptides](#) |

Protein Coverage:

1 SLCKTMVCGV ACCPTTNCRC **LVGAQHFR**Q SVCVC

Supporting Peptides:

| Peptide      | Uniq | -10lgP | Mass     | Length | ppm | m/z      | z | RT    | Fraction | Scan    | Source File                                | Area ebraeus | Area judaeus | #Feature | #Feature ebraeus | #Feature judaeus | Start | End | PTM | AScore | Found By |
|--------------|------|--------|----------|--------|-----|----------|---|-------|----------|---------|--------------------------------------------|--------------|--------------|----------|------------------|------------------|-------|-----|-----|--------|----------|
| K.LVGAQHFR.Q | Y    | 62.05  | 926.5086 | 8      | 3.0 | 464.2612 | 2 | 17.01 | 1        | F1:8355 | 20210611-08_2021021-OK192A_815_5.3.236.mgf | 0            |              | 0        | 0                | 0                | 22    | 29  |     |        | PEAKS DB |

total 1 peptides

V\_CG13\_043\_Q-4

[back to list](#)

| [Protein Coverage](#) | [Supporting Peptides](#) |

Protein Coverage:

1 SSCQTMVCGV ACCEPTNCRC KLVGAQHFRK SVCVC

Supporting Peptides:

| Peptide          | Uniq | -10lgP | Mass     | Length | ppm | m/z      | z | RT    | Fraction | Scan    | Source File                                | Area ebraeus | Area judaeus | #Feature | #Feature ebraeus | #Feature judaeus | Start | End | PTM | AScore | Found By |
|------------------|------|--------|----------|--------|-----|----------|---|-------|----------|---------|--------------------------------------------|--------------|--------------|----------|------------------|------------------|-------|-----|-----|--------|----------|
| K.LVGAQHFR.K     | Y    | 62.05  | 926.5086 | 8      | 3.0 | 464.2612 | 2 | 17.01 | 1        | F1:8355 | 20210611-08_2021021-OK192A_815_5.3.236.mgf | 0            |              | 0        | 0                | 0                | 22    | 29  |     |        | PEAKS DB |
| total 1 peptides |      |        |          |        |     |          |   |       |          |         |                                            |              |              |          |                  |                  |       |     |     |        |          |

gene:107297725

[back to list](#)

| [Protein Coverage](#) | [Supporting Peptides](#) |

Protein Coverage:

1 MEQAEAHNGS GAEEAPTAGT RPPATAEGMA LAYGSLVUMA LLPIFFGALR SVTCAKGKNA SDMPETITSR DAARFPIVAS  
81 CTLLGLYLFF KIFSQEYINL LLSMYFFVLG ILALSHTISP MMNKFFPVNF PNKQYQLLFT QGSGEAKEEI VNYEFDTKDL  
161 VCLAMSSIVG VWYLLRKHWI ANNLFGLAFS LNGVELLHLN NVSTGCILLG GLFVYDVFWV FGTNVMVTVA KSFEAPIKLV  
241 FPQDLLEKGL EADNFAMLGL GDIVIPGIFI ALLLRFDISL KKNTHTYFYT SFVAYILGLS LTIFIMHVFK HAQPALLYLV  
321 PACIGFPLLV ALAKGEVTDV FSYEENATSK EVTGDPKEEK TETDPEKKEK

Supporting Peptides:

| Peptide          | Uniq | -10lgP | Mass     | Length | ppm | m/z      | z | RT    | Fraction | Scan     | Source File                                | Area ebraeus | Area judaeus | #Feature | #Feature ebraeus | #Feature judaeus | Start | End | PTM | AScore | Found By |
|------------------|------|--------|----------|--------|-----|----------|---|-------|----------|----------|--------------------------------------------|--------------|--------------|----------|------------------|------------------|-------|-----|-----|--------|----------|
| K.SFEAPIK.L      | Y    | 61.56  | 790.4225 | 7      | 4.1 | 396.2185 | 2 | 25.41 | 2        | F2:75555 | 20210611-09_2021021-OK160A_816_5.3.236.mgf |              | 0            | 0        | 0                | 0                | 232   | 238 |     |        | PEAKS DB |
| total 1 peptides |      |        |          |        |     |          |   |       |          |          |                                            |              |              |          |                  |                  |       |     |     |        |          |

OK006\_E\_160\_O2

[back to list](#)

| [Protein Coverage](#) | [Supporting Peptides](#) |

Protein Coverage:

1 CHTNGERCIS DAQCCSNYCR HTSDYVVSR RSLT

Supporting Peptides:

| Peptide          | Uniq | -10lgP | Mass      | Length | ppm | m/z      | z | RT    | Fraction | Scan    | Source File                                | Area ebraeus | Area judaeus | #Feature | #Feature ebraeus | #Feature judaeus | Start | End | PTM | AScore | Found By |
|------------------|------|--------|-----------|--------|-----|----------|---|-------|----------|---------|--------------------------------------------|--------------|--------------|----------|------------------|------------------|-------|-----|-----|--------|----------|
| R.HTSDYVVS.R.C   | Y    | 61.28  | 1062.5094 | 9      | 0.2 | 532.2601 | 2 | 14.36 | 1        | F1:5671 | 20210611-08_2021021-OK192A_815_5.3.236.mgf | 0            |              | 0        | 0                | 0                | 21    | 29  |     |        | PEAKS DB |
| total 1 peptides |      |        |           |        |     |          |   |       |          |         |                                            |              |              |          |                  |                  |       |     |     |        |          |

OK006\_E\_159\_O2

[back to list](#)

| [Protein Coverage](#) | [Supporting Peptides](#) |

Protein Coverage:

1 CHTNGQWCIA DAQCCSNYCR HTSDYVVSR RSLT

Supporting Peptides:

| Peptide          | Uniq | -10lgP | Mass      | Length | ppm | m/z      | z | RT    | Fraction | Scan    | Source File                                | Area ebraeus | Area judaeus | #Feature | #Feature ebraeus | #Feature judaeus | Start | End | PTM | AScore | Found By |
|------------------|------|--------|-----------|--------|-----|----------|---|-------|----------|---------|--------------------------------------------|--------------|--------------|----------|------------------|------------------|-------|-----|-----|--------|----------|
| R.HTSDYVVS.R.C   | Y    | 61.28  | 1062.5094 | 9      | 0.2 | 532.2601 | 2 | 14.36 | 1        | F1:5671 | 20210611-08_2021021-OK192A_815_5.3.236.mgf | 0            |              | 0        | 0                | 0                | 21    | 29  |     |        | PEAKS DB |
| total 1 peptides |      |        |           |        |     |          |   |       |          |         |                                            |              |              |          |                  |                  |       |     |     |        |          |

OK212\_J\_105\_M

[back to list](#)

| [Protein Coverage](#) | [Supporting Peptides](#) |

Protein Coverage:

1 MTLLEDGCC TRPRCTGACS CCQD

Supporting Peptides:

| Peptide                         | Uniq | -10lgP | Mass      | Length | ppm | m/z      | z | RT    | Fraction | Scan     | Source File                                | Area ebraeus | Area judaeus | #Feature | #Feature ebraeus | #Feature judaeus | Start | End | PTM | AScore                                                           | Found By |
|---------------------------------|------|--------|-----------|--------|-----|----------|---|-------|----------|----------|--------------------------------------------|--------------|--------------|----------|------------------|------------------|-------|-----|-----|------------------------------------------------------------------|----------|
| MTLLEDGC(+57.02)C(+57.02)TRPR.C | Y    | 61.19  | 1720.8059 | 14     | 1.0 | 574.6074 | 3 | 33.87 | 2        | F2:90467 | 20210611-09_2021021-OK160A_816_5.3.236.mgf |              | 0            | 0        | 0                | 0                | 1     | 14  |     | C9:Carbamidomethylation:1000.00;C10:Carbamidomethylation:1000.00 | PEAKS DB |
| total 1 peptides                |      |        |           |        |     |          |   |       |          |          |                                            |              |              |          |                  |                  |       |     |     |                                                                  |          |

OK213\_E\_106\_M

[back to list](#)

| [Protein Coverage](#) | [Supporting Peptides](#) |

Protein Coverage:

1 MTLLEDGCC TRPRCTGACS CCQD

Supporting Peptides:

| Peptide                         | Uniq | -10lgP | Mass      | Length | ppm | m/z      | z | RT    | Fraction | Scan     | Source File                                | Area ebraeus | Area judaeus | #Feature | #Feature ebraeus | #Feature judaeus | Start | End | PTM | AScore                                                           | Found By |
|---------------------------------|------|--------|-----------|--------|-----|----------|---|-------|----------|----------|--------------------------------------------|--------------|--------------|----------|------------------|------------------|-------|-----|-----|------------------------------------------------------------------|----------|
| MTLLEDGC(+57.02)C(+57.02)TRPR.C | Y    | 61.19  | 1720.8059 | 14     | 1.0 | 574.6074 | 3 | 33.87 | 2        | F2:90467 | 20210611-09_2021021-OK160A_816_5.3.236.mgf |              | 0            | 0        | 0                | 0                | 1     | 14  |     | C9:Carbamidomethylation:1000.00;C10:Carbamidomethylation:1000.00 | PEAKS DB |
| total 1 peptides                |      |        |           |        |     |          |   |       |          |          |                                            |              |              |          |                  |                  |       |     |     |                                                                  |          |

OK212\_J\_104\_M

[back to list](#)

| [Protein Coverage](#) | [Supporting Peptides](#) |

Protein Coverage:

1 MTLLEDGCC TRPRCTGACS CCQD

Supporting Peptides:

| Peptide                         | Uniq | -10lgP | Mass      | Length | ppm | m/z      | z | RT    | Fraction | Scan     | Source File                                | Area ebraeus | Area judaeus | #Feature | #Feature ebraeus | #Feature judaeus | Start | End | PTM | AScore                                                           | Found By |
|---------------------------------|------|--------|-----------|--------|-----|----------|---|-------|----------|----------|--------------------------------------------|--------------|--------------|----------|------------------|------------------|-------|-----|-----|------------------------------------------------------------------|----------|
| MTLLEDGC(+57.02)C(+57.02)TRPR.C | Y    | 61.19  | 1720.8059 | 14     | 1.0 | 574.6074 | 3 | 33.87 | 2        | F2:90467 | 20210611-09_2021021-OK160A_816_5.3.236.mgf |              | 0            | 0        | 0                | 0                | 1     | 14  |     | C9:Carbamidomethylation:1000.00;C10:Carbamidomethylation:1000.00 | PEAKS DB |
| total 1 peptides                |      |        |           |        |     |          |   |       |          |          |                                            |              |              |          |                  |                  |       |     |     |                                                                  |          |

OK006\_E\_092\_M

[back to list](#)

| [Protein Coverage](#) | [Supporting Peptides](#) |

Protein Coverage:

1 [MTLLLEDGCC TRPR](#)CTGACS CCQD

Supporting Peptides:

| Peptide                          | Uniq | -10lgP | Mass      | Length | ppm | m/z      | z | RT    | Fraction | Scan     | Source File                                | Area ebraeus | Area judaeus | #Feature | #Feature ebraeus | #Feature judaeus | Start | End | PTM | AScore                                                           | Found By |
|----------------------------------|------|--------|-----------|--------|-----|----------|---|-------|----------|----------|--------------------------------------------|--------------|--------------|----------|------------------|------------------|-------|-----|-----|------------------------------------------------------------------|----------|
| MTLLLEDGC(+57.02)C(+57.02)TRPR.C | Y    | 61.19  | 1720.8059 | 14     | 1.0 | 574.6074 | 3 | 33.87 | 2        | F2:90467 | 20210611-09_2021021-OK160A_816_5.3.236.mgf |              | 0            | 0        | 0                | 0                | 1     | 14  |     | C9:Carbamidomethylation:1000.00;C10:Carbamidomethylation:1000.00 | PEAKS DB |
| total 1 peptides                 |      |        |           |        |     |          |   |       |          |          |                                            |              |              |          |                  |                  |       |     |     |                                                                  |          |

OK212\_J\_106\_M

[back to list](#)

| [Protein Coverage](#) | [Supporting Peptides](#) |

Protein Coverage:

1 [MTLLLEDGCC TRPR](#)CTGACS CCQD

Supporting Peptides:

| Peptide                          | Uniq | -10lgP | Mass      | Length | ppm | m/z      | z | RT    | Fraction | Scan     | Source File                                | Area ebraeus | Area judaeus | #Feature | #Feature ebraeus | #Feature judaeus | Start | End | PTM | AScore                                                           | Found By |
|----------------------------------|------|--------|-----------|--------|-----|----------|---|-------|----------|----------|--------------------------------------------|--------------|--------------|----------|------------------|------------------|-------|-----|-----|------------------------------------------------------------------|----------|
| MTLLLEDGC(+57.02)C(+57.02)TRPR.C | Y    | 61.19  | 1720.8059 | 14     | 1.0 | 574.6074 | 3 | 33.87 | 2        | F2:90467 | 20210611-09_2021021-OK160A_816_5.3.236.mgf |              | 0            | 0        | 0                | 0                | 1     | 14  |     | C9:Carbamidomethylation:1000.00;C10:Carbamidomethylation:1000.00 | PEAKS DB |
| total 1 peptides                 |      |        |           |        |     |          |   |       |          |          |                                            |              |              |          |                  |                  |       |     |     |                                                                  |          |

CebrOK033\_J\_077\_M

[back to list](#)

| [Protein Coverage](#) | [Supporting Peptides](#) |

Protein Coverage:

1 [MTLLLEDGCC TRPR](#)CTGACS CCQD

Supporting Peptides:

| Peptide                          | Uniq | -10lgP | Mass      | Length | ppm | m/z      | z | RT    | Fraction | Scan     | Source File                                | Area ebraeus | Area judaeus | #Feature | #Feature ebraeus | #Feature judaeus | Start | End | PTM | AScore                                                           | Found By |
|----------------------------------|------|--------|-----------|--------|-----|----------|---|-------|----------|----------|--------------------------------------------|--------------|--------------|----------|------------------|------------------|-------|-----|-----|------------------------------------------------------------------|----------|
| MTLLLEDGC(+57.02)C(+57.02)TRPR.C | Y    | 61.19  | 1720.8059 | 14     | 1.0 | 574.6074 | 3 | 33.87 | 2        | F2:90467 | 20210611-09_2021021-OK160A_816_5.3.236.mgf |              | 0            | 0        | 0                | 0                | 1     | 14  |     | C9:Carbamidomethylation:1000.00;C10:Carbamidomethylation:1000.00 | PEAKS DB |
| total 1 peptides                 |      |        |           |        |     |          |   |       |          |          |                                            |              |              |          |                  |                  |       |     |     |                                                                  |          |

OK005\_J\_090\_M

[back to list](#)

| [Protein Coverage](#) | [Supporting Peptides](#) |

Protein Coverage:

1 [MTLLLEDGCC TRPR](#)CTGACS CCQD

Supporting Peptides:

| Peptide                          | Uniq | -10lgP | Mass      | Length | ppm | m/z      | z | RT    | Fraction | Scan     | Source File                                | Area ebraeus | Area judaeus | #Feature | #Feature ebraeus | #Feature judaeus | Start | End | PTM | AScore                                                           | Found By |
|----------------------------------|------|--------|-----------|--------|-----|----------|---|-------|----------|----------|--------------------------------------------|--------------|--------------|----------|------------------|------------------|-------|-----|-----|------------------------------------------------------------------|----------|
| MTLLLEDGC(+57.02)C(+57.02)TRPR.C | Y    | 61.19  | 1720.8059 | 14     | 1.0 | 574.6074 | 3 | 33.87 | 2        | F2:90467 | 20210611-09_2021021-OK160A_816_5.3.236.mgf |              | 0            | 0        | 0                | 0                | 1     | 14  |     | C9:Carbamidomethylation:1000.00;C10:Carbamidomethylation:1000.00 | PEAKS DB |
| total 1 peptides                 |      |        |           |        |     |          |   |       |          |          |                                            |              |              |          |                  |                  |       |     |     |                                                                  |          |

OK212\_J\_101\_M

[back to list](#)

| [Protein Coverage](#) | [Supporting Peptides](#) |

Protein Coverage:

1 [MTLLLEDGCC TRPR](#)CTGACS CCQD

Supporting Peptides:

| Peptide                          | Uniq | -10lgP | Mass      | Length | ppm | m/z      | z | RT    | Fraction | Scan     | Source File                                | Area ebraeus | Area judaeus | #Feature | #Feature ebraeus | #Feature judaeus | Start | End | PTM | AScore                                                           | Found By |
|----------------------------------|------|--------|-----------|--------|-----|----------|---|-------|----------|----------|--------------------------------------------|--------------|--------------|----------|------------------|------------------|-------|-----|-----|------------------------------------------------------------------|----------|
| MTLLLEDGC(+57.02)C(+57.02)TRPR.C | Y    | 61.19  | 1720.8059 | 14     | 1.0 | 574.6074 | 3 | 33.87 | 2        | F2:90467 | 20210611-09_2021021-OK160A_816_5.3.236.mgf |              | 0            | 0        | 0                | 0                | 1     | 14  |     | C9:Carbamidomethylation:1000.00;C10:Carbamidomethylation:1000.00 | PEAKS DB |
| total 1 peptides                 |      |        |           |        |     |          |   |       |          |          |                                            |              |              |          |                  |                  |       |     |     |                                                                  |          |

OK005\_J\_089\_M

[back to list](#)

| [Protein Coverage](#) | [Supporting Peptides](#) |

Protein Coverage:

1 [MTLLLEDGCC TRPR](#)CTGACS CCQD

Supporting Peptides:

| Peptide                          | Uniq | -10lgP | Mass      | Length | ppm | m/z      | z | RT    | Fraction | Scan     | Source File                                | Area ebraeus | Area judaeus | #Feature | #Feature ebraeus | #Feature judaeus | Start | End | PTM | AScore                                                           | Found By |
|----------------------------------|------|--------|-----------|--------|-----|----------|---|-------|----------|----------|--------------------------------------------|--------------|--------------|----------|------------------|------------------|-------|-----|-----|------------------------------------------------------------------|----------|
| MTLLLEDGC(+57.02)C(+57.02)TRPR.C | Y    | 61.19  | 1720.8059 | 14     | 1.0 | 574.6074 | 3 | 33.87 | 2        | F2:90467 | 20210611-09_2021021-OK160A_816_5.3.236.mgf |              | 0            | 0        | 0                | 0                | 1     | 14  |     | C9:Carbamidomethylation:1000.00;C10:Carbamidomethylation:1000.00 | PEAKS DB |
| total 1 peptides                 |      |        |           |        |     |          |   |       |          |          |                                            |              |              |          |                  |                  |       |     |     |                                                                  |          |

OK214\_J\_092\_M

[back to list](#)

| [Protein Coverage](#) | [Supporting Peptides](#) |

Protein Coverage:

1 [MTLLLEDGCC TRPR](#)CTGACS CCQD

Supporting Peptides:

| Peptide                          | Uniq | -10lgP | Mass      | Length | ppm | m/z      | z | RT    | Fraction | Scan     | Source File                                | Area ebraeus | Area judaeus | #Feature | #Feature ebraeus | #Feature judaeus | Start | End | PTM | AScore                                                           | Found By |
|----------------------------------|------|--------|-----------|--------|-----|----------|---|-------|----------|----------|--------------------------------------------|--------------|--------------|----------|------------------|------------------|-------|-----|-----|------------------------------------------------------------------|----------|
| MTLLLEDGC(+57.02)C(+57.02)TRPR.C | Y    | 61.19  | 1720.8059 | 14     | 1.0 | 574.6074 | 3 | 33.87 | 2        | F2:90467 | 20210611-09_2021021-OK160A_816_5.3.236.mgf |              | 0            | 0        | 0                | 0                | 1     | 14  |     | C9:Carbamidomethylation:1000.00;C10:Carbamidomethylation:1000.00 | PEAKS DB |
| total 1 peptides                 |      |        |           |        |     |          |   |       |          |          |                                            |              |              |          |                  |                  |       |     |     |                                                                  |          |

OK212\_J\_103\_M

[back to list](#)

| [Protein Coverage](#) | [Supporting Peptides](#) |

Protein Coverage:

1 [MTLLLEDGCC TRPR](#)CTGACS CCQD

Supporting Peptides:



| Peptide | Uniq | -10lgP | Mass | Length | ppm | m/z | z | RT | Fraction | Scan | Source File | Area ebraeus | Area judaeus | #Feature | #Feature ebraeus | #Feature judaeus | Start | End | PTM | AScore | Found By |
|---------|------|--------|------|--------|-----|-----|---|----|----------|------|-------------|--------------|--------------|----------|------------------|------------------|-------|-----|-----|--------|----------|
|---------|------|--------|------|--------|-----|-----|---|----|----------|------|-------------|--------------|--------------|----------|------------------|------------------|-------|-----|-----|--------|----------|

|                                  |   |       |           |    |     |          |   |       |   |          |                                            |  |   |   |   |   |   |    |  |                                                                  |          |
|----------------------------------|---|-------|-----------|----|-----|----------|---|-------|---|----------|--------------------------------------------|--|---|---|---|---|---|----|--|------------------------------------------------------------------|----------|
| MTLLLEDGC(+57.02)C(+57.02)TRPR.C | Y | 61.19 | 1720.8059 | 14 | 1.0 | 574.6074 | 3 | 33.87 | 2 | F2:90467 | 20210611-09_2021021-OK160A_816_5.3.236.mgf |  | 0 | 0 | 0 | 0 | 1 | 14 |  | C9:Carbamidomethylation:1000.00;C10:Carbamidomethylation:1000.00 | PEAKS DB |
| total 1 peptides                 |   |       |           |    |     |          |   |       |   |          |                                            |  |   |   |   |   |   |    |  |                                                                  |          |

OK214\_J\_091\_M

back to list

| [Protein Coverage](#) | [Supporting Peptides](#) |

Protein Coverage:

1 [MTLLLEDGCC TRPR](#)CTGACS CCQD

Supporting Peptides:

| Peptide                          | Uniq | -10lgP | Mass      | Length | ppm | m/z      | z | RT    | Fraction | Scan     | Source File                                | Area ebraeus | Area judaeus | #Feature | #Feature ebraeus | #Feature judaeus | Start | End | PTM | AScore                                                           | Found By |
|----------------------------------|------|--------|-----------|--------|-----|----------|---|-------|----------|----------|--------------------------------------------|--------------|--------------|----------|------------------|------------------|-------|-----|-----|------------------------------------------------------------------|----------|
| MTLLLEDGC(+57.02)C(+57.02)TRPR.C | Y    | 61.19  | 1720.8059 | 14     | 1.0 | 574.6074 | 3 | 33.87 | 2        | F2:90467 | 20210611-09_2021021-OK160A_816_5.3.236.mgf |              | 0            | 0        | 0                | 0                | 1     | 14  |     | C9:Carbamidomethylation:1000.00;C10:Carbamidomethylation:1000.00 | PEAKS DB |
| total 1 peptides                 |      |        |           |        |     |          |   |       |          |          |                                            |              |              |          |                  |                  |       |     |     |                                                                  |          |

OK212\_J\_115\_M

back to list

| [Protein Coverage](#) | [Supporting Peptides](#) |

Protein Coverage:

1 [MTLLLEDGCC TRPR](#)CTGSCS CCQD

Supporting Peptides:

| Peptide                          | Uniq | -10lgP | Mass      | Length | ppm | m/z      | z | RT    | Fraction | Scan     | Source File                                | Area ebraeus | Area judaeus | #Feature | #Feature ebraeus | #Feature judaeus | Start | End | PTM | AScore                                                           | Found By |
|----------------------------------|------|--------|-----------|--------|-----|----------|---|-------|----------|----------|--------------------------------------------|--------------|--------------|----------|------------------|------------------|-------|-----|-----|------------------------------------------------------------------|----------|
| MTLLLEDGC(+57.02)C(+57.02)TRPR.C | Y    | 61.19  | 1720.8059 | 14     | 1.0 | 574.6074 | 3 | 33.87 | 2        | F2:90467 | 20210611-09_2021021-OK160A_816_5.3.236.mgf |              | 0            | 0        | 0                | 0                | 1     | 14  |     | C9:Carbamidomethylation:1000.00;C10:Carbamidomethylation:1000.00 | PEAKS DB |
| total 1 peptides                 |      |        |           |        |     |          |   |       |          |          |                                            |              |              |          |                  |                  |       |     |     |                                                                  |          |

OK212\_J\_102\_M

back to list

| [Protein Coverage](#) | [Supporting Peptides](#) |

Protein Coverage:

1 [MTLLLEDGCC TRPR](#)CTGACS CCQD

Supporting Peptides:

| Peptide                          | Uniq | -10lgP | Mass      | Length | ppm | m/z      | z | RT    | Fraction | Scan     | Source File                                | Area ebraeus | Area judaeus | #Feature | #Feature ebraeus | #Feature judaeus | Start | End | PTM | AScore                                                           | Found By |
|----------------------------------|------|--------|-----------|--------|-----|----------|---|-------|----------|----------|--------------------------------------------|--------------|--------------|----------|------------------|------------------|-------|-----|-----|------------------------------------------------------------------|----------|
| MTLLLEDGC(+57.02)C(+57.02)TRPR.C | Y    | 61.19  | 1720.8059 | 14     | 1.0 | 574.6074 | 3 | 33.87 | 2        | F2:90467 | 20210611-09_2021021-OK160A_816_5.3.236.mgf |              | 0            | 0        | 0                | 0                | 1     | 14  |     | C9:Carbamidomethylation:1000.00;C10:Carbamidomethylation:1000.00 | PEAKS DB |
| total 1 peptides                 |      |        |           |        |     |          |   |       |          |          |                                            |              |              |          |                  |                  |       |     |     |                                                                  |          |

OK214\_J\_090\_M

back to list

| [Protein Coverage](#) | [Supporting Peptides](#) |

Protein Coverage:

1 [MTLLLEDGCC TRPR](#)CTGACS CCQD

Supporting Peptides:

| Peptide                          | Uniq | -10lgP | Mass      | Length | ppm | m/z      | z | RT    | Fraction | Scan     | Source File                                | Area ebraeus | Area judaeus | #Feature | #Feature ebraeus | #Feature judaeus | Start | End | PTM | AScore                                                           | Found By |
|----------------------------------|------|--------|-----------|--------|-----|----------|---|-------|----------|----------|--------------------------------------------|--------------|--------------|----------|------------------|------------------|-------|-----|-----|------------------------------------------------------------------|----------|
| MTLLLEDGC(+57.02)C(+57.02)TRPR.C | Y    | 61.19  | 1720.8059 | 14     | 1.0 | 574.6074 | 3 | 33.87 | 2        | F2:90467 | 20210611-09_2021021-OK160A_816_5.3.236.mgf |              | 0            | 0        | 0                | 0                | 1     | 14  |     | C9:Carbamidomethylation:1000.00;C10:Carbamidomethylation:1000.00 | PEAKS DB |
| total 1 peptides                 |      |        |           |        |     |          |   |       |          |          |                                            |              |              |          |                  |                  |       |     |     |                                                                  |          |

OK212\_J\_109\_M

back to list

| [Protein Coverage](#) | [Supporting Peptides](#) |

Protein Coverage:

1 [MTLLLEDGCC TRPR](#)CTGACS CCQD

Supporting Peptides:

| Peptide                          | Uniq | -10lgP | Mass      | Length | ppm | m/z      | z | RT    | Fraction | Scan     | Source File                                | Area ebraeus | Area judaeus | #Feature | #Feature ebraeus | #Feature judaeus | Start | End | PTM | AScore                                                           | Found By |
|----------------------------------|------|--------|-----------|--------|-----|----------|---|-------|----------|----------|--------------------------------------------|--------------|--------------|----------|------------------|------------------|-------|-----|-----|------------------------------------------------------------------|----------|
| MTLLLEDGC(+57.02)C(+57.02)TRPR.C | Y    | 61.19  | 1720.8059 | 14     | 1.0 | 574.6074 | 3 | 33.87 | 2        | F2:90467 | 20210611-09_2021021-OK160A_816_5.3.236.mgf |              | 0            | 0        | 0                | 0                | 1     | 14  |     | C9:Carbamidomethylation:1000.00;C10:Carbamidomethylation:1000.00 | PEAKS DB |
| total 1 peptides                 |      |        |           |        |     |          |   |       |          |          |                                            |              |              |          |                  |                  |       |     |     |                                                                  |          |

OK212\_J\_108\_M

back to list

| [Protein Coverage](#) | [Supporting Peptides](#) |

Protein Coverage:

1 [MTLLLEDGCC TRPR](#)CTGACS CCQD

Supporting Peptides:

| Peptide                          | Uniq | -10lgP | Mass      | Length | ppm | m/z      | z | RT    | Fraction | Scan     | Source File                                | Area ebraeus | Area judaeus | #Feature | #Feature ebraeus | #Feature judaeus | Start | End | PTM | AScore                                                           | Found By |
|----------------------------------|------|--------|-----------|--------|-----|----------|---|-------|----------|----------|--------------------------------------------|--------------|--------------|----------|------------------|------------------|-------|-----|-----|------------------------------------------------------------------|----------|
| MTLLLEDGC(+57.02)C(+57.02)TRPR.C | Y    | 61.19  | 1720.8059 | 14     | 1.0 | 574.6074 | 3 | 33.87 | 2        | F2:90467 | 20210611-09_2021021-OK160A_816_5.3.236.mgf |              | 0            | 0        | 0                | 0                | 1     | 14  |     | C9:Carbamidomethylation:1000.00;C10:Carbamidomethylation:1000.00 | PEAKS DB |
| total 1 peptides                 |      |        |           |        |     |          |   |       |          |          |                                            |              |              |          |                  |                  |       |     |     |                                                                  |          |

CebrOK035\_J\_095\_M

back to list

| [Protein Coverage](#) | [Supporting Peptides](#) |

Protein Coverage:

1 [MTLLLEDGCC TRPR](#)CTGACS CCQD

Supporting Peptides:

| Peptide                          | Uniq | -10lgP | Mass      | Length | ppm | m/z      | z | RT    | Fraction | Scan     | Source File                                | Area ebraeus | Area judaeus | #Feature | #Feature ebraeus | #Feature judaeus | Start | End | PTM | AScore                                                           | Found By |
|----------------------------------|------|--------|-----------|--------|-----|----------|---|-------|----------|----------|--------------------------------------------|--------------|--------------|----------|------------------|------------------|-------|-----|-----|------------------------------------------------------------------|----------|
| MTLLLEDGC(+57.02)C(+57.02)TRPR.C | Y    | 61.19  | 1720.8059 | 14     | 1.0 | 574.6074 | 3 | 33.87 | 2        | F2:90467 | 20210611-09_2021021-OK160A_816_5.3.236.mgf |              | 0            | 0        | 0                | 0                | 1     | 14  |     | C9:Carbamidomethylation:1000.00;C10:Carbamidomethylation:1000.00 | PEAKS DB |
| total 1 peptides                 |      |        |           |        |     |          |   |       |          |          |                                            |              |              |          |                  |                  |       |     |     |                                                                  |          |

OK212\_J\_087\_M

back to list

| [Protein Coverage](#) | [Supporting Peptides](#) |

Protein Coverage:

1 [MTLLLEDGCC TRPR](#)CTGACS CCQD

Supporting Peptides:

| Peptide                          | Uniq | -10lgP | Mass      | Length | ppm | m/z      | z | RT    | Fraction | Scan     | Source File                                | Area ebraeus | Area judaeus | #Feature | #Feature ebraeus | #Feature judaeus | Start | End | PTM | AScore                                                           | Found By |
|----------------------------------|------|--------|-----------|--------|-----|----------|---|-------|----------|----------|--------------------------------------------|--------------|--------------|----------|------------------|------------------|-------|-----|-----|------------------------------------------------------------------|----------|
| MTLLLEDGC(+57.02)C(+57.02)TRPR.C | Y    | 61.19  | 1720.8059 | 14     | 1.0 | 574.6074 | 3 | 33.87 | 2        | F2:90467 | 20210611-09_2021021-OK160A_816_5.3.236.mgf |              | 0            | 0        | 0                | 0                | 1     | 14  |     | C9:Carbamidomethylation:1000.00;C10:Carbamidomethylation:1000.00 | PEAKS DB |
| total 1 peptides                 |      |        |           |        |     |          |   |       |          |          |                                            |              |              |          |                  |                  |       |     |     |                                                                  |          |

OK214\_J\_095\_M

back to list

| [Protein Coverage](#) | [Supporting Peptides](#) |

Protein Coverage:

1 [MTLLLEDGCC TRPR](#)FTGACS CCQD

Supporting Peptides:

| Peptide                          | Uniq | -10lgP | Mass      | Length | ppm | m/z      | z | RT    | Fraction | Scan     | Source File                                | Area ebraeus | Area judaeus | #Feature | #Feature ebraeus | #Feature judaeus | Start | End | PTM | AScore                                                           | Found By |
|----------------------------------|------|--------|-----------|--------|-----|----------|---|-------|----------|----------|--------------------------------------------|--------------|--------------|----------|------------------|------------------|-------|-----|-----|------------------------------------------------------------------|----------|
| MTLLLEDGC(+57.02)C(+57.02)TRPR.F | Y    | 61.19  | 1720.8059 | 14     | 1.0 | 574.6074 | 3 | 33.87 | 2        | F2:90467 | 20210611-09_2021021-OK160A_816_5.3.236.mgf |              | 0            | 0        | 0                | 0                | 1     | 14  |     | C9:Carbamidomethylation:1000.00;C10:Carbamidomethylation:1000.00 | PEAKS DB |
| total 1 peptides                 |      |        |           |        |     |          |   |       |          |          |                                            |              |              |          |                  |                  |       |     |     |                                                                  |          |

DAC80618\_TPA\_inf\_conodipine\_partial\_Conus\_magus

back to list

| [Protein Coverage](#) | [Supporting Peptides](#) |

Protein Coverage:

1 QDPSTAE LCK INSNACSVPF SWIPCQK[HFL AACDR](#)HDTCY HCGKHFGFKQ DDCDDAFFRD MTALCAHGTD DEGSCPEKRR

81 RREASSMSIT TPLRQLRQLE KLVLPNSLSA RDPRLHSRA ATCTHWALIY FKTVQLFGWW HFNQVQDATY CPQFQPCMPQ

161 V

Supporting Peptides:

| Peptide              | Uniq | -10lgP | Mass     | Length | ppm | m/z      | z | RT    | Fraction | Scan    | Source File                                | Area ebraeus | Area judaeus | #Feature | #Feature ebraeus | #Feature judaeus | Start | End | PTM | AScore                          | Found By |
|----------------------|------|--------|----------|--------|-----|----------|---|-------|----------|---------|--------------------------------------------|--------------|--------------|----------|------------------|------------------|-------|-----|-----|---------------------------------|----------|
| K.HFLAAC(+57.02)DR.H | Y    | 60.77  | 988.4548 | 8      | 2.3 | 495.2339 | 2 | 17.12 | 1        | F1:8423 | 20210611-08_2021021-OK192A_815_5.3.236.mgf | 0            |              | 0        | 0                | 0                | 28    | 35  |     | C6:Carbamidomethylation:1000.00 | PEAKS DB |
| total 1 peptides     |      |        |          |        |     |          |   |       |          |         |                                            |              |              |          |                  |                  |       |     |     |                                 |          |

OK212\_J\_293\_Conodipine

back to list

| [Protein Coverage](#) | [Supporting Peptides](#) |

Protein Coverage:

1 MKMLESALWI LAALALPWIV AQDSSTAELC KINSNGCSVP SALIQCRK[HF LAACDR](#)HDNC YFCGAHFGLT QSDCDNAFLT

81 HMTALCAQGT DDEGFCLERR KRRDASSMFI TSTPLRQLRL LEKLMPPNSL LDRHPRRRRF VTCTEWAEEY YRAVRLAGR W

161 YFYETADATY CPWFKPCVP

Supporting Peptides:

| Peptide              | Uniq | -10lgP | Mass     | Length | ppm | m/z      | z | RT    | Fraction | Scan    | Source File                                | Area ebraeus | Area judaeus | #Feature | #Feature ebraeus | #Feature judaeus | Start | End | PTM | AScore                          | Found By |
|----------------------|------|--------|----------|--------|-----|----------|---|-------|----------|---------|--------------------------------------------|--------------|--------------|----------|------------------|------------------|-------|-----|-----|---------------------------------|----------|
| K.HFLAAC(+57.02)DR.H | Y    | 60.77  | 988.4548 | 8      | 2.3 | 495.2339 | 2 | 17.12 | 1        | F1:8423 | 20210611-08_2021021-OK192A_815_5.3.236.mgf | 0            |              | 0        | 0                | 0                | 49    | 56  |     | C6:Carbamidomethylation:1000.00 | PEAKS DB |
| total 1 peptides     |      |        |          |        |     |          |   |       |          |         |                                            |              |              |          |                  |                  |       |     |     |                                 |          |

OK212\_J\_292\_Conodipine

back to list

| [Protein Coverage](#) | [Supporting Peptides](#) |

Protein Coverage:

1 MKMLESALWI LAALALPWIV AQDSSTAELC KINSNNCSVP FEWIPCQK[HF LAACDR](#)HDNC YFCGAHFGLT QSDCDNAFLT

81 HMTALCAQGT DDEGFCLERR KRRDASSMFI TSTPLRQLRL LEKLMPPNSL LDRHPRRRRF VTCTEWAEEY YRAVRLAGR W

161 YFYETADATY CPWFKPCVP

Supporting Peptides:

| Peptide              | Uniq | -10lgP | Mass     | Length | ppm | m/z      | z | RT    | Fraction | Scan    | Source File                                | Area ebraeus | Area judaeus | #Feature | #Feature ebraeus | #Feature judaeus | Start | End | PTM | AScore                          | Found By |
|----------------------|------|--------|----------|--------|-----|----------|---|-------|----------|---------|--------------------------------------------|--------------|--------------|----------|------------------|------------------|-------|-----|-----|---------------------------------|----------|
| K.HFLAAC(+57.02)DR.H | Y    | 60.77  | 988.4548 | 8      | 2.3 | 495.2339 | 2 | 17.12 | 1        | F1:8423 | 20210611-08_2021021-OK192A_815_5.3.236.mgf | 0            |              | 0        | 0                | 0                | 49    | 56  |     | C6:Carbamidomethylation:1000.00 | PEAKS DB |
| total 1 peptides     |      |        |          |        |     |          |   |       |          |         |                                            |              |              |          |                  |                  |       |     |     |                                 |          |

V\_CG13\_220\_Conodipine-2

back to list

| [Protein Coverage](#) | [Supporting Peptides](#) |

Protein Coverage:

1 NSNGCSVPVS FIPCQK[HFLA ACDR](#)HDTCYF CGAHFGFTQD DCDNAFLTDM AVLCADGTDD EGFCLEKRRK REASSMSITT

81 PLRQLRLEK LMP LNSLSDR DPRQP HRRIG TCTTWSEYFF QGVQTMGSWY FYKTANATHC PKFKACMPVV

Supporting Peptides:

| Peptide              | Uniq | -10lgP | Mass     | Length | ppm | m/z      | z | RT    | Fraction | Scan    | Source File                                | Area ebraeus | Area judaeus | #Feature | #Feature ebraeus | #Feature judaeus | Start | End | PTM | AScore                          | Found By |
|----------------------|------|--------|----------|--------|-----|----------|---|-------|----------|---------|--------------------------------------------|--------------|--------------|----------|------------------|------------------|-------|-----|-----|---------------------------------|----------|
| K.HFLAAC(+57.02)DR.H | Y    | 60.77  | 988.4548 | 8      | 2.3 | 495.2339 | 2 | 17.12 | 1        | F1:8423 | 20210611-08_2021021-OK192A_815_5.3.236.mgf | 0            |              | 0        | 0                | 0                | 17    | 24  |     | C6:Carbamidomethylation:1000.00 | PEAKS DB |
| total 1 peptides     |      |        |          |        |     |          |   |       |          |         |                                            |              |              |          |                  |                  |       |     |     |                                 |          |

V\_1258\_222\_Conodipine-2

back to list

| [Protein Coverage](#) | [Supporting Peptides](#) |

Protein Coverage:

### Supporting Peptides:

### V\_1302\_262\_Conodipine-2

[back to list](#)

| Protein Coverage | Supporting Peptides |

### Protein Coverage:

### Supporting Peptides:

V 1302 263 Conodipine-2[back to list](#)

| Protein Coverage | Supporting Peptides |

**Protein Coverage:**

### Supporting Peptides:

## CV8\_259\_Conodipine

[back to list](#)

| Protein Coverage | Supporting Peptides |

**Protein Coverage:**

1 MKVLESALWI LAALALWIA AQDISTAELC KINSNGCSVP VSWIPQKH **LAACDR**HDTFC YFCGAHGFET QDDCDNAFLT  
81 DMAALCAHGT DDKGFCLEKR KRREASSMSI TTPLRQLRLI EKIMPLNLS DRDPQPHRR AAATCTEWAE TYFEGVQNFA  
161 SSHFNYSASA TYCPOFEACM PVV

### Supporting Peptides:

## OK212\_J\_290\_Conodipine

[back to list](#)

| Protein Coverage | Supporting Peptides |

### Protein Coverage:

1 MKMLESALWI LAALALWIV AQDSSTAELC KINSNGCSVP SALIQCRKHF LAACDRHDNC YFCGAHFGLT QSDCDNAFLT  
81 HMTALCAQGT DDEGFCLERR KRRDASSMFI TSTPLRQLRL LEKLMPPNSL LDHDSRQPQQ RFFTCTKWAK KYFDAVRTSG  
161 SSYFSDTANA TYCPOFVDCM POV

### Supporting Peptides:

## OK212\_J\_291\_Conodipine

[back to list](#)

| Protein Coverage | Supporting Peptides |

**Protein Coverage:**

1 MKMLESALWI LAALALWIV AQDSSTAELC KINSNNCSVP FEWIPQKH **LAACDR**HDNC YFCGAHFGLT QSDCDNAFLT  
81 HMTALCAQGT DDEGFCLERR KRRDASSMFI TSTPLRQLRL LEKLMPPNSL LDHDSRQPQQ RFFTCTKWAQ KYFDAVRTSG  
161 SSYFSDTANA TYCPOFVDCM POV

### Supporting Peptides:

gene:107302264

[back to list](#)

| Protein Coverage | Supporting Peptides |

### Protein Coverage:

1 SLVPIPEKFQH ILRVLNINID GRERKIAFAIT AIKGVGRRYA HVVLRKADID LTKRAGELTE DEVERVITIM QNPRQYKIPD  
81 WFLNRKQDVK DGKYSO

### Supporting Peptides:

[illegible]

[back to list](#)

### Protein Coverage:

81 DWFLNRQKDV KDGKYSQVLA NGLDNKLRED LERLKKIRAH RGLRHFWGLR VRGQHTKTTG RRGRTVGVSK KK

[illegible][back to list](#)

### Protein Coverage:

1 DQPVERYAEN KQDLNPDERR EIILPALR

[illegible][back to list](#)

### Protein Coverage:

1 DQPVERYAEN KQDLNPDERR EIILPALRQ

[illegible][back to list](#)

### Protein Coverage:

1 DQPVERYAEN KQDLNPDERG

| Peptide          | Uniq | -10lgP | Mass     | Length | ppm | m/z      | z | RT    | Fraction | Scan    | Source File                                | Area ebraeus | Area judaeus | #Feature | #Feature ebraeus | #Feature judaeus | Start | End | PTM | AScore | Found By |
|------------------|------|--------|----------|--------|-----|----------|---|-------|----------|---------|--------------------------------------------|--------------|--------------|----------|------------------|------------------|-------|-----|-----|--------|----------|
| K,QDLNPDG.G      | Y    | 60.04  | 985.4465 | 8      | 4.4 | 493.7308 | 2 | 15.11 | 1        | F1:6285 | 20210611-08_2021021-OK192A_815_5.3.236.mgf | 0            |              | 0        | 0                | 0                | 12    | 19  |     |        | PEAKS DB |
| total 1 peptides |      |        |          |        |     |          |   |       |          |         |                                            |              |              |          |                  |                  |       |     |     |        |          |

[back to list](#)

### Protein Coverage:

1 DQPVRYAEN KQDLNPDERR E

[illegible][back to list](#)

### Protein Coverage:

1 QLNADQHVKR YAENKQDLNP DERKG

[illegible][back to list](#)

### Protein Coverage:

1 DQPVERYAEN KQDLNPDERR GCILPAL

[illegible][back to list](#)

### Protein Coverage:

1 DQPIERYAEN KQDLNPDERL EFILHALGQR

[illegible]

| [Protein Coverage](#) | [Supporting Peptides](#) |

Protein Coverage:

1 DQPVERYAEN K**QDLNPDER**M EFILHALGQR R

Supporting Peptides:

| Peptide          | Uniq | -10lgP | Mass     | Length | ppm | m/z      | z | RT    | Fraction | Scan    | Source File                                | Area ebraeus | Area judaeus | #Feature | #Feature ebraeus | #Feature judaeus | Start | End | PTM | AScore | Found By |
|------------------|------|--------|----------|--------|-----|----------|---|-------|----------|---------|--------------------------------------------|--------------|--------------|----------|------------------|------------------|-------|-----|-----|--------|----------|
| K.QDLNPDER.M     | Y    | 60.04  | 985.4465 | 8      | 4.4 | 493.7308 | 2 | 15.11 | 1        | F1:6285 | 20210611-08_2021021-OK192A_815_5.3.236.mgf | 0            |              | 0        | 0                | 0                | 12    | 19  |     |        | PEAKS DB |
| total 1 peptides |      |        |          |        |     |          |   |       |          |         |                                            |              |              |          |                  |                  |       |     |     |        |          |

| [Protein Coverage](#) | [Supporting Peptides](#) |

Protein Coverage:

1 QLDADQTV~~ER~~ YAENK**QDLNP DER**LLEFILHA LGQR

Supporting Peptides:

| Peptide          | Uniq | -10lgP | Mass     | Length | ppm | m/z      | z | RT    | Fraction | Scan    | Source File                                | Area ebraeus | Area judaeus | #Feature | #Feature ebraeus | #Feature judaeus | Start | End | PTM | AScore | Found By |
|------------------|------|--------|----------|--------|-----|----------|---|-------|----------|---------|--------------------------------------------|--------------|--------------|----------|------------------|------------------|-------|-----|-----|--------|----------|
| K.QDLNPDER.L     | Y    | 60.04  | 985.4465 | 8      | 4.4 | 493.7308 | 2 | 15.11 | 1        | F1:6285 | 20210611-08_2021021-OK192A_815_5.3.236.mgf | 0            |              | 0        | 0                | 0                | 16    | 23  |     |        | PEAKS DB |
| total 1 peptides |      |        |          |        |     |          |   |       |          |         |                                            |              |              |          |                  |                  |       |     |     |        |          |

| [Protein Coverage](#) | [Supporting Peptides](#) |

Protein Coverage:

1 DADQPVERHA ENK**QDLNPDE R**REIILPGLR HGRPSRSY~~GW~~ RTG

Supporting Peptides:

| Peptide          | Uniq | -10lgP | Mass     | Length | ppm | m/z      | z | RT    | Fraction | Scan    | Source File                                | Area ebraeus | Area judaeus | #Feature | #Feature ebraeus | #Feature judaeus | Start | End | PTM | AScore | Found By |
|------------------|------|--------|----------|--------|-----|----------|---|-------|----------|---------|--------------------------------------------|--------------|--------------|----------|------------------|------------------|-------|-----|-----|--------|----------|
| K.QDLNPDER.R     | Y    | 60.04  | 985.4465 | 8      | 4.4 | 493.7308 | 2 | 15.11 | 1        | F1:6285 | 20210611-08_2021021-OK192A_815_5.3.236.mgf | 0            |              | 0        | 0                | 0                | 14    | 21  |     |        | PEAKS DB |
| total 1 peptides |      |        |          |        |     |          |   |       |          |         |                                            |              |              |          |                  |                  |       |     |     |        |          |

| [Protein Coverage](#) | [Supporting Peptides](#) |

Protein Coverage:

1 QLDADQPVER HVENK**QDLNP DER**RQIKFDA LRHGRLSRSS GWRTG

Supporting Peptides:

| Peptide          | Uniq | -10lgP | Mass     | Length | ppm | m/z      | z | RT    | Fraction | Scan    | Source File                                | Area ebraeus | Area judaeus | #Feature | #Feature ebraeus | #Feature judaeus | Start | End | PTM | AScore | Found By |
|------------------|------|--------|----------|--------|-----|----------|---|-------|----------|---------|--------------------------------------------|--------------|--------------|----------|------------------|------------------|-------|-----|-----|--------|----------|
| K.QDLNPDER.R     | Y    | 60.04  | 985.4465 | 8      | 4.4 | 493.7308 | 2 | 15.11 | 1        | F1:6285 | 20210611-08_2021021-OK192A_815_5.3.236.mgf | 0            |              | 0        | 0                | 0                | 16    | 23  |     |        | PEAKS DB |
| total 1 peptides |      |        |          |        |     |          |   |       |          |         |                                            |              |              |          |                  |                  |       |     |     |        |          |

| [Protein Coverage](#) | [Supporting Peptides](#) |

Protein Coverage:

1 QLDADQPVER HVENK**QDLNP DER**RGILLHA LGHLMSSSPN GWWSR

Supporting Peptides:

| Peptide          | Uniq | -10lgP | Mass     | Length | ppm | m/z      | z | RT    | Fraction | Scan    | Source File                                | Area ebraeus | Area judaeus | #Feature | #Feature ebraeus | #Feature judaeus | Start | End | PTM | AScore | Found By |
|------------------|------|--------|----------|--------|-----|----------|---|-------|----------|---------|--------------------------------------------|--------------|--------------|----------|------------------|------------------|-------|-----|-----|--------|----------|
| K.QDLNPDER.R     | Y    | 60.04  | 985.4465 | 8      | 4.4 | 493.7308 | 2 | 15.11 | 1        | F1:6285 | 20210611-08_2021021-OK192A_815_5.3.236.mgf | 0            |              | 0        | 0                | 0                | 16    | 23  |     |        | PEAKS DB |
| total 1 peptides |      |        |          |        |     |          |   |       |          |         |                                            |              |              |          |                  |                  |       |     |     |        |          |

| [Protein Coverage](#) | [Supporting Peptides](#) |

Protein Coverage:

1 MAKVTFKVT~~L~~ TSDPRLPYKV LSVPEKTPFT AVLK**FAAEF K**VPAATS~~AI~~ TNDGIGINPD QTAGNVFLKY GSELRLIPRD

81 RVGRYWHMQG PLILREQK

Supporting Peptides:

| Peptide          | Uniq | -10lgP | Mass     | Length | ppm | m/z      | z | RT    | Fraction | Scan     | Source File                                | Area ebraeus | Area judaeus | #Feature | #Feature ebraeus | #Feature judaeus | Start | End | PTM | AScore | Found By |
|------------------|------|--------|----------|--------|-----|----------|---|-------|----------|----------|--------------------------------------------|--------------|--------------|----------|------------------|------------------|-------|-----|-----|--------|----------|
| K.FAAEFK.V       | Y    | 59.84  | 840.4017 | 7      | 4.4 | 421.2082 | 2 | 24.99 | 2        | F2:74748 | 20210611-09_2021021-OK160A_816_5.3.236.mgf | 0            | 0            | 0        | 0                | 0                | 35    | 41  |     |        | PEAKS DB |
| total 1 peptides |      |        |          |        |     |          |   |       |          |          |                                            |              |              |          |                  |                  |       |     |     |        |          |

| [Protein Coverage](#) | [Supporting Peptides](#) |

Protein Coverage:

1 MAAPGGWSSV LWLLLAAGI APRAWGLYFH LGETERKCFI EEIPDETMVI GNYRTQLYDK QREEYLPATP GLGMFVEVKD

81 PDEKVVLSRQ YGSEGRFIFT SHTPGEHQIC LHSNSTKFSL FAGGMLRVHL DIQVGEHAND YAEIAAK**DKL SELQLR**VRQL

161 LEQIEQIQKE QNYQRWREER FRQTSESTNQ RVLWWSIVQT LILVIGVWQ MRHLKSFFEA KKL~~V~~

Supporting Peptides:

| Peptide                   | Uniq | -10lgP | Mass      | Length | ppm | m/z      | z | RT    | Fraction | Scan     | Source File                                | Area ebraeus | Area judaeus | #Feature | #Feature ebraeus | #Feature judaeus | Start | End | PTM | AScore | Found By |
|---------------------------|------|--------|-----------|--------|-----|----------|---|-------|----------|----------|--------------------------------------------|--------------|--------------|----------|------------------|------------------|-------|-----|-----|--------|----------|
| K.DKLS <del>ELQ</del> R.V | Y    | 58.82  | 1100.6189 | 9      | 5.4 | 551.3174 | 2 | 28.68 | 2        | F2:81416 | 20210611-09_2021021-OK160A_816_5.3.236.mgf |              | 0            | 0        | 0                | 0                | 148   | 156 |     |        | PEAKS DB |
| total 1 peptides          |      |        |           |        |     |          |   |       |          |          |                                            |              |              |          |                  |                  |       |     |     |        |          |

| [Protein Coverage](#) | [Supporting Peptides](#) |

Protein Coverage:

1 DGVKSPR**EKI NFLSK**RK~~TNA~~ ESWWE

Supporting Peptides:

| Peptide | Uniq | -10lgP | Mass | Length | ppm | m/z | z | RT | Fraction | Scan | Source File | Area ebraeus | Area judaeus | #Feature | #Feature ebraeus | #Feature judaeus | Start | End | PTM | AScore | Found By |
|---------|------|--------|------|--------|-----|-----|---|----|----------|------|-------------|--------------|--------------|----------|------------------|------------------|-------|-----|-----|--------|----------|
|---------|------|--------|------|--------|-----|-----|---|----|----------|------|-------------|--------------|--------------|----------|------------------|------------------|-------|-----|-----|--------|----------|

| Peptide          | Uniq | -10lgP | Mass     | Length | ppm | m/z      | z | RT    | Fraction | Scan     | Source File                                | Area ebraeus | Area judaeus | #Feature | #Feature ebraeus | #Feature judaeus | Start | End | PTM | AScore | Found By |
|------------------|------|--------|----------|--------|-----|----------|---|-------|----------|----------|--------------------------------------------|--------------|--------------|----------|------------------|------------------|-------|-----|-----|--------|----------|
| R.EKINFLSK.R     | Y    | 58.28  | 977.5546 | 8      | 1.7 | 489.7833 | 2 | 25.75 | 2        | F2:75858 | 20210611-09_2021021-OK160A_816_5.3.236.mgf |              | 0            | 0        | 0                | 0                | 8     | 15  |     |        | PEAKS DB |
| total 1 peptides |      |        |          |        |     |          |   |       |          |          |                                            |              |              |          |                  |                  |       |     |     |        |          |

OK214\_J\_169\_O2

back to list

| [Protein Coverage](#) | [Supporting Peptides](#) |

Protein Coverage:

1 LNQGGEVKSP REKINFLSKR ESAAESRWEG EC

Supporting Peptides:

| Peptide          | Uniq | -10lgP | Mass     | Length | ppm | m/z      | z | RT    | Fraction | Scan     | Source File                                | Area ebraeus | Area judaeus | #Feature | #Feature ebraeus | #Feature judaeus | Start | End | PTM | AScore | Found By |
|------------------|------|--------|----------|--------|-----|----------|---|-------|----------|----------|--------------------------------------------|--------------|--------------|----------|------------------|------------------|-------|-----|-----|--------|----------|
| R.EKINFLSK.R     | Y    | 58.28  | 977.5546 | 8      | 1.7 | 489.7833 | 2 | 25.75 | 2        | F2:75858 | 20210611-09_2021021-OK160A_816_5.3.236.mgf |              | 0            | 0        | 0                | 0                | 12    | 19  |     |        | PEAKS DB |
| total 1 peptides |      |        |          |        |     |          |   |       |          |          |                                            |              |              |          |                  |                  |       |     |     |        |          |

OK006\_E\_230\_Ggeo01

back to list

| [Protein Coverage](#) | [Supporting Peptides](#) |

Protein Coverage:

1 SQTDDSSTEK RSRSMPDVDF NLQFDKIGDS SDFGKGGFPKR K

Supporting Peptides:

| Peptide          | Uniq | -10lgP | Mass     | Length | ppm | m/z      | z | RT    | Fraction | Scan    | Source File                                | Area ebraeus | Area judaeus | #Feature | #Feature ebraeus | #Feature judaeus | Start | End | PTM | AScore | Found By |
|------------------|------|--------|----------|--------|-----|----------|---|-------|----------|---------|--------------------------------------------|--------------|--------------|----------|------------------|------------------|-------|-----|-----|--------|----------|
| K.IGDSSDFGK.G    | Y    | 58.10  | 924.4188 | 9      | 2.7 | 463.2162 | 2 | 18.36 | 1        | F1:9680 | 20210611-08_2021021-OK192A_815_5.3.236.mgf | 0            |              | 0        | 0                | 0                | 27    | 35  |     |        | PEAKS DB |
| total 1 peptides |      |        |          |        |     |          |   |       |          |         |                                            |              |              |          |                  |                  |       |     |     |        |          |

P08581

back to list

| [Protein Coverage](#) | [Supporting Peptides](#) |

Protein Coverage:

1 EPMQGMEAEG HFVR<sup>3</sup><sub>0</sub>TDCDEG CMKCGSGCCC SPNSCIDSQC RGQVFPQ ■ Oxidation (M) (+15.99)

Supporting Peptides:

| Peptide                          | Uniq | -10lgP | Mass      | Length | ppm | m/z      | z | RT    | Fraction | Scan     | Source File                                | Area ebraeus | Area judaeus | #Feature | #Feature ebraeus | #Feature judaeus | Start | End | PTM           | AScore                                            | Found By |
|----------------------------------|------|--------|-----------|--------|-----|----------|---|-------|----------|----------|--------------------------------------------|--------------|--------------|----------|------------------|------------------|-------|-----|---------------|---------------------------------------------------|----------|
| EPM(+15.99)QGM(+15.99)EAEGHFVR.T | Y    | 58.09  | 1648.6974 | 14     | 2.9 | 550.5726 | 3 | 19.29 | 1        | F1:10592 | 20210611-08_2021021-OK192A_815_5.3.236.mgf | 0            |              | 0        | 0                | 0                | 1     | 14  | Oxidation (M) | M3:Oxidation (M):1000.00;M6:Oxidation (M):1000.00 | PEAKS DB |
| total 1 peptides                 |      |        |           |        |     |          |   |       |          |          |                                            |              |              |          |                  |                  |       |     |               |                                                   |          |

OK193\_E\_233\_Sf-mi2

back to list

| [Protein Coverage](#) | [Supporting Peptides](#) |

Protein Coverage:

1 EPMQGMEAEG HFVR<sup>3</sup><sub>0</sub>TDCEDD CGTCGSGCCC APDSCIDSRC RSHVGN ■ Oxidation (M) (+15.99)

Supporting Peptides:

| Peptide                          | Uniq | -10lgP | Mass      | Length | ppm | m/z      | z | RT    | Fraction | Scan     | Source File                                | Area ebraeus | Area judaeus | #Feature | #Feature ebraeus | #Feature judaeus | Start | End | PTM           | AScore                                            | Found By |
|----------------------------------|------|--------|-----------|--------|-----|----------|---|-------|----------|----------|--------------------------------------------|--------------|--------------|----------|------------------|------------------|-------|-----|---------------|---------------------------------------------------|----------|
| EPM(+15.99)QGM(+15.99)EAEGHFVR.T | Y    | 58.09  | 1648.6974 | 14     | 2.9 | 550.5726 | 3 | 19.29 | 1        | F1:10592 | 20210611-08_2021021-OK192A_815_5.3.236.mgf | 0            |              | 0        | 0                | 0                | 1     | 14  | Oxidation (M) | M3:Oxidation (M):1000.00;M6:Oxidation (M):1000.00 | PEAKS DB |
| total 1 peptides                 |      |        |           |        |     |          |   |       |          |          |                                            |              |              |          |                  |                  |       |     |               |                                                   |          |

gene:107292229

back to list

| [Protein Coverage](#) | [Supporting Peptides](#) |

Protein Coverage:

1 MSTAPAGPEY SSFFAVMGAS AAMIFSALGA AYGTAKSGTG IAAMSVMRPE LIMKSIIPVV MAGIITAIYGL VVAVLIASSL

81 VHDISLFKSF LQLGAGLSVG LSGLAAGFAI GIVGDAGVRG TAQQPRLFVG MILILIFAEV LGLYGLIVGL ILSTKG

Supporting Peptides:

| Peptide                                        | Uniq | -10lgP | Mass      | Length | ppm | m/z      | z | RT    | Fraction | Scan     | Source File                                | Area ebraeus | Area judaeus | #Feature | #Feature ebraeus | #Feature judaeus | Start | End | PTM | AScore                                                                            | Found By |
|------------------------------------------------|------|--------|-----------|--------|-----|----------|---|-------|----------|----------|--------------------------------------------|--------------|--------------|----------|------------------|------------------|-------|-----|-----|-----------------------------------------------------------------------------------|----------|
| K.SGTGIAAM(+15.99)SVM(+15.99)RPELIM(+15.99)K.S | Y    | 58.05  | 1938.9576 | 18     | 2.2 | 970.4841 | 2 | 30.89 | 2        | F2:84821 | 20210611-09_2021021-OK160A_816_5.3.236.mgf |              | 0            | 0        | 0                | 0                | 37    | 54  |     | M8:Oxidation (M):10 00.00; M11:Oxidation (M):10 00.00; M17:Oxidation (M):10 00.00 | PEAKS DB |
| total 1 peptides                               |      |        |           |        |     |          |   |       |          |          |                                            |              |              |          |                  |                  |       |     |     |                                                                                   |          |

OK214\_J\_009\_B2

back to list

| [Protein Coverage](#) | [Supporting Peptides](#) |

Protein Coverage:

1 APANVDPNLQ PFGGALTIPN MQPMQGMTGM PSPQFLPFP NFAVGLKREN LEKRRHNPQF SDNNQSPFGS EGDLSFMNF

81 MKENGNNLPF ADVN

Supporting Peptides:

| Peptide          | Uniq | -10lgP | Mass      | Length | ppm  | m/z      | z | RT    | Fraction | Scan     | Source File                                | Area ebraeus | Area judaeus | #Feature | #Feature ebraeus | #Feature judaeus | Start | End | PTM | AScore | Found By |
|------------------|------|--------|-----------|--------|------|----------|---|-------|----------|----------|--------------------------------------------|--------------|--------------|----------|------------------|------------------|-------|-----|-----|--------|----------|
| K.ENGNNLPFADVN   | Y    | 58.02  | 1302.5840 | 12     | -0.7 | 652.2963 | 2 | 40.79 | 1        | F1:38394 | 20210611-08_2021021-OK192A_815_5.3.236.mgf | 0            |              | 0        | 0                | 0                | 83    | 94  |     |        | PEAKS DB |
| total 1 peptides |      |        |           |        |      |          |   |       |          |          |                                            |              |              |          |                  |                  |       |     |     |        |          |

OK214\_J\_276\_Rimp01

back to list

| [Protein Coverage](#) | [Supporting Peptides](#) |

Protein Coverage:

1 AGIQYSAESP MQQCSTHAVS <sup>22</sup>KMEVYSNNQG KYELLDSYCS CDSGEAYFEA QDTTSSSTV SSYKI ■ Oxidation (M) (+15.99)



Supporting Peptides:

| Peptide                | Uniq | -10lgP | Mass      | Length | ppm | m/z      | z | RT    | Fraction | Scan    | Source File                                | Area ebraeus | Area judaeus | #Feature | #Feature ebraeus | #Feature judaeus | Start | End | PTM           | AScore                   | Found By |
|------------------------|------|--------|-----------|--------|-----|----------|---|-------|----------|---------|--------------------------------------------|--------------|--------------|----------|------------------|------------------|-------|-----|---------------|--------------------------|----------|
| K.M(+15.99)EVYSNNQGK.Y | Y    | 57.67  | 1184.5132 | 10     | 1.4 | 593.2625 | 2 | 11.79 | 1        | F1:2928 | 20210611-08_2021021-OK192A_815_5.3.236.mgf | 0            |              | 0        | 0                | 0                | 22    | 31  | Oxidation (M) | M1:Oxidation (M):1000.00 | PEAKS DB |
| total 1 peptides       |      |        |           |        |     |          |   |       |          |         |                                            |              |              |          |                  |                  |       |     |               |                          |          |

OK006\_E\_239\_Rimp01

[back to list](#)

| [Protein Coverage](#) | [Supporting Peptides](#) |

Protein Coverage:

|    |                                                         |                                                       |                                                                                                            |
|----|---------------------------------------------------------|-------------------------------------------------------|------------------------------------------------------------------------------------------------------------|
| 1  | AGIQYSAESP MQQCSTHAVS <sup>22</sup> <u>KMEVYSNNQG</u> K | YELLD SYCS CDSGEAYFEA QDTTSSSTV SSYKIYVCGM PTESCTGGTL |  Oxidation (M) (+15.99) |
| 81 | PVTDSDNGPR RMQCTCGQYK YLVSASLGWH VRC                    |                                                       |                                                                                                            |

Supporting Peptides:

| Peptide                | Uniq | -10lgP | Mass      | Length | ppm | m/z      | z | RT    | Fraction | Scan    | Source File                                | Area ebraeus | Area judaeus | #Feature | #Feature ebraeus | #Feature judaeus | Start | End | PTM           | AScore                   | Found By |
|------------------------|------|--------|-----------|--------|-----|----------|---|-------|----------|---------|--------------------------------------------|--------------|--------------|----------|------------------|------------------|-------|-----|---------------|--------------------------|----------|
| K.M(+15.99)EVYSNNQGK.Y | Y    | 57.67  | 1184.5132 | 10     | 1.4 | 593.2625 | 2 | 11.79 | 1        | F1:2928 | 20210611-08_2021021-OK192A_815_5.3.236.mgf | 0            |              | 0        | 0                | 0                | 22    | 31  | Oxidation (M) | M1:Oxidation (M):1000.00 | PEAKS DB |
| total 1 peptides       |      |        |           |        |     |          |   |       |          |         |                                            |              |              |          |                  |                  |       |     |               |                          |          |

OK213\_E\_266\_Rimp01

[back to list](#)

| [Protein Coverage](#) | [Supporting Peptides](#) |

Protein Coverage:

|    |                                                         |                                                       |                                                                                                            |
|----|---------------------------------------------------------|-------------------------------------------------------|------------------------------------------------------------------------------------------------------------|
| 1  | AGIQYSAESP MQQCSTHAVS <sup>22</sup> <u>KMEVYSNNQG</u> K | YELLD SYCS CDSGEAYFEA QDTTSSSTV SSYKIYVCGM PTESCTGGTL |  Oxidation (M) (+15.99) |
| 81 | PVTDSDNGPR RMQCTCGQYK YFISASLGWH VRC                    |                                                       |                                                                                                            |

Supporting Peptides:

| Peptide                | Uniq | -10lgP | Mass      | Length | ppm | m/z      | z | RT    | Fraction | Scan    | Source File                                | Area ebraeus | Area judaeus | #Feature | #Feature ebraeus | #Feature judaeus | Start | End | PTM           | AScore                   | Found By |
|------------------------|------|--------|-----------|--------|-----|----------|---|-------|----------|---------|--------------------------------------------|--------------|--------------|----------|------------------|------------------|-------|-----|---------------|--------------------------|----------|
| K.M(+15.99)EVYSNNQGK.Y | Y    | 57.67  | 1184.5132 | 10     | 1.4 | 593.2625 | 2 | 11.79 | 1        | F1:2928 | 20210611-08_2021021-OK192A_815_5.3.236.mgf | 0            |              | 0        | 0                | 0                | 22    | 31  | Oxidation (M) | M1:Oxidation (M):1000.00 | PEAKS DB |
| total 1 peptides       |      |        |           |        |     |          |   |       |          |         |                                            |              |              |          |                  |                  |       |     |               |                          |          |

CebrOK016\_E\_135\_Rimp

[back to list](#)

| [Protein Coverage](#) | [Supporting Peptides](#) |

Protein Coverage:

|    |                                                         |                                                       |                                                                                                            |
|----|---------------------------------------------------------|-------------------------------------------------------|------------------------------------------------------------------------------------------------------------|
| 1  | AGIQYSAESP MQQCSTHAVS <sup>22</sup> <u>KMEVYSNNQG</u> K | YELLD SYCS CDSGEAYFEA QDTTSSSTV SSYKIYVCGM PTESCTGGTL |  Oxidation (M) (+15.99) |
| 81 | PVTDSDNGPR RMQCTCGQYK YLVSASLGWH VRC                    |                                                       |                                                                                                            |

Supporting Peptides:

| Peptide                | Uniq | -10lgP | Mass      | Length | ppm | m/z      | z | RT    | Fraction | Scan    | Source File                                | Area ebraeus | Area judaeus | #Feature | #Feature ebraeus | #Feature judaeus | Start | End | PTM           | AScore                   | Found By |
|------------------------|------|--------|-----------|--------|-----|----------|---|-------|----------|---------|--------------------------------------------|--------------|--------------|----------|------------------|------------------|-------|-----|---------------|--------------------------|----------|
| K.M(+15.99)EVYSNNQGK.Y | Y    | 57.67  | 1184.5132 | 10     | 1.4 | 593.2625 | 2 | 11.79 | 1        | F1:2928 | 20210611-08_2021021-OK192A_815_5.3.236.mgf | 0            |              | 0        | 0                | 0                | 22    | 31  | Oxidation (M) | M1:Oxidation (M):1000.00 | PEAKS DB |
| total 1 peptides       |      |        |           |        |     |          |   |       |          |         |                                            |              |              |          |                  |                  |       |     |               |                          |          |

OK193\_E\_223\_Rimp01

[back to list](#)

| [Protein Coverage](#) | [Supporting Peptides](#) |

Protein Coverage:

|    |                                                         |                                                       |                                                                                                              |
|----|---------------------------------------------------------|-------------------------------------------------------|--------------------------------------------------------------------------------------------------------------|
| 1  | AGIQYSAESP MQQCSTHAVS <sup>22</sup> <u>KMEVYSNNQG</u> K | YELLD SYCS CDSGEAYFDA QDTTSSSTV SSYKIYVCGM PTESCTGGTL |  Oxidation (M) (+15.99) |
| 81 | PVTDSDNGPR RMQCTCGQYK YLVSASLGWH VRC                    |                                                       |                                                                                                              |

Supporting Peptides:

| Peptide                | Uniq | -10lgP | Mass      | Length | ppm | m/z      | z | RT    | Fraction | Scan    | Source File                                | Area ebraeus | Area judaeus | #Feature | #Feature ebraeus | #Feature judaeus | Start | End | PTM           | AScore                   | Found By |
|------------------------|------|--------|-----------|--------|-----|----------|---|-------|----------|---------|--------------------------------------------|--------------|--------------|----------|------------------|------------------|-------|-----|---------------|--------------------------|----------|
| K.M(+15.99)EVYSNNQGK.Y | Y    | 57.67  | 1184.5132 | 10     | 1.4 | 593.2625 | 2 | 11.79 | 1        | F1:2928 | 20210611-08_2021021-OK192A_815_5.3.236.mgf | 0            |              | 0        | 0                | 0                | 22    | 31  | Oxidation (M) | M1:Oxidation (M):1000.00 | PEAKS DB |
| total 1 peptides       |      |        |           |        |     |          |   |       |          |         |                                            |              |              |          |                  |                  |       |     |               |                          |          |

SRX1323887\_E\_204\_Rimp01

[back to list](#)

| [Protein Coverage](#) | [Supporting Peptides](#) |

Protein Coverage:

|    |                                                         |                                                       |                                                                                                              |
|----|---------------------------------------------------------|-------------------------------------------------------|--------------------------------------------------------------------------------------------------------------|
| 1  | AGIQYSAESP MQQCSTHAVS <sup>22</sup> <u>KMEVYSNNQG</u> K | YELLD SYCS CDSGEAYFEA QDTTSSSTV SSYKIYVCGM PTESCTGGTL |  Oxidation (M) (+15.99) |
| 81 | PVTDSDNGPR RMQCTCGQYK YLVSASLGWH VRC                    |                                                       |                                                                                                              |

Supporting Peptides:

| Peptide                | Uniq | -10lgP | Mass      | Length | ppm | m/z      | z | RT    | Fraction | Scan    | Source File                                | Area ebraeus | Area judaeus | #Feature | #Feature ebraeus | #Feature judaeus | Start | End | PTM           | AScore                   | Found By |
|------------------------|------|--------|-----------|--------|-----|----------|---|-------|----------|---------|--------------------------------------------|--------------|--------------|----------|------------------|------------------|-------|-----|---------------|--------------------------|----------|
| K.M(+15.99)EVYSNNQGK.Y | Y    | 57.67  | 1184.5132 | 10     | 1.4 | 593.2625 | 2 | 11.79 | 1        | F1:2928 | 20210611-08_2021021-OK192A_815_5.3.236.mgf | 0            |              | 0        | 0                | 0                | 22    | 31  | Oxidation (M) | M1:Oxidation (M):1000.00 | PEAKS DB |
| total 1 peptides       |      |        |           |        |     |          |   |       |          |         |                                            |              |              |          |                  |                  |       |     |               |                          |          |

CebrOK014\_E\_124\_Rimp01

[back to list](#)

| [Protein Coverage](#) | [Supporting Peptides](#) |

Protein Coverage:

|    |                                                         |                                                       |                                                                                                              |
|----|---------------------------------------------------------|-------------------------------------------------------|--------------------------------------------------------------------------------------------------------------|
| 1  | AGIQYSAESP MQQCSTHAVS <sup>22</sup> <u>KMEVYSNNQG</u> K | YELLD SYCS CDSGEAYFEA QDTTSSSTV SSYKIYVCGM PTESCTGGTL |  Oxidation (M) (+15.99) |
| 81 | PVTDSDNGPR RMQCTCGQYK YLVSASLGWH VRC                    |                                                       |                                                                                                              |

Supporting Peptides:

| Peptide                | Uniq | -10lgP | Mass      | Length | ppm | m/z      | z | RT    | Fraction | Scan    | Source File                                | Area ebraeus | Area judaeus | #Feature | #Feature ebraeus | #Feature judaeus | Start | End | PTM           | AScore                   | Found By |
|------------------------|------|--------|-----------|--------|-----|----------|---|-------|----------|---------|--------------------------------------------|--------------|--------------|----------|------------------|------------------|-------|-----|---------------|--------------------------|----------|
| K.M(+15.99)EVYSNNQGK.Y | Y    | 57.67  | 1184.5132 | 10     | 1.4 | 593.2625 | 2 | 11.79 | 1        | F1:2928 | 20210611-08_2021021-OK192A_815_5.3.236.mgf | 0            |              | 0        | 0                | 0                | 22    | 31  | Oxidation (M) | M1:Oxidation (M):1000.00 | PEAKS DB |
| total 1 peptides       |      |        |           |        |     |          |   |       |          |         |                                            |              |              |          |                  |                  |       |     |               |                          |          |

OK213\_E\_267\_Rimp01

[back to list](#)

| [Protein Coverage](#) | [Supporting Peptides](#) |

Protein Coverage:

1 AGIQYPTVRP IGPCSTNAIS KTELYSNRYGY RYVLHYSYCS CASGEVYFEA QDTTTSYTTV LYKIYACGAP THSCSGETLP

81 V

Supporting Peptides:

| Peptide          | Uniq | -10lgP | Mass     | Length | ppm | m/z      | z | RT    | Fraction | Scan     | Source File                                | Area ebraeus | Area judaeus | #Feature | #Feature ebraeus | #Feature judaeus | Start | End | PTM | AScore | Found By |
|------------------|------|--------|----------|--------|-----|----------|---|-------|----------|----------|--------------------------------------------|--------------|--------------|----------|------------------|------------------|-------|-----|-----|--------|----------|
| K.TELYSNR.Y      | Y    | 57.66  | 881.4243 | 7      | 5.6 | 441.7200 | 2 | 15.77 | 2        | F2:59839 | 20210611-09_2021021-OK160A_816_5.3.236.mgf |              | 0            | 0        | 0                | 0                | 22    | 28  |     |        | PEAKS DB |
| total 1 peptides |      |        |          |        |     |          |   |       |          |          |                                            |              |              |          |                  |                  |       |     |     |        |          |

OK212\_J\_266\_Rimp01

[back to list](#)

| [Protein Coverage](#) | [Supporting Peptides](#) |

Protein Coverage:

1 IQYPTVRPIG PCSTNAISKT ELYSNRYGRY VLHYSYCSCA SGEVYFEAQD TTTSYTTVLY KIYACGAPTH SCSGETLPVT

81 DPDDRPRKMQ CTCEQYKYL YPRLGWLVR

Supporting Peptides:

| Peptide          | Uniq | -10lgP | Mass     | Length | ppm | m/z      | z | RT    | Fraction | Scan     | Source File                                | Area ebraeus | Area judaeus | #Feature | #Feature ebraeus | #Feature judaeus | Start | End | PTM | AScore | Found By |
|------------------|------|--------|----------|--------|-----|----------|---|-------|----------|----------|--------------------------------------------|--------------|--------------|----------|------------------|------------------|-------|-----|-----|--------|----------|
| K.TELYSNR.Y      | Y    | 57.66  | 881.4243 | 7      | 5.6 | 441.7200 | 2 | 15.77 | 2        | F2:59839 | 20210611-09_2021021-OK160A_816_5.3.236.mgf |              | 0            | 0        | 0                | 0                | 20    | 26  |     |        | PEAKS DB |
| total 1 peptides |      |        |          |        |     |          |   |       |          |          |                                            |              |              |          |                  |                  |       |     |     |        |          |

CebrOK035\_J\_314\_Rimp01

[back to list](#)

| [Protein Coverage](#) | [Supporting Peptides](#) |

Protein Coverage:

1 IQYPTVRPIG PCSTNAISKT ELYSNRYGRY VLHYSYCSCA SGEVYFEAQD TTTSYTTVLY KIYACGAPTH SCSGETLPVT

81 DPDDRPRKMQ CTCEQYKYL YPRLGWLVR

Supporting Peptides:

| Peptide          | Uniq | -10lgP | Mass     | Length | ppm | m/z      | z | RT    | Fraction | Scan     | Source File                                | Area ebraeus | Area judaeus | #Feature | #Feature ebraeus | #Feature judaeus | Start | End | PTM | AScore | Found By |
|------------------|------|--------|----------|--------|-----|----------|---|-------|----------|----------|--------------------------------------------|--------------|--------------|----------|------------------|------------------|-------|-----|-----|--------|----------|
| K.TELYSNR.Y      | Y    | 57.66  | 881.4243 | 7      | 5.6 | 441.7200 | 2 | 15.77 | 2        | F2:59839 | 20210611-09_2021021-OK160A_816_5.3.236.mgf |              | 0            | 0        | 0                | 0                | 20    | 26  |     |        | PEAKS DB |
| total 1 peptides |      |        |          |        |     |          |   |       |          |          |                                            |              |              |          |                  |                  |       |     |     |        |          |

OK005\_J\_279\_Rimp01

[back to list](#)

| [Protein Coverage](#) | [Supporting Peptides](#) |

Protein Coverage:

1 IQYPTVRPIG PCSTNAISKT ELYSNRYGRY VLHYSYCSCA SGEVYFEAQD TTTSYTTVLY KIYACGAPTH SCSGETLPVT

81 DPDDRPRKMQ CTCEQYKYL YPRLGWLVR

Supporting Peptides:

| Peptide          | Uniq | -10lgP | Mass     | Length | ppm | m/z      | z | RT    | Fraction | Scan     | Source File                                | Area ebraeus | Area judaeus | #Feature | #Feature ebraeus | #Feature judaeus | Start | End | PTM | AScore | Found By |
|------------------|------|--------|----------|--------|-----|----------|---|-------|----------|----------|--------------------------------------------|--------------|--------------|----------|------------------|------------------|-------|-----|-----|--------|----------|
| K.TELYSNR.Y      | Y    | 57.66  | 881.4243 | 7      | 5.6 | 441.7200 | 2 | 15.77 | 2        | F2:59839 | 20210611-09_2021021-OK160A_816_5.3.236.mgf |              | 0            | 0        | 0                | 0                | 20    | 26  |     |        | PEAKS DB |
| total 1 peptides |      |        |          |        |     |          |   |       |          |          |                                            |              |              |          |                  |                  |       |     |     |        |          |

OK214\_J\_274\_Rimp01

[back to list](#)

| [Protein Coverage](#) | [Supporting Peptides](#) |

Protein Coverage:

1 IQYPTVRPIG PCSTNAISKT ELYSNRYGRY VLHYSYCSCA SGEVYFEAQD TTSSSTVSS YKIYVCGMPT ESCTGGTLPV

81 TDSNGPRRM QCTCGQKYF VYSWGWVHVR

Supporting Peptides:

| Peptide          | Uniq | -10lgP | Mass     | Length | ppm | m/z      | z | RT    | Fraction | Scan     | Source File                                | Area ebraeus | Area judaeus | #Feature | #Feature ebraeus | #Feature judaeus | Start | End | PTM | AScore | Found By |
|------------------|------|--------|----------|--------|-----|----------|---|-------|----------|----------|--------------------------------------------|--------------|--------------|----------|------------------|------------------|-------|-----|-----|--------|----------|
| K.TELYSNR.Y      | Y    | 57.66  | 881.4243 | 7      | 5.6 | 441.7200 | 2 | 15.77 | 2        | F2:59839 | 20210611-09_2021021-OK160A_816_5.3.236.mgf |              | 0            | 0        | 0                | 0                | 20    | 26  |     |        | PEAKS DB |
| total 1 peptides |      |        |          |        |     |          |   |       |          |          |                                            |              |              |          |                  |                  |       |     |     |        |          |

OK214\_J\_273\_Rimp01

[back to list](#)

| [Protein Coverage](#) | [Supporting Peptides](#) |

Protein Coverage:

1 IQYPTVRPIG PCSTNAISKT ELYSNRYGRY VLHYSYCSCA SGEVYFEAQD TTTSYTTVLY KIYACGAPTH SCSGETLPVT

81 DPDDRPRKMQ CTCEQYKYL YPRLGWLVR

Supporting Peptides:

| Peptide          | Uniq | -10lgP | Mass     | Length | ppm | m/z      | z | RT    | Fraction | Scan     | Source File                                | Area ebraeus | Area judaeus | #Feature | #Feature ebraeus | #Feature judaeus | Start | End | PTM | AScore | Found By |
|------------------|------|--------|----------|--------|-----|----------|---|-------|----------|----------|--------------------------------------------|--------------|--------------|----------|------------------|------------------|-------|-----|-----|--------|----------|
| K.TELYSNR.Y      | Y    | 57.66  | 881.4243 | 7      | 5.6 | 441.7200 | 2 | 15.77 | 2        | F2:59839 | 20210611-09_2021021-OK160A_816_5.3.236.mgf |              | 0            | 0        | 0                | 0                | 20    | 26  |     |        | PEAKS DB |
| total 1 peptides |      |        |          |        |     |          |   |       |          |          |                                            |              |              |          |                  |                  |       |     |     |        |          |

CebrOK033\_J\_221\_Rimp01

[back to list](#)

| [Protein Coverage](#) | [Supporting Peptides](#) |

Protein Coverage:

1 IQYPTVRPIG PCSTNAISKT ELYSNRYGRY VLHYSYCSCA SGEVYFEAQD TTTSYTTVLY KIYACGAPTH SCSGETLPVT

81 DPDDRPRKMQ CTCEQYKYL YPRLGWLVR

Supporting Peptides:

| Peptide          | Uniq | -10lgP | Mass     | Length | ppm | m/z      | z | RT    | Fraction | Scan     | Source File                                | Area ebraeus | Area judaeus | #Feature | #Feature ebraeus | #Feature judaeus | Start | End | PTM | AScore | Found By |
|------------------|------|--------|----------|--------|-----|----------|---|-------|----------|----------|--------------------------------------------|--------------|--------------|----------|------------------|------------------|-------|-----|-----|--------|----------|
| K.TELYSNR.Y      | Y    | 57.66  | 881.4243 | 7      | 5.6 | 441.7200 | 2 | 15.77 | 2        | F2:59839 | 20210611-09_2021021-OK160A_816_5.3.236.mgf |              | 0            | 0        | 0                | 0                | 20    | 26  |     |        | PEAKS DB |
| total 1 peptides |      |        |          |        |     |          |   |       |          |          |                                            |              |              |          |                  |                  |       |     |     |        |          |

Peptide List
