# Supplementary material for: Comparative Venomics of the Cryptic Cone Snail Species Virroconus ebraeus and Virroconus judaeus
Source: Mar Drugs. 2022 Feb 17;20(2):149. doi: 10.3390/md20020149 (PMC8875821; doi:10.3390/md20020149)
Supplement: Supplementary file 1 [file marinedrugs-20-00149-s001.zip]

Archive with 9 entries (9 files):
- Supplementary Figures.pdf
- Supplementary File S1.html
- Supplementary File S2.txt
- Supplementary File S3.tree
- Supplementary File S4.xlsx
- Supplementary File S5.pdf
- Supplementary File S6.zip
- Supplementary Table S1.xlsx
- Supplementary Table S2.xlsx
