# Supplementary material for: Comparative Venomics of the Cryptic Cone Snail Species Virroconus ebraeus and Virroconus judaeus
Source: Mar Drugs. 2022 Feb 17;20(2):149. doi: 10.3390/md20020149 (PMC8875821; doi:10.3390/md20020149)
Supplement: Supplementary file 1 [file marinedrugs-20-00149-s001.zip › Supplementary File S2.txt]

Supplementary file S2  Alignments of conotoxin precursors, hormones, and other venom-related proteins derived 
from the Virroconus ebraeus and Virroconus judeus transcriptomes with homologues from closely-related cone snail species from West Africa (codes V_ and A_; Abalde et al, 2020) and 
Lautoconus ventricosus (code CV8; Pardos-Blas et al 2021) and from other cone species available in GenBank (the accession number follows the species name). 

Conotoxin precursor superfamilies

[Superfamily A-1]
[Framework I]

[alpha 4/7]  
[                                                       /------Signal---------/--------------Pro-------------/ /-CC----C-------C-------------------]

OK006_E_001                                             MGMRRMFTMFLLVVLATAVVSFTSDR-----ASDGRNAAA--KAFDRITLT-AR QGCCAYPDCAADHPELCGGGR----------------
CebrOK014_E_001                                         MGMRMTFTVFLLVVLATAVVSFTSAR-----ASGGRNTAA--RAFHRTARI-GA --CCFIKECAVSYPEECKDGFQTLAPPYVKRDVPPSA
OK006_E_002                                             MGMRMTFTVFLLVVLATAVVSFTSAR-----ASGGRNTAA--RAFHRTARI-GG --CCFIKECAVSYPEECKDGFQTLAPPYLKRDMPPSA
OK006_E_003                                             MGMRMTFTVFLLVVLATAVVSFTSAR-----ASGGRNTAA--RAFDRTSRR-GG HVCCFVKECAEQHPQWCEGGLQTVAPPYLKRDMPPSA
coronatusAGK23151                                       MGMRMMFTVFLLVVLATAVVSSTSDR-----ASDGRNTAS--KVFDLIALT-AR EDCCFIDDCWASHPEACGGGMELLRQDPLNRDMPPSA

SRX1323887_E_001                                        MGMRMMFTMFLLVVLATTVVSFTSDH-----ASDGRNTAANDKASDLMAL---R DGCCSNPSCSVNNPDICGGGR----------------
SRX1323887_E_002                                        MGMRMMFTMFLLVVLATTVVSFTSDH-----ASDGRNTAANDKASKLMAL---R NECCDNPPCKSSNPDLCDWRS----------------
ebraeusAGK23170                                         MGMRMMFTMFLLVVLATTVVSFTSDH-----ASDGRNTAANDKASDLMAL---R DGCCSSPSCSVNNPDICGGGR----------------

CebrOK014_E_002                                         MGMRMMFTVFLLVVLATAVVSFTSDR-----ASDDGKAAA----SDLITLT--I KGCCSRPPCIANNPDLCG-------------------
CebrOK016_E_001                                         MGMRMMFTVFLLVVLATAVVSFTSDR-----ASDDGKAAA----SDLITLT--I KGCCSRPPCIANNPDLCG-------------------
CebrOK033_J_001                                         MGMRMMFTVFLLVVLATAVVSFTSDR-----ASDDGKAAA----SDLITLT--I KGCCSRPPCIANNPDLCG-------------------

OK213_E_001                                             -----MFTMFLLVVLATAVVSFTLDR-----VSDGRNAVA--KAFDPMALI-AR DTCCMHSGCWEQYPERCNKG-----------------
SRX1323887_E_003                                        ----MTFTVFLLVVLATAVVSFNSDRG---PASDGGNAAA--KAFDLMALI-AR DDCCLVAACWQQYPGRCGGGR----------------
OK213_E_002                                             --MLMMFTVFRLVVLATTVVSFTSDR-----AFRGRNAAA--KASGLVGLTDKR QECCSYPACNLDHPELCG-------------------
SRX1323887_E_004                                        MGMRMMFTMFLLVVLATTVVSFTLDQ-----ASDGRNIAV--DDRWSFSTL-FH AVCCAYPHCRFMPG--C--------------------

OK212_J_001                                             MGMRMMFTMFLLVVLTTTVVSFNSDR-----ESNHENR----RTSNQITRG-MW DECCDDPPCRQNNME----------------------
OK213_E_003                                             MGMRMMFTVFLLVVLATAVVSFTSDR-----ESSHENR----RASNRILRG-LW VECCANPACRNTHFEHCPVN-----------------
OK193_E_001                                             MGMRMMFTVFLLVVLATAVVSFTSDR-----ESSHENR----RASNRILRG-LW VECCANPACRNTHFEHCPVN-----------------
leopardusA1X8C2                                         MGMRMMFTMFLLVVLTTTVVSFNSDR-----ESNHENR----RTSNQITRG-VW DECCKDPQCRQNHMQHCPAR-----------------
betulinusAMP44588                                       MGMRMMFTVFLLVVLATTVVSFAADR-----ESNHRNR----RASNQIPRG-LW AECCEDPPCRVNNMEHCPAN-----------------

CebrOK035_J_001                                         MGMRMMFIVFLLVVFASSV---TLDR-----ASHGRYAAVVNRASALMAHA-AL RDCCSDPPCAHNNPD-CR-------------------
SRX1323887_E_005                                        MGMRMMFVVFLLVVFASSV---TLDR-----ASYGRYASPVDRASALIAQA-IL RDCCSNPPCAHNNPD-CR-------------------
CebrOK035_J_002                                         MGMRMMFIVFLLVVFTSSV---TLDR-----AYHDRYAPVVDRASALMTQA-VL RGCCSDPPCAHHNPA-CG-------------------
CebrOK035_J_003                                         MGMRMMFIVFLLVVFTSSV---TLDR-----AYHDRYAPVVDRASALMTQA-VL RGCCSDPPCAHKY---CR-------------------
virgoF5C0A0                                             MGMRMMFVVFLLVVFASSV---TLDR-----ASYGRYASPVDRASALIAQA-IL RDCCSNPPCAHNNPD-CR-------------------
terebraAGK23288                                         MGMRMMFIVFLLVVFASSV---TLDR-----ASHGRYAAVVDRASALISQA-IL RDCCSNPPCAHNNPD-CR-------------------

OK193_E_002                                             ------------------VLPVTLDR-----ASDGRNAAANAKTPRLIAPF-IR DYCCHRGPCMVW----CG-------------------
OK005_J_001                                             --------------LATTVVSITLDR-----ATDGRNAAAIAKQSLLIAPI-IR GPCCRPPICSPY----CG-------------------
OK193_E_003                                             ---------FLLVVLATTVVSFPSDR-----ESDGTNAVARTDEPEEYDEL-DG NECCRNPDCTSHR---CR-------------------
SRX1323887_E_006                                        MGMRLVFTVFLLVILASTV---TLDR-----ASNGMNAAAIRKASALVAQI-AY RDCCDDPACTVNNPGLCT-------------------
leopardusAAS99934                                       MGMRMMFTVFLLVILASTV---TLDR-----ASNGMNAAAIRKASALVAQI-AY RDCCDDPACTVNNPGLCT-------------------


[Framework VI/VII]

[alpha 12/4/4/6]  
[                                                       /------Signal--------/------------Pro----------/ /--C------------C----CC----C------C--/]

SRX1323887_E_007	                                    ---RMVLTMFLLVVLATTVVSFTLDHASDGRGTAANDKATDQMALAVR VDLCDDANFVVDHPVLCGWDVCCAYPPCRHKHQDCNQGR
flavidusAFU50757                                        MGKRMVLTMFLLVVLATTVVSFTLDHASDSRGTAANDKATDQMALAVR LDWCDDADFLVDHPELCGWDVCCAYPPCRHKHQDCNQGR


[Framework I]
  
[alpha 4/4]
[                                                       /------Signal-------/-------Pro--------/ /-------CC----C----C/--------]

CebrOK016_E_002                                         MGMRMTFTVFLLVVLATAVVSFSSDRASHGRNAAAKVFDR IALIATRECCANPQCR--------------
OK213_E_004                                             MGMRMMFTVFLLVVLATAVVSFSSDRASHGRNAAAKVFDR IALIATRECCANPQCWAKNCR---------
OK213_E_005                                             MGMRMTFTVFLLVVLATAAVSFSSDRASHGRNAAAKVFDR IALIATRECCANPQCWAKNCR---------
OK193_E_004                                             MGMRMTFTVFLLVVLATAVISFSSDRASHGRNAAAKVFDR IALIATRECCANPQCWAKNCR---------
CebrOK033_J_002                                         MGMRMTFTVFLLVVLATAVVSFSSDRASHGRNAAAKVFDR IALIATRECCSNPQCWAKNCLGRR------
CebrOK035_J_004                                         MGMRMTFTVFLLVVLATAVVSFSSDRASHGRNAAAKVFDR IALIATRECCSNPQCWAKNCIGRR------
OK214_J_001                                             MGMRMTFTVFLLVVLATAVVSFSSDRASHGRNAAAKVFDR IALIATRECCSNPQCWAKNCIGRR------
OK212_J_002                                             MGMRMTFTVFLLVVLATAVVSFSSDRASHGRNAAAKVFDR IALIATRECCSNPQCWAKNCIGRR------
CebrOK035_J_005                                         MGMRMMFTVFLLVVLAAAVVSFTLDRASDGRNDAAKAFDW IALT--------------------------
quercinusAGK23186                                       MGMRMMFTVFLLVVLATAVVSFSSDRASHGRNAAAKVFDR IALIATRECCANPQCWAKNCR---------
ebraeusAGK23175                                         MGMRMMFTVFLLVVLATAVVSFTSDRASRGRNAAAKVFDR IALIATRECCANPQCWAKNCRGRRCYSRTL
ebraeusAGK23172                                         MGMRMMFTVFLLVVLATAVVSFSSDRASHGRNAAAKLFDR IALIATRECCANPQCWAKNCR---------


[Superfamily A-2]  
[Framework IV]
[Kappa 7/2/1/3]
[                                                       /------Signal-------/------Pro-------/ /----------CC-------C--C-C---C]

OK193_E_005                                             MGMRMMFTVFLLVVLATTVVSIPSDR--DGKNAAVHER QSWLVPSTITTCCGYSPGTMCPPCMCTNTC
OK193_E_006                                             MGMQMKFTVFLLVVLATTVVSIPSDR--DGKNAAVHER QSWLVPSTITTCCGYSPGTMCPPCMCTNTC
striolatusACZ49794                                      -----MFTVFLLVVLATTVVSIPSDRAYDGKNAAVHER QSWLVPSTITTCCGYSPGTMCPPCMCTNTC


[                                                       /------Signal-------/------Pro-------/ /----------CC-------C--C-C---C--/-Post--]

OK006_E_004	                                            MGMQMMFTVFLLVVLATAVVSFTSDRASDGRNAVVHER APELVVTATTTCCGYDPMTICPPCMCTHSCPPKRKPGRRND
OK005_J_002                                             MGMQMMFTVFLLVVLATTVVSIPSDRASDGRNAVVHER APELVVTATTTCCGYDPMTICPPCMCTHSCPPKRKPGRRND
OK213_E_006                                             MGMQMMFTVFLLVVLATTVVSIPSDRASDGRNAVVHER APELVVTATTTCCGYDPMTICPPCMCTHSCPPKRKPGRRND
OK212_J_003	                                            MGMRMTFTVFLLVVLATTVVSIPSDRASDGRNAVVHER APELVVTATTTCCGYDPMTICPPCMCTHSCPPKRKPGRRND
OK214_J_002	                                            ---------FLLVVLATTVVSIPSDRASDGRNAVVHER APELVVTATTTCCGYDPMTICPPCMCTHSCPPKRKPGRRND
magusQFQ60966                                           MGMQMMFTVFLLVVLATTVVSIPSDRASDGRNAVVHER APELVVTATTTCCGYDPMTICPPCMCTHSCPPKRKPGRRND

[No signal, no Framework]    

SRX1323887_E_008	                                    MGMRMMFTVFLLVVLATTVVPITLASATDGRNAAANARVSPVISKFSKKWCHPNPYTVG
OK193_E_007	                                            --------VFLLVVLATTVVPITLASATDGRNAAANARVSPVISKFSKKWCHPNPYTVG
SRX1323887_E_009	                                    MGMRMMFTVFLLVVLATTVVPITLASATDGRNAAADARMSPLISKFKKDYCHKYGYTIG
imperialisAME17659                                      MGMRMMFTVFLLVVLATTVVPITLASATDGRNAAADARMSPLISKFKKDYCHKYGYTIG

[Superfamily A2]                      
[Framework I]                       
[alpha 4/7]                         
[                                                       /-------Signal--------/---------Pro-------/ /-CC----C-------C--]

OK212_J_004                                             MRCLAFLVITLLLFTAMATTGASSRVDAASSGKASDSISLAVR DDCCPNPSCRQNNPKLCPSD
OK214_J_003	                                            MRCLAFLVVTLLLFTAMATTGASSRVDAASSGKASDSISLAVR DDCCPNPSCRQNNPKLCPSD
CebrOK033_J_003	                                        MRCLAFLVVTLLLFTAMATTGASSRVDAASSGKASDSISLAVR DDCCPNPSCRQNNPKLCPSD
CebrOK035_J_006                                         MRCLAFLVVTLLLFTAMATTGASSRVDAASSGKASDSISLAVR DDCCPNPSCRQNNPNLCPSD
ermineusAXL95539                                        MRCLAFLVVTLLLFTAMETTGASNRVNAAANGKTSDSISLAVR DDCCPDPSCRQNHPELCA--

[Superfamily B1 (Conantokin)]  
[No signal no Framework]
 
CebrOK035_J_007                                         -MQLYTHLYLLVH-LVTFYLILGTGTLGDGGALTERRSADATALKPEPVLLQKSAAR------------------STDDNGKDRLT--QMKRTLKKRG-----NTARGYENDRETAENIREL--EVAGKR--KRSIKLGVPRDTRQF
OK212_J_005                                             -MQLYTHLYLLVH-LVTFYLILGTGTLGDGGALTERRSADATALKPEPILLQKSAAR------------------TTDDNGK-----------------------------------------------------------------
CebrOK033_J_004                                         -----------------FYLILGTGTLGDGGALTERRSADVTALKPEPVLLQKSAAR------------------STDDNGKDRLT--RTKRIFIKRG-----NTARGYENDRETAENIREL--EVAGKRKRKRSIKLGVPRDTRQF
OK212_J_006                                             ------------------------GTLGDGGALTERRSADVTALKPEPVLLQKSAAR------------------STDDNGKDRLT--RTKRIFIKRG-----NTARGYENDRETAENIR---------------------------
OK005_J_003                                             -MQLYMHLYLLVS-VVTFYLILGTGTLGDGGALTERRSADATALKPEPVLLQKSAAR------------------STDDNGKDRLT--RTKRIFIKRG-----NTARGYENDRETAENIREL--EVAGKRKRKRSIKLGVPRDTRQF
CebrOK035_J_008                                         -MQLYTHLYLLVH-LVTFYLILGTGTLGDGGALTERRSADATALKPEPVLLQKSAAR------------------STDDNGKDRLT--RTKRIFIKRG-----NTARGYENDRETAENIREL--EVAGKR--KRSIKLGVPRDTRQF
OK212_J_007                                             -MQLYTHLYLLVS-VVTFYLILGTGTLGDGGALTERRSADATALKPEPILLQKSAAR------------------TTDDNGK-----------------------------------------------------------------
OK005_J_004                                             -MQLYMHLYLLVS-VVTFYLILGTGTLGDGGALTERRSADATALKPEPVLLQKSAAR------------------STDDNGKDTLT--QMRRIFIKRG-----NTARGYENDRETAENIREL--EVAGKRKRKRSIKLGVPRDTRQF
							                            
OK005_J_005                                             -MQLYMHLYLLVS-VVTFYLILGTGTLGDGGALTERRSADATALKPEPVLLQKSAAR------------------STDDNGKDRLT--RTKRIFIKRG-----NTARGYEEDREVAETVREL--DEHGKR-----------------
CebrOK033_J_005                                         -MQLYMHLYLLVS-VVTFYLILGMGTLAHGGALTERRSADATALKPEPILLQKSAAR------------------STDDNGKDRLT--QMKRTLKKRG-----NVATDRE---EILETIREL--NESGKR-----------------
CebrOK033_J_006                                         -MQLYMHLYLLVS-VVTFYLILGMGTLAHGGALTERRSADATALKPEPVLLQKSAAR------------------GTDDNGKD----------------------------------------------------------------
OK213_E_007                                             ---------------------------------TERRSADATALKPEPVLLQKSAAR------------------STDDNGKDTLT--QMKRTLKKRG-----NVATDRE---EILETIREL--NESGKR-----------------
OK212_J_008                                             -MQLYTHLYLLVP-LVTFYLILGTGTLGDGGALTERRSADATALKPEPVLLQKSAAR------------------STDDNGKDTLT--QMKRTLKKRG-----NVATDRE---EILETIREL--NESGKR-----------------
OK005_J_006                                             -MQLYMHLYLLVS-VVTFYLILGTGTLGDGGALTERRSADATALKPEPVLLQKSAAR------------------STDDNGKDTLT--QMKRTLKKRG-----NVATDRE---EILETIREL--NESGKR-----------------
OK214_J_004                                             -MQLYTHLYLLVP-LVTFYLILGTGTLGDGGALTERRSADATALKPEPILLQKSAAR------------------STDDNGKDTLT--QMKRTLKKRG-----NVATDRE---EILETIREL--NESGKR-----------------
OK213_E_008                                             -MQLYTHLYLLVP-LVTFYLILGTGTLGDGGALTERRSADVTALKPEPVLLQKSAAR------------------STSDNGKDRLT--QMKRTLKKRG-----NVATDRE---EILETIREL--NESGKR-----------------
							                            
CebrOK033_J_007                                         -MQLYMHLYLLVS-VVTFYLILGMGTLAHGGALTERRSADATALKPEPVLLQKSAAR------------------STDDNGKDRLT--QMKRTLKKRG-----NTARGYEEDREVAETVREL--DEHGKR-----------------
CebrOK035_J_009                                         -----------------------------GGALTERRSADATALKPEPVLMQKSAAR------------------STDDNGKDRLT--QMKRTLKKRG-----NTARGYEEDREVAETVREL--DEHGKR-----------------
OK214_J_005                                             -MQLYTHLYLLVP-LVTFYLILGTGTLGDGGALTERRSADATALKPEPILLQKSAAR------------------STDDNGKDTLT--QMKRTLKKRG-----NTARGYEEDREVAETVREL--DEHGKR-----------------
OK212_J_009                                             -MQLYTHLYLLVP-LVTFYLILGTGTLGDGGALTERRSADATALKPEPVLLQKSAAR------------------STDDNGKDTLT--QMKRTLKKRG-----NTARGYEEDREVAETVREL--DEHGKR-----------------
OK005_J_007                                             -MQLYMHLYLLVS-VVTFYLILGTGTLGDGGALTERRSADATALKPEPVLLQKSAAR------------------STDDNGKDTLT--QMKRTLKKRG-----NTARGYEEDREVAETVREL--DEHGKR-----------------
CebrOK035_J_010                                         -----------------------------GGALTERRSADATALKPEPVLMQKSVAR------------------STDDNGKDRLT--LMKRILKKRG-----NTARGYEEDREVAETVREL--DEHGKR-----------------
OK212_J_010                                             -MQLYTHLYLLVP-LVTFYLILGTGTLGDGGALTERRSADATALKPEPVLLQKSAAR------------------STDDNGKDTLT--QMKRTLKKRG-----NTARGYENDRETAENIREL--EVAGKRKRKRSIKLGVPRDTRQF
CebrOK035_J_011                                         -----------------------------GGALTERRSADATALKPEPVLMQKSAAR------------------STDNNGKDRLT--QMKWIVKKRG-----NTARGYEEDREVAETVREL--DEHGKR-----------------
OK213_E_009                                             -MQLYTHLYLLVP-LVTFYLILGTGTLGDGGALTERRSADVTALKPEPVLLQKSAAR------------------STSDNGKDRLT--QMRRIFIKRG-----NTARGYEEDREVAETVREL--DEHGKR-----------------
OK006_E_005                                             -MQLYTHLYLLVP-LVTFYLILGTGTLGDGGALTERRLADVTALKPEPILLQKSAAR------------------STSDNGKDRLT--QMRRIFIKRG-----NTARGYEEDREVAETVREL--DEHGKR-----------------
OK006_E_006                                             -MQLYTHLYLLVP-LVTFYLILGTGTLGDGGALTERRLADVTALKPEPILLQKSAAR------------------STSDNGKDRLT--QMRRIFIKRG-----NTARGYENDRETAENIREL--EVAGKRKRKRSIKLGVPRDTRQF
OK006_E_007                                             -MQLYTHLYLLVP-LVTFYLILGTGTLGDGGALTERRLADVTALKPEPILLQKSAAR------------------STSDNGKDRLT--QMRRIFIKRG-----NVATDRE---EILETIREL--NESGKR-----------------
CebrOK035_J_012                                         -----------------------------GGALTERRSADATALKPEPVLMQKSVAR------------------STDDNGKDKFT--QMKRILKKRG-----NTARGYEEEREVAETVREL--EEAGKRKR---------------
OK214_J_006                                             -----------------FYLILSTGTLGDGGALTERRSADATALKPEPSLLQKSAAR------------------STDDTGKDTLT--QMKRTLKKRG-----NTARGYVENRGVAETVREL--DEHGKR-----------------
CebrOK014_E_003                                         -MQLYTHLYLLVP-LVTFYLILGTGTLGDGGALTERRSADVTALKPEPVLLQKSAAR------------------STSDNGKDRLT--QMRRIFIKRG-----NTARGYEDDAEDVEYIGDL--EEL--------------------
OK213_E_010                                             -MQLYTHLYLLVP-LVTFYLILGTGTLGDGGALTERRSADVTALKPEPVLLQKSAAR------------------STSDNGKDRLT--QMRRIFIKRG-----NTARGYEDDAEDVEYIGDL--EEL--------------------
OK193_E_008                                             -MQLYTHLYLLVP-LVTFYLILGTGTLGDGGALTERRSADVTALKPEPVLLQKSAAR------------------STSDNGKDRLT--QMRRIFIKRG-----NTARGYEDDAEDVEYIGDL--EEL--------------------
SRX1323887_E_010                                        -MQLYTHLYLLVP-LVTFYLILGTGTLGDGGALTERRSADVTALKPEPVLLQKSAAR------------------STSDNGKDRLT--QMRRIFIKRG-----NTARGYEDDAEDVEYIGDL--EEL--------------------
OK006_E_008                                             -MQLYTHLYLLVP-LVTFYLILGTGTLGDGGALTERRLADVTALKPEPILLQKSAAR------------------STSDNGKDRLT--QMRRIFIKRG-----NTARGYEDDAEDVEYIGDL--EEL--------------------
CebrOK016_E_003                                         -MQLYTHLYLLVP-LVTFYLILGMGTLAHGGALTERRSADVTALKPEPVLLQKSAAR------------------STSDNGKDRLT--QMRRIFIKRG-----NTARGYEDDAEDVEYIGDL--EEL--------------------
CebrOK033_J_008                                         -MQLYTHLYLLVP-LVTFYLILGTGTLGDGGALTERRSADATALKPEPILLQKSAAG------------------STDDKGKDRLT--QMKRILKKRG-----SEEA--EEIREAMETLHEL--SY---------------------
OK214_J_007                                             --------------------------------LTERRSADATALKPEPVLLQKSAAG------------------STDDKGKDRLT--QMKRILKKRG-----SEEA--EEIREAMETLHEL--SY---------------------
OK212_J_011                                             -MQLYTHLYLLVP-LVTFYLILGTGTLGDGGALTERRSADATALKPEPVLLQKSAAG------------------STDDKGKDRLT--QMKRILKKRG-----SEEA--EEIREAMETLHEL--SY---------------------
OK005_J_008                                             -MQLYTHLHLLVP-LVTFDLILGTGTLGDGGALSERRSADATALKPEPILLQKSAAG------------------STDDKGKDRST--QMKRILKKRG-----SEEA--EEIREAMETLHEL--SY---------------------
OK006_E_009                                             -MQLYTHLYLLVP-LVTFYLILGTGTLGDGGALTERRLADVTALKPEPILLQKSAAG------------------STDDKGKDRLT--QMKRILKKRG-----SEEA--EEIREAMESLHEL--SR---------------------
CebrOK035_J_013                                         -MQLYTYLYLLMP-LVAFHLILGTGTLGHGGALTERRSADATALKPEPVLMQKSVAR------------------STDDNGKDRFT-------------------------------------------------------------
CebrOK033_J_009                                         -MQLYTHLCLLVP-LVT-YLILGTGTLAHGGALTERRLADARAMEPDPVILQNSAAR------------------STDD--------------------------------------------------------------------
CebrOK035_J_014                                         -----------------------------GGALTERRSADATALKPEPVLMQKSAAR------------------STDDNGKDRST--RRKRIFKKRG-----LN----EDFSEVNES--SF--VGEGKRK----------------
eburneusADZ72979                                        -MHLYTYLYLLVP-LVTFHLILGTGTLAHGGALTERRSADATALKPEPVLLQKSAAR------------------STDDNGKDRLT--QMNRILKKRG-----NAARDAEEVRESAETLHEI--SVY--------------------
magusQFQ60970                                           -MQLYTHLYLLVP-LVTFHLILGTGTLDHGGALTERRSADATALKPEPVLLQKSAAR------------------STDDNGKDRLT--QMKRILKKRG-----NKARGEPEARSIPEAVRQQ--ECIRNNNNRP----WCPK-----
ermineusAXL95339                                        -MQLYTYLYLLMP-LVAFHLILGTGTLADGDSLTERRSADATALKPEPVLLQKSAAR------------------STDDNGEDRLT--QMKRILKKRG-----KKARGFEESREAAENVREL--MNAGK------------------
flavidusAFU50792                                        -MQLYTHLYLLVP-LVAFHLILGTGTLAHGDALTERRSADATALKPEPVLLQKSAAR------------------STDDNDRDRLT--QRKRILKKQG-----NMARGYEEDREIAETIREL--NEAGK------------------
flavidusAFU50791                                        -MQLYTHLYLLVP-LVAFHLILGTGMLAHGDALTERRSADATALKPEPVLLQKSAAR------------------STDDNDRDRLT--QRKRILKKRG-----NTARGYEEDWEYWETIRKL--TEAGK------------------
flavidusAFU50790                                        -MQLYTHLYLLVP-LVAFHLILGTGMLAHGDALTERRSADATALKPEPVLLQKSAAR------------------STDDNDRDRLT--QRKRILKKRG-----NTARGYEDHREIAETIREL--QVP--------------------
											            
CebrOK033_J_010                                         MMQSSTCMCLLVPLLLFFHLTQRSDTADHGWAATDVRSADHS-LKRFLHDFRRARKR------------------RSDGRYARKQD-LSVNLDSKILA-----EKHRL-KQVEDSQEKLENA-----GR------------------
CebrOK035_J_015                                         MMQSSTCMCLLVPLLLFFHLTQRSDTADHGWAATDVRSADHS-LKRFLHDFRRARKR------------------RSDGRYARKQD-LSVNLDSKILA-----EKHRL-KQVEDSQEKLENA-----GR------------------
OK212_J_012                                             MMQSSTCMCLLVPLLLFFHLTQRSDTADHGWAATDVRSADHS-LKRFLHDFRRARKR------------------RSDGRYARKQD-LSVNLDSKILA-----EKHRL-KQVEDSQEKLENA-----GR------------------
OK214_J_008                                             MMQSSTCMCLLVPLLLFFHLTQRSDTADHGWAATDVRSADHS-LKRFLHDFRRARKR------------------RSDGRYARKQD-LSVNLDSKILA-----EKHRL-KQVEDSQEKLENA-----GR------------------
OK005_J_009                                             -MQSSTCTCLLVPLLLFFHLTQRSDTADHGWAATDVRSADHS-LKRFLHDFRRARKR------------------RSDGRYARKQD-LSVNLDSKILA-----EKHRL-KQVEDSQEKLKNA-----GR------------------
OK005_J_010                                             -MQSSTCTCLLVPLLLFFHLTQRSDTADHGWAATDVRSADHS-LKRFLHDFRRARKR------------------RSDGRYARKRD-ISVNLPMEVLAGEVRSEEQRQ-EQADASAELLREL-----GR------------------
SRX1323887_E_011                                        -MQSFTCMCLLVP-LLFFHLAQRSDTAGHGGAATDVRSADHT-LKRFHHDFRQAPKR------------------RSNDRYDRRRS-LSMDVTIEFLS-----EGVRE-ASRERA-EDSREA-----SV------------------
CebrOK035_J_016                                         -----------------------SDTADHEGAAMEVRSADHN-LKRFLHDFRRAPKR------------------NYDRRNKLELL--STDIDMQLFN-----ELYRK-EQ-EQSVEGSKALL-ERRGR------------------
CebrOK035_J_017                                         -----------------------SDTADHEGAAMEVRSADHN-LKRFLHDFRRAPKR------------------SYDRRNKWKWT-RSAPLDTQLLA-----DRDRE-EKREERVEKSHELYCLWKG-------------------
flavidusAFU50794                                        -MQSFTCMCLLVP-LLFFHLTQRSDTAGHGGAATDVRSADHV-LKRFYHDFRRAPKR------------------RSNDRYNRRQS-TSVSLPLEILA-----EQTRE-RSREASVEHLREI-----GR------------------
                                                          
OK193_E_009                                             -MQLFTCLCLLVPLMLFFHLTH-PVTAGHERAATEVRSADHT-LKRFVHHVHQAQKRGPVLSRTSTLQDPHNDDNDNDGDKKRRIDNLSVFLDMKVLAEI---MKNQR-KKIEEAKANLDHL-----GR------------------
OK213_E_011                                             -MQLFTCLCLLVPLMLFFHLTH-PVTAGHERAATEVRSADHT-LKRFVHHVHQAQKRGPVLSRTSTLQDPHNDDNDNDGDKKRRIDNLSVFLDMKVLAEI---MKNQR-KKIEEAKANLDHL-----GR------------------

[Superfamily B2]  
[No signal no Framework] 

CebrOK014_E_004                                         MLRLIIAAVLASACLAFPQRRDGAPANVDPNLQPFGG----------VIPN---MQP-----MQG----MTG-MP-SP--QFLPFNPNFA-VGLKR---ENLEKRRHNPQFSDNNQSPFGS-EDDLD--SFMNFMKENGNNLPFADVNSA-ATDLGHFEPSDE--NEAGKFRFFDKEQ
CebrOK016_E_004                                         MLRLIIAAVLASACLAFPQRRDGAPANVDPNLQPFGG----------VIPN---MQP-----MQG----MTG-MP-SP--QFLPFNPNFA-VGLKR---ENLEKRRHNPQFSDNNQSPFGS-EDDLD--SFMNFMKENGNNLPFADVNSA-ATDLGHFEPSDE--NEAGKFRFFDKEQ
OK213_E_012                                             MLRLIIAAVLASACLAFPQRRDGAPANVDPNLQPFGG----------VIPN---MQP-----MQG----MTG-MP-SP--QFLPFNPNFA-VGLKR---ENLEKRRHNPQFSDNNQSPFGS-EGDLD--SFMNFMKENGNNLPFADVNSA-ATDLGHFEPSDE--NEAGKFRFFDKQQ
OK193_E_010                                             MLRLIIAAVLASACLAFPQRRDGAPANVDPNLQPFGG----------VIPN---MQP-----MQG----MTG-MP-SP--QFLPFNPNFA-VGLKR---ENLEKRRHNPQFSDNNQSPFGS-EGDLD--SFMNFMKENGNNLPFADVNSA-ATDLGHFEPSDE--NEAGKFRFFDKEQ
SRX1323887_E_012                                        MLRLIIAAVLASACLAFPQRRDGAPANVDPNLQPFGG----------VIPN---MQP-----MQG----MTG-MP-SP--QFLPFNPNFA-VGLKR---ENLEKRRHNPQFSDNNQSPFGS-EGDLD--SFMNFMKENGNNLPFADVNSA-ATDLGHFEPSDE--NEAGKFRFFDKEQ
CebrOK016_E_005                                         MLRLIIAAVLASACLAFPQRRDGAPENADPNLQPFGG----------VIPN---MQP-----MQG----MTG-MP-SP--QFLPFNPNFA-VGLKR---ENLEKRRHNPQFSDNNQSPFGS-EDDLD--SFMNFMKENGNNLPFADVNSA-ATDLGHFEPSDE--NEAGKFRFFDKEQ
OK213_E_013                                             MLRLIVAAVLASACLAFPQRRDGAPAHVDPNLQPFGG----------VIPN---MQP-----MQG----MTG-MP-SP--QFLPFNPNFA-VGLKR---ENLEKRRHNPQFSDNNQSPFVS-EGDLD--SFMNFMKENGNNLPFADVNSA-ATDLGHFEPSDE--NEAGKFRFFDKEQ
OK006_E_010                                             --RLIIAAVLASACLAFPQRRDGAPANVDHNLQPFGGAL--------TIPN---MQP-----MQG----MTG-MP-SP--QFLPFNPNFA-VGLKR---KNLEKRRHNPQFSDNNQSPFGS-EGDLD--SFMNFMQENGNNLPFADVNSA-ATDLGHFEPSDE--NEAGKFHFFDKEQ
OK214_J_009                                             ------AAVLASACLAFPQRRDGAPANVDPNLQPFGGAL--------TIPN---MQP-----MQG----MTG-MP-SP--QFLPFNPNFA-VGLKR---ENLEKRRHNPQFSDNNQSPFGS-EGDLD--SFMNFMKENGNNLPFADVN------------------------------
SRX1323887_E_013                                        MLRLIIAAVLASACLAFPQRRDGAPANVDPNLQPFGGAM--------ALPN---MQP-----MQG----MTG-MP-SP--QFLPFNPNFA-VGLKR---ENLEKRRHNPQFSDNNQSPFGS-EGDLD--SFMNFMKENGNNLPFADVNSA-ATDLGHFEPSDE--NEAGKFRFFDKEQ
OK006_E_011                                             MLRLIIAAVLASAFLAFPQRRDGAPANVDPNLQPFGGAL--------TIPN---MQP-----MQG----MTG-MP-SP--QFLPFNPNFA-VGLKR---ENIEKRRHNPQFSDNNQSPFGS-EGDLD--SFMNFMKENGNNLPFADVNSA-ATDLGHFEPSDE--NEAGKYRFFDKEQ
OK193_E_011                                             ------------------------------------G----------VIPN---MQP-----MQG----MTG-MP-SP--QFLPFNPIFA-VGLKR---ENLEKRRHSPQFSDNNQSPFGS-EGDID--SFMNFMKENGNNLPFADVNSA-ATDLGHFEPSDE--NEAGKFRSFDKEQ
OK006_E_012                                             MLRLIIAAVLASACLAFPQRRDGAPENADPNLQPFGGAL--------TIPN---MQP-----MQG----MTG-MP-SP--QFLPFNPNFA-VGLKR---ENLEKRRHNPQFSDNNQSPFGS-EGDLD--SFMNFMKENGNNLPFANMDSA-ATDLGHFEPSAE--NEAGKFRFFDKEQ
OK005_J_011                                             MLRLIIAAVLASACLAYPQRRDGAPANVDPNLQPFGG----------VIPN---MQP-----MQG----MTG-MP-SP--QFLPFNPNFA-VGLKR---ENLEKRRHNPQFSDNNQSPFGS-EGDLD--SFMNFMKENGNNLPFANMDSA-ATDLGHFEPSAE--NEDGKFRFFDKEQ
OK006_E_013                                             MLRLIIAAVLASASLAFPQRRNGAPANVDPNLQPSGGAL--------TIPI---MQP-----LQG----MTG-MP-SP--QFLPFNPNFA-VGLKR---KNLEKRRHNPQFSDNNQSPFGS-EGDLD--SFMNFMQENGNNLPFADVNSA-ATDLGHFEPSDE--NEAGKFHFFDKEQ
OK212_J_013                                             ----------ASAFFAFPQRRVGAPANVDPYLQPFGG----------VIPN---MQP-----MQG----MTG-MP-SP--QFLPFNPNFA-VGLKR---ENLEKRRHNPQFSDNNQSPFGS-EGDLD--SFMNFMKENGNTLPFANMD------------------------------
OK213_E_014                                             ------------------------PANVDPNLQPFGG----------VIPN---MQP-----MQG----MPG-MP-SP--QCLPFKPNFA-VGLKR---ENLEKRRHNPQFSDNNQSPFGS-EGDLD--SFVNFMKENGNNLPIADVNSA-ATVLG----------------------
OK213_E_015                                             -------------------------ANVDHNLQLFGG----------VIPN---MQP-----MQG----MTG-MP-RP--QFLPFNPNFA-VGLKR---ENLEKRRHNPQFSDNNQTPFGS-EGDLD--SVMNFMKEIGNNLPFADVNSA-ATALGHFEPSDE--NEAGKFRLFDKEQ
OK193_E_012                                             ------------------------------NLQFFGG----------VLPN---MQP-----MQG----MTG-MP-SP--QILPFNPTFA-VGLKR---ENQEKRRHNPQLSDNNQSPFGS-EGDLD--SFMNFMKENGNNLPFADENSA-ATDLGHFEPSDE--NKAGKFRFFDQEQ
OK193_E_013                                             --RLIIDAVLASACLAFPQRRDGAPANVDPNLQPFGG----------VIPN---MQP-----MQG----MTG-MP-RP--QFLPFNPNFA-VGLKR---ENLEKRRNNPQFRDNNQSPFGS-EGDPD--SFMNFVKENGNNLLFADVNSA-AIELGHSEPSDE--NEAGKFRFCDKEQ
OK193_E_014                                             ---------------------------------------------------------------------------------------------------ENLEKRRHNPQFSDNNQSPFVS-EGDLD--SFMNIMKENGNNHPFADVNSA-ATDLGHFESSDE--NEDGKFRFFDKAQ
OK193_E_015                                             --------------------------------------------------------------MQG----MTG-MP-RP--QFLPFNHNFA-VGFKR---ENLEKRRHNPQFCDNNQSPFGS-VGDLD--SFMNFMKENGNNLPFEDVNGA-ATDLGHFDPSDE--NEAGKFRFFDKEQ
OK193_E_016                                             --------------------------------------------------------------------------------QFLPFNPNFA-EGLKR---ENIEKRRHNPQFSDNNQSPFGS-EGDLD--GFMNFMKENSNNLPFADGNSA-ATDLGYFEPRDQ--KEAGKFRFFD---
OK006_E_014                                             -------------------------------------------------------------------------------------------VGLKR---ENLEKRRNNPQFSDNIQSPFGS-ERDLV--RFMNFMKENGNILSFADVNSA-ATDLGHFEPSDE--NEAGKCRFFDKEQ
OK193_E_017                                             ----------------FPQGRDGAPANVDPNLKPFGG----------VIPI---MQP-----MQG----MTG-MP-SP--QFLPFNPNFA-VVLKR---ENLEKRRHNPQFSYNNQSPFGS-EVDLD--SFMNFMKENG-NLPIANMDGA-AAELGKFEPSAEKGQKEGQLRFFDKHQ
OK006_E_015                                             MLRLIIAAVLDSACLAFPQRRDAAPENADPNLQPFGEAL--------TIPN---MQP-----MQG----MTG-MS-SP--QFLPFIPNFA-VGLKR---EILEKRSHNPQFSDNNQSLFGS-EGD-----------------------------------------------------
OK213_E_016                                             MLRQIIAAVLASACLAFPQRGDGAPANVDPNHQPFGG----------VIPN---MQP-----MQG----MTG-MP-SP--QFRPFNTKFA-VGLKR----------------------------------------------------------------------------------

CebrOK014_E_005                                         --------------------------------------------------------------------------------QFMPFNPGFGAMGYKRDLDEDLEQKRHHSQFNEDNISPFNS-DEGLG--NFMNFMKDNGNDLPFANVDSD-DLGLDSFQPSAG--NEEGKFRFFDGQQ
OK213_E_017                                             MLRLIIAAVLVCACLAYPQKRDGAPADAA-NLQGFDQGMM-------AMPN---MQP-----MQP----MPM-MGMQG--QFMPFNPGFGAMGYKRDLDEDLEQKRHHSQFNEDNISPFNT-EEGLG--NFMNFM-DNGNNLPFANMDSD-DLGLDSFQPSAE--NEEGKFRFFDGQQ
CebrOK016_E_006                                         MLRLIIAAVLVCACLAYPQKREGAPADAA-NLQGFDQGMM-------AMPNMQPMQP-----MQP----MPM-MGMQG--QFMPFNPGFGAMGYKRDLDEDLEQKRHHSQFNEDNISPFNS-DEGLG--NFMNFMKDNGND-------------------------------------
OK005_J_012                                             MLRLIIAAVLVCACLAYPQKRDGAPADAA-NLQGFDQGMM-------AMPN---MQP-----MQP----MPM-MGMQG--QFMPFNPGFGAMGYKRDLDEDLEQKRHHSQFNEDNISPFNT-EEGLG--NFMNFMKENGNNLPFANMDSA-ATDLGHFEPSAE--NEDGKFRFFDKEQ

CebrOK014_E_006                                         -----IAAVLASACLAYPQRRDGAPANAAPNLQPFNGEM--------AMPN---MQP-----MHALPMSMSG-MS-SP--QLMPLNPNLG-MGFKR---ENLEKRRQHSQFSDDNKSPFDS-EDGLG--NFMNFMKDNGNDLPFANVDSD-DLGLDSFQPSAG--NEEGKFRFFDGQQ
CebrOK033_J_011                                         MLRLIIAAVLASACLAYPQRRDGAPANAAPNLQPFNGEM--------AMPN---MQP-----MHALPMSMSG-MS-SP--QLMPLNPNLG-MGFKR---ENLEKRRQHSQFSDDNKSPFDS-EDGLG--NFMNFMKENGNNLPFANMDSA-ATDLGHFEPSAE--NEDGKFRFFDKEQ
CebrOK035_J_018                                         MLRLIIAAVLASACLAYPQRRDGAPANAAPNLQPFNGEM--------AMPN---MQP-----MHALPMSMSG-MS-SP--QLMPLNPNLG-MGFKR---ENLEKRRQHSQFSDDNKSPFDS-EDGLG--NFMNFMKENGNNLPFANMDSA-ATDLGHFEPSAE--NEDGKFRFFDKEQ
OK214_J_010                                             MLRLIIAAVLASACLAYPQRRDGAPANAAPNLQPFNGEM--------AMPN---MQP-----MHALPMSMSG-MS-SP--QLMPLNPNLG-MGFKR---ENLEKRRQHSQFSDDNKSPFDS-EDGLG--NFMNFMKENGNNLPFANMDSA-ATDLGHFEPSAE--NEDGKFRFFDKEQ
OK212_J_014                                             MLRLIIAAVLASACLAYPQRRDGAPANAAPNLQPFNGEM--------AMPN---MQP-----MHALPMSMSG-MS-SP--QLMPLNPNLG-MGFKR---ENLEKRRQHSQFSDDNKSPFDS-EDGLG--NFMNFMKENGNNLPFANMDSA-ATDLGHFEPSAE--NEDGKFRFFDKEQ
OK005_J_013                                             MLRLIIAAVLASACLAYPQRRDGAPANAAPNLQPFNGEM--------AMPN---MQP-----MHALPMSMSG-MS-SP--QLMPLNPNLG-MGFKR---ENLEKRRQHSQFSDDNKSPFDS-EDGLG--NFMNFMKENGNNLPFANMDSA-ATDLGHFEPSAE--NEDGKFRFFDKEQ
OK213_E_018                                             MLRLIIAAVLASACLAFPQRRDGAPANAAPNLQPFNGEM--------AMPN---MQP-----MHALPMSMSG-MS-SP--QLMPLNPNLG-MGFKR---ENLEKRRQHSQFSDDNKSPFDS-EDGLG--NFMNFMKENGNNLPFADVNSA-ATDLGHFEPSAE--NEDGKFRFFD---
CebrOK016_E_007                                         MLRLIIAAVLASACLAFPQRRDGAPANAAPNLQPFNGEM--------AMPN---MQP-----MHALPMSMSG-MS-SP--QLMPLNPNLG-MGFKR---ENLEKRRQHSQFSDDNKSPFDS-EDGLG--NFMNFMKE-----------------------------------------
OK006_E_016                                             MLRLIIAAVLASACLAFPQRRDGAPANAAPNLQPFNGEM--------AMPN---MQP-----MHALPMSMSG-MS-SP--QLMPLNPNLG-MGFKR---ENLEKRRQHSQFSDDNKSPFDS-EDGLG--NFMNFMKENGNNLPFANMDSA-ATDLGHFEPSAE--NEAGKFRFFDKEQ
OK212_J_015                                             --------------------------------------------------------------------------------QLMPLTPNLG-MGFKR---ENLEKRRQHSQFSDDNKSPFDS-EDGLG--NFMNFMKENGNNLPFANMDSA-ATELGHFEPSAE--NEDGKFRFFDKEQ

CebrOK035_J_019                                         ----IIAAVLASACLAYPQRREGAPAEAA-NLQGFDQ----------GMPN---MQGMGLQPMQA----MPG-MG-AG--QMLPFNPNFG-LGYKRAFDENLEKRREHSKFNDDNKSPFES-EDSLG--NFMNFMKDNGNSFPFANMDNG-APDLDNFQPSAE--NEDSKFNFFDQQQ
CebrOK035_J_020                                         MLRLIIAAVLASACLAFPQRREGAPADMA-NLKSFDPGMQAMQGP-MPGPN---LQG-----MQG----MPGSMA-TG--QFLPFNPNLG-FGFKRAADENLEKR-------------------------------------------------------------------------
SRX1323887_E_014                                        ----IIAAVLASACLAFPQRREGAPADMA-NLKAFDPGMQAMQGP-MPGPN---LQG-----MQG----MPGSMA-TG--QFLPFNPNLG-FGFKRAADETLEKRKHHADFKE-DAAPFQN-EEGAF--DLSAFLKQNADRLPFANIEGD-TADLGNFEPSAE---QENQFRFFDKQQ
OK212_J_016                                             MLRLIIAAVLASACLAYPAKRDGAPGDSA-NLQSFGPGMM------QAMPN---MQG-----MQQ---PMQA-MP-AG--QFMPFNPNLG-IGYKRAVYEDREERRPHSKFND-NKSPFEQ-EGGLG--NFMNFMKENG-NLPFANMDGA-AADLGKFEPSAEKGQKEGQFRFFDKQQ
SRX1323887_E_015                                        MLRLITAAVLVSVCLAYPQKKEGTPADQP-NLQGFAPGFQ-------PMLN-----------MQP----MQG-MP-GQ--QLLPFNPG---FGYKRAF-ENLHERRPHAKFSD-NKSPFGS-EDGLD--KFMNFMKEN-DKLPFANMDGA-PADLGSFEQGAENDQQDGKFRFFDKQQ
SRX1323887_E_016                                        MLRLVLAAVLVSACLAFPQRRDGAPAEGA-NLQSFGAGM---------MPN---MQQ----------------MP-AG--QFLPFNPNFAGMGYKRAAEENPEERREHSNFHADSKLPFDSPEGGFG--DFMNFMNENRDKLPFGNMDGA-PAELGNLEPSSENDQEENQFRFFDQQQ
betulinusAMP44597                                       MLRLIIAAVLASACLAYPQKRDGAPADTA-NLQPFNQGMQAM----PAFPN---MQG-----MQG----MPG-MA-GG--QFLPFNPNLG-IGYKRDVDENLEKRRQHSKFNEGNKSPFDA-EGGFG--NFMNFMKENSNNLPFANMDSA-ATDLGNFEPSAE--NEDGKFRFFDKQQ
ermineusAXL95472                                        MLRLIIAAVLASACLAFPERRDGVPAEQA-NLQSFDPAAQ-------AMPA---MAG-----MQP----MPG-MT-GG--QFLPFNPNFG-MAYKRDMDESLEKRRQHSQFNADNESPFEA-DDNLG--GFMNFMKGSGNNVPFANMDSD-ATDLGNFQPSAE--NEDGKFRFFDKQQ

OK214_J_011                                             MLRMITAAVLVSACLAYPQKRDGAPADTA-NLQGFGQPMP-------AMPN---MQG-----MQ-----MSG-MSMPG--MQNPFLP-FG-MGFKRDLDEDLEKRKHHSKFNEGNNSPFGS-EADPE--SFMNFMKGNGDNFPFANMDSADTADLGNFQ-------------------
OK005_J_014                                             MLRLITAAVLVSACLAYPQKKEDAPPDTA-NLQGFGQPMP-------AMPN---MQG-----MQ-----MPG-MQMPGMPMQNPFLP-FG-MGFKRDLDEDLEKRKHHSKFNEGNNSPFGS-EADPE--SFMNFMKGNGDNFPFANMDSADTADLGNFQPSE---NEDGKFRFFDKEQ
OK213_E_019                                             MLRLITAAVLVSACLAYPQKKEDAPADTA-DLQGFGQPMP-------AMPN---MQG-----MQ-----MPG-MQMPGMPMQNPFLP-FG-MGFKRDLDEDLEKRKHHSKFNEGNNSPFGS-EADPE--SFMNFMKGNGDNFPFANMDSADTADLGNFQPSE---NEDGKFRFFDKQQ
SRX1323887_E_017                                        MLRLITAAVLVSACLAYPQKKEDAPADTA-NLQGFGQPMP-------AMPN---MQG-----MQ-----MPG-MQMPGMPMQNPFLP-FG-MGFKRDLDEDLEKRKHHSKFNEGNNSPFGS-EADPE--SFMNFMKGNGDNFPFANMDSADTADLGNFQPSE---NEDGKFRFFDKQQ
OK193_E_018                                             MLRLITAAVLVSACLAYPQKRDGAPADTA-NLQGFGQPMP-------AMPN---MQG-----MQ-----MPV-MPMPG--MQNPFLP-LG-TGFKRDLDENLEKRKHHSKFNEGNR---GS-EADPE--SFMNFMKGNGDNFPFANMDSADTADLGNFQPSE---NEDGKFRFFDKQQ

CebrOK016_E_008                                         MLRLILAAVLVSACLAYPQRRDGAPAETA-NLQGFGQEMM------QSLPG---MQG-----MQP----LQG-MP-AG----MPFNNPFNGMGYKRAADENLEERREHAKFQA-DKSAFDS-ESSPE--DFMKFLEENGNTNPFED---A-SPDLGKFE-SDQNGQEENKFRFFNQQP
OK212_J_017                                             MLRLILAAVLVSACLAYPQRRDGAPAETA-NLQGFGQEMM------QSLPG---MQG-----MQP----LQG-MP-AG----MPFNNPFNGMGYKRAADENLEERREHAKFQA-DKSAFDS-ESSPE--DFMKFLEENGNTNPFED---A-SPDLGKFE-SDQNGQEENKFSFFNQQP
CebrOK033_J_012                                         MLRLILAAVLVSACLAYPQRRDGAPAETA-NLQGFGQGMM------QPLPG---MQE-----MQP----LQG-MP-AG----MPFNNPFNGMGYKRAADENLEERREHAKFQA-DKSAFDS-ESS-----------------------------------------------------
CebrOK035_J_021                                         MLRLILAAVLVSVCLAYPQRRDGAPAEAA-NLQGFAPGMM------QRLQP---MQE-----MQG----MQG-MA-PG----MPFGASVPGMGYKRAADENLEERRGHSNFQE-DKSPFGS-DSDPE--AFMKLFEDNGNTNPFADKDDA-SPDLGSFE-SDENGQEENKFRFFHQQP
CebrOK035_J_022                                         MLRLILAAVLVSVCLAYPQRRDGAPAEAA-NLQGFAPGMM------QAPQG---LQP-----MQP----MQE-MS-AS----LPFSANIPGMGYKRAADENLEERRGHSNFQE-DKSPFGS-DSDPE--AFMKLFEDNGNTNPFADKDDA-SPDLGSFE-SDENGQEENKFRFFHQQP
CebrOK035_J_023                                         ---------------------------AA-NLQGFATGMM------QA------PQG-----LQP----MQE-MP-AA----LPFGANFPNMGYKRAADENLEERRGHSNV---DKSAFDS-ESDPG--AFMKFLEDNGNKLPFEEMDGA-SPDLGNFEPSAENDHEENKFRFFDQQP

CebrOK035_J_024                                         -------------------------------------------------PN---MQG-----MQP----MAGNMA-PG--QMLPFNPNLA-MGFKRSL-DNLEKRRHHFKFNEDNKMPFDAPDADLEKFNFANFLKNDADELPFANMEGSDAADLGNFEPSNDH-AEEGQFRFYDQDQ
SRX1323887_E_018                                        MLRLVIAAVLVCACLAFPQRRDGAPAD---NLKSFDPAMM--QGMNAGMPN---MQG-----MQP----MAGNMA-PG--QMLPFNPNLA-MGFKRSL-DNLEKRRHHFKFNEDNKMPFDAPDADLEKFNFANFLKNDADELPFANMEGSDAADLGNFEPSNDH-AEEGQFRFYDQDQ

[Superfamily C (Contulakin-G)]  
[No Framework]
[                                                       /-----Signal-----------/---------------Pro----------------/ /------C----C-----/----Pos-]

OK213_E_020                                             MQTAYWVVMWMMMVWITAPLSEGGKLNDVIRGLVPDDLTLQRMFETPVSHRLSDG---R NLT-VYICTWKLCPPSPWRRPHGKR---
OK006_E_017                                             MQTAYWVVMGMMMVWITAPLSGGGKLNDVIRGLVPDDLTLQRMFKSLFSHRLSGG---R NST-VHICMWKVCPPPPWRRPHGKR---
OK193_E_019                                             MQTAYWVVMGMMMVWITAPLSGGGKLNDVIRGLVPDDLTLQRMFKSLFSHRLSGG---R NST-VHICMWKVCPPPPWRRPHGKR---
OK193_E_020                                             MQTAYWVVMGMMMVWITAPLSGGGKLNDVIRGLVPDDLTLQRMFKSLFSHRLSDG---R NLT-VYMCTWKICPPSPWRRPHGKR---
OK213_E_021                                             MQTAYWVVMWMMMVWITAPLSEGGKLNDVIRGLVPDDLTLQRMFKSLFSHRLSGG---T YSR-VDTCIWKVCPQSP-----------
OK005_J_015                                             MQTAYWVVMMMMMVWITAPLSEGGKLNDVIRGLVPDDLTLQRMFKSLFSHRLSGG---T YSR-VDTCIWKVCPQSP-----------
OK193_E_021                                             MQTAYWVVMGMMMVWITAPLSGGGKLNDVIRGLVPDDLTLQRMFKSLFSHRLSGG---T YSR-VDTCIWKVCPQSP-----------
OK212_J_018                                             MQTAYWVVMMMMMVWITAPLSEGGKLNDVSRGLVPDDRTLQGLFETPVSHRLSDG---R DSTGVDLCIWKVCPPTPWRRSYGKR---
OK214_J_012                                             MQTAYWVVMMMMMVWITAPLSEGGKLNDISRGLVPDDRTLQGLFETPVSHRLSDG---R ISTGVDLCIWKVCPPTPWRRSYGKR---
SRX1323887_E_019	                                    MQTVYWVVMGMMMVWITAPLSGGGKLNDVIRGLVPDDLTLQRMFETPVSHRLSGG---R NST-VHICMWKVCPPPPWRRPHGKR---	
CebrOK035_J_025	                                        MQTAYWVVMGMMMVWITAPLSGGGKLNDVIRGLVPDDLTLQRMFETPVSHRLSDG---R NST-VYICTWKLCPPSP-----------
CebrOK016_E_009	                                        MQTAYWVVMMMMMVWITAPLSEGGKLNDVIRGLVPDDLTLQRMFKSLFSHRLSGG---T YSR-VDTCIWKVCPQSP-----------
CebrOK035_J_026	                                        MQTAYW-MIVMMMVWITAPLSEGGKLNDVIRGLVPDDLTPQLILQSLDSRRHDHGIRPK R---VDICNWRICAPNPLRRHDLKKRNN
frigidusATO88031                                        MQTAYW-MIVMMMVWITAPLSEGGKLNDVIRGLVPDDLTPQLILQSLDSRRHDHGIZZR PKR-VDICNWRICAPNPLRRHDLKKRNN
ebraeusATO88029                                         MQTAYWVVMGMMMVWITAPLSGGGKLNDVIRGLVPDDLTLQRMFETPVSHRLSGG---R NST-VHICMWKVCPPPPWRRPHGKR---
lividusATO88028                                         MQTAYW-VMVMMMVWITAPLSEGGKLNDVIRGLVPDGLTPQLILQSLVSSHNP------ SPT-ATICIWKVCPPDPWRRHDLQKSNK


[Con-ikot-ikot-2]                 
[also a turritoxin]                 
[New Framework]                     
                                    
[                                                       /----------Signal-----/----Pro------/ /---CC------C-------------C-------C-------CC-----C---C---------C---C----C--]

OK212_J_019                                             MAMNMWMTISVCVVVVMATTVVGSTPSQEQGLSLDKR DDVGCCAWEVYDCLIQR---RSHFYICYSWASWICTRDLSDGCCPRLGGCIRRCVWGDR--DLCYYHCIVARC---
CebrOK033_J_013                                         MAMNMWMTISVCVVVVMATTVVGSTPSQEQGLSLDKR DDVGCCAWEVYDCLIQR---RSHFYICYSWASWICTRDLSDGCCPRLGGCIRRCVWGDR--DLCYYHCIVARC---
OK214_J_013                                             MAMNMWMTISVCVVVVMATTVVGSTPSQEQGLSLDKR GDVGCCAWEVYDCLIQR---RSHFYICYSWASWICTRDLSDGCCPRLGGCIRRCVWGDR--DLCYYHCIVARC---
CebrOK035_J_027                                         MAMNMWMTISVCVVVVMATTVVGSTPSQEQGLSLDKR GDVGCCAWEVYDCLIQR---RSHFYICYSWASWICTRDLSDGCCPRLGGCIRRCVWGDR--DLCYYHCIVARC---
OK005_J_016                                             MAMNMWMTISVCVVVVMATTVVGSTPSQEQGLSLDKR RNVGCCAWEVYDCLIQR---RSHFYICYSWASWICTRDLSDGCCPRLGGCIRRCVWGDR--DLCYYHCIVARC---
OK005_J_017                                             MAMNMWMTISVCVVVVMATTVVGSTPLQERGLSLDER RAIGCCAWQVYDCLVQR---GHYWYICYSWASWICTRDLSDGCCPRLGGCIRRCVWGDR--DLCYYHCIVARC---
OK193_E_022                                             MAMNMWMTISECVVVVMATTVVGSTPLQERGLSLDER RAIGCCAWQVYDCLVQR---GHYWYICYSWASWICTRGLSDRCCPGLERCIRRCVSGYK--IVCYYLCIFESC---
SRX1323887_E_020                                        MAMNMWMTISVCVVVVMATTVVGSTPLQERGLSLDER RAIGCCAWQVYDCLVQR---GHYWYICYSWASWICTRGLSDRCCPGLERCIRRCVSGYK--NVCYYHCIFESC---
CebrOK014_E_007                                         MAMNMWMTISVCVVVVMATTVVGSTPLQERGLSLDER RAIGCCAWQVYDCLVQR---GHYWYICYSWASWICTRGLSDRCCPGLERCIRRCVSGYK--NVCYYHCIFESC---
OK214_J_014                                             ------------------------------GLSLDER RAIGCCAWQVYDCLVQR---GHYWYICYSWASWICTRGLSDRCCPGLERCIRRCVSGYK--NVCYYHCIFESC---
OK213_E_022                                             MAMNMWMTISVCVVVVMATTVVGSTPLQERGLSLDER RAIGCCAWQVYDCLVQR---GHYWYICYSWASWICTRGLSDRCCPGLERCIRRCVSGYR--NVCYYHCIFESC---
CebrOK016_E_010                                         MAMNMWMTISVCVVVVMATTVVGSTPLQERGLSLDER RAIGCCAWQVYDCLVQR---GHYWYICYSWASWICTRGLSDRCCPGLERCIRRCVSGYR--NVCYYHCIFESC---
magusQFQ60982                                           MAMNMWMTISVCVVVVMATTVVGSTPLQERGLSLDER RAIGCCAWQVYDCLVQR---GHYWYICYSWASWICTRGLSDRCCPGLERCIRRCVSGYR--NVCYYHCIFERC---
OK213_E_023                                             --MNMWMTISECVVVVIATTVVGSTPLQERGLSLAER RAIGCCAWQVYDCLLQR---GHYLYICYSWASWICTR---------------------------------------
OK214_J_015                                             MAMNMWMTISVCVVVVMATTVVGSTPSQEQGLSLDKR GDVGCCAWEVYDCLIQR---RSHFYICYSWASWICTRGLSDRCCPGLERCIRRCVSGYK--NVCYYHCIFESC---
OK006_E_018                                             MAMNMWMTISVCVVVVMATTVVGSTPLQERGLSLDER RAIGCCAWQVYDCLVQR---GHYWYICYSWASWICTRGLSDRCCPGLERCIRRCVSGYK--NVCYYHCIFESC---
OK006_E_019                                             MAMNMWMTISGCVVDVMATTVVGSSLLQERGLSLDER RAIGCCAWQVYDCLVQQ---GHNWYICFSWASWVCTRRLSDRCCA-------------------------------
OK006_E_020                                             MAMNMSMTISVCVVVVMATTVVGSTPSQEQGLSLDKR GDVGCCAWEVYDCLIQR---RSHFYICYSWASWICTRDLSDGCCPRLGGCIRRCVWGDR--DLCYYHCIVARC---
OK213_E_024                                             ---------------------VGPTLLQERGLSLDAR RAIGCCAWLVYDCLVQR---VHYWYICYSWASWICTLGLSDRCCSGLERCIRRCVS--------------------
																							  
OK212_J_020                                             MAMNMWMTISVCVVVVMATTVVGSTPSQEQGLSLDKR DDVGCCAWAFYDCLMQG-ISRRRLNMCYIQAFTICARGLPGGCCPGLLGCFRRCAWSDS--DVCYYHCIFARCWV-
betulinusAMP44637                                       MAMNMWMTISVCVVVVMAATVVGSTPLQEQGLSLDER HNPGCCPWEFYDCLIQRMVWRSRLTICYNQASMICSRGRPGGCCPGLLHCFEECTSRDS--AVCYYRCKFAPC---
CebrOK035_J_028                                         -----------------------STPLQEQGLSLDER GTRGCCNWAFYGCLIKRIFPRDHFDLCYSMASRTCTRGRPGGCCIGLLLCFRRCTSSIS------TSAITTANW--
SRX1323887_E_021                                        MATSMWMTISVFVVVAMAATVVDSTPLQEQGLSRNDR DNPGCCRWDMYDCLYRQQNWRNSLNYCYNKGVRMCTSPRDVRCCNAFFHCLNQCPFGDH--AICYSGCKDVPCWLR
CebrOK035_J_029                                         --------ISAFVVVAMAATVVDSSPLQEQGLSRNDR DNPGCCRWDMYDCLYRQQNWSDSLNYCYNKGVRMCTSTRDVRCCNAFFHCLNQCPFGDH--AVCYSGCKDVPCWLR

[Con-ikot-ikot-4]  
[New Framework]
[                                                       /--------Signal-------/-------Pro-------/ /--CC------C-----C--------C---C-------C-------CC-----C---C--------------C---C-----C----]

OK214_J_016                                             MAMNVWMTISVFVVVVMATTVIGST---ASHEQKR-DRSSR K--CCATKAYQCLRNHKCFKKPIDYECGQPCKTTDTTSCRPTAGDDCCMIYKHCLVDCQLVSADREGDQLLYCYEVCSNSYPC-----
OK212_J_021                                             MAMNVWMTISVFVVVVMATTVIGST---ASHEQKR-DRSSR K--CCATKAYQCLRNHKCFKKPIDYECGQPCKTTDTTSCRPTAGDDCCMIYKHCLVDCQLVSADREGDQLLYCYEVCSNSYPC-----
OK005_J_018                                             MAMNVWMTISVFVVVVMATTVIGST---ASHEQKR-DRSSR K--CCATKAYQCLRNHKCFKKPIDYECGQPCKTTDTTSCRPTAGDDCCMIYKHCLVDCQLVSADREGDQLLYCYEVCSNSYPC-----
OK006_E_021                                             MAMNVWMTISVFVVVVMATTVIGST---VSHEQKR-DRSSR K--CCATKAYQCLRDHKCF-EPIDYKCGQPCKNTDTTSCRPTAGDNCCMIYKHCLVECQIFRSDRRGDQLLYCYELCSDS--CTYTG-
CebrOK033_J_014	                                        ----------------MATTVIGST---ASHEQKR-DRSSR K--CCATKAYQCLRNHKCF-KPIDYECGQPCKTTDTTSCGSTTGDNCCSIYKSCLVDCQIVRADREGDQLLFCYNICDDSYPC-----
CebrOK033_J_015	                                        MAMNVWMTISVFVVVVMATTVIGST---ASHEQKR-DRSSR K--CCATKAYQCLRNHKCFKKPIDYECGQPCKTTDTTSCRPTAGDDCCMIYKHCLVDCQLVSADREGDQLLYCYEVCSNSYPC-----
CebrOK035_J_030	                                        ----------------------GST---ASHEQKR-DRSSR K--CCATKAYQCLRNHKCFKKPIDYECGQPCKTTDTTSCRPTAGDDCCMIYKHCLVDCQLVSADREGDQLLYCYEVCSNSYPC-----
CebrOK033_J_016	                                        ------------------------------------DRSSR K--CCATKAYQCLRNHKCFKKPIDYECGQPCKTTDTTSCGSTTGDNCCSIYKSCLVDCQIVRADREGDQLLYCYEVCSNSYPC-----
OK193_E_023                                             MAMNVWMTISVFVVVVMATTVIGST---VSHEQKR-DRSSR K--CCATKAYQCLRDHKCF-EPIDYKCGQPCKNTDTTSCRPTAGDNCCMIYKHCLVDCQIFRSDRRGDQLLYCYELCSDSYPC-----
OK006_E_022                                             MAMNVWMTISVFVVVVMATTVIGST---VSHEQKR-DRSSR K--CCATKAYQCLRDHKCF-EPIDYKCGQPCKNTDTTSCRPTAGDNCCMIYKHCLVECQIFRSDRRGDQLLYCYELCSDSYPC-----
SRX1323887_E_022	                                    MAMNVWMTISVFVVVVMATTVIGST---VSHEQKR-DRSSR K--CCATKAYQCLRDHKCF-EPIDYKCGQPCKNTDTTSCRPTAGDNCCMIYKHCLVECQIFRSDRRGDQLLYCYELCSDSYPC-----
OK213_E_025                                             MAMNVWMTISVFVVVVMATTVIGST---VSHEQKR-DRSSR K--CCATKAYQCLRDHKCF-EPIDYKCGQPCKNTDTTSCRPTAGDNCCMIYKHCLVECQIFRSDRRGDQLLYCYELCSDSYPC-----
SRX1323887_E_023	                                    MAMNVWMTISVLVVVVMATAVTGST---PSQEQERSSVDRT KKSCCAMKTYECLRDRDCLISQDSD-CATPCKNIDTSGCDSADGNDCCASYMDCVVDCQIDTGSDVEDPLAVCYNSCNSAHSC-----
CebrOK016_E_011	                                        ----------------------------PSQEQERSSVDRT KKSCCAMKTYECLRDRDCLISQDSD-CATPCKNIDTSGCDSADGNDCCASYMDCVVDCQIDTGSDVEDPLAVCYNSCNSAHSC-----
betulinusAMP44683                                       MAMNVWMTTSVFLVAVMATIVLGST---PLQEQKRNDRSSR K--CCAVKSYLCLQGHGCL-TPSDSSCAEQCKTTDTSTCGSNAGDNCCSTYKSCLVDCQISRGNQHGDPLLICYNHCSQQHPC-----

OK214_J_017                                             MAMNVWMTISVFVVVVMATTVIALECPPPSHGQNR-DRSSR K--CCAVKSYQCLRDRGCF-NPVNSKCAEPCKTTDTTSCGSTTGDNCCSIYKSCLVECQIAHGDQREDQLLCCYNICDQSYPC-----
CebrOK033_J_017	                                        MAMNVWMTISVFVVVVMATTVIALECPPPSHGQNS-DRSSR K--CCAVKSYQCLRDRGCF-NPVNSKCAEPCKTTDTTSCGSTTGDNCCSIYKSCLVECQIAHGDQREDQLLCCYNICDQSYPC-----
CebrOK035_J_031	                                        MAMNVWMTISVFVVVVMATTVIALECPPPSHGQNR-DRSSR K--CCAVKSYQCLRDRGCF-NPVNSKCAEPCKTTDTTSCGSTTGDNCCSIYKSCLVECQIAHGDQREDQLLCCYNICDQSYPC-----
OK212_J_022                                             MAMNVWMTISVFVVVVMATTVIALECPPPSHGQNR-DRSSR K--CCAVKSYQCLRDRGCF-NPVNSKCAEPCKTTDTTSCGSTTGDNCCSIYKSCLVECQIAHGDQREDQLLCCYNICDQSYPC-----
OK214_J_018                                             MAMNVWMTISVFVVVVMATTVIALECPPPSHGQNR-DRSSR K--CCAVKSYQCLRDRGCF-NPVNSKCAEPCKTTDTTSCGSTTGDNCCSIYKSCLVECQIAHGDQREDQLLCCYNICDQS--CTYTG-


[Con-ikot-ikot-5]  
[Formerly Cerm Superfamily 14 in Abalde et al. 2018 GBE 10 2643–2662]
[Also a turritoxin]
[Framework IX]
[                                                       /----------Signal-----/-Pro/ /------C-------C----C------C---C--------C----------------------------------------]

OK214_J_019                                             MNMRMTTIVFVLVATAATLVGSSPVEER --YPSFLCHMRAIIECVTSGCLHPLTECIKNCMEK-AVARCRGVP-------------ALSSGVALRSNAVGRLA-------
CebrOK033_J_018                                         MNMRMTTIVFVLVATAATFVGSSPVEER --YPSFLCRMRAIIECVTSGCLHPLTECIKNCMEK-AVARCRGVP-------------ALSSGVALRSNAVGRLA-------
OK212_J_023                                             MNMRMTTIVFVLVATAATFVGSSPVEER --YPPFLCRIRAIIECVRSGCLHPLTECIKNCMEE-AVARCRGVP-------------ALSSGVALRSNAVGRLA-------
OK005_J_019                                             MNMRMTTLVFVLVATAATFVGSSPVEER --YPSFLCSIRAIIECVRSGCLLPLTECIKNCMEK-AIDRCRGVP-------------ALSSGVALRSNAVGRLA-------

ermineusAXL95434                                        MNMRMTIIVFVVVATAATVVGSTPLEER GSWPTS-CCIRKTIECVRYKCLLTPLLCTPFCYSKGATARCGGDPDEGCCPAFFGCYISCLRGVAGKPFACYKTCRDVDCEL

[Con-ikot-ikot-6]  
[New Framework]
[                                                       /-------Signal--------/------Pro-----/ /-----CC-----C---C--------C---C-------C--------C-----C---C--------C---C-------C-------CC-----C---C--------C--------C]

OK212_J_024                                             --MNMRMMLTVLIVVVFTRMALCST---EDGRLARQRR GDTSAECCLTLLGCYNTCMLDHISSDCWEHCKSENTIQCSLDFSLYYCNSFQSCYQICIRTKHESHCFRGCKYEAMGDCLETGVVECCPGFMMCYNNC-EHSHAY-CMTHCTKGSC
litteratusP08432                                        --MNMRMMLTVLIVVVFTRMALCST---EDGRLARQRR GDTSAECCLTLLGCYNTCMLDHISSDCWEHCKSENTIQCSLDFSLYYCNSFQSCYQICIRTKHESHCFRGCKYEAMGDCLETGVVECCPGFMMCYNNC-EHSHAY-CMTHCTKGSC
tribbleiJAI17976                                        MAMNMWMTLSVLVVVVFTTTVVCSTSLDEDKREALQLR WDTASLCCLSIYGCYWECKTKG-GDNCWLWCAQENYDVCNGMYG-DYCWPFANCFKECIKTKSKEHCFNGCTYEAKLKCIEEGYVACCPKFMTCYNECLENTGQYSCSNQCEGVGC


[Conkunitzin-3]  
[Framework IX]
[                                                       /--------Signal---/--Pro---/ /---C--------C---------------C-------C------------C---C---------]
                                                                                        /-------------------KU--motif-----------------------/

OK006_E_023                                             MEGRGLAVVLILASCMSALTVGDK--RS LPAVCLQPVVVGPCAASVQRYYFNHHSDICQPFVYGGCNGNGNRFITMAACVNTCKSPSVAIVVD
OK214_J_020                                             MEGRGLAVVLILASCMSALTVGDK--RS LPAVCLQPVVVGPCAASVQRYYFNHHSDICQPFVYGGCNGNGNRFITMAACVNTCKSPSVAIVVD
OK005_J_020                                             MEGRGLAVVLILASCLSALTVGDK--RS LPAVCLQPVVVGPCAASVQRYYFNHHSDICQPFVYGGCNGNGNRFITMAACVNTCKSPSVAIVVD
OK213_E_026                                             MEGRGLAVVLILASCLSALTVGDK--RS LPAVCLQPVVVGPCAASVQRYYFNHHSDICQPFVYGGCNGNGNRFITMAACVNTCKSPSVAIVVD
OK212_J_025                                             MEGRGLAVVLILASCLSALSVGDK--RS LPAVCLQPVVVGPCAASLQRYYFNHHYDICQPFVYGGCNGNGNRFITMAACVNTCKSPSVAIVVD
OK212_J_026                                             MEGRGLAVVLILASCLSALTVGDK--RS LPAVCLQPVVVGPCAASLQRYYFNHHFDICQPFVYGGCNGNGNRFITMAACVNTCKSPSVAIVVD
OK193_E_024                                             MEGRGLAVVLILTSCLCALTVGDK--RS VPDVCLQPMVVGSCRGKFTRYYFNSCLGMCQPFDYGGCDGNGNRFKTMDACLNKCEIPWERIQGD
SRX1323887_E_024	                                    MEGRGLAVVLILTSCLSALTVGDK--RS VPDVCLQPMVVGSCRGKFTRYYFNSCLGMCQPFDYGGCDGNGNRFKTMDACLNKCEIPWERIQGD
OK006_E_024	                                            -------VVLILTSCLSALTVGDK--RS VPDVCLQPMVVGSCRGKFTRYYFNSCLGMCQPFDYGGCDGNGNRFKTMDACLNKCEIPWERIQGD
CebrOK033_J_019	                                        MEGRGLAVVLILASCLSALTVGDK--RS LPAVCLQPVVVGPCAASVQRYYFNHHLDICQPFVYGGCNGNGNRFITMAACVNTCKSPSVAIVVD
loroisiiAMB57284                                        MEGRRLAVVLIVTSCLSALTVGDT--RS IPDVCLQPVVVGPCRGKFPHYYFNSVLGTCQLFDYGGCRGNENRFKKMDACLKTCEYPWRGILGY
betulinusAMP44641                                       MEGRRLAVVLIVTSCLSALTVGDT--RS VPDVCFQPVVVGPCRGKFPHYYFNSILATCQLFDYGGCRGNENRFEKMDACLYTCEYPWRGILGY
magusDAC80554                                           MEGRRLAVVLIVTSCLPALTVGES--EP TPDVCLQPKVVGPCKAKFRSYYYDSDLDTCQMFIYGGCGGNGNRFLTKDACLNTCIYPLTGNQGY


[Conkunitzin-5]                       
(Kunitz family of serine protease inhibitors)
[Framework VIII]                    
                                    
[                                                       /-------Signal---------/P//C---C-----C---------------C----C--------C---------------C-------C------------C---C-/-]
                                                                                                                  /----------------------KU motif-------------------/
									                    
OK006_E_025                                             MATFNIVLAALFASVILVDFAVQARR CHPPCEYGERCVSANRRERRHRHNNVCVPVRCLFQARRGRCLNFDRRYHFNTLTMSCTRVHTGACYGRNNRFSSSENCELTCAPRR
OK193_E_025                                             MATFNIVLAALFASVILVDFAVQARR CHPPCEYGERCVSANRRERRHRHNNVCVPVRCLFQARRGRCLNFDRRYHFNTLTMSCTRVHTGACYGRNNRFSSSENCELTCAPRR
OK213_E_027                                             MATFNIVLAALFASVILVDFAVQARR CHPPCEYGERCVSANRRERRHRHNNVCVPVRCLFQARRGRCLNFDRRYHFNTLTMSCTRVHTGACYGRNNRFSSSENCELTCAPRR
ermineusAXL95582                                        MATFNIVLAALFASVILVDFAVQARR CHPPCEYGERCVSANRRERRHRHNNVCVPVRCLFQARRGRCLNFDRRYHFNTLTMSCTRVHTGACYGRNNRFSSSENCELTCAPRR

[Conkunitzin-6]                        
[Framework IX]                      
                                    
[                                                       /--------Signal-------/--Pro-/ /--C---------C----------------C----C--C------------C---C----------------------]
                                                                                                          /-------------KU motif---------------/

OK214_J_021                                             MKARHVTIVLMLL-VTCMMESSARRGKSER ---CYHDN----ACGDPENTRYYYDSSTNTCKQFQCLGCGGNRNMFKNVEDCVQVCVRPVDMIIYSRNSNEKRHPVSLD
magusQFQ60991                                           MKERHFTSVLILLAITCMMETSSQRKKPDK ---CHERVDLGLDCGKSAETRYYYNNNTGTCESFDYLGCEANRNNFINEAYCKFTCVQ--------------------T

[Conkunitzin-7]                         
(Kunitz family of serine protease inhibitors)

[                                                       /--------Signal------/ /---------C--------C---------------------C-------C------------C---C-----/]
                                                                                       /-----------------------KU--motif-------------------------/

OK005_J_021                                             MEGRRFPAVLILTICMLELGAG ASIFNSVPSECGQPSEMGPC------FAYFPRFYFDMASYDCQMFIYGGCFGNSNNFRTLYECYDTCWPRELR
OK214_J_022                                             MEGRRFPAVLILTICMLELGAG ASIFNSVPSECGQPSEMGPC------FAYFPRFYFDMASYDCQMFIYGGCFGNSNNFRTLYECYDTCWPRELR
OK212_J_027                                             MEGRRFPAVLILTICMLELGAG ASIFNSVPSECGQPSEMGPC------FAYFPRFYFDMASYDCQMFIYGGCFGNSNNFRTLYECYDTCWPRELR
CebrOK035_J_032                                         MEGRRFAAVLILTICMLELGAG ASIFNSVPSECGQPSEMGPC------FAYFPRFYFDMASYDCQMFIYGGCFGNSNNFRTLYECYDTCWPRELR
CebrOK033_J_020                                         -------------ICMLELGAG ASIFNSVPSECGQPSEMGPC------FAYFPRFYFDMASNDCQMFIYGGCFGNSNNFRTLYECYDTCWPRELR
SRX1323887_E_025                                        MEGHRFAAVLILTICMLELGAG IPQ-----SQCIQPPYTGPC------EKYTARYFFDKASHDCKMFIYGGCKGNGNNFRTYKECYGRCGPE---
CebrOK014_E_008                                         MEGRRFAAVLILTICMLELGAG IPQ-----SQCIQPPYTGPC------KKYTARYFFDKASHDCKMFIYGGCKGNSNNFRTYKECYESCGPK---
OK006_E_026                                             MEGRRFAAVLILTICMLELGAG IPQ-----SQCIQPPYTGPC------EKYTARYFFDKASHDCKMFI---------------------------
CebrOK033_J_021                                         MEGRRFAAVLILTICMLELGAG IPL-----SQCILPPYTGPC------EKYTARYFFDNASYDCKMFIYGGCKGNGNNFRT--------------
OK214_J_023                                             --GRRFAAVLILTICMLELGAG IPL-----SQCILPPYTGPC------EKYTARYFFDNASYDCKMFIYGGCKGNGNNFRTYKECYESCGPK---
OK214_J_024                                             -------------------GAG ASRGRGVPTVCRLPAVKGPC------KAYTTRYYFDRDSYDCKTFLYGGCLGNANNFPTYRKCYGRCGPE---
magusQFQ60992                                           MEGCRFAAVLILTICMLAPGTG TLIPRGRPSECNLRKDSGSCTRSEQSTKSEQRYYFSTYYNECRMFTYSGCGGNRNNFIHMYDCRRKCVYT-VG
magusDAC80557                                           MEGRRFAAVLILTLCMLASGAV AARPKGRLSECNLRKDSGSCTRSEQSTKSEQRYYFSTYYNECRMFTYRGCGGNRNNFIHMYDCRRKCVYT-AG

[Conkunitzin-8]    
[Framework IX]
[                                                       /-------Signal-------/---------Pro--------/ /------C--------C---------------C-------C------------C---C/]
                                                                                                           /-------------------KU--motif----------------------/
																								    
OK214_J_025                                             MPSCHARPQFTLPLVLFQELSSDKDTHLQSAHRKTDTLPDASR VEGLPSLCSLPKVVGPCRALIPRFYFNSTQLECLPFAYGGCDGNDNNFETYSDCQASCR
OK213_E_028	                                            -----ARPQFTLPLVLFQELSSDKDTHQQSAHRKTDTLPDASR VEGLPSVCSLPKVVGPCRALIPRFYFNSTQLECLPFAYGGCDGNDNNFETYSDCQASCR
OK006_E_027	                                            ------------------------------------------- -EGLPSLCSLPKVVGPCRALIPRFYFNSTQLECLPFAYGGCDGNDNNFETYSDCQASCR
OK212_J_028	                                            ------------------------------------------- --GLPSLCSLPKVVGPCRALIPRFYFNSTQLECLPFAYGGCDGNDNNFETYSDCQASCR
magusQFQ60993                                           MPSCHARPQFTLPLVLFQELSSDKDTHQQSAHRKTDTLPDTSR VEGLPSLCSLPKVVGPCRALIPRFYFDSTQLECLPFSYGGCDGNDNNFETYSECQASCR
betulinusAMP44698                                       MPSCHARPQFTLPLVLFQELSSDEDTRQQSAHRKTDSLPDTSR VEGLPSLCSLPKVVGPCRALIPRFYFNSTQLECLPFAYGGCHGNDNNFETYSECQASCR


[Conkunitzin-9]    
[New Framework]
[                                                       /-------Signal----/-Pro-//C----------C----------------C-------C------------C--CC-----C----]
                                                                                  /----------------------KU--motif----------------------/
																				  
OK213_E_029                                             MDARRVVAVLLVLSMARSVPRKDPR CYEPFDLGDSTCRT-LRIRFYYNQENKKCQTFQYTGCGGNGNNFPDLYACKECCEWDMTCY----
OK212_J_029                                             MDARRVVAVLLVLSMARSVTGKDPW CYEPLDLGDSRCPTLLSTRFYYNQEKEKCQTFLYTGCGGNSNNFPNLYACKECCEWDMTCYA---
OK214_J_026                                             MDARRVVAVLLVLSMARSVTGKDPW CYEPLDLGDSRCPTLLSTRFYYNQEKEKCQTFLYTGCGGNSNNFPNLYACKECCEWDMTCYA---
betulinusAMP44685                                       MDVRRVPAVLLVLSMARSVTAIDAR CNEPLNLGNTGCDE-VRIRWYYNQGNVACQTFQYTGCGGNRNNFYNRDDCKKCCRWDMECVSAGR
																				  
OK006_E_028                                             MDARRVVAVLLVLSMARSVTGKDPR CYEPLDSGDSRGPT-QSTRFYYNQEKKKCQTFQCTECGGNGNNFPDLYACKECCEWDMTCY----
OK193_E_026                                             MDARRVVAVLLVLSMARSVTGKDPR CYEPLDSGDSRGPT-QSTRFYYNQEKKKCQTFQCTECGGNGNNFPDLYACKECCEWDMTCY----
OK213_E_030                                             MDARRVVAVLLVLSMARSVPRKDPR CYEPLDSGDSRGPT-QSTRFYYNQEKKKCQTFQCTECGGNGNNFPDLYACKECCEWDMTCY----
SRX1323887_E_026	                                    MDARRVVAVLLVLSMARSVTGKDPR CYEPLDSGDSRGPT-QSTRFYYNQEKKKCQTFQCTECGGNGNNFPDLYACKECCEWDMTCY----


[Conkunitzin-10]
(Kunitz family of serine protease inhibitors)
[Framework XXII]

[                                                       /--------------------------C------C------------C--------C---------------C-------C------------C---C-----------------------------/----Post-----]
                                                                                                      /--------------------KU--motif---------------------/
SRX1323887_E_027	                                    MKERWRMFISKSNETENCGIHLMEKDLCRGEIMDCRKAIMLKDFNAICQLEADVGPCSGTFPRWFYNSGMRKCQLFDYGGCRGNDNRFDTEEECMDLCNLDKESMMERRSRIEKEVVMEKQAMMEKQRQMEKQAMMEKQRQM
OK214_J_027	                                            MKERWRMFISKSNETENCGIHLMEKDLCRGEIMDCRKAIMLKDFNAICQLEADVGPCSGTFPRWFYNSGMRKCQLFDYGGCRGNDNRFDTEEEC------------------------------------------------
OK212_J_030                                             -----------------------------------------------------DGPCRGNFPRWFYNSSMQKCQVFSYGGCRGNDNRFDTEEECMELCNLDKESMMERRSRIEKEVVMEKQAMMEKQRQMEKQA--------
DAC80558magus		                                    MKERWRMFISKSNETENCGIHLMEKDLCRVEIMDCRKAIMLKDFNAICQMEADVGPCSGTFPRWFYNSGMKKCQLFDYGGCRGNDNRFDTEEECMELCNLDKESMMERRSRIEKEVVMEKQAMMEKQRQMEKQAMMEKQRQM

[Conkunitzin-11]  
{Framework IX]
[                                                       /-----Signal--------/P/ C--------C---------------C-------C------------C---C--P]
                                                                                /--------------------KU--motif-----------------------/
OK214_J_028                                             MGNMWVVLVCLLGLCLFANADDR CTLQPSSGTCPGYFPRWFYDSASGQCQRFIYSGCKGNANNYLSEEECHQACVSR
OK213_E_031                                             MGNMWVVLVCLLGLCLFANADDR CTLQPSSGTCPGYFPRWFYNSASGQCQRFIYSGCKGNANNYLSEEECHQACVSR
OK214_J_029                                             ---MWVVLGCLLGLCLCANADDR CTLPPVTGVCMAYMPRWHYDSTSGQCQQFVWGGCGGNANNFLSKDECVQACGNH
OK212_J_031	                                            --------------------DDR CTLPPVTGVCMAYMPRWHYDSTSGQCQQFVWGGCGGNANNFLSKDECVQACGNH
OK213_E_032	                                            ---------------LCANADDR CTLPPVTGVCMAYFPRWHYDSTSGQCQQFVWGGCGGNANNFLSKDECVQACGDH
V_1258_156                                              ---MWVVLICLLGLCLSANADDR CTMPPVTGVCMAYFPRWYYDSTSGQCKQFVWGGCGGNANNFLSKEECFQACGNH

[Conkunitzin-12]  
[Framework VIII] 
[                                                       /---------------CC-----------------------C--------C------------------------C----------------------C---C-C------------------------C--------------------C---C---]
                                                                                                         /----------------------KU--motif----------------------//----------------------KU--motif------------------/
OK212_J_032                                             -------------------------MDALRFSAVLLILAMACFMTVSAGACEKPKVEGTGSQSITSYFFNSASGTCDMFVYKGGNDETFPNRFNSHPVCENVCKCKLRMDPGTGERLRTRYYHNTDGSGCLPFQYRGTGGNANNFLSESACEMECEL--
OK213_E_033                                             MTPSTSVLHLSFITPYCCSLHPERNMDALRFSAVLLILAMACFITVSAGACEKPKVEGTGSQSISSYFFNSASGTCDTFVYKGGNDDPFPNRFNSHPVCENVCKCKLRMDPGTGERLRTRYYHNTDGSRCLPFQYRGTGGNANNFLSESACEMECEL--
OK193_E_027                                             -------------------------MDALRFSAVLLILAMACFITVSAGACEKPKVEGTGSQSISSYFFNSASGTCDTFVYKGGNDDPFPNRFNSHPVCENVCKCKLRMDPGTGERLRTRYYHNTDGSRCLPFQYRGTGGNANNFLSESACEMECEL--
OK006_E_029                                             -------------------------MDALRFSAVLLILAMACFITVSAGACEKPKVEGTGSQSISSYFFNSASGTCDTFVYKGGNDDPFPNRFNSHPVCENVCKCKLRMDPGTGERLRTRYYHNTDGSRCLPFQYRGTGGNANNFLSESACEMECEL--
SRX1323887_E_028	                                    -------------------------MDALRFSAVLLILAMACFITVSAGACEKPKVEGTGSQSISSYFFNSASGTCDTFVYKGGNDDPFPNRFNSHPVCENVCKCKLRMDPGTGERLRTRYYHNTDGSRCLPFQYRGTGGNANNFLSESACEMECEL--
CebrOK035_J_033	                                        -------------------------MDALRFSAVLLILTMACFMTVSAGACEKAKNEGTGNAHLTRYFFNNATSTCQTFIYKGGDYETFPNRFTSHGECENVCKCRLRKDVGTGTQPRDRYFHNTDGSGCQSVRYLGTGGNMNNFPSEAECE-------
CebrOK016_E_012	                                        -------------------------MDALRFSAFLLILAMACFITVSAGACEKPKVEGTGSQSISSYFFNSASGTCDTFVYKGGNDDPFPNRFNSHPVCENVCKCKLRMDPGTGERLRTRYYHNTDGSRCLPFQYRGTGGNANNFLSESACEMECEL--
betulinusAMP44684                                       -------------------------MDALRFSAVLLILAMACFMTESTGVCDKDKVEGTGNLNLTRYFFDSDTETCETFIYRGGNSDTFPNRFNYHSVCENTCQCKLRKDTGHGEAPRTRWYHSSDGSGCQSFQYLGSGGNANNFHTESECEMACEL--


[Superfamily D-1]
[Framework XX] 
[                                                       /--------Signal---------------/----------Pro--------/ /C-----------CC----C----CC----C-C---------C-C---]
										                
OK213_E_034                                             ----MPRLEMMLLVLLILPLPYFNAAGGQAVPGDGQGDGLDSDLLRGDRAVQR ACYTSQPGSEWGKCCLTKMCGDK-CCHTIHCRCVSGDFKGQGCSC----
SRX1323887_E_029	                                    ----MPRLEMMLLVLLILPLPYFNTAGGQAVPGDGQGDGLDSYLLRGDRAVQR ACYTSQPGSEWGKCCLTKMCGDK-CCRTIHCRCVFGDFNGQGCSC----

OK212_J_033                                             ----MPRLEMILLVLLILPLPYFNAAGGQAVPGDGQGDGVDRYLLRGDRAVHR ACYTSQPGSEWGQCCLTKMCGGM-CCPQMHCSCVFDGVKGHGCSC----
OK214_J_030                                             ----MPRLEMILLVLLILPLPYFDAAGGQAVPGDGQGDGLDSYLLRGDRAVHR ACYTSQPGSEWGQCCLTKMCGDM-CCPRMHCSCVFDGVKGHGCSC----
OK005_J_022                                             ----MPRLERILLVLLILPLPYFNAAGGQAVPGDGQGDELDRDLLRGDRAVHR ACYTSQPGSEWGQCCLTKMCGDM-CCPQWHCSCVFDGVKGHGCSC----
OK213_E_035                                             ----MPRLEMMLLVLLILPLPYFNAAGGQAVPGDGQGDGLDSDLLRGDRAVYR ACYYHQPNSPWGRCCPTKMCGSK-CCDRANCRCVSHADRGQGCSC----
OK193_E_028                                             ----MPRLEMMLLVLLILPLPYFNAAGGQAVPGDGQGDGLDSYLLRGDRAVYR ACYYHQPNSPWGRCCPTKMCGSK-CCDRANCRCVSHADRGQGCSC----
OK006_E_030                                             ----MPRLEMMLLVLLILPLPYFNAAGGQAVPGDGQGDGLDSYLLRGDRAVYR ACYYHQPYSPWGRCCPTKMCGSM-CCDRANCRCVSHADRGQGCSC----
SRX1323887_E_030	                                    ----MPRLEMMLLVLLILPLPYFNTAGGQAVPGDGQGDGLDSYLLRGDRAVYR ACYYHQPYSPWGRCCPTKMCGSK-CCDRANCRCVSHADRGQGCSC----
OK005_J_023                                             ----MPRLERILLVLLILPLPYFNAAGGQAVPGDGQGDELDRDLLRGDRAVYT ACYYHQPYSPWGRCCPTKMCGSK-CCERANCLCISHTDMGQGCSC----
OK214_J_031                                             ----MPRLEMILLVLLILPQPYFNAASEQAVPGDGQGDELDRDLLRGDRAVYT ACYYHQPYSPWGRCCPTKMCGSK-CCERANCLCISHTDMGQGCSC----
OK212_J_034                                             ----MPRLEMILLVLLILPLPYFNAAGGQAVPGDGQGDGVDRYLLRGDRAVYT ACYYHQPYSPWGRCCPTKMCGSK-CCERANCLCISHTDMGQGCSC----
CebrOK033_J_022	                                        ----MPRLEMILLVLLILPLPYFNAAGEQAVPGDGQGDELDRDLLRGDRAVYT ACYYHQPYSPWGRCCP---------------------------------
OK212_J_035	                                            ----MPRLEMMLLVLLILPLPYFNA-GGQAVPGDGQGDGLDSYLLRGDRAVYT ACYYHQPYSPW--------------------------------------
OK005_J_024	                                            ------------LVLLILPQPYFNAAGEQAVPGDGQGDELDRDLLRGDRAVYT ACYYHQPYSPWGRCCPTKMCGSK-CCERANCLCISHTDMGQGCSC----
CebrOK035_J_034	                                        ----MPRLEMILLVLLILPLPYFNAAGEQAVPGDGQGDELDRDLLRGDRAVYT ACYYHQPYSPWGRCCPTKMCGSK-CCERANCLCISHTDMGQGCSC----
CebrOK033_J_023	                                        ----MPRLEMILLVLLILPLPYFNAAGGQAVPGDGQGDGLDSYLLRGDRAVYT ACYYHQPYSPWGRCCPTKMCGSK-CCERANCLCISHTDMGQGCSC----
CebrOK033_J_024	                                        ----MPRLEMILLVLLILPLPYFNAAGGQAVPGDGQGDGLDSYLLRGDRAVHR ACYTSQPGSEWGQCCLTKMCGDM-CCPQWHCSCVFDGVKGHGCSC----
OK006_E_031	                                            ----MPRLEMMLLVLLILPLPYFNAAGGQAVPGDGQGDGLDSYLLRGDRAVHR ACYTSQP------------------------------------------
CebrOK035_J_035	                                        ----MPRLERILLVLLILPLPYFNAAGGQAVPGDGQGDGLDSYLLRGDRAVHR ACYTSQPGSEWGQCCLTKMCGDM-CCPQWHCSCVFDGVKGHGCSC----
CebrOK014_E_009	                                        ----MPRLEMMLLVLLILPLPYFNTAGGQAVPGDGQGDGLDSYLLRGDRAVYR ACYYHQPNSPWGRCCPTK-------------------------------
CapitaneusP0CE26                                        ----MPKLEMMLVVLLIFPLFYFDAAGGQAVQGDRRGDGLARYLQRGDRNDES ECIISTPGSSWGRCCLTRMCGTM-CCPRSGCYCVYHWRRGHGCACSD--
mustelinusP0CE28                                        ----MLKLEMMLVVLLILPLFYFD-AGGQVVQGDWRSDGLARYLQRGDR-DVR ECNINTPGSSWGKCCLTRMCGTM-CCARSGCTCVYHWRRGHGCSCPG--
vexillumP0C1W5                                          ----MPKLEMMLLVLLIFPLSYFIAAGGQVVQVDRRGDGLAGYLQRGDR-DVQ DCQVSTPGSKWGRCCLNRVCGPM-CCPASHCYCVYHRGRGHGCSC----

[Superfamily D-2]  
[Framework XXVIII] 
[                                                       /--------Signal---------/ /----------------------------C-----------C-----C----CC----C-C---------C-C--C]
									
									
OK006_E_032                                             ----MRKVEMMILVMLILPLCYIDA VGPPP-PWNMEDEII-------EHWQKLHCHEISDLTPWILCSPEPLCGGKGCCAQEVCDC-----SGPACTCPPCL
OK193_E_029                                             ----MPKLEMMLLVLLILPLCYIDA VGPPP-PWNMEDEII-------EHWQKLHCHEISDLTPWILCSPEPLCGGKGCCAQEVCDC-----SGPACTCPPCL
litteratusF6JWU7                                        ----MPKLEMMLLVLLILPLCYIDA VGPPP-PWNMEDEII-------EHWQKLHCHEISDLTPWILCSPEPLCGGKGCCAQEVCDC-----SGPACTCPPCL
magusQFQ60995                                           ----MPKLEMMLLVLLILPLCYIDA VGPPP-PWNMEDEII-------EHWQKLHCHEISDLTPWILCSPEPLCGGKGCCAQEVCDC-----SGPACTCPPCL   

[Superfamily D-3]  
[Framework XV] 
[                                                       /--------Signal---------------/--------------Pro-------------/ /-----C----C----CC----C-C---------C-C--]
										                
OK005_J_025                                             MTATMPKLEVMLLVLLILPLPHF-SAGGQAMQGNGH---------RMDQSFRRSVRMSQQRR SWGTN-CDTVICRMK-CCSSQSCTC-----KGNDCDCS--
OK212_J_036                                             MTATMPKLEVMLLVLLILPLPHF-SAGGQAMQGNGH---------RMDQSFRRSVRMSQQRR SWGTN-CDTVICRMK-CCSSQSCTC-----KGNDCDCS--
OK214_J_032                                             MTATMPKLEVMLLVLLILPLPHF-SAGGQAMQGNGH---------RMDQFFRRSVRMSQQRR SWGTN-CDTVICGMK-CCSSRSCTC-----KGNDCDCS--
CebrOK033_J_025	                                        MTATMPKLEVMLLVVLILPLPHF-SAGGQAMQGNGH---------RMDQSFRRSVRMSQQRR SWGTN-CDTVICGMK-CCSSRSCTC-----KGNECDCS--
CebrOK035_J_036	                                        MTATMPKLEVMLLVLLILPLPHF-SAGGQAMQGNGH---------RMDQSFRRSVRMSQQRR SWGTN-CDTVICGMK-CCSSRSCTC-----KGNECDCS--
OK214_J_033                                             MTATMPKLEVMLLVLLILPLPHF-SAGGQAMQGNGH---------RMDQFFRRSVRMSQQRR AWGPN-CEFVRCGTM-CCLSQSCTC-----DDLKCNCS--
OK212_J_037                                             MTATMPKLEVMLLVLLILPLPHF-SAGGQAMQGNGH---------RMDQSFRRSVRMSQQRR AWGPN-CEFVRCGTM-CCLSQSCTC-----DDLKCNCS--
OK005_J_026                                             MTATMPKLEVMLLVLLILPLPHF-SAGGQAMQGNGH---------RMDQSFRRSVRMSQQRR AWGPN-CEFVRCGTM-CCLSQSCTC-----DDLKCNCS--
CebrOK033_J_026	                                        MTATMPKLEVMLLVVLILPLPHF-SAGGQAMQGNGH---------RMDQSFRRSVRMSQQRR AWGPN-CEFVRCGTM-CCLSQSCTC-----DDLKCNCS--
OK005_J_027                                             MTATMPKLEVMLLVLLILPLPHF-SAGGQAMQGNGH---------RMDQSFRRSVRMSQQRR AWGA--CDTKICGTM-CCPSQSSTC-----DGISCDSN--
CebrOK035_J_037	                                        MTATMPKLEVMLLVLLILPLPHF-SAGGQAMQGNGH---------RMDQSFRRSVRMSQQRR AWGA--CDTKICGTM-CCHSQSCTC-----DGLSCDCS--
CV8_031                                                 MTATMLKLEVMLLVLLVLPLPHI-NAGGQAMLGNGH-------GHGMYQSFLRSARKSQQRR SWNTPPCNTRFCSGI-CCAHKSCTC-----KRYGCDCQ--

[Divergent_MKLCVVIVLL superfamily]
[Framework XIV] 
[                                                       /----------Signal----/-------Pro------/ /--C---C-----C----C--------/]

SRX1323887_E_031	                                    MKLCVVIVLLMLAMPFNGGEASRFFNQHARSQRSGMKTR GIWCDPPCPEGETCRGGECSDEFNGDMGR
californicusADB28953                                    MKLCVVIVLLMLAMPFNGGEASRFFNQHARSQRSGMKTR GIWCDPPCPEGETCRGGECSDEFNGDMGR

[Divergent_MRFYIGLMAA superfamily]
[Framework V] 
[                                                       /----------Signal----/-----------------Pro-----------------/ /---CC------CC/]

SRX1323887_E_032                                        MRFYIGLMAALMLTSVLRTDSASVGQTGTKSELAVIERVIRQRDAADVKPVARTNEGPGR DPAPCCQHPIETCCRR
californicusADB43126                                    MRFYIGLMAALMLTSVLRTDSASVGQTGTKSELAVIERVIRQRDAADVKPVARQNEGPGR DPAPCCQHPIETCCRR

[Superfamily E-1]  
[Framework XXII] 
[                                                       /-----Signal-------/-Pro-/ /C---------C-----C------------C---C-C-----C-----------------C--]
								     
OK212_J_038                                             -MTRVFLAMFFLLALTE-GWPRLYDR DCERGRNMHYTCTQLEQCG-VIRKMNGQLTCELRCRCTPGKSCLHGENIDWDNMNTKIYHCPWP
OK214_J_034                                             -MTRVFLAMFFLLALTE-GWPRLYDR DCERGRNMHYTCTQLEQCG-VIRKMNGQLTCELRCRCTPGKSCLHGENIDWDNMNTKIYHCPWP
OK006_E_033                                             -MTRVFLAMFFLLALTE-GWPRLYDR DCERGRNMHYTCTQLEQCG-VIRKMNGQLTCELRCSCTPGKSCLHGENIDWDNMNTKIYHCPWP
OK213_E_036                                             -MTRVFLAMFFLLALTE-GWPRLYDR DCERGRNMHYTCTQLEQCG-VIRKMNGQLTCELRCSCTPGKSCLHGENIDWDNMNTKIYHCPWP
OK005_J_028                                             -MTRVFLAMFFLLALTE-GWPRLYDR DCERGRNMHYTCTQLEQCG-VIRKMNGQLTCELRCSCTPGKSCLHGENIDWDNMNTKIYHCPWP
CebrOK033_J_027	                                        -MTRVFLAMFFLLALTE-GWPRLYDR DCERGRNMHYTCTQLEQCG-VIRKMNGQLTCELRCRCTPGKSCLHGENIDWDNMNTKIYHCPWP
CebrOK035_J_038	                                        -MTRVFLAMFFLLALTE-GWPRLYDR DCERGRNMHYTCTQLEQCG-VIRKMNGQLTCELRCRCTPGKSCLHGENIDWDNMNTKIYHCPWP
OK193_E_030                                             -MTRVFIAMFFLLALTE-GWPRLYDR DCERGRNMHYRCKQLEQCG-IIRKKDGKLTCELRCSCKPGKSCLHGENIDWDDMTTKIYHCPWP
SRX1323887_E_033                                        MMMRVFIAMFFLLALVEAGWPRLYDK NCK-KNILRTYCSNKI-CGEATKNTNGELQCTMYCRCANG--CFRGQYIDWPNQQTNLLFC---
OK193_E_031	                                            -----------------------------K-KNILRTYCSNKI-CGEATKNTNGELQCTMYCRCANG--CFRGQYIDWPNQQTNLLFC---
ermineusAXL95533                                        MMTRVFIAMFFLLALTE-GWPRLTDS DCELGRNMHITCKQLDQCG-VIEKKDGQLTCKLRCKCKPGKRCLRKENIDWSDITTRIYHCPWP


[Superfamily E-2]  
[Framework XXII] 
[                                                       /-----Signal-----/ /-------C---------C-----C-----------C---C-C-----C-----------------C----]
								     

OK212_J_039                                             --------MFFLMALTEG WPRLYVRDCVRGRNMHITCFKDQTCGLTVKRNGRLNCSLTCSCRRGESCLHGEYIDWDSRGLKVHICPKPWF
OK213_E_037                                             MMTRVFFAMFFLMALTEG WPRLYDSDCVRGRNMHITCFKDQTCGLTVKRNGRLNCSLTCSCRRGESCLHGEYIDWDSRGLKVHICPKPWF
OK193_E_032                                             MMTRVFFAMFFLMALTEG WPRLYDRDCARGRNMHITCFKDQTCGLTVKRNGRLNCSLTCSCRRGESCLHGEYIDWDSRGLKVHICPKPWF
OK005_J_029                                             MMTRVFFAMFFLMALTEG WPRLTDSDCERGRNMHITCFKDQTCGLTVKRNGRLNCSLTCSCRRGESCLHGEYIDWDSRGLKVHICPKPWF
OK005_J_030                                             MMTRVFFAMFFLMALTEG WPRLTDSDCERGRNMHITCFKDQSCGLIVKRNGRLSCSLNCKCRRNESCLPSEEVDWDHRDMKIVICPKPWF
SRX1323887_E_034	                                    MMTRVFFAMFFLMALTEG WPRLYDSDCVRGRNMHITCFKDQTCGLTVKRNGRLNCSLTCSCRRGESCLHGEYIDWDSRGLKVHICPKPWF
OK213_E_038                                             MMTRVFFAMFFLMALTEG WPRLYDSDCVRGRNMHITCFKDQSCGLIVKRNGRLSCSLNCKCRRNESCLPSEEVDWDHRDMKIVICPKPWF
OK214_J_035	                                            -----------------G WPRLYDRDCVRGRNMHITCFKDQTCGLTVKRNGRLNCSLTCSCRRGESCLHGEYIDWDSRGLKVHICPKPWF
OK005_J_031	                                            -----------------G WPRLYDSDCVRGRNMHITCFKDQTCGLTVKRNGRLNCSLTCSCRRGESCLHGEYIDWDSRGLKVHICPKPWF
marmoreusP0DM16                                         MMTRVFFAMFFLMALTEG WPRLYDSDCVRGRNMHITCFKDQTCGLTVKRNGRLNCSLTCSCRRGESCLHGEYIDWDSRGLKVHICPKPWF
																			 	  


[Superfamily F-1]
[No Framework]
[                                                       /--------Signal-------/-------Pro-------/ /---C----------------------------------C-----------------------]
																			  
CebrOK033_J_028                                         MQRGAVLLGVVAFLALWSQAAADVYDLMDPDVLAMIDVGKK MMHACSIANKHIDDPWWMLDVLDFKEKSVYYTMMSDLVTCLNHFFRIR-----------FEE-P
CebrOK035_J_039                                         MQRGAVLLGVVAFLALWSQAAADVYDLMDPDVLAMIDVGKK MMHACSIANKHIDDPWWMLDVLDFKEKSVYYTMMSDLVTCLNHFFRIR-----------FEE-P
OK005_J_032                                             MQRGAVLLGVVAFLALWSQAAADVYDLMDPDVLAMIDVGKK MMHACSIANKHIDDPWWMLDVLDFKEKSVYYTMMSDLVTCLNHFFRIR-----------FEE-P
OK214_J_036                                             MQRGAVLLGVVAFLALWSQAAADVYDLMDPDVLAMIDVGKK MMHACSIANKHIDDPWWMLDVLDFKEKSVYYTMMSDLVTCLNHFFRIR-----------FEE-P
OK212_J_040                                             MQRGAVLLGVVAFLALWSQAAADVYDLMDPDVLAMIDVGKK MMHACSIANKHIDDPWWMLDVLDFKEKSVYYTMMSDLVTCLNHFFRIR-----------FEE-P
OK213_E_039                                             -----------------SQAAADVYDLMDPDVLAMIDVGKK MMHACSIANKHIDDPWWMLDVLDFKEKSVYYTMMSDLVTCLNHF--------------------
OK006_E_034                                             MQRGAMLLGVVAFLALWSQAAADVYDLMDPDVLAMIDVGKK MMHACSIANKHIDDPWWMLDVLDFKEKSVYYTMMSDLVTCLNHFSRIR-----------FEE-P
OK006_E_035                                             MQRGAMLLGVVAFLALWSQAAADVYDLMDPDVLAMIDVGKK MMHACSIANKHIDDPWWMLDVLDFKEKSVYYTMMSDLVTCLNHFSRRR-----------HEE-H

[No Framework]
[                                                       /---------Signal------/ /----------------------C----------------------------------C-----/-------Pro-------]


CebrOK014_E_010                                         -MQRGAVLLGVVAFLALWSQAAA EEYDLNDPDVLAIVDEGQKLMHACSIANKYTYDPWWKLNILAFKEMRVYHSMMSDMVTCLNHFFRRR-----------HEE-H
CebrOK016_E_013                                         -MQRGAVLLGVVAFLALWSQAAA EEYDLNDPDVLAIVDEGQKLMHACSIANKYTYDPWWKLNILAFKEMRVYHSMMSDMVTCLNHFFRRR-----------HEE-H
SRX1323887_E_035                                        -MQRGAVLLGVVAFLALWSQAAA EEYDLNDPDVLAIVDEGQKLMHACSIANKYTYDPWWKLNILAFKEMRVYHSMMSDMVTCLNHFFRRR-----------HEE-H
OK006_E_036                                             -MQRGAMLLGVVAFLALWSQAAA EEYDLNDPDVLAIVDEGQKLMHACSIANKYTYDPWWKLNILAFKEMRVYHSMMSDMVTCLNHFSRRR-----------HEE-H
OK214_J_037                                             -MQRGAVLLGVVAFLALWSQAAA EEYDLNDPDVLAIVDEGQKLMHACSIANKYTYDPWWKLNILAFKEMRVYHSMMSDMVTCLNHFSRRR-----------HEE-H
OK213_E_040                                             -MQRGAVLLGVVAFLALWSQAAA EEYDLNDPDVLAIVDEGQKLMHACSIANKYTYDPWWKLNILAFKEMRVYHSMMSDMVTCLNHFSRRR-----------HEE-H
OK005_J_033                                             -MQRGAVLLGVVAFLALWSQAAA EEYDLNDPDVLAIVDEGQKLMHACSIANKYTYDPWWKLNILAFKEMRVYHSMMSDMVTCLNHFSRRR-----------HEE-H
CebrOK014_E_011                                         -MQRGAVLLGVVAFLALWSQAAA EEYDLNDPDVLAIVDEGQKLMHACSIANKYTYDPWWKLNILAFKEMRVYHSMMSDMVTCLNHFSRRR-----------HEE-P
SRX1323887_E_036                                        -MQRGAVLLGVVAFLALWSQAAA EEYDLNDPDVLAIVDEGQKLMHACSIANKYTYDPWWKLNILAFKEMRVYHSMMSDMVTCLNHFSRRR-----------HEE-P
OK193_E_033                                             -MQRGAMLLGVVAFLALWSQAAA EEYDLNDPDVLAIVDEGQKLMHACSIANKYTYDPWWKLNILAFKEMRVYHSMMSDMVTCLNHFFRRR-----------HGE-H
OK193_E_034                                             -MQRGAMLLGVVAFLALWSQAAA DVYDLNDPDVLAVVDEGQKLMHACSIANKYTYDPWWKLNILAFKEMRVYHSMMSDMVTCLNHFFRRR-----------HGE-H
OK212_J_041                                             ----------------LWSQAAA DVYDLNDPDVLAMVDEGQKLMHACSIANKYTYDPWWKLNILAFKEMRVYHSMMSDMVTCLNHFFRRR-----------HEE-H
OK193_E_035                                             ------------VFLALWSQSAA EEYDLNDPDVLDIVDEGQKLMHACSISNKYTYDPWWKLNILAFKEMRVYHSMMSDMVTCLNHFSRRR-----------HEE-H
OK213_E_041                                             -MQRGAVLLGVVAFLALWSQAAA EEYDLNDPDVLAIVDEGQKLMHACSIANKYTYDPWWKLNILAFKEMRVYHSMMSDMVTCLNHFFRRR----------------
OK006_E_037                                             -MHRGAMLLGVVVFLALWSQAAA EEYDLNDPDVLAIVDEGQKLMHACSIANKYTYNPWWKLNILAFKE--------------------------------------
OK006_E_038                                             -MQRGAVLLGVVAFLALWSQAAA EEYDFNDPDVLAIDDEGQKLMHACSIANKYTYDPWWKLNILAFKEMRVYHSMMSDMVTCLIHFLRRR-----------YEE-H
OK006_E_039                                             -MQRGAMLLWVVAFLALWSQAAA DVYDLNDPDVLAMVDEGQKLMHACSIANKYTYDPWWKLNILAFKEMRVYHSMMNDMVTCLNHFSR------------------
OK006_E_040                                             -MQRGAVLLGVVAFLALWSQAAA EENDLNDPDVLAIVDEGQKMMHACSIANKYTSDPWWKLNILAFKKMRVYPSMMGDM---------------------------
OK213_E_042                                             -------------FLSLWSQAAA EEYDLNDPEVVAMVDEGQKLKHACSIANKYTYGPWWKLNILAFNEMRVYHSMMSDMVTCLNHFFRRR-----------LEE-H
OK193_E_036                                             ----------------------- -------------IDEEQKMMHACSIANKYTYDPWCKLNILAFKKMRVYHSMMSDMVTCLNHFPRRR-----------HE---
OK193_E_037                                             --------------PTLWSQAAA EEYDLNDPDVLAIVDEGQKLMHACSVASKYTYDPWGKLNILDFKEMRVYHSMMSDMVTCLNHFFPEKTWR------------T
magusQFQ60998                                           -MQRGAVLLGVVAFLALWSQAAA DVYDLNDPDVLAVVDEGQKLMHACSIANKYTYDPWWKLNILAFKEMRVYHSMMGDMVTCLNHFFRRR-----------HGE-H
magusQFQ61008                                           -MQRGAVLLGVVAFLALWPQAAA EKYDLHDSDVWAVVAYSQSLMNACATANDYMDNPWSLMNIADFKERSTYYSMYTEMVTCLNYFLQRR---------------L
magusQFQ61005                                           MMQRGAVLLGVVAFLALWPQAAA KVYNLHDTEVWAVVAYSKRVMHACAIANSHMDDPWLVVDVKDFEERSLFHSMYKAMVSCLEDFFQQR---------------P

[Superfamily F-2]
[No Framework]
[                                                       /--------Signal-------/-------Pro-------/ /---C----------------------------------C-----------------------]
																			   
OK214_J_038                                             --------------------------LNEPDVWGMVDYAQR AMHSCAIVNDYDDRRWSSYNVAEFKDRSLFRTMVTDLQGCLNYFFQIR---------------P
OK006_E_041                                             MQRGAVLLGVVAFLALWPQAAARVYDLNEPDVWGMVDYAQR AMHSCAIVNDYDDRKWSSYNAMEFKDRSLFRTMVTDLQGCLNYFFQIR---------------P
OK006_E_042                                             MQRGAVLLGVVAFLALWPQAAARVYDLNEPDVWGMVDYAQR AMHSCAIVNDYDDRKWSSYNAMEFKDRSLFRTMVSDLDGCLIYFFDIR---------------P
magusQFQ61006                                           MQRGAVLLGVVAFLALWPQAAARVYDLNEPDVWGMVDYAQR AMHSCAIVNDYDDRKWSSYNAMEFKDRSLFRTMVSDLDGCLIYFFDIR---------------P
OK214_J_039                                             ---------VVAFLALWPQAAARVYDLNEPNVWDMVNFAQR LMDSCAIVNDYDDRKWSSYNAMEFKDRSLFRTMVSDLDGCLIYFFDIR---------------P
OK006_E_043                                             MQRGAVLLGVVAFLALWPQAAARVYDLNEPNVWDMVNFAQR LMDSCAIVNDYDDRKWSSYNAMEFKDRSLFRTMVSDLDGCLIYFFDIR---------------P
CebrOK035_J_040                                         -----------------------------------IIYGRK LMHACALANNYIDDPWHMMSVGDFEDKGRYYAMLRELVPCLSTFLRTR-----------YEL-P
OK005_J_034                                             ----------VAFLVLWPQAGAELYDVNDPDVRAMVIDGQK LMDTCATANRYIDDRWSTYSIEYFKDKGLYHRMLRE----------------------------
OK212_J_042                                             MQRGAVLLGVVAFLALWPQAAARVYDLNEPNVWDMVNFAQR LMDSCAIVNDYDDRRWSSYNVAEFKDRSLFRTMVSDLDGCLIYFFDIR---------------P
OK214_J_040                                             ------LLGVVAFLALWPQAAARVYDLYEPDVWTMVDYAQI VMHFCAIVNDYDDRRWSSYNVAEFKDRSLFQAMVTDLRGCLNHFFQIR---------------P
OK212_J_043                                             MQRGAVLLGVVAFLALWPQAAARVYDLYEPDVWTMVDYAQI VMHFCAIVNDYDDRRWSSYNVAEFKDRSLFQAMVTDLRGCLNHFFQIR---------------P
OK006_E_044                                             MQRGAVLLGVVAFLALWPQAAARVYDLYEPDVWTMVDYAQI VMHFCAIVNDYDDRKWSSYNAMEFKDRSLFQAMVTDLRGCLNHFFQIR---------------P
OK214_J_041                                             -----------AFLALWPQAAAKVYDLNEPNVWSVVDDTQR LMHSCALANRYGSNVWSTYNVGAFKERRLYHSMEIDLVRCLNYFLETR---------------Q
OK006_E_045                                             ----------------------------------------R LMHSCALANRYGSNVWSTYNVGAFKERRLYHSMEIDLVRCLNYFLETR---------------Q
																			   
OK006_E_046                                             MQRGAVLLGVVAFLGLLPQAAAKVYNLHETEVWAVVAYSKR VMHACAIANSHMDNPWAVVDVKDFEERSLYH---------------------------------
OK006_E_047                                             MQRGAVLLGVVAFLGLLPQAAAKVYNLHETEVWAVVAYSKR VMHACALANGHMDNPWSVVDVKDFEERSLFHSMYKAMVHCLQDFFQQR---------------P
OK006_E_048                                             MQRGAVLLGVVAFLGLLPQAAAKVYNLHETEVWAVVAYSKR VMHACAIANSHMDDPWLVVDVKDFEERSLFHSMYKAMVSCLEDFFQQR---------------P
OK006_E_049                                             MQRGAVLLGVVAFLGLLPQAAAKVYNLHETEVWAVVAYSKR VMHACAIANSHIDDPWSVVDVKDFEERSLFHSMYEAMVFCLEDFFQRR---------------P
OK214_J_042                                             ---------VVAFLALWPQAAAKVYNLHETEVWAVVAYSKR VMHACAIANSHMDDPWLVVDVKDFEERSLFHSLYKAMVSCLEDFFQQR---------------P
OK214_J_043                                             ---------VVAFLALWPQAAAKVYNLHETEVWAVVAYSKR VMHACAIANSHIDDPWSVVDVKDFEERSLFHSLYKAMVSCLEDFFQQR---------------P
OK214_J_044                                             ---------VVAFLALWPQAAAKVYNLHETEVWAVVAYSKR VMHACALANGHMDNPWSVVDVKDFEERSLFHSLYKAMVHCLQDFFQQR---------------P
OK214_J_045                                             ---------VVAFLALWPQAAAKVYNLHETEVWAVVAYSKR VMHACAIANSHMDNPWSLVDVKDFEERSLFHSLYKAMVHCLQDFFQQR---------------P
OK214_J_046                                             ---------VVAFLALWPQAAAKVYNLHETEVWAVVAYSKR VMHACAIANSHMDNPWSLVDVKDFEERSLFHSLYKAMVSCLEDFFQQR---------------P
OK006_E_050                                             ----------------------------------------R VMHACALANGHMDNPWSVVDVKDFEERSLYHSLYKAMVSCLEDFFQQR---------------P
magusQFQ61009                                           MQRGAVLLGVVAFLALWPQAAAKVYDLHETEVWAVVAYSKR LMNACALANSHMDNPWSVVDVKDFEERSLFHSMYKAMVSCLEDFFQQR---------------P
OK212_J_044                                             MQRGAVLLGVVAFLALWPQVAAKVYDLYETEVWAVVAYTQR LMNACATANDYMDDPWSVVDVGDFEERSLYNSLYKAMVSCLEDFFQQR---------------P
OK212_J_045                                             MQRGAVLLGVVAFLALWPQVAAKVYDLYDTKVWAVVSYSKE LMNACAIANDYMDDPWSVVDVGDFEERSLYNSLYKAMVSCLEDFFQQR---------------P
OK212_J_046                                             MQRGAVLLGVVAFLALWPQVAAKVYDLYDTKVWAVVSYSKG LMNACATANDYMDDPWSVVDVGDFEERSLYNSLYKAMVSCLEDFFQQR---------------P
OK006_E_051                                             MQRGAVLLGVVAFLGLLPQAAAKVYNLHETEVWAVVAYTQR VMHACATANDYMDNPWSLMHVADFEERGLYHGMYTAMVTCLEDFFQQR---------------P
OK214_J_047                                             -------LGVVAFLALWPQAAAEKYDLHDSDVWAVVAYSQS LMNACATANSYMDNPWSLMHVADFEERGLYHGMYTAMVTCLEDFFQQR---------------P
OK006_E_052                                             -----------------------------------VAYSQS LMNACATANSYMDNPWSLMNIADFKERSTYYSMYTEMVTCLNYFLQRR---------------L
OK214_J_048                                             -------LGVVAFLALWPQAAAEKYDLHDSDVWAVVAYSQS LMNACATANSYMDNPWSLMNIADFKERSTYYSMYTEMVTCLNYFLQRR---------------L
OK212_J_047                                             MQRGAVLLGVVAFLALWPQVAAKVYDLYETEVWAVVAYTQR LMNACATANSYMDNPWSLMNIADFKERSTYYSMYTEMVTCLNYFLQRR---------------L


[Superfamily H-1a]  
[Framework VI/VII]
[                                                       /-------Signal--------/-----------Pro-----------/ /----C----C---CC--------C----C----------]
								    
								    

OK213_E_043                                             MNSAGRLLLLCLALGLVFESLGIPVADDVKADRDTDPGDKDARGFYHGR T-QDDCGGTQCYIACCETIDGEEKCKELECDAISQTEPVRN
OK005_J_035                                             MNTAGRLLLLCLALGLVFESLGIPVADDVKADRDTDPGDKDARGFYHGR T-QVDCGGASCDFDCCETIDGEEKCSELNCGSISDTEPAR-
CebrOK035_J_041                                         MNTAGRLLLLCLALGLVFESLGIPVADDVKADRDTDPGDKDARGFYHGR T-QVDCGGASCDFDCCETIDGEEKCSELNCGSISDTEPAR-
OK006_E_053                                             MNSAGRLLLLCLALGVLFESLGIPVADDVKADRDTDPGDKDARGFYHGR T-QVDCGGASCDFDCCETIDGEEKCSELNCGSISDTEPAR-
OK212_J_048                                             MNSAGRLLLLCLALGLVFESLGIPVADDVKA----DPGDKDARGFNHWR T-QVDCGGASCDFDCCETIDGEEKCRELNCGPISDTEPAG-
OK214_J_049                                             MNTAGRLLLLCLALGLVFESLGIPVADDVKA----DPGDKDARGFNHWR T-QVDCGGASCDFDCCETIDGEEKCRELNCGPISDTEPAG-
CebrOK033_J_029                                         MNTAGRLLLLCLALGLVFESLGIPVADDLKA----DPGDKDARGFNHWR T-QVDCGGASCDFDCCETIDGEEKCRELNCGPISDTEPAG-
OK212_J_049                                             MNSAGRLLLLCLALGLVFESLGIPVADDVKADRDTDPGDKDARGFNHWR T-QVDCGGASCDFDCCETIDGEEKCRELNCGPISDTEPAG-
CebrOK033_J_030                                         MNTAGQLLLLCLALSLVFESLGIPVADDLKADRDTDPGDKDARGFNHWR T-QVDCGGASCDFDCCETIDGEEKCRELNCGSISDTEPAR-
OK006_E_054                                             MNSAGRLLLLCLALGVLFESLGIPVADDVKADRDTDPGDKDARGFYYWR A-QVDCGGTLCEFGCCKPINGEDECRELDCD----------
SRX1323887_E_037                                        MNSAGRLLLLCLALGVLFESLGIPVADDVKADRDTDPGDKDARGFYYWR A-QVDCGGTLCEFGCCKPINGEDECRELDCD----------
OK193_E_038                                             MNSAGRLLLLCLALGLVFESLGIPVADDVKADRDTDPGDKDARGFYYWR A-QVDCGGTLCEFGCCKPINGEDECRELDCD----------
OK213_E_044                                             MNSAGRLLLLCLALGLVFESLGIPVADDVKADRDTDPGDKDARGFYYWR A-QVDCGGTLCEFGCCKPINGEDECRELDCD----------
CebrOK033_J_031                                         MNTAGRLLLLCLALGLVFESLGIPVADDLKADRDTDPGDKDARGFNHWR A-QVDCSGTRCEFGCCEPINGEHKCRELDCDTISDTEPLR-
CebrOK035_J_042                                         MNTAGRLLLLCLALGLVFESLGIPVADDVKADRDTDPGDKDARGFYHGR A-QVDCSGTRCEFGCCEPINGEHKCRELDCDTISDTEPLR-
OK005_J_036                                             MNTAGRLLLLCLALGLVFESLGIPVADDVKADRDTDPGDKDARGFYHGR A-QVDCSGTRCEFGCCEPINGEHKCRELDCDTISDTEPLR-
OK214_J_050                                             MNTAGRLLLLCLALGLVFESLGIPVADDVKA----DPGDKDARGFYHGR A-QVDCSGTRCEFGCCEPINGEHKCRELDCDTISDTEPLR-
OK193_E_039                                             -----------------FESLGIPVADDVEADRDTDPDDGDPRGRNSWR S--TDCNGVPCQFGCCVTINGNDECRELDC-----------
OK005_J_037                                             MNTAGRLLLLCLALGLVFESLGIPVADDVEADRDTDPDDGDPRGRNSWR S--TDCNGVPCQFGCCVTINGNDECRELDC-----------
SRX1323887_E_038                                        ----------------------IPVADDVEADRDTDPDDGDPRGRNSWR S--TDCNGVPCQFGCCVTINGNDECRELDC-----------
OK213_E_045                                             ---------LCLALGLVFESLGIPVADDVETHRDADPDDGDPRGRNSWR S--TDCNGVPCQFGCCVTINGNDECRELDC-----------
CebrOK014_E_012                                         MNTAGRLLLLCLALGLVFESLGIPVADDLEADRDTDPDDKDPSVHNYWR T--TDCGGVPCQFGCCR----EDRCRELDCR----------
CebrOK016_E_014                                         MNTAGRLLLLCLALGLVFESLGIPVADDLEADRDTDPDDKDPSVHNYWR T--TDCGGVPCQFGCCR----EDRCRELDCR----------
CebrOK033_J_032                                         MNTAGRLLLLCLALGLVFESLGIPVADDLEADRDTDPDDKDPSVHNYWR T--TDCGGVPCQFGCCR----EDRCRELDCR----------
CebrOK033_J_033                                         MNTAGQLLLLCLALSLVFESLGIPVADDLEADRDTDPDDKDPSVHNYWR T--TDCGGVPCQFGCCR----EDRCRELDCR----------
CebrOK014_E_013                                         MNTAGRLLLLCLALGLVFESLGIPVADDLEADRDTDPDDKDPSVHNSWR T--TDCGGVPCEFGCCR----EDRCRELDCR----------
OK193_E_040                                             -------------LGLVFELLGIPVADDVEADRDADPDNGDPRGRISWR I-EEDCGYVPCQFGCCRIIDGKEKCREIDCY----------
CebrOK035_J_043                                         MNTAGRLLLLCLALGLVFESLGIFVADDVKADRDTDRDDGNPRRRNSMR H---TCDGEPCAFGCCETVNGERKCKHFGCP----------
CebrOK033_J_034                                         ----------CLYLMLVFVSYGIPVADDVEADRDTDPDEKDPSVHNSLQ DVYGNCGGERCRFGCCKTVNGKRTCKHLGCH----------
betulinusAMP44605                                       MNTAGRLLLLCLALGLVFESLGIPVADDVEADRDTDPDDEDPRGLSYWR T-LVDCGGVQCEFGCCETINGQERCREINCH----------
ermineusAXL95444                                        MNTAGRLLLLCLALGLVFESLGIPVADDVEADRDTDPDEEDPRALEPVE TGQATCGSGTCRFGCCRTIDGKQKCRELDCD----------

[Superfamily H-2a]  
[No Signal, no Framework]


OK005_J_038                                             MRTSGKLLLLCLAVGLLLESQAHPIADAGDANRDVGSDRTSVELSKMLEGWQ---AEKGQRKASARDE-EGGFYIFDPNRRS--F-Y
OK005_J_039                                             MRTSGKLLLLCLAVGLLLESQ---IADAGDANRDVGSDRTSVELSKMLEGWQ---AEKGQRKASARDE-EGGFYIFDPNRRS--F-Y
CebrOK016_E_015                                         -------------VGLLLESQAHPNADAGDASRDVGSDRTSVELSKMLKGWQ---AEKGQRKASARDE-EGGFYIFDPNRRS--F-Y
OK213_E_046                                             MRTSGKLLLLCLAVGLLLESQ---NADAGDATRDVGSDRTSVELSKMLKRWQ---AEKGQRKASARDE-EGGFYIFDPNRRS--F-Y
victoriaeW4VSG7                                         MRTSGRLLLLCLAVGLLLESQAHPNADAGDATRDVGSDRTSVELSKMLKGWQ---AEKGQRKASAPKK----FYVYPPVRRS--F-Y
CebrOK014_E_014                                         MRTSGRLLLLCLAVGLLLESQAHPNADAGDASRDVGSDRTSVELSKMLKRWQ---AEKRQRKASARGNESESFYIFERNRGS--F-Y
CebrOK016_E_016                                         MRTRGRLLLLCLAVGLLLESQAHPNADVGDATRDVGSDGTSVELSKMLKRWQ---AEKRQRKASARG--------------------
CebrOK033_J_035                                         MRTSGRLLLLCLAVGLLLESQAHPNADVGDATRDVGSDGTSVELSKMLKRWQ---AEKRQRKASARGNESESFYIFERNRGS--F-Y
OK005_J_040                                             MRTSGKLLLLCLAVGLLLESQAHPIADAGDANRDVGSDRTSVELSKMLEGWQ---AEKGQRKATARKP----VYVYPPGGRS--F-Y

CebrOK035_J_044                                         MRTSGRLLLLCLAVGLLLESQAQPNADAGDAIRDMGSDGTSKKLSKMLKKWQDSSADRGERKATARGD--DPFYIFPDVQRDGQF-H
OK213_E_047                                             MRTNGRLLFLCLAVGLLLESQAHPIADAGDATRNVGSDGTSVELSKMIERGQVSSAEKGLEKASAHGR--DIVYIVYKPDHDVPFPN
OK193_E_041                                             MRTNGRLLFLCLAVGLLLESQAHPIADAGDATRNVGSDGTSVELSKTIERGQVSSAEKGLEKASAHGR--DIVYIVYKPDHDVPFPN
OK214_J_051                                             MRTNGRLLFLFLAVGLLLESQAHPIADAGDATRNVGSDGTSVELSKMIERGQVSSAERGQEKASAHGR--NIVYIVYTPDHDVPFPF
CebrOK033_J_036                                         MRTNGRLLFLFLAVGLLLESQAHPIADAGDATRNVGSDGTSVELSKMIERGQVSSAEKGQNKASAHDR--DIVYIVYKPDHDVPFPF
CebrOK033_J_037                                         MRTNGRLLFLCLAVGLLLESQAHPIANDGDATRNVGSDGISVELPKMIERGQVSSAEKGQNKASAHDR--DIVYIVYKPDHDVPFPF
OK214_J_052                                             MRTNGRLLFLCLAVGLLLESQAHPIANDGDATRNVGSDGISVELPKMIERGQDSLAEKGQEKASAHGR--DIVYVFYTPDHDIPFPH
OK213_E_048                                             -------LFLCLAVGLLLESQAHPIANDGDATRNVGSDGISVELPKMIERGQDSSAEKGQEKASAHGR--DMVYVFYTPDHDIPFPH
OK193_E_042                                             -------LFLCLAVGLLLESQAHPIANDGDATRNVGSDGISVELPKMIERGQDS----GQEKASAHGR--GIVYVLYAPDHDIPFPH
OK213_E_049                                             -------LFLCLAVGLLLESQAHPIANDGDATRNVGSDGISVELPKMIERGQDS----GQEKTSAHGR--GIVYVYYAPDHDIPFPH
ermineusAXL95571                                        MRTSGRLLFLCLAVGLLLESQAHPIADAGDATRNVGSDGTSVELSKMIERGQDSSAEKGQRQAGARGH--VSVYVTLKPDYDIPFPA
CebrOK035_J_045                                         MRTNGRLLFLFLAVGLLLESQAHPIADDGDATRNVGSDGISVELSKMIERQQDSSAENGQETDSGIAL-------------------
CebrOK035_J_046                                         MRTNSRLLFLCLAVGLLMESQAHPIADDGDATRNVGSDGISVELSKMIERQQDSSAENGQETDSGIAL-------------------
CebrOK035_J_047                                         MRSSSRLLFLCLAGGLLLESQAHPLADDGDATRNVASDGNSVELSEILERGQDSLAEKGQEKASANGR--HIVYVFATPDYDAPLPH
SRX1323887_E_039                                        MRTSGRLLLLCLAVGLLLESQAHPIGDDGDSTRNVGSDGTSVEQSKILKRGQDSSAKKAQKKATAYGY--YYYEPFPTNGGIPDF--

[Superfamily H-2b]  
[No Framework]
[                                                       /-------Signal--------/--------------Pro-----------------/ /---C------C]

OK213_E_050	                                            MRTSSQLLFLCVSMGLVFALLGHPIADVRDAAGGADSEERSMQGSQTVEEKEASSSER GVLNCDSPSGEC
OK006_E_055                                             MRTSSQLLFLCVSMGLVFALLGHPIADVRDAAGGADSEERSMQGSQTVEGKEASSSER GVLNCDSPSGEC
OK193_E_043	                                            MRTSSQLLFLCVSMGLVFALLGHPIADVRDAAGGADSEERSMQGSQTVEGKEASSSER GVLNCDSPSGEC
OK214_J_053	                                            MRTSSQLLFLCVSMGLVFALLGHPIADVRDAAGGADSEERSMEGFQTDKGKEASSSER GVLNCESPSGEC
OK005_J_041	                                            MRTSSQLLFLCVSMGLVFALLGHPIADVRDAAGGADSEERSMEGSQTVEGKEASSSER GVLNCESPSGEC
SRX1323887_E_040                                        MRTSSQLLFLCVSMGLVFALLGHPIADVRDAAGGADSEERSMQGSQTVEGKEASSSER GVLNCDSPSGEC
CebrOK035_J_048	                                        MRTSSQLLFLCVSMGLVFALLGHPIADVRDAAGGADSEERSMEGFQTDKGKEASSSER GVLNCESPSGEC
V_1302_122                                              MRTSSQLLFLCVSMGLVLALLGHPIADVRDAAGGADSEGRSMEGSQTIEGKEASSSDR RALNCETPTGEC
A_0025_352                                              MRTSSQLLFLCVSMGLVLALLGHPIADVRDA----DSEERSMEGSQTIEGKEASSSDR RALNCGSPSGAC


[Superfamily I1-1]  
[Framework XIII] 
[                                                       /----Signal-------/--------Pro-----------/ /C---C------C-----CC----C------------C--C-----]


OK006_E_056                                             MKLALTFLLILMILPLMTGMKKSGDHERRSVKSMRDVFRDHR DCSSDCV---PHCPNRNECCDGDVCTYNSSLEKWF--CIGCGSGGGE
OK005_J_042                                             MKLALTFLLILMILPLMTGMKKSGDHERRSVKSMRDVFRDHR DCSSDCV---PHCPNRNECCDGDVCTYNSSLEKWF--CIGCGSGGGE
OK214_J_054                                             MKLALTFLLILMILPLMTGMKKSGDHERRSVKSMRDVFRDHR DCSSDCV---PHCPNRNECCDGDVCTYNSSLGKWF--CIGCGSGGGE
OK212_J_050                                             MKLALTFLLILMILPLMTGVKKSGDREGRSVKSMRDVFRDHR DCSSDCV---PHCPNRNECCDGDVCTYNSSLGKWF--CIGCGSGGGE
CebrOK033_J_038	                                        MKLALTFLLILMILPLMTGMKKSGDHERRSVKSMRDVFRDHR DCSSDCV---PHCPNRNECCDGDVCTYNSSLEKWF--CIGCGSGGGE
CebrOK035_J_049	                                        MKLALTFLLILMILPLMTGMKKSGDHERRSVKSMRDVFRDHR DCSSDCV---PHCPNRNECCDGDVCTYNSSLEKWF--CIGCGSGGGE

[Framework XI] 
[                                                       /----Signal-------/--------Pro-----------/ /----C------C-----CC---CC-------C-------C-----]
  
OK193_E_044                                             MKLALTFLLILMILPLMTGVKKSGDRERRSVKSMRDVFRDHR --QFKCVEGGENCRADSNCCSRVCCQLSTGKRCAFKQTVGCDDIHLN
OK213_E_051                                             MKLALTFLLILMILPLMTGVKKSGDRERRSVKSMRDVFRDHR --QFECVEGGENCRADSNCCSRVCCQLSTGKRCAFKQTVGCDDIHLN
OK006_E_057                                             MKLALTFLLILMILPLMTGMKKSGDHERRSVKSMRDVFRDHR --QFECVEGGENCRADSNCCSRVCCQLSTGKRCAFKQTVGCDDIHLN
OK214_J_055                                             MKLALTFLLILMILPLMTGVKKSGDHERRSVKSMRDVLRDHR --QFECVEGGENCLTDSSCCSYLCCQKTTGKRCAFKRTVGCDDIRLS
OK212_J_051                                             MKLALTFLLILMILPLMTGVKKSGDREGRSVKSMRDVFRDHR --QFECVEGGENCLVNSNCCSYLCCQKTTGKRCAFKRTVGCDDIRLS
SRX1323887_E_041	                                    MKLALTFLLILMILPLMTGVKKSGDRERRSVKSMRDVFRDHR --QFKCVEGGENCRADSNCCSRVCCQLSTGKRCAFKQTVGCDDIHLN
CebrOK033_J_039	                                        MKLALTFLLILMILPLMTGMKKSGDHERRSVKSMRDVFRDHR --QFECVEGGENCLVNSNCCSYLCCQKTTGKRCAFKRTVGCDDIRLS
CebrOK014_E_015	                                        MKLALTFLLILMILPLMTGVKKSGDRERRSVKSMRDVFRDHR --QFECVEGGENCRADSNCCSRVCCQLSTGKRCAFKQTVGCDDIHLN
CebrOK035_J_050	                                        ----------------------------------RDVFRDHR --QFECVEGGENCLVNSNCCSYLCCQKTTGKRCAFKRTVGCDDIRLS
OK005_J_043	                                            ----------------------SGDHERRSVKSMRDVFRDHR --QFECVEGGENCLVNSNCCSYLCCQKTTGKRCAFKRTVGCDDIRLS
OK214_J_056	                                            ----------------------SGDHERRSVKSMRDVFRDHR --QFECVEGGENCLVNSNCCSYLCCQKTTGKRCAFKRTVGCDDIRLS
ermineusAXL95458                                        MKLALTFLLVLMILPLMTGQKKSGDHERRSVKSLRAAFRGHR --QFECIEGGENCMVDSNCCSYLCCRKTTGRRCAFKRTVGCGDIRI-
ermineusAXL95760                                        MKLALTFLLVLMILPLMTGQKKSGDHERRSVKSLRAAFRGHR --QFECIEGGENCMVDSNCCSYLCCRKTTGRRCAFKRTVGCDDIRI-


[Superfamily I1-2]  
[Framework XI] 
[                                                       /------Signal-------/------Pro--------/ /-C------C-----CC---CC----C--------C----]

OK005_J_044                                             MKLCVTFLLLLVILPTVT-GEKSSERTLSGA--KG--DR GTCSYLGGICEHHFNCCGDLCCYGHKCVMTV--LPCDIFRF
OK212_J_052                                             MKLCVTFLLLLVILPTVT-GEKSSERTLSGA--KG--DR GTCSYLGGICEHHFNCCGDLCCYGHKCVMTV--LPCDIFRF
CebrOK035_J_051                                         MKLCVTFLLLLVILPTVT-GEKSSERTLSGA--KG--DR GTCSYLGGICEHHFNCCGDLCCYGHKCVMTV--LPCDIFRF
OK006_E_058                                             -----------------------------GA--KG--DR GTCSYLGGICEHHFNCCGDLCCYGHKCVMTV--LPCDIFRF
OK214_J_057                                             MKLCVTFLLLLVILPMVT-GEKSSERTLSGA--KG--DR GTCSYLGGICEHHFNCCGDLCCYGHKCVMTV--LPCDIFRF
OK005_J_045                                             MKLCVTFLLLLVILPMVT-GEKSSERTLSGA--KG--DR GTCSYLGGICEHHFNCCGDLCCYGHKCVMTV--LPCDIFRF
CebrOK033_J_040                                         MKLCVTFLLLLVILPMVT-GEKSSERTLSGA--KG--DR GTCSYLGGICEHHFNCCGDLCCYGHKCVMTV--LPCDIFRF
OK213_E_052                                             MKLCVTFLLLLVILPTVT-GEKSSERTLSGA--KG--DR RRCVTVGERCEQFSNCCGGMCCVGDRCVMTG--FPCVF---
OK006_E_059                                             MKLCVTFLLLLVILPTVT-GEKSSERTLSGA--KG--DR RRCVTVGERCEQFSNCCGGMCCVGDRCVMTG--FPCVF---
SRX1323887_E_042                                        MKLCVTFLLLLVILPTVT-GEKSSERTLSGA--KG--DR RRCVTVGERCEQFSNCCGGMCCVGDRCVMTG--FPCVF---
CebrOK014_E_016                                         MKLCVTFLLVLVILPSVT-GEKSSERTLSGA--KG--DR RRCVTVGERCEQFSNCCGGMCCVGDRCVMTG--FPCVF---
CebrOK016_E_017                                         MKLCVTFLLLLVILPTVT-GEKSSERTLSGA--KG--DR RRCVTVGERCEQFSNCCGGMCCDG-----------------
OK005_J_046                                             MKLCVTFLLLLVILPTVT-GEKSSERTLSGA--KG--DR RRCLTGGERCEHFSNCCGGMCCLSHVCVITA--IPCAF---
OK214_J_058                                             MKLCVTFLLLLVILPMVT-GEKSSERTLSGA--KG--DR RRCLTGGERCEHFSNCCGGMCCLSHVCVITA--IPCAF---
CebrOK033_J_041                                         MKLCVTFLLLLVILPMVT-GEKSSERTLSGA--KG--DR RRCLTGGERCEHFSNCCGGMCCLSHVCVITA--IPCAF---
OK212_J_053                                             MKLCVTFLLLLVILPTVT-GEKSSERTLSGA--KG--DR RRCLTGGERCEHFSNCCGGMCCLSHVCVITA--VTCGF---
CebrOK035_J_052                                         MKLCVTFLLLLVILPTVT-GEKSSERTLSGA--KG--DR RRCLTEGERCEHFSNCCGGMCCLSHMCVITV--VTCGF---
OK212_J_054                                             MKLCVTFLLLLVILPSVT-GEKSSERTLSGA--KG--DR GICSGLGGRCKHYSKCCGGMCCHGRKCVITG--FPCGF---
CebrOK016_E_018                                         MKLCVTFLLLLVILPTVT-GEKSSERTLSGA--KG--DR GICSGLGGRCEHYSKCCGGMCCHGHKCVITG--FPCGF---
CebrOK016_E_019                                         MKLCVTFLLVLVILPSVT-GEKSSERTLSGA--KG--DR GICSGLGGRCEHYSKCCGGMCCHGHKCVITG--FPCGF---
CebrOK035_J_053                                         MKLCVTFLLLLVILPTVT-GEKSSERTLSGA--KG--DR GTCSYVGGECYRDTDCCGNMCCIGYRCVMTT--AVC-----

OK005_J_047                                             MKLCVTFLLVLVILPSVT-GEKSGERTLRGDSLVG--DW GTCSDRGQECKHDYDCCDDLCCTGITCQFTY--IPCK----
OK213_E_053                                             MKLCVTFLLVLVILPSVT-GEKSGERTLRGDSLVG--DW GTCSDRGQECKHDYDCCDDLCCTGITCQFTY--FSCK----
CebrOK033_J_042                                         ---CVTFLLVLVILPSVT-GEKSSERTLSGAALRG--DR GTCSGRGQECKHDSDCCGHLCCAGITCQLTY--FSCK----
CebrOK016_E_020                                         MKLCVTFLLVLVILPSVT-GEKSSERTLSGAALRG--DR GTCSGRGQECKHDSDCCGHLCCAGITCQLTY--FSCK----
OK213_E_054                                             MKLCVTFLLVLVILPSVT-GEKSSERTLSGAALRG--DR GMCSDIGQGCGQDSDCCGDMCCVVQRCVMTI--ITCTF---
CebrOK016_E_021                                         MKLCVTFLLVLVILPSVT-GEKSSERTLSGAALRG--DR GMCSDIGQGCGQDSDCCGDMCCVGQRCVMTI--IACTF---
CebrOK033_J_043                                         ---CVTFLLVLVILPSVT-GEKSSERTLSGAALRG--DR GMCSDIGQGCGQDSDCCGDMCCVGQRCVMTI--IACTF---
episcopatusBAS22207                                     MKLCVTFLLILVILPSVT-GEKSSKRTLSGAALRG--DR GMCSGIGQGCGQDSNCCGDMCCYGQICVMTF--AACGP---
CebrOK035_J_054                                         MTLCVTFLLILVILPSVT-GEKSSKHTLSGAALRG--DR GTCSGIGQGCGQDSDCCWDMCCYGQICAMTV--MACRP---
CebrOK014_E_017                                         MKLCVTFLLVLVILPSVT-GEKSSERTLSGATLTG--DR GTCSFLGQGCGDHSDCCWDMCCASEMCVVTL--LPCK----
OK213_E_055                                             MKLCVTFLLILVILPSLT-GEKSSERTLSGAALRD--EW GTCSHIRQGCKHDSDCCGHLCCTGKSCVMTI--MPCNLFPF
OK193_E_045                                             -------------LPSVT-GEKSSERTLSGAALRD--EW GTCSHIRQGCKHDSDCCGHLCCTGKSCVMTI--MPCNLFPF
OK213_E_056                                             MKLCVTFLLILVILPSLT-GEKSSERTLSGAALRD--KW GTCSLLGKGCRHHSDCCWDLCCTGKTCVMTV--LPCHFFPL
OK005_J_048                                             -----------------T-GEKSSERTLSGAALRD--KW GTCSLLGKGCRHHSDCCWDLCCTGKTCVMTV--LPCNFFPL
CebrOK014_E_018                                         MKLCVTFLLVLVILPSVT-GEKSSERTLSGAGPKGGWEQ GTCSGIGKPCGHDPDCCGDLCCTGKTC--------------
magusDAC80562                                           MKLCVTFLLILVILPSVT-GKKSSEHTPSDAALRG--ER GTCSPIGQQCIDHDDCCGTMCCMGGNCGVPVYILPCHFNS-


[Superfamily I1-3]
[Framework VI/VII]

[                                                       /------Signal-----/-------Pro-------/ /-C------C----CC----C----C---------C---]

CebrOK016_E_022                                         MKLSVTFLLILMLLPVIAGGMESGKHTLRDVLKRSKR QNCI---YQCNDGSCCHGFGCTDGSYCGFA--------GR
magusDAC80562                                           MKLCVTFLLILVILPSVT-GKKSSEHTPSDAALRGER GTCSPIGQQCIDHDDCCGTMCCMGGNCGVPVYILPCHFNS

[Superfamily I2-1]  
[Framework XI]
[                                                       /----------Signal------------//C-------C-----CC----CC---C---C-----/-----Post-----]
											            
OK005_J_049                                             -MFRVTSVSCFLLVIVLLNL--AA--LTDA C-HLEGALCENDADCCL-LECCLWRCASNCE----KRGRRQALMALFG-QR
OK212_J_055                                             -MFRVTSVSCFLLVIVLLNL--AA--LTDA C-HLEGALCENDADCCL-LECCLWRCASNCE----KRGRRQALMALFG-QR
OK213_E_057                                             -MFRVTSVSCFLLVIVLLNL--AA--LTDA C-HLEGALCENDADCCL-LECCLWRCASNCE----KRGRRQALMALFG-QR
CebrOK033_J_044                                         -MFRVTSVSCFLLVIVLLNL--AA--LTDA C-HLEGALCENDADCCL-LECCLWRCASNCE----KRGRRQALMALFG-QR
OK212_J_056                                             -MFRVTSVGCFLLVIVLLNL--AA--LTDA C-HLEGALCENDADCCL-LECCLWRCASNCE----KRGRRQALMALFG-QR
OK214_J_059                                             -MFRVTSVRCFLLVIVLLNL--AA--LTDA C-HLEGALCENDADCCL-LECCLWRCASNCE----KRGRRQALMALFG-QR
OK006_E_060                                             -MFRVTSVRCFLLVIVLLNL--AA--LTDA C-HLEGALCENDADCCL-LECCLWRCASNCE----KRGRRQALMALFG-QR
OK214_J_060                                             -MFRETSVSCFLLVIVLLNL--AA--LTDA C-HLEGALCENDADCCL-LECCLWRCASNCE----KRGRRQALMALFG-QR
OK212_J_057                                             -MFRVTSVSCFLLVIVLLNL--AA--LTDA C-HLEGALCENDADCCL-LECCLWRCASS---------------------E
OK212_J_058                                             -----------------------A--LTDA C-HLEGALCENDADCCL-LECCLWRCASNCE----KRARRQALMAFFG-QR
OK212_J_059                                             -MFRVTSVGYFLLVIVLQNL--AA--LTDA C-HLEGALCENDADCCF-LECCLWRCASNCE----KRGRRQALMALFV-QR
OK212_J_060                                             -----------------LNF--AA--LTDA F-HLEGALCDNDADCCL-LECCLWSCASNCE----KRGRRQALMALFG-HR
OK005_J_050                                             -MFRVTSVSCFLLVIVLLNL--AA--LTDA C-HPEGTPCTNDEQCCL-MECCFWSCSSNCE----KRGRRQALMALFG-QR
OK212_J_061                                             -MFRVTSVSCFLLVIVLLNL--AA--LTDA C-HPEGTPCTNDEQCCL-MECCFWSCSSNCE----KRGRRQALMALFG-QR
OK213_E_058                                             -MFRVTSVSCFLLVIVLLNL--AA--LTDA C-HPEGTPCTNDEQCCL-MECCFWSCSSNCE----KRGRRQALMALFG-QR
OK212_J_062                                             -MFRVTSVSCFLLVIVLLNL--AA--LTDA C-HPEGTPCTNDEQCCL-MECCFWSCSSNCE----KRGRRQALMALLG-QR
CebrOK035_J_055                                         -MFRVTSVRCFLLVIVLLNL--AA--LTDA C-HPEGTPCTNDEQCCL-MECCFWSCSSNCE----KRGRRQALMALFG-QR
OK006_E_061                                             -MFRVTSVRCFLLVIVLLNL--AA--LTDA C-HPEGTPCTNDEQCCL-MECCFWSCSSNCE----KRGRRQALMALFG-QR
OK214_J_061                                             -MFRVTSVRCFLLVIVLLNL--AA--LTDA C-HPEGTPCTNDEQCCL-MECCFWSCSSNCE----KRGRRQALMALFG-QR
OK006_E_062                                             MMFRLTSVRCFLLVIVLLNL--AA--LTDA C-HPEGTPCTNDEQCCL-MECCFWSCSSNCE----KRGRRQALMALFG-QR
CebrOK033_J_045                                         -MFRVTSVSCFLLVIVLLNL--AA--LTDA C-QPEGTPCTNDEQCCL-MECCFWSCSSNCE----KRGRRQALMALFG-QR
OK212_J_063                                             -MFRVTSVSCFLLVIVLLNL--AA--LTDA C-HPEGTPCTNDEQCCL-MECCFWSCSSS---------------------E
OK212_J_064                                             -MFRVTSESCHIMVIVLLNL--AA--LTDA C-HPEGTPSTNDEQCCL-MECCLWSCSSNCE----KRGRRQALMALFG-QR
											            
SRX1323887_E_043                                        MMFRLTSVSCFLLVIVLLNL--VV--LTDA C-GAAGLPCPLNDPCCADMDCCGDVCLLNCE----KRGRRQVPLKLFG-QR
OK213_E_059                                             MMFRLTSVSCFLLVIVLLNL--VV--LTDA C-GAAGLPCPLHDPCCADMDCCGDVCLLNCE----KRGRRQVPLKLFG-QR
OK005_J_051                                             MMFRLTSVSCFLLVIVLLNL--VV--LTDA C-GAAGLPCPLNDPCCADMDCCGDVCSLNCE----KRGRRQVPLKLFG-QR
ebraeusAFR68335                                         MMFRLTSVSCFLLVIVLLNL--VV--LTDA C-GAAGLPCPLNDPCCADMDCCGDVCSLNCE----KRGRRQVPLKLFG-QR
ebraeusAFR68334                                         MMFRLTSVSCFLLVIVLLNL--VV--LTDA C-GAAGLPCPLHDPCCADMDCCGDVCSLNCE----KRGRRQVPLKLFG-QR
OK006_E_063                                             MMFRLTSVRCFLLVIVLLNL--VV--LTDA C-GAAGLPCPLNDPCCADMDCCGDVCSLNCE----KRGRRQALMALFG-QR
OK213_E_060                                             MMFRLTSVSCFLLVIVLLNL--VV--LTDA C-GAAGLPCPLHDPCCADMDCCGDVCLLNCE----KRGRRQALMALFG-QR
OK212_J_065                                             -----TSVSCFLLVIVLLNL--VV--LTDA C-GAAGLPCPLNDPCCADMDCCGDVCLLNCE----KRGRRKALMALFG-LR
											            
ermineusAXL95585                                        -MFRLTSVGCFLLAIVLLNL--VV--LTDA CHHHEGSLCLKDGDCCG-MRCCFWRCSSQCP----IPWLRQVPLNLFG-QR
SRX1323887_E_044                                        ---------CFLLVIVLLNL--VV--LTDA C-HHEGSPCTNDDGCCG-IECCSGTCSSNCPSN-GKRRRREVPVKVFG-QR
CebrOK035_J_056                                         MMFRFTSVGCFLLVIVLLNL--FV--LTDA C-HDEGVSCTSDDGCMC-SQCCSGVCSFNCPSN-GKRRRREVPVKVFG-QR
OK005_J_052                                             -MLRVTSVGCCLLVLVLLNL--VV--LTDA C-HDEGVPCTSDDGCLC-SECCFGHCSFHCN---EKRGRLQVPLKLFR-QR
litteratusC7DQX7                                        MMFRLTSVGSFLLVIVFLNL--VV--LTNA C-DLEGMFCMYDFECCL-SECCMGICAFGCT----KRAQRQKLLRSFG-QR
OK212_J_066                                             MMFRLTSVSCFLLFIVFLNL--VV--LTNA C-IPEGTFCQFNADCCL-SQCCWGSCGNPCR----FPGKRE----------
CebrOK014_E_019                                         MMFRLTSVSCFLLVIACLYL--VV--LTNA C-IREDAPCSFSAHCCG-RNCCRGYCERPCR----WIGKRTLFQNLHL-HH
CebrOK033_J_046                                         MMFRLTSVSCFLLVIACLYL--VV--LTNA C-IREDAPCSFSAHCCG-RNCCRGYCERPCR----WIGKRTLFQNLHL-HH
CebrOK014_E_020                                         -MVRVTSVGCFLLVIVFLNL--IVPTTTND C-IPEGSHCGVSSSCCK-STCCMETCQDPCR----YTWKRAKLQELFR-QR
OK213_E_061                                             ------SVGCFLLVIVFLNL--IVPTTTND C-IPEGSHCGVSSSCCK-STCCMETCQDPCR----YTWKRAKLQELFR-QR
CebrOK016_E_023	                                        ------------------------------ C-IPEGSHCGVSSSCCK-STCCMETCQDPCR----YTWKRAKLQELFR-QR
CebrOK016_E_024                                         ---RVTSVGCFLLVIVSLNL--VV--LTNA C-IPEGSSCSSSGSCCH-KSCCRWTCNQPCL----IPGKRAKLLEFFR-QR
OK005_J_053                                             -MVRVTSVSCFLLVIVFLNL--VV--PTNA C-AGNEQSCNTREDCCEPLNCCNNACDFPCR----IVGKRAKYREFFR-QR
OK213_E_062                                             -MVRVTSVSCFLLVIVFLNL--VV--PTNA C-AGNEQSCNTREDCCEPLNCCNNACDFPCR----IVGKRAKYREFFR-QR
													    
SRX1323887_E_045                                        MMFRLTSVSCFLLVIACLNLFQVV--LT SRC-FPPGIYCTPYLPCCW-GICC-GTCRNVCH---LRIGKRD----------
SRX1323887_E_046                                        MMFRLTSVSCFLLVIACLNLFQVV--LT RRC-FPLGTFCSRYLPCCS-GRCCSGWCTRRCF---PRFGKRATF------QE
virgoCAD90965                                           MMFRLTSVSCFLLVIACLNLFQVV--LT SRC-FPPGIYCTPYLPCCW-GICC-GTCRNVCH---LRIGKRATF------QE											           
													    
SRX1323887_E_047                                        -MFRVTSV---LLVIVLLNL--VV--LT NAC-HMD---------CSK-MTCCSGICCFYCGRPMCPGTRRALLQRLVGHQR
imperialisAME17665                                      -MFRVTSV---LLVIVLLNL--VV--LT NAC-HMD---------CSK-MTCCSGICCFYCGRPMCPGTRRALLQRLVGHQR
													    
[Framework VI/VII]                                                 
[                                                       /---------Signal--------------/-Pro//C-----C-------CC---C---C------/-----Post----]
											                       
OK006_E_064                                             -MFRVTSVRCFLLVIVLLNL--AV--LTDAY-RRKE CSTNGDCDSTF-AVCCNGVCVSNCE----ERRRRQVPLKLFG-QR
OK214_J_062                                             --------------IVLLNL--AV--LTDAY-RRKE CSTNGDCDSTF-AVCCNGVCVSNCE----ERRRRQVPLKLFG-QR
OK006_E_065                                             MMFRLTSVRCFLLVIVLLNL--AV--LTDAY-RRKE CSTNGDCDSTF-AVCCNGVCVSNCE----ERRRRQVPLKLFG-QR
OK193_E_046                                             MMFRLTSVSCFLLVIVLLNL--AV--LTDAY-RRKE CSTNGDCDSTF-AVCCNGVCVSNCE----ERRRRQVPLKLFG-QR
CebrOK014_E_021                                         MMFRLTSVSCFLLVIVLLNL--AV--LTDAY-RRKE CSTNGDCDSTF-AVCCNGVCVSNCE----ERRRRQVPLKLFG-QR
CebrOK016_E_025                                         MMFRLTSVSCFLLVIVLLNL--AV--LTDAY-RRKE CSTNGDCDSTF-AVCCNGVCVSNCE----ERRRRQVPLKLFG-QR


[Superfamily I2-2]  

																				    
[Framework XI]
[                                                       /--------Signal-------//---C------C------CC-----CC-------C-----C-------/--Pos-----]
 
OK006_E_066                                             MMCRLTSLCCLLVIVFLNSAAG G-IPCVGSGGFC-SPHVWCCDSLDVCCELPGPSMCTREAACESVGSALGRRAQYTRFFRR
OK214_J_063                                             MMCRLTSLCCLLVIVFLNSAAG G-IPCVGSGGFC-SPHVWCCDSLDVCCELPGPSMCTREAACESVGSALGRRAQYTRFFRR
OK212_J_067                                             MMCRLTSLCCLLVIVFLNSAAG G-IPCVGSGGFC-SSHVWCCDSLDVCCELPGPSMCTREGACESVGSALGRRAQYTRFFRR
OK212_J_068                                             -----TSLCCLLVIVFLHSAAG G-IPCVGSGGVC-SSHVWCCDSLDVCCELPGPSICTREGACESVGSALGRRAQYTRFFRR
OK212_J_069                                             -------LCCLLVIVFLNSAAG G-IPCVGSGGVC-SSHVWCCDSLDVCCELPGPSICTREGACESVGSALGRRAQFTRFFRR
OK213_E_063                                             MMCRLTSLCCLLVIVFLNSAAG G-IPCVGSGGVC-SSHVWCCDSLDVCCELPGPSMCTPEGACESVGSALGRRAQYTRFFRR
CebrOK014_E_022                                         MMCRLTSLCCLLVIVFLNSAAG G-IPCVGSGGVC-SSHVWCCDSLDVCCELPGPSMCTPEGACESVGSALGRRAQYTRFFRR
CebrOK016_E_026                                         MMCRLTSLCCLLVIVFLNSAAG G-IPCVGSGGVC-SSHVWCCDSLDVCCELPGPSMCTPEGACESVGSALGRRAQYTRFFRR
CebrOK033_J_047                                         MMCRLTSLCCLLVIVFLNSAAG G-IPCVGSGGVC-SSHVWCCDSLDVCCELPGPSMCTPEGACESVGSALGRRAQYTRFFRR
OK005_J_054                                             MMCRLTSLCCLLVIVFLNSAAG G-IPCVGSGGVC-SSHVWCCDSLDVCCELPGPSMCTPEAACESVGSALGRRAQYTRFFRR
CebrOK035_J_057                                         MMCRLTSLCCLLVIVFLNSAAG G-IPCVGSGGVC-SSHVWCCDSLDVCCELPGPSICTQEAACESVGSALGRRAQYTRFFRR
OK212_J_070                                             MMCRLTSLCCLLVIVFLNSAAG G-IPCVGSGGVC-SSHVWCCDSRDVCCELPGPSICTREGACESVGSALGRRAQYTRFVR-
OK212_J_071                                             MMGRLTSLCCLLVIVFLSSAAG G-IPCVGSGGVC-SSHVWCSDSLDVCCELPGPSICTREGACESVGSALGRRAQYIRFFRR
OK214_J_064                                             ------------------SAAG G-IPCVWSGGFC-SPHEWCCDSLDVCCELPGPSVCTREAACESVGSALGRRAQYTRFFRR
OK214_J_065                                             ------------VIVFLNSAAG G-IPCVGSGGVC-FSHVWCCDSFDVCCDLPGSSMCTREAACESVGSALGRRAQYTRFFRR

CebrOK035_J_058                                         MMCRMTSLCCLLVIVFLNSAVD G-IPCNLRGDWCFTGRMRCCSSHHVCCSVFGTGMCLRKIECPGPVFNQRRR---------

eburneusC7DQB9                                          MMFRLTSVWCLLVIVLLNSAVD GFIPCTGSEGYC-HSHMWCCNSFDVCCELPGPATCTREEACETLRIALGRRAQYKRFFRR

[Superfamily I3]  

[Framework XI] 
[                                                       /-------Signal-----/--------Pro--------/ /-----C------C-----CC---CC------C------C------------------------]

OK213_E_064                                             ------------LLPFHTGVETPGNHASRIATALRDRLLR P-K--RCYGSLHECENTDVCCTRYCCVK-AGYCFNM---CNNN----------------------
OK213_E_065                                             MKLFWAIVVILMLLPLRTGVETSDNHASRSATALRDRLLR P-K--RCYGSLHECENTDECCTGYCCVK-AGYCFNM---CNNN----------------------
SRX1323887_E_048                                        MKLFWAIVVILMLLPLRTGVETSDNHASRSATALRDRLLR P-K--RCYGSLHECENTDECCTGYCCVK-AGYCFNM---CNNN----------------------
OK005_J_055                                             MKLFLAIVVILMLLPLRTGVETSDNHASRSATALRDRLLR P-K--RCYGSLHECENTDECCTGYCCVK-AGYCFNM---CNNN----------------------
OK193_E_047                                             MKLFWAIVVILMLLPLRTGVETSDNHASRSATALRDRLLR P-K--ECLNDLDTCQNTSQCCGDSCCVT-AGYCLNM---CNDN----------------------
OK193_E_048                                             MKLFLAIVVILMLLPLRTGVETSDNHASRSATALRDRLLR P-K--ECLNDLDTCQNTSQCCGDSCCVT-AGYCLNM---CNDN----------------------
CebrOK033_J_048                                         MKLFLAIVVILMLLPLSTGVETSDNHASRSATALIDRLLR P-K--GCLGHLDNCWNDSQCCGALCCST-VSYCSDV---C-------------------------
CebrOK035_J_059                                         MKLFLAIVVILMLLPLSTGVETSDNHASRSATALIDRLLR P-K--GCLGHLDNCWNDSQCCGALCCST-VSYCSDV---C-------------------------
OK212_J_072                                             MKLFLAIVVILMLLPLSTGVETSDDHASRSATALRDLLLR H-E--GCLGHLDNCWNDSQCCGALCCST-VSYCSDV---C-------------------------
OK214_J_066                                             MKLFLAIVVILMLLPLSTGVETSDDHASRSATALRDLLLR H-E--GCLGHLDNCWNDSQCCGALCCST-VSYCSDV---C-------------------------
																								 
																								 
CebrOK014_E_023                                         MKLFLAIVVILMLLSLSTGGETSDNHAIRNATALRDRLLG P-KESKCQNAQGNCRDDSDCCGWLCCTGQSSGCAVTTMNCKEQ----------------PVQ---
CebrOK016_E_027                                         MKLFLAIVVILMLLSLSTGGETSDNHAIRNATALRDRLLG P-KESKCQNAQGNCRDDSDCCGWLCCTGQSSGCAVTTMNCKEQ----------------PVQ---
OK006_E_067                                             MKLFLAIVVILMLLSLSTGGETSDNHAIRNATALRDRLLG P-KESKCQNAQGNCRDDSDCCGWLCCTGQSSGCAVTTMNCKEQ----------------PVQ---
OK213_E_066                                             MKLFLAIVVILMLLSLSTGGETSDNHAIRNATALRDRLLG P-KESKCQNAQGNCRDDSDCCGWLCCTGQSSGCAVTTMNCKEQ----------------PVQ---
SRX1323887_E_049                                        MKLFLAIVVILMLLSLSTGGETSDNHAIRNATALRDRLLG P-KESKCQNAQGNCRDDSDCCGWLCCTGQSSGCAVTTMNCKEQ----------------PVQ---
OK193_E_049                                             ------------------GGETSDNHAIRNATALRDRLLG P-KESKCQNAQGNCRDDSDCCGWLCCTGQSSGCAVTTMNCKEQ----------------PVQ---
CebrOK033_J_049                                         MKLFLAIVVILMLLSLSTGGETSDKHASRSATALRDRLLG P-KASKCQNAQGNCSDDSDCCGWLCCTGQSSGCATTTVKCKEQ----------------PVQ---
CebrOK035_J_060                                         MKLFLAIVVILMLLSLSTGGETSDNHASRSATALRDRLLG P-KASKCQNAQGNCSDDSDCCGWLCCTGQSSGCATTTVKCKEQ----------------PVQ---
OK212_J_073                                             MKLFLAIVVILMLLSLSTGGETSDNHESRSATALRDRLLG P-KASKCQNAQGNCSDDSDCCGWLCCTGQSSGCATTTVKCKEQ----------------PVQ---
CebrOK035_J_061                                         MKLFLAIVVILMLLPLSTGVETSDNHASWSATALRDKLLG P-KAWRCRGTGGKCSGDGDCCGWLC----------------------------------------
OK006_E_068                                             MKLFLAIVVILMLLSLSTGVETSDNHASQSATALRDRLLG P-KATTCQGTSGVCSHHNDCCWWLCCNRQIGGCVVSTERCKSRATGRSSGMLVHPHLQQPADRSN
OK214_J_067                                             MKPFLAIVVILMLLSLSTGGETSDNHASRSATALRDRLLG PNRATTCQGTSGGCSHHNDCCWWLCCDRRISGCVVSTMRCKLRVTWRSSDMLVHPHLQQPAARSN
OK212_J_074                                             MKLFLAIVVILMLLSLSTGGETSDNHESRSATALRDRLLG PNRATTCQGTSGGCSHHNDCCWWLCCDRRISGCVVSTMRCKLRVTWRSSDMLVHPHLQQPAARSN
ermineusAXL95380                                        MKLFLAIVLILMLLSLSTGAETSDNHASRSATALRDRLLG P-KTWSCQWQGETCSHHHDCCGSLCCAG---SCAMTIIPCK------------------------
ermineusAXL95552                                        MKLSLAIVLILMLLSLSTGAETSDNHASRSATALRDRLLG P-KTWSCQWQGETCSHHHDCCGSLCCAG---SCAMTIIPCK------------------------
ermineusAXL95629                                        MKLSLAIVLILMLLSLSTGAETSDNHASRSATALRDRLLG P-KTWSCQWQGETCSHHHDCCGSLCCAG---SCVMTIIPCK------------------------
ermineusAXL95386                                        MKLFLAIVLILMLLSLSTGAETSDNHASRSATALRDRLLG P-KALTCRVRGERCTDDNDCCGWFCCAG---ACFFTFLPCK------------------------
OK005_J_056                                             MKLFLAIVVILMLLPLRTGVETSDNHASRSATVLRDRLLG P-KTPNCEQIGGSCSGSEGCCGSLCCIEQTRKCANTIVKCEK-----------------PNDK--
CebrOK035_J_062                                         MKLFLAIVVILMLLSLSTGAETSDNRA-RSVTALRDRLLR P-KSSVCQESGDPCSNHRDCCGSLCCDR---ECYNGFEPCI------------------------
praecellensATF27607                                     MKLFLAIVLILMLLSLSTGAERSDNHASRSATALRDRLLH P-KSWGCRETNEICFNSSNCCRDLSCFV-IYLWGKTTFRCM------------------------
OK212_J_075                                             -------------LPLSIGAETSDNHASRSATALRVWPLG P-MAPICRGTGGKCRYNSDCCGWLCCSGKLAVCANTVMPCKRG----------------PI----
CebrOK035_J_063                                         -------------------DMTSDGHA-RSATALRDGLRR S-K--GCLWRYGSCTTHSQCCPELCCNG-PRYCDYPIDRCKSGQ---------------------

[Framework VI/VII] 
[                                                       /-------Signal--------/-------Pro------/ /-----CC-----C-----CC----C------C-------------------------------]
													    

CebrOK014_E_024                                         MKLFWAIVVILMLLPLRTGVETSDDHASRSATALRDLLLR H-E--QCCGYLDKCENTTQCCEGYSCVT-AHYCDRN-----------------------------
CebrOK016_E_028                                         MKLFWAIVVILMLLPLRTGVETSDDHASRSATALRDLLLR H-E--QCCGYLDKCENTTQCCEGYSCVT-AHYCDRN-----------------------------
OK006_E_069                                             MKLFWAIVVILMLLPLRTGVETSDDHASRSATALRDLLLR H-E--QCCGYLDKCENTTQCCEGYSCVT-AHYCDRN-----------------------------
OK193_E_050                                             MKLFWAIVVILMLLPLRTGVETSDNHASRSATALTDLLLR H-E--QCCGYLDKCENTTQCCEGYSCVT-AHYCDRN-----------------------------
											            

[Superfamily I4]  
[Framework XII] 
[                                                       /----------Signal--------/ /C--------C-------C-C----CC----------C-----C--------/--------Post------]

OK005_J_057                                             -MFGHTSVRFLLLSTMLLGMAAMVLC SCDSDF-GETCEE--EKVCTCSHHGCCESTSSAKKDQCMTLAVCSAWV---SKRRAIQKQKRFLGMVRGLAS
OK214_J_068                                             -MFGHTSVRFLLLSTMLLGMAAMVLC SCDSDF-GETCEE--EKVCTCSHHGCCESTSSAKKDQCMTLAVCSAWV---SKRRAIQKQKRFLGMVRGLAS
OK006_E_070                                             -MFGHTSVRFLLLSTMLLGMAAMVLC SCDSDF-GETCEE--EKVCTCSHHGCCESTSSAKKDQCMTLAVCSAWV---SKRRAIQKQKRFLGMVRGLAS
OK212_J_076                                             -MFGHTSVRFLLLSTMLLGMAAMVLC SCDSDF-GETCEE--EKVCTCSHHGCCESTSSAKKDQCMTLAVCSAWV---SKRRAIQKQKRFLGMVRGLAS
CebrOK033_J_050                                         -MFGHTSVRFLLLSTMLLGMAAMVLC SCDSDF-GETCEE--EKVCTCSHHGCCESTSSAKKDQCMTLAVCSAWV---SKRRAIQKQKRFLGMVRGLAS
CebrOK035_J_064                                         -MFGHTSVRFLLLSTMLLGMAAMVLC SCDSDF-GETCEE--EKVCTCSHHGCCESTSSAKKDQCMTLAVCSAWV---SKRRAIQKQKRFLGMVRGLAS
OK213_E_067                                             ----------------------MVLC SCDSDF-GETCEE--EKVCTCSHHGCCESTSSAKKDQCMTLAVCSAWV---SKRRAIQKQKRFLGMVRGLAS
ermineusAXL95489                                        -MFGHTSARFLLLSIMLLGMAAMVLC TCNYSF-GETCEQ----ICSCSNHVCCSTTSPVKKNQCMTPSTCMTWAIGNGKRRAIQRQKRFLGMVRGLDS
CebrOK035_J_065                                         -MFGHTSVRFLLLSIMLLGMAAMVLC SCDYAY-GGLCEK--VKTCKCSNHRCCESGSSDGEDQCMTERSCKNSKSDITKRKAIQKQKSFLGMMR----
andremeneziATF27403                                     -MFGHTSVRFLLLSIMLLGMVAMVWC SCG-TL-GEECEG--ETACRCSNHECCNMEPTPRKDQCMTQHACYIVHSGKRRRRVIQKQKRFLGMPRGHAR
OK213_E_068                                             -MSGHTSVNFLLLSIVALGMVATVIC SCDSEFSSEFCEQPEES-CSCSTHTCCHW---SRKDQCMKPQRCISAQKGNGRRRLIHMQK-----------
eburneusACV13218                                        -MFGHTSVSFLLLSIMALGMVATVIC SCDSEFSSEFCEQPEERICSCSTHVCCHLS-SSKRDQCMTWNRCLSAQTGN--RRSTHMQKRFLRMPRDLAD
OK213_E_069                                             -------------------------- --------EFCEQPEERICSCSTHVCCHLS-SSKRDQCMTWNRCLSAQTGN--RRSTHMQKRFLRMPRDLAD
OK005_J_058                                             -MSGHTSVNFLLLSIVALGMVATVIC SCDSEFSSEFCEQPEERICSCSTHVCCHLS-SSKRDQCMT--------------------------------
SRX1323887_E_050                                        MMSRSTSTRFLLLSALLLGMVAMVLS SCEGSVSGETCNG---NLCKCPNHVCCSL--PSRRPQCMDFDYCLFITKNSQRRRV--QRNTLPRMLRGHAN
CebrOK016_E_029                                         -------------------------- ----SVSGETCNG---NVCKCPNHVCCSL--PSRRPQCMDFDYCLFITKNSQRRRV--QRNTLPRMLRGHAN

[No Framework] 
[                                                       /----------Signal--------/ /C--------C-------C-C----CCC---------C-----C---------------------------]

OK214_J_069                                             -MFGHTSVNFLLLSIMVVGMVTTVIC SCV-DISTESCEDPEEKTCSCNNHVCCCFN-SPKKDQCMTRAMCHSAHGGSRRRRSTRIQKGVFHWMDCYD-
CebrOK035_J_066                                         -MFGHTSVNFLLLSIMVVGMVTTVIC SCV-DISTESCEDPEEKTCSCNNHVCCCFN-SPKKDQCMTRAMCHSAHGGSRRRRSTRIQKGVFHWMDCYD-


[Superfamily J-1]  
[Framework XIV] 
[                                                       /----------Signal-------/ /------------------------C---C------------C-C-/--Post--------------------------]

										                
CebrOK035_J_067                                         ------------------------- -SPGTAQRSGHRTARVPAEHILDIICPTMCHLGV----GEPFCNCPDKRDVVSSRIRRRKRSMAV---------------
CebrOK033_J_051                                         ---VQSVTC-CCLLWLMLSVQLVNP GSPGTAQLSGHLTARLPAEIIWERICPGMCLGGYG---KEPFCHCTEKRDAVSSRIRRRKRSAAV---------------
OK006_E_071                                             MVSVQSVAC-CCLLWLMLSVQLVNP GSPGTAQLSGNPIAGLSIESALEAICPEMCNEGIG---EKPFCHCTKKRDVVSSRIRRRKRSMV----------------
CebrOK035_J_068                                         MASVQSVTC-CCLLWLMLSVQLVNP GSPGTAQRSGDRT----PEQKLEFICPGICAEGA----ATGICDCTKKRVVDSSWIRRRKRSTV----------------
ferrugineusQ0N4U4                                       MPSVRSVTC-CCLLWMMLSVQLVTP GSPGTAQLSGHRTARSPG----STICKMACRTGNGH--KYPFCNCRGKRDVVSS-------SMAV---------------
planorbisADZ74179                                       MPSVRSVTC-CCLLWMMLSVQLVTP GSPGTAQLSGHRTARFPR----PRICNLACRTGIGY--KYPFCHCRGKRDAVSS-------SMAV---------------
																				  
CebrOK016_E_030                                         MTSVQSVTCFCCLLWLMISVQLVTS GLTGTARLSKHLTARIPSEANMEILCPEWCNEGY----DGYGCTCTKRQDVVSSPIRRRKRSMRV---------------
CebrOK033_J_052                                         MASVQSVTGFCCLLWLMISVQLVTS GLTGTARLSKHLTARIPSEANMEILCPEWCNEGY----DGYGCTCTKRQDVVSSPIRRRKRSMRV---------------
OK213_E_070                                             MASVQSVTGFCCLLWLMISVQLVTS GLTGTARLSKHLTARIPSEANMEILCPEWCNEGY----DGYGCTCTKRQDVVSSPIRRRKRSMRV---------------
OK214_J_070                                             MASVQSVTGFCCLLWLMISVQLVTS GLTGTARLSKHLTARIPSEANMEILCPEWCNEGY----DGYGCTCTKRQDVVSSPIRRRKRSMRV---------------
OK006_E_072                                             MASVQSVTGFCCLLWLMISVQLVTS GLTGTARLSKHLTARIPSEANMEILCPEWCNEGY----DGYGCTCTKRQDVVSSPIRRRKRSMRV---------------
OK212_J_077                                             MASVQSVTGFCCLLWLMISVQLVTS GLTGTARLSKHLTARIPSEANMEILCPEWCNEGY----DGYGCTCTKRQDVVSSPIRRRKRSMRV---------------
CebrOK035_J_069                                         MASVQSVTGFCCLLWLMISVQLVTS GFTGTARLSKHLTARIPSEANMEILCPEWCNEGY----DGYGCTCTKRQDVVSSPIRRRKRSMRV---------------
OK214_J_071                                             MASVQSVTVFCCLLWLMISVQLVTS GLTGTARLSKHLTARILSEANMEILCPEWYNEGY----DGYGCNCIKRQDVVSLPIRK----------------------
betulinusAGE10497                                       MPSVRSVTC-CCLLWMMFSVQLVTS DLTGTAWLSTHLDARIPSEENMEVLCPEMCNEGS----GGVACSCSKRRDVVSSFVRRRKRSMV----------------
magusQFQ61020                                           MTSVQSVTC-CCLLWLMLSVQLVTP DSPATAQLSRHLTARVPVGDPLQHTCSEWCNEGQ----DVAVCTCAQRRDVVSSSLRRRKRSMRL---------------
																				  
CebrOK014_E_025                                         MASVQSVTC-CCFLWLMLSVQLITP GSPGTAHLPRD--TRDVPEIVLEFMCPVICGNGF----GEEYCNCTKKRDMVSSRIR-RKRSMAM---------------
CebrOK016_E_031                                         MASVQSVTC-CCFLWLMLSVQLITP GSPGTAHLPRD--TRDVPEIVLEFMCPVICGNGF----GEEYCNCTKKRDMVSSRIR-RKRSMAM---------------
CebrOK033_J_053                                         MASVQSVTC-CCFLWLMLSVQLITP GSPGTAHLPRD--TRDVPEIVLEFMCPVICGNGF----GEEYCNCTKKRDMVSSRIR-RKRSMAM---------------
OK213_E_071                                             ---VQSVTC-CCFLWLMLSVQLVTP SPPGTAHLPRD--TRDVPEIVLELMCPMLCPNGF----GGEYCTCTKKRDMVSSRIS-RKRSMAM---------------
OK005_J_059                                             MTSVQSVTC-CCFLWLMLSVQLVTP SPPGTAHLPRD--TRDVPEIVLELMCPMLCPNGF----GGEYCTCTKKRDMVSSRIS-RKRSMAM---------------
CebrOK035_J_070                                         MTSVQSVTC-CCFLWLVLSVQPIAP GSPRTAHLPRD--ANGIPEAMLEALCPVICLGNF----AAEYCNCKAKRDMVSSRIR-RKMSMAM---------------
CebrOK014_E_026                                         MASVQSVTC-CCFLWLMLSVQLITP SSPGTAHLPRNGSDRDMPNVFVSILCYAFCTGGI----EIDDCDCSQILDLFSQ-IS-RKRSMAM---------------
CebrOK016_E_032                                         MASVQSVTC-CCFLWLMLSVQLITP SSPGTAHLPRNGSDRDMPNVFVSILCYAFCTGGI----EIDDCDCSQILDLFSQ-IS-RKRSMAM---------------
CebrOK033_J_054                                         MASVQSVTC-CCFLWLMLSVQLITP SPPGTAHLPRNGSDRDMPNVFVSILCYAFCTGGI----EIDDCDCSQILDLFSQ-IS-RKRSMAM---------------
CebrOK014_E_027                                         MASVQSVTC-CCFLWLMLSVQLITP SSPGTAHLPRDVTDRYTPNDAESSVCYFLCLMGI----DLDECNCPEKRDLVSSLIS-RKRSMAM---------------
CebrOK016_E_033                                         MASVQSVTC-CCFLWLMLSVQLITP SSPGTAHLPRDV-----PDDAESSVCYFLCLMGI----DLDQCNCPEKRDLVSSLIS-RKRSMAM---------------
CebrOK033_J_055                                         MASVQSVTC-CCFLWLMLSVQLITP SPPGTAHLPRDV-----PDDAESSVCYFLCLMGI----DLDQCNCPEKRDLVSSLIS-RKRSMAM---------------
OK213_E_072                                             ---VQSVTC-CCFLWLMLSVQLVTP SPPGTAHLPRDGTDRDIPNDDESAVCYFLCLMGI----NLDECNCPEKRDLVFTDQ------------------------
OK005_J_060                                             MTSVQSVTC-CCFLWLMLSVQLVTP SPPGTAHLPRDGTDRDIPNDDESAVCYFLCLMGI----NLDECNCPEKRDLVFTDQ------------------------
OK005_J_061                                             MTSVQSVTC-CCFLWLMLSVQLVTP SSPGTAHLPRDGSDRESRDFFLDILCTFFCFDKLGFDFGGEFCDCSEVSDFGLLPDQ-----------------------
SRX1323887_E_051                                        MSSVQSVTC-CCLLWLMLSVQLVTP GSPGTAHLPWDPSASLPAEHMREIICRHMCILPHW---VPHSCKCPNGGDKVTPSPTWRKRSMAV---------------
																				  
CebrOK014_E_028                                         MASVQSVTC-CCLLWLMLS------ GSPGTAQPPGHPSPD---------LCKLLCENGL----KIHFCDCKYERDVDSLWIRRRKGSTVRLHTHTSDDEDSIGWD
OK006_E_073                                             MASVQSVTC-CCLLWLMLS------ GSPGTAQPPGHPSPD---------LCKLLCENGL----KIHFCDCKYERDVDSLWIRRRKGSTVRLHTHTSDDEDTIGWD

[Superfamily J-2]  
[Framework XIV] 
[                                                       /-----------Signal-----------/---Pro----/ /-------C---C--------C----C-------------------]


                                                   
OK214_J_072                                             MQSVQSLTRCCLLVLLLSAFCVSPLPLGASQPLPQQLNIER GIPKDFDPCNRLCAQGNPTDDCKQRVCPTPPDVTETQREGTKLSMAP
OK212_J_078                                             MQSVQSLTRCCLLVLLLSALCVSPLPLGASQPLPQQLNTER GIPKDFDPCNRLCAQGNPTDDCKQRVCPTPPDVTETQREGTELSMAP
CebrOK033_J_056	                                        MQSVQSLTRCCLLVLLLSALCVSRLPLGASQPLPQQLNTER GIPKDFDPCNRLCAQGNPT----------------------------
CebrOK035_J_071	                                        MQPVQSVTRCCLLLLLLSALCVSPHPLGISQPVPQQLNSKR MVPKDFDPCKKLCVGLNPPANCQ---CSGTPDVVETTR--TKVSTAP
A_1387_162                                              MPSVQSVTRCCLLLLLLSGLCVCPLPFGISQPLPQQLNIER RIDEDFDGCVEGCLYPMPPASCN---CQGTRDVVDLKR--TELSMAP
K_0010_014                                              ----QSVTRCCLLLLLLSALCGSPLPFGISQPLPQQLNIER GIPKGSKSCEELCIYPLPPANCN---C--------------------
V_1302_034                                              MPSVQSVTRCCLLLLLLSALCVCPLPLRISQPLPQQLNIER GIPKEFESCNVLCARLDPPARCN---CPGTPDVVEVKKR-TEVSMAP


[Superfamily K]  
[Framework XXIII]
[                                                       /------Signal-------/----Pro---/ /-C------C---C-------------CC--------------C----]
													    
OK214_J_073                                             MNMRMMLTLFVLVVVTTVSASEH---EAKK-R HPCDESVKACYGWCIELPY-LRDD--ICCRFVDSIPDLPDGE-CDKLET
OK214_J_074                                             MNMRMILTLFVLVVVTTVSASEH---EAKK-R HPCDESVKACYGWCIELPY-LRDD--ICCRFVDSIPDLPDGE-CDKLET
OK005_J_062                                             --MRMMLTLFVLVVMTTVSASEH---EAKK-R HPCDESVKACYGWCLELPY-LRDD--ICCRFVDSIPDLPDGE-CEKLET
OK212_J_079                                             MNMRMMLTLFVLVVVTTVSASEH---EAKK-R HPCDESVKACYGWCLELPY-LRDD--ICCRFVDSIPDLPDGE-CEKLET
OK213_E_073                                             MNMRMMLTLFVLVVMTTVSTSEH---EAKK-R HPCDVSVEGCLNWCKELPY-LRHD--KCCRFVDSIPDLSDGE-CEKLET
CebrOK033_J_057         	                            MNMRMILTLFVLVVMTTVSASEH---EAKK-R HPCDESVKACYGWCLELPY-LRDD--ICCRFVDSIPDLPDGE-CEKLET
SRX1323887_E_052	                                    MNMRMMLTLFVLVVMTTVSTSEH---EAKK-R HPCDVSVEGCLNWCKELPY-LRHD--KCCRFVDSIPDLSDGE-CEKLET

OK193_E_051                                             MNMRMMLTLFVLVVVTTVSTSEH---EAKK-R HPCDVSVEGCLNWCKELPY-LRHD--KCCRFVDSIPDLSDGE-CKKLET
CebrOK035_J_072	                                        MNMRMMLTLFVLVVMTTVSTSEH---EAKK-R HPCDESVKACYDWCIELPY-L----------------------------
ermineusAXL95565                                        MNMRMMLTLFVLVVVTTVSASEH---EAKR-Q HPCDESVEACYDWCKQLLD-LRDD--KCCRFVDVSSVLSS---------
V_1258_029                                              MNMRMMLTLFVLVVMTTVSASEH---EANRPD RDCGNTWEECYAWCKELPY-IPSEMQNCCRFVNSIPRLENRD-CADYD-
A_0055_209                                              MNMRMMLALLVLVVMTTVSASEHGLTEAKE-T KQC-STSLGCFNWCRYWFYRLPIT--TCCELVQEIGFWPPVRYCS----
OK213_E_074                                             MIMRMTLTLFVLVVMTAASASGDALTEAKR-I PYCGQTGAECYSWCIKQD--LSKD--WCCDFVKDIRMNPPADKCP----
SRX1323887_E_053	                                    MIMRMTLTLFVLVVMTAASASGDALTEAKR-V PYCGQTGAECYSWCKEQH------LIRCCDFVKYVGMNPPADKCR----
	
[Framework XXIV]
[                                                       /------Signal---------/--Pro--/ /-------------C-------------CC--------------C----]
													    
OK006_E_074                                             MNMRMTLTLFVLVVMTAASASGHALTEAKR- DDDE-LNAVTLYYWCTTYG--FSPD--YCCKYVRRRGLKLPAALCS----
imperialisD0PX85                                        MIMRMTLTLFVLVVMTAASASGDALTEAKR-I PYCGQTGAECYSWCIKQD--LSKD--WCCDFVKTIARLPPAHICSQ---


[Superfamily L]  
[Framework XIV] 
[                                                       /------Signal-------/------------Pro------------/ /---C---C-----C----C----/P]
													    
													    
OK213_E_075                                             MKLLVTFIVVLMLATSLTYGFSLFSNNGERRAFEPRDPDAADQLVREER ATRTCNPPCTGLAMCQSGTCGYVRFR
OK006_E_075                                             MKLLVTFIAVLMLATSLTYGFSLFSNNGERRAFEPRDPDAADQLVREER ATRTCNPPCTGLAMCQSGTCGYVRFR
SRX1323887_E_054	                                    MKLLVTFIAVLMLATSLTYGFSLFSNNGERRAFEPRDPDAADQLVRKER ATRTCNPPCTGLAMCQSGTCGYVRFR
OK212_J_080                                             MKLSVTFFLVLMLTTSLTCGFNHFSNNGK-RAYGPHDRSAAHRLVSEKQ ARSLCHPPCTGLSMCHGGMCGYIRFR
CebrOK014_E_029	                                        MKLLVTFIAVLMLATSLTYGFSLFSNNGERRAFEPRDPDAADQLVREER ATRTCNPPCTGLAMCQSGTCGYVRFR
CebrOK016_E_034	                                        MKLLVTFIAVLMLATSLTYGFSLFSNNGERRAFEPRDPDAADQLVREER ATRTCNPPCTGLAMCQSGTCGYVRFR
SRX1323887_E_055	                                    ------FIVVLMLTTSLTFGFSLSSNNGERAYGSHHSYVADQLVRRERA -SRACNPPCSDILTCLHGTCKHLGI-
flavidusAFU50771                                        MKLSVTFIVVLMLTTSLTFGFSLSSNNGERAYGSHHSYVADQLVRRERA -SRACNPPCSDILTCLHGTCKHLGIG
ermineusAXL95523                                        MKMSVTFIVVLMLTTSLTCGFSLFSNNGD-RAVGPHDPDAADQLVREER ANLACNPPCTGNAMCQNGACGYIRFR
ermineusAXL95524                                        MKLSVTFIVVLMLTTSLTCGFSLLSNNGE-RA---NAASAADQLVHEER ASRACNPPCTGLSMCQGGKCGYKRFG

[Superfamily M-1]  
[Framework III]

[                                                       /-------Signal-----/----------------Pro------------------//CC----C---C--CC----]

CebrOK014_E_030                                         MMSKLGALLTICLLLFSLTAVPLDGDQHADQPAQRLQDRIPTEDHPL-----FDPNKR CCPPVACNMGCKPCCG----
CebrOK033_J_058                                         -MSKLGALLIICLLLFSLTAVPLDGDQHADQPAQRLQDRIPTEDHPL-----FDPNKR CCDDSECSYSCWPCCYG---
CebrOK016_E_035                                         MMSKLGALLTICLLLFSLTAVPLDGDQHADQPAQRLQDRIPTEDHPL-----FDPNKR CCDDSECSYSCWPCCYG---
CebrOK014_E_031                                         MMSKLGALLTICLLLFSLTAVPLDGDQHADQPAQRLQDRIPTEDHPL-----FDPNKR CCDDSECSYSCWPCCYG---
gloriamarisAEX60388                                     MMSKLGALLTICLLLFSLTAVPLDGDQHADQPAERLHDRLPTENHPL-----YDPVKR CCDDSECDYSCWPCCMFG--
OK005_J_063                                             MMSKLGALLTICLLLFSLTAVPLDGDQHADQLAERLQDRLPTENHPL-----YDPVKR CCNDSECDYSCWPCCIFS--
																												   
CebrOK035_J_073                                         MMSKLGALLTICLLLFPITGLPLDEDQPADLPALRMED-SATEHSPW-----FDPVKR CCSST-C-WECTPCCN----
CebrOK035_J_074                                         MMSKLGALLTICLLLFPITGLPLDEDQPADLPALRMED-SATEHSPW-----FDPVKR CCSKI-C-WKCTPCCK----
CebrOK033_J_059                                         MMSKLGVLLTICLLLFPITGLPLDEDQPADLPALRMED-SATEHSPW-----FDPVKR CCSKT-C-WKCTPCCK----
OK006_E_076                                             MMSKLGVLLTICLLLFPITGLPLDEDQPADLPALRMED-SATEHSPW-----FDPVKR CCSKT-C-WKCTPCCK----
OK005_J_064                                             MMSKLGVLLTICLLLFPITGLPLDEDQPADLPALRMED-SATEHSPW-----FDPVKR CCSKT-C-WKCTPCCK----
OK212_J_081                                             MMSKLGVLLTICLLLFPITGLPLDEDQPADLPALRMEN-SATEHSPW-----FDPVKR CCSKT-C-WKCTPCCK----
SRX1323887_E_056                                        MMSKLGVLLTISLLLFPLTAVQLDGDQPVDLPALRTQD-FAPEHSPW-----FDPVKR CCSQE-C-LVCMPCC-----
lividusAEX60359                                         MMSKLGVLLTICLLLFPLTAVQLDGDQPVDLPALRTQD-FAPEHSPW-----FDPVKR CCSRD-C-WVCIPCCPNGSA
eburneusADZ99302                                        MMSKLGVLLTICLLLFPLTAVQLDGDQPADLPALRAQD-FAPERSPW-----FDPVKR CCSQD-C-WVCIPCCPN---
betulinusAEX60382                                       MMSKLGVLLTVCLLLFPLTAVPMDGDQPADLPALRMQD-FAPEHSPW-----FDPVRR CCSQD-C-RVCIPCCPH---
OK213_E_076                                             MMSKLGVLLTICLLLFPITGLPLDEDQPADLPALRTQD-FEPEHSPW-----FDPVRR CCSQN-C-LTCIPCCPY---
OK193_E_052                                             MMSKLGVLLTICLLLFPITGLPLDEDQPADLPALRTQD-FEPEHSPW-----FDPVRR CCSQN-C-LTCIPCCPY---
																												   
CebrOK035_J_075                                         --------------------LPLDEDQPADLPAERMQD-IATEQHPL-----FDPVKR CCVGP-CYMGCIPCCL----
CebrOK033_J_060                                         MMSKLGVLLTICLLLFPLTALPLDEDQPADLPAERMQD-IATEQHPL-----FDPVKR CCVGP-CYMGCIPCCL----
OK214_J_075                                             MMSKLGVLLTICLLLFPLTALPLDEDQPADLPAERMQD-IATEQHPL-----FDPVKR CCVGP-CYMGCIPCCL----
OK193_E_053                                             ------------------------EDQPADLPAERMQD-IATEQHPL-----FDPVKR CCAQP-CYMGCIPCCF----
CebrOK016_E_036                                         MMSKLGVLLTICLLLFPLTALPLDEDQPADLPAERMQD-IATEQHPL-----FDPVKR CCAQP-CYMGCIPCCF----
OK213_E_077                                             MMSKLGVLLTICLLLFPLTALPLDEDQPADLPAERMQD-IATEQHPL-----FDPVKR CCAQP-CYMGCIPCCF----
OK213_E_078                                             MMSKLGVLLTICLLLFPLTALPLDEDQPADLPAERMQD-IATEQHPM-----FDPVKR CCRKQSC-TTCMPCCVD---
CebrOK035_J_076                                         MMSKLGVLLTICLLLFPLTALPLDEDQPADLPAERMQD-IATEQHPM-----FDPVKR CCRKQSC-TTCMPCCWG---
OK212_J_082                                             MMSKLGVLLTICLLLFPLTALPLDEDQPADLPAERMQD-IATEQHPM-----FDPVKR CCRKQSC-TTCMPCCWG---
OK006_E_077                                             MMSKLGVLLTICLLLFPHTALPLDGDQPADQPAERMQD-IATEQHPM-----FDPVKR CCRKQSC-TTCMPCCWG---
										                

[Superfamily M-2]  
[Framework III]
[Mu/ Psi]
[                                                       /--------Signal-----/------------------------Pro-----------------------------//CC-----C---C-------C-----C/-]

CebrOK035_J_077                                         MMSKLGALLTICLLLFPLTALPLDGDQPAD----RPAERMQDNISSEQHPLFDKER---------------------G CCTAG--CHDRCS-----PC-----CG--
OK214_J_076                                             MMSKLRILLTICLLLFPLTAVPLDGDQPAD----RPAERMQDDISSEKHPLFEKRR---------------------G CCNGR-G----------------------
OK005_J_065                                             MMSKLRILLTICLLLFPLTAVPLDGDQPAD----RPAERMQDDISSEHHRFFDPVK---------------------R CCRLA--CGLGCH-----PC-----CG--
OK005_J_066                                             MMSKLRILLTICLLLFPLTAVPLDGDQPAD----RPAERMQDDISSEHHPRFGSGK---------------------R CCNAS-ACIVGCR-----PC-----CL--
OK005_J_067                                             MMSKLRILLTICLLLFPLTAVPLDGDQPAD----RPAERMQDDISSERHPMFDAVR---------------------D CCPLP-ACPFGCE-----PC-----CG--
OK005_J_068                                             MMSKLRILLTICLLLFPLTAVPLDGDQPAD----RPAERMQDDISSERHPMFDAVR---------------------D CCPLP-ACPFGCN-----PC-----CG--
OK213_E_079                                             MMSKLGVLLTICLLLFPLTAVPQDGDQPAD----RPAERMQDDISSEHHRFFDPVK---------------------R CCRLA--CGLGCH-----PC-----CG--
OK193_E_054                                             MMSKLRILLTICLLLFPLTAVPLDGDQPAD----RPAERMQDDISSEHHRFFDPVK---------------------R CCRLA--CGLGCH-----PC-----CG--
CebrOK035_J_078                                         MMSKLGALLTICLLLFPLTALPLDGDQPAD----RPAERMQDAISSEHHPFFDPVK---------------------R CCRLS--CGLGCH-----PC-----CG--
OK213_E_080                                             MMSKLGVLLTICLLLFPLTAVPQDGDQPAD----RPAERMQDDISSEHHRFFDPVK---------------------R CCAPS-ACRLGCR-----PC-----CRL-
SRX1323887_E_057                                        MMSKLGVLLTICLLLFPLTAVPLDGDQPAD----RPAERMQDDISSERHRFFDPVK---------------------R CCAPS-ACRLGCR-----PC-----CR--
OK193_E_055                                             MMSKLRILLTICLLLFPLTAVPLDGDQPAD----RPAERMQDDISSEHHRFFDPVK---------------------R CCAPS-ACRLGCR-----PC-----CRL-
CebrOK035_J_079                                        MMSKLGALLTICLLLFPLTALPLDGDQPAD----RPAERMQDAISSEHHPFFDPVK---------------------R CCRYGWTCWLGCT-----PCD----C---
OK213_E_081                                             -MSKLGVLLTICLLLFPLTAVPQDGDQPAD----RPAERMQDDISSEHHRRFGSGK---------------------R CCNAS-ACIVGCR-----PC-----CL--
OK213_E_082                                             MMSKLRILLTICLLLFPLTAVPQDGDQPAD----RPAERMQDDISSEHHRRFGSGK---------------------R CCNAS-ACIVGCR-----PC-----CL--
OK213_E_083                                             MMSKLGVLLTICLLLFPLTAVPQDGDQPAD----RPAERMQDDISSERHPMFDAVR---------------------D CCPLP-ACPFGCE-----PC-----CG--
OK213_E_084                                             -----GVLLTICLLLFPLTAVPQDGDQPAD----RPAERMQDDISSERHPMFDAVR---------------------D CCPLP-ACPFGCN-----PC-----CG--
OK193_E_056                                             MMSKLRILLTICLLLFPLTAVPLDGDQPAD----RPAERMQDDISSEHHPRFGSGK---------------------R CCNAS-ACIVGCR-----PC-----CL--
OK193_E_057                                             MMSKLRILLTICLLLFPLTAVPLDGDQPAD----RPAERMQDDISSERHPMFDAVR---------------------D CCPLP-ACPFGCE-----PC-----CG--
OK193_E_058                                             MMSKLRILLTICLLLFPLTAVPLDGDQPAD----RPAERMQDDISSERHPMFDAVR---------------------D CCPLP-ACPFGCN-----PC-----CG--
OK193_E_059                                             MMSKLGVLLTICLLLFPLTALPMDGDQSVD----RLAERMQDDISSEQHPLFNQKR---------------------R CCGEGSSCPRYFRDNFICGC-----C---
OK193_E_060                                             MMSKLGVLLTICLLLFPLFALPLDGDQPAD----RPAERMQDDISSEQHPLFNQKR---------------------R CCGEGSSCPRYFRDNFICGC-----C---
OK006_E_078                                             MMSKLGVLLTICLLLFPHTALPLDGDQPAD----RPAERMQDDISSEQHPLFNQKR---------------------R CCGEGSSCPRYFR----------------
OK193_E_061                                             MMSKLGVLLTICLLLFPLTALPINGDQPAD----QPAERMQDDISSEQYPLFDKRQ---------------------K CCTGK-KGSCSGR-----ACKNLRCCAGR
OK193_E_062                                             MMSKLGVLLTICLLLFPLTALPMDGDQSVD----RLAERMQDDISSEQHPLFNQKR---------------------R CCTGK-KGSCSGR-----AC---------
OK193_E_063                                             MMSKLGVLLTICLLLFPLFALPLDGDQPAD----RPAERMQDDISSEQHPLFNQKR---------------------R CCTGK-KGSCSGR-----AC---------
CebrOK033_J_061                                         ----------------------LDGDQPAD----RYAERMQDDISSE-HPLFDAVR---------------------G CCHLL-ACRMGCT-----PC-----CW--
CebrOK033_J_062                                         MMFKLGVLLTICLLLFSLNAVPLDGDQPAD----QPAERLLDDISFENNPFYDPAK---------------------R CCR---TC-FGCT-----PC-----CG--
OK005_J_069                                             ---------TICLLLFSLNAVPLDGDQPAY----QPAERLLDDISSENNPFYDPAK---------------------R CCM---TC-FGCT-----PC-----CG--
SRX1323887_E_058                                        MMSTLGVLLTICLLLFPLTALPLDGDQPADQSAERPAERTQDDI--QQHPLYDPKR---------------------R CCRYP--CPDSCH----GSC-----CYK-
CebrOK014_E_032                                         MMSKLGVLLTICLLLFPLTALPLDGDQPAD----QAAERMQ----AEQHPLFDQKR---------------------R CCKFP--CPDSCR----YLC-----CG--
CebrOK016_E_037                                         MMSKLGVLLTICLLLFPLTALPLDGDQPAD----QAAERMQ----AEQHPLFDQKR---------------------R CCKFP--CPDSCR----YLC-----CG--
CebrOK033_J_063                                         MMSKLGVLLTICLLLFPLTALPLDGDQPAD----QAAERMQ----AEQHPLFDQKR---------------------R CCKFP--CPDSCR----YLC-----CG--
OK005_J_070                                             -MSKLGVLLTICLLLFPLTALPLDGDQPAD----RPTERMKSDV---EHYLNLQIR---------------------R CCPLR-TCSVNCR-----SC-----CAG-
amadisAYP73021                                          MMSKLRVLLIICLLLFPLTAVPLDGDQPAD----RPAERTQDDISSEHHPMFDAVR---------------------G CCPAL-ACAMGCR-----PC-----CG--
tessulatusAEX60281                                      MMSKLGVLLTMCLLLFPLTAVRLDGDQHAD----RPADRMQ-DIATEQHPLFDPVK---------------------R CCDWP--CTIGCV-----PC-----CLP-
tessulatusAAG60351                                      MMSKLGVLLTICLLLFPLTAVRLDGDQHTD----RPADRMQ-DIATEQHPLFDPVK---------------------R CCDWP--CTIGCV-----PC-----CLP-
striatusAEX60418                                        MMSKLGVLLTVCLLLFPLTALPLDGDQPAD----RPAERMQ-DISSEQHPLFDPVK---------------------R CCELP--CH-GCV-----PC-----CWP-
emaciatusAEX60378                                       MMSKLGVLLTICLLLFPLTALPLDEDQPAD----RPAERMQ-DISSEQHPLFDPVK---------------------R CCELP--CH-GCV-----PC-----CWP-
ventricosusQ9BPJ2                                       MMSKLGALLTICLLLFPLTALPLDGDQPAD----RPAERMQDDISSEQHPLFDKER---------------------Q CCTGS--C-LNCW-----PC-----CG--
consorsCCI55492                                         -MSKLGVLLTICLLLFPLTALPMDGDQSVD----RPAERMQDDISSGQHPLFNQKR---------------------R CCGEGASCPRYFRNSQICSC-----C---
litteratusADZ99310                                      MMSKLGVLLTICLLLFPLTALPMDGDQPVD----RPAERMQGKISSEQHPMFDPIE---------------------G CCTQS--CT-TCF-----PC-----CLI-

CebrOK033_J_064                                         -MSKLGALLIICLLLFSLTAVPLDGDQHAD----QPAERLQDDISSENNPMFNSIRRREQNQCKSFTSVKLLDSRGER CCGPT-ACLAGCK-----PC-----CG--
textileAEX60379                                         MMSKLGALLTICLLLFSLTAVPLDGDQPAD----QPAERLQDDISSEHHPMFNSIRRREQNQFKSFTSVKLLDSRGER CCGPT-ACLAGCK-----PC-----CG--

[Superfamily M-3a]  
[Framework III]
[                                                       /-------Signal--------/---------------------Pro--------------/ /--------CC-----C--------C---CC-----------------------]

CebrOK014_E_033                                         -------V-LFTFLVLFPLATLQLDADQPVK----RYAKNKQD-LNADKRMRLI-LPALRQR Q--------CCA-WEWCDHV-----C--GCCE-----------------------
OK213_E_085                                             ------------------LATLQLDADQPVK----RYAKNKQD-LNADKRMRLI-LPALRQR Q--------CCA-WEWCDHV-----C--GCCE-----------------------
OK005_J_071                                             ------VV-LFVFLMLFPLASLQLDADQPVK----RYAKNKQD-LNADKRMRLI-LPALRQR Q--------CCA-WEWCDHV-----C--GCCE-----------------------
OK006_E_079                                             ------VV-LFIFLVLFPLATLQLDADQPVK----RYAKNKQD-LNADKRMRLI-LPALRQR Q--------CCA-WEWCDHV-----C--GCCE-----------------------
CebrOK016_E_038                                         ---------------------------QPVK----RYAKNKQD-LNADKRMRLI-LPALRQR Q--------CCA-WEWCDHV-----C--GCCE-----------------------
CebrOK033_J_065                                         -MLKIGVV-LFVFLVLFPLATLQLDADQPVK----RYAKNKQD-LNADKRMRLI-LPALRQR Q--------CCA-WEWCDHV-----C--GCCE-----------------------
CebrOK035_J_080                                         -MLKIGVV-LFVFLVLFPLATLQLDADQPVK----RYAKNKQD-LNADKRMRLI-LPALRQR Q--------CCA-WEWCDHV-----C--GCCE-----------------------
OK214_J_077                                             -MLKIGVV-LFVFLVLFPLATLQLDADQPVK----RYAKNKQD-LNADKRMRLI-LPALRQR Q--------CCA-WE----------------------------------------
OK212_J_083                                             -MLKIGVV-LFVFLVLFPLATLQLDADQPVK----RNAKNKQD-LNADKRMRLI-LPALRQR Q--------CCA-WEWCD-------------------------------------
CebrOK033_J_066                                         MMLKMGVV-LFVFLVLFPLATLQLDADQPVE----RDAENKQD-LNADKRMRLI-LPALRQR Q--------CCA-WEWCDHV-----C--GCCE-----------------------
CebrOK033_J_067                                         MMLKLRVV-LFVFLVLFPLATLQLDADQPVE----RDAENKQD-LNADKRMRLI-LPALRQR Q--------CCA-WEWCDHV-----C--GCCE-----------------------
OK212_J_084                                             ------VM-LFTFLVLFPLATLQLDAVQPVE----RDADNKQD-LNADKKMRLI-LPALRQR Q--------CCA-WEWCDHV-----C--GCCE-----------------------
milesAEX60148                                           -MLKMGVV-LFVFLVLFPLATLQLDADQPVE----RYVENKQD-LNADERMGLI-LPALRQQ S--------CCD-IQWCYDN-----C--DCCI-----------------------
OK212_J_085                                             MMLKMGVV-LFVFLVLFPLATLQLDADQPVE----RHVENKQD-LNADERMGLI-LPALRQL S--------CCS-LQWCYES-----C--ECCL-----------------------
OK212_J_086                                             -MLKVGVV-LFVFQVLFPLATLQLDADQPVE----RHVENKQD-LNADERMGLI-LPALRQL S--------CCS-LQWCYES-----C--ECCL-----------------------
CebrOK035_J_081                                         -MLKIGVV-LFVFLVLFPLATLQLDADQPVE----RHVENKQD-LNADERMGLI-LPALRQL S--------CCS-LQWCYES-----C--ECCL-----------------------
OK214_J_078                                             -----------------------------------RHVENKQD-LNADERMGLI-LPALRQL S--------CCS-LQWCYES-----C--ECCL-----------------------
OK005_J_072                                             ----------FVFLVLFPLATLQLDGDQPVE----RHVENKQD-LNADERMGLI-LPALRQL S--------CCS-LQWCYES-----C--ECCL-----------------------
OK193_E_064                                             MMLKLRVV-LFTLLVLVPMATLKLDADQPVE----RYVENIQD-LNPDERREYI-LHALGQK R--------CCQ-KGTCHGA-----C--SCCE-----------------------
OK213_E_086                                             MMLKLRVV-LFTLLVLVPMATLKLDADQPVE----RYAENKQD-LNPDERTGFI-RPAL--R G--------CCP-SSACDFKSG---C--TCCG-----------------------
OK214_J_079                                             MMLKLRVV-LFTLLVLVPMATLKLDADQPVE----RYAENKQD-LNPDERG----------- -------------------------------------------------------
OK193_E_065                                             MMLKLRVV-LFTLLVLVPMATLKLDADQPVE----RYAENKQL-LNPDERRG---------- -------------------------------------------------------

OK193_E_066                                             MMLKLRVV-LFTLLVLVPMATLKLDADQPVE----RYAENKQD-LNPDGKREFI-LPAVG-R T--------CCD-LTWCDGN-----C--RCCTPR---------------------
OK006_E_080                                             MMLKMRAV-LFTFLVLFPLATLQLNADQHVK----RYAENKQD-LNPDGKREFI-LPAVG-R T--------CCD-LTWCNGN-----C--RCCTPR---------------------
SRX1323887_E_059                                        MMLKMGVV-LFVFLVLFPLATFQLNADQHVK----RYAENKQD-LNPDGKREFI-LPAVG-R T--------CCD-LTWCDGN-----C--RCCTPR---------------------
CebrOK014_E_034                                         MMLKMGVV-LFVFLVLFPLATLQLNADQHVK----RYAENKQD-LNPDGKREFI-LPAVG-R T--------CCD-LTWCDGN-----C--RCCTPR---------------------
OK193_E_067                                             -MLKMGVV-LFIFLVLFPLATLQLDADQPVE----RYAENKQD-LNPDGKREFI-LPAVG-R T--------CCD-LTWCDGN-----C--RCCTPR---------------------
CebrOK016_E_039                                         ----MGVV-LFVFLVLFPLATLQLDADQPVE----RYAENKQD-LNPDGKREFI-LPAVG-R T--------CCD-LTWCDGN-----C--RCCTPR---------------------
CebrOK016_E_040                                         MMLKMGVV-LFVFLVLFPLATLQLDADQPVE----RYAENKQD-LNPDGRREFI-LPAVG-R T--------CCD-LTWCDGN-----C--RCCTPR---------------------
ebraeusAEX60111                                         MMLKMRAV-LYVFLVLFPLATLQLDADQPVE----RYAENKQD-LNPDGKREFI-LPAVG-R T--------CCD-LTWCDGN-----C--RCCTPR---------------------
OK213_E_087                                             ---------------------LQLDADQPVE----RYAENKQD-LNPDGRREFI-LPAVG-R T--------CCD-LTWCNGN-----C--RCCTPR---------------------
OK212_J_087                                             MMLKLRVV-LFTLLVLVPMATLKLDAEQPVE----RYAENKQD-LNADERMTLL-L-----E DG-------CCT-RPRCTGA-----C--SCCQD----------------------

OK212_J_088                                             MMLTTRAE-IFVFLVQFPLSTLQLDADQPVE----RYAENKQD-LNPDERRGFI-LPAMR-- G--------CCH-LSACDFGSG---C--TCCI-----------------------
OK212_J_089                                             -MLKMGVV-LFVFLVLFTLATLQLDEDQPVE----RYAENKQD-FNPDERRGFI-LPALR-- G--------CCS-LSACDFGSG---C--ICCS-----------------------
OK212_J_090                                             -MLKMGVV-LFVFLVLFTLATLQLDEDQPVE----RYAENKQD-FNPDERRGFI-LPAMR-- G--------CCH-LSACDFGSG---C--TCCI-----------------------
OK214_J_080                                             MMLKMGVV-LFVFLVLFPLSTLQLDADQPVE----RYAENKQD-LNPDERRGFI-LPAMR-- G--------CCH-LSACDFGSG---C--TCCI-----------------------
OK214_J_081                                             -MLKMGVV-LFVFLVLFPLSTLQLDADQPVE----RYADNKQD-LNPDERRGFI-LPAMR-- G--------CCH-LSACDFGSG---C--TCCI-----------------------
OK005_J_073                                             MMLKLRVV-LFTLLVLVPMATLKLNADQHVE----RYAENKQD-LNPDERRGFI-LPALR-- G--------CCH-FSACDFGSG---C--TCCI-----------------------
OK005_J_074                                             MMLKLRVV-LFVFLVLFPLATLQLNADQHVE----RYAENKQD-LNPDERRGFI-LPALR-- G--------CCH-FSACDFGSG---C--TCCI-----------------------
OK005_J_075                                             MKLKMGVV-LFVFLVLFPLATLQLNADQHVE----RYAENKQD-LNPDERRGFI-LPALR-- G--------CCH-FSACDFGSG---C--TCCI-----------------------
OK005_J_076                                             -MLKMGVV-LFTFLVLFPLATLQLNADQHVE----RYAENKQD-LNPDERRGFI-LPALR-- G--------CCH-FSACDFGSG---C--TCCI-----------------------
OK005_J_077                                             -MLKIGVV-LFVFLVLFPLATLQLNADQHVE----RYAENKQD-LNPDERRGFI-LPALR-- G--------CCH-FSACDFGSG---C--TCCI-----------------------
OK214_J_082                                             -------------LILFPLATLQLDADQPVE----RYAENKQD-FNPDERRGFI-LPALR-- G--------CCS-LSACDFGSG---C--TCCS-----------------------
SRX1323887_E_060                                        MMLKMGVV-LFVFLVLFPLATFQLNADQHVK----RYAENKQD-LNPDERTGFI-RPALR-- E--------CCP-LSACDFRSG---C--TCCS-----------------------
SRX1323887_E_061                                        MMLKMRAV-LFTFLVLFPLATFQLNADQHVK----RYAENKQD-LNPDERTGFI-RPALR-- E--------CCP-LSACDFRSG---C--TCCS-----------------------
CebrOK014_E_035                                         MMLKLRVV-LFILLVLFPLTTLQLDADRPVE----RYAENKQD-LNPDERTGFI-RPALR-- E--------CCP-LSACDFGSG---C--TCCS-----------------------
CebrOK016_E_041                                         MMLKLRVV-LFILLVLFPLTTLQLDADQPVE----RYAENKQD-LNPDERTGFI-RPALR-- E--------CCP-LSACDFGSG---C--TCCS-----------------------
CebrOK016_E_042                                         MMLKMGVV-LFVFLVLFPLATFQLDADQPVE----RYAENKQD-LNPDERTGFI-RPALR-- E--------CCP-LSACDFGSG---C--TCCS-----------------------
CebrOK014_E_036                                         -MLKMGVVMLFTFLVLFPLATFQLDADRPVE----RYAENKQD-LNPDERTGFI-RPALR-- E--------CCP-LSACDFGSG---C--TCCS-----------------------
OK214_J_083                                             MMLKLRVV-LFISLILFPLSTLQLDADQPVE----RYAENKQD-FNPDERRG---------- -------------------------------------------------------
OK213_E_088                                             MMLKMGVV-LFVFLVLFPLATLQLNADQHVK----RYAENKQD-LNPDERRGFK-LSALR-- G--------CCP-SSVCDLRSG---C--TCCA-----------------------
OK006_E_081                                             MMLKMGVV-LFVFLVLFPLATLQLNADQHVK----RYAENKQD-LNPDERKG---------- -------------------------------------------------------

SRX1323887_E_062                                        MMLKMGVV-LFVFLVLFPLATFQLNADQHVK----RYAENKQD-LNPDERKGLV-SLDLR-L P--------CCY-IGWCSRR-----C--NCGGYRP--------------------
OK006_E_082                                             MMLKMRAV-LFTFLVLFPLATLQLNADQHVK----RYAENKQD-LNPDERKGLV-SLDLR-L P--------CCD-VGWCSRR-----C--NCDVYRP--------------------
OK193_E_068                                             MMLKMGVV-LFVFLVLFPLATLQLNADQHVK----RYAENKQD-LNPDERKGLV-SLDLR-L P--------CCD-VGWCSKR-----C--NCDVYRP--------------------
CebrOK014_E_037                                         MMLKMGVV-LFVFLVLFPLATLQLNADQHVK----RYAENKQD-LNPDERKGLV-SLDLR-L P--------CCD-VGWCSRR-----C--NCDVYRP--------------------
CebrOK016_E_043                                         ---------LFVFLVLFPLATLQLNADQHVK----RYAENKQD-LNPDERKGLV-SLDLR-L P--------CCD-VGWCSRR-----C--NCDVYRP--------------------
OK213_E_089                                             MMLKMGVV-LFVFLVLFPLSTLQLDADQPVE----RNAENKQD-LNPDERKGLV-SLDLR-L P--------CCD-VGWCSRR-----C--NCDVYRP--------------------
OK213_E_090                                             MMLKLSVV-LFVFLVLFPLATLQLDADQPVE----RNAENKQD-LNPDERKGLV-SLDLR-L P--------CCD-VGWCSRR-----C--NCDVYRP--------------------
OK213_E_091                                             MMLKMRAV-LFTFLVLFPLATLQLDADQPVE----RDAENKQD--NPDERKGLV-SLDLR-L P--------CCD-VGWCSRR-----C--NCDVYRP--------------------
OK213_E_092                                             MMLKMGVV-LFVFLVLFPLATLQLNADQHVK----RYAENKQD-LNPDERTGFI-LSAQKQK R--------CCT-F-----------------------------------------

OK212_J_091                                             MMLTTRAE-IFVFLVQFPLSTLQLDADQPVE----RYAENKQD-LNPDERRGFV-SLARR-R P--------CCS-LRWCSKY-----C--HCGI-----------------------
CebrOK033_J_068                                         -MLKIGVV-LFVFLVLFPLATLQLDADQPVE----RYAENKQD-LNPDERRGFV-SLARR-R P--------CCS-LRWCSKY-----C--HCGI-----------------------
CebrOK033_J_069                                         MMLKMGVV-LFTFLVLFPLATLQLDADQPVE----RYAENKQD-LNPDERRGFV-SLARR-R P--------CCS-LRWCSKY-----C--HCGI-----------------------
CebrOK033_J_070                                         MMLKMGVV-LFVFLVLFPLATLQLDADQPVE----RYAENKQD-LNPDERRGFV-SLARR-R P--------CCS-LRWCSKY-----C--HCGI-----------------------
CebrOK035_J_082                                         MMLKMGVV-LFVFLVLFPLSTLQLDADQPVE----RYADNKQD-LNPDERRGFV-SLARR-R P--------CCS-LRWCSKY-----C--HCGI-----------------------
CebrOK035_J_083                                         MMLKLRVV-LFTLLVLFPMSTLQLDADQPVE----RYADNKQD-LNPDERRGFV-SLARR-R P--------CCS-LRWCSKY-----C--HCGI-----------------------
CebrOK035_J_084                                         MMLKLRVV-LFILLVLFPLTTLQLDADQPVE----RYADNKQD-LNPDERRGFV-SLARR-R P--------CCS-LRWCSKY-----C--HCGI-----------------------
OK214_J_084                                             --------------------TLQLDADQPVE----RYADNKQD-LNPDERRGFV-SLARR-R P--------CCS-LRWCSKY-----C--HCGI-----------------------
OK005_J_078                                             ------------FLVLFPLATLQLDADQPVE----RYADNKQD-LNPDERRGFV-SLARR-R P--------CCS-LRWCSKY-----C--RCGI-----------------------
OK212_J_092                                             -MLKMGVV-LFVFLVLFTLATLQLDEDQPVE----RYAENKQD-FNPDERRGFV-SLARR-R P--------CCS-LRWCSKY-----C--HCGI-----------------------
OK006_E_083                                             MMLKMRAV-LFTFLVLFPLATLQLNADQHVK----RYAENKQD-LNPDERKGFV-SLALR-R P--------CCS-LRWCSNY-----C--RCGI-----------------------
OK193_E_069                                             MMLKLRVV-LFILLVLFPMATLQLDADQPVE----RDAENKQD--NPDERKGFV-SLALR-R P--------CCS-LRWCSNY-----C--RCGI-----------------------
ebraeusAEX60043                                         MMLKLRVV-LFILLVLFPLATLQLDADQPVE----RDAENKQD--NPDERKGFV-SLALR-R P--------CCS-LRWCSNY-----C--RCGI-----------------------
ebraeusAFQ98156                                         ----------FVFLVLFPLATLQLDADQPVE----RDAENKQD--NPDERKGFV-SPALR-R P--------CCS-LRWCSNY-----C--RCGI-----------------------
ebraeusAFQ98173                                         ----------FVFLVLFPLATLQLDADQPVE----RDAENKQD--NPDERKGFV-SLALR-R P--------CCS-LRWCSNY-----C--RCGI-----------------------
OK213_E_093                                             MMLKMGVV-LFVFLVLFPLSTLQLDADQPVE----RDAENKQD--NPDERKGFV-SLALR-R P--------CCS-LRWCSNY-----C--RCGI-----------------------
OK193_E_070                                             MMLKMGVV-LFVFLVLFPLATLQLDADQPVE----RDAENKQD--NPDERKGFV-SLALR-R P--------CCS-LRWCSNY-----C--RCGI-----------------------
OK213_E_094                                             MMLKLSVV-LFVFLVLFPLATLQLDADQPVE----RDAENKQD--NPDERKGFV-SLALR-R P--------CCS-LRWCSNY-----C--RCGI-----------------------
CebrOK016_E_044                                         ----MGVV-LFVFLVLFPLATLQLDADQPVE----RDAENKQD--NPDERKGFV-SLALR-R P--------CCS-LRWCSNY-----C--RCGI-----------------------
OK193_E_071                                             MMLKMRAV-LFTFLVLFPLATLQLDADQPVE----RDAENKQD--NPDERKGFV-SLALR-R P--------CCS-LRWCSNY-----C--RCGI-----------------------
SRX1323887_E_063                                        MMLKMGVV-LFVFLVLFPLATFQLNADQHVK----RDAENKQD--NPDERKGFV-SLALR-R P--------CCS-LRWCSNY-----C--RCGI-----------------------
CebrOK014_E_038                                         MMLKMGVV-LFVFLVLFPLATLQLNADQHVK----RDAENKQD--NPDERKGFV-SLALR-R P--------CCS-LRWCSNY-----C--RCGI-----------------------
OK006_E_084                                             MMLKMGVV-LFVFLVLFPLATLQLDADQPVE----RDAENKQD--NPDERKGFV-------- -------------------------------------------------------
OK193_E_072                                             -MLKMGVV-LFIFLVLFPLATLQLDADQPVE----RDAENKQD--NPDERKGFV-SLALR-R P--------CCS-LR----------------------------------------

OK006_E_085                                             MMLKLRVV-LFTLLVLVPMATLKLNADQHVK----RYAENKQD-LNPDERRGFK-LSALR-- G--------CCP-SSVCDLRSG---C--TCCA-----------------------
OK193_E_073                                             ------------------------------------------D-LNPDERRGFK-LSALR-- G--------CCP-LSACDFGSG---C--TCCA-----------------------
OK193_E_074                                             ------------------------------------------D-LNPDERRGFK-LSALR-- G--------CCP-SSACDFRSG---C--TCCA-----------------------
OK213_E_095                                             ---------------------LQLDADQPVE----RYAENKQD-LNPDERRGFK-LSALR-- G--------CCP-SSVCDLRSG---C--TCCA-----------------------
OK213_E_096                                             MMLKMGVV-LFVFLVLFPLATLQLNADQHVK----RYAENKQD-LNPDEWRGFI-LPALQ-K R--------CCK-APWCRTP-----C--ACCE-----------------------
OK193_E_075                                             --------------------------DQPVE----RYVENKQD-LNPDEWRGFI-LPALQ-K R--------CCK-APWCRTP-----C--ACCE-----------------------
OK214_J_085                                             ----MGVV-LFVFLVLFPLATLQLNADQHVE----RYAENKQD-LNPDERRGFI-LPALQ-K R--------CCT-PPWCRVP-----C--ACCE-----------------------
CebrOK033_J_071                                         MMLKMGVV-LFTFLVLFPLATLQLDADQPVE----RYAENKQD-LNPDERRGFI-LPALQ-K R--------CCT-PPWCRVP-----C--ACCE-----------------------
CebrOK033_J_072                                         -MLKIGVV-LFVFLVLFPLATLQLDADQPVE----RYAENKQD-LNPDERRGFI-LPALQ-K R--------CCT-PPWCRVP-----C--ACCE-----------------------
OK212_J_093                                             -------------LVLFHLSTLQLDADQPVE----RYVENKQD-LNPDERRGFI-LPALQ-K R--------CCT-PPWCRVP-----C--ACCE-----------------------
CebrOK035_J_085                                         -MLKTGVL-LLIFLVLFPLATLQLDADQPVE----RYVGNKQD-LNPDERRGFI-FPALQ-K R--------CCT-PPWCRVP-----C--ACCE-----------------------
OK005_J_079                                             MMLRMGVL-LFVFLVLFPLATLQLDADQPVE----RYAENKQL-LSPDERREII-LHALG-T R--------CCS-WDVCDHPS----C--TCCSG----------------------
CebrOK014_E_039                                         MMLKMGVV-LFVFLVLFPLATLQLNADQHVK----RYAENKQL-LSPDERREII-LHALG-T R--------CCS-WDVCDHPS----C--TCCG-----------------------
CebrOK014_E_040                                         -MLKMGVV-LFIFLVLFPLATLQLDADQPVE----RYAENKQL-LSPDERREII-LHALG-T R--------CCS-WDVCDHPS----C--TCCG-----------------------
CebrOK016_E_045                                         -MLKMGVV-LFIFLVLFPLATLQLDADQPVE----RYAENKQL-LSPDERREII-LHALG-T R--------CCS-WDVCDHPS----C--TCCG-----------------------
OK005_J_080                                             -MLKMGVV-LFIVLVLFPLATLQLDADKPVE----RYAENKQL-LNPDERRGII-LHALG-Q RV-------CCS-FGSCDSL-----C--QCCDG----------------------
OK193_E_076                                             -MLKMGVV-LFIFLVLFPLATLQLDADQPVE----RYAENKQL-LNPDERRG---------- -------------------------------------------------------
OK213_E_097                                             -MLKMGVV-LFIFLVLFPLATLQLDADKPVE----RYAENKQL-LNPDERRGII-L------ -------------------------------------------------------
OK005_J_081                                             -MLKMGVV-LFIVLVLFPLATLQLDADKPVE----RYAENKQL-LNPDERRGII-LHALR-K R--------CCH-SSWCKHL-----C-----------------------------
OK005_J_082                                             -MLKMGVV-LFIVLVLFPLATLQLDADKPVE----RYAENKQL-LNPDERRGIL-LPALR-Q RV-------CCP-FGGCHEL-----C--QCCEG----------------------
CebrOK014_E_041                                         MMLKMGVV-LFVFLVLFPLATLQLDADQPVE----RYAENKQL-LNPDERREIL-LPALR-K F--------CCD-SNWCHIS-----------------------------------
CebrOK016_E_046                                         -MLKMGVV-LFIFLVLFPLATLQLDADQPVE----RYAENKQL-LNPDERREIL-LPALR-K F--------CCD-SNWCHISD----C--ECCYG----------------------
CebrOK035_J_086                                         ----------------FPLATLQLDADQPVE----RYTENKQL-LNPDERRGII-LHALR-K R--------CCH-SSWCKTE-----C-----------------------------
OK214_J_086                                             -MLKMGVV-LFIFLVLFPLATLQLDADQPVE----RYAKNKQL-LNPHKRRGII-LRAPG-K R--------CCD-WENCDHL-----C--SCCGG----------------------
OK212_J_094                                             MMLKMGVV-LFIFLVLFPLATLQLDADQPVE----RYAKNKQL-LNPHKRRGII-LRAPG-K R--------CCD-WENCDHL-----C--SCCGG----------------------
OK006_E_086                                             -----------IFLVLFPLATLQLDADQPVE----RYAKNKQL-LNPHKRRGII-LRAPG-K R--------CCD-WENCDHL-----C--SCCGG----------------------
OK005_J_083                                             MMLRMGVL-LFVFLVLFPLATLQLDADQPVE----RYAKNKQL-FNPHKRRGII-LRAPG-K R--------CCH-WNWCDHL-----C--SCCGS----------------------
OK213_E_098                                             -MLKMGVV-LFIFLVLFPLATLQLDADQPVE----RYAKNKQL-FNPHKRRGII-LRAPG-K R--------CCH-WNWCDHL-----C--SCCGS----------------------

OK212_J_095                                             MMLTTRAE-IFVFLVQFPLSTLQLDADQPVE----RYAENKQD-LNPDERRNFM-MHIVR-R ---------CCT-P--CKIPP----C--QCCM-----------------------
OK006_E_087                                             -MLKLSVV-LFILLVLFPLPTLQLDADQPVE----RYAENKQD-LNPDERRNFM-MHIVR-R ---------CCT-P--CKIPP----C--QCCM-----------------------
OK005_J_084                                             -MLKMGVV-LFIVLVLFPLATLQLDADQPVE----RYAENKQD-LNPDERRNFM-MHIVR-R ---------CCT-P--CKIPP----C--QCCM-----------------------
OK214_J_087                                             MMLKMGVV-LFTFLVLFPLSTLQLDADQPVE----RYAENKQD-LNPDERRNFM-MHIVR-R ---------CCT-P--CKIPP----C--QCCM-----------------------
CebrOK033_J_073                                         -MLKIGVV-LFVFLVLFPLATLQLDADQPVE----RYAENKQD-LNPDERRNFM-MHIVR-G ---------CCR-P--CHIPP----C--QCCM-----------------------
CebrOK033_J_074                                         MMLKMGVV-LFTFLVLFPLATLQLDADQPVE----RYAENKQD-LNPDERRNFM-MHIVR-G ---------CCR-P--CHIPP----C--QCCM-----------------------
CebrOK014_E_042                                         -------V-LFTFLVLFPLATLQLDADQPVE----RYAENKQD-LNPDERRNFM-VHIVR-E ---------CCR-A--CNIPP----C--QCCM-----------------------
tessulatusAEX60174                                      -MLKMGVV-LFTFLVLFPLATLQLDADQPVE----RYAENKQG-LNPDERREFM-LPIVR-G ---------CCT-A--CRMPP----C--TCCW-----------------------
ermineusAXL95462                                        -MLKMGVL-LFIFLVLFPLATLQLDADQPVE----RYAENKQN-LNPDERRDFM-LPIVG-R ---------CCT-A--CNMPP----C--QCCA-----------------------
OK193_E_077                                             -MLKMGVVMLFTFLVLFPLATLQLDADQPVE----RHAENKQL-LNPDERR----------- -------------------------------------------------------
OK005_J_085                                             MMLRMGVV-LFTFLLLFPLATLQLDSDQPVK----RYAKNKQD-LNA--------------- -------------------------------------------------------
OK193_E_078                                             MMLKMGVM-LFVFLDLFPLATLQLDADQPVD----RYVENKQ-------------------- -------------------------------------------------------

OK006_E_088                                             MMLKMRAV-LFTFLVLFPLATLQLNADQHVK----RYAENKQDLLHPDERTGFM-LSAVG-R R--------CCR-LRLCKTH-----C--HCCVYRP--------------------
OK006_E_089                                             MMLKMRAV-LFTFLVLFPLATLQLNADQHVK----RYAENKQDLLHPNERTGFI-LPAQR-R R--------CCS-LRRCKPH-----C--HCCVYRP--------------------
OK005_J_086                                             ----------------------QLNADQHVE----RYAENKQD-LNPDERTGFI-LPAQR-R R--------CCS-LRRCKPH-----C--HCCVYRP--------------------
OK212_J_096                                             -MLKMGVV-LFVFLVLFTLATLQLDEDQPVE----RYAENKQD-FNPDERRGFI-LPALR-R R--------CCS-LQRCKPH-----C--RCCVQRH--------------------
OK213_E_099                                             MMLKLRVV-LFILLVLFPLTTLQLDADQPVE----RYAENKQD-LHPNERTGFI-LPAMR-R R--------CCS-LRRCEPH-----C--HCCVQRH--------------------
OK213_E_100                                             MMLKMGVV-LFVFLVLFPLSTLQLDADQPVE----RYAENKQD-LHPNERTGFI-LPAMR-R R--------CCS-LRRCEPH-----C--HCCVQRH--------------------
ebraeusAEX60109                                         MMLKMGVV-LFVFLVLFPLATLQLDADQPVE----RDAENKQD-LHPDERTGFM-LSAVG-R R--------CCS-LRRCEPH-----C--HCCVQRH--------------------
CebrOK016_E_047                                         ----MGVV-LFVFLVLFPLATLQLDADQPVE----RDVENKQD-LHPDERTGFM-LSAVG-R R--------CCS-LRRCEPH-----C--HCCVQRH--------------------
SRX1323887_E_064                                        MMLKMGVV-LFVFLVLFPLATFQLNADQHVK----RDAENKQD-LHPDERTGFM-LSAVG-R R--------CCS-HRRCTVN-----C--HCCRH----------------------
SRX1323887_E_065                                        MMLKMRAV-LFTFLVLFPLATFQLNADQHVK----RDAENKQD-LHPDERTGFM-LSAVG-R R--------CCS-HRRCTVN-----C--HCCRH----------------------
CebrOK014_E_043                                         MMLKLRVV-LFILLVLFPLTTLQLDADRPVE----RDAENKQD-LHPDERTGFM-LSAVG-R R--------CCS-HRRCTVN-----C--HCCRH----------------------
CebrOK014_E_044                                         MMLKMGVV-LFVFLVLFPLATLQLDADRPVE----RDAENKQD-LHPDERTGFM-LSAVG-R R--------CCS-HRRCTVN-----C--HCCRH----------------------
OK213_E_101                                             MMLKMGEV-LFVFLVLFPLATLQLNADQHVK----RYAENKQA-LHPNERKGFI-LPAMS-R R--------CCS-LRRGEPH-----C--HCCGQRH--------------------
OK213_E_102                                             MMLKMGVV-LFVFLVLSPLATLQLDADQPVE----REAENKQD-LHSDERTGFI-LPAQK-- -------------------------------------------------------

tessulatusAEX60060                                      -MLKMGVL-LFTFLVLFPLATLQLDADQPVE----RYAENKQD-LNPDERMKFI-LHALGQR R--------CCI-SPACNDT-----C--YCCQDR---------------------
planorbisAEX60056                                       MMLKMGVV-LFTFLVLFPLATLQLDADQPVE----RYAENKQG-LNPDERMKFI-LHALGQR R--------CCI-SPACNDT-----C--YCCQDR---------------------
CebrOK035_J_087                                         -----------VFLVLFPLATLQLDADQHVK----RYAENKQD-LNPDERMEFI-LHALGQR R--------CCI-SPACDS------C--YCCL-----------------------
OK212_J_097                                             -----------IFLVLFPLATLQLDADQPVE----RYAENKQD-LNPDERMEFI-LHALGQR R--------CCI-SPACDS------C--YCCL-----------------------
OK214_J_088                                             -------------------ATLQMAADQPVE----RYAENKQD-LNPDERMEFI-LHALGQR R--------CCI-SPACDS------C--YCCL-----------------------
CebrOK035_J_088                                         -----------VFLVLFPLATLQLDADQPVE----RYAENKQD-LNPDERMEFI-LHALGQR R--------CCI-WSGCYDS-----C--YCCQ-----------------------
OK212_J_098                                             -MLKMGVL-LFTFLVLLPLAMFQLDADQPVE----RYAENKQD-LNPDERRGCI-LPAL--- -------------------------------------------------------
CebrOK035_J_089                                         MMLKLRVV-LFTLLVLFPMAMLTLDADQPVE----RYVENKHD-LNPDERRGFI-SLALR-R T--------CCD-IRWCNGN-----C--RCCSPK---------------------
OK213_E_103                                             MMLKMGVV-LFTFLALLPLATLQLDADQPVE----RYAENKRE-LNPDEMKAFI-LPVLR-K Q--------CCE-GK-CSQSQ----C--FCCQ-----------------------
SRX1323887_E_066                                        -MLKMGVVMLFTFLVLFPLATFQLDADQPAD----RDAENKQD-LNPDGKREFI-LPAVG-R T--------CCD-LTWCDGN-----C--RCCTPR---------------------
CebrOK035_J_090                                         -MLKTGVL-LLIFLVLFPLATLQLDADQPVE----RYVGNKQD-LNPDERRGFR-WLAQR-R T--------CCD-QIECDGN-----C--HCCSPG---------------------
CebrOK035_J_091                                         -MLKTGVL-LLIFLVLFPLATLQLDADQPVE----RYVGNKQD-LNPDERRGFI-SPALRRR R--------CCT-WRECDGN-----C--HCCQR----------------------
striatusAEX60162                                        -MLKMGVV-LFTFQVLFPLATLQLDADQPVE----RHAENKQD-LIPDERRGIL-LHALKQR V--------WCD-WEWCYGD-----C--HCFD-----------------------
OK006_E_090                                             MMLKLRVV-LFIFLVLFPLATLQLDAGQPVA----RYAKNKQD-LNPNKRRRFI-LRAMR-Q K--------CCE-WKVCEVQ-----C--GCCY-----------------------
OK213_E_104                                             MMLKLRVV-LFIFLVLFPLATLQLDAGQPVA----RYAKNKQD-LNPNKRRRFI-LRAMR-Q K--------CCE-WKVCEVQ-----C--GCCY-----------------------
OK193_E_079                                             MMLKLRVV-LFIFLVLFPLATLQLDAGQPVA----RYAKNKQD-LNPNKRRRFI-LRAMR-Q K--------CCE-WKVCEVQ-----C--GCCH-----------------------
CebrOK016_E_048                                         ---------------LFPLATLQLDAGQPVA----RYAKNKQD-LNPNKRRRFI-LRAMR-Q K--------CCE-WKVCEVQ-----C--GCCY-----------------------
OK193_E_080                                             MMLKLRVV-LFIFLVLFPLATLQLDAGQPVA----RYAKNKQD-LNPNKRRRFI-LPAMR-Q I--------CCK-LKACRPE-----C--GCCM-----------------------

OK212_J_099                                             MMLTTRAE-IFVFLVQFPLSTLQLDADQPVE----RYAENKQD-LNPDERAGLV-SLDLR-L P--------CCY-IEWCSRR-----C--ICNPLEP--------------------
CebrOK035_J_092                                         -------------------------ADQPVE----RYAENKQD-LNTDERAGLV-SLDLR-L P--------CCY-IEWCSRR-----C--ICDPLEP--------------------
CebrOK033_J_075                                         -MLKIGVV-LFVFLVLFPLATLQLNADQHVE----RYAENKQD-LNPDERAGLV-SLDLR-L P--------CCY-IEWCSRR-----C--ICNPLEP--------------------
OK005_J_087                                             ----------------------QLNADQHVE----RYAENKQD-LNPDERAGLV-SLDLR-L P--------CCY-IEWCSRR-----C--LCNPLEP--------------------

SRX1323887_E_067                                        MMLKMRAV-LFTFLVLFPLATFQLNADQHVK----RDAENKQD-LHPNERTGFI-LPAMRRQ G--------CCI-EPLCYQYD----C--DCCRYL---------------------
SRX1323887_E_068                                        MMLKMGVV-LFVFLVLFPLATFQLNADQHVK----RDAENKQD-LHPNERTGFI-LPAMRRQ G--------CCI-EPLCYQYD----C--DCCRYL---------------------
OK193_E_081                                             ------------------------NADQHVK----RYAENKQD-LHPNERTGFI-LPAMRRQ G--------CCI-EPLCYQYD----C--DCCRHL---------------------
OK193_E_082                                             -------------LVLFPQATLQLDADQPVE----RDAENKQD-LHPDERTGFM-LSAVGRQ G--------CCI-EPLCYQYD----C--DCCRHL---------------------

CebrOK016_E_049                                         ----MGVV-LFVFLVLFPLATLQLDADQPVE----RDVENKQD-LHPDERTGFI-LPAQKQK R--------CCK-YPLCAAG-----C--SCCTT----------------------
OK193_E_083                                             -------------LVLFPQATLQLDADQPVE----RDAENKQD-LHPDERTGFI-LSAQKQK R--------CCK-YPLCAAG-----C--SCCRT----------------------
OK213_E_105                                             ---------------------------QPVE----RYVENKQD-LNPDERTGFI-LPAQKQK R--------CCK-YPLCAAG-----C--SCCKT----------------------
CebrOK016_E_050                                         -----------------------------VE----RYAENKQD-LNPDERTGFI-LPAQKQK R--------CCK-YPLCAAG-----C--SCCTT----------------------
CebrOK033_J_076                                         ------------FLVLFPLATLQLDADQPVE----RHVENKQD-LNPDERGGFI-SPALGQK R--------CCN-APLCAAG-----C--SCCE-----------------------
CebrOK035_J_093                                         ------------------------DADQPVE----RYVENKQD-LNPDERGGFI-SPALGQK R--------CCN-APLCAAG-----C--SCCE-----------------------
OK212_J_100                                             -------------LVLFHLSTLQLDADQPVE----RYVENKQD-LNPDERGGFI-SPALGQK R--------CCN-APLCAAG-----C--SCCE-----------------------
OK193_E_084                                             --------------------------DQPVE----RYVENKQD-LNPDERGGFI-SPVLGQK R--------CCN-APLCAAG-----C--SCCE-----------------------
OK214_J_089                                             ----VGVV-LFVFLVLFPLATLQLDADPPVE----RYVENKQD-LNPDERGGFI-SPALGQK R--------CCN-APLCAAG-----C--SCCE-----------------------
OK006_E_091                                             --------------------------DQPVE----RYVENKQD-LNPDERTGFI-LSAQKQK R--------CCT-FPVCTA------C--YCCRMHPQHP-----------------
OK193_E_085                                             -------------------------ADQPVE----RYVENKQD-LNPDERTGFI-LSAQKQK R--------CCT-FPLCATC-----S--SCCRMHPQHP-----------------
CebrOK035_J_094                                         -------V-LFTLLVLVPMATLKLDADQPVE----RYAENKQD-LNPDERRRFIILPALKQK R--------CCE-PPHCHGA-----C--SCCE-----------------------

OK212_J_101                                             MMLKMEAA-LFVFLVLFPLASLQLDADQPVK----RNAKNKQD-LNADDRMTLL-L----ED G--------CCT-RPRCTGA-----C--SCCQD----------------------
OK214_J_090                                             -MLKMGVV-LFIVLVLFPLAMLQLDADQSVK----RYAKNKQD-LNAAERMTLL-L----ED G--------CCT-RPRCTGA-----C--SCCQD----------------------
OK212_J_102                                             -MLKMGVV-LFIFLVLFPLATLQLDADQPVK----RYAKNKQD-LNADERMTLL-L----ED G--------CCT-RPRCTGA-----C--SCCQD----------------------
OK212_J_103                                             -MLKIGVV-LFVFLVLFPLATLQLDADQPVK----RYAKNKQD-LNADERMTLL-L----ED G--------CCT-RPRCTGA-----C--SCCQD----------------------
OK006_E_092                                             MMLKMGVV-LFVFLVLFPLSTLQLDADQPVE----RDAENKQD-LNADERMTLL-L----ED G--------CCT-RPRCTGA-----C--SCCQD----------------------
OK214_J_091                                             MMLKMGVV-LFVFLVLFPLSTLQLDADQPVE----RDAENKQD-LNADERMTLL-L----ED G--------CCT-RPRCTGA-----C--SCCQD----------------------
CebrOK035_J_095                                         MMLKMGVV-LFVFLVLFPLSTLQLDADQPVE----RDAENKQD-LNADERMTLL-L----ED G--------CCT-RPRCTGA-----C--SCCQD----------------------
CebrOK033_J_077                                         MMLKMGVV-LFVFLVLFPLATLQLDADQPVE----RDAENKQD-LNADERMTLL-L----ED G--------CCT-RPRCTGA-----C--SCCQD----------------------
OK214_J_092                                             MMLKMGVV-LFTFLVLFPLSTLQLDADQPVE----RDAENKQD-LNADERMTLL-L----ED G--------CCT-RPRCTGA-----C--SCCQD----------------------
OK006_E_093                                             MMLKMGVV-LFVFLVLFPLSTLQLDADQPVE----RDAENKQD-LNADERMTLL-LYALGED G--------CCT-RPRCTGA-----C--SCCQD----------------------
CebrOK035_J_096                                         MMLKMGVV-LFVFLVLFPLSTLQLDADQPVE----RDAENKQD-LNADERMTLL-LYALGED G--------CCT-RPRCTGA-----C--SCCQD----------------------
OK212_J_104                                             -MLKMGVV-LFVFLVLFPLATLQLDADQPVE----RDAENKQD-LNADERMTLL-L----ED G--------CCT-RPRCTGA-----C--SCCQD----------------------
OK212_J_105                                             -MLKIGVV-LFVFLVLFPLATLQLDADQPVE----RDAENKQD-LNADERMTLL-L----ED G--------CCT-RPRCTGA-----C--SCCQD----------------------
OK212_J_106                                             MMLKLRVV-LFVFLVLFPLATLQLDADQPVE----RDAENKQD-LNADERMTLL-L----ED G--------CCT-RPRCTGA-----C--SCCQD----------------------
OK213_E_106                                             MMLKMGVV-LFTFLALLPLATLQLDADQPVE----RDAENKQD-LNADERMTLL-L----ED G--------CCT-RPRCTGA-----C--SCCQD----------------------
OK213_E_107                                             MMLKMGVV-LFTFLALLPLATLQLDADQPVE----RDAENKQD-LNADERMTLL-LYALGED G--------CCT-RPRCTGA-----C--SCCQD----------------------
OK212_J_107                                             MMLKKGVE-LFVFLVLFPLATLQLDADQPVE----RDAENKQD-LNADERMTLL-LYALGED G--------CCT-RPRCTGA-----C--SCCQD----------------------
OK212_J_108                                             MMLKKGVE-LFVFLVLFPLATLQLDADQPVE----RDAENKQD-LNADERMTLL-L----ED G--------CCT-RPRCTGA-----C--SCCQD----------------------
OK212_J_109                                             MMLKKGVE-LFVFLVLFPLATLQLDADQPVK----RYAKNKQD-LNADERMTLL-L----ED G--------CCT-RPRCTGA-----C--SCCQD----------------------
OK212_J_110                                             --------------------------DQPVE----RDAENKQD-LNADERMTVL-L----ED G--------CCT-RPRCTGA-----C--SCCQD----------------------
OK212_J_111                                             -MLKMGVV-LFVFLVLFPLSTLQLDADQPVA----RDAENKQD-LNAHERMTLL-LYALGED G--------CCT-RPRCTGA-----C--SCCQD----------------------
OK212_J_112                                             -MLKMGVV-LFVFLVLFPLSTLQLDADQPVD----RDAENKQD-LNAHERMTLL-LYALGED G--------CCT-RPRCTGA-----C--SCCQD----------------------
OK212_J_113                                             -MLKMGVV-LFVFLVLFPLSTLQLDADQPVE----RDADNKQD-LNADKRMTLL-LYALGED G--------CCT-RPRCTGA-----C--SCCQD----------------------
OK005_J_088                                             -MLKIGVV-LFVFLVLFPLATLQLNADQHVE----RYAENKQD-LNADERMTLL-LYALGED G--------CCT-RPRCTGA-----C--SCCQD----------------------
OK005_J_089                                             -MLKIGVV-LFVFLVLFPLATLQLNADQHVE----RYAENKQD-LNADERMTLL-L----ED G--------CCT-RPRCTGA-----C--SCCQD----------------------
OK005_J_090                                             MKLKMGVV-LFVFLVLFPLATLQLNADQHVE----RYAENKQD-LNADERMTLL-L----ED G--------CCT-RPRCTGA-----C--SCCQD----------------------
OK212_J_114                                             -MLKMGVV-LFVFLVLFPLSTLQLDADQPVA----RDAENKQD-FNADERMTSL-L----ED G--------CCT-RPRCTGA-----C--SCCQD----------------------
OK214_J_093                                             MVLKMGGV-LFVFLVLFHLSTLQLDADQPVE----RDAENKQD-LNADERMTLL-LYALGED G--------CCT-RPRCTGA-----C--SCCQD----------------------
OK005_J_091                                             ----------------------------PVE----RDAENKQD-LNADERMTLI-LYALGKD G--------CCT-RPRCTGA-----C--SCCQD----------------------
OK005_J_092                                             ----------------------------PVE----RDAENKQD-LNADERMTLI-L----KD G--------CCT-RPRCTGA-----C--SCCQD----------------------
OK212_J_115                                             -MLKLGVV-LFGFLVLFPLSTLQLDADQSVE----RDVENKQD-LNADERMTLL-L----ED G--------CCT-RPRCTGS-----C--SCCQD----------------------
OK214_J_094                                             -MLKIGVV-LIVFLVLFPLATLQLDADQPVE----RHVENKQD-LNADERMTLL-LYAVGED G--------CCT-RARCTGA-----C--SCCQD----------------------
OK212_J_116                                             ----------------FPLSTLQLDADQPVE----RAAENKQY-LNADERMTLL-M----ED G--------CCT-RPRCTGA-----C--SCCQD----------------------
OK214_J_095                                             -MLKMGVV-LFVLLNLFPLTTLQLEADQPVE----RDSENKQD-LNAEERMTLL-L----ED G--------CCT-RPRFTGA-----C--SCCQD----------------------
OK214_J_096                                             ---------------------LQLDADQPVE----RDAENKQD-LHADERMTLL-F----ED G--------CCT-RPRCSGG-----C--SCCQD----------------------
OK214_J_097                                             --MKMRVV-LFVFLVLFPLSTLQLDADEPVE----RDAENKQD-LNADERMTLL-LYALGED G--------CCI-CPRCTGA-----C--SCCQD----------------------

CebrOK035_J_097                                         -------L-LSVLLVLLPMATLQLDADQPVE----RYVENKQD-LNPDERTGFI-LPALG-K R--------CCF-TMLCPTT-----C--D--------------------------
CebrOK035_J_098                                         --------------VLFPMAMLKLDADQPVE----RYAENKQD-LNPDERKRFV-LLAVRQR Q--------CCV-PAMCDRPE----C--SCCG-----------------------
OK214_J_098                                             ----MGVV-LFVFLVLFPLATLQLNADQHVE----RYAENKQD-LNPDERRGFI-LPALRQG Q--------CCPFRDYIMQD-----C--DCHF-----------------------
OK214_J_099                                             -------------LILFPLATLQLDADQPVE----RYAENKQD-FNPDERRGFI-LPALRQG Q--------CCPFRDYIMQD-----C--DCHF-----------------------
CebrOK014_E_045                                         -------V-LFTFLVLFPLATLQLNADRPVK----RYAANKRD-PNPDEKREMI-LHVLGQR L--------CCW-SEVCHAR-----C--KCCG-----------------------
CebrOK016_E_051                                         ----------FTFLVLFPLATLQLNADRPVK----RYAANKRD-PNPDEKREMI-LHVLGQR L--------CCW-SEMCHAR-----C--KCCG-----------------------
CebrOK033_J_078                                         ----------------FPLATLQLNADRPVK----RYAANKRD-PNPDEKREMI-LHVLGQR L--------CCW-SEMCHAR-----C--KCCG-----------------------
OK212_J_117                                             -------D-LFIFLVLFPLATLQLDADQPVG----RYAENKQD-LNPDERREYI-LHVLGQR G--------CCE-NVYCSIN-----C--SCCK-----------------------
CebrOK016_E_052                                         --------------------TLHLDADQPVE----RYAENKQL-LNTDERREII-LSALR-R Q--------CCD-RNSCEFPK----C--LCCNG----------------------
OK213_E_108                                             --------------------TLQLDADQPVE----RYAENKQL-LNPDERSGIL-LPALK-K F--------CCD-SDWCHLPE----C--LCCNR----------------------
OK193_E_086                                             -------V-LFIFLVLFTLPTLQLDADQPVE----RHAENKQL-LNPDERRGII-LHALGQR V--------CCP-FGGCHQL-----C--QCCGC----------------------
OK193_E_087                                             -------V-LFIFLVLFTLPTLQLDADQPVE----RHAENKQL-LNPDERRRII-SDALGQR I--------CCP-QGGCHQL-----C--QCCGC----------------------
OK193_E_088                                             -------V-LFIFLVLFTLPTLQLDADQLVE----RHVENKQL-LNPDERRRII-SDALGQR I--------CCP-QGGCHQL-----C--QCCGC----------------------
OK193_E_089                                             -------V-LFIFLVLFTLPTLQLDADQLVE----RHVENKQL-LNPDERRRII-SVALGQR V--------CCP-FGGCHQL-----C--QCCGC----------------------
OK213_E_109                                             ----------------FPLATFQLDADQPVE----RHAENKQL-LNPDERRRII-SDALGQR I--------CCP-QGGCHQL-----C--QCCGC----------------------
OK213_E_110                                             ----------------FPLATFQLDADQPVE----RHAENKQL-LNPDERRGII-LHALGQR V--------CCS-FGSCDSL-----C--QCCDG----------------------
CebrOK016_E_053                                         --------------------TLHLDADQPVE----RYAENKQL-LNTDERREII-LSALRTR V--------CCP-FGGCHEL-----C--QCCEG----------------------
OK006_E_094                                             -MLKMGVL-LFIFLVLFPLTTLELDTDRPVE----RHAAIKQD-LKPQERRGIR-LHAPRDE ---------CCE-PQWCDGA-----C--DCCS-----------------------
OK212_J_118                                             -MLKMGVL-LFIFLVLFPLTTLELDTDRPVE----RHAAIKQD-LKPQERRGIR-LHAPRDE ---------CCE-PQWCDGA-----C--DCCS-----------------------
OK214_J_100                                             -MLKMGVL-LFIFLVLFPLTTLELDTDRPVE----RHAAIKQD-LKPQERRGIR-LHAPRDE ---------CCE-PQWCDGA-----C--DCCS-----------------------
terebraAEX60089                                         -MLKTGVL-LFTFLVLFPLATLQ-DADQPVE----RSVENKQD-CNLEKRWGMK-LLAQRQQ E--------CCE-PAWCDGG-----CY-HCC------------------------
SRX1323887_E_069                                        -MLKMGVL-LFIFLLLFPLATLQ-DADQRVE----RSVENKQD-LNPAKGRGMK-LLAQRQQ Q--------CCE-PAWCDGG-----CY-DCC------------------------
CebrOK035_J_099                                         -MLKTGVL-LLIFLVLFPLATLQ-DADQPVE----RYVGNKQD-LNLDKRRGMK-LLDQRQR E--------CCE-PQWCDGA-----CD-ACC------------------------
CebrOK035_J_100                                         ---------LFTLLVLFPLVTFQLDADQPGE----RYVENKPD-LNPDERRNFM-MHIV--R G--------CCR-P--CHIPP----C--QCCM-----------------------
CebrOK035_J_101                                         --------------------------DQHVE----RYVENKQD-LNPDKRRKIM-LPSMRHR R--------CCP-APKCRVG-----CY-SCCE-----------------------
CebrOK035_J_102                                         -----------------------LETEQPVE----RYVEHKQD-LNADERMGLI-LPALRQR T--------CCV-RPWCDGA-----C--DCCVNP---------------------
OK214_J_101                                             MMLKMRVL-LFTFLVLLPLVTFQLDADQPRE----QYSGNKRA-LNPGERKKTK-LHTLRQR ---------CCI-GPECPEE-----C--YCCV-----------------------
CebrOK033_J_079                                         MMLKMRVL-LFTFLVLLPLVTFQLDADQPRE----QYSGNKRA-LNPGERKKTK-LHTLRQR ---------CCI-GPECPEE-----C--YCCV-----------------------
CebrOK035_J_103                                         MMLKMRVL-LFTLLVLLPLVTFQLDADQPRE----QYSGNKRA-LNPGERKKTK-LHTLRQR ---------CCI-GPECPEE-----C--YCCV-----------------------
OK212_J_119                                             MMLKMRVL-LFTFLVLLPLVTFQLDADQSRE----QYSGNKRA-LNPGERKKTK-LHTLRQR ---------CCI-GPECPEE-----C--YCCV-----------------------
OK193_E_090                                             MMLKMRVL-LFTFLVLLPLVTFQLDADQPRK----QYAGNKRA-LNPGERKKTK-LHALRQR ---------CCI-GPECPEE-----C--YCCV-----------------------
OK213_E_111                                             MMLKMRAV-LFTFLVLLPLVTFQLDADQPRK----QYAGNKRA-LNPGERKKTK-LHALRQR ---------CCI-GPECPEE-----C--YCCV-----------------------
ebraeusAFQ98117                                         ----------FTFLVLLPLVTFQLDADQPRK----QYAGNKRA-LNPGERKKTK-LHALRQR ---------CCI-GPECPEE-----C--YCCV-----------------------
ebraeusAFQ98116                                         ----------FTFLVLLPLVTFQLDADQPRE----QYAGNKRA-LNPGERKKTK-LHALRQR ---------CCI-GPECPEE-----C--YCCV-----------------------
OK006_E_095                                             -MLKMGVVMLFTFLVLLPLVTFQLDADQPRE----QYSGNKRA-LNPGERKKTK-LHTLRQR ---------CCI-GPECPEE-----C--YCCV-----------------------
SRX1323887_E_070                                        MMLKTGVV-LFVFLVLFNLATFQLHADQPVA----RYVENK-----PNLRRGFK-LPDQKQK R--------CCP-ESHCNAG-----C--SCCR-----------------------
CebrOK014_E_046                                         ------------------------------------DAENKQD-LHPDERTGFM-LSAVG-R R--------CCK-LERCSMN-----C--HCCVQRL--------------------
CebrOK035_J_104                                         ----MGVV-LIGFLGLCRVATLQLDGDQPGE----RYADNNQD-LSPDERRGFM-LGALLP- ---------CCR-TEVCYKP-----C--RCC------------------------
CebrOK035_J_105                                         -----------VFLVLFPLATRQLDADQPAE----RYAENKQG-LNPDERSEFI-MPVSRSS DLGVREELDCCENGPSCFIYLT---C--KCCKHT---------------------
CebrOK035_J_106                                         --------------------------DQPVE----RNAENKQD-INPAERRRDM-MIALGRP F--------CCP-IGQCQLSM----CDPPCCD-----------------------
CebrOK035_J_107                                         ------------------------------E----RYAENKQD-ISPDERKRFL-TLALRQG D--------CCP-YGPCRVSM----CDPPCCA-----------------------
																													   
OK193_E_091                                             -MLKMGVVMLFTFLVLFPLATLHLDADQPAD----RPAERMQD-I-ATEQHPMF-DPVKR-- ---------CCR-KHSC-TT-----CM-PCCWG----------------------
OK005_J_093                                             MMLKLRVV-LFILLVLFPLTTLQLDADQPAD----RPAERMQD-I-ATEQHPMF-DPVKR-- ---------CCR-KQSC-TT-----CM-PCCWG----------------------
OK212_J_120                                             -------V-LFILLVLFPLTTLQLDADQPAD----RPAERMQD-I-ATEQHPMF-DPVKR-- ---------CCR-KQSC-TT-----CM-PCCWG----------------------
OK214_J_102                                             MMLKLRVV-LFVFLVLFPLATLQLDADQPAD----RPVERMQD-I-APEQHPMF-DPVKR-- ---------CCR-KQSC-TT-----CM-PCCWG----------------------
OK193_E_092                                             MMLKLSVV-LFVFLVLFPLATLHLDADQPAD----RPAERMQD-I-ATEQHPMF-DPVKR-- ---------CCR-KHSC-TT-----CM-PCCWG----------------------
SRX1323887_E_071                                        MMLKLRVV-LFVFLVLFPLATLHLDADQPAD----RPAERMQD-I-ATEQHPMF-DPVKR-- ---------CCR-KQSC-TT-----CM-PCCVD----------------------
OK213_E_112                                             MMLKLRVV-LFVFLVLFPLATLHLDADQPAD----RPA-RMQD-I-ATEQHPLF-DPVKR-- ---------CC--AQPCYMG-----CI-PCCF-----------------------
OK212_J_121                                             --------------------------DQPAD----RPA-RMQD-I-ATEQHPLF-DPVKR-- ---------CC--VGPCYMG-----CI-PCCL-----------------------
OK214_J_103                                             MMLKLRVV-LFVFLVLFPLATLQLDADQPAD----RPA-RMQD-I-ATEQHPLF-DPVKR-- ---------CC--ELPC-IG-----CF-PCCFR----------------------
CebrOK033_J_080                                         MMLKMGVV-LFTFLVLFPLATLQLDADQPAD----RPA-RMQD-I-ATEQHPLF-DPVKR-- ---------CC--ELPC-MG-----CI-PCCFR----------------------
CebrOK035_J_108                                         ---KLRVV-LFVFLVLFPLATLQLDADQPAD----RPA-RMQD-I-ATEQHPLF-DPVKR-- ---------CC--ELPC-MG-----CI-PCCFR----------------------
OK212_J_122                                             ------VV-LFVFLVLFPLATLQLDADQPAD----RPA-RMQD-I-ATEQHPLF-DPVKR-- ---------CC--ELPC-MG-----CI-PCCFR----------------------
OK005_J_094                                             MMLKLRVV-LFVFLVLFPLATLQLNADQHAD----RPA-RMQD-I-ATEQHPLF-DPVKR-- ---------CC--ELPC-MG-----CI-PCCFR----------------------
OK005_J_095                                             -MLKMGVV-LFVFLVLFPLATLQLNADQHAD----RPA-RMQD-I-ATEQHPLF-DPVKR-- ---------CC--ELPC-MG-----CI-PCCFR----------------------
OK005_J_096                                             -MLKIGVV-LFVFLVLFPLATLQLNADQHAD----RPA-RMQD-I-ATEQHPLF-DPVKR-- ---------CC--ELPC-MG-----CI-PCCFR----------------------
OK213_E_113                                             MMLKLSLV-LFILLVPFPLTTLQLDADQPAD----RPA-RKKD-I-ATKRHPLF-DPVKR-- ---------CC--EWPC-AG-----CI-PCCFR----------------------
OK006_E_096                                             MMLKMGVV-LFVFLVLFPLATLQLDADQPAD----RPA-RKKD-I-ATKRHPLS-DPDRR-- ---------CC--GWPC-IP-----CL-L--------------------------
OK006_E_097                                             MMLKLSVV-LFVFLVLFPLATLQLDADQPAD----RPA-RKKD-I-ATKRHPLS-DPDRR-- ---------CC--GWPC-IP-----CL-L--------------------------
OK213_E_114                                             MMLKLSLV-LFILLVPFPLTTLQLDADQPAD----RPA-RKKD-I-ATKRHPLS-DPDRG-- ---------CC--GWSC-TP-----CF-P--------------------------
OK193_E_093                                             -MLKMGVVMLFTFLVLFPLATLHLDADQPAD----RPA-RKKD-I-ATKRHPLS-DPDGR-- ---------CC--CWRC-TR-----SL-H--------------------------
OK213_E_115                                             MMLKLSLV-LFILLVPFPLTTLQLDADQPAD----RPA-RKKD-I-ATKRHPLS-DPDGR-- ---------CC--CWRC-TR-----SL-H--------------------------
OK193_E_094                                             MMLKLSVV-LFVFLVLFPLATLHLDADQPAD----RPA-RKKD-I-ATKRHPLS-DPDGR-- ---------CC--CWRC-TR-----SL-H--------------------------
OK193_E_095                                             -MLKMGVVMLFTFLVLFPLATLHLDADQPAD----RPA-RMQD-I-ATEQHPLF-DSLRG-- ---------CC--SGAC-LP-----CR-R--------------------------
OK193_E_096                                             MMLKLSVV-LFVFLVLFPLATLHLDADQPAD----RPA-RMQD-I-ATEQHPLF-DSLRG-- ---------CC--SGAC-LP-----CR-R--------------------------
OK213_E_116                                             MMLKLSLV-LFILLVPFPLTTLQLDADQPAD----RPA-RMQD-I-ATEQHPLF-DSLRG-- ---------CC--SGAC-LP-----CR-R--------------------------
SRX1323887_E_072                                        -MLKLRVV-LFVFLVLFPLATLHLDADQPAD----RPA-RMQD-I-ATEQHPLF-DSLRG-- ---------CC--GWSC-TP-----CF-P--------------------------
OK005_J_097                                             -MLKIGVV-LFVFLVLFPLATLQLNADQHAD----RPA-RKKD-I-ATKRHPLS-DPDRG-- ---------CC--PPLC-TP-----CF-P--------------------------
CebrOK035_J_109                                         MMSKLGAL-LTICLLLFP--------DQPAD----RPA-RKKD-I-ATKRHPLS-DPDRG-- ---------CC--PPLC-TP-----CF-P--------------------------
coronatusQGV13651                                       MMLKLRVV-LFVFLVLFPLATLQLDADQPPD----RPA-RKKD-I-ATKRHPLF-DRDTG-- ---------CC--FPYC-TP-----CR-T--------------------------


[Superfamily M-3a-WF]   
[No Framework]

CebrOK014_E_047                                         --MMSKLGFV-LFTLLLLFPLATLPMEVDQPAERLVQDDETLNSAERTGAIMTLMRHLRW--------CP-----PFCV----------------------------
OK006_E_098                                             --MMSKLGFV-LFTLLLLFPLATLPMEVDQPAERLVQDDETLNSAERTGAIMTLMRHLRQ--------CY-----PFCA----------------------------
CebrOK033_J_081                                         --MMSKLGVV-LFTLLLLFPLVTLPMEVDQPVERHAEDEQTLNSAERTGAIMNLLRHLRQ--------CY-----PVCV----------------------------
OK214_J_104                                             --MMSKLGVV-LFTLLLLFPLVTLPMEVDQPVERHAEDEQTLNSAERTGAIMNLLRHLRQ--------CY-----PVCV----------------------------
OK212_J_123                                             --MMSKLGVM-LFTLLLLFPLVTLPMEVDQPVERHAEDEQTLNSAERTGAIMNLLRHLRQ--------CY-----PVCV----------------------------
OK193_E_097                                             --------------------LVTLSMEVDQPVERHAEDEQTLNSAEGTGAIMTLLRLLRG--------CP-----PDCGGSPSMM------------PW--------
SRX1323887_E_073                                        ---MSKLGVV-LFTFLLLLPLVMLSMEVDQPVERHAEDEQTLNSAEGTGAIMTLLRLLRG--------CP-----PDCGGSPSMM------------PW--------
CebrOK014_E_048                                         ---MSKLGVV-LFTFLLLLPLVTLSMEVDQPVERHAQDEQTLNSAEGTGSIMTLLRHLRM--------CP-----PDCSVWKSTM------------P---------
													    
CebrOK035_J_110                                         ---MLKTGVL-LLIFLVLFPLATLQLDAEQRVERNVDNKQDLNPEERKEIIMAALRQATQ------RYCP-RP---VC-----------------------------
CebrOK014_E_049                                         ---------V-LFIFLVLFPLATLQLDAEQRVERYVDNKQDLNPEERRDFIMAALRQATG------RVCM------WC-----------------------------
OK193_E_098                                             ----------------------------EQRVERYVDNKQDLNPEERRDFIMAALRQATG------RVCM------WC-----------------------------
OK212_J_124                                             --MMLKMGVV-LFIFLVLFPLATLQLDAEQRVERYVDNKQDLNPEERRDFIMAALRQATG------RVCM------WC-----------------------------
CebrOK033_J_082                                         ---MLKMGVV-LFIFLVLFPLAALQLDAEQRVERYVDNKQDLNPEERRDFIMAALRQATG------RVCM------WC-----------------------------
OK212_J_125                                             ---MLKMGVV-LFIFLVLFPLATLQLDAEQRVERYVDNKQDLNPEERREIIMAALRRATE------RRCL-FL---LC-----------------------------
OK212_J_126                                             ---MLKMGVV-LFIFLVLFPLATLQLDAEQRVERYVDNKQDLNPEERREIIMAALRRATE------RRCI-WP---WC-----------------------------
													    
CebrOK014_E_050                                         --MMLKLRVV-LFILLVLFPLTTLQLDADRPVERYVENKENLNPDERRKIILPALRTLIS------SGCGENP--DWCK----------------------------
OK006_E_099                                             --MMLKLRVV-LFILLVLFPLTTLQLDADQPVERYVENKENLNPDERRKIILPALRTLIS------SGCGENP--DWCK----------------------------
OK214_J_105                                             ------VGVV-LFVFLVLFPLATLQLDADPPVERYVENKENLNPDERRKIILPALRTLIS------SGCGENP--DWCK----------------------------
CebrOK016_E_054                                         --MMLKLRVV-LFILLVLFPLTTLQLDADRPVERYVENKENLNPDERREIILPALRLQSS------SRCSEDP--FFCK----------------------------
OK006_E_100                                             -------------------------------VERYVENKENLNPDERREIILPALRLQSS------SRCSEDL--FFCN----------------------------
CebrOK014_E_051                                         --MMLKLRVV-LFILLVLFPLTTLQLDADRPVERYVENKENLNPDERREIILPALRLQSS------SRCSEDL--FFCN----------------------------
CebrOK014_E_052                                         --MMLKLRVV-LFILLVLFPLTTLQLDADRPVERYVENKENLNPDERREIILPALRVQSL------FDCIGYA--GSCK----------------------------
CebrOK016_E_055                                         --MMLKLRVV-LFILLVLFPLTTLQLDADRPVERYVENKENLNPDERREIILPALRVQSL------FDCIGYA--GSCK----------------------------
OK006_E_101                                             -------------------------------VERYVENKENLNPDERREIILPALRVQSL------FDCIGYA--GSCK----------------------------
SRX1323887_E_074                                        ------------------FPMATLQLDADQPVERYVENKENLNPDERREIILPALRVQSL------FDCIGYA--GSCK----------------------------
OK213_E_117                                             --------------------------DADQPVERYVENKENLNPDERREIILPALRVQSL------LDCIGYA--GSCE----------------------------
CebrOK016_E_056                                         --MMLKLRVV-LFILLVLFPLTTLQLDADQPVERYAENKQLLSPDERREIILPALRVQSL------FDCIGYA--GSCK----------------------------
CebrOK016_E_057                                         --MMLKLRVV-LFILLVLFPLTTLQLDADRPVERYVENKENLNPDERREIILPALRVQSL------VTCTMD----WCK----------------------------
OK193_E_099                                             --MMLKLRVV-LFILLVLFPLTTLQLDADQPVERYVENKENLNPDERREIILPALRVQSL------VTCTM------------------------------------
OK193_E_100                                             --MMLKLRVV-LFILLVLFPMATLQLDADQPVERYVENKENLNPDERREIILPALRVQSL------VTCTMD----WCK----------------------------
OK006_E_102                                             --MMLKLSVV-LFILLVLFPMATLQLDADRPVERYVENKENLNSDERREI---------------------------------------------------------
OK006_E_103                                             --MMLKLRVV-LFILLVLFPLTTLQLDADQPVERYVENKENLNPDERREIILPALRVQSL------LDCIGDP--GSCK----------------------------
OK193_E_101                                             --MMLKLRVV-LFILLVLFPMATLQLDADQPVERYVENKENLNPDERREIILPALRVQSL------LDCIGDP--GSCK----------------------------
OK193_E_102                                             --MMLKLRVV-LFILLVLFPLTTLQLDADQPVERYVENKENLNPDERREIILPALRVQSL------IACGDNP--DLCI----------------------------
OK006_E_104                                             ---MLKLSVV-IFILLELFPLTTLQLDADQPVERYLENKENLNPDERREIILPALRVQSL------VTCTMD----WCK----------------------------
SRX1323887_E_075                                        ------------------FPMATLQLDADQPVERYVENKENLNPDERREIILPALRVQSL------VACGDNP--DWCT----------------------------
OK213_E_118                                             --MMLNLRVV-LVILLVLFPLTTLQLDADQPVERYVVNKENLNPDERREVILPALRVQSF------IACTM----GWCK----------------------------
OK193_E_103                                             -----------------------------QFVERYAENKQNLNPDERREIILPALRVQSL------LDCIGDP--GSCK----------------------------
OK212_J_127                                             --MMLKLRVV-LFISLILFPLATLQLDADQPVERYAENKQDFNPDERRGIILPAMRG--------------------------------------------------
CebrOK014_E_053                                         --MMLKMRAV-LFTFLVLFPLATFQLDADRPVERYAENKQDLNPDKRREIILPALRLQAR------RSCS-FPSNTWCK----------------------------
CebrOK016_E_058                                         --MMLKMRAV-LFTFLVLFPLATFQLDADQPVERYAENKQDLNPDKRREIILPALRLQAR------RSCS-FPSNTWCK----------------------------
OK193_E_104                                             --MMLKMGVV-LFVFLVLFPLATFQLDADQPVERNAENKQDLNPDKRREIILPALRLQAR------RSCS-FPSNTWCK----------------------------
OK213_E_119                                             --MMLKMRAV-LFTFLVLFPLATLQLDADQPVERNAENKQDLNPDKRREIILPALRLQAR------RSCS-FPSNTWCK----------------------------
SRX1323887_E_076                                        ------------------FPMATLQLDADQPVERNAENKQDLNPDKRREIILPALRLQAR------RSCS-FPSNTWCK----------------------------
CebrOK014_E_054                                         --MMLKMGVV-LFVFLVLFPLATLQLDADRPVERYAENKQDLNPDKRREIILPALRLQAR------RSCS-FPSNTWCK----------------------------
OK213_E_120                                             --MMLKMRAV-LFTFLVLFPLATLQLDADQPVERYVENKENLNPDERREIILPALRLQAR------RSCS-FPSNTWCK----------------------------
OK193_E_105                                             --MMLKMRAV-LFTFLVLFPLATLQLDADQPVERYVENKENLNPDERREIILPALRLQAR------RSCS-FPSNTWCK----------------------------
OK213_E_121                                             --MMLKLRVV-LFILLVLFPLTTLQLDADQPVERYVENKENLNPDERREIILPALRLQAR------RSCS-FPSNTWCK----------------------------
OK005_J_098                                             ---MLKIGVV-LFVFLVLFPLATLQLNADQHVERYAENKQDLNPDKRREIILPALRLQAR------RSCS-FPSNTWCK----------------------------
OK213_E_122                                             --MMQKMRAV-LFTFLVLFPLATFQLDADQPVERNAENKQDLNPDKRREIILPALRLHAR------RSCS-FPSN--------------------------------
OK193_E_106                                             --MMLKMGVV-LFVFLVLFPLATFQPDADQPVEPNAENKQDLNPDKRREIIL-------------------------------------------------------
OK213_E_123                                             --MMLKMRAL-LFTSLVLFPLATEQLNADQQVKRYAENKQVLNPDKRREIILPTLRLQAR------RSCS-FPSNTWCK----------------------------
A_0875_013                                              --MMLKMGVV-LFTFLVLFPLATLQLDADQPVERYAENKQDLNPDERREIILPAPRQRAT-----QPPC--MPMNPWC-----------------------------
OK214_J_106                                             --MMLKMGVV-LFVFLVLFPLSTLQLDADQPVERYAENKQDLNPDERREIILPALRLQPS------SDCPGFP-NVWCK----------------------------
OK214_J_107                                             ---MLKIGVV-LFVFLVLFPLSTLQLDADQPVERYAENKQDLNPDERREIILPALRLQPS------SDCPGFP-NVWCK----------------------------
OK214_J_108                                             --MMLKMGVV-LFVFLVLFPLSTLQLDADPPVERYVENKENLNPDERREIILPALRLQPS------SDCPGFP-NVWCK----------------------------
SRX1323887_E_077                                        ------------------FPMATLQLDADQPVERNAENKQDLNPDKRREIILPALRRQPS------SDCPGFP-DVWCK----------------------------
SRX1323887_E_078                                        ------------------FPMATLQLDADQPVERYVENKENLNPDERREIILPALRRQPS------SDCPGFP-DVWCK----------------------------
ermineusAXL95407                                        ---MLKMGVL-LFIFLVLFPLATLQLDADQPVERYAENKQDFKPDERREIILPALGPPSVDKRATSLACAIWT---KC-----------------------------

OK005_J_099                                             -----------------------------QPVERYAEYKQDLNPDGRRGIILSALRSPNS--------CV-WS--PPCHLPSERMTAFTANNAALELPYSGLVAPEQ
OK213_E_124                                             --MMLKMGVV-LFVFLVLFPLSTLQLDADQPVERNAENKQDLNPDGRRGIILSALRSPNS--------CV-WS--PPCHLPSERMTAFTANNAALELPYSGLVAPEQ
OK213_E_125                                             --MMLKLSVV-LFVFLVLFPLATLQLDADQPVERNAENKQDLNPDGRRGIILSALRSPNS--------CV-WS--PPCHLPSERMTAFTANNAALELPYSGLVAPEQ
OK213_E_126                                             --MMLKLSVV-LFVFLVLFPLATLQLDADQPADRDAENKQDLNPDGRRGIILSALRSPNS--------CV-WS--PPCHLPSERMTAFTANNAALELPYSGLVAPEQ
OK213_E_127                                             --MMLKMRAV-LFTFLVLFPLATLQLDADQPADRDAENKQDLNPDGRRGIILSALRSPNS--------CV-WS--PPCHLPSERMTAFTANNAALELPYSGLVAPEQ
CebrOK014_E_055                                         ---MLKMGVV-LFIFLVLFPLATLQLDADQPADRDAENKQDLNPDGRRGIILSALRSSS---------CD-WT--PACHLPSERMTAFTANNAALELPYSGLVAPEQ
SRX1323887_E_079                                        ---MLKMGVV-LFTFLVLFPLATFQLDADQPADRDAENKQDLNPDGRRGIILSALRSSS---------CD-WS--PACHLPSERMTAFTANNAALELPYSGLVAPEQ
SRX1323887_E_080                                        ---MLKMGVVMLFTFLVLFPLATFQLDADQPADRDAENKQDLNPDGRRGIILSALRSSS---------CD-WS--PACHLPSERMTAFTANNAALELPYSGLVAPEQ
OK193_E_107                                             --MMLKMRAV-LFTFLVLFPLATLQLDADQPADRDAENKQDLNPDGRRGIILSALRSSS---------CD-WS--PACHLPSERMTAFTANNAALELPYSGLVAPEQ
CebrOK016_E_059                                         ---MLKMGVVMLFTFLVLFPLATLQLDADQPADRDAENKQDLNPDGRRGIILSALRSQRA--------CD-WS--LACHLPSERMTAFTANNAALELPYSGLVAPEQ
OK006_E_105                                             --------VV-LFIFLVLFPLATLQLDADQPADRDAENKQDLNPDGRRGIILPALRSSSS--------CD-WS--SACHLPSERMTAFTANNAALELPYSGLVAPEQ
SRX1323887_E_081                                        --MMLKMGVV-LFVFLVLFPLATFQLDADQPADRDAENKQDLNPDGRRGIILPALRSQRS--------CN-WS--SLCDPPSERMTAFTANNAALELPYSGLVAPEQ
SRX1323887_E_082                                        ---MLKMGVV-LFTFLVLFPLATFQLDADQPADRDAENKQDLNPDGRRGIILPALRSQRS--------CN-WS--SLCDPPSERMTAFTANNAALELPYSGLVAPEQ
SRX1323887_E_083                                        ---MLKMGVVMLFTFLVLFPLATFQLDADQPADRDAENKQDLNPDGRRGIILPAVRSQRS--------CK-WN--PLCDPPSERMTAFTANNAALELPYSGLVAPEQ

OK193_E_108                                             ---MLKMGVV-LFIFLVLFTLPTLQLDADLPADRDAENKQDFNPDGR------------------------------------------------------------
magusQFQ61047                                           ---MLKMGAV-LFTFLVLFPLATLQLDADQPVERHAENKQDLNPYERREIILPALRRRSG--------CP-WV--SWCG----------------------------
CebrOK033_J_083                                         ---MLKMGVV-LFIFLVLFPLATLQLDADQPVERYAGNKLDLNPDERREIILPALGHGRS------SRCSGWR---TC-----------------------------
OK212_J_128                                             ---------------------------ADQPVERYAGNKLDLNPDERREIILPALGHGRS------SRCSGWR---TC-----------------------------
OK006_E_106                                             --------VV-LFIFLVLFPLATLQLDADHPVERYAGNKLDLNPDERREIILPALGHGRS------SRCSGWR---TC-----------------------------
OK005_J_100                                             ---MLKIGVV-LFVFLVLFPLATLQLDADHPVERYAGNKLDLNPDERREIILPALGHGRS------SRCSGWR---TC-----------------------------
CebrOK035_J_111                                         --MILKMGVV-LFIFLVLFPLVTLQLDADHPVERYAGNKLDLNPDERREIILPALGHGRS------SRCSGWR---TC-----------------------------
OK005_J_101                                             ---MLKMGVV-LFTFLVLFPLATLQLDADHPVERYAGNKLDLNPDERREIILPALGHGRS------SRCSGWR---TC-----------------------------
OK214_J_109                                             --MTLKMGVV-LFVFLDLFPLATLQLDADHPVERYAGNKLDLNPDERREIILPALGHGRS------SRCSGWR---TC-----------------------------
OK006_E_107                                             MFMMLKLRVV-LFTLLDQVPMATLKLDADQPVKRYVENKENLNPD--------------------------------------------------------------
OK193_E_109                                             ---MLKMRSV-LFTLLVLFPLATLQLDAVQPVERNADNKQDLNPDGRRGFILLALRSGAS-----PGDCK-----KNCFVKALR-----------------------
OK214_J_110                                             --------------------LATLQLDADQPADRDAENKQDLNADGKSGIVLPALRRKRG--------CP-GD--PWCDF---------------------------

CebrOK033_J_084                                         ---MSKLGVV-LFTFLLLFPLATLQRIQDQPADRNAEPRGKIRERMNGFLTRILLGHPGH---YYAASCP------WCG----------------------------
CebrOK035_J_112                                         ---MSKLGVV-LFTFLLLFPLATLQRIQDQPADRNAEPRGKIRERMNGFLTRILLGHPGH---YYAASCP------WCG----------------------------
OK214_J_111                                             ---MSKLGVV-LFTFLLLFPLATLQRIQDQPADRNAEPRGKIRERMNGFLTRILLGHPGH---YYAASCP------WCG----------------------------
OK005_J_102                                             ---MSKLGVV-LFTFLLLFPLATLQRIQDQPADRNAEPRGKIRERMNGFLTRILLGHPGH---YYAASCP------WCG----------------------------
OK212_J_129                                             ---MSKLGVV-LFTFLLLFPLATLQRIQDQPADRNAEPRGKIRDRMNGFLTRILLGHPGH---YYAASCP------WCG----------------------------
CebrOK016_E_060                                         ---MSKLGVV-LFTFLLLFPLATLQRIQDQPADRNAEPRGKIRGRMNGFLTQMLFGHPGH---NYAAWCP------WCG----------------------------
OK213_E_128                                             ---MSKLGVV-LFTFLLLFPLATLQRIQDQPADRNAEPRGKIRGRMNGFLTQMLFGHPGH---NYAAWCP------WCG----------------------------
SRX1323887_E_084                                        ---MSKLGVV-LFTFLLLFPLATLQRIQDQPADRNAEPRGKIRGRMNGFLTQMLFGHPGH---NYAAWCP------WCG----------------------------
OK193_E_110                                             ---MSKLGVV-LFTFLLLFPLATLQRIQDQPADRNAEPRGKIRGRMNGFLTQMLFGHPDH---NYAAWCP------WCG----------------------------
OK006_E_108                                             ---MSKLGVV-LFTFLLLFPLATLQRIQDQPADRNAEPRGKIRGRMNGFLTQMLFGHPDH---NYAAWCP------WCG----------------------------
OK193_E_111                                             ---------------LLVFSLATPKPIQDQPTDRHAEPRGKIRDGMNELFWRMLIRYQHQ-RHHYAFACP------WCG----------------------------

[Superfamily M-3b-WF conomarphin]   
[No Signal, no Framework] 

											            
CebrOK016_E_061                                         -MSKLGVVLCIFLVLFPMATLQLDGDQTADRHADQRGQDLTEQQRNSKRVLKKRD--WEYHAHPKP---NSFWTLV--
OK193_E_112                                             -MSKLGVVLCIFLVLFPMATLQLDGDQTADRHADQRGQDLTEQQRNSKRVLKKRD--WEYHAHPKP---NSFWTLV--
OK005_J_103                                             -MSKLGVVLCIFLVLFPMATLQLDGDQTADRHADQRGQDLTEQQRNSKRVLKKRD--WEYHAHPKP---NSFWTLV--
imperialisP0CH39                                        MMSKLGVLLCIFLVLFPMATLQLDGDQTADRHADQRGQDLTEQQRNSKRVLKKRD--WEYHAHPKP---NSFWTLV--
marmoreusAGE10522                                       MMSKLGVLLCIFLVLFPMATLQLDGDQTADRHADQRGQDLTEQQRNSKRVLKKRD--WEYHAHPKP---NSFWTLV--
OK213_E_129                                             -MSKLGVVLFIFLVLFPMATLQLDGDQTADRHADQRGQDLTEQQRNSKRVLKKRD--WEYHAHPKP---NSFWTLV--
OK006_E_109                                             -MSKLGVVLFIFLVLFPMATLQLDGDQTADRHADQRGQDLTEQQRNSKRVLKKRD--WEYHAHPKP---NSFWTLV--
SRX1323887_E_085                                        -MSKLGVVLFIFLVLFPMATLQLDGDQTADRHADQRGQDLTEQQRNSKRVLKKRD--WEYHAHPKP---NSFWTLV--
CebrOK035_J_113                                         -MSKLGVVLCIFLVLFPMATLQLDGDQTADRHADQRGQDLTKQYRNLKRVLKKRH--WVYHPHPHD---NSIWSL---
V_CG13_136                                              -MSKLGVVLFIFLVLFPMATLQLDGDQTADRHADERDQDLTEQYRNLKRVLKRDW--THIQAHPND---NVVWSLV--
A_0055_199                                              -MSKLGVVLFIFLVLFPMATLQLDGDQTADRHADERDQDLTEQYRNLKRVLKRDL--IHTNAHPHK---NSVWSLV--
											            
CebrOK033_J_085                                         -MSKLGVVLFIFLVLFPMATLQMDADQTADRHADERDQDLADQYRNLMRVLKRGW---THHVKVEP---NSFWSLV--
OK005_J_104                                             -MSKLGVVLFIFLVLFPMATLQMDADQTADRHADERDQDLADQYRNLMRVLKRGW---THHVKVEP---NSFWSLV--
OK212_J_130                                             -MSKLGVVLFIFLVLFPMATLQMDADQTADRHADERDQDLADQYRNLMRVLKRGW---THHVKVEP---NSFWSLV--
CebrOK035_J_114                                         -MSKLGVVLFIFLVLFPMATLQMDADQTADRHADERDQDLAEQYRNLMRVLKRGW---THHVKLEP---NSFWSLV--
OK214_J_112                                             -MSKLGVVLFIFLVLFPMATLQMDADQTADRHADERDQDRAEQYRNLMRVLKRGW---THHVKLEP---NSFWSLV--
OK006_E_110                                             -MSKLGVVLFIFLVLFPMATLQMDADQTADRHADERDQDRAEQNRNLMRVLKRGW---THHVKVEP---NSFWSLV--
OK214_J_113                                             -MSKLGVVLFIFLVLFPMATLQMDADQTADRHADERDQDRAEQYRNLMRVLKRGW---IHHVKLDP---NSFWTLV--
betulinusAGE10519                                       -MSKLGVVLCIFLILFPMATLQLDGDQTADRHADERDQDLAGQYRNLKRVLKRGW---VYHANPEA---NSWWTLV--
											            
OK213_E_130                                             -MSKLGVVLFIFLVLFPMATLQMDADQTADRHADERDQDRAEQNRNLMRVLKRDW--FHIDLTPNNK--NTWWTLV--
OK006_E_111                                             -MSKLGVVLFIFLVLFPMATLQMDADQTADRHADERDQDRAEQNRNLMRVLKRDW--FHIDLTPNNK--NTWWTLV--
SRX1323887_E_086                                        -MSKLGVVLFIFLVLFPMATLQMDADQTADRHADERDQDRAEQNRNLMRVLKRDW--FHIDLTPNNK--NTWWTLV--
OK193_E_113                                             -MSKLGVVLCIFLVLFPMATLQMDADQTADRHADERDQDRAEQNRNLMRVLKRDW--FHIDLTPNNK--NTWWTLV--
											            
OK213_E_131                                             -MSKLGVVLFIFLVLFPMATLQLDGDRTADRHADERGQDLAEQYGNLKHVMKRSSEHRAHHTHPHD---NSFWTLV--
OK005_J_105                                             -MSKLGVVLCIFLVLFPMATLQLDGDRTADRHADERGQDLAEQYGNLKHVMKRSSEHRAHHTHPHD---NSFWTLV--
gloriamarisGFNK01000032                                 -MSKLGVVLCIFLVLFPMATLQLDGDQTADRPADERGQDLAEQYRNLKRVMKRSSEHRAHHTHPND---NSFWTLV--
											            
OK214_J_114                                             -MSKLGVVLFIFLVLFPMATLQLDGDQPADRRADEK--DLTQQYLNLRRVLQRGL--VCAHASPYH---NAVWS----
OK006_E_112                                             -MSKLGVVLFIFLVLFPMATLQLDGDQPADRRADEK--DLTQQYLNLRRVLQRGL--VCAHASPYH---NAVWS----
											            
OK212_J_131                                             -MSKLGVVLFIFLVLFPMATLQLDGDQPADRRADEKDQDLTQQYLNLRRVLQRGL--VCTHVRPYH---NAVWS----
OK212_J_132                                             -MSKLGVVLFIFLVLFPMATLQLDGDQPADRRADEKDQDLTQQYLNLRRVLQRGL--VCAHVRPYH---NSMWS----
OK006_E_113                                             -MSKLGVVLFIFLVLFPMATLQLDGDQPADRRADEKDQDLTEQYLKLRRVLQRGL--VCAHVSPSQ---NSWWT----
andremeneziATF27409                                     -MSKLGVVLFIFLVLFPMTTVQLDGDQPANRHADERGQGLTDQYRNLRHVLKRGL--RCAGASYDP---NSWWTLV--
OK193_E_114                                             -MSKLGVMLFIFLVLFPMATLQLDGDQTADRHAGERDQDLLEQYRNLKHALKRTRNYYVYSASPE----NSWWTRVV-
magusQFQ61035                                           -MSKLGVMLFIFLVLFPMATLQLDGDQTADRHAGERDQDLVEQYRNLKHALKRTRNYYVYSARPK----NSWWT----

OK006_E_114                                             -MSKLGVVLFIFLVLFPIATLQMDGDQLADRHAVERSQDPTQQYRNLRNVLKRSL---RCSGGPKG---NSFWTLV--										                
praecellensATF27630                                     -MSKLGVVLFIFLVLFPMTTVQLDGDQPADRHADERGQGLTDQYRNLRNVLKRGL---RCAGASYD--PNSWWTLV--

[Superfamily M-5]  
[Framework IX]
[                                                       /------Signal-------/-----------------Pro--------------//C-----C--C------C---------C--C--/-]

CebrOK014_E_056                                         MSKVGAVLLIFLVILSLAALQNGDD-PRRQRDEKQSPKR----GSLRKYSYNIQRR CVYSTPCGECTRRGKICSVEPGGRGTCGECVPGRR
OK213_E_132                                             MSKVGAVLLIFLVILSLAALQNGDD-PRRQRDEKQSPKR----GSLRKYSYNIQRR CVYSTPCGECTRRGKICSVEPGGRGTCGECVPGRR
OK193_E_115                                             MSKVGAVLLIFLVILSLAALQNGDD-PRRQRDEKQSPKR----GSLRKYSYNIQRR CVYSTPCGECTRRGKICSVQPGGKGTCGECVPGRR
CebrOK016_E_062                                         MSKVGAVLLIFLVILSLAALQNGDD-PRRQRDEKQSPKR----GSLRKYSYNIQRR CVYSTD-----------------------------
							  	                         																				 
CebrOK016_E_063                                         MSKVGAVLLIFLVILSLAALQNGDD-PRRQRDEKQSPKRGIVQGNLRKYSYNIQRR CANSTPCTDCTSQGKICQVQIGGKGTCGECIPPSG
OK213_E_133                                             MSKVGAVLLIFLVILSLAALQNGDD-PRRQRDEKQSPKRGIVQGNLRKYSYNIQRR CANSTPCTDCTSQGKTCQVQRGGKGTCGECIPPSG
SRX1323887_E_087                                        MSKVGAVLLIFLVILSLAALQNGDD-PRRQRDEKQSPKRGIVQGNLRKYSYNIQRR CANSTPCTDCTSQGKTCQVQRGGKGTCGECIPPSG
CebrOK035_J_115                                         MLKVGVVFLVFLVLLSLADSWNGDN-PGRQRGEKQHPQWNVFRSNLRKHSSNHQRR CANSTP-----------------------------																												 
magusDAC80582                                           MTKVEVVLLIFLVLLSLASLQNGDD-PRRQRDEKQSPQRRIVQGTLRKYMYNIQRR CAYGTPCSDCTSAGKVCSVKSGGKGSCGTCVPGAK
betulinusAMP44675                                       MSKVEVVLLIFLGLLSLAALQNGDDSSRRQRDGKQSPQRDIVRRTRRRYNDNIQRR CVNSTPCSECTNEGKICSVKPGGKGTCGECVQARR

[Superfamily M-8]  
[Framework IX]
[                                                       /--------Signal------/----------------Pro-------------/ /-C----C-----C---C-C----------C-------]


OK214_J_115                                             MMLKLRVGVYILLVLLPLTTLQEKKDDASEALVKQSDEKRAEGAIVMPDLTRDTR DGCSNKRCNNTADCSTGCSCNWNLVVRNNTCVSD-----
OK006_E_115                                             MMLKLRVGVYILLVLLPLTTLQEKKDDASEAPVKQSDEKRAEGAILTPDLTRDTR DGCSNKRCNNTADCSTGCSCNWNLVVRNNTCVSD-----
OK006_E_116                                             MMLKLRVGVYILLVLLPLTTLQEKKDDASEAPVKQSDEKRAEGAILTPDLTRDTR DGCNNNGCNNTDDCPSGCSCNLNQFGRGNTCISD-----
CebrOK014_E_057	                                        MMLKLRVGVYILLVLLPLTTLQEKKDDASEALVKQSDEKRAEGAILTPDLTRDTR DGCNNNGCNNTDDCPSGCSCNLNQFGRGNTCISD-----
CebrOK016_E_064	                                        MMLKLRVGVYILLVLLPLTTLQEKKDDASEALVKQSDEKRAEGAILTPDLTRDTR DGCNNNGCNNTDDCPSGCSCNLNQFGRGNTCISD-----
OK214_J_116                                             MMLKLRVGVYILLVLLPLTTLQEKKDDASEALVKQSDEKRAEGAIVMPDLTRDTR DGCNNNGCNNTDDCPSGCSCNLNQFGRGNTCISD-----
OK193_E_116                                             MMLKLRVGVYILLVLLPLTTLQEKKDDASEALVKQSDEKRAEGAILTPDLTRDTR DGCNNNGCNNTDDCPSGCSCNLNQFGWGNTCISD-----
OK212_J_133                                             MMLKLRVGVYILLVLLPLTTLQEKKDDASEALVKQSDEKRAEGTIVMPDLTRDTR DSCNNKGCNNTADCPFGCSCNLNPFTHDSTCVSD-----
OK213_E_134                                             MMLKLRVGVYILLVLLPLTTLQEKKDDASEAPVKQSDEKRAEGTIVMPDLTRDTS DSCSNERCNNTADCSTGCSCKFNQARRGETCLSG-----
OK214_J_117                                             MMLKLRVGVYILLVLLPLTTLQEKKDDASEALVKQSDEKRAEGAIVMPDLTRDTR ESCSNNRCNNDTDCSTGCPCQFNQAMWGTTCLRFQPSQL

betulinusAMP44670                                       MMLKLRVVVYILLVLLPLTTLQEKEDDASDALVKQVDEKIAKGAILMPDLSRDTR DPCSSDGCNNDTDCSAGCSCTFNMALRCDYCYCGSS---
betulinusALM87502                                       MMLKLRVVVYILLVLLPLTTLQEKEDDASGALVKQVDEKIAKGAILMPDLSRDTR DPCSSDGCNNDTDCSAGCSCTFNMALRCDYCYCGSS---


[Superfamily M-9] New Paralog
[Framework XVI]
[                                                       /-------Signal-----/--------------Pro--------------/ /---------C----C----CC/--------]
													    
										                
OK214_J_118	                                            --------------------------------QERGEDLFKMYQYLRRALER RRTGEDFLEEC-MGGCAFDFCCKRSLRDTTSD
CebrOK035_J_116                                         MSKLGVALFIFLVLFPLEALQLNGDQSADRRAEERSRVLPELYKNSRRAMER KAWDEEWYERCNAPGCDLHFCCR---------
CebrOK035_J_117                                         MSKLGVALLIFMVLFPLEALEMNEDQSADRRAEKWGGVLHELYKNLRRAMER KTTDQEIYMECRFRGCEYQFCCR---------
litteratusABC74992                                      MPKLGVSLFIFLVLFPLATLQLDGDQSAGRHAQERGEDLFKMYQYLRRALER RRTGEDFLEEC-MGGCAFDFCCKRSLRDTTSD

[Superfamily N-1]  
[Framework XV]
[                                                       /------Signal--------/---------------Pro--------------------//C-----C-------CC----C-C--------------C-C/------]
  
OK213_E_135                                             MPPLKMMLLILLLLLLPLATCDGVVSDGQAIPVGGVPSAVNSRVRRLLGGDKERGRSVAKR CPGPKSCGSGEAEVCCESSDCYCKLLHSQPFSRL--VCVCP------D
OK193_E_117                                             -----------------------VVSDGQAIPVGGVPSAVNSRVRPLLGGDKERGRSVAKR CPGPKSCGSGEAEVCCESSDCYCKLLHSQPFSRL--VCVCP------D
OK193_E_118                                             -------LLILLLLLLPLATCD---GDGQAIPVGGVPSAVNSRVRPLLGGDKERGRSVAKR CPGPKSCGSGEAEVCCESSDCYCKLLHSQPFSRL--VCVCP------D
SRX1323887_E_088                                        MPPLKMMLLILLLLLLPLATCD---ADGQAIPVGGVPSAVNSRVRPLLGGDKERGRSVAKR CPGPKSCGSGEAEVCCESSDCYCKLLHSQPFSRL--VCVCP------D
OK193_E_119                                             MSTLKM-MLLILLLLLPLATFD---SDGQAIPGGGIPSAVNSRVGRLLGGDEKSGRSLEKR CSSGKTCGSVEPVLCCARSDCYCRLIQT--------------------
OK005_J_106                                             ---------LILLLLLPMATFD---SDGQAIPGGGIPSAVNSRV----GGDEKSGRSLEKR CRSGKTCPRVGPDECCERSDCFC-------------------------
OK212_J_134                                             M------MLLILLLLLPLAAFD---GDGQAIEGGGDLSAVSSPFMRLLERYKKNGRSIERS CDSENRCPN---NVCCDGPNCKCLGLPTRISSIVWHVCVCPRPKKKYE
OK214_J_119                                             ------------LLLLPLAAFD---GDGQAIEGGGDLSAVSSPFMRLLERYKKNGRSIERS CDSENRCPN---NVCCDGPNCKCLGLPTRISSIVWHVCVCPRPKKKYE
magusQFQ61126                                           MSTLKM-MLLILLLLLPMATFD---SDGQAIPGGGIPSAVNSRV----GGDEKSGRSLEKR CSSGKTCGSVEPVLCCARSDCYCRLIQTRSYWVP--ICVCP-------
marmoreusP0DM18                                         MSTLKM-MLLILLLLLPLATFD---SDGQAIPGGGIPSAVNSRVGRLLGGDEKSGRSLEKR CSSGKTCGSVEPVLCCARSDCYCRLIQTRSYWVP--ICVCP-------

[Superfamily N-2]  
[Framework XV]
[                                                       /------Signal--------/-----------------Pro----------------//C-----C-------CC----C-C------------C-C------/]

OK212_J_135                                             MSTLGMVLLLFLLLLPLGNSDGDGDRQAMDRDRTAGGARS-----LTRHMDQGRSADKR C-STKKCG----DKCCSSSDCECVVHGGTS-NEVGCSCPITK----
OK214_J_120                                             MSTLGMVMLLFLLLLPLGNSDGDWDRQAMDRDRTAGGVRSAPRLRLRRHMDQGRSADKR C-STKKCG----DKCCSSSDCECVVHGGTS-NEVGCSCPITK----
CebrOK033_J_086                                         MSTLGMVLLLFLILLPLGNSDGDWDRQAMDRDRTAGGVRSAPSLRLRRHIDQGRSADKR C-STKKCG----DKCCSSSDCECVVHGGTS-NEVGCSCPITK----
CebrOK035_J_118                                         MSTLGMVLLLLLLLLPLGNSDGDGDRQVMDRDRTAGGVRSAPSLRLRRRMDQGRSADKR C-STKKCG----DKCCSSSDCECVVHGGTS-NEVGCSCPITK----
OK212_J_136                                             MSTLGMVLLLFLLLLPLGNSDGDGDRQAMDRDRTAGGVRSAPRLRLRRHMDQGRSADKR C-STKLCG----ENCCPSSDCECEVHGGSS-NEVGCSCPITK----
OK213_E_136                                             MSTLGMVLLLFLLLLPLGNSDGDGDRQAMDRDRTAGGVRSAPSLRLRRHMDQGRSADKR C-STKLCG--------------------------------------
OK193_E_120                                             MSTLGMVLLLFLLLLPLGNSDGDGDRQAMDRDRTAGGVRSAPSLRLRRHMDQGRSADKR C-STKKCG----ENCCPRSDCKCDVHGGSS-NEVGCSCPVKK----
SRX1323887_E_089                                        MSTLGMVLLLFLLLLPLGNSDGDGDRQAMDRDRTAGGVRSAPSLRLRRHMDQGRSADKR C-STKKCG----ENCCPRSDCKCDVHGGSS-NEVGCSCPVTK----
CebrOK033_J_087                                         MSTLGMVLLLFLILLPLGNSDGDWDRQAMDRDRTAGGVRSAPSLRLRRHIDQGRSADKR C-STKLCG----ENCCPSSDCECEVHGGSS-NEVGCSCPITK----
OK005_J_107                                             MSTLGMVLLLFLILLPLGNSDGDWDRQAMDRDRTAGGVRSAPRLRLRRHMDQGRSADKR C-STKLCG----ENCCPSSDCECEVHGGSS-NEVGCSCPDLALLWK
OK214_J_121                                             MSTLGMVMLLFLLLLPLGNSDGDWDRQAMDRDRTAGGVRSAPRLRLRRHMDQGRSADKR C-STKLCG----ENCCPSSDCECEVHGGSS-NEVGCSCPDLALLWK
SRX1323887_E_090                                        MSTLGMVLLLFLLLLPLGNSDGDGDRQAMDRDRTAGGVRSAPSLRLRRHMDQGRSADKR C-STIVCG----SKCCSSSDCTCGIVGSQS-NEPSCSCPVGR---K
SRX1323887_E_091                                        MSTLGMLLLLLLILLPLGNSDGDGDRQAMHRDHTAARARSASRLRLKSYMDHGRSADKR C-STIVCG----SKCCSSSDCTCGIVGSQS-NEPSCSCPVGR---K
CebrOK035_J_119                                         MSTLGMVLLLLLLLLPLGNSGGDGDRQAMDRDRTASEARSVPRLHLRRLMDHGRSADKR C-STKQCG----DDCCPSNSCECDVVGSQS-NEVGCSCPVGR---K
OK212_J_137                                             -------------------------RQAMDRDHTASKERGAPILRLRRHMDHGRSINKR C-STKMCG----EDCCPSTSCECETVGSQS-NEVGCSCPV------
CebrOK016_E_065                                         ------------------------------RDRTAARALSASRLPLKSYMDHDRSADKR C-STIMCD----GKCCSSSACTCSYVGQHS-NERSCSCPNGR---K
betulinusALM87496                                       MSTLGMVLLLLLLLLPLGNSDGDGDRQAMDRDRTAGEARSAPRLHLRRHMDHGRSAVKR C-STKVCG----DDCCPSSECECAVHGGTG-NEVGCSCPVRALYRK
betulinusAMP44707                                       MSTLGMVLLLLLLLLPLGNSDGDGDRQAMDRDRTAGEARSAPKLHLRRHVDHGRSAVKR C-STKVCG----DDCCPSTACECEVHGGSS-NEMGCSCPALVLLAK

[Superfamily O1-1]  
[Omega/ Kappa]
[Framework VI/VII]

[                                                       /----------Signal-------/------------Pre-------------/ /-C------C--------CC---C----------C--------]

OK006_E_117                                             MKLTSV-VIVAVLFLAACQLTTS-DGSRGTWKDRAVRSITKVSML--------R WPCKVAGSPC-GLV--SECC-GTCNVLRN----RCV--------
OK214_J_122                                             MKLTSV-VIVAVLFLAACQLTTS-DGSRGTWKDRAVRSITKVSML--------R WPCKVAGSPC-GLV--SECC-GTCNVLRN----RCV--------
OK212_J_138                                             MKLTSV-VIVAVLFLATCQLTTS-DGSRGTWKDRAVRSITKVSML--------R WPCKVAGSPC-GLV--SECC-G----------------------
OK193_E_121                                             MKLTCV-VIVAVLFLTACQLITA-EDSRGTQKHRTLRSTVRRSKS------ELT TRCRPSGSNC-GNI--SICC-GRCVNRR------CT--------
OK193_E_122                                             MKLTCV-VIVAVLLLTACQLITA-DDSRGTQKHRSLRSTTKVSKS--------T -SCMKAGSYCVATT--RICC-GYCAYFGK----ICIDYPKN---
OK193_E_123                                             MKLTCV-VIVAVLLLTACQLITA-DDSRGTQKHRSLRSTTKVSMS--------T -RCKGKGASCLRTA--YDCCTGSCNRGR------CG--------
OK193_E_124                                             MKLTCV-VIVAVLLLTACQLITA-DDSRGTQKHRALRSETKLSMS--------T -RCKGKGASCLRTA--YDCCTGSCNRGR------CG--------
OK005_J_108                                             MKLTCV-VIVVLLLLTTCHLITA-DDSRGTQKHRALGSKTKLSML--------T LRCASYGKPC-GIY--NDCC-NTCDPARK----TCT--------
OK212_J_139                                             -------------------LITA-DDSRGTQKHRALKSDTKLSML--------T LRCASYGKPC-GIY--NDCC-NTCDPARK----TCT--------
OK006_E_118                                             MKLTCV-VIVAVLLLTACQLITA-DDSRGTQKHRALKSDTKISML--------T LRCASYGRPR----------------------------------
OK193_E_125                                             MKLTCV-VIVAVLLLTACQLITA-DDSRGTQKHRALKSDTKLSML--------T LRCASYGKPC-GIY--ND--------------------------
litteratusQ2I2R2                                        MKLTSV-VIVAVLFLAACQLTTS-DGSRGTWKDRAVRSITKVSML--------R WPCKVAGSPC-GLV--SECC-GTCNVLRN----RCV--------
magusQFQ61060                                           MKLTSV-VIVAVLFLATCQLTTS-DGSRGTWKDRAVRSITKVSML--------R WPCKVAGSPC-GLV--SECC-GTCNVLRN----RCV--------

OK005_J_109                                             MKLTCP-LIVGLLFLSACQLTTT-DDSRGRQGYHAVRTGTKMQNNKI---FKLT KRCAAPGAPCSKYD--NECC-DACMLSHP-NPPVCIV-------
OK212_J_140                                             MKLTCP-LIVGLLFLSACQLTTT-DDSRGRQGYHAVRTGTKMQNNKI---FKLT KRCAAPGAPCSKYD--NECC-DACMLSHP-NPPVCIV-------
OK214_J_123                                             MKLTCP-LIVGLLFLSACQLTTT-DDSRGRQGYHAVRTGTKMQNNKI---FKLT KRCAAPGAPCSKYD--NECC-DACMLSHP-NPPVCIV-------
OK213_E_137                                             MKLTCP-LIVGLLFLSACQLTTT-DDSRGRQGYHAVRTGTKMQNNKI---FKLT KRCAAPGAPCSKYD--NECC-DACMLSHP-NPPVCIV-------
OK006_E_119                                             MKLTCP-LIVGLLFLSACQLTTT-DDSRGRQGYHAVRTGTKMQNNKI---FKLT KRCAAPGAPCSKYD--NECC-DACMLSHP-NPPVCIV-------
CebrOK033_J_088                                         MKLTCP-LIVGLLFLSACQLTTT-DDSRGRQGYHAVRTGTKMQNNKI---FKLT KRCAAPGAPCSKYD--NECC-DACMLSHP-NPPVCIV-------
CebrOK035_J_120                                         MKLTCP-LIVGLLFLSTCQLTTT-DDSRGRQGYHAVRTGTKMQNNKI---FKLT KRCAAPGAPCSKYD--NECC-DACMLSHP-NPPVCIV-------
betulinusAMP44713                                       MKLTCT-VIIAVLFLTACQLTTA-VDSRGRQGYRAARARIKMQNDKI---FKLT KRCDAPGAPCSKYD--NECC-DACMLSHP-EPPVCVG-------
OK212_J_141                                             MKRTCA-LIVVLLFLTAYQLTTT-DDSRGRKGYRAERARTRITNSKL---LKLT KRCVEPGSPCSKY-------------------------------
milesQ3YEG3                                             MKLTCA-LIVAMLLLTACQLITT-DDFRGRQQYRTARSRTKMQNYKI---FRLT KRCDAPNAPCEKFD--NDCC-DACMLREK-QQPICAV-------
OK005_J_110                                             MKLTCA-LIVAMLLLTACQLTTT-DDSRGKQEYLTKRSRAKMQRTKL---FKLT KRCDDPGADCEYWE--NNCC-GACQLRGD-NQPICSV-------
OK005_J_111                                             MKLTYA-LIVAMLFLMACQHITT-DDSRGEQKYLAKRSKAKIQNFKL---FKLT KRCDDPGADCEYWE--NNCC-GACQLRGD-NQPICSV-------
OK006_E_120                                             MKLTYA-LIVAMLFLMACQHITT-DDSRGEQKYLAKRSKAKIQNFKL---FKLT KRCDSPDAPCSLYE--GVCC-HVCQLQ-P-GGPICVKG------
SRX1323887_E_092                                        MKRTCA-LIVAVLFLTACQIIAT-NDSRGRQKYPTERLRAKMRNSEL---LKLT KRCDPPGAGCSLWE--SDCC-SHFCILRQ-SGPTCGD-------
SRX1323887_E_093                                        MKLTCA-LIVAMLFLTACQLTTT-DDSRGRQKYPTERLRAKMRNSEL---LKLT KRCDPPGAGCSLWE--SDCC-SHFCILRQ-SGPTCGD-------

CebrOK016_E_066                                         --------------------ITA-DDSRSTQKHRALRSTIKH--------FMLT RYCTPYGGHC-GYH--NDCCSHQCNINRN----KCE--------
OK214_J_124                                             MKLTCV-PIVAMLFLMACQLITA-DYSREKHGYSAEKSSDKIQDSFY---SKLT KRCTDEGGDCDPGN--HNCCRGSCLVLQH--KAICGIVYTMVSR
OK212_J_142                                             MKLTCV-PIVAMLFLMACQLITA-DYSREKHGYSAEKSSDKIQDSFY---SKLT KRCTDEGGDCDPGN--HNCCRGSCLVLQH--KAVCGILYTMVSR
OK006_E_121                                             MKLTCV-PIVAMLFLMACQLITA-DYSREKHGYSAEKSSDKIQDSFY---SKLT KRCTDEGGDCDPGN--HNCCRGSCLVLQH--KAVCGILYTMVSR

OK006_E_122                                             MKLTCV-LIAAGLLLTACQMITA---SEGVEEYPAQRSTDEMGNSEIKPLINLN KRCDPPGSYCGGTVIHRHCCSGRCYLFK------CK--------
OK213_E_138                                             -----------------------------------------MGNSEIKPLINLN KRCDPPGSYCGGTVIHRHCCSGRCYLFK------CK--------
OK214_J_125                                             MKLTCV-LIATGLLLTACQMITA---SEGVEEYPVQRSADEMGNSEIKPLVNLN KRCDPPGSYCGGTVIHRHCCSGRCYLF-----------------
CebrOK014_E_058                                         MKLTCV-LTAAGLLLTACQMITA---SEGVEEYPVQRSTDEMGNSEIKPLVNLN KRCDPPGSYCGGTVIHRHCCSG----------------------
CebrOK014_E_059                                         MKLTCV-LTAAGLLLTACQMITA---SEGVQEYPVQRSADEMGNSEIKPVFSLN KRCASKGSVCGGFI--H---------------------------
CebrOK033_J_089                                         ------------------------------EEYPVQRSADEMGNSEIRPVFSLN KRCASKGSVCGGFI--HICC-NKCRHHA------CT--------

OK006_E_123                                             MKVTCV-LIVAVLILTACQLITA-EYSRDKVEYPAERSRITMKGFR----PTWT KRCSTSSVPC-LQN--SNCCSGTCQHINL-GHKTCM--------
OK213_E_139                                             MKVTCV-LIVAVLILTACQLITA-EYSRDKVEYPAERSRITMKGFR----PTWT KRCSTSSVPC-LQN--SNCCSGTCQHINL-GHKTCM--------
SRX1323887_E_094                                        MKVTCV-LIVAVLILTACQLITA-EYSRDKVEYPAERSRITMKGFR----PTWT KRCSTSSVPC-LQN--SNCCSGTCQHINL-GHKTCM--------
CebrOK014_E_060                                         MKVTCV-LIVAVLILTACQLITA-EYSRDKVEYPAERSRITMKGFR----PTWT KRCSTSSVPC-LQN--SNCCSGTCQHINL-GHKTCM--------
CebrOK016_E_067                                         ---------------------------------PAERSRITMKGFR----PTWT KRCSTSSVPC-LQN--SNCCSGTCQHINL-GHKTCM--------
OK005_J_112                                             ----CV-LIVAVLILTACQLITA-EYSRDKVEYPAERSRITMKGFR----PTWT KRCSTSSVPC-LQN--SNCCSGTCQHINL-GHKTCM--------
CebrOK035_J_121                                         ----------AVLFLTACQLITA-DFFGNKEKHLAMKLRKNVKNS------KLT KSCKPNGETCRRTS--NNCC-NACMLREPPNKPVCSDK------
CebrOK035_J_122                                         MKLTCVMMIVAALLLTACQLSTAAGHGRGKQEDPAGRWSGEMQDFED---LTLA KKCKDGGDLCNLSS--DNCC-SECIDEG--GSGVCAIVPEVV--

[Superfamily O1-2]  
[Mu]
[Framework VI/VII]                                                                                            
[                                                       /---------Signal------/-------------Pro------------/ /--C------C-------CC---C---------C---------]

CebrOK014_E_061                                         MKLTCVLIIAVLFLTACQLTTAETYSRGRQKH----RARRSTD--KNSKWTR E--CTHSGGACN--SHDQCCNAFCD---TATRTCV---------
SRX1323887_E_095                                        MKLTCVLIIAVLFLTACQLTTAETYSRGRQKH----RARRSTD--KNSKWTR E--CTHSGGACN--SHDQCCNAFCD---TATRTCV---------
ebraeusQ9N6A4                                           -----VLIIAVLFLTACQLTTAETYSRGRQKH----RARRSTD--KNSKWTR E--CTHSGGACN--SHDQCCNAFCD---TATRTCV---------
CebrOK016_E_068                                         MKLTCVLIIAVLFLTACQLTTAETYSRGRQKH----RARRSTD--KNSKWTR E--CTRSGGACN--SHNQCCDDFCS---TATSTCV---------
OK213_E_140                                             MKLTCVLIIAVLFLTACQLTTAKTYSRGRQMH----RARRSTD--KNSKWT- --------------------------------------------
OK005_J_113                                             MKLTCVLIIAVLFLTACQLTTAETYSRGRQKH----RARRSTD--KNSKWTR E--CTDSGGACN--SHDQCCNEFCS---TAR-------------
OK213_E_141                                             MKLTCVLIIAVLFLTACQLTTAETYSRGRQKH----RARRSTD--KNSKWTR V--CTDSGGACN--SH----------------------------
OK193_E_126                                             MKLTCVLIIAVLFLTACQLTTAETYSRGRQKH----RARRSTD--KNSKWTR E--CTDSGGACN--SHDQCCNEFCS---TATRTCI---------
ebraeusC7T183                                           -----VLIIAVLFLTACQLTTAETYSRGRQKH----RARRSTD--KNSKWTR E--CTDSGGACN--SHDQCCNEFCS---TATRTCI---------
ebraeusC7T1P5                                           -----VLIIAVLFLTACQLTTAETYSRGRQKH----RARRSTD--RNSKWTR E--CTDSGGACN--SHDQCCNEFCS---TATRTCI---------
OK213_E_142                                             MKLTCVLIIAVLFLTACQLTTAETYSRGKQKY----RVLRSTD--KNSKWTR E--CTDSGGACN--SHDQCCNEFCS---TATRTCI---------
OK213_E_143                                             -----VLIIAVLFLTTCQLTTAETYSRGRQKH----RARRSTA--KNSKWTR E--CTHSGGACN--SRDQCCNVFCD---TATRTC----------
OK213_E_144                                             MKLTRVLIVAVLFLTACQLTAAETSSRSKQKY----RVLRSTD--KNSKWTR E--CTDSGGACN--SHDQCCNAFCD---TATRTC----------
OK213_E_145                                             MKLTRVLIVAVLFLTACQLTTAETYSRGKQKY----RVLRSTD--KNSKWTR E--CTHSGGACN--SHDQCCNAFCD---TATRTCV---------
OK213_E_146                                             MKLTCVMIVAVLFLTACQLTTAEISSRGKQKY----RVLRSAD--ENPKWTR E--CTHSGGACN--SHDQCCNEFCS---TATRTCI---------
CebrOK033_J_090                                         MKLTYVLIVAVLFLTACQLTTAETSSRSKQKY----RVLRSTD--KNSKWTR E--CTPPGGACN--IHPHCCEEFCD---MANNRCLEM-------
OK213_E_147                                             ------------------------------KY----RVLRSTD--KNSKWTR E--CTPPGGACN--IHPHCCEEFCD---MANNRCLEM-------
CebrOK033_J_091                                         ------MIVAVLFLTACQLTTAETSSRSKQKY----RVLRSTD--KNSKWTR E--CTPPGGACN--IHPHCCEEFCD---MANNRCLEM-------
CebrOK035_J_123                                         MKLTRVLIVAVLFLTACQLTAAETSSRSKQKY----RVLRSTD--KNSKWTR E--CTPPGGACN--IHPHCCEEFCD---MANNRCLEM-------
OK006_E_124                                             MKLTRVLIVAVLFLTACQLTAAETSSRSKQKY----RVLRSTD--KNSKWTR E--CTPPGGACN--IHPHCCEEFCD---MANNRCLEM-------
OK212_J_143                                             MKLTRVLIVAVLFLTACQLTAAETSSRSKQKY----RVLRSTD--KNSKWTR E--CTPPGGACN--IHPHCCEEFCD---MANNRCLEM-------
OK214_J_126                                             -------IVAVLFLKACQLTAAETSSRSKQKY----RVLRSTD--KNSKWTR E--CTPPGGACN--IHPHCCEEFCD---MANNRCLEM-------
OK005_J_114                                             MKLTCVLIVAVLFLTACQLTAAETSSRSKQKY----RVLRSTD--KNSKWTR E--CTPPGGACN--IHPHCCEEFCD---MANNRCLEM-------
OK212_J_144                                             MKLTCVMIVAVLFLTACQLTAAETSSRSKQKY----RVLRSTD--KNSKWTR E--CTPPGGACN--IHPHCCEEFCD---MANNRCLEM-------
OK005_J_115                                             MKLTCVMIVAVLFLTACQLTAAETSSRSKQKY----RVLRSTD--KNSKWTR E--CTPPGGACN--IHPHCCEEFCD---MANNRCLEM-------
OK214_J_127                                             MKLTRVLIVAVLFLTACQLTTAETSSRGKQKY----RVLRSTD--KNSKWTR E--CTPPGGACN--IHPHCCEEFCD---MANNRCLEM-------
OK214_J_128                                             MKLTCLMIVAVLFLTACQLSAAETSSRSKQKY----RVLRSTD--KNSKWSR E--CTP--------------------------------------
CebrOK016_E_069                                         MKLTCVLIVAVLFLTACQLTTAETSSRGKQKY----RVLRSAD--ENPKWTR E--CTPPGGACN--IHPHCCEEFCD---MANNRCLEM-------
OK212_J_145                                             MKLTCVMIVAVLFLTACQLTAAETSSRSKQKY----RVLRSTD--KNSKLTR V--CTPPGGTC---------------------------------
CebrOK035_J_124                                         MKLTRVLIVAVLFLTACQLTAAETSSRSKQKY----RVLRSTD--KNSKWTR E--CTPPGGACN--YHYHCCDDFCD---RGRNTCMAN-------
OK212_J_146                                             ------------------LTTAETYSRGKQKH----RVLRSTD--KNSKLTR V--CTPPGGTCT--YHLHCCDLYCN---KTTNVCLER-------
OK214_J_129                                             ------------------LTTAETYSRGKQKH----RVLRSTD--KNSKLTR V--CTPPGGTCT--YHLHCCDLYCN---KTTNVCLER-------
CebrOK033_J_092                                         MKLTCVLIIAVLFLTACQLTTAETYSRGKQKH----RVLRSTD--KNSKLTR V--CTPPGGTCT--YHLHCCDLYCN---KTTNVCLER-------
CebrOK033_J_093                                         ---------------------------SKQKY----RVLRSTD--KNSKLTR V--CTPPGGTCT--YHLHCCDLYCN---KTTNVCLER-------
CebrOK035_J_125                                         MKLTCVMIVAVLFLTACQLTTAETSSRGKQKH----RVLRSAD--KNPKWTR E--CTRPGGACY--YDSHCCRHVCH---EVFNTCM---------
OK212_J_147                                             MKLTCVMIVAVLFLTACQLTTAETSSRGKQKH----RVLRSAD--KNPKWTR E--CTRPGGACY--YDSHCCRHVCH---EVFNTCM---------
CebrOK035_J_126                                         MKLTCLMIVAVLFLTACQLTTAETSSRGKQKH----RVLRSAD--KNPKWTR E--CTRPGGACY--YDSHCCRHVCH---EVFNTCM---------
OK213_E_148                                             MKLTCLMIVAVLFLTACQLTTAETSSRGKQKH----RVLRSAD--KNPKWTR E--CTRPGGACY--YDSHCCRHVCH---EVFNTCM---------
OK213_E_149                                             MKLTCVLIIAVLFLTACQLTTAETSSRGKQKH----RVLRSAD--KNPKWTR E--CTRPGGACY--YDSHCCRHVCH---EVFNTCM---------
OK212_J_148                                             MKLTCVMIVAVLFLTACQLTTAEISSRGKQKH----RVLRSAD--KNPKWTR E--CTRPGGACY--YDSHCCRHVCH---EVFNTCM---------
OK005_J_116                                             MKLTCVMIVAVLFLTACQLTTAEISSRGKQKH----RVLRSAD--KNPKWTR E--CTRPGGACY--YDSHCCRHVCH---EVFNTCM---------
OK006_E_125                                             MKLTCLMIVAVLFLTACQLTTAETYSRGKQKH----RVLRSAD--KNPKWTR E--CTRPGGACY--YDSHCCRHVCH---EVFNTCM---------
OK006_E_126                                             MKLTCVMIVAVLFLTACQLTTAETYSRGKQKH----RVLRSAD--KNPKWTR E--CTRPGGACY--YDSHCCRHVCH---EVFNTCM---------
OK006_E_127                                             MKLTCVLIIAVLFLTACQLTTAETYSRGKQKH----RVLRSAD--KNPKWTR E--CTRPGGACY--YDSHCCRHVCH---EVFNTCM---------
CebrOK014_E_062                                         MKLTCVLIIAVLFLTACQLTTAETSSRGKQKY----RVLRSAD--ENPKWTR E--CTRPGGACY--YDSHCCRHVCH---EVFNTCM---------
CebrOK016_E_070                                         MKLTCVLIVAVLFLTACQLTTAETSSRGKQKY----RVLRSAD--ENPKWTR E--CTRPGGACY--YDSHCCRHVCH---EVFNTCM---------
OK214_J_130                                             MKLTCLMIVAVLFLTACQLTTAETSSRGKQKY----RVLRSAD--ENPKWTR E--CTRPGGACY--YDSHCCRHVCH---EVFNTCM---------
OK006_E_128                                             MKLTCVMIVAVLFLTACQLTTAEISSRGKQKY----RVLRSAD--ENPKWTR E--CTRPGGACY--YDSHCCRHVCH---EVFNTCM---------
OK005_J_117                                             MKLTCVMIVAVLFLTACQLTTAEISSRGKQKY----RVLRSAD--ENPKWTR E--CTRPGGACY--YDSHCCRHVCH---EVFNTCM---------
OK213_E_150                                             MKLTCVMIVAVLFLTACQLTTAEISSRGKQKY----RVLRSAD--ENPKWTR E--CTRPGGACY--YDSHCCRHVCH---EVFNTCM---------
OK005_J_118                                             MKLTCVLIVAVLFLTACQLTAAETSSRSKQKY----RVLRSAD--ENPKWTR E--CTRPGGACY--YDSHCCRHVCH---EVFNTCM---------
OK005_J_119                                             MKLTCVMIVAVLFLTACQLTAAETSSRSKQKY----RVLRSAD--ENPKWTR E--CTRPGGACY--YDSHCCRHVCH---EVFNTCM---------
OK212_J_149                                             MKLTRVLIVAVLFLTACQLTTAETSSRGKQKH----RVLRSAD--KNPKWTR E--CTRPGGACY--YDSHCCRHVCH---EVFNTCM---------
OK214_J_131                                             MKLTRVLIVAVLFLTACQLTTAETSSRGKQKY----RVLRSAD--ENPKWTR E--CTRPGGACY--YDSHCCRHVCH---EVFNTCM---------
CebrOK033_J_094                                         ------MIVAVLFLTACQLTTAETSSRSKQKY----RVLRSTD--KNSKWTR E--CTRPGGACY--YDSHCCRHVCH---EVFNTCM---------
OK213_E_151                                             MKLTRVLIVAVLFLTACQLTAAETSSRSKQKY----RVLRSTD--KNSKWTR E--CTRPGGACY--YDSHCCRHVCH---EVFNTCM---------
OK005_J_120                                             MKLTCVLIVAVLFLTACQLTAAETSSRSKQKY----RVLRSTD--KNSKWTR E--CTRPGGACY--YDSHCCRHVCH---EVFNTCM---------
OK005_J_121                                             MKLTCVMIVAVLFLTACQLTTAEISSRGKQKY----RVLRSTD--KNSKWTR E--CTRPGGACY--YDSHCCRHVCH---EVFNTCM---------
OK005_J_122                                             ------MIVAVLYLTACQLTTAEISSRGKQKH----SVLRSAD--KTPKWTR E--CTRPGGACY--YDSHCCRHVCH---EVFNTCM---------
OK212_J_150                                             ------MIVSVLFLTACRLTTAEISSRGKQKH----RVLRSAD--KNPTWTR E--CTRPGGAC---------------------------------
OK214_J_132                                             --------IAVLFLTACQLTTAETSSRGKQKH----RVLRATD--KNSKWTR E--CTRHGGACY--YDSHCCRHVCH---EVFNTCM---------
OK214_J_133                                             MKLMCLMIVAVLFLTACQLTSAETSSRGKHKH----RFLRSAD--KNPKWTR --------------------------------------------
CebrOK014_E_063                                         MKLTCVLIIAVLFLTACQLTTAETYSRGRQKH----RARRSTD--KNSKMTK K--CTQTNGACY--HRDTCCSKSCN---LTINRCLAS-------
OK006_E_129                                             MKLTCVLIIAVLFLTACQLTTAETYSRGKQKH----RALRSTD--KNSKMTK K--CTQTNGACY--HRDTCCSKSCN---LTINRCLAS-------
OK006_E_130                                             MKLTCVMIVAVLFLTACQLTTAETYSRGKQKH----RALRSTD--KNSKMTK K--CTQTNGACY--HRDTCCSKSCN---LTINRCLAS-------
CebrOK033_J_095                                         MKLTCVLIIVVLFLTACQLTTVGTSSRGKQKH----RALRSTD--KNSKMSK N--CTKTDGACY--HRNTCCSKSCN---LTTKKCLAS-------
CebrOK035_J_127                                         MKLTCVLIIVVLFLTACQLTTVGTSSRGKQKH----RALRSTD--KNSKMSK N--CTKTDGACY--HRNTCCSKSCN---LTTKKCLAS-------
OK214_J_134                                             MKLTCVLIIVVLFLTACQLTTVGTSSRGKQKH----RALRSTD--KNSKMSK N--CTKTDGACY--HRNTCCSKSCN---LTTKKCLAS-------
OK212_J_151                                             MKLTCVLIIVVLFLTACQLTTVGTSSRGKQKH----RALRSTD--KNSKMSK N--CTKTDGACY--HRNTCCSKSCN---LTTKKCLAS-------
OK214_J_135                                             MKLTRVLIVAVLFLTACQLTAAETSSRGKQKH----RGLRAND--QNFQFTR V--CTAPGGTCT--Y-----------------------------
CebrOK035_J_128                                         -----------LFLTACQLTTAETSSRGEQKH----RAPRSTD--KNSRLTK R--CTPPNGYCY--HRYYCCSRACK---LTTKRCL---------
CebrOK035_J_129                                         -------------------TTAETSSRGKQKH----RALRSTD--KNSRMTK R--CTPAGGACY--VKSTCCSIACN---LNTNRCLLW-------
OK212_J_152                                             MKLTCVLIIAVLFLTAYQLTTVETYSRGKWMH----RALRSTG--KNPKVTR E--CSSPDESCT--YHYNCCQLYCN---KE--------------
OK212_J_153                                             ------------------ITAAEISTRIKAND----FFLRLTV--KNSKWTR D--CTPPGGACH--IHSHCCEEFCD---MGNNRCLEM-------
CebrOK035_J_130                                         -----LVILAGLFLTACQLTTADTSSRGKQKH----RALRSTD--KKRWSVG I--CRLPGGLCA--GDASCCEQSCN----IVHRCD---------
SRX1323887_E_096                                        -------IIAVLFLTACQLDTAASYDKGKQKL----PTLRPAD--KHFRLIK R--CNARNSGCS--QHPQCCSGSCN---KTFGVCL---------
CebrOK035_J_131                                         MKLTCALIITVLFLG----ITAD-DSRDKLGY----SVLKSIAGMLNSGTLR T--CRQKSQGCTN-TALCCSGLRCS-GQSQGGVCVSSR------

CebrOK033_J_096                                         -------------------------------Y----HAVRSRDGIRNSKGSR S--CSVDREGCA--TQACCPGLQCV-GNPPGGMCVQDNLILA-H
OK005_J_123                                             MKLTCVMIVAVLFLTACRLITSD-NSRDKQEY----HAVRSRDGIRNSKGSR S--CSVDREGCA--TQACCPGLQCV-GNPPGGMCVQDNLILA-H
OK005_J_124                                             MKLTCVLIVAVLFLTALRLITSD-NSRDKQEY----HAVRSRDGIRNSKGSR S--CSVDREGCA--TQACCPGLQCV-GNPPGGMCVQDNLILA-H
OK214_J_136                                             MKLTCVMIVAVLFLTALRLITSD-NSRDKQEY----HAVRSRDGIRNSKGSR S--CSVDREGCA--TQACCPGLRCV-GNPPGGMCVQDNLILA-H
OK212_J_154                                             MKLTCVMIVAVLFLTACRLITSH-NSRDKQEY----HAVRSRDGIRNSKGSR S--CSVDREGCA--TQACCPGLRCV-GNPPGGMCVQDNLILA-H
praecellensATF27680                                     MKLTCVLIVAVLSLTACQLITAD-YSRDKQEY----LAARFRDGMRNSKVSR E--CREYRQGCA--YTPCCPGLKCR-GTHAGGMCVKT-------
andremeneziATF27442                                     MRLTCVLIVAVLSLTACQLITAD-YSRDKQEY----LAARFRDGMRNSKVSR E--CREYRQGCA--YTPCCPGLKCR-GTNAGGMCVKT-------

CebrOK014_E_064                                         -------------------------SRDKRQY----RAARLRDEMRNFKGAR D--CGEQGQGCY--TRPCCPNLVCRGGGTGGGVCQP--------
CebrOK016_E_071                                         MKLTCVLIISVLFLTASQLITAD-FSRDKRQY----RAARLRDEMRNFKGAR D--CGEQGQGCY--TRPCCPNLVCRGGGTGGGVCQP--------
CebrOK033_J_097                                         MKLTCVLIISVLFLTASQLITAD-FSRDKRQY----RAARLRDEMRNFKGAR D--CGEQGQGCY--TRPCCPNLVCRGGGTGGGVCQP--------
OK212_J_155                                             MKLTCVLIISVLFLTASQLITAH-YSSDKRQY----RAARLRDEMRNLKGAR D--CGQQGQGCY--TRPCCPNLVCRGGGTGGGSCQP--------
SRX1323887_E_097                                        MKLMCVLIIAVLFLTASQLITAD-YSRDQRQY----RAVRLGDEMRNFKGAR D--CGGQGEGCY--TQPCCPGLRCRGGGTGGGVCQL--------
SRX1323887_E_098                                        MKLTCVLIITVLFLTASQLITAD-YSRDQRQY----RAVRLGDEMRNFKGAR D--CGGQGEGCY--TQPCCPGLRCRGGGTGGGVCQL--------
SRX1323887_E_099                                        MKLTCVLIITVLFLTASQLITAD-YSRDQRQY----RAVRLGDEMRNFKGAR N--CGEQGQGCY--TRPCCPGLHCAAGATGGGSCQP--------
OK212_J_156                                             MKLTCVLIISVLFLTASQLITAH-YSSDKRQY----RAARLRDEMRNFKDAR A--CGKEGERCL--IRPCCPDLTCS-G-IIGGKCES--------
SRX1323887_E_100                                        MKLTGVLIISVLLLTASQLITAD-YSRDKRQY----LAMRLRDGLRNFRGVR D--CGEQGEGCR--TRPCCSGLTCV-GTHAGGLCQPE-------
SRX1323887_E_101                                        MKLTCVLIITVLFLTASQLITAD-YSRDKRQY----LAMRLRDGLRNFRGVR D--CGEQGEGCR--TRPCCSGLTCV-GTHAGGLCQPE-------

CebrOK035_J_132                                         MKLTCVLIISVLFLAASQLITAD-YTRNN-----------LRHVMQNLKGAR D--CGERGEGCY--TRPCCPGLECI-GGRPGGLCQY--------
CebrOK035_J_133                                         MKLTCVLIISVLFLAASQLITAD-YTKDN-----------LRHVMQNLKGAR D--CGERGEGCY--TRPCCPGLECI-GGRPGGLCQY--------
CebrOK035_J_134                                         MKLTCVLIISVLFLAASQLITAD-YTRNN-----------LRHVMQNLRGTR D--CGNRGEGCY--TRPCCPGLECI-GGRPGGLCQY--------
CebrOK035_J_135                                         MKLTCVLIISVLFLAASQLITAD-YTKDN-----------LRHVMQNLKGAR D--CGSQGEGCY--SRPCCPGLECI-GGRPGGVCQW--------
CebrOK035_J_136                                         MKLTCVLIISVLFLAASQLITAD-YPRDN-----------LRHVMQNLKGAR D--CGSQGEGCY--SRPCCPGLECI-GGYPGGVCLW--------
CebrOK035_J_137                                         MKLTCVLIISVLFLAASQLITAD-YTRNN-----------LRHVMQNLKGAR D--CGSQGEGCY--SRPCCPGLECI-GGYPGGVCLW--------
CebrOK035_J_138                                         MKLTCVLIISVLFLAASQLITAD-YTKDN-----------LRHVMQNLKGAR D--CGERGEGCY--TRPCCPGLECI-GGYPGGVCLW--------
CebrOK035_J_139                                         MKLTCVLIISVLFLAASQLITAD-YTRNN-----------LRHVMQNLKGAR D--CGERGEGCY--TRPCCPGLECI-GGYPGGVCLW--------
CebrOK035_J_140                                         MKLTCVLIISVLFLAASQLITAD-YPRDN-----------LRHVMQNLRGTR D--CGNRGEGCY--TRPCCPGLKCR-GTHAGGLCR---------
CebrOK035_J_141                                         MKLTCVLIISVLFLAASQLITAD-YTRNN-----------LRHVMQNLKGAR D--CGERGEGCY--TRPCCPGLKCR-GTHAGGLCR---------
CebrOK035_J_142                                         MKLTCVLIISVLFLAASQLITAD-YTKDN-----------LRHVMQNLRGTR D--CGNRGEGCY--TRPCCPGLECR-GTPIGGVCQW--------
CebrOK035_J_143                                         MKLTCVLIISVLFLAASQLITAD-YPRDN-----------LRHVMQNLRGTR D--CGNRGEGCY--TRPCCPGLECR-GTPIGGVCQW--------
CebrOK035_J_144                                         MKLTCVLIISVLFLAASQLITAD-YTKDN-----------LRHVMQNLKGAR D--CGERGEGCY--TRPCCPGLECR-GTPIGGVCQW--------
CebrOK035_J_145                                         ----------VLFLAATQLITAD-YPRDN-----------LRHVMQNLKGAR D--CGNQGEGCR--TRRCCPGLECI-GGYPGGVCQW--------
CebrOK035_J_146                                         -----------LFLAASQLITAD-YTKDD-----------LKHVMQILRGAR N--CATQGQLCW--GRPCCPGLECI-GGRPGGLCQY--------
CebrOK035_J_147                                         ----------------SQLITAD-FSIDN-----------LRHGMQNLRGAR D--CAGQGESCF--TRPCCSGLQCT-GPRPLGVCQ---------

OK005_J_125                                             MKLTRVLIVAVLFLTACQLITSD-YPRDE--Y----RAVTSRFGVRNSKGSR E--CRESGQGCTR-TAPCCPGLNCY-GTRAGGRCS---------
SRX1323887_E_102                                        MKLTYVLIIAVLFLTACQLITAD-DSRDEKES----RAV---DGMQNSEGSR S--CANQGEGCQ--IRPCCGDLKCY-GPSAGKYCKTS-------
OK214_J_137                                             MKLTCVLIIAVLFLMANQLITAD-YSRDEQVY----RAVRLRDAMQKSKGSG S--CAYISEPCD--ILPCCPGLKCN--EDFVPICL---------
OK006_E_131                                             MKLTCVLIIAVLFLMDNQLITAD-YSRDEQVY----RAVRLRDAMQKSKGSG S--CAYISEPCD--ILPCCPGLKCN--EDFVPICL---------
SRX1323887_E_103                                        -----VLIIAVLFLTASELVTAD-YTRDKWQY----RAASLRDAMRNFRDTR A--CSTIGQVCTR-HSPCCRGSFCN---HLGGMCHR--------
CebrOK035_J_148                                         ------------------------------------RAVRSSDKVQNSKSTR G--CSVSGDGCK--TRPCCEGLNCS-GPQQGPVCT---------
SRX1323887_E_104                                        MKLTGVLIISVLLLTASQLITAG-DSGDKQWY----RAVRSILGKRNRLDTR E--CLEEGSGCTYTSDACCPHLRCR-GTHAGAVCVEYQSPI---
CebrOK035_J_149                                         ---------------ACQLIATASYARSERKH----PDLRLSS--RNSKLSK R--CLGSGELCV--RDTSCCSMSCT-----NNICF---------


[Superfamily O1-3]  
[Delta]
[Framework VI/VII]
[                                                       /----Signal------------/------------Pro------------------------//C------C---------CC----C----C------]

OK006_E_132                                             --------VAVLFLTVWTCATA-DDSGNG------LENLF-SKAHHEMKNPKD-SKL-NKR--- CLDGGEICGIL---FPSCCSGW-CIVLVCA------
OK213_E_152                                             MKLTCMMIVAVLFLTVWTCATA-DDSGNG------LEKLF-SNAHHEMKNPKD-SKL-NKR--- CLDGGEICGIL---FPSCCSGW-CIVLVCA------
OK005_J_126                                             MKLTCMMIVAVLFLTAWTFATA-DDSSNG------LENLF-SKAHHEMKNP------------- ------------------------------------
OK213_E_153                                             MKLTCMMIVAVLFLTAWTFATA-DDPRNG------LENLF-SKAHHEMKNPKD-SKL-NKR--- CLDGGEICGIL---FPSCCSGW-CIVLVCA------
OK005_J_127                                             MKLTCVMIIAVLFLTAWTFATA-DDPRNG------LENLF-SKAHHEMKNPKD-SKL-NKR--- CLDAGEMCDLF---NSKCCSGW-CIILFCA------
OK213_E_154                                             MKLTCMMIVAVLFLTAWTFATA-DDPRNG------LENLF-SKAHHEMKNPKD-SKL-NKR--- CLDAGEMCDLF---NSKCCSGW-CIILFCA------
marmoreusBAO02167                                       MKLTCMMIVAVLFLTAWTFATA-DDPRNG------LENLF-SKAHHEMKNPKD-SKL-NQR--- CLDAGEMCDLF---NSKCCSGW-CIILFCA------
marmoreusBAO02097                                       MKLTCMMIVAVLFLTAWTFATA-DDPRNG------LENLF-RKAHHEMKNPKD-SKL-NKR--- CLDAGEMCDLF---NSKCCSGW-CIILFCA------
OK193_E_127                                             MKLTCMMIVAVLFLTAWTFVMA-DDSGNG------LENLF-SKAHHEMKNPKD-SKL-NKR--- CLDAGEMCDLF---NSKCCSGW-CIILFCA------
SRX1323887_E_105                                        MKLTCIMIVALLFLTAWTFATA-DDPRNG------LENLF-SKAHHEMKNPKD-SKL-NKR--- CIDGGEICDIF---FPNCCSGW-CIILVCA------
OK213_E_155                                             MKLTCMMIVAVLFLTAWTFATA-DDPRNG------LENLF-SKAHHEMKNPEA-SKL-NKR--- CKQADEPCSILS--LDQCCSGV-CFGI-CI------
OK213_E_156                                             MKLTCMMIVAVLFLTVWTCATA-DDSGNG------LEKLF-SNAHHEMKNPEA-SKL-NKR--- CKQADEPCSILS--LDQCCSGV-CFGI-CI------
OK193_E_128                                             MKLTCMMIVAVLFLTAWTFVMA-DDSGNG------LENLF-SKAHHEMKNPEA-SKL-NKR--- CPNTGELCDVV---EQNCCYTY-CFIVVCL------
SRX1323887_E_106                                        MKLTCIMIVALLFLTAWTFATA-DDPRNG------LENLF-SKAHHEMKNPEA-SKL-NKR--- CPNTGELCDVV---EQNCCYTY-CFIVVCL------
CebrOK014_E_065                                         MKLTCMMIVAVLFLTAWTFATA-DDPRNG------LGNLF-SNAHHEMKNPEA-SKL-NKRW-- CKQSGEMCNLL---DQNCCDGY-CIVLVCT------
CebrOK016_E_072                                         MKLTCMMIVAVLFLTAWTFATA-DDPRNG------LGNLF-SNAHHEMKNPEA-SKL-NKRW-- CKQSGEMCNLL---DQNCCDGY-CIVLVCT------
CebrOK033_J_098                                         MKLTCMMIVAVLFLTAWTFATA-DDPRNG------LGNLF-SNAHHEMKNPEA-SKL-NKRW-- CKQSGEMCNLL---DQNCCDGY-CIVLVCT------
OK213_E_157                                             MKLTCMMIVAVLFLTAWTFATA-DDPRNG------LGNLF-SNAHHEMKNPEA-SKL-NKRW-- CKQSGEMCNLL---DQNCCEGY-CIVLVCT------
OK005_J_128                                             MKLTCVMIIAVLFLTAWTFATA-DDPRNG------LENLF-SKAHHEMKNPEA-SKL-NKRW-- CKQSGEMCNLL---DQNCCEGY-CIVLVCT------
CebrOK033_J_099                                         MKLTCMMIVAVLFLTAWTFATA-DDSSNG------LENLS-SKAHHNMKNPEA-SKL-NKR--- CRLGAESCEVF---SQNCCQGT-CVFI-CFP-----
OK005_J_129                                             MKLTCMMIVAVFVLTVWTCATA-DDSGNG------LEKLF-SNAHHEVKSPEA-TKL-NKRG-- CK----------------------------------
OK006_E_133                                             MKLTCMMIVAVLFLTAWTFVTA-DDSRNE------LEDPF-LKAFNEMKNPEA-SKL-NKKD-- CLPDGSLCGVN---T---------------------
OK006_E_134                                             MKLTCMMIVAVLFLTAWTFVTA-DDSRNE------LEDPF-LKAFNEMKNPEA-SKL-NQREA- CYNAGSFCGIN---PGLCCSEF--------------
SRX1323887_E_107                                        MKLTCIMIVALLFLTAWTFATA-DDPRNG------LENLF-SKAHHEMKNPEA-SKL-NKKD-- CWPDGSLCGVN---TVDCCN-F-CLIF-CYSM----
SRX1323887_E_108                                        MKLTCIMIVALLFLTAWTFVTA-DDSINGPNNRQMWEKLL-SKARDQMKNPEA-SKL-NKKD-- CWPDGSLCGVN---TVDCCN-F-CLIF-CYSM----
CebrOK035_J_150                                         MKLTCMMTVAVLFLTAWTFATA-EDPRNG------LRDLL-SNAHNEMKDPEA-SKL-NER--- CLGFGEACLIL---YSDCC-GY-CVGAICL------
CebrOK016_E_073                                         --------------------TAVPHSSDV------LENLY-LKAHHEMNNPED-SEL-NKR--- CYDSGTSCNTG----NQCCSGW-CIFV-CL------
CebrOK033_J_100                                         MKLTCMMIVAVLFLTAWTFVTAVPHSSNA------LENLY-LKAHHEMNNPED-SEL-NKR--- CYDSGTSCNTG----NQCCSGW-CIFV-CL------
OK005_J_130                                             -----MMIVAVLFLTAWTFVTAVPDSSNA------LENLY-LKAHHEMNNPED-SEL-NKR--- CYDGGTSCNTG----NQCCSGW-CIFV-CL------
OK213_E_158                                             MKLTCMMIVAVLFLTAWTFVTAVPDSSNA------LENLY-LKAHHEMNNPED-SEL-NKR--- CYDGGTSCNTG----NQCCSGW-CIFV-CL------
CebrOK014_E_066                                         MKLTCMMIVAVLFLTAWTFVTAVPHSSNA------LENLY-LKARHEMENPEA-SKL-NTRYD- CEPPGNFCGMIKI-GPPCCSGW-CFFA-CA------
CebrOK033_J_101                                         MKLTCMMIVAVLFLTAWTFVTAVPHSSNA------LENLY-LKARHEMENPEA-SKL-NTRYD- CEPPGNFCGMIKI-GPPCCSGW-CFFA-CA------
CebrOK016_E_074                                         MKLTCMMIVAVLFLTAWTFVTAVPHSSDV------LENLY-LKARHEMENPEA-SKL-NTRYD- CEPPGNFCGMIKI-GPPCCSGW-CFFA-CA------
CebrOK016_E_075                                         MKLTCMMIVAVLFLTAWTFVTAVPHSSDV------LENLY-LKALHETENHEA-SKL-NVRDDE CEPPGDFCGFFKI-GPPCC-----------------
OK005_J_131                                             MKLTCMMIVAVLFLTAWTFVTAVPHSSDV------LENLY-LKALHETENHEA-SKL-NVRDDE CEPPGDFCGFFKI-GPPCCSGW-CFLW-CA------
OK193_E_129                                             -------IVAVLFLTAWTFVTAVPHSSDV------LENLY-LKALHETENHEA-SKL-NVRDDE CEPPGDFCGFFKI-GPPCCSGW-CFLW-CA------
SRX1323887_E_109                                        --LTCMMIVAVLFLTAWTFVTAVPHSSDV------LENLY-LKALHETENHEA-SKL-NVRDDE CEPPGDFCGFFKI-GPPCCSGW-CFLW-CA------
OK006_E_135                                             ---------------AWTFVTAVPHSSDV------LENLY-LKALHETENHEA-SKL-NVRNDE CEPPGDFCGFFKI-GPPCCSGW-CFLW-CA------
OK212_J_157                                             ------------------------HSSDV------LENLY-LKALHETENHEA-SKL-NVRDDE CEPPGDFCGFFKI-GPSCCSGW-CFLW-CA------
OK213_E_159                                             MKLTCMMIVAVLFLTAWTFVTAVPDSSNA------LENLY-LKALHETENHEA-SKL-NVRDDE CEPPGDFCGFFKI-GPPCCSGW-CFLW-CA------

CebrOK033_J_102                                         MKLTCLMIVTVLFLTAWTFVTA-DDSRNV------LDNPF-LKARHEMKNPQA-SRS-RGR--- CRPRGTLCGFPKPG-PYCCNGW-CIVF-CV------
OK214_J_138                                             MKLTCLMIVTVLFLTAWTFVTA-DDSRNV------LDNPF-LKARHEMKNPQA-SRS-RGR--- CRPRGTLCGFPKPG-PYCCNGW-CIVF-CV------
OK005_J_132                                             MKLTCLMIVTVLFLTAWTFVTA-DDSRNV------LDNPF-LKARHEMKNPQA-SRS-RGR--- CRPRGTLCGFPKPG-PYCCNGW-CIVF-CV------
CebrOK035_J_151                                         MKLTCLMIVTVLFLTAWTFVTA-DDSRNV------LDNPF-LKARHEMKNPQA-SRS-RGR--- CRPRGTLCGFPKPG-PYCCNGW-CFVF-CV------
OK212_J_158                                             MKLTCLMIVTVLFLTAWTFVRA-DDSRNV------LDNPF-LKARHEMKNPQA-SRS-RGR--- CRPRGTLCGFPKPG-PYCCNGW-CIVF-CV------
OK006_E_136                                             MKLTCMMIVAVLFLTAWTFVTA-DDSRNV------LDNPF-LKARHEMKNPQA-SRS-RGR--- CRPRGTLCGFPKPG-PYCCNGW-CIVF-CV------
OK212_J_159                                             MKLTCVMIVAVLFLTAWTFVRA-DDSRNV------LDNPF-LKARHEMKNPQA-SRS-RGR--- CRPRGTLCGFPKPG-PYCCNGW-CIVF-CV------
OK212_J_160                                             MKLTCMMILAALFLTAWTFVRA-DDSRNV------LDNPF-LKARHEMKNPQA-SRS-RGR--- CRPRGTLCGFPKPG-PYCCNGW-CIVF-CV------
CebrOK033_J_103                                         MKLTYIMIVAVLFLTAWTFVTA-DDSRNV------LDNPF-LKARHEMKNPQA-SRS-RGR--- CRPRGTLCGFPKPG-PYCCNGW-CIVF-CV------
OK005_J_133                                             MKLTHIMIIAVLFLTAWTFVTA-DDSRNV------LDNPF-LKARHEMKNPQA-SRS-RGR--- CRPRGTLCGFPKPG-PYCCNGW-CIVF-CV------
CebrOK035_J_152                                         MKLTCMMIVAVLFLTAWTLVMA-DDSNNG------QANLF-SKSRDEMEDPEA-AKL-EKNY-- CQ----------------------------------
CebrOK014_E_067                                         MKLTCMMIVAVLFLTAWTLVMA-DDSNNG------QANLF-SKSRDEMEDPEA-AKL-EKNY-- CQEKWDYCPVPFLGSRYC------------------
CebrOK033_J_104                                         MKLTCMMIVAVLFLTAWTLVMA-DDSNNG------LANLF-SKSRDEMEDPEA-AKL-EKNY-- CQEKWDYCPVPFLGSRYCCDGLFCTLFFCA------
CebrOK016_E_076                                         MKMTYILIVAVLFLTAWTLVMA-DDSNNG------LANLF-SKSRDEMEDPEA-AKL-EKSY-- CQEKWDYCPVPFLGSRYCCDGLFCTLFFCA------
CebrOK033_J_105                                         MKLTCMMIVAVLFLTAWTLVMA-DDSNNG------LANLF-SKSRDEMEDPEA-SKL-EKRD-- CHERWDWCPASILGVIYCCEGLICLIAFCI------
OK005_J_134                                             ----------VLFLTAWTLVMA-DDSNNG------LANHF-LKSRDEMEDPEA-SKL-EKRA-- CSKKWEYCIVPILGFVYCCPGLICGPFVCV------
OK213_E_160                                             MKLTCMMIVAVLFLTAWTLVMA-DDSNNG------LANHF-LKSRDEMEDPEA-SKL-EKRA-- CSKKWEYCIVPILGFVYCCPGLICGPFVCV------
OK193_E_130                                             MKLTCMMIVAVLFLTAWTLVMA-DDSNNG------LANHF-LKSRDEMEDPEA-SKL-EKRA-- CSKKWEYCIVPILGFVYCCPGLICGPFVCV------
OK006_E_137                                             MKLTCMMIVAVLFLTAWTLVMA-DDSNNG------LANHF-LKSRDEMEDPEA-SKL-EKRA-- CSKKWEYCIVPILGFVYCCPGLICGPFVCV------
OK214_J_139                                             MKLTCMMIVAVLFLTAWTLVMA-DDSNNG------LANHF-LKSRDEMEDPEA-SKL-EKRA-- CSKKWEYCIVPILGFVYCCPGLICGPFVCV------
marmoreusQ26443                                         MKLTCMMIVAVLFLTAWTLVMA-DDSNNG------LANHF-LKSRDEMEDPEA-SKL-EKRA-- CSKKWEYCIVPILGFVYCCPGLICGPFVCV------
marmoreusBAO02102                                       MKLTCMMIVAVLFLTAWTLVMA-DDSNNG------LANHF-LESRDEMEDPEA-SKL-EKRA-- CSKKWEYCIVPILGFVYCCPGLICGPFVCV------
OK212_J_161                                             -----MMIVAVLFLTAWTLVMA-DDSNNG------LANHF-SKSRDEMEDPEA-SKL-EKRA-- CSKKWEYCIVPILGFVYCCPGLICGPFVCV------
SRX1323887_E_110                                        MKMTYILIVAVLFLTAWTLVMA-DDSNNG------LANHF-SKSRDEMEDPEA-SKL-EKRA-- CRKKWEYCIVPIIGFIYCCPGLICGPFVCV------

OK005_J_135                                             --------------------------------------LF-SKAREELKNPED-DILNNNKR-- CVGENEPCIIPLLGTIICCTGV-CLIV-CV-----G
OK006_E_138                                             MKLTCMMIVAVLFLTAWTFVTA-EDSNNG------LANLF-SKAREELKNPTD-DILNNNKR-- CVGENEPCIIPLLGTIICCTGV-CLIV-CV-----G
CebrOK033_J_106                                         ---------------AWTFVTA-DDSKNE------LAKYL-SKARDEMNNPET-SKL-DKKW-- CIADGHACIVPILGSAFCCSGF-CLRV-CV------
CebrOK035_J_153                                         MKLTCILIVAVLFLTAWTFVTA-DDSKNE------LAKYL-SKARDEMNNPET-SKL-DKKW-- CIADGHACIVPILGSAFCCSGF-CLRV-CV------
OK214_J_140                                             ---------AVLFLTAWTFVTA-DDSKNE------LAKYL-SKARDEMNNPET-SKL-DKKW-- CIADGHACIVPILGSAFCCSGF-CLRV-CV------
OK212_J_162                                             MKLTYMMIVTVLILTTWTVVMA-DDPKNG------LEILF-SKARDEMKNPEA-SKL-NKKT-- CLGKNALCGAPGVGVLVCCSFK-CVVV-CV------
CebrOK014_E_068                                         MKLTYIMIVAVLLLTAWTFVTA-DDYKYG------LENRF-SKARNEVENPKA-SKL-HQKR-- CVQTGSSCPST----NGCCDGL-CNVNRCA------
CebrOK016_E_077                                         MKMTYILIVAVLFLTAWTSVTA-GDFKNK------LKNLS-LKARKEVENPKA-SKL-HQKR-- CVQTGGSCPST----NGCCNGL-CNVNRCA------
OK006_E_139                                             MKMTYILIVAVLFLTAWTSVTA-GDFKNK------LKNLS-LKARKEVENPKA-SKL-HQKR-- CVQTGGSCPST----NGCCNGL-CNVNRCA------
ebraeusAFQ98200                                         ----CILIVAVLFLTAWTSVTA-GDFKNK------LKNLS-LKARKEVENPKA-SKL-HQKR-- CVQTGGSCPST----NGCCNGL-CNVNRCA------
CebrOK014_E_069                                         MKMTYILIVAVLFLTAWTSVTA-GDFKNK------LKNLS-LKARKEVENPKA-SKL-HQKR-- CVQTGSSCPST----TGCCNGL-CNVDKCT------
OK193_E_131                                             MKMTYILIVAVLFLTAWTSVTA-GDFKNK------LKNLS-LKARKEVENPKA-SKL-HQKR-- CVQTGGSCPST----TGCCNGL-CNVDKCT------
CebrOK014_E_070                                         MKLTCMMIVAVLFLTAWTSVTA-GDFKNK------LKNLS-LKARKEVENPKA-SKL-HQKR-- CVQTGSSCPST----TGCCSGL-CNVNKCT------
magusQFQ61069                                           MKLTCMMIVAVLFLTAWTSVTA-GDFKNK------LKNLS-LKARKEVENPKA-SKL-HQKR-- CVQTGGSCPST----TGCCNGL-CNVDKCT------
OK005_J_136                                             --------------------TA-GDFKNK------LKNLS-LKACNEVETPQA-SKL-HQKA-- CVNRGDPCQRT----VRCCSRR-CGVNSCA------
CebrOK014_E_071                                         MKMTYILIVAVLFLTAWTSVTA-GDFKNK------LKNLS-LKARKEVENPKA-SKL-HQKA-- CVNRGDPCQRT----VRCCSRR-CGINGCT------
CebrOK016_E_078                                         MKMTYILIVAVLFLTAWTSVTA-GDFKNK------LKNLS-LKARKEVENPKA-SKL-HQKA-- CVNRGDPCQRT----VRCCSRR-CGINGCT------
OK006_E_140                                             MKMTYILIVAVLFLTAWTSVTA-GDFKNK------LKNLS-LKARKEVENPKA-SKL-HQKA-- CVNRGDPCQRT----VRCCSRR-CGINGCT------
OK193_E_132                                             MKMTYILIVAVLFLTAWTSVTA-GDFKNK------LKNLS-LKARKEVENPKA-SKL-HQKA-- CVNRGDPCQRT----VRCCSRR-CGVNSCA------
OK213_E_161                                             MKMTYILIVAVLFLTAWTSVTA-GDFKNK------LKNLS-LKARKEVENPKA-SKL-HQKA-- CVNRGDPCQRT----VRCCSRR-CGVNSCA------
SRX1323887_E_111                                        MKMTYILIVAVLFLTAWTSVTA-GDFKNK------LKNLS-LKARKEVENPKA-SKL-HQKA-- CVNRGDPCQRT----VRCCSRR-CGVNSCA------
CebrOK014_E_072                                         MKLTCMMIVAVLFLTAWTSVTA-GDFKNK------LKNLS-LKARKEVENPKA-SKL-HQKA-- CVNRGDPCQRT----VRCCSRR-CGINGCT------
CebrOK033_J_107                                         MKLAYILIVAVLFLTAWTSVTA-GDFKNV------LENLS-LKARKEVENPKA-SKL-HQKR-- CVEAGDPCQTN----VRCCDGM-CGYNGCA------
OK005_J_137                                             MKLAYILIIAVLFLTAWTSVTA-GDFKNV------LENLS-LKARKEVENPKA-SKL-HQKR-- CAEAGDPCQTN----VRCCDGM-CGYNGCA------
CebrOK033_J_108                                         MKMTYILIVAVLFLTAWTSVTA-GDFKNV------LENLS-LKARKEVENPKA-SKL-HQKR-- CVEAGDPCQTN----VRCCDGM-CGYNGCA------
OK214_J_141                                             MKMTYILIVAVLFLTAWTSVTA-GDFKNV------LENLS-LKARKEVENPKA-SKL-HQKR-- CAEAGDPCQTN----VRCCDGM-CGYNGCA------
OK214_J_142                                             MKLAYILIVAVLFLTAWTSVTA-GDFKNV------LENLS-LKARKEVENPKA-SKL-HQKR-- CVGAGDLCQAT----VKCCSRI-CGFNTCA------
OK214_J_143                                             MKMTYILIVAVLFLTAWTSVTA-GDFKNV------LENLS-LKARKEVENPKA-SKL-HQKR-- CVGAGDLCQAT----VKCCSRI-CGFNTCA------
OK193_E_133                                             MKLTYIMIVAVLLLTAWTFVTA-DDYKYG------LENRF-SKARNEVENPKA-SKL-HQKA-- CVNRGDPCQRT----VRCCSRR-CGVNSCA------
OK006_E_141                                             --------------------------------------------RKEVENPKA-SKL-HEKS-- CIRKGEPCNSS----VPCCSGI-CGYFNCA------
CebrOK035_J_154                                         --------VAVLFLTTWTFVTA-ADSINE------LENLS-SKARNEVDNPKA-SKL-HKKT-- CREKGEPCSVY----VECCSRI-CGYYACA------

CebrOK033_J_109                                         MKLTYIMIVAVLFLTAWTFVTA-DDYKYG------LKNRF-SKARNEVENPKA-SEL-DKRS-- CYEAGEFCFFSVPGLFICCSSV-CLFHVCL------
OK214_J_144                                             MKLTYIMIVAVLFLTAWTFVTA-DDYKYG------LKNRF-SKARNEVENPKA-SEL-DKRS-- CYEAGEFCFFSIPGLFICCSSV-CLFHVCL------
OK212_J_163                                             MKLTYIMIVAVLFLTAWTFVRA-DDYKYG------LKNRF-SKARNEVENPKA-SEL-DKRS-- CYEAGEFCFFSVPGLFICCSSV-CLFHVCL------
CebrOK014_E_073                                         MKLTYIMIVAVLLLTAWTFVTA-DDYKYG------LENRF-SKARNEVENPKA-SEL-DKRS-- CYEAGEFCFFSVPGLFICCSSV-CLFHVCL------
CebrOK016_E_079                                         MKLTYIMIVAVLLLTAWTFVTA-DDYKYG------LENRF-SKARNEVENPKA-SEL-DKRS-- CYEAGEFCFFSVPGLFICCSSV-CLFHVCL------
OK193_E_134                                             MKLTYIMIVAVLLLTAWTFVTA-DDYKYG------LENRF-SKARNEVENPKA-SEL-DKRS-- CYEAGEFCFFSVPGLFICCSSV-CLFHVCL------
OK213_E_162                                             MKLTYIMIVAVLLLTAWTFVTA-DDYKYG------LENRF-SKARNEVENPKA-SEL-DKRS-- CYEAGEFCFFSVPGLFICCSSV-CLFHVCL------
SRX1323887_E_112                                        -----------------TFVTA-DDYKYG------LENRF-SKARNEVENPKA-SEL-DKRS-- CYEAGEFCFFSVPGLFICCSSV-CLFHVCL------
OK006_E_142                                             MKMTYIMIVAVLLLTAWTFVTA-DDYKYG------LENRF-SKARNEVENPKA-SEL-DKRS-- CYEAGEFCFFSVPGLFICCSSV-CLFHVCL------
ebraeusAFQ98219                                         ----CIMIVAVLLLTAWTFVTA-DDYKYG------LENRF-SKARNEVENPKA-SEL-DKRS-- CYEAGEFCFFSVPGLFICCSSV-CLFHVCL------
OK005_J_138                                             MKLTYIMIVAVLLLTAWTFVTA-DDYKYG------LENRF-SKARNEVENPKA-SEL-DKRS-- CYEAGEFCFFSIPGLFICCSSV-CLFHVCL------
CebrOK035_J_155                                         -----MMIVAALFLTAWTFVTA-DDYKYG------LENRF-SKARNEVENPKA-SEL-DKRS-- CYEAGEFCFFSVPGLFICCSSV-CLFHVCL------
OK005_J_139                                             MKLTCMMIVAVLFLTAWTFVTA-DDYKYG------LENRF-SKARNEVENPKA-SEL-DKRS-- CYEAGEFCFFSIPGLFICCSSV-CLFHVCL------
ebraeusAFQ98181                                         ----CIMIVAVLLLTAWTFVTA-DDYKYG------LENRF-SKARNEVENPKA-SEL-DKRS-- CYGAGEFCFFSVPGLFICCSSV-CLFHVCL------
ebraeusAFQ98180                                         ----CIMIVAVLLLTAWTFVTA-DDYKYG------LENRF-SKARNEVENPKA-SEL-DKGS-- CYEAGEFCFFSVPGLFICCSSV-CLFHVCL------
OK212_J_164                                             MKLTCVMIVAVLFLTAWTFVRA-DDYKYG------LKNRF-SKARNEVENPKA-SEL-DKRS-- CYEAGEFCFFSVPGLFICCSSV-CLFHVCL------

CebrOK033_J_110                                         MKLTCMMILAALFLTAWTFVTA-DDYINGPDNRGIWGKPS-SKARDEMKNPKD-SRI-ERVHS- ------------------------------------
CebrOK033_J_111                                         MKLTCMMILAALFLTAWTFVTA-DDSINGPDNRGIWGKPS-SKARDEMKNPKD-SRI-ERVHS- ------------------------------------
CebrOK035_J_156                                         MKLTCMMIVAALFLTAWTFVTA-DDYINGPDNRGIWGKPS-SKARDEMKNPKD-SEL---RG-- CIPSGVRCSPM--DHLLCCRGM-CSFF-CL------
OK193_E_135                                             ---TCMVIVAALFLTAWTFVTA-DDSINGPDNRGIWGKPS-SKARDEMKNPKD-SEW---KW-- CHPKGEICFFK--QYIPCCSGK-CEVV-CL------
OK213_E_163                                             MKLTCMMIVAALFLTAWTFVTA-DDSINGPDNRGIWGKPS-AKARDEMKNPKD-SEW---KW-- CHPRGEICFFK--QYIPCCSGK-CEVV-CL------
ventricosusQ9BPA0                                       MKLMCMMIVAVLFLTAWTFVTA-DDSINGPENRRIWEKLL-SKTRDEMKNPEA-SKL-NKKE-- CRQPGEFCFPV---VAKCCGGT-CLVI-CI------
magusDAC80587                                           MKLTCMMIVAVLFLTAWTFVTA-DDSINGPENRRIREKLL-LKARDEMKNPEA-SQL---SW-- CIPSGDLCFPS--DRIQCCSGK-CTFV-CM------
CebrOK016_E_080                                         MKLTCMMIVAVLFLTAWTFVTA-DDSKNALENRGGWGKPF-PEARDEMKNPKA-SEL---RE-- CSSYDEYCFPG---IRDCCSGF-CFII-CIPELPDL

CebrOK035_J_157                                         MKLTCILAVALLFLTAWTLVMA-DDSTGS-ENRGLWETLF-PKARDEVEDPEG-SEV-KKRD-- C-----------------------------------
CebrOK035_J_158                                         MK----LIVAVLFLTAWTFVTA-DDSTGS-ENRGLWETLF-PKARDEVENPEG-SEV-KKRD-- CHESGEFCGIPGVKNGLCCSQS-CALF-CTPKW---
CebrOK035_J_159                                         MKLTCLMIVTVLFLTAWTFVTA-DDSTGS-ENRGLWETLF-PKARDEVENPEG-SEV-KKRD-- CHESGEFCGIPGVKNGLCCSQS-CALF-CTPKW---

OK005_J_140                                             MKLTCMMIVAVLFLTAWTFGRA-DDSKYA------LERLF-PESRDEMKDPEALASG-EKKA-- CLGLGEICA---------------------------
OK214_J_145                                             MKLTCVVIVAV-------FLTA-DDSKYA------LERLF-PESRDEMKDPEALASG-EKRA-- CLGLGQVCAIPFIAGFVCCSGL-CLVL-CS------
CebrOK035_J_160                                         MK----LIVAVLFLTAWTFVTA-DDSRNG------LEYLF-PKAHYEM-NLEA-SRL-NKKSG- CLDRGQLCGIKILG--RCCVNL-CLLV-CL------
CebrOK035_J_161                                         MK----LIVAVLFLTAWTFVTA-DDSRNG------LEYLS-PKAHYEM-NPEA-SRL-NKKRD- CLDRGQVCGVKILG--RCCVNL-CLFV-CL------
CebrOK035_J_162                                         MK----LIVAVLFLTAWTFVTA-DDSRNG------LEYLS-PKAHYEM-NPEA-SRL-NKKRD- CLPRGHVCGINILG--RCCTNM-CILF-CL------
CebrOK035_J_163                                         MK----LIVAVLFLTAWTFVTA-DDSRNE------LENLF-PKARHEM-DPEA-SEL-NKKQD- CLAGSQFCGFPKIG-PTCCSGW-CLFV-CL------

CebrOK035_J_164                                         MKMTYILIVAVLFLTAWTSVTA-GDFKNGPKNRQIWEKVL-SKARDEMKNPEA-SKL-DKR--- CRAFGKLCGIGSLG-LKCCNGP-CQIV-CMNWK---
CebrOK014_E_074                                         MKLTCMMIVAVLFLTAWTFVMA-DDPRDGPDTAVRGGKRF-WKARNEM-NSAA-SKL-NKRE-- CLEADYYCVLPFVGNGMCCSGI-CVFV-CIPQAH--
OK193_E_136                                             MKLTCMMIVAVLFLTAWTFVMA-DDPRDGPDTAVRGGKRF-WKARNEM-NSAA-SKL-NKRE-- CLEADYYCVLPFVGNGMCCSGI-CVFV-CIAQKY--
OK213_E_164                                             MKLTCMMIVAVLFLTAWTFVMA-DDPRDGPDTAVRGGKRF-WKARNEM-NSAA-SKL-NKRE-- CLEADYYCVLPFVGNGMCCSGI-CVFV-CIAQKY--
OK005_J_141                                             -----MMIVAVLFLTAWTFVMA-DDPRDGPDTAVRGGKRF-WKARNEM-NSAA-SKL-NKRE-- CLEADYYCVLPFVGNGMCCSGI-CVFV-CIAQKY--
SRX1323887_E_113                                        MKLTCIMIVALLFLTAWTFVMA-DDPRDGPDTAVRGGKRF-WKARNEM-NSAA-SKL-NKRE-- CLEADYYCVLPFVGNGMCCSGI-CVFV-CIAQKY--
CebrOK033_J_112                                         --------VAVLFLTAWTFVMA-DDPRDGPDTAVRGGKRF-WKARNEM-NSAA-SKL-DKRE-- CVEDDYYCVLPFVGNGMCCSGI-CVFV-CIAQKY--
OK193_E_137                                             -------IVAVLFLTAWTFVMA-DDPRDGPDTVVRGGKLF-SKARDEM-NPAA-SKL-NERD-- CLEPDYVCGIPFVFNGLCCSGI-CVFI-CIAQKY--
OK213_E_165                                             MKLTCMMIVAVLFLTAWTFVMA-DDPRDGPDTVVRGGKLF-SKARDEM-NPAA-SKL-NERD-- CLEPD-------------------------------
OK005_J_142                                             ----------------WTFVTA-DKSRHGPDTAGGWRKLF-TKARYEM-NPAA-SKL-NERD-- CLEPDYVCGIPFVFNGLCCSGI-CVFI-CIAQKY--
CebrOK035_J_165                                         -------------LTAWTFVKA-DDPRDGPDTAGGSGKLF-SEARDEMKNREA-SKL-NERG-- CLEVGKFCGIPFVKNWLCCSQN-CLSF-CAPKY---
CebrOK016_E_081                                         MKLTCMMIVAVLFLTA----SA-DDSRNG------FENRNGERNENEMKNLEA-SKL-NRRDGG CVDGGEFCGFPKIG-GPCCSGW-CFFV-CL------
CebrOK016_E_082                                         MKLTCMMIVAVLFLTAWTFVTA-DDFRNG------LEN------RNEQERNEN-EMR-DRRD-- CQDSGVVCGFPKPE-PHCCSGW-CLFV-CA------

OK005_J_143                                             -------------------VTA-DDSRYG------LKDLF-PKERHEMKNPEA-SKL-NQREA- CYNAGSFCGIH---PGLCCSEF-CILW-CITFVDSG
OK214_J_146                                             -------------------VTA-DDSRYG------LKDLF-PKERHEMKNPEA-SKL-NQREA- CYNAGSFCGIH---PGLCCSEF-CILW-CITFVDSG
OK193_E_138                                             -------------------------------------DLF-PKERHEMNNPEA-SKL-NQREA- CYNAGSFCGIH---PGLCCSEF-CILW-CITFVDSG

[Superfamily O1-5]  
[No Framework]                                                                                     
[                   			                        /-----Signal---------/----------Propep-----------/ /CCC---CC---C-]

OK005_J_144                                             MKLTCMIIVVLCLMACQLVTADDPRSVLPASDLLGNIVASAKSSDPNFGR GCCCVSDCCP--CGD
OK005_J_145                                             MKLTCMIIVVLCLMACQLVTADYPRGVLPASDHLGNVAASAKSSDPNFGR GCCCTSDCCP--CDD

ermineusAXL95590                                        MKLTCMIIVVLCLMACPLITADYPR----ASDLV-NVAAYGKSSDPISRA IVCCIYGTCPDEC-R-
ermineusAXL95506                                        MKLTCMIIVVLCLMACPLITADYPR----ASDLV-NVAAYGKSSDPISRA IVCCIYGNCPDEC-R-

[Superfamily O1-7 b]  
[Framework XI]
[                                                       /------Signal--------/------------Pro----------/ /---C------C-----CC----CC------C------C]
								                        
OK212_J_165                                             MKLTCMIIAVLFLMACQLITADDPIDKQENRATRLRDIMRRPKDYGAR AHLPCKQLNESCPSHRECCPGLQCCGYKGGSCMINDPGC
OK214_J_147                                             MKLTCMIIAVLFLMACQLITADDPIDKQENRATRLRDIMRRPKDYGAR AHLPCKQLNESCPSHRECCPGLQCCGYKGGSCMINDPGC
OK005_J_146                                             MKLTCMIIAVLFLMACQLITADDPIDKQENRATRLRDIMRRPKDYGAR AHLPCKQLNESCPSHRECCPGLQCCGYKGGSCMINDPGC
CebrOK033_J_113	                                        MKLTCMIIAVLFLMACQLITADDPIDKQENRATRLRDIMRRPKDYGAR AHLPCKQLNESCPSHRECCPGLQCCGYKGGSCMINDPGC
CebrOK035_J_166	                                        MKLTCMIIAVLFLMACQLITADDPIDKQENRATRLRDIMRRPKDYGAR AHLPCKQLNESCPSHRVCCPGLQCCGYKGGSCMINDPGC
V_1302_108                                              MKLTCMIIAVLFLMACQLITADYPRDKQENHALRLRDMIRNSR---SR EHRSCRNDRESCPSNMRCCPGLKCCGFKGGACMPRNPGC
A_0039_141                                              MKLTCMIIAVLFLMACQLITADYPRDKQENHAVRLRDMIRNSR---SR EHRSCRNDGESCPSHMRCCPGLKCCGFKGGACMPSNPGC

[Superfamily O1-9]   
[Framework VI/VII]
[                                                       /-------Signal-------/------------Pro---------------/ /C------C--------CC---C----C--]
								                        
OK214_J_148                                             MNVSSVLIVAMLTLTAGQLISAYSHYSEDVQIPPSARSADEMENSENVKLSKR KCVEMGKFCGAIFHSSLCCGKLCLFHYCHLP
CebrOK033_J_114                                         MNVSSVLIVAMLTLTAGQLISAYSHYSEDVQIPPPARSADEMENSVNVKLSKR KCLEMGKFCGAIFHSSLCC------------
CebrOK014_E_075                                         MKVSSVLIVAMLTLTAGQLISASSHYSKDVQILPSVRSADEVKNSENVKLSKR KCVEQWKYCTQ---ESLCCAGLCLFSFCIL-
CebrOK033_J_115                                         MKVSSVLIVAMLTLTAGQLISASSHYSKDVQILPSVRSADEVKNSENVKLSKR KCVEQWKYCTQ---ESLCCAGLCLFSFCIL-
CebrOK016_E_083                                         MKVSSVLIVAMLTLTAGQLISASSHYSKDVQILPSVRSADEVKNSENVKLSKR KCVEQWKYCTR---ESLCCAGLCLFSFCIL-
CebrOK033_J_116                                         MKVSSVLIVAMLTLTAGQLISAYSHYSEDVQI-PPARSADEMENSVNVKLSKR KCVEQWKYCTQ---ESLCCAGLCLFSFCIL-
praecellensATF27691                                     MKVSSVLIVAMLTLTACQLIGASSHYSQDVQMAPFVRSADEMEDSENVKLSKR KCVADWHFCGLFIFSPLCCTKLCLLTVCFA-
V_1302_003                                              MNVSSVLIVAMLTLTAGQLIRAYSHYSEEVQMAPFERSADEMENSENVQLSKR KCLEKWKFCGTLFASALCCGKLCLFHVCFL-
A_0055_016                                              MNVSSVLIVAMLTLTAGQLIRAYSHYSEEVQMAPFERSADEMENSENVKLSKR KCLEQWKFCGSILASALCCGKLCLFNVCFI-

[Superfamily O2-1 (Contryphan)]
[Framework XV] 
[                                                       /-----------Signal-------/------------Pro---------//C------C-----CC----C-C-----C-------C-]
													    
SRX1323887_E_114                                        MMKKLIMLILVATALLSTQVMVGGDGEKPVMGK---NAARRLLASMRRDP- CKTENYLCQEDDECCPGLDCRCTVNANCSP-SHIMCKR
betulinusAMP44731                                       -MKTLTILILVATALLSTHVMVGGEGEKPLMGR---NAANRLLASMRGKR- CKTRDYLCQRDEECCSGLDCRCTVHSNCSP-PHIQCK-
distansAGG19146                                         -MEKLTILILVATALLSIQVMVRGDGEKPLMGRIKRNAAAGLSALIRGKR- CKGASALCEEDGECCSG-DCKCMHASGCTNDINLRCAA
CebrOK035_J_167                                         -MKNLTILILVATALLSIQVMVGGDGEKPLMGRIKRTAANGLSALMRGKR- CKGKGSTCRVDSECCSG-ECHCRNAADCAG-FAPECM-
rattusAGK23199                                          -MEKLTILILVATVLLAIQVLVQSDGEKPLKGRVKQNAAKRLSALLRGPRE CTPMHRACEEDEECCPNLECKCSNNPDCQS--GYKCRP
CebrOK035_J_168                                         -MEKLTILILIATVLLAIQVLVQSDGEKPLKGRVKQNAAKRLWALMKGPRQ CIPWNQHCDEDEECCPNLECKCFTAPDCKS--GYKCRP
CebrOK035_J_169                                         -MEKLTVLILVATVLLTIQVLAKSDGDKHLKRRPNQYASKRLSALMRGQRQ CIAQGFGCEEDEECCSNLWCKCTGSPLCT---LYKCKP
variusAGK23204                                          -MEKLTVLILVATVLLTIQVLGQSDGDKHLKRRPKQYATKRLSALMKGHRQ CTGAGFECEETPECCPNLTCKCSGSPLCA---RYRCKP

[Superfamily O2-2 (Contryphan)]
[Framework VI/VII] 
[                                                       /-------Signal-----/-----------Pro----------/ /-----C------C-----CC------C------C---------]
										                										                
CebrOK033_J_117                                         MEKLTILLLVALVLMSIQALIQ---EKRQQAKINFSSKRKPSAKR WWGHDECTYWLGHCMVDSECCSD---SCEER--FCGLW-------
CebrOK035_J_170                                         MEKLTILLLVALVLMSIQALIQ---EKRQQAKINFSSKRKPSAKR WWGHDECTYWLGHCMVDSECCSD---SCEER--FCGLW-------
OK214_J_149                                             MEKLTILLLVALVLMSIQALIQ---EKRQQAKINFSSKRKPSAKR WWGHDECTYWLGHCMVDSECCSD---SCEER--FCGLW-------
OK006_E_143                                             MEKLTILLLVALVLMSIQALIQ---EKRQQAKINFSSKRKPSAKR WWGHDECTYWLGHCMVDSECCSD---SCEER--FCGLW-------
OK212_J_166                                             MQKLTILLLVALVLMSIQALIQ---EKRQQAKINLSSKRKPSAKR WWGHDECTYWLGHCMVDSECCSD---SCEER--FCGLW-------
CebrOK014_E_076                                         MEKLTILLLVALVLMSTQALIQ---EKRQQAKINLSSKRKLSAKR WWGHDECTYWLGHCMVDSECCSD---SCEEM--FCGLW-------
CebrOK016_E_084                                         MEKLTILLLVAAVLMSTQALIQ---EKRQQAKINLSSKRKLSAKR WWGHDECTYWLGHCMVDSECCSD---SCEEM--FCGLW-------
SRX1323887_E_115                                        MEKLTILLLVAAVLMSTQALIQ---EKRQQAKINLSSKRKLSAKR WWGHDECTYWLGHCMVDSECCSD---SCEEM--FCGLW-------
OK213_E_166                                             MEKLTILLLVALVLMSTQALIQ---EKRQQAKINLSSKRKPSAKR WWGHDECTYWLGHCMVDSECCSD---SCEEM--FCGLW-------
CebrOK014_E_077                                         MEKLTILLLVAAVLMSTQALIQ---DQRQKAKINLFSKRQAYARD WW-DDGCSVW-GPCTVNAECCSG---DCHET--CIFGWEV-----
CebrOK033_J_118                                         MEKLTILLLVAAVLMSTQALIQ---DQRQKAKINLFSKRQAYARD WW-DDGCSVW-GPCTVNAECCSG---DCHET--CIFGWEV-----
CebrOK016_E_085                                         MEKLTILLLVAAVLMSTQALIQ---EQRQKAKINLFSKRKPSAER WWGENDCS-WTGPCTVNAECCLG---VCDET---C-IWG------
CebrOK033_J_119                                         ----------------------------QKAKINLVSKRKPSAER WWGENDCS-WTGPCTVNAECCLG---VCDET---C-IWG------
CebrOK033_J_120                                         MEKLTILLLVAAVLMSTQALIQ---EQRQKAEINLFSKRKPSAER WWVDSECTSFWGSCTVDADCCFN---SCDET--YGYCWPSL----

CebrOK033_J_121                                         MEKLTILLLVAAVLMSTQALNQ---EQHQRAKINLLSKRKPPAER WWRWGGCMAWFGLCSKDSECCSN---SCDVT--RCELYPFPSRY-
OK005_J_147                                             MEKLAILLLVAAVLMSIQALNQ---EQHQRAKINLLSKRKPPAER WWRWGGCMAWFGKCSKDSECCSN---SCDVT--RCELYPFPSRY-
OK213_E_167                                             ---------VAAVLMSIQALNQ---EQHQRAKINLLSKRKPPAER WWRWGGCMAWFGRCTKDSECCSN---SCDIT--RCELMRFPPDW-
OK005_J_148                                             MEKLAILLLVAAVLMSIQALNQ---EQHQRAKINLLSKRKPPAER WWRWGGCMAWFGKCSKDSECCSN---SCDIT--RCELMRFPPDW-
OK005_J_149                                             MEKLTILLLLAAVLMSTQALNQ---EQHQRAKINLLSKRKPPAER WWRWGGCMAWFGKCSKDSECCSN---SCDIT--RCELMRFPPDW-
OK213_E_168                                             MEKLTILLLVAALLLSIQAVNQ---EKHQRAKINLLSKRKPPAER WWRWGGCMAWFGRCTKDSECCSN---SCDIT--RCELMRFPPDW-
OK005_J_150                                             MEKLTILLLVAALLLSIQAVNQ---EKHQRAKINLLSKRKPPAER WWRWGGCMAWFGKCSKDSECCSN---SCDIT--RCELMRFPPDW-
CebrOK014_E_078                                         MEKLTILLLVALVLLSIQALNQ---EKHQRAKINLLSKRKPPAER WWRWGGCMAWFGLCSRDSECCSN---SCDVT--RCELMPFPPDW-
CebrOK016_E_086                                         MEKLTILLLVAAVLLSIQALNQ---EKHQRAKINLLSKRKPPAER WWRWGGCMAWFGLCSKDSECCSN---SCDVT--RCELMPFPPDW-
victoriaeG1AS73                                         MEKLTILLLVAAVLMSIQAVNQ---EKHQRAKMNLLSKRKPPAER WWRWGGCMAWFGLCSKDSECCSN---SCDVT--RCELMPFPPDW-
CebrOK033_J_122                                         MEKLTILLLVAAVLMSTQALNQ---EQHQRAKINLLSKRKPPAER WWRWGGCMAWFGLCSKDSECCSN---SCDVT--RCELMPFPPDW-
textileQ3YEG0                                           MQKLTILLLVAAVLMSTQALNQ---EQHQRAKINLLSKRKPPAER WWRWGGCMLWFGRCTKDSECCSN---SCDRT--YCELARFPSDW-

CebrOK016_E_087                                         MEKLAILHLVAAVLMSTQALNQ---EQHQRAKINLLSKRKPPAER WW---ECGIWFSRCTKDSECCSN---SCDVT--RCELMPFPPDW-
CebrOK016_E_088                                         MEKLTILLLVAAVLLSIQALNQ---EKHQRAKINLLSKRKPPAER WW---ECGIWFSRCTKDSECCSN---SCDVT--RCELMPFPPDW-
CebrOK033_J_123                                         ---------------------------------------KPPAER WW---ECGILFSHCTKDSECCSN---SCDQT--YCELMPFPPDW-
CebrOK035_J_171                                         ----------------PPALNQ---GQRQRTKINFLSKRKPPAER WW--GECTFWFGSCSTDSECCSN---SCDQT--LCELYPFPSRAI

CebrOK014_E_079                                         ----TILLLVAAVLMSTQALVERAGENRSKENIKFLLKRKRAADR GM-WGKCKDGLTTCLAPSECCSG---NCEQ---NCKMW-------
CebrOK016_E_089                                         ------LLLVAAVLMSTQALVERAGENRSKENIKFLLKRKRAADR GM-WGKCKDGLTTCLAPSECCSG---NCEQ---NCKM--------
OK005_J_151                                             ---------------------ERAGENRSKENIKFLLKRKRAADR GM-WGKCKDGLTKCLAPSECCSG---NCEQ---NCKMW-------
OK213_E_169                                             MEKLTILLLVAAVLMSTQALVERAGENRSKENIKFLLKRKRAADR GM-WGKCKDGLTKCLAPSECCSG---NCEQ---NCKMW-------
CebrOK033_J_124                                         MEKLTILLLVAAVLMSTQALVERAGENHSKENIKFLLKRKRAADR GM-WGKCKDGLTTCLAPSECCSG---NCEQ---NCKMW-------
CebrOK014_E_080                                         MEKLTILLLVALVLMSTQALVERAGENHSKENINFLLKRKRAADR GM-WGECKDGLTTCLAPSECCSE---DCEG---SCTMW-------
CebrOK016_E_090                                         MEKLTILLLVAAVLMSTQALVERAGENHSKENINFLLKRKRAADR GM-WGECKDGLTTCLAPSECCSE---DCEG---SCTMW-------
CebrOK033_J_125                                         MEKLTILLLVAAVLMSTQALVERAGENHSKENIKFLLKRKRAADR GM-WGECKDGLTTCLAPSECCSE---DCEG---SCTMW-------
OK213_E_170                                             MEKLTILLLVAAVLMSTQALVERAGENRSKENIKFLLKRKRAADR GM-WGDCKDGLTTCFAPSECCSE---DCEG---SCTMW-------
OK005_J_152                                             MQKLTILLLVAAILMSTQALVERAGENRSKENIKFLLKRKRAADR GM-WGDCKDGLTTCFAPSECCSE---DCEG---SCTMW-------
CebrOK035_J_172                                         MEKLTILLLVAVVLMSTQALPQGGGENRLKKNIKFLLKRKTAAAR GM-WGDCDDWLASCTTPSQCCTG---NCDG---MCRLWK------
CebrOK035_J_173                                         MEKLTILLLVAVLLMSTQALSQGGGENRAKENIKFLFKRKRAAAR GM-WGDCDDWLASCTTPSQCCTG---NCDG---MCRLWK------
CebrOK016_E_091                                         MEKLTILLLVAAVLMSTQALIQGGAKNRLKENMKLFSKRKAAAER GM-WGECKDWLTVCLSPTECCSE---NCEL---YCRAW-------
SRX1323887_E_116                                        --------------MSTQALIQGGAKNRLKENMKLFSKRKAAAER GM-WGECKDWLTVCLSPTECCSE---NCEL---YCRAW-------
OK213_E_171                                             MQKLTILLLVAAVLMSTQALIQGGAKNRLKENMKLFSKRKAAAER GM-WGECKDWLTVCLSPTECCSE---NCEL---YCRAW-------
OK193_E_139                                             MEKLAILLLVAAVLMSTQALIQGGAKNRLKENMKLFSKRKAAAER GM-WGECKDWLTVCLSPTECCSE---NCEL---YCRAW-------
OK213_E_172                                             MEKLAILLLVAAVLMSTQALIQGGAKNRLKENMKLFSKRKAAAER GM-WGECKDWLTVCLSPTECCSE---NCEL---YCRAW-------
OK193_E_140                                             MEKLTILLLVALVLMSTQALIQGGAKNRLKENMKLFSKRKAAAER GM-WGECKDWLTVCLSPTECCSE---NCEL---YCRAW-------
CebrOK035_J_174                                         MQKLTILLLLAAVLMSTQALIQGGAKNRLNENMKLFSKRKAAAER GI-WHDCKDWLAGCSSHMECCSE---NCET---FCRLW-------
OK214_J_150                                             MQKLTILLLLAAVLMSTQALIQGGAKNRLNENMKLFSKRKAAAER GI-WHDCKDWLAGCSSHMECCSE---NCET---FCRLW-------
OK212_J_167                                             MQKLTILLLLAAVLMSTQALIQGGAKNRLKENMKLFSKRKAAAER GI-WHDCKDWLAGCSSHMECCSE---NCET---FCRLW-------
OK006_E_144                                             MQKLTMLLLVAAVLMSTQALIQGGAKNRLKENMKLFSKRKAAAER GI-WHDCKDWLAGCSSHMECCSE---NCET---FCRLW-------
CebrOK033_J_126                                         MEKLAILLLVAAVLMSTQALIQGGAKNRLKENMKLFSKRKAAAER GI-WHDCKDWLAGCSSHMECCSE---NCET---FCRLW-------
OK005_J_153                                             -EKLAILLLVAAVLMSTQALIQGGAKNRLKENMKLFSKRKAAAER GI-WHDCKDWLAGCSSHMECCSE---NCET---FCRLW-------
OK006_E_145                                             MEKLAMLLLVAAVLMSTQALIQGGAKNRLKENMKLFSKRKAAAER GI-WHDCKDWLAGCSSHMECCSE---NCET---FCRLW-------
CebrOK035_J_175                                         MEKLAILLLVAAVLMSTQALIQGGAKNRLNENMKLFSKRKAAAER GI-WHDCKDWLAGCSSHMECCSE---NCET---FCRLW-------
geographusBAO65630                                      MEKLTILLLVAAVLMSTQAMIQGGGENRPMENIKYLSKSQRSAER GV-WSECSDWLAGCSSPSECCSE---KCDT---FCRLWR------
geographusBAO65629                                      MEKLTVLLLVAAVLMSTQATIQGGGENRPMENIKYLSKSQRSAER GV-WSECSDWLAGCSSPSECCSE---KCDT---FCRLWR------
CebrOK033_J_127                                         MEKLTILLLVAAVLMSTQALVERAGGNRLTENIKSLSRRKRSEES WL-WSDCYSWLGSCIAPSQCCSE---VCDY---FCRLWR------

CebrOK033_J_128                                         MEKLAILLLVAAVLMSTQALIQ---EERPKERIRFLSKRKTEAEI WW-EGECTDWLGSCLSPSECCYE---SCDG---YCTLW-------
CebrOK035_J_176                                         MEKLAILLLVAAVLMSTQALIQ---EKRPKERIRFLSKRKTEAEI WW-EGECTDWLGSCLSPSECCYE---SCDG---YCTLW-------
OK214_J_151                                             MEKLAILLLVAAVLMSTQALIQ---EKRPKERIRFLSKRKTEAEI WW-EGECTDWLGSCLSPSECCYE---SCDG---YCTLW-------
OK212_J_168                                             MEKLAILLLVAAVLMSTQALIQ---EKRPKERIRFLSKRKTEAEI WW-EGECTDWLGSCLSPSECCYE---SCDG---YCTLW-------
CebrOK016_E_092                                         MEKLTILLLVAAVLMSTQALIQ---EKRPKERIRFLSKRKTEAEI WW-EGECTDWLGSCLSPSDCCFE---HCET---FCRLW-------
SRX1323887_E_117                                        MEKLTILLLVAAVLMSTQALIQ---EKRPKERIRFLSKRKTEAEI WW-EGECTDWLGSCLSPSDCCFE---HCET---FCRLW-------
OK213_E_173                                             MQKLTILLLVAAVLMSTQALIQ---EKRPKERIRFLSKRKTEAEI WW-EGECTDWLGSCLSPSDCCFE---HCET---FCRLW-------
CebrOK035_J_177                                         MEKLAILLLVAAVLMSTQALIQ---EKRPKERIRFLSKRKTEAEI WW-EGECTDWLGSCLSPSDCCFE---HCET---FCRLW-------
OK213_E_174                                             MEKLAILLLVAAVLMSTQALIQ---EKRPKERIRFLSKRKTEAEI WW-EGECTDWLGSCLSPSDCCFE---HCET---FCRLW-------
OK193_E_141                                             MEKLAILLLVAAVLMSTQALIQ---EKRPKERIRFLSKRKTEAEI WW-EGECTDWLGSCLSPSDCCFE---HCET---FCRLW-------
OK214_J_152                                             MEKLAILLLVAAVLMSTQALIQ---EKRPKERIRFLSKRKTEAEI WW-EGECTDWLGSCLSPSDCCFE---HCET---FCRLW-------
OK212_J_169                                             MEKLAILLLVAAVLMSTQALIQ---EKRPKERIRFLSKRKTEAEI WW-EGECTDWLGSCLSPSDCCFE---HCET---FCRLW-------
SRX1323887_E_118                                        MEKLAILLLVAAVLMSTQALIQ---EKRPKERIRFLSKRKTEAEI WW-EGECTDWLGSCLSPSDCCFE---HCET---FCRLW-------
OK005_J_154                                             -EKLAILLLVAAVLMSTQALIQ---EKRPKERIRFLSKRKTEAEI WW-EGECTDWLGSCLSPSDCCFE---HCET---FCRLW-------
OK006_E_146                                             MEKLAMLLLVAAVLMSTQALIQ---EERPKKRIRFLSKRKTEAEI WW-EGECTDWLGSCLSPSDCCFE---HCET---FCRLW-------
litteratusABG01721                                      MEKLTILLLVAALLMSTQGLIQ---EKRQKAKITIFSKRKSNAER WW-EGDCTDWLGSCSSPSECCYD---NCET---YCTLWK------

CebrOK033_J_129                                         MQKLTILLLVAAVLMSIQALNQRGGVKRPREMIKYLSKRKTVAES WW-EGECSGWSVYCTMHTECCSG---ECIRH--YCDLW-------
OK212_J_170                                             --------------MSIQALNQRGGVKRPREMIKYLSKRKTVAES WW-EGECSGWSVYCTMHTECCSG---ECIRH--YCDLW-------
CebrOK035_J_178                                         MQKLTILLLVAAVLMSIQALNQRGGVKRPREMIKYLSKRKTVAES WW-EGECSGWSVYCTMHTECCSG---ECIRH--YCTLW-------

CebrOK035_J_179                                         ---------------SIQALNQRGGVKRPREMIKYLSKRKTVLES WW-EGECSGWSVYCTSHTECCSG---ECICY--YCDLW-------
OK212_J_171                                             MQKLTILLLVAAVLMSIQALNQRGGVKRPREMIKYLSKRKTVLES WW-EGECSGWSVYCTSHTECCSG---ECICY--YCDLW-------
OK214_J_153                                             ---------------SIQALNQRGGVKRPREMIKYLSKRKTVLES WW-EGECSGWSVYCTMHTECCSG---ECICY--YCDLW-------
OK214_J_154                                             --------------------------------IKYLSKRKTVAES WW-EGECSGWSVYCTMHTECCSG---ECICY--YCDLW-------
OK005_J_155                                             MQKLTILLLVAAVLMSIQAVNQGGGVKRPREMIKYLSKRKTVLES WW-EGECSGWSVYCTSHTECCSG---ECICY--YCDLW-------

OK213_E_175                                             MQKLTILLLVAAVLMSIQALNQRGGVKRPREMIKYLSKRKTALES WW-ENECSGWSVYCTKHSECCSD---ECIGY--YCDLW-------
OK193_E_142                                             MQKLTILLLVAAVLMSIQALNQRGGVKRPREMIKYLSKRKTALES WW-ENECSGWSVYCTKHSECCSD---ECIGY--YCDLW-------
OK006_E_147                                             MQKLTILLLVAAVLMSIQALNQRGGVKRPREMIKYLSKRRTALEC WW-EGECSGWSVYCTKHSECCSG---ECIGY--YCDLW-------
SRX1323887_E_119                                        MQKLTILLLVAAVLMSIQALNQRGGVKRPREMIKYLSKRRTALEC WW-EGECSGWSVYCTKHSECCSG---ECIGY--YCDLW-------
OK006_E_148                                             MQKLTILLLVAAVLMSIQALNQRGGVKRPREMIKYLSKRRTALEC WW-EGECSGWSVYCTKHSECCSG---ECGGN--YCELW-------
CebrOK035_J_180                                         MQKLTILLLVAAVLMSIQAVNQGGGVKSPREKINFLSKRKSTVES WW-EGECSGWSVYCTSDSQCCSG---ECGGN--YCELI-------
OK005_J_156                                             MQKLTILLLVAAVLMSIQAVNQGGGVKSPREKINFLSKRKSTVES WW-EGECSGWSVYCTSDSQCCSG---ECGGN--YCELI-------
CebrOK035_J_181                                         -------------------------------KINFLSKRKTTAES WW-EGECSGWSVYCTSDAECCSG---ECGNY--YCELF-------
OK005_J_157                                             MEKLAILLLVAAVLMSIQALNQGDGVKSPREKINFLSKRKTTAES WW-EGECSGWSVYCTSDAECCSG---ECGNY--YCELF-------
CebrOK014_E_081                                         MQKLTILLLVAAVLMSIQALNQGDGVKSPREKINFLSKRKTTAES WW-EGECSGWSVYCTSDAECCSG---ECGNH--YCELF-------
CebrOK033_J_130                                         MQKLTILLLVAAVLMSIQALNQGDGVKSPREKINFLSKRKTTAES WW-EGECSGWSVYCTSDAECCSG---ECGNH--YCELF-------
OK212_J_172                                             MQKLTILLLVAAVLMSIQALNQGDGVKSPREKINFLSKRKTTAES WW-EGECSGWSVYCTSDAECCSG---ECGNH--YCELF-------
OK214_J_155                                             MQKLTILLLVAAVLMSIQALNQGDGVKSPREKINFLSKRKTTAES WW-EGECSGWSVYCTSDAECCSG---ECGNH--YCELF-------
CebrOK016_E_093                                         MQKLTILLLVAAVLMSIQALNQGDGVKSPREKINFLSKRKTTAES WW-EGECSGWSVYCTSDAECCSG---E------------------
OK005_J_158                                             MQKLTILLLVAAVLMSIQALNQGDGVKSPREKINFLSKRKTTAES WW-EGECSGWSVYCTSDAECCSG---ECGNY--YCELF-------
OK006_E_149                                             MQKLTMLLLVAAVLMSIQALNQGDGVKSPREKINFLSKRKTTAES WW-EGECSGWSVYCTSDAECCSG---ECGNH--YCELF-------
OK213_E_176                                             MQKLTILLLVAAVLMSIQALNQGDGVKSPREKINFLSKRKTTAES WW-EGECSGWSVYCTSDSECCSG---ECGNH--YCELF-------
OK214_J_156                                             MEKLAILLLVAAVLMSIQALNQGDGVKSPREKINFLSKRKTTAES WW-EGECSGWSVYCTSDAECCSG---ECGNH--YCELF-------
OK006_E_150                                             MQKLTMLLLVAAVLMSIQALNQGDGVKSPREKINFLSKRKTTAES WW-EGECSGWSVYCTSDAECCSG---ECGGN--YCELW-------
OK006_E_151                                             MEKLAMLLLVAAVLMSIQALNQGDGVKSPREKINFLSKRKTTAES WW-EGECSGWSVYCTSDAECCSG---ECIGY--YCDLW-------
OK006_E_152                                             MQKLTMLLLVAAVLMSIQALNQGDGVKSPREKINFLSKRKTTAES WW-EGECSGWSVYCTSDAECCSG---ECIGY--YCDLW-------
OK214_J_157                                             MQKLKILLLVAAVLMSIQALNQGGGVKSPREKINFLSKRQTTAES WW-EGECSGWSVYCTSDADCCSG---ECGNY--YCELF-------
OK214_J_158                                             MQKLTMLLLVAAVLMSIQALNQGGGVKSPREKINFLSKRQTTAES WW-EGECSGWSVYCTSDADCCSG---ECGNY--YCELF-------
OK214_J_159                                             MQKLTMLLLVAAVLMSIQALNQGGGVKSPREKINFLSKRKSAAES WW-EGECSGWSVYCTSDSECCSG---ECGGN--YCELW-------
OK214_J_160                                             MQKLTILLLVAAVLMSIQALNQGGGVKSPREKINFLSKRKSAAES WW-EGECSGWSVYCTSDSECCSG---ECGGN--YCELW-------
OK214_J_161                                             MQKLTILLLVAAVLMSFQALNQGDGVKSPREKINFLSKRKTNAES WW-E-----------------------------------------
OK214_J_162                                             --KLTILLLVAAVLISIQALNQGGGVKSPREKINFLSKRKTTAES WW-EGECSGWSVYCTSDAEWCSG---ECGGN--YCELW-------
OK214_J_163                                             -------LIVAAVLMSIQALNQGDGVNSPREKINFLSKRKTTAVS WW-EGECSGWSVYCTSDAECCSG---ECGGN--YSELW-------
OK214_J_164                                             ----TILLLVAAVLMSIQALNQSDGVKSPREKINFLAKRKTTAES WW-EDECSGWSVYCMSDAECCSG---ECGN---------------
OK214_J_165                                             MQKLIILLLVAAVLMTLQALNQGDGVKSPKEKINFLSNRKTTAES WW-EGECS-------------------------------------
OK212_J_173                                             -----------------------------------LSKRKSTVES WW-ENECSGWSVYCTSDSQCCSG---ECGGN--YCELW-------
OK214_J_166                                             MQKLTILLLDTAVLMSIRALNQGVGVKSPREKINFLSKRKTTAES LW-EGECSGWSVYCTSDSECCSG---ECGGN--YCELW-------
OK214_J_167                                             MQKLTILLIVAAVLMSIQALIQGDGVKSPRENINFLSKRKSAAES WW-EGECNGWSVYCTSVSECCTG---ECGGN--Y-----------
OK214_J_168                                             MQKLTILLLVAAVMMSIQALNLGDGVKSPRGKINFVSKRKTTAES WW-E-----------------------------------------
OK005_J_159                                             MQKLTILLLVAAVLMSIQALNQGDGVKSPREKTNFLSKRKRTAES RW-EGEYSGWSVYCTSDAECCSG---ECGYH--YCELF-------
OK214_J_169                                             MQRLSMLLLVAAVLMSIQALNQGGEVKSPREKINFLSKRESAAES RW-EGEC--------------------------------------
OK213_E_177                                             MQKLTMLLLVAAVLMSIQALNQGGGVKSPREKINFLSKRKSAAES WW-EGECRTWNAPCRLDSECCSG---NCGKH--HCLAW-------
OK005_J_160                                             -------------------LNQGDRVKSPRDKINFLSIRKSTAES WW-EGECSGWSVYCTTEAECCSG---ECGNH--YCELF-------
OK214_J_170                                             --------------MSLQDLNQGGGVKSPREKINFLSKRKSSAES WW-EGECSGWSMYCTSDSECCSG---ECGNH--YGELF-------
OK214_J_171                                             --------LVAAVLMSIQALNQGEGVKSPREKLNFLSKRKTTAES WR-EGECSGWYVYCTSDAECCYG---ECGNY--YWELF-------
OK214_J_172                                             MQKLTILLLVDAVLMSIQALNQGDGVKCPREKINFSSKRKTTAAS WG-EGDCSGWSVY--------------------------------
CebrOK016_E_094                                         MEKLTILLLVAAILMLTQALIQ-DGEKHQRMKTHFLSKRKSVVES WW-EGECSGWSVYCVNDWECCSG---ECGNH--YCELF-------
SRX1323887_E_120                                        MEKLAILLLAAAILMLTQALIQ-DGEKHQRMKTHFLSKRKSVVES WW-EGECSGWSVYCVNDWECCSG---ECGGS--YCELW-------
SRX1323887_E_121                                        MEKLAILLLVAAILMLTQALIQ-DGEKHQRMKTHFLSKRKSVVES WW-EGECSGWSVYCVNDWECCSG---ECGGS--YCELW-------
OK212_J_174                                             ------------VLMSTQALIQGGAEKRQMAKIDF-SKRKSTAES WW-EGECRTWNAPCRLDSECCSG---NCGKH--HCLAW-------
CebrOK033_J_131                                         MEKLTILLLLAAVLMSTQALIQGGAEKRQMAKIDF-SKRKSTAES WW-EGECRTWNAPCRLDSECCSG---NCGKH--HCLAW-------
OK214_J_173                                             MEKLAILLLVAAVLMSTQALIQGGAEKRQMAKIDF-SKRKSTAES WW-EGECRTWNAPCRLDSECCSG---NCGKH--HCLAW-------
OK006_E_153                                             MQKLTILLLLAAVLMSTQALIQGGVEKRQMAKIDF-SKRKSTAES WW-EGECRTWNAPCRLDSE--------------------------
OK213_E_178                                             MQKLTILLLLAAVLMSTQALIQGGVEKRQMAKIDF-SKRKSTAES WW-EGECRTWNAPCRLDSECCSG---NCGKH--HCLAW-------
OK193_E_143                                             -EKLTILLLLAAVLMSTQALIQGGVEKRQMAKIDF-SKRKSTAES WW-EGECRTWNAPCRLDSECCSG---NCGKH--HC----------
CebrOK035_J_182                                         -------------------------------KIDF-FYIKSTAES WW-EGECRTWNAPCRLDSECCSG---NCGKH--HCLAW-------

OK193_E_144                                             -EKLTILLLLAAVLMSTQALVQSDGKKRPKHKIKFLSKRKTTAES WW-EGECRTWNAPCRLDSECCSG---NCGKH--HC----------
OK214_J_174                                             MQKLTNQLLVAAVLMLIQALNQGDGVKSPRGKFNFLSKRKSPAES WW-EG----------------------------------------
CebrOK016_E_095                                         MEKLTILLLVAAVLMSTQALIQDGGEKRTNEKIKFLSKRKSVAES WW-EGECRGWSNGCTQHSQCCSG---ECIGR--YCDIW-------
SRX1323887_E_122                                        MEKLTILLLVAAVLMSTQALIQDGGEKRTNEKIKFLSKRKSVAES WW-EGECRGWSNGCTQHSQCCSG---ECIGR--YCDIW-------
SRX1323887_E_123                                        MEKLAILLLVAAVLMSTQALIQDGGEKRTNEKIKFLSKRKSVAES WW-EGECRGWSNGCTQHSQCCSG---ECIGR--YCDIW-------
SRX1323887_E_124                                        MEKLAILLLVAAVLMSTPALIQGGVEKRQMAKIDF-SKRKSTAES WW-EGECRGWSNGCTQHSQCCSG---ECIGR--YCDIW-------
OK214_J_175                                             -EKLTILLLVAALLMSTQGLIQSGGENRPKEKIKFLSKRKSVAES WW-EGECLGWSNYCTSHSICCSG---ECILS--YCDIW-------
OK006_E_154                                             MEKLTILLLVAALLMSTQGLIQSGGENRPKEKIKFLSKRKSVAES WW-EGECLGWSNYCTSHSICCSG---ECILS--YCDIW-------
CebrOK035_J_183                                         MEKLTILLLVAVVLMSTQALIQSGGEKRPKEKIKFLSKRKTTAER WW-EGECRGWSNGCSRHSECCSD---NCKGI--YCALW-------
ventricosusQ9BPC7                                       MQKLTILLLVAAVLMSTQALIKGGGEKRPKEKIRFLSKRKTTAER WW-EGECRGWSNGCTTNSDCCSN---NCDGT--FCKLW-------
victoriaeG1AS80                                         MEKLTILLLVAAVLMSTQAMFQGGGEKRPKDKIKFLSKRKTNAES WW-EGECLGWSNGCTQPSDCCSN---NCKGR--NCDIW-------
ventricosusQ9BPC6                                       MQKLTILLLVAAVLMSTQALIKGGGEKRPKEKIKFLSKRRTNAER WW-EGDCTGWLDGCTSPAECCTA---VCDAT---CKLW-------
CebrOK014_E_082                                         MEKLTILLLVAVVLMSTQALPQGGGEKRPRENIRFLSKRKSNAER WR-EGSCTSWLATCTDASQCCTG---VCYKR-AYCALWE------
textileQ9BHB7                                           MEKLTILLLVAVVLMSTQALPQGGGEKRPRENIRFLSKRKSNAER WR-EGSCTSWLATCTDASQCCTG---VCYKR-AYCALWE------
CebrOK033_J_132                                         MEKLTILLLVAAVLMSTQALPQGGGEKRPRENIRFLSKRKSNAER WR-EGSCTSWLATCTDASQCCTG---VCYKR-AYCALWE------
CebrOK016_E_096                                         MAKLTILLLVAVVLMSTQALPQGGGEKRPRENIRFLSKRKSNAER WR-EGSCTSWLATCTDASQCCTG---VCYKR-AYCALWE------
OK005_J_161                                             MEKLTILLLVAAVLMSTQALPQGGGEKRPRENIRFLSKRKTNAER WR-EGSCTSWLATCTQDQQCCTD---VCYKR-DYCALWDDR----
OK006_E_155                                             -EKLTIQLLVAAVLMSTQALVQSGAEKRPWENIRFLSKRQASWEV WW-EGNCIEWLASCSTDEQCCSG---ACGD---YCTLW-------
OK193_E_145                                             MEKLTILLLVAAVLMSTQALIQSGAEKRPWENIRFLSKRQASWEV WW-EGNCIEWLASCSTDEQCCSG---ACGD---YCTLW-------
OK213_E_179                                             MEKLTILLLVAAVLMSTQALIQSGAEKRPWENIRFLSKRQASWEV WW-EGNCIEWLASCSTDEQCCSG---ACDA---YCTLW-------
imperialisA0A125S9F3                                    MEKLTILLLVTAVLMSTQALMQSGIEKRQRAKIKFFSKRKTTAER WW-EGECYDWLRQCSSPAQCCSG---NCGA---HCKAW-------
CebrOK035_J_184                                         MEKLTILLLAVTLLLSTQALIQGDGEERPLEKIKFLSKRQSLDEL WS-EGSCAGWSDSCQQNSECCSG---ECIGN--YCDWW-------
CebrOK035_J_185                                         MEKLTILLLAVTLLLSTQALIQGDGEERPLEKIKFLSKRQSLDEL WS-EGSCAGWSDSCQQHSECCSG---ECIGN--YCDWW-------
CebrOK035_J_186                                         MEKLTILLLAVTLLLSTQALIQGDGEERPLEKIKFLSKRQSLDEL WS-EGSCAAWSDSCQHNSECCSG---ECIGN--YCDWW-------
CebrOK035_J_187                                         MEKLTILLLAVTLLLSTQALIQGDGEERPLEKIKFLSKRQSVGEL WS-EGNCAGWSISCEQHSDCCSG---ECIGN--YCDWW-------
SRX1323887_E_125                                        --------------MSTQALIHGDGENRPKEKIKSLSKRKSVIQQ WW-DGDCTGWSNGCQWPSECCSG---ECIGY--YCDLW-------
CebrOK033_J_133                                         MQKLTILLLLAAVLMSTQALIQGGVEKSPKEKIRGFSEIWYTIWR WY-HGKCKGWSNGCVRHSECCSY---NCKRM--YCDI--------
CebrOK035_J_188                                         MQKLTILLLLAAVLMSTQALIQGGVEKSPKEKIRGFSEIWYTIWR WY-HGKCKGWSNGCVRHSECCSY---NCKRM--YCDI--------
OK005_J_162                                             MQKLTILLLLAAVLMSTQALIQGGVEKSPKEKIRGFSEIWYTIWR WY-HGKCKGWSNGCVRHSECCSY---NCKGM--YCDI--------
OK213_E_180                                             MQKLTILLLLAAVLMSTQALIQGGVEKSPKEKIRGFSEIWYTIWR WY-HGKCKGWSNGCVRHSECCSY---NCKGM--YCDI--------
OK214_J_176                                             MQKLTILLLLAAVLMSTQALIQGGVEKSPKEKIRGFSEIWYTIWR WY-HGKCKGWSNGCVRHSECCSY---NCKGM--YCDI--------
OK006_E_156                                             MQKLTILLLLAAVLMSTQALIQGGVEKSPKEKIRGFSEIWYTIWR WY-HGKCKGWSNGCVRHSECCSY---NCKGM--YCDI--------
OK212_J_175                                             MQKLTILLLLAAVLMSTQALIQGGVEKSPKEKIRGFSEIWYTIWR WY-HGKCKGWSNGCVRHSECCSY---NCKGM--YCDI--------
OK005_J_163                                             --------LVAAVLMSAQALIQGRGETR------LLSKRKSTFWR WW-DGECRLWSNGCRRNIECCSD---HCKGI--YCDIW-------

CebrOK035_J_189                                         ---------LVAVVMLTQALKQ-DGGVLKRMKNNFVTKRKSTAES WW-EGECLGWSNGCETDSDCCSG---SCDY---YCEIW-------
CebrOK035_J_190                                         MDKQAILLLLVAVLMLTQALNQ-DGEVLKRMKNNFVSKRKSTAES WW-EGECLGWSNGCESDSDCCSG---SCDY---YCEIW-------
CebrOK035_J_191                                         MDKQAILLLLVAVLMLTQALNQ-DGEVLKRMKNNFVSKRKSTAES WW-EGECLGWPNGCETGSDCCSG---S------------------
OK005_J_164                                             -------------LTSTQALIQGRGE-RQKAEINFLSKRKSTFWR WW-DGDCRTWNAPCNPGVECCFG---RCSHR--RCVFW-------

CebrOK035_J_192                                         MEKLTILLLVAAVLMSTQALYQ---EKRPKEMINFLSKGKTNAER R--KRQCEDVWMPCTSNWECCSL---DCER---YCTQIG------
OK005_J_165                                             --------------LSTQALNQ---EKRPKEMINFLSKGKTNAER R--KRQCEDVWMPCTSNWECCSL---DCEM---YCTQIG------
OK213_E_181                                             MQKLTILLLVAAVLLSTQALNQ---EKRPKEMINFLSKGKTNAER R--KRQCEDVWMPCTSNWECCSL---DCEM---YCTQIG------
OK193_E_146                                             MQKLTILLLVAAVLLSTQALNQ---EKRPKEMINFLSKGKTNAER R--KRQCEDVWMPCTSNWECCSL---DCEM---YCTQIG------
SRX1323887_E_126                                        MQKLTILLLVAAVLLSTQALNQ---EKRPKEMINFLSKGKTNAER R--KRQCEDVWMPCTSNWECCSL---DCEM---YCTQIG------
SRX1323887_E_127                                        MEKLAILLLVAAVLLSTQALNQ---EKRPKEMINFLSKGKTNAER R--KRQCEDVWMPCTSNWECCSL---DCEM---YCTQIG------
marmoreusQ3YEF4                                         MQKLTILLLVAAVLLSTQALNQ---EKRPKEMINVLSKGKTNAER R--KRQCEDVWMPCTSNWECCSL---DCEM---YCTQIG------
OK005_J_166                                             --------------LSTQALNQ---EKRPKEMINFLSKGKINAER R--KRGCKATWMSCSSGWECCSM---SCDM---YCG---------
OK193_E_147                                             ------------VLMSTQALYQ---EKRQKEMINFLSKGKINAER R--KRGCKATWMSCSSGWECCSM---SCDM---YCG---------
OK213_E_182                                             MEKLTILLLVAAVLMSTQALYQ---EKRQKEMINFLSKGKINAER R--KRGCKATWMSCSSGWECCSM---SCDM---YCG---------
magusQFQ61084                                           MQKLTILLLVAAVLMSTQALYQ---EKRQKEMINFLSKGKINAER R--KRGCKATWMSCSSAWECCSM---SCDM---YCG---------

CebrOK014_E_083                                         MQKLIILLLVALVLMSTQALFQ---EKRTMKKIDFLSKGKADAEK QR-KRNCSDDWQYCESPTDCCSW---DCDV---VCS--G------
CebrOK033_J_134                                         MQKLIILLLVAAVLMSTQALFQ---EKRTMKKIDFLSKGKADAEK QR-KRNCSDDWQYCESPTDCCSW---DCDV---VCS--G------
OK005_J_167                                             MQKLIILLLVAAVLMSTQALFQ---EKRTMKKIDFLSKGKADAEK QR-KRNCSDDWQYCESPSDCCSW---DCDV---VCS--G------
OK213_E_183                                             MEKLTILLLVAAVLMSTQALFQ---EKRTMKKIDFLSKGKADAEK QR-KRNCSDDWQYCESPSDCCSW---DCDV---VCS--G------
OK213_E_184                                             MQKLTILLLVAAVLMSTQALFQ---EKRTMKKIDFLSKGKADAEK QR-KRNCSDDWQYCESPSDCCSW---DCDV---VCS--G------
CebrOK016_E_097                                         MQKLIILLLVAAVLMSTQAVLQ---EKRPKEKIKLLSKRKTDAEK QQ-KRSCSDDWQYCESPTDCCSW---DCDV---VCS--G------
CebrOK033_J_135                                         MQKLIILLLVAAVLMSTQAVLQ---EKRPKEKIKLLSKRKTDAEK QQ-KRSCSDDWQYCESPTDCCSW---DCDV---VCS--G------
CebrOK014_E_084                                         MQKLIILLLVALVLMSTQAVLQ---EKRPKEKIKFLSKRKTDAEK QQ-KRLCPDYTEPCSHAHECCSW---NCYNG--HCT--G------
CebrOK016_E_098                                         MQKLIILLLVAAVLMSTQAVLQ---EKRPKEKIKLLSKRKTDAEK QQ-KRLCPDYTEPCSHAHECCSW---NCYNG--HCT--G------
CebrOK033_J_136                                         MQKLIILLLVAAVLMSTQAVLQ---EKRPKEKIKLLSKRKTDAEK QQ-KRLCPDYTEPCSHAHECCSW---NCYNG--HCT--G------
OK213_E_185                                             MEKLTILLLVAAVLMSTQAVLQ---EKRPKEKIKFLSKKKTDAEK QQ-KRLCPDYTEPCSHAHECCSW---NCHNG--HCT--G------
OK005_J_168                                             MQKLIILLLVAAVLMSTQAVLQ---EKRPKEKIKFLSKKKTDAEK QQ-KRLCPDYTEPCSHAHECCSW---NCHNG--HCT--G------

CebrOK014_E_085                                         MEKLTILLLVALVLTSTQALIQGSADERQKAKINFLSRS------ ---DRDCRGYDAPCSSGAPCCDW-W-TCSAQTNRCF---------
CebrOK016_E_099                                         MEKLTILLLVAAVLMSTQALIQGSADERQKAKINFLSRS------ ---DRDCRGYDAPCSSGAPCCDW-W-TCSAQTNRCF---------
CebrOK033_J_137                                         MEKLTILLLVAAVLTSTQALIQGGGDERQKAKINFLSRS------ ---DRDCRGYDAPCSSGAPCCDW-W-TCSAQTNRCF---------


[Superfamily O2-4 (Contryphan)]  
[Framework VI/VII]      
[                                                       /----Signal-----------/-------------Pro--------/ /-C------C-----CC----C----------C/------]
								    

OK193_E_148                                            MEKLTILLLVAAVLLSTQVLVQGDGETPDKAKINF-YASRMSLGNMRSR QSCSWPFDACTSDRQCCSG-HCI-----GHSYCKKMD---Y
magusDAC80592                                          MEKLTILLLVAAVLLSTQVLVQGDGETPHKAKINF-YASRLLSGNMRSR KNCGYAFDACTSDRQCCSG-YCV-----GNVYCK-------


OK193_E_149                                            MAKLTSLLLVAAVLLSTQVLVQGDGETPDKAKINF-YASRMLSGIMRP- -ACRLTGHPCNSGMECCS-----------------------
OK006_E_157                                            MEKMTILLLVAAVLLSTQVLVQGDEEKPQEPTTNL-FTARILSGNNQK- -SCNPKGHHCLYDWECCKN-ICI----AREYICG-------
OK006_E_158                                            MEKMTILLLVAAVLLSTQVLVQGDEEKPQEPTTNL-FTARMLSGNKRK- -RCRTNGERCISDSQCCSY-YCIIISVDDVSRCHLV-----
OK006_E_159                                            MEKMTILLLVAAVLLSTQVLVQGDEEKPQEPTTNL-FTARMLSGIKQK- -RCHTNGQWCIADAQCCSN-YCRHTSDYVVSRCRSLT----
OK006_E_160                                            MEKMTILLLVAAVLLSTQVLVQGDEEKPQEPTTNL-FTARMLSGNKRK- -RCHTNGERCISDAQCCSN-YCRHTSDYVVSRCRSLT----
OK006_E_161                                            MEKMTILLLVAAVLLSTQVLVQGDEEKPQEPTTNL-FTARMLSGNKKK- -RCIKIGQPCFHNEECCSD-DCV----APYNKCYWR-----
OK006_E_162                                            MEKMTILLLVAAVLLSTQVLVQGDEENPHKATTKL-FTGRMLSGNKQK- -RCRSRGQPCSYNTECCST-RCK----RHQHKCL-------
OK193_E_150                                            MEKLTILLLVAAVLLSTQVLVQGDEENPHKATTKL-FTGRMLSGNKQK- -RCRSRGQPCSYNTECCST-RCK----RHQHKCL-------
CebrOK014_E_086                                        MEKLTILLLVALVLLSTQVLVQGDEENPHKATTKL-FTGRMLSGNKQK- -RCRSRGQPCSYNTECCST-RCK----RHQHKCL-------
betulinusAMP44727                                      MEKLTILLLLAAVLMSTQVLVQGDREKPQKAPIDF-LTARMLSGNNEK- -RCLASGSWCEYSTQCCST-YCR----HRVHKCA-------
OK193_E_151                                            MAKLTSLLLVAAVLLSTQVLVQGDEENPQKALIDI-LTGRMVSGKKPK- -DCLPVGSLCHSSEQCCSG-WCP-----PQRVC--------
CebrOK035_J_193                                        -------LLVAAVLLSTQVLVQGDEENPQKALIDI-LTGRMVSGKKPK- -DCLPVGSLCHSSEQCCSG-WCP-----PQRAC--------
marmoreusAGG19147                                      MEKLTILRLVAAVLLSTQVLVQGDEENPQKALIDI-LTGRMVSGKKPK- -DCLPIGSLCHSSEQCCSG-WCS-----PKRVC--------

OK213_E_186                                            MEKLTILLLVAAVLLSTQVLVQGDEENPLKPMIYFILTGRAIPGNTPK- -SCDQTGEPCVLNEQCCYG-WCT-----NYGTCY-------
OK005_J_169                                            MEKLTILLLVAAVLLSTQVLVQGDEENPLKPMIYFILTGRAIPGNTPK- -SCDQTGEPCVLNEQCCYG-WCT-----NYGTCY-------
OK193_E_152                                            MEKLTILLLVAAVLLSTQVLVQGDEENPLKPMIYFILTGRAIPGNTPK- -SCDQTGEPCVLNEQCCYG-WCT-----NYGTCY-------

OK006_E_163                                            MEKMTILLLVAAVLLSTQVLVQGDEEIPQKAMIDS-IAGRMLSENYQK- -RCIKNGELCHSNWECCSD-NCSGPE-GHHPRCH-------
OK006_E_164                                            -------------LLSTQVLVQGDGEKPRKATTNF-FTTRMLLGNDQK- -RCLVSGKQCSNNAECCSS-ICV----QTRHRCSWQL---W

OK005_J_170                                            MEELTILLLVAAVLMSTQAMFQGDGEKSRKAEINF-SETRNLARNKQK- -RCKTYSKYCEADSECCTE-QCV------RSYCTLFG----
CebrOK014_E_087                                        MEKLTILLLVAAVLMSTQAMFQGDGEKSRKAEINF-SETRNLARNKQK- -RCKTYSKYCEADSECCTE-QCV------RSYCTLFG----
CebrOK016_E_100                                        MEKLTILLLVAAVLMSTQAMFQGDGEKSRKAEINF-SETRNLARNKQK- -RCKTYSKYCEADSECCTE-QCV------RSYCTLFG----
CebrOK033_J_138                                        MEKLTILLLVAAVLMSTQAMFQGDGEKSRKAEINF-SETRNLARNKQK- -RCKTYSKYCEADSECCTE-QCV------RSYCTLFG----
CebrOK035_J_194                                        MEKLTILLLVAAVLMLTQALFQGDDEKSQKAEINS-FETRKLARNKQV- -RCDGWSTYCEVDEECCSE-SCV------RSYCTLFG----
OK006_E_165                                            MEKMTILLLVAAVLL-TQVLVQCDGGNPQKSPIDF-FTGRMLSGNKQR- -GCVKSGKKCNSAKRCCRD-LCF----ALTLRCF-------
CebrOK035_J_195                                        M-RLTFLLLVAAVLMSTPALIQGGVENPQKAKINL-FTARKLFENRQK- -RCGGHMASCFSHVDCCWPFQCP------KAICT-------


[Superfamily O2-6 (Contryphan)] 
[Framework VI/VII] 

[                                                       /----Signal------/---Pro---/ /------------C------------------C------C-----CC---C----C----/]
									                    
SRX1323887_E_128                                        MKLTILLLVAALLVLTQARTERRRVKSR KTSSTYDDEMATFCWSYWNEFQYSYPYTYVQPCLTLGKACTTNSDCCSKYCNTKMCKINWEG
imperialisAME17676                                      MKLTILLLVAALLVLTQARTERRRVKSR KTSSTYDDEMATFCWSYWNEFQYSYPYTYVQPCLTLGKACTTNSDCCSKYCNTKMCKINWEG 


[Superfamily O2-10 (Contryphan)]  
[Framework XV]
[                                                       /---------Signal-------/-------Pro-------//C------C-----CC----C-C-----C-------C--/]

OK006_E_166                                             MMEKLAMLILGATVLLLIQAIVGGDRGNDEGGWRRFLDLEKR CKNNSEPCTDTSECCNDLECSCLQPAACSDQTRGKCRPR
OK193_E_153                                             MMEKLAMLILGATVLLLIQAIVGGDRGNDEGGWRRFLDLEKR CKNNSEPCTDTSECCNDLECSCLQPAACSDQTRGKCRPR
CebrOK014_E_088	                                        MMEKLVMLLLGATVLLLIQAIVGGDRGNDEDGWRRFLDLEKR CKNNSEPCTDTSECCNDLECSCLQPAACSDQTRGKCRPR
OK213_E_187	                                            MMEKLAMLLLGATVLLLIHAIVGGDRGNDEDGWRRFLDLEKR CKNNSEPCTDTSECCNDLECSCLQPAACSDQTRGKCR--
SRX1323887_E_129	                                    MMEKLAMLLLGATVLLLIHAIVGGDRGNDEDGWRRFLDLEKR CKNNSEPCTDTSECCNDLECSCLQPAACSDQTRAKCRPR
A_0055_078                                              MMKKLAMLLLGATVLLLVPVIGRGDGGDDEGPRSIVLDLEKR CKQNGETCESDSECCEGSRCTCLQPSACSDKLSGKCRTS
A_0039_135                                              MMKKLAMLLLGATVLLLVPVIGRGDGGDDEGPRSIVLDLEKR CKQNGETCESDSECCEGSRCTCLQPSACSDKLSGKCRTS

[Superfamily O2-11]
[Framework XV]
[                                                       /---------Signal-------/--------Pro----------//C------C-----CC--C-C-C-----C------C---------]
 
OK214_J_177                                             MEKLMILMVVAAMLVLTQVKVQGDQGNSPKDVRERLRDSFVQRVRR CLGHSQPCNEHSECCAPCFCGCTTGSVCN---KRCQA--------
OK212_J_176                                             MEKLMILMVVAAMLVLTQVKVQGDQGNSPKDVRERLRDSFVQRVRR CLGHSQPCNEHSECCAPCFCGCTTGSVCN---KRCQA--------
OK005_J_171                                             MEKLMILMVVAAMLVLTQVKVQGDQGNSPKDVRERLQDSFVQRVRR CLGHSQPCNEHSECCAPCFCGCTTGSVCN---KRCQA--------
CebrOK033_J_139	                                        MEKLMILMVVAAMLVLTQVKVQGDQGNSPKDVREGLQDSFVQRVRR CLGHSQPCNEHSECCAPCFCGCTTGSVCN---KRCQA--------
CebrOK035_J_196	                                        MEKLMILMVVAAMLVLTQVKVQGDQGNSPKDVRERLQDSFVQRVRR CLGHSQPCNEHSECCAPCFCGCTTGSVCN---KRCQA--------
SRX1323887_E_130	                                    MEKLMILMVVAAMLVLTQVKVQGDQDNAPKDVRKRLQDSIFQRVRR CKGSAQPCNNSSECCSQYTCKLAMQQSNL---SRCG---------
betulinusAMP44617                                       MEKLMTLMVVAAALVLTKVKVQGDQDNSPKDVRKRLQGSV---FKR CTEVSLPCEDDSECCAPYLCKCTMGSTCD---SRCRST-------


[Superfamily O2-WF (Contryphan)]  
[No Framework, short mature pep.] 
[                                                       /--------Signal----------/-------------------------------------------Pro------------------------------------------/ /C-----C]

CebrOK035_J_197                                         MMEKLTILILVAAVLLSTQVMVQGDR-----------------------------DQPADRDAVPRDDKPGGTSGKFMNVLRRSG------------------------------ CPWDPWCG
OK193_E_154                                             -------------------------R-----------------------------DQPADRDAVPRDDKPGGTSGKFMNVLRRSG------------------------------ CPFDPWCG
OK212_J_177                                             --------VLVAAVLLSTQVMVQGDR-----------------------------DQPADRDAVPRDDKPGGTSGKFMNVLRRSG------------------------------ CPFDPWCG
CebrOK035_J_198                                         MMEKLTILILVAAVLLSTQVMVQGDR-----------------------------DQPADRDAVPRDDNPGGTSGKLMNVLIRSG------------------------------ CPWQPWCG
OK214_J_178                                             -MGKLTILVLVAAVLLSTQVMVQGDA-----------------------------DQPADRDAVPRDDNPGGTSGKLMNVLIRSG------------------------------ CPWQPWCG
OK193_E_155                                             --------------------MVQGDA-----------------------------DQPADRDAVPRDDNPGGTSGKLMNVLIRSG------------------------------ CPWHPWCG
OK213_E_188                                             MMEKLIILILVAAVLLSTQVMVQGDA-----------------------------DQPADRDAVPRDDNPGGTSGKLMNVLIRSG------------------------------ CPWHPWCG
SRX1323887_E_131                                        MMEKLTILILVAAVLLSTQVMVQGDA-----------------------------DQPADRDAVPRDDNPGGTSGKLMNVLIRSG------------------------------ CPWHPWCG
ebraeusA0A1P8NVS9                                       -MGKLTILVLVAAVLLSTQVMVQGDA-----------------------------DQPADRDAVPRDDNPGGTSGKLMNVLIRSG------------------------------ CPWHPWCG
SRX1323887_E_132                                        -MGKLTILVLVAAVLLSTQVMVQGDA-----------------------------DQPADRDAVPRDDNPGGTSGKLMNVLIRSG------------------------------ CPWHPWCG
OK214_J_179                                             -MGKLTILVLVAAVLLSTQVMVQGDR-----------------------------DQPADRDAVPRDDNPGGTSGKLMNVLIRSG------------------------------ CPWQPWCG
stercusmuscarumP58787                                   -MGKLTILVLVAAVLLSTQVMVQGDA-----------------------------DQPADRDAVPRDDNPSGTDGKFMNVLRRFG------------------------------ CPWQPWCG
CebrOK035_J_199                                         -MEKLTILFLVAAVLLSTQ--VQGDG-----------------------------DQPADRDAVPRDDNPGGASGKFMNALRQRG------------------------------ CPWDPWCG
CebrOK033_J_140                                         -MEKLTILFLVVAVLLSTQVMVQGDG-----------------------------DQPADRDAVPRDDNPGGASGKFMNALRQRG------------------------------ CPWDPWCG
OK006_E_167                                             -MEKLTILFLVVAVLLSTQVMVQGDG-----------------------------DQPADRDAVPRDDNPGGASGKFMNALRQRG------------------------------ CPWDPWCG
OK005_J_172                                             -MEKLTILFLVVAVLLSTQIMVQGDG-----------------------------DQPADRDAVPRDDNPGGASGKFMNALRQRG------------------------------ CPWDPWCG
OK212_J_178                                             -MEKLTILFLVAAVLLSTQVMVQGDG-----------------------------DQPADRDAVPRDDNPGGASGKFMNALRQRG------------------------------ CPWDPWCG
OK214_J_180                                             -MEKLTILFLVAAVLLSTQVMVQGDR-----------------------------DQPADRDAVPRDDNPGGASGKFMNALRQRG------------------------------ CPWDPWCG
OK212_J_179                                             -MGKLTILVLVAAVLLSTQVMVQGDG-----------------------------DQPADRDAVPRDDNPGGASGKFMNALRQRG------------------------------ CPWDPWCG
CebrOK014_E_089                                         -MGKLTILVLVAVALLSTQVMVQGDG-----------------------------DQPADRDAVPRDDNPGGMSEKFLNALQRRG------------------------------ CPWQPYCG
textileQ9NDA7                                           -MGKLTILVLVAVALLSTQVMVQGDG-----------------------------DQPADRDAVPRDDNPGGMSEKFLNALQRRG------------------------------ CPWQPYCG
CebrOK016_E_101                                         MMEKLTILILVAAVLLSTQVMVQGDG-----------------------------DQPADRDAVPRDDNPGGMSEKFLNALQRRG------------------------------ CPWQPYCG
CebrOK033_J_141                                         MMEKLTILILVAAVLLSTQVMVQGDG-----------------------------DQPADRDAVPRDDNPGGMSEKFLNALQRRG------------------------------ CP------
OK213_E_189                                             -MGKLTILVLVAAALLSTQVMVQGDG-----------------------------DQPADRDAVPRDNIPGGTSEKFMNVLQRRG------------------------------ CPWKPWCG
magusQFQ61088                                           -MGKLTILVLVAAALLSTQVMVQGDG-----------------------------DQPADRDAVPRDNIPGGTSEKFMNVLQRRG------------------------------ CPWKPWCG
OK005_J_173                                             -MGKLTILFLVAAVLLSTQIMVQGDG-----------------------------DQPADRDAVPRDNIPGGTSEKFMNVLQRRG------------------------------ CPWKPWCG
lividusA0A1P8NVS2                                       -MEKLTMLVLVAAVLLSAQVMVQGDG-----------------------------DQPADRDAVPRDDNPGGTIGKIMNVLLPSG------------------------------ CPWNPWCG
OK006_E_168                                             ------------AILLSTQVTVQGDR-----------------------------DQPADRNAVPRDDNPDGMSGQFMNVLRRSG------------------------------ CPWEPWCG
SRX1323887_E_133                                        -MGKLTILVLVAAVLLSTQVMVQGDR-----------------------------DQPADRDAVPRDDKLGRPLGKFTNVLRRSG------------------------------ CPWEPWCG
lividusA0A1P8NVR4                                       -MEKLTMLVLVAAVLLSAQVMVQGDG-----------------------------DQPADRDAVPRDDNPGGTIGKFMYILH--G------------------------------ CPFQPWCG
OK006_E_169                                             -MGKLTILLLVAAALLSTQVMVQGGG-----------------------------DQPAARNAVPRDDNPDGM------------------------------------------ --------
OK006_E_170                                             ------------AILLSTQVTVQGDR-----------------------------DQPADRNAVPRDDNPGRATRKFMKVLQGRG----------------------------SE CPWKPWCG
OK193_E_156                                             ---------------LSTQVTVQGDR-----------------------------DQPADRNAVPRDDNPGRATRKFMKVLQGRG----------------------------SE CPWKPWCG
OK213_E_190                                             -MGKLTILVLVAAILLSTQVTVQGDR-----------------------------DQPADRNAVPRDDNPGRATRKFMKVLQGRG----------------------------SE CPWKPWCG
OK005_J_174                                             -MGKLTILFLVAAILLSTQVTVQGDR-----------------------------DQPADRNAVPRDDNPGRATRKFMKVLQGRG----------------------------SG CPWKPWCG
OK005_J_175                                             -MGKLTILFLVAAVLLSTQIMVQGDG-----------------------------DQPADRDAVPRDDNPGRATRKFMKVLQGRG------------------------------ --------
OK005_J_176                                             -MEKLTILFLVVAVLLSTQIMVQGDG-----------------------------DQPADRDAVPRDDNPGRATRKFMKVLQGRG----------------------------SG CPWKPWCG
CebrOK035_J_200                                         MMEKLTILILVAAVLLSTQVMVQGDR-----------------------------DQPADRDAVPRDDNPGGTSGKLMNVLPKKILQRNYDGHAGNTEIIETQPSDSNSTQAENE CPWHPWCG
CebrOK033_J_142                                         MMEKLTILILVAAVLLSTQVMVQGDA-----------------------------DQPADRDAVPRDDNPGGTSGKLMNVLPKKRLQRNYDGHAGNTEIMETQPSDSNSTQAENE CPWHPWCG
OK006_E_171                                             -MGKLTILVLVAAVLLSTQVMVQGDA-----------------------------DQPADRDAVPRDDNPGGTSGKLMNVLPKKILQRNYDGHAGNTEIMETQPSDSNSTQAENE CPWHPWCG
OK005_J_177                                             -MGKLTILFLVAAVLLSTQIMVQGDA-----------------------------DQPADRDAVPRDDNPGGTSGKLMNVLPKKILQRNYDGHAGNTEIMETQPSDSNSTQAENE CPWHPWCG
OK214_J_181                                             -MGKLTILVLVAAVLLSTQVMVQGDA-----------------------------DQPADRDAVPRDDNPGGTSGKLMNVLPKKRLQRNYDGHAGNTEIMETQPSDSNSTQAENE CPWHPWCG
OK212_J_180                                             -MGKLTILVLVAAVLLSTQVMVQGNA-----------------------------DQPADHDAVPRDDNPGGTSGKLMNVLPKKILQRNYDGHAGNTEIMETQPSDSNSTQAENE CPWHPWCG
OK213_E_191                                             -MGKLTILFLVAAALLSTQIMVQGDG-----------------------------DQPADRDAVPRDNKPGGTSGQFMTFLRQVR------------------------------ CRMTPLCR
OK214_J_182                                             -MEKMTILVLVSAVLLSTQVMVQGDR-----------------------------DQPADREAVPRDDKAGGTSGKFMNAVIRSR------------------------------ CPEGFWCR
OK213_E_192                                             -MEKLTILFLV-DVLLSTQVMVQGDGGSVGRSLKGPIQLPWGKSVVLRKDVQSGWDQPADRNAVPRDDNPGGAIGK--------------------------------------- -------S

[Superfamily O3-1]  
[Framework VI/VII]  
[                                                       /------Signal-------/------------Pro---------/ /----C---C------CC--------C---C-/]
										                
										                
OK213_E_193                                             ------MVLTLLLLVSMATSHQNGGEKQATQRDAFNFRRRRSLIRR EITEACEEHCELEDKDCCGLTDGQPRCAQMCLG
OK006_E_172                                             MSGLGIMVLTLLLLVSMATSHQDGGEKQATQRDAFNFRRRRSLIRR EITEACEEHCELEDKDCCGLTDGQPRCAQMCLG
SRX1323887_E_134                                        MSGLGIMVLTLLLLVSMATSHQDAGEKQATLRDAINVRLRRSLTRR TVDEPCNEHCENLDKNCCGRTNGQPRCARICLG
OK212_J_181                                             MSGLGIMVLTLLLLVSMATSHQDGGGKLAMQRDAINVGRRRSLTQR AVTEACEESCEVSGKTCCGITNGQPTCAPVCLG
OK214_J_183                                             MSGLGIMVLTLLLLVSMATSHQDGGGKLAMQRDAINVGRRRSLTQR AVTEACEESCEVSGKTCCGITNGQPTCAPVCLG
CebrOK016_E_102	                                        ------------------------------------------LTQR AVTEACEESCEVSGKTCCGTSNGQPTCAPVCLG
CebrOK033_J_143	                                        MSGLGIMVLTLLLLVSMATSHQDGGGKLAMQRDAINVGRRSLTQRA -VTEACEESCEVSGKTCCGTSNGQPTCAPVCLG
CebrOK035_J_201	                                        MSGLGIMVLTLLLLVSMATSHQDGGGKLAMQRDAINVGRRRSLTQR AVTEACEESCEVSGKTCCGITNGQPTCAPVCLG
CebrOK035_J_202	                                        MSGFGTMVLTLLLLVFMVTSHQDSGEKRATQRNGANVGWRRSIIRR AVDEECKEYCEQRNKNCCGETNGEPVCAQACLG
CebrOK035_J_203	                                        --------------------HQDSGEKRATRTNAINVGWRRSITRR -TTEECEEYCEQRNKDCCGLTNGEPRCASMCFG
CebrOK035_J_204	                                        ---------------FMVTSHQDSGEKQATRRNAINVGWRRSIIRR TRDEACKEYCEERNKNCCGRTNGEPRCASMCFG
CebrOK035_J_205	                                        MSGLGIMVLTLLLLVFMVTSHQDSGEKRATRRNAANVGWRRSIIRR TVDEACKEYCEERNKNCCGRTNGEPVCAQFCLG
OK213_E_194                                             ------MVLTLLLLVSMATSHQDGGGKLAMQRDAINVGRRRSLTQR AVTEACEESCEVSGKTCCGITNGQPTCAPVCLG
OK006_E_173                                             ------MVLTLLLLVSMATSHQDGGGKLAMQRDAINVGRRRSLTQR AVTEACEESCEVSGKTCCGITNGQPTCAPVCLG
OK005_J_178                                             -SGLGIMVLTLLLLVSMATSHQDGGGKLAMQRDAINVGRRRSLTQR AVTEACEESCEVSGKTCCGITNGQPTCAPVCLG
OK214_J_184	                                            ------------------TSHQDGGEKQATQRDAFNFRRRRSLIRR EITEACEEHCELEDKDCCGLTDGQPRCAQMCLG
betulinusAMP44738                                       MSGLGIMVLTLLLLVIMATSHQDAGEKQMTQRDAINVRRRRSITGR VVTEACEETCELEEKNCCGITNGQPFCFFPCFG
tessulatusQ9BP73                                        MSGLGIMVLTLLLLVFMATSHQDAGEKQATQRDAVNVRRRRSIAGR TTTEECDEYCEDLNKNCCGLSNGEPVCATACLG


[Superfamily O3-2]                                        
[Framework VI/VII]                                      
[                                                       /-------Signal------/--------Pro------//C-----C-----CC----------C-----C-------]
										                
										                
OK005_J_179                                             MSGLGIMVLTLLLLVSMATSHTDRGVGLLMPRDGLQER TCTSDDDCGDLL-CCPDTVGNPEGRCD--SDCTIY-----
OK212_J_182                                             MSGLGIMVLTLLLLVSMATSHTDRGVGLLMPRDGLQER TCTSDDDCGDLL-CCPDTVGNPEGRCD--SDCTIY-----
OK193_E_157                                             MSGLGIMVLTLLLLVSMATSHTDRGVGLLMPRDGLQER TCTSDDDCGDLQ-CCPDTVDKPEGRCD--SDCTIY-----
OK006_E_174                                             MSGLGIMVLTLLLLVSMATSHTDRGVGLLMPRDGLQER TCTSDDDCGDLQ-CCPDTVDKPEGRCD--SDCTIY-----
OK213_E_195                                             MSGLGIMVLTLLLLVSMATSHTDRGVGLLMQRDGLQER TCTSDDDCGDLQ-CCPDTVDKPEGRCD--SDCTIY-----
CebrOK033_J_144	                                        MSGLGIMVLTLLLLVSMATSHTDRGVGLLMPRDGLQER TCTSDDDCGGLL-CCPDTVGNPEGRCD--SDCTIY-----
CebrOK035_J_206	                                        MSGLGIMVLTLLLLVSMATSHTDRGVGLLMPRDGLQER TCTSDDDCGGLL-CCPDTVGNPEGRCD--SDCTIY-----
OK214_J_185	                                            -SGLGIMVLTLLLLVSMATSHTDRGVGLLMPRDGLQER TCTSDDDCGDLL-CCPDTVGNPEGRCD--SDCTIY-----
CebrOK016_E_103	                                        MSGLGIMVLTLLLLVSMATSHTDRGVGLLMPRDGLQER TCTSDDDCGDLQ-CCPDTVDKPEGRCD--SDCTIY-----
ermineusAXL95398                                        MSRLGIMVLTLLLLVFMATSRQDRGVKRLMLRNKLQKR TCSSPSNCPTGQECCPDRVDEPEGFCT--DECNIY-----
SRX1323887_E_135	                                    MSGLGIMVLTLLLLVSMATSHTDRGVGLLMPRDGLQER TCTSDDDCGDLQ-CCPDTVDKPEGRCD--SDCTIY-----
																						    
OK214_J_186                                             MSGLGIMVLTLLLLVFMATSHQDAGVKRLMLRNKLQKR TCSSPSDCPTGQECCPDKVDEPEGFCV--NECIITVYYTK
OK213_E_196                                             MSGLGIMVLTLLLLVFMATSHQDAGVKRLMLRNKLQKR TCSSPSDCPTGQECCPDKVDEPEGFCV--NECIITVYYTK
OK212_J_183                                             MSGLGIMVLTLLLLVFMATSHQDAGVKRLMLRNKLQKR TCSSPSDCPTGQECCPDKVDEPEGFCV--NECIITVYYTK
OK005_J_180                                             MSGLGIMVLTLLLLVFMATSHQDAGVKRLMLRNKLQKR TCSSPSDCPTGQECCPDKVDEPEGFCV--NECIITVYYTK
CebrOK033_J_145	                                        MSGLGIMVLTLLLLVFMATSHQDAGVKRLMLRNKLQKR TCSSPSDCPTGQECCPDKVDEPEGFCV--NECIITVYYTK
CebrOK035_J_207	                                        MSGLGIMVLTLLLLVFMATSHQDAGVKRLMLRNKLQKR TCSSPSDCPTGQECCPDKVDEPEGFCV--NECIITVYYTK
OK006_E_175	                                            --------------------------------NKLQKR TCSSPSDCPTGQECCPDKVDEPEGFCV--NECIITVYYTK
																						    
betulinusAMP44737                                       MSGLGIMVLTLLLLVFMATSHQDAGVKRLILRNKLQER TCSSPSDCPAGQECCPDKLDEPEGFCI--NDCIIT-----
eburneusADZ99332                                        MSGLGIMVLTLLLLVFMATSHQHRGGKQLMLRNNLQKR TCSSPSNCPTGQECCPDKVDEPEGFCA--DECIIT-----
distansAGE10529                                         MSGLGFMVLTFLLLVSMATSKQDGRVRRRMLHTRLVEG ACTSPSNCPTGQECCPDKLDEPEGSCA--NSCPFY-----
										                
OK214_J_187                                             ------MVLTLLLLVTMATGHEDNGVKWLMLQEKSDDG TCETDPECSTGETCCYESLHAQHGFCTKVGECIIL-----
CebrOK033_J_146	                                        MSGLGIMVLTLLLLVTLATGHEDNGVKWLMLQEKSDDG TCETDPECSTGETCCYESLHAQHGFCTKVGECIIL-----
OK193_E_158                                             MSGLGIMVLTLLLLVTMATSHEGNRVRRLMLQKKSDTG ICKTDPECSTGQVCCSDSLQASDGYCTEANNCISY-----
OK213_E_197                                             MSGLGIMVLTLLLLVTMATSHEGNRVRRLMLQKKSDTG ICKTDPECSTGQVCCSDSLQASDGYCTEANNCISY-----
OK193_E_159                                             MSGLGIMVLTLLLLVTMATGHEGNRVKWLMLQEKSDDG ICKTDPECSTGQVCCSDSLQASDGYCTEANNCISY-----										                 
OK006_E_176	                                            ----GIMVLTLLLLVTMATGHEGNRVRRLMLQKKSDTG ICKTDPECSTGQVCCSDSLQASDGYCTEANNCISY-----


[Superfamily O3-3]                         
[Framework XII]                                        
[                                                       /------Signal-------/-------------Pos----------/ /--C--C-----C--C-----CC---------C---C--/]
								                        
OK193_E_160                                             MSGLRVVLLALLLLVAMETSLQDAGRGKSM---RRHQSQANMYTLMRK MRSCQICATPPDCADCPHT-ICCIEPDNLEGECHTPCNSG
CebrOK014_E_090	                                        MSGLRVVLLALLLLVAMETSLQDAGRGKSM---RRHQSQANMYTLMRK MRSCQICATPPDCAGCPHT-ICCIEPDNLEGECHTPCNSG
CebrOK016_E_104	                                        MSGLRVVLLALLLLVAMETSLQDAGRGKSM---RRHQSQANMYTLMRK MRSCDICATPPDCAGCPHT-ICCIEPDNLEGECHTPCNSG
CebrOK033_J_147	                                        MSGLRVVLLALLLLVAMETSLQDAGRGKSM---RRHQSRANMYTLMRK MRSCGFCTYDSECAGCPHT-KCCIDSDTLDGEC---CN-G
CebrOK033_J_148	                                        MSGLRVVLLALLLLVAMETSLQDAGRGKSM---RRHQSRANMYTLMRK MRSCDICATPPDCAGCPHT-ICCIEPDNLEGECHTPCNSG
CebrOK035_J_208	                                        MSGLRVVLLALLLLVAMETSLQDAGRGKSM---RRHQSRANMYTLMRK MRSCGFCTYDSECAGCPHT-KCCIDSDTLDGEC---CN-G

leopardusAIC77101                                       M--------FTVFLLSLMTNLQGGGEGQRMHQDKHRQTARKLFTLGRK VKRNDPCELDSPYDDCTGTQICCTQPGSMSGECKE-ADEC


[Superfamily P-1a]     
[Framework IX] 
[                                                       /------Signal-------/-----------------Pro-----------------/ /----C---C-----C--------------C--C------C------]


OK193_E_161                                             MQLSLTRSALWMLLLLCALGNFVEVQPGQITRDVDNKQLTDNRRDLQSLMKPRTLLRSR GIPPRCGDGCVGGDDCSSQ-----------CPFCTH-DNLCY------
OK006_E_177                                             MQLSLTRSALWMLLLLCALGNFVEVQPGQITRDVDNKQLTDNRRDLQSLMKPRTLLRSR GIPPRCGDGCVGGDDCSSQ-----------CPFCTH-DNLCY------
OK213_E_198                                             MQLSLTRSALSMLLLLCALGNFVEVQPGQITRDVDNKQLTDNRRDLQSLMKPRTLLRSR GIPPRCGDGCVGGDDCSPQ-----------CPFCTH-DNLCY------
SRX1323887_E_136                                        MQLSLTRSALSMLLLLCALGNFVEVQPGQITRDVDNKQLTDNRRDLQSLMKPRTLLRSR GIPPRCGDGCVGGDDCSSQ-----------CPFCTH-DNLCY------
																												    
OK006_E_178                                             MHLSLAGSAVLMLLLLFAL----GVQSGQITRDADNGQLKANRRNLQSLWKKEG----- GTLVLCRSPCSAVRFCPPT-----------CSYCEGTPQICRRSSSTG
SRX1323887_E_137                                        MHLSLAGSAVLMLLLLFAL----GVQSGQITRDADNGQLKANRRNLQSLWKKES----- SSLVLCRSPCSAVRFCPPT-----------CSYCEGTPQICRRSSSTG
OK193_E_162                                             MHLSLAGSAVLMLLLLFAL----GVQSGQITRDADNGQLTANRRNLQSLWKKES----- RSGVYCRSPCSGVPVCPPT-----------CSYCEGTPKICRRSSSTG
OK213_E_199                                             MHLSLAGSAVLMLLLLFAL----GVQSGQITRDADNGQLKANRRNLQSLWKKES----- SSLVYCRSPCSGVPVCPPT-----------CSYCEGTPQICRRSSSTG
OK006_E_179                                             MHLSLAGSAVLMLLLLFAL----GVQSGQITRDADNGQLKANRRNLQSLWKKES----- SSLVYCRSPCSGVPVCPPT-----------CSYCEGSPKICRRTSSSG
																												    
OK214_J_188                                             MHLSLAGSAVLMLLLLFAL----GVQSGQITRDADNGQLTDNRRNLQSMRKPKTLFKSL YKRSGCGEPCSEDADCPPGP---------SCPYCTQNLSKCM------
OK212_J_184                                             MHLSLAGSAVLMLLLLFAL----GVQSGQITRDADNGQLTDNRRNLQSMRKPKTLFKSL YKRSGCGEPCSEDADCPPGP---------SCPYCTQNLSKCM------
OK006_E_180                                             MHLSLAGSAVLMLLLLFAL----GVQSGQITRDADNGQLTDNRRNLQSMRKPKTLFKSL YKRSGCGEPCSEDADCPPGP---------SCPYCTQNLSKCM------
CebrOK033_J_149                                         MHLSLAGSAVLMLLLLFAL----GVQSGQITRDADNGQLTDNRRNLQSMRKPKTLFKSL YKRSGCGEPCSEDADCPPGP---------SCPYCTQNLSKCM------
CebrOK035_J_209                                         MHLSLAGSAVLMLLLLFAL----GVQSGQITRDADNGQLTDNRRNLQSMRKPKTLFKSL YKRSGCGEPCSEDADCPPGP---------SCPYCTQNLSKCM------
CebrOK014_E_091                                         ------------------L----GVQSGQITRDADNGQLTDNRRNLQSMRKPKTLFKSL YKRSGCGEPCSEDADCPPGP---------SCPYCTQNLSKCM------
CebrOK033_J_150                                         MHLSLARSAVLMLLLLFAL----GVQSGQITRDADNGQLTDNRRNLQSMRKPKTLFKSL YKRSGCGEPCSEDADCPPGP---------SCPYCTQNLSKCM------
CebrOK035_J_210                                         MHLSLAGSAVLMLLLLFAL----GVQSGQITRDADNGQLTDNRRNLQSMRKPKTLFKSL YKRSGCGEPCSEDADCPPGP---------SCPYCTHNLSRCM------
OK213_E_200                                             -----------------------GVQSAQVTRDVDNGQLTDNRRNLQSMRKPKTLFKSL YKRSGCGEPCSEDADCPPGP---------SCPYCTQNLSKCM------
																												    
OK212_J_185                                             MHLSLAGSAVLMLLLLFAL----GVQSGQITRDADNGQLTANRRNLQSQWKSTTLFKSL YKRSGCGEPCLGDRDCPSG-----------CPFCTHGRSKCM------
OK005_J_181                                             MHLSLAGSAVLMLLLLFAL----GVQSGQITRDADNGQLTANRRNLQSQWKSTTLFKSL YKRSGCGEPCLGDRDCPSG-----------CPFCTHGRSKCM------
OK214_J_189                                             MHLSLAGSAVLMLLLLFAL----GVQSGQITRDADNGQLTANRRNLQSQWKSTTLFKSL YKRSGCGEPCLGDRDCPSG-----------CPFCTHGRSKCM------
CebrOK033_J_151                                         MHLSLAGSAVLMLLLLFAL----GVQSGQITRDADNGQLTANRRNLQSQWKSTTLFKSL YKRSGCGEPCLGDRDCPSG-----------CPFCTHGRSKCM------
CebrOK035_J_211                                         MHLSLAGSAVLMLLLLFAL----GVQSGQITRDADNGQLTANRRNLQSQWKSTTLFKSL YKRSGCGEPCSGDGDCPSG-----------CPFCTHGRSKCM------
OK212_J_186                                             MHLSLAGSAVLMLLLLFAL----GVQSGQITRYADNGQLTANRRNLQSQWKSTTLFKSL YKRSGCGEPCLGDKDCPSG-----------RPFFTHGRSKCM------
CebrOK035_J_212                                         MHLSLAGSAVLMLLLLFAL----GVQSGQITRDADNGQLTANRRNLQSLRKSKTLFKSL YKRSGCGEPCSGDGDCPSG-----------CPFCTHNLSRCM------
																												    
flavidusAFU50766                                        MHLSLAGSAVLMLLLLFALGNFVGVQTGQIARDVDNGLLTDKHRDLQSLRKPMDFFKSL YKRSSCGEDCWGDADCPND-----------CPYCVSNLSKCM------
betulinusAMP44742                                       MHLSLAGSAVLMLLLLFAFGTFVGVQSGQITRDVDNGQLTDDRRNLQSLWKQMTLFRSL YKRTNCGEACLKDEQCVGA-----------CQICVPSQLKCL------
SRX1323887_E_138                                        MHLSLARSAVLMLLLLFALGNFVGAQPGQITRDVDNGQLTDNGRNLQSRWKPMSLLKSL VKQRSCSGACTQNSDCGSG-----------C-GC--------------
CebrOK035_J_213                                         ---------VLMLLLLFALGNFVGVQPGQITRDVDNGQLTANHGNLQSRWKPMSLFKSL DKRASCGGGCALSTDCPST-----------CNTCLA--ALCE------
CebrOK014_E_092                                         MHLSLARSAVLMMLLLLALGNFVVVQSGQITRDVDNGQLTDNRRNLQSKWKPVSLYMS- --RRGCNNSCQEHSDCESH-----------C-ICTF--RGCGAVN--G
CebrOK016_E_105                                         MHLSLARSAVLMMLLLFALGNFVVVQSGQITRDVDNGQLTDNRRNLQSKWKPVSLYMS- --RRGCNNSCQEHSDCESH-----------C-ICTF--RGCGAVN--G
CebrOK035_J_214                                         MHLSLARSALLMLILLFALGNFVGVQSGQITRDVDNGQLPDDRRKLQSGGKPATLLGSP DKRSGCGVACDDDNDCSGE-----------CPHCTL-IQGCM------
praecellensATF27727                                     MHLSLAGSAVLMLLLLFAFGNFVGVQPGQITRDVDNGQLTDNRPNLRSLRKPMRLLKPL DKRHTCNGYCDTDHDCHENHVGHSEDDHHHC-YCTI-FGFCLHDSHID

[Superfamily P-1b]     
[framework IX] 

[                                                       /-------Signal------/---------Pro-------/ /-----C----C-----C--C-C----C---]
									                    

OK212_J_187                                             MTLTKSAVLILVLLLAFDNFADVQPGLMTMGGGRLSNLLSK RVSIWYCASRTCSAPADCNPCTCESGVCVDWL
magusQFQ61096                                           MTLTKSAVLILVLLLAFDNFADVQPGLITMGGGRLSNLLSK RVSIWYCASRTCSAPADCNPCTCESGVCVDWL
litteratusABC74995                                      MTLTKSAVLILVLLLAFDNFADVQPGLITMGGGRLSNLLSK RVSIWFCASRTCSAPADCNPCTCESGVCVDWL

[Superfamily P-2]     
[framework IX] 

[                                                       /-------Signal-------------/------Pro-----/ /-----C----C-----C---C-C----C-----------]

OK213_E_201                                             MTLSLARSAVLMLVLLLAFDSFVDVQPRGITRGARSRSGLLSK WYRNAGCSGDVCVSSADCST-CECQFRRCQIWTMDQGSPPS
OK193_E_163                                             MTLSLARSAVLMLVLLLAFDSFVDVQPRGITRGARSRSGLLSK WYRNAGCSGDVCVSSADCST-CECQFRRCQIWTMDQGSPPS
OK005_J_182                                             MTLSLARSAVLMLVLLLAFDSFVDVQPRGITRGARSRSGLLSK WYRNAGCSGDVCVSSADCST-CECQFRRCQIWTMDQGSPPS
SRX1323887_E_139	                                    MTLSLARSAVLMLVLLLAFDSFVDVQPRGITRGARSRSGLLSK WYRNAGCSGDVCVSSADCST-CECQFRRCQIWTMDQGSPPS
CebrOK016_E_106	                                        MTLSLARSAVLMLVLLLAFDSFVDVQPRGITRGARSRSGLLSK WYRNAGCSGDVCVSSADCST-CECQFRRCQIWTMDQGSPPS
CebrOK035_J_215	                                        MTLSLARSAVLMLVLLLAFDNFVDVQPRGITRGASSRSGLRSK WYRS--CSGA-CDSNSDCSSSCTCFLNKCKDW---------
betulinusAMP44741                                       MSLSLARSAVVMLVLLLAFDNFVDVQPRQTTRGANSFSDLLSK GYRLLPCSGNSCSGPSDCSR-CPCNFNTCMEVI--------
betulinusALM87483                                       MSLSLARSAVVMLVLLLAFDNFADVQPKQTTRGASSFSGLLSK GYRIVSCPGNPCEGPSDCSR-CSCKFNVCMEMM--------

[Superfamily Q-1a]   
[Framework  VI/VII] 
[                                                       /------Signal------/--------------Pro--------------/ /-C--C-----CC-----C-------------C--]

CebrOK033_J_152                                         MHTLEMMLLVLLLLPLATGDGDERAVGGDRNPNEARSANKRLLKRPARRMDR NDCTPC-GPTLCCRPGLRCGTSTRQGHYEEPACVSY
CebrOK035_J_216                                         MHTLEMMLLVLLLLPLATSDGDGRAVGGDRNPNEARSANKRLLKRPARRMDR NDCTPC-GPTLCCRPGLRCGTSTRQGHYEEPACVSY
OK214_J_190                                             MHTLEMMLLVLLLLPLATSDGDGRAVGGDRNPNEARSANKRLLKRPARRMDR NDCTPC-GPTLCCRPGLRCGTSTRQGHYEEPACVSY
OK212_J_188                                             MHTLEMMLLVLLLLPLATSDGDGRAVGGDRNPNEARSANKRLLKRPARRMDR NDCTPC-GPTLCCRPGLRCGTSTRQGHYEEPACVSY
OK005_J_183                                             MHTLEMMLLVLLLLPLATGDGDGRAVGGDRNPNEARSANKRLLKRPARRMDR NDCTPC-GPTLCCRPGLRCGTSTRQGHYEEPACVSY
CebrOK033_J_153                                         MHTLEMMLLVLLLLPLATGDGDERAVGGDRNPNEARSANKRLLKRPARRMDI NYCTPC-PPALCCQPGSKCG----------------
OK193_E_164                                             MHTLEMMLLVLLLLPLATGDGDGRAVGGDRNPNEARSANKRLLKRPARRMDI NYCTPC-PPALCCQPGSKCGISTHHDHNGEPACL--
OK213_E_202                                             MHTLEMMLLVLLLLPLATGDGDGRAVGGDRNPNEARSANKRLLKRPARRMDI NYCTPC-PPALCCQPGSKCGISTHHDHNGEPACL--
OK005_J_184                                             MHTLEMMLLVLLLLPLATGDGDGRAVGGDRNPNEARSANKRLLKRPARRMDI NYCTPC-PPALCCQPGSKCGISTHHDHNGEPACL--
SRX1323887_E_140                                        ---------VLLLLPLATGDGDGRAVGGDRNPNEARSANKRLLKRPARRMDI NYCTPC-PPALCCQPGSKCGISTHHDHNGEPACL--
CebrOK035_J_217                                         MHTLEMMLLVLLLLPLATSDGDGRAVGGDRNPNEARSANKRLLKRPARRMDR NYCTPC-PPALCCQPGSRCGTSTHQGHYGEPACV--
OK214_J_191                                             MHTLEMMLLVLLLLPLATSDGDGRAVGGDRNPNEARSANKRLLKRPARRMDR NYCTPC-PPALCCQPGSRCGTSTHQGHYGEPACV--
OK212_J_189                                             MHTLEMMLLVLLLLPLATSDGDGRAVGGDRNPNEARSANKRLLKRPARRMDR NYCTPC-PPALCCQPGSRCGTSTHQGHYGEPACV--
OK213_E_203                                             -----------------------------RNPNEARSATTRLLQGPARRMDT NDCTPC-APDLCCRPGLRCATSTRQGHYDEPACVSY
CebrOK014_E_093                                         MHTLEMMLLVLLLLPQGTGEGDGRAVGGDRNPNKARSATTRLLQGPARRMDG RNCTPC-GPGLCCIPGKSCETSTHHDTFGQPACV--
CebrOK016_E_107                                         MHTLEMMLLVLLLLPQGTGEGDGRAVGGDRNPNKARSATTRLLQGPARRMDG RDCTPC-GPGLCCISGKSCETSTHHDTFGQPACV--
OK006_E_181                                             MHTLEMMLLVLLLLPQGTGEGDGRAVGGDRNPNKARSATTRLLQGPARRMDG RECTPC-GPGLCCISGKSCETSTHHDTFGQPACV--
OK193_E_165                                             MHTLEMMLLVLLLLPLATGDGDGRAVGGDRNPNKARSATTRLLQGPARRMDG RDCTPC-GPGLCCISGKSCETSTHHDTFGQPACV--
OK213_E_204                                             MHTLEMMLLVLLLLPLATGDGDGRAVGGDRNPNKARSATTRLLQGPARRMDG RNCTPC-GPGLCCIPGKSCETSTHHGTFGQPACV--
SRX1323887_E_141                                        MHRLEMMLLVLLLLPLATGEGDGRAVGGDRNPNKARSATTRLLQGPARRMDG RNCTPC-GPGLCCIPGKSCETSTHHGTFGQPACV--
CebrOK035_J_218                                         MHTLEMMLLVLLLLPLATSDGDGRAVGGDRNPNEARSATTRLLQGPARRMDG SDCTPC-GPDLCCSPEKSCGKSTHHEHYGEPACV--
OK214_J_192                                             MHTLEMMLLVLLLLPLATSDGDGRAVGGDRNPNEARSATTRLLQGPARRMDG SDCTPC-GPDLCCSPEKSCGKSTHHEHYGEPACV--
SRX1323887_E_142                                        MHRLEMMLLVLLLLPLATGEGDGRAVGGDRNPNKARSATTRLLQGPARRRDG RDCTPC-SPDLCCNEGKECRPSTHQSHFNEPACV--
CebrOK033_J_154                                         MHTLEMMLLVLLLLPLATGDGDERAVGGDRNPNEARSATTRLLQGPARRTDG NDCTLC-DTNLCCRQGTTCGTSTNHKTYGEPACV--
OK212_J_190                                             -------------LPLATGDGDERAVGGDRNPNEARSATTRLLQGPARRTDG NDCTLC-DTNLCCRQGTTCGTSTNHKTYGEPACV--
OK005_J_185                                             MHTLEMMLLVLLLLPLATGDGDGRAVGGDRNPNEARSATTRLLQGPARRTDG NDCTLC-DTNLCCRQGTTCGTSTNHKTYGEPACV--
OK214_J_193                                             MHTLEMMLLVLLLLPLATSDGDGRAVGGDRNPNEARSATTRLLQGPARRTDG NDCTLC-DTNLCCRQGTTCGTSTNHKTYGEPACV--
CebrOK014_E_094                                         MHTLEMMLLVLLLLPQGTGEGDGRAVGGDRNPNKARSATTRLLQGPARRTDG NNCTSC-GPSLCCSPGLRCGTSTNHKAYDQPACLSY
OK193_E_166                                             ----------------------------------ARSATTRLLQGPARRTDG NNCTSC-GPSLCCSPGLRCGTSTNHKAYDQPACLSY
caracteristicusV5V9Y7                                   MHTLEMLLLVLLLVPLAPGEGDGQAVGGDRNPSEARRAYKRLLQRPARRMDR GGCTPC-GPNLCCSEEFRCGTSTHHQTYGEPACLSY
betulinusAMP44682                                       MHTLEMILLILLLLPLATGEGDGRAVGGDRSPSEAHRTYKRLLQRPARPVDR RECTPC-GPGLCCSPGETCGTSTHHDHYGEPACLSY

SRX1323887_E_143                                        MHTLEMLLLLLLLLPLAPGEGDGQAVAGDRNPSEARSTHEHLLQRLVRRIYG RDCQYCGGQNVCCRSGNN----VEYRRFT-------

[Superfamily Q-2]  
[Framework XIX]
[                                                       /--------Signal-------/-----------Pro-----------/ /C-----C----C-------CCC-----C---------C---C----C-]
										                
OK193_E_167                                             MSTLGMLLLIALLLPLINPADTEDGQAKPRSRKFRSLDFGSTSMRLDKR GCDPTDGCQTTVCNTEGG-PCCCQSGYNCQNTDKHGPACVLVCE-HNCPS
SRX1323887_E_144	                                    MSTLGMLLLIALLLPLINPADTEDGQAKPRSWKLRSLDFGRTSMRLDKR GCDPTDGCQTTVCNTEGG-PCCCQSGYNCQNTDRHGPACVLVCE-HNCPS
CebrOK014_E_095	                                        MSTLGMLLLIALLLPLINPADTEDGQAKPRSWKLRSLDFGRTSMRLDKR GCDPTDGCQTTVCNTEGG-PC-----------------------------
CebrOK035_J_219	                                        MSTLGMLLLIALLLPLTNPADTEDGQAKPRSRKLRSLDFERTSMRLDKR NCDPTDGCQTTVCETDTG-PCCCQHDYNCQDTDKFGPACVRVCPN-NCPP
K_0010_429                                              MSTLGMLLLIALLLPLANPADTGDGQAKPRTRNLRSLDFGHIPRQLDKR NCGSTENCSTPMCIPNGGVPCCCKPDEICEDSPRFGPVCSYSCD-HNCPK
distansP0C8W0                                           MSTLGILLPIALLLPLANPAENGDGQAMPRTRNLRSLSFGRTLRRLEKR GCDPTDGCQTTVCETDTG-PCCCKPNFTCQISNSGTKSCSCSGQPSDCPV


[Superfamily Q-3]  
[New Framework]
[                                                       /------Signal------/--------Pro-------/ /----C-----C-----CC--CC----C-C---------------C-C]

betulinusAMP44680                                       MMSALGMMLLL-LHLLPLVAFDGDGPTIRGRRNARFLKR MTTRTCNPETPCSSNKWCCDECCERSDCGCKWE---GGSTIKIYVCDC
OK213_E_205                                             -MSKLGMMLLILLLLLPLAAFDGDRPTIRGQRSAKFLKS VIKRSCVKETPCASNKWCCENCCSSSDCECDFV---GPNHMKSFVCVC
SRX1323887_E_145                                        -MSKLGMMLLILLLLLPLAAFDGDRPTIRGQRSAKFLKS VIKRSCVKETPCASNKWCCENCCSSSDCECDFV---GPNHMKSFVCVC
OK214_J_194                                             -MSTLGMMLLILLLLLPLAAFDGDGPTIRGHRSAGFLKS VIKRSCVKETPCASNKWCCENCCRRSDCGCGFV---GDYHLKRLVCVC
CebrOK033_J_155	                                        -MSKLGMMQLILLLLLPLAAFDGDGPTIRGHRSAGFLKS VIKRSCVKETPCASNKWCCENCCRRSDCGCGFV---GDYHLKRLVCVC
CebrOK016_E_108	                                        -MSKLGMMLLILLLLLPLAAFDGDRPTIRGQRSAKFLKS VIKRSCVKETPCASNKWCCENCC-------------------------
OK214_J_195                                             -MSKLGMMQLILLLLLPLAAFDGDGPTIRGHRSAGFLKS VIKRSCVKETPCASNKWCCENCCRRSDCGCGFV---GDYHLKRLVCVC
OK005_J_186                                             -MSTLGMMLLILLLLLPLAAFDGDGPTSRGHSSDELLNS MNRRECNQEQPCASQKWCCEYCCARSDCECKWV---GGLTIKDYECDC
OK212_J_191                                             -MSTLGMMLLILLLLLPLAAFDGDGPTNRGHSSDELLNS LNTRECNQEQPCASQKWCCEYCCARSDCECKWV---GGLTIKDYECDC
OK214_J_196                                             -MSTLGMMLLILLLLLPLAAFDGDGPTSRGHSSDELLNS LNTRECNQEQPCASQKWCCEYCCARSDCECKWV---GGLTIKDYECDC
CebrOK035_J_220	                                        -MSTLGMMLLILLLLLPLAAFDGDGPTNRGHSSDELLNS LNTRECNQEQPCASQKWCCEYCCARSDCECKWV---GGLTIKDYECDC
																							    
betulinusAMP44702                                       -MSALGTMLLI-LLLLPLAAFDGDGPTIRGHSSNKLWRS INRRECDQNRECESGKWCCDQCCARSNCECRSEDVGGGVNIRV--CDC
OK193_E_168                                             -MSTLGMMLLILLLLLPLAAFDGDGPTSRGHSSDELLNS MNRRECEQNRNCESGRWCCDDCCTRLDCGCKAKDIGGGVMVQV--CDC
SRX1323887_E_146                                        -MSTLGMMLLILLLLLPLAAFDGDGPTSRGHSSDELLNS MNRRECEQNRNCESGRWCCDDCCTRLDCGCKAKDIGGGVMVQV--CDC
OK213_E_206                                             -MSTLGMMLLILLLLLPLAAFDGDGPTSRGHSSDELLNS MNRRECEQNRNCESGRWCCDDCCTRQDCGCKAKDIGGGVMVQV--CDC
CebrOK014_E_096	                                        -MSTLGMMLLILLLLLPLAAFDGDGPTSRGHSSDELLNS MNRRECEQNRNCESGRWCCDDCCTRLDCGCKAKDIGGGVMVQV--CDC
CebrOK016_E_109	                                        -MSTLGMMLLILLLLLPLAAFDGDGPTSRGHSSDELLNS MNRRECEQNRNCESGRWCCDDCCTRLDCGCKAKDIGGGVMVQV--CDC
CebrOK035_J_221	                                        --------------------------TIRGHSSDELLNS MNTRECDQNRDCDSGTWCCDDCCTSSTCGCKEVDVGGGAMFRV--CDC


[Superfamily S-1a]  
[Framework VIII] 
[                                                       /-------Signal------/-----------Pro-----------/ /C---C------C---C-C-----C-C---------C-C-C--------]

OK005_J_187                                             -MSKMGAMFVLLLLFTLASSQQEGDIQARKTHLKSDFYRTLPRF-AR GCTISCGYEDNRCQGECHCPGKTNCYCT-SGHHNKGCGCAC---------
CebrOK033_J_156	                                        -MSKMGAMFVLLLLFTLASSQQEGDIQARKTHLKSDFYRTLPRF-AR GCTISCGYEDNRCQGECHCPGKTNCYCT-SGHHNKGCGCAC---------
CebrOK035_J_222	                                        MMSRMGAVFFLLMLFALASTHQEGDIEARKIGDWSYRSFFLSRAGGS -CT--CG-RTNQCNGSCACKGP-NCTCQRGAKRGTRCHCLCQD-------
CebrOK035_J_223                                         -----GAMLFVLFLLSPLASLQQEGDVREVKTDLKSNSYRPYRMSAR GCSGTCGQSDS-CTGTCNCEGHDSCSCS-SSGQQSGCTCSC---------
textileAGK23266                                         MMLKMGAMFVLLLLFTLASSQQEGDIQARKTHLKSGFYRTLPRF-AR GCTISCGYEDNRCQGECHCPGKTNCYCT-SGHHNKGCGCAC---------
textileB2CI27                                           --LKMGAMFVLLLLFTLASSHREGDIQARKTHLKSDFYRTLPRF-AR GCTISCGYEDNRCQGECHCPGKTNCYCT-SGHHNKGCGCAC---------

[Framework XXXIII]
[                                                       /-------Signal------/-----------Pro-----------/ /C---C------C---C-C-------C-C-------C-C-C-C-----C]
										                
OK193_E_169                                             MMSKMGAMFVLLLLLTLASSQQEGDVQARKTSLKSDFYRALSKYNKR RCVFDCG---TNCGGSCSCDDAPFDWCSCSGPTSKGCKCTCRCRNPTKC-
magusQFQ61102                                           MMSKMRAMFVLLLLFTLASSQQEGDVQARKTSLKSDFYRALRKYNKR ECVFDCG---TDCSGSCSCDNAPFDWCSCSGPTSKGCKCTCRCRNPTEC-
magusDAC80597                                           ------------------------DVQARKTSLKSDFYRALRKYNKR ECVFDCG---TDCSGSCSCDNAPFDWCSCSGPTSKGCKCTCRCKNPTEC-

										                
[Superfamily S-1b]                                        
[Framework VIII]                                        
[                                                       /--------Signal-------/--------Pro--------/ /----C---C------C---C-C-----C-C-----------C-C-C--]

OK005_J_188                                             MMSRMGAVFFLLMLFALASTHQEGDIEARKIGDWSYRSFFLSR A-GGSCT--CG-RTNQCNGSCACKG-PNCTCQ-RGAKR-GTRCHCLCQD-
OK214_J_197                                             MMSRMGAVFFLLMLFALASTHQEGDIEARKIGDWSYRSFFLSR A-GGSCT--CG-RTNQCNGSCACKG-PNCTCQ-RGAKR-GTRCHCLCQD-
ermineusAXL95737                                        MMSRMGVVFFLLLLFALASTQQEGDVEARKIDNWSYRHVLLSR R-GQQCT--CG-STDQCDGSCACRG-NNCRCK-RGVHRAASKCHCSCQN-
ermineusAXL95499                                        MMSRMGVVFFLLLLFALASTQQEGDVEARKIDNWSYRHVLLSR R-GQQCT--CG-STDQCDGSCACRG-NNCRCK-RGFHRAASKCHCSCQN-


										                
[Superfamily T-1]                                         
[Framework V]                                                                                                  
										                
[                                                       /-------Signal-----------------------/------------Pro-----------/ /---CC-----C--C--------]
										                
										                
CebrOK014_E_097                                         MHCLPVFVILLLLTASGPSVD---------------ARPKT-EDDVPLSSFRDHAKSTLRRLQDK QT--CCGY-RMCVPCG--------
CebrOK016_E_110                                         MHCLPIFVILLLLTASGPSVD---------------AQLKT-KDDVPLSSFRDHAKSTLRRLQDK QT--CCG-----------------
OK213_E_207                                             MRCLPVLIILLLLTASGPSVD---------------AGLKT-KDDVPLS---DNAKSTLRRLQYK QA--CCGF-KMCVPCG--------
CebrOK033_J_157                                         MHCLPIFVILLLLTASGPSVD---------------ARPKT-EDDVPLSSFRDNTKSTLQRLLKR VN--CCPIDESC--CS--------

OK214_J_198                                             MRCLPVFIILLLLIPSAPSVD---------------AQPMT-KDDVPLASLHDNAKRALQMFWNK RD--CCPAKMFC--CQW-------
OK214_J_199                                             MRCLPVFIILLLLIPSAPSVD---------------AQPMT-KDDVPLSSLHDNAKRALQMFWNK RD--CCPAKMFC--CQW-------
OK006_E_182                                             MRCLLVFIILLLLIPSAPSVD---------------AQPMT-KDDVPLSSLHDNAKRALQMFWNK RD--CCPAKMFC--CQW-------
OK214_J_200                                             MRCLPVFIILLLLIPSAPSVD---------------AQPMT-KDDVPLASLHDNAKRALQMFWNK RD--CCPAKLLC--CNP-------
OK006_E_183                                             MRCLPVFIILLLLIPSAPSVD---------------AQPMT-KDDVPLASLHDNAKRALQMFWNK RD--CCPAKLLC--CNP-------
magusQFQ61110                                           MRCLPVLIILLLLIPSAPSVD---------------AQPMT-KDDVPLASLHDNAKRALQMFWNK RD--CCPAKLLC--CNP-------
litteratusQ1A3R1                                        MRCLPVFIILLLLIPSAPSVD---------------AQPTT-KDDVPLASLHDNAKRALQMFWNK RD--CCPAKLLC--CNP-------

CebrOK033_J_158                                         MRCLPVFIILLVLIASAPSVD---------------SRPET-KDDASLASFHDNAKRTLQRFFNK RS--CCPENPAC--CH--------
OK214_J_201                                             MRCLPVFIILLVLIASAPSVD---------------SRPET-KDDASLASFHDNAKRTLQRFFNK RS--CCPENPAC--CH--------
OK005_J_189                                             MRCLPVFIILLVLIASAPSVD---------------SRPET-KDDASLASFHDNAKRTLQRFFNK RS--CCPENPAC--CH--------
CebrOK033_J_159                                         MRCLPVFVILLLLIASAPSVD---------------SRPET-KDDASLASFHDNAKRTLQRFFNK RS--CCPENPAC--CH--------

OK193_E_170                                             --------ILLLLIPSAPSVD---------------AQRKT-KDDVPLASFHDNAKRTLKRLWNK RS--CCPQEFLC--CLYLVK----
litteratusQ1A3R3                                        MRCLPVFIILLLLIPSAPSVD---------------AQRKT-KDDVPLASFHDNAKRTLKRLWNK RS--CCPQEFLC--CLYLVK----
leopardusQ6PN81                                         MRCVPVFIILLLLIPSAPSVD---------------AQRKT-KDDVPLASFHDNAKRTLKRLWNK RS--CCPQEFLC--CLYLVK----
OK212_J_192                                             MRCLPVFIILLVLIASAPSVD---------------SRPET-KDDASLASFHDNAKRTLKRLWNK RS--CCPQEFLC--CLYLVK----
							                            
OK005_J_190                                             MRCLPVFIILLLLIPSAPSAD---------------VQPKT-KDDVPLASYHDNAERTLQRLWNQ RH--CCPI----------------
betulinusAMP44630                                       MRCLPVFIILLVLIASAPTVD---------------ARPKI-EDDESLASFHDNVKQTLQRLLNK RD--CCPESPPC--CH--------
CebrOK035_J_224                                         MRCLPVFIILLVLIASAPSID---------------SRPEA-KDYTSLASFRDNAKRTLQRIFDK RE--CCPYHPVC--CWD-------
episcopatusBAS23499                                     MRCLPVFVILLLLIASAPSVD---------------ALPET-KDDMSLASFHDNAKRTLQIFSNK RY--CCVYDYSC--CLSWG-----
CebrOK035_J_225                                         MRCLPVFIILLLLIASTPSVN---------------ARPKT-KVDMPLASFHDDSMRTLQILSNK RY--CCLYNSQC--CGLG------
OK193_E_171                                             MRCLPVFVILLLLIASAPSAD---------------ARLKT-KDDMPLASSHAKVKRMLQILRNK R---CCITMELC--CEMETD----
OK005_J_191                                             MRCLPVFVILLLLIASAPSVD---------------ARLKT-KDDMPLASSHAKVKRMLQILRNK R---CCITFESC--YVFDLK----
CebrOK016_E_111                                         -------VILLLLIASAPSAD---------------ARLKT-KDDMPLPSSHANIKRTLQMLRNK R---CCPGWELC--CEWDDVW---
OK193_E_172                                             MRCLPVFVILLLLIASAPSAD---------------ARLKT-KDDMPLPSSHANIKRTLQMLRNK R---CCPGWELC--CEWDDVW---
OK193_E_173                                             MRCLPVFVILLLLIASAPSAD---------------ARLKT-KDDMPLPSSHANIKRTLQMLRNK R---CCPGWELC--CEWDEW----
OK193_E_174                                             MRCLPVFVILLLLIASAPSAD---------------ARLKT-KDDMPLPSSHANIKRTLQMLRNK R---CCPGWELC--CEWDDWW---
OK214_J_202                                             MRCLPVFVILLLLIASAPSAD---------------SRLKI-KDDMPLPSSHANIKRTLQIHRNK R---CCPGWELC--CEWDEW----
OK213_E_208                                             MRCLPVFVILLLLIASAPSVD---------------ARLKT-KDDMPLPSSHANIKRTLQIHRNK R---CCPGWELC--CEWDEW----
OK212_J_193                                             MRCLPVFVILLLLIASAPSVD---------------ARLKT-KDDMPLPSSHANIKRTLQIHRNK R---CCPGWELC--CEWDEW----
SRX1323887_E_147                                        MRCLPVFVILLLLIASAPSVD---------------ARLKT-KDDMPLPSSHANIKRTLQIHRNK R---CCPGWELC--CEWDEW----
marmoreusQ6PN86                                         MRCVPVFVILLLLIASAPSVD---------------ARLKT-KDDMPLPSSHANIKRTLQIHRNK R---CCPGWELC--CEWDEW----
magusQFQ61108                                           MRCLPVFVILLLLIASAPSAD---------------ARLKT-KDDMPLPSSHANIKRTLQIHRNK R---CCPGWELC--CEWDEW----
OK214_J_203                                             MRCLPVFVILLLLIASAPSAD---------------SRLKI-KDDMPLPSSHANIKRTLQIHRNK R---CCPGWELC--CEWDDGW---
OK006_E_184                                             MRCLPVFVILLLLIASAPSVD---------------ARLKT-K-DMPLPSSHANIKRTLQMLRNK R---CCPGWELC--CEWDDVW---
OK213_E_209                                             MRCLPVFVILLLLIASAPSVD---------------AQLKT-KDDVPLASFHANVKRTLQILLNK R---CCQIVPQC--CEWN------
OK005_J_192                                             MRCLPVFVILLLLIASAPSVD---------------AQLKT-KDDVPLASFHANVKRTLQKLLNK R---CCQIVPQC--CEWN------
OK193_E_175                                             MRCLPVFVILLLLVASVPSVD---------------ALLKT-KDDVPLASSHANVKRTLQILRDK RF--CCRTQEVC--CEVIKNG---
OK193_E_176                                             MRCLPVFVILLLLIASAPTVD---------------AQLKT-KDDMPLASFHANVKRTLQILRDK RF--CCRTQEVC--CEVIKNG---
SRX1323887_E_148                                        MRCLPVFVILLLLIASAPSVD---------------ARLKT-KDDMPLASFHANVKRTLQILRDK RF--CCRTQEVC--CEAIKNG---
CebrOK014_E_098                                         MRCLPVFVILLLLIASTPSID---------------ARPKT-KDDMPLASFNDNAKRILQILSRK PC--CSIHDSSC--CGLG------
CebrOK016_E_112                                         MRCLPVFVILLLLIASTPSID---------------ARPKT-KDDMPLASFNDNAKRILQILSRK PC--CSIHDSSC--CGLG------
CebrOK016_E_113                                         MRCLPVFVILLLLIASAPSVD---------------ARPKT-KDDMPLASFNDNAKRILQILSRK PC--CSIHDSSC--CGLG------
CebrOK033_J_160                                         MRCLPVFVILLLLIASTPSVD---------------AQLKT-KDDMPLASFNDNAKRILHILLRK PC--CGAHDSSC--CGIGK-----
OK005_J_193                                             MRCLPVFVILLLLIASTPSVD---------------ARAKT-RDDMSLASFHDDAKRILQILQDR SG--CCVIDRNC--CG--------
OK193_E_177                                             MRCLPVFVILLLLIASAPSVD---------------ARPKT-KDDMPLASFHDNAKRILQILQDR NA--CCIV-RQC--C---------
OK005_J_194                                             MRCLPVFVILLLLIASAPSVD---------------ARPKT-KDDMPLASFHDNAKRILQILQDR NA--CCIV-RQC--C---------
marmoreusP69764                                         MRCLPVFVILLLLIASAPSVD---------------ARPKT-KDDMPLASFHDNAKRILQILQDR NA--CCIV-RQC--C---------
SRX1323887_E_149                                        MRCVPVFIILLLLSPSAPSVD---------------ARPKT-KDDMPLASFHDNAKRILQILQDR NA--CCIV-RQC--C---------
OK193_E_178                                             MRCLPVFVILLLLIASAPSVDARPKTKDDMPLASFHARPKT-KDDMPLASFHDNAKRILQILQDR NA--CCIV-RQC--C---------
marmoreusBAO02114                                       MRCLPVFVILLLLIASAPSVDARPKTKDDMPLASFHARPKT-KDDMPLASFHDNAKRILQILQDR NA--CCIV-RQC--C---------
episcopatusBAS24427                                     MRCLPVFVILLLLIASTPNVD---------------ARPKT-KDDMPLASFHDDAKRILQILQDR NG--CCIA-REC--CG--------

CebrOK014_E_099                                         MRCLPVFVILLLLIASTPSID---------------ARPKT-KDDMPQASFHGNARRTLQMLSKK QC--CWYFDISC--CITV------
CebrOK016_E_114                                         MRCLPVFVILLLLIASMPSDA---------------VQLKT-KDDMPQASFHGNARRTLQMLSKK QC--CWYFDISC--CITV------
CebrOK033_J_161                                         MRCLPVFVILLLLIASTPSDA---------------VPLKT-KDDMPQASFHGNARRTLQMLSKK QC--CWYFDISC--CITV------
CebrOK033_J_162                                         MRCLPVFVILLLLIASMPSDA---------------VQLKT-KDDMPLPSFNGNARRTPRMLSNK RI--CCYPNVWC--CD--------
CebrOK014_E_100                                         MRCLPVFVILLLLIASTPSID---------------ARPKT-KDDMPLPSFNGNARRTPRMLSNK RI--CCYPNVWC--CD--------
CebrOK016_E_115                                         MRCLPVFVILLLLIASTPSID---------------ARPKT-KDDMPLPSFNGNARRTPRMLSNK RI--CCYPNVWC--CD--------

OK213_E_210                                             MRCLPVFVILLLLIASAPSVD---------------ARPKT-KDGMPLASFHDNATRNLQIL--- ----CCKHTLSC--CTGK------
ebraeusAGK23260                                         MRCFPVFVTLLLLIASAPSVD---------------ARPKT-KDGMPLASFHDNATRNLQIL--- ----CCKHSLEC--CTGK------
SRX1323887_E_150                                        MRCVPVFIILLLLSPSAPSVD---------------AHPKT-KDDVPLASVHDSALRILSR---- -Q--CCITIPEC--CRIG------
SRX1323887_E_151                                        MRCVPVFIILLLLIPSASSAA---------------VQPKTEKDDVPLASVHDSALRILSR---- -Q--CCITIPEC--CRIG------

SRX1323887_E_152                                        MRCVPVFIILLLLSPSAPSVD---------------AHPKT-KDDVPLASFHDDAKRTLQRLWIK AL--CCYGYAFC--CRLGR-----
OK213_E_211                                             MCCIPVFIILLLLIPSAPSIL---------------AQPTT-KGDVALASSYDDAKRTLQRLSIK YS--CC------------------
SRX1323887_E_153                                        MCCIPVFFILLLLIPSAPSIL---------------AQPTT-KGDVALASSYDDAKRTLQRLSIE YS--CCPRIVGC--CVIP------
OK193_E_179                                             MRWRPFFSILLLLIPSAPSIL---------------AQPTT-KGDVALASSYDDAKRTLQRLSIK YS--CCPGIVSC--CVIP------
CebrOK014_E_101                                         MRCLPVFVILLLLIASAPSVD---------------AQPKT-KDDVPLAPLHDNIQSTLQTLRKK V---CCRPMQDC--CSGK------
CebrOK016_E_116                                         MRCLPVFVILLLLIASAPSVD---------------AQPKT-KDDVPLVPLHDNIKSTLQTLRKK V---CCRPMQDC--CSGK------
CebrOK033_J_163                                         MRCLPVFVILLLLIASAPSVD---------------AQPKT-KDDVPLVPLHDNIKSTLQTLRKK F---CCRPVTPC--CAGK------
CebrOK033_J_164                                         MRCLPVFVILLLLIASTPSVD---------------AQLKT-KDDMPQASFHDNAERDQQK--KT SD--CCFYHNCC--C---------
OK213_E_212                                             --CLPVFVILLLLIASTPSVD---------------AQLKT-KDDMPQASFHDNAKRDLQRLLRT SD--CCFYHNCC--C---------
OK005_J_195                                             MRCLPVFVILLLLTASGPSVD---------------AGLKT-KDDVPLAPLHDNAKSALQHLNQR ----CCQTFYWC--CVQGK-----
CebrOK035_J_226                                         MRCLPVFVILLLLLASTPSVD---------------ALLKT-KHDMPLASSYDNEKRTLQTLLNK RL--CCPF-LEC--CEGWW-----
OK006_E_185                                             MRCLPVLIILLLLTASAPGVD---------------VLPKT-EDDVPLSSVYGNGKSILRGILRK GI--CCGV-SF-------------
OK193_E_180                                             MRCLPVLIILLLLTASAPGVD---------------VLPKT-EDDVPLSSVYGNGKSILRGILRK GI--CCGV-SFCYPC---------
SRX1323887_E_154                                        MRCLPVLIILLLLTASAPGVD---------------VLPKT-EDDVPLSSVYGNGKSILRGILRK GI--CCGV-SFCYPC---------
OK213_E_213                                             MRCLPVLIILLLLTASAPGVD---------------VLPKT-EDDMPLSSVYGNGKSILRGILRK GI--CCGV-SFCYPC---------
OK005_J_196                                             MRCLPVLIILLLLTASAPGVD---------------VLPKT-EDDMPLSSVYGNGKSILRGILRK GI--CCGV-SFCYPC---------
magusQFQ61105                                           ---LPVFVILLLLTASAPGVD---------------VLPKT-EDDVPLSSVYGNGKSILRGILRK GI--CCGV-SFCYPC---------
OK214_J_204                                             --------------------------------------PKT-EDDVPLSSVYGNGKRNLRGILRK GI--CCGV-SFCYPC---------
OK213_E_214                                             MRCLPVLIILLLLTASAPGVD---------------VLPKT-EDDMPLSSVYGNGKSILRGILRK DV--CCGF-RMCHPC---------
OK212_J_194                                             MRCLPVLIILLLLTASAPGVY---------------VLPKT-EDDVPLSSVYGNGKSILRGILRK DV--CCGF-RMCHPC---------
magusQFQ61112                                           MRCLPVLIILLLLTASAPGVY---------------VLPKT-EDDVPLSSVYGNGKSILRGILRK DV--CCGF-RMCHPC---------
OK214_J_205                                             MRCLPVLIILLLLTASAPGVV---------------VLPKT-EDDVPLSSVYGNGKSILRGILRK DV--CCGF-RMCHPC---------
SRX1323887_E_155                                        MRCLPVLIILLLLTASAPGVD---------------VLPKT-EDDVPLSSVYGNGKSILRGILRN GV--CCGY-KLCHPC---------
OK005_J_197                                             MRCLPVLIILLLLTASAPGVD-------------------------------GNGKSILRGILRK GI--CCGV-SFCYPC---------

OK005_J_198                                             MRCLPVFIILLVLIASAPSID---------------FRSEA-KDDTSQASFHGNVRRTLLRFYNK RGCCCCVYHPVC--CWG-------
OK212_J_195                                             MRCLPVFIILLVLIASAPSID---------------FRSEA-KDDTSQASFHGNVRRTLLRFYNK RGCCCCVYHPVC--CWG-------

CebrOK035_J_227                                         MRCLPVFVILLLLIASAPSAD---------------ALQKT-NHDVPLASHLDNAKSTLQTHWNK R---CCPGRPWC--CYG-------
OK005_J_199                                             MRCLLVFVILLQLTASAPGVD---------------GRPKT-EDDVSLSSVSDNAKITLQTLWDK R---CCPPEIWC--CGFQHER--K
CebrOK035_J_228                                         MRSLPLLIILLLLLPSAPSAD---------------VQPKT-KDDVPLASFLDNAKGTLQR---- -G--CCPDIAMC--CVGIGK----
OK212_J_196                                             MCSLPVFIILLLLIPSAPSAD---------------VQPKT-KDDVPLASFLDNAKGTRQI---- -S--CCPDMPLC--CVGIGK----
CebrOK035_J_229                                         MRCLPIFIILLVLIPSAASL----------------ARPKT-NDDVAMASFYDNAKRILQKHWAK PS--CCPEHTWC--C---------
CebrOK014_E_102                                         MRCFPVFIILLLLIASAPCFD---------------ARTKT-DDDVPLSSLRDNLKRTIRTRLNI RE--CCED-GWC--CTAAPLTG-R
CebrOK016_E_117                                         MRCFPVFIILLLLIASAPCFD---------------ARTKT-DDDVPLSSLRDNLKRTIRTRLNI RE--CCED-GWC--CTAAPLTG-R
CebrOK033_J_165                                         MRCFPVFIILLLLIASAPCFD---------------ARTKT-DDDVPLSSLRDNLKRTIRTRLNI RE--CCED-GWC--CTAAPLTG-R
OK005_J_200                                             ---------LMLLIASAPCFD---------------ARTKT-DDDVPLSSLRDNQKRTIRTRLNI RE--CCSD-GWC--CTAAPLTG-R
OK213_E_215                                             -----VFIILLLLIASAPSFD---------------ARTKT-DDDVPLSSLRDNQKRTIRTRLNI RE--CCSD-GWC--CTAAPLTG-R
CebrOK035_J_230                                         MRCLPVFIILLLLIPSAPSVD---------------AQTKT-KNFLTLASLRDFAKKSPKRLTQQ RE--CC------------------
CebrOK035_J_231                                         MRCLPAFILLLLVVSSAPGVD---------------VRSKT-KNIVTLASLRDFAKKTLKRISPL AV--CCPRRFPC--CDIREKET-K
CebrOK035_J_232                                         MRCLPAFILLLLVVSSAPGVD---------------VRSKT-KNIVTLASLRDFAKKTLKRLSTQ PE--CCPRNFIC--CEVG------
SRX1323887_E_156                                        MRCLPAFIILLLVVSSAPGVD---------------VRSKT-KNIVTLASLRDFAKKTLKRLSTQ PE--CCPRNFIC--CEVG------
CebrOK035_J_233                                         MRCLPVFVILLLLIASVPSVD---------------A----------------NIKRILQIHRNK R---CCISFEEC--CHWEEELEGK
OK005_J_201                                             MRCLPVFVILLLLIASAPSVD---------------ARMKP-K-DMPLASSQANVKGIHHILQIK NM--CCGFKPYC--CNW-------
OK213_E_216                                             MRCLPVFVILLLLIASAPSVD---------------ARMKP-K-DMPLASSQANVKGIHHILQIK NM--CCGFKPYC--CNW-------
CebrOK035_J_234                                         MRCLPVFIILLLLVPSAHSIV---------------AQSRT-NYGVPQASFHGNAKAAQSRRTVL FP--CCPEYEWC--CTWMDW----
CebrOK014_E_103                                         ----------------APSVD---------------ARRKT-KGNMPLAPFHENAKRTLHILLNK RD--CCLISPWC--CEVDEEFGYK
OK005_J_202                                             MRCLPVLIILLLLTASAPSVD---------------ALLKT-KGGVLRSSFRGNPERTRQKLSNN IR-------AWCHPCPFEYG---Q

[Superfamily T-2]  
[Framework V]  
[                                                       /------Signal------/----------------Pro---------/ /---CC------C--C-----------------]

CebrOK033_J_166                                         MLRFPIFLLLLLVLSPAAGFPVESKLENLWARMLSRDFGEEHRTNNRR- ILPLCCTQQGSPCPSCSPT---------------
OK212_J_197                                             MLRFPIFLLLLLVLSPAAGFPVESKLENLWARMLSRDFGEEHRTNNRR- ILPLCCTQQGSPCPSCSPT---------------
OK214_J_206                                             MLRFPIFLILLLVLSPAAGFPVESKLENLWARMLSRDFGEEHRTNNRR- ILPLCCTQQGSPCPSCV-----------------
CebrOK035_J_235                                         MLRFPIFLILLLVLSPAAGFPVESKLENLWARMLSRDFGEEHRTNNRR- ILPLCCMQQGSPCSSCIPT---------------
CebrOK035_J_236                                         MLRFPIFLLLLLVPSPAADFPVESKLENLWARMLSRDFGEEHRTNNRR- ILPLCCTQQGSPCPSCV-----------------
OK214_J_207                                             MLRFPIFLLLLLVPSPAADFPVESKLENLWARMLSRDFGEEHRTNNRR- ILPLCCTQQGSPCPSCV-----------------
CebrOK033_J_167                                         MLRFPIFLLLLLVLSPAAGFP---------------DFGEEHRTNNRR- ILPLCCTQQGSPCPSCSPT---------------
CebrOK035_J_237                                         MLRFPIFLILLLVLSPAAGFP---------------DFGEEHRTNNRR- ILPLCCTQQGSPCPSCV-----------------
CebrOK035_J_238                                         MLRFPIFLILLLVLSPAAGFP---------------DFGEEHRTNNRR- ILPLCCMQQGSPCSSCIPT---------------
OK214_J_208                                             MLRFPIFLILLLVLSPAAGFP---------------DFGEEHRTNNRR- ILPLCCMQQGSPCSSCIPT---------------
A_0055_143                                              MLSIPIFIILLLVLSPAAIFPVESKLASLWPRMLSRGLGEQHHTFDRK- --QLCCLSPGGTC--CPPVSS-------------
ermineusAXL95512                                        -----IFIILLLFLSPAAGFPVESKLVSLGTRMLSRNLGEQHHTFDRK- -QTLCCLTPGSDC--CGRDRYYSKALKNGQLRKK
ermineusAXL95513                                        -----IFIILLLFLS-----PVESKLESLGTRMLSRSLGEQHHTFDRK- -QTLCCLTPGSDC--CGRDRYYSKALKNGQLRKK
OK212_J_198                                             MLRLPIFLILLLVLSPAAGIPVESELQRDLTQESAKDLGMETEHLLSR- --DGCCRPGNTSC--CGRK---------------
OK005_J_203                                             MLRLPIFLILLLVLSPAAGIPVESELQRDLTQESAKDLGMETEHLLSR- --DGCCRPGNTSC--CGRK---------------
magusQFQ61117                                           MLRLPIFLIVLLVLSSAAGFPVESKLQRDLTQESPKDFGMRAKHL---- ----------------------------------
betulinusAMP44631                                       MLCIPIFIILLLVLSPAASLPVESELQRDLTQESPKDLGMRNEHLLLKK VADDCCVGKVGTC--CR-----------------
SRX1323887_E_157                                        MLGLPIYIILLLLVSPAATLPVGSELQRDLTHESPKDLGMRTDYLPFRD VGDDCCSDNVGTC--CK-----------------
                                                       
[Superfamily T-2 WF]                                       
[No Framework of T-2]                                    

[                                                       /------Signal------/------Pro----------------------//C---------------C--]
										                
CebrOK033_J_168                                         MLRLPIFILLLLALSPAASVPAEPELQRDLTRQSPKDFGMRNKHLPRVPWLR CLFKPGGWGGVRRDPMC---
CebrOK035_J_239                                         ------------------------ELQRDLTQQSPKDFGMRNKHLPRVPWLR CLFKPGGWGGVRRDPMC---
OK212_J_199                                             MLRLPIFILLVLALSPAASVPAEPELQRDLTRQSPKDFGMRTKHLPRVPWLR CLFKPGGWGGVRRDPMC---
OK005_J_204                                             MLRLPIFILLVLVLSPAASVPAEPELQRDLTRQSPKDFGMRTKHLPRVPWLR CLFKPGGWGGVRRDQMC---
OK214_J_209                                             MLRLPIFILLVLVLSPAASVPAEPELQRDLTRQSPKDFGMRTKHLPRVPWLR CLFKPGGWGGVRRDQMC---
OK006_E_186                                             MLRLPIFILLVLVLSPAASVPVEPELQRDLTRQSPKDFGMRTKHLPRVPWLR CLFKPGGWGGVRRDQMC---
OK193_E_181                                             MLRLPIFILLVLVLSPAASVPAEPELQTDLTRQSPKDFGMRTKHLPRVPWLR CLFKPGGWGGVRRDQMC---
OK213_E_217                                             MLRLPIFILLVLALSPAASVPAEPELQTDLTRQSPKDFGMKTKHLPRVPWLR CLFKPGGWGGVRRDRMC---
OK213_E_218                                             MLRLPIFILLVLVLSPAVSAPAEPELQRDLTRQSPKDFGMKTKHLPRVPWLR CLFKPGGWGGVRRDRMC---
CebrOK033_J_169                                         MLRLPIFILLLLALSPAASVPVERQLQRDLTRQSPKDFGMRNKHLPRVPWLR CLFKPGGWGGVRRQQMC---
CebrOK035_J_240                                         MLRLPIFILLVLALSPAASVPVERQLQRDLTRQSPKDFGMRNKHLPRVPWLR CLFKPGGWGGVRRQQMC---

CebrOK033_J_170                                         MLRLPIFILLLLALSPAASVPAEPELQRDLTRQSPKDFGMRNKHLPRGPWID CSQI-SDCLDDDDGD-----
OK214_J_210                                             MLRLPIFILLVLVLSPAASVPAEPELQRDLTQVSPKDFGMRTKHLPRGPWID CTQI-SDCLDDDDGD-----
CebrOK035_J_241                                         MLGLPIFLLLLLVLSPAASVPVDSELQRDVTQVSPKDFGMRTKHLPRGPWID CSQI-SDCLDDDDGD-----
OK214_J_211                                             MLGLPIFLLLLLVLSPAASVPVDSELQRDLTQVSPKDFGMRTK--------- --------------------
OK213_E_219                                             MLGLPIFLLLLLVLSPAASVPVVSELQRDLTRQSPKDFGM------------ --------------------
OK006_E_187                                             MLGLPIFILLLLVLSPAAGVPVDSELQRDLTRQSPKDFGMRTEHLPRKPWID CSQS-DDCVGDDNIEE----
CebrOK035_J_242                                         MLRLPIFILLVLVLSPAAGVPVESELQRDLTQQSPKDFGMRTKHLPRDPWID C-------------------
OK213_E_220                                             MLRLPNFILLLLALSPAASVPVEPELQRDLTRRSPKDSGMRTKGVP--PWIN CPPTPKDCPWDKFGKTSAHK
OK193_E_182                                             MLGLPIFLLLLLVLSPAASVPVDSELQRDLTRRSPKDSGMRTKGVP--PWIN CPPTPKDCPWDKFGKTSAHK
CebrOK033_J_171                                         MLRLPIFILLVLVLSPAASVPVESELQRDLTQQSPKDFGMRNKGPDPDAWVD CSNFPEQCPGMIEE------
CebrOK033_J_172                                         MLRLPIFILLLLALSPAASVPVESELQRDLTQQSPKDFGMRNKGPDPDAWVD CSNFPEQCPGMIEE------
CebrOK033_J_173                                         MLRLPIFILLVLVLSPAASVPVESELQRDLTQQSPKDFGMRNKGPDPDAWVD CSNFPEHCP-----------
CebrOK035_J_243                                         MLRLPIFILLVLALSPAASVPVESELQRDLTQQSPKDFGMRTKGPDPDAWVD CSNFPEHY------------
CebrOK035_J_244                                         MLRLPIFILLVLALSPAASVPVESELQRDLTQQSPKDFGMRTKGPDPDAWVD CSNFPEHCP-----------
CebrOK035_J_245                                         MLRLPIFILLVLALSPAASVPAEPELQRDLTQQSPKDFGMRTKGPDPDAWVD CSNFPEHY------------
CebrOK035_J_246                                         MLRLPIFILLVLALSPAASVPAEPELQRDLTQQSPKDFGMRTKGPDPDAWVD CSNFPEHCP-----------
OK214_J_212                                             MLRLPIFILLVLVLSPAASVPAEPELQRDLTQQSPKDFGMRTKGPDPDAWVD CSNFPEQCPGMIEK------
CebrOK033_J_174                                         MLRLPIFILLLLALSPAASVPAEPELQRDLTRQSPKDFGMRNKGPDPDAWVD CSNFPEQCPGMIEE------
magusQFQ61117                                           MLRLPIFLIVLLVLSSAAGFPVESKLQRDLTQESPKDFGMRAKHL------- --------------------
SRX1323887_E_158                                        MLRLPIFILLLLALSPAASVPVESELQRDLTQQSAKDFGMRTNSLL--PWVS CLPMGNDCPLKKPRMTSAHK
ermineusAXL95495                                        MLRLPIFLILLLVLSSAAGFPAESELERDLTLESSKDFGMRSVPLPPFEVLQ NYDEKDDSGR----------
OK006_E_188                                             MLCLPVFIILLLLVSPAATMPVDLEILKAPTKESRKDFEMRIELL------- --------------------

[Superfamily T-3]  
[Framework V]                       
[                                                       /-----Signal-------/----Pro----/ /-------------------------------CC-------CC--]

OK212_J_200                                             MLCLPVFIILLLLASPAAPKSLETRIQNDLIR AGLTDADLKTEKGFLSGLL-------NVAGSVCCKVDTS--CCSNQ---
OK214_J_213                                             MLCLPVFIILLLLASPAAPKSLETRIQNDLIR AGLTDADLKTEKGFLSGLL-------NVAGSVCCKVDTS--CCSNQ---
OK006_E_189                                             MLCLPVFIILLLLASPAAPKSLETRIQNDLIR AGLTDADLKTEKGFLSGLL-------NVAGSVCCKVDTS--CCSNQ---
SRX1323887_E_159                                        MLCLPVFIILLLLASPAASNPLETRIQSDLIR AALEDADMKTEKGFLSSIVGNLGTVGNLVGSVCCQITNS--CCPED---
SRX1323887_E_160                                        MLCLPVFIILLLLASPAASNPLETRIQSDLIR AALEDADMKTEKGVLNAIFSNLGDLGNLVSSVCCKATTS--CCPED---
SRX1323887_E_161                                        MLCLPVFIILLLLASPAASNPLETRIQSDLIR AALKDADMKNDPRFLGALV-------SGAATVCCQFVKASFCCGKK---
OK005_J_205                                             -----------------------------LIR AALKDADMKNDPRFLGALV-------SGAATVCCQFVKASFCCGKK---
CebrOK035_J_247                                         MLCLPVFVILLLLASPAVPKPLETNFQSDLIR AALGDADMNTEKGLRD----------------CCPGPFF--CCEK----
CebrOK014_E_104                                         MLCLPVFIILLLLASSAAPNPLDTNLQSDLIR AALGDADQKGQKGLLY--------------RHCCPVVWE--CCQK----
OK006_E_190                                             --CLPVFIILLLLASPAAPKSFETKVQSDLTR T---DGNMETEENL-----------GEVRKVYCCLGVRDDWCCAGQIQI
OK214_J_214                                             --CLPVFIILLLLASPAAPKSFETKVQSDLTR T---DGNMETEENL-----------GEVRKVYCCLGVRDDWCCAGQIQI
litteratusQ1A3Q6                                        MLCLPVFIILLLLASPAAPKSLETRIQNDLIR AGLTDADLKTEKGFLSGLL-------NVAGSVCCKVDTS--CCSNQ---
litteratusQ1A3Q1                                        MLCLPVFIILLLLASPAAPKSLETRIQNDLIR AGLTDADLKTEKGFLSGLL-------NVAGSVCCKVDTS--CCSSQ---


[Superfamily T-3 WF]
[No Framework]

SRX1323887_E_162                                        MLCLPVFIILLLLASSAAPNPLEKRIQSDLIRAALEESDTK-TQERF-LTGLISTIGNLLSG-----------------
SRX1323887_E_163                                        MLCLPVFIILLLLASSAAPNPLEKRIQSDLIRAALEELNPG-TQERFSFSKLLNIAKNVANAANQI-----LN---PAE
CebrOK035_J_248	                                        MLCLPVFIILLLLASSAAPNPLEKRIQSDFIRAALEELNPE-TQERFSFSKLVDIAKNVASAANQI-----LN---PA-
tessulatusQ9BPD9                                        MLCLPVFIILLLLASPAAPNPLETRIQRDLIRAALEDADMK-TNERF-LEGVISTIK---DFAGKVCCSVSVNFCCPTA
ermineusAXL95547                                        MLCLPVFIILLLLVSSAAPNPLETRIQSDLIRAALEDADLK-TKERF-LSGILGNAGPISDLVSKFCCSV-LPICCVMT

[Superfamily T-3 WFb]  
[No Framework]                       
[                                                       /-----Signal-----/----------------------Pro--------------------/ CC---/-Post]

OK214_J_215                                             MLCLPVFIILLLLASSAAPGPLEPNPQSDLIRAALGDADLKGLTGVF--------------YRR CCHFPRKR----
OK212_J_201                                             MLCLPVFIILLLLASSAAPGPLEPNPQSDLIRAALGDADLKGLTGVF--------------YHR CCHFPRKR----
CebrOK033_J_175	                                        MLCLPVFIILLLLASSAAPGPLEPNPQSDLIRAALGDADLKGLTGVF--------------YRR CCHFPRKR----
CebrOK035_J_249	                                        MLCLPVFIILLLLASSAAPGPLEPNPQSDLIRAALGDADLKGLTGVF--------------YRR CCHFPRKR----
terebraAGK23233                                         MLCLPVFIILLLLASPAAPTPFETNLQSDLTRAGPRDADMKSMRGIF--------------STL CCGVGINSCC--
ermineusAXL95549                                        MLCLPVFIILLLLVSSAAPNPLETRIQSDLIRAALEDADMKTEKGVLSGLFANLGPISELASTF CCAL-IPKCCPE
                                                         
[Superfamily T-4]  
[Framework V]                                                                                

[                                                       /-------Signal----/--Pro---/ /---------------------------CC-----CC/P]

OK213_E_221                                             MRCLPVVVFLLLLLSAAAAPGVGSKTER LPGLTSS---GDSDESLPFL---NTI--CC-WSGACCGG
OK005_J_206                                             MRCLPVVVFLLLLLSAAAAPGVGSKTER LPGLTSS---GDSDESLPFL---NTI--CC-WSGACCGG
OK193_E_183                                             MRCLPVVVFLLLLLSAAAAPGVGSKTER LPGLTSS---GDSDESLPFL---NTI--CC-WSGACCGG
OK006_E_191                                             MRCLPVVVFLLLLLSAAAAPGVGSKTER LPGLTSS---GDSDESLPFL---NTI--CC-WSGACCGG
OK006_E_192                                             MRCLPVVLLLLLLLSSAAALAVGSRTEG LQGLKSI---DDFGDSAQSLPFLNTI--CC-ATGACCGG
SRX1323887_E_164	                                    MRCLPVVVFLLLLLSAAAAPGVGSKTER LPGLTSS---GDSDESLPFL---NTI--CC-WSGACCGG
imperialisH8Y1U0                                        MRCLPVVVFLLLLLSAAAAPGVGSKTER LPGLTSS---GDSDESLPFL---NTI--CC-WSGACCGG
imperialisAME17690                                      MRCLPVVVFLLLLLSAAAAPGVRSKTER LPGLTSS---GDSDESLPFL---NTI--CC-WSRACCGG
 
[Superfamily T-5] 

[Framework V]                                                                                 
[                                                       /----------Signal------/-----------------Pro-----------------/ /----------CC-----CC/Pos]

OK006_E_193                                             MNCLPVFLIALLLIAYSSQVAETSTDRAPPIDGPPRRQPTLDAKMDNMTEMLQSMHATMTKR LDEAPEI----CCSIFLSCCK----
CebrOK014_E_105	                                        MNCLPVFLIALLLIAYSSQVAETSTDRAPPIDGPPRRQPTLDAKMDNMTEMLQSMHATMTKR LDEAPEI----CCSIFLSCCK----
praecellensATF27787                                     MNCLPVFFIVLLLIAHSSEVVEHSKLK--------------------RTKMLHQTTA----- -RGFEEVRERIACVLQLSCGK----
andremeneziATF27556                                     MKCLPVFFIVLLLIAHSSQVAEHSKLG--------------------RIKMLRRLTAAIILE DEGFPEL----CCPSDKDCCEALSN


[Superfamily U-1a]  
[Framework XII]
[                                                       /--------Signal---------/---Pro-/ /----C---C--C-----C-CC----C------C----------------]

OK214_J_216                                             MIRMGLFLTLTVAVLLTSFICTEGAPAENLEVK GRTNDCPENCETCNPDLPCGCCGTVICHASAKLCEAISNPYEDYENY----
OK212_J_202                                             MNRMGFFLMLTVAVLLTSFICTEGAPAENLEVK GRTNDCPENCETCNPDLPCGCCGTVICHASAKLCEAVSNPYEDYENY----
CebrOK033_J_176                                         ---MGSFLMLTVAVLLTSFICTEGAPAENLEVK GRTNDCPENCETCNPDLPCGCCGTVIC------------------------
OK005_J_207                                             MIRMGLFLTLTVAVLLTSFICTEGAPAENLEVK GRTNDCPENCETCNPDLPCGCCGNVICHSTG-ICQLVSDPHEDY-------
OK214_J_217                                             MIRMGLFLTLTVAVLLTSFICTDGVPAENMELK RRTDDCSGDCMTCSSDLPCGCCGNVICHSTG-ICQLVSDPYEDY-------
OK005_J_208                                             MIRMGLFLTLTVAVLLTSFICTDGVPAENMELK RRTDDCSGDCMTCSSDLPCGCCGNVICHSTG-ICQLVSDPHEDY-------
OK212_J_203                                             MIRMGLFLTLTVAVLLTSFICTDGVPAENMELK RRTDDCSGDCMTCSSDLPCGCCGNVICHSTG-ICQLVSDPHEDY-------
CebrOK035_J_250                                         MIRMGLFLTLTVAVLLTSFICTDGVPAENMELK RRTDDCSGDCMTCSSDLPCGCCGNVICHSTG-ICQLVSDPHEDY-------
OK193_E_184                                             ---MGFFLTLTVAVLLTSLICTDGAPAKKLEVK ---SDCSGDCMTCSSDLPCGCCGNVICHSTG-ICQLVSDPYEDY-------
SRX1323887_E_165                                        ---MGFFLTLTVAVLLTSLICTDGAPAKKLEVK ---SDCSGDCMTCSSDLPCGCCGNVICHSTG-ICQLVSDPYEDY-------
CebrOK014_E_106                                         MIRMGFFLTLTVAVLLTSLICTDGAPAKKLEVK ---SDCSGDCMTCSSDLPCGCCGNVICHSTG-ICQLVSDPYEDY-------
CebrOK035_J_251                                         MNRMGFFLMLTVAVLLTSLICTDGAPAEKLEVE ---RDCYGDCMTCS-------------------------------------
CebrOK035_J_252                                         ---MGFFLMLTVAVLLTSLTCTDGAPAEKLELK RRDDDCTWDCMTCSSDLPCGCCGNVICHSDG-VCQWVSDAYD-FGYYYFYY
SRX1323887_E_166                                        MIRMGFFLMLTVAVLLTSLTCTDGAPAENVKLK SARDDCSWDCETCDPDVPCGCCGNVICHSDG-TCQLVSDPYNDDGHY----
OK212_J_204                                             -------------------ICTDGVPAEKLEVK ---SGCSGDCMTRSSDAPCGCCGNVICHSNG-VCQLVSDYSNNY--YGPYY
CebrOK035_J_253                                         MIRMGLFLTLTVAVLLTSFICTDGVPAENMELK RRTDDCPQHCVKCNDN--CDCCYSKYCKNNR-ECKPL--PHQ---------
A_0039_089                                              MNRMGFFLTLTVVVLLTSLTYTDGAPAEKLEVK ---SDCSGDCETCDDDVPCGCCGNVICHENG-LCQLVSDPYGDYDYY----
A_0239_049                                              MNRMGFFLTLTVVVLLTSLTYTDGAPAEKLEVK ---SDCSGDCETCDDDVPCGCCGNVICHENG-LCQLVSDPYGDYDYY----

[Superfamily U-1b]  
[Framework VI/VII]
[                                                       /-----------Signal------/--Pro---/ /--------C--C-----CC-----C----C--------------]

OK193_E_185                                             ---MGFFLTLTVAVLLTSLICTEAVPTDEGEVER HFNLAVLGGCRFCV--IWCCPPRGVCQSSGCR----PAYEALQTGQ
OK213_E_222                                             MNRMGFFLTLTVAVLLTSLICTEAVPTDEGEVER HFNLAVLRGCRFCV--IWCCPPRGVCQSSGCR----PAYEALQTGQ
OK212_J_205	                                            MNRMGFFLMLTVAVLLTSLICTKAVPTDEGEVER LFNLAVLRGCRFCV--IWCC--------------------------
V_CG13_033                                              MNRMGFFLTLTVVVLLTSLTCTDGAPAEKLEVKR DFE----KRCVPCAPGYKCC---GVCVGSSCTGDQIPA-------K
V_1258_050                                              MNRMGFFLTLTVVVLLTSLTCTDGAPAEKLEVKR DFE----KRCVPCAPGYKCC---GVCVGSSCTGDQIPA-------K
V_1302_183                                              MNRMGFFLTLTVAVLLTSLTCTDGAPAEKLEVKR DFE----KRCVPCAPGYKCC---GVCVGSSCTGDQIPA-------K

[Superfamily U-2]  
[Framework VI/VII]
[                                                       /-------Signal----------/-------Pro---------/ /C--C---CC----C----C--]


OK213_E_223	                                            MIRMGFFLTLTVAVLLTSLICTEAVPTDKRAMERLFDHVLLKGQR NCPYCVVYCCPPAYCQASGCRPP
OK213_E_224	                                            MNRMGFFLTLTVAVLLTSLICTEAVPTDKRAMERLFDHVLLKGQR NCPYCVVYCCPPAYCQASGCRPP
SRX1323887_E_167	                                    MNRMGFFLTLTVAVLLTSLICTEAAPYDEGEMKRLFSHELLRDRA VCPYCKVRCCHPNYCQPSGCR--
CebrOK014_E_107	                                        MIRMGFFLTLTVAVLLTSLTCTEAVPTDKRAMERLFDHVLLKGQR NCPYCVVYCCPPAYCQASGCRPP
CebrOK016_E_118	                                        MIRMGFFLTLTVAVLLTSLTCTEAVPTDKRAMERLFDHVLLKGQR NCPYCVVYCCPPAYCQASGCRPP
CebrOK033_J_177	                                        MIRMGFFLTLTVAVLLTSLTCTEAVPTDKRAMERLFDHVLLKGQR NCPYCVVYCCPPAYCQASGCRPP
OK005_J_209  	                                        MIRMGLFLTLTVAVLLTSLTCTEAVPTDKRAMERLFDHVLLKGQ- -----------------------
amadisAXL93751                                          MIRMGFFLTLTVAVLLTSLTCSEAVPTDKREMERLFDRILLKDQR QCPYCVVHCCPPSYCQASGCRPP

[Superfamily V-1a]                    
[Framework XV]                        
[                                                       /--------Signal---------/----------Pro----------/ /-C--C----CC--C-C-----C-C---/P]
													    
OK212_J_206                                             MAAPRMMSFILLLLLSLAIHCADGKEVQGDGDPSASLLTGDKNHDLPVK RDCTTCSGEECCGRCTCSWGN-CNCISWGK
OK212_J_207                                             MAAPRMMSFILLLLLSLAIHCADGKEVQGDGDPSASLLTGDQNHDLRVK RACITCNGEECCGKCTCLWGDTCSRSGWGK
CebrOK035_J_254	                                        --------------------------MQGDRDPSASLLRGDKDHDPSVK RTCGTCNGAECCGRCSCPWGN-CTCVENGK
CebrOK035_J_255	                                        MAAPRMMPLIPLLLLSLAIHCADGKAVQGDRDPSASFLTGDKNHDLPVK RDCTTCSGEECCGRCSCTWGDNCDCIQWRK
CebrOK035_J_256	                                        MAAPRMMPLIPLLLLSLAIHCADGKAVQGDRDPSASFLTGDKNHDLPVK RDCITCDGEECCGRCSCTWGGNCDCIDWGK
CebrOK016_E_119	                                        MAAPRMMSFILLLLLSLAIHCAHGKAVQGDGDPSASLLTGDQNHDLRVK ------------------------------
CebrOK035_J_257	                                        MAVPRMMPLILLLLLSLAIRCGDGKAIQGDKDLSASLLTGDKNHDLSVK DECVTCDGEEC-------------------
SRX1323887_E_168	                                    MATPRMMPVILLLLLSLAIRCADGKAVQGDSDPSASLLTGDKNHDLPVK RDCTTCAGEECCGRCTCPWGDNCSCIEWGK
flavidusAFU50811                                        MSTPRMTPFILLLLFSLTIRCGDGKAIQEDRDPSARLLTGDKNHDLSVK DDCNICGGEECCGRCTCAFGN-CSCIAWGK
flavidusAFU50812                                        MSTPRMTPFILLLLFSLTIRCGDGKAIQGDRDPSASLLTGDKNHDLSVQ IDCGTCDGEECCGVCICSFGN-CSCTPWGK

[Superfamily V-4]                  
[Framework VI/VII]                        
[                                                       /---------Signal--------/-------Pro--------/ /------C--C----CC--C----------C-/Po]
									 
OK214_J_218                                             MSTPRMMLLIVLLLLPLEIPCGDGQAFQGDRRLRMSLLRRYKER DQ---VVCPLCDGSPCCGRCD--RVWESYHCINIGK
OK213_E_225                                             MSTPRMMLLIVLLLLPLEIPCGDGQAFQGDRRLRMSLLRRYKER DQ---VVCPLCDGSPCCGRCD--RVWESYHCVNIGK
SRX1323887_E_169	                                    MSTPRMMLLIVLLLLPLEIPCGDGQAFQGDRRLRMSLLRRYKER DQ---VVCPLCDGSPCCGRCD--RVWESYHCINIGK
CebrOK033_J_178	                                        ----------------------DGQAFQGDRRLRMSLLRRYKER DQ---VVCPLCDGSPCCGRCD--RVWESYHCINIGK
OK005_J_210	                                            MSTPRMMLLIVLLLLPLEIPCGDGQAFQGDRRLRMSLLRRYKER DQ---VVCPLCDGSPCCGRCD--RVWESYHCIN---

flavidusAFU50807                                        MSTPRMMPFILLLLFSLTIRCGDGKAIQGDRDPSASLLKGDKSR DLLVKRGCSICNGGQCCGLCLYSRIISRYMCLPVAK
magusDAC80604                                           MSTPRMMLLILLLLLPLETPCGDGQAIQGDRRLRASLLSRYKEY NRPV-KNCKSCGGPECCGRC----------------


[Superfamily Y-1]                        
[Framework XVII]                     
[                                                       /-------Signal------/---------Pro--------//C------C-------CC----C---CC------C-]
									 
OK212_J_208                                             MQKATVLILAILLLLPLSTARDDVGSQENAAPRNIDIAT--R CRGTGVYCNDNEGKTCCTGLKCVDNCCWTSTNGCP-
OK214_J_219                                             MQKATVLILAILLLLPLSTARDDEGSQENAAPRNINIAT--R CRGTGVYCNDNEGKTCCTGLKCVDNCCWTTTNGCP-
OK005_J_211                                             MQKATVLILAILLVLPLSTARDDEGSQENAAPRNINIAT--R CRGTGVYCNDNEGKTCCTGLKCVDNCCWTSTNGCP-
OK214_J_220                                             MQKATVLILAILLLLPLSTARDDEGSQENAAPRNIDIAT--R CGGTRADCNEPAGQSCCNGLKCVNNCCWTTTDGCPS
OK006_E_194                                             MQKAIVLILAILLLLPLSTAQDDEGSQENAAPRKRDTAS--Q CGGTGTHCNEPEGQNCCTSLKCVNNCCWTTTEGCPS
OK213_E_226                                             MQKAIVLILAILLLLPLSTAQDDEGSQENAAPRKRDTAS--Q CGGTGTHCNEPEGQNCCTSLKCVNNCCWTTTEGCPS
SRX1323887_E_170                                        MQKAIVLILAILLLLPLSTAQDDEGSQENAAPRKRDTAS--Q CGGTGTHCNEPEGQNCCTSLKCVNNCCWTTTEGCPS
OK193_E_186                                             MQKAIVLILAILLLLPLSTAQDDEGSQENAAPRKRDTAS--Q CGGTGADCNEPEGQNCCTSLKCVNNCCWTTTEGCPS
CebrOK035_J_258	                                        MQKATVLILAILLLLPLSTARDDEGSQENAAPRNIDIAT--R CRGTGDHCNDNEGKTCCTGLKCVDNCCWTTTNGCP-
CebrOK033_J_179	                                        MQKATVLILAILLLLPLSTARDDEGSQENAAPRNINIAT--R CRGTGVYCNDNEGKTCCTGLKCVDNCCWTSTNGCP-
OK006_E_195	                                            ---------------------DDEGSQENAAPRNINIAT--R CRGTGVYCNDNEGKTCCTGLKCVDNCCWTSTNGCP-
CebrOK035_J_259	                                        MQKATVLILAILLLLPLSTARDDEGSQENAAPRNIDIAT--R CGGTRADCNEPAGQSCCNGLKCVNNCCWTTTDGCPS
CebrOK014_E_108	                                        MQKAIVLILAILLLLPLSTAQDDEGSQENAAPRKRDTAS--Q CGGTGTHCNEPEGQNCCTSLKCVNNCCWTTTEGCPS
CebrOK016_E_120	                                        MQKAIVLILAILLLLPLSTAQDDEGSQENAAPRKRDTAS--Q CGGTGTHCNEPAGQNCCTGLKCVNNCCWTTTEGCQS
caracteristicusB4YSU8                                   MQKATVLLLALLLLLPLSTAQDAEGSQEDAAQREVDIAT--R CGGTGDSCNEPAGELCCRRLKCVNSRCCPTTDGC--
betulinusAMP44751                                       MQKATVLILAILLSLPLSTAQDDEGSQENAAQRDVDITTLAP CGGTGDPCNEPAGQLCCSLLKCVSSHCCPTTDGC--

[Cerm Superfamily 01]   
[Framework VI/VII]
[                                                       /-----Signal------/-----Pro-------/ /-------C-------C-------CC---C-----C--------/]

OK214_J_221                                             MRFYMLLAVALLLNSVMSTGDVSIHEKDATRRKKR NDVSPDNPCPSDVPYYCLSLKADTCCKTECDSGNRCNSPTYEIWR
CebrOK033_J_180	                                        MRFYMLLAVALLLNSVMSTGDVSIHEKDATRRKKR NDVSPDNPCPSDVPYYCLSLKADTCCKTECDSGNRCNSPTYEIWR	
CebrOK035_J_260	                                        MRFYMLLAVALLLNSVMSTGDVSIHEKDATRRKKR NDVSPDNPCPSDVPYYCLSLKADTCCKTECDSGNRCNSPTYEIWR	
OK005_J_212	                                            MRFYMLLAVALLLNSVMSTGDVSIHEKDATRRKKR NDVSPDNPCPSDVPYYCLSLKADTCCKTECDSGNRCNSPTYEIWR	
OK212_J_209                                             MRFYMLLAVALLLNSVMSTGDVSIHEKDATRRKKR NDVSPDNPCPSDVPYYCLSLKADTCCKTECDSGNRCNSPTYEIWR
OK213_E_227                                             ----MLLAVALLLNSVMSTDDVSIREKDATRREKR VN---DNPCPPEVGNYCLSLNAHTCCKTECDSGNRCNSNVYKIWE
CebrOK016_E_121	                                        MRFYMLLAVALLLNSVMSTDDVSIREKDATRREKR VN---DNPCPPEVGNYCLSLNAHTCCKTECDSGNRCNSNVYKIWE	
ermineusAXL95486                                        MRFYMLLAVALLLTSVMSTDDVSIHQTGATRQEKK DD---DSPCPPAHPHYCHSLKVLTCCKTECDLGNRCNSNDYEIWA
ermineusAXL95604                                        MRFYMLLAVALLLTSVMSTDDVSIHQTGATRREKK DD---DSPCPPAHPHYCHSLKVLTCCKTECDLGNRCNSYDYRIWE


[Cerm Superfamily 02]                  
[Framework VI/VII]                   
[                                                       /-----Signal---------/--------Pro-------/ /C--C---CC----C----C-------]
								      
OK213_E_228                                             MRFLLFLCIAVLLTSFRETEARLPDKAFRQRQSQYIQRIQR  CPFCGFTCCSPNYCQGLDCVIVSSNDE
OK193_E_187                                             MRFLLFLCIAVLLTSFRETEARLPDKAFRQRQSQYIQRIQR  CPFCGFTCCSPNYCQGLDCVIVSSNDE
OK212_J_210                                             MRFLLLLCIVVLLTPFRETEARLPEKSFRQRQAHPFQRIQR  CPWCGMSCCSPNYCQGVTCTIVG----
SRX1323887_E_171	                                    MRFLLFLCIAVLLTSFRETEARLPDKAFRQRQSQYIQRIQR  CPFCGFTCCSPNYCQGLDCVIVSSNDE
betulinusAMP44726                                       MRFLLFLCIVVLLTSFRETEARLPDKAFRQRQSQYIQRVQR  CPWCGFICCPPNYCQGLTCQVVEADDE
ermineusAXL95477                                        MRFLLFLCIAVLLTSFRETEARLPDKAFRQRQSQYIQRIQR  CPWCGHSCCYPNYCQGVTCKIA-----

SRX1323887_E_172	                                    MRLLLLLCIVVLLTPFRETEARLPDKAFSQRQAQAIQRIQR  CPWCNMPCCSPNFCQGLDCTIVD----
SRX1323887_E_173	                                    MRFLLFLCIAVLLTSFRETEARLPDKAFRERQSQYFQRDQS  CPWCGFTCCPPNYCQGLTCTIV-----
OK006_E_196	                                            MRFLLFLCIAVLLTSFRETEARLPDKAFRQRQSQYIQRIQR  CPFCGFTCCS-----------------
CebrOK016_E_122	                                        MRFLLLLCIVVFLTPFRETEARLPEKSFRQRQAHPFQRIQR  CPWCGMSCCSPNYCQGVTCTIVG----
CebrOK016_E_123	                                        MRFLLLLCIVVLLTPFRETEARLPDKAFRERQSHYFQRVQR  CPWCGFASCSPNYCQGLTCTIV-----


[Cerm Superfamily 02-2]

[Framework XIV]                   
[                                                       /-----Signal---------/-----Pro----/ /-C--C----CC----C----C--/P]
								      
OK213_E_229                                             MRVLLFLALAVLLTSFIETEGRLVSELLKNPRAKR QQCVSCGGKNYCTPKNCNGGQCYSGR
OK005_J_213                                             MRVLLFLALAVLLTSFIETEGRLVSELLKNPRAKR QQCVSCGGKNCCAPKNCNGGQCSSGR
CebrOK033_J_181	                                        MRVLLFLALAVLLTSFIETEGRLVSELLKNPRAKR QQCVSCGGKNCCAPKNCNGGQCYSGR
CebrOK035_J_261	                                        MRVLLFLALAVLLTSFIETEGRLVSELLKNPRAKR QQCVSCGGKNCCAPKNCNGGQCYSGR
betulinusAMP44619                                       MRVLLFLALAVLLTSFTETEGGLVSELFKNPKAKR QSCVTCGGKNCCAPKTCNGSTCYSGR
betulinusAMP44701                                       MRVLLFLALAVLLTSFTETEGGLVSELFKNPKAKR QSCVTCGGKNCCAPKTCNGSTCYSGR

[Cerm Superfamily 03-1]  
[Framework XIV]
[truncated: 310,071 more chars]
