# Supplementary material for: Comparative Venomics of the Cryptic Cone Snail Species Virroconus ebraeus and Virroconus judaeus
Source: Mar Drugs. 2022 Feb 17;20(2):149. doi: 10.3390/md20020149 (PMC8875821; doi:10.3390/md20020149)
Supplement: Supplementary file 1 [file marinedrugs-20-00149-s001.zip › Supplementary File S3.tree]

(OK212_J_275_Virro02:0.00000002,OK214_J_296_Virro02:0.00000002,((((OK214_J_051_H_2a:0.00000001,(CebrOK035_J_045_H_2a:0.00000002,CebrOK033_J_036_H_2a:0.00000002)0.000000:0.00000001)0.000000:0.00000002,(OK214_J_052_H_2a:0.00000001,(OK213_E_047_H_2a:0.00000002,(OK193_E_041_H_2a:0.00000002,(CebrOK033_J_037_H_2a:0.00000002,((CebrOK035_J_046_H_2a:0.08646312,CebrOK035_J_047_H_2a:0.31243715)0.301000:0.09908595,((CebrOK014_E_014_H_2a:0.00000002,(CebrOK033_J_035_H_2a:0.00000002,(SRX1323887_E_039_H_2a:0.00000002,CebrOK035_J_044_H_2a:0.00000002)0.000000:0.00000002)0.000000:0.00000002)0.000000:0.00000002,(((CebrOK035_J_041_H_1a:0.00000002,(CebrOK035_J_042_H_1a:0.00000002,(OK005_J_035_H_1a:0.00000002,OK005_J_036_H_1a:0.00000002)0.000000:0.00000002)0.000000:0.00000002)0.000000:0.00000001,(OK214_J_050_H_1a:0.00000002,(OK006_E_053_H_1a:0.05272575,(OK213_E_043_H_1a:0.00000002,(((OK212_J_048_H_1a:0.00000002,OK212_J_049_H_1a:0.00000002)0.000000:0.00000002,((CebrOK035_J_043_H_1a:0.13109819,(OK005_J_037_H_1a:0.00000002,(CebrOK014_E_012_H_1a:0.00000002,((((CebrOK014_E_124_Rimp01:0.00000002,((CebrOK016_E_135_Rimp01:0.00000002,(OK006_E_239_Rimp01:0.00000002,(OK193_E_223_Rimp01:0.00000002,(SRX1323887_E_204_Rimp01:0.00000002,OK213_E_266_Rimp01:0.00000002)0.000000:0.00000002)0.000000:0.00000002)0.000000:0.00000002)0.000000:0.00000002,(CebrOK033_J_220_Rimp01:0.00000002,(CebrOK033_J_221_Rimp01:0.00000002,(CebrOK035_J_314_Rimp01:0.00000002,(OK005_J_279_Rimp01:0.00000002,(OK212_J_266_Rimp01:0.00000002,(OK214_J_273_Rimp01:0.00000002,(OK214_J_274_Rimp01:0.00000002,(CebrOK035_J_313_Rimp01:0.00000002,(OK214_J_275_Rimp01:0.00000002,OK212_J_267_Rimp01:0.00000002)0.000000:0.00000002)0.000000:0.00000002)0.000000:0.00000002)0.000000:0.00000002)0.000000:0.00000002)0.000000:0.00000002)0.000000:0.00000002)0.000000:0.00000002)0.925000:0.24001769)0.000000:0.00000002)0.967000:1.76327225,((OK006_E_055_H_2b:0.00000002,((OK213_E_050_H_2b:0.01671229,SRX1323887_E_040_H_2b:0.00000001)0.000000:0.00000001,OK193_E_043_H_2b:0.00000002)0.000000:0.00000002)0.000000:0.00000002,(OK005_J_041_H_2b:0.00000002,(CebrOK035_J_048_H_2b:0.00000002,OK214_J_053_H_2b:0.00000002)0.956000:0.05334451)0.147000:0.01665587)0.752000:0.79274097)0.766000:0.67160186,CebrOK014_E_013_H_1a:0.00000001)0.000000:0.00000001,(CebrOK033_J_032_H_1a:0.00000002,CebrOK016_E_014_H_1a:0.00000002)0.000000:0.00000002)0.000000:0.00000002)0.924000:0.05097148)0.723000:0.02958797)0.967000:0.15568510,(OK214_J_049_H_1a:0.00000002,((CebrOK033_J_031_H_1a:0.00000002,CebrOK033_J_029_H_1a:0.00000002)0.000000:0.00000002,(CebrOK033_J_030_H_1a:0.00000002,CebrOK033_J_033_H_1a:0.04759574)0.929000:0.05233029)0.832000:0.02616991)0.000000:0.00000001)0.812000:0.02566116)0.806000:0.02667787,((OK193_E_038_H_1a:0.00000002,OK213_E_044_H_1a:0.00000002)0.000000:0.00000002,(OK006_E_054_H_1a:0.00000002,SRX1323887_E_037_H_1a:0.00000002)0.920000:0.05390499)0.780000:0.02642258)0.787000:0.02641385)0.000000:0.00000002)0.837000:0.02603425)0.000000:0.00000001)0.998000:1.17412697,((OK005_J_039_H_2a:0.05906971,OK213_E_046_H_2a:0.03985388)0.806000:0.08361706,(OK005_J_038_H_2a:0.00000002,OK005_J_040_H_2a:0.00000002)0.000000:0.00000002)0.786000:0.09202791)0.000000:0.00000002)0.911000:0.19327454)0.000000:0.00000002)0.000000:0.00000002)0.000000:0.00000002)0.000000:0.00000001)0.830000:0.09563486)0.859000:1.01573348,(CebrOK035_J_325_SF-mi2:0.00000002,(((((CebrOK033_J_202_Cerm11_1:0.00000002,(CebrOK033_J_203_Cerm11_1:0.00000002,(CebrOK035_J_286_Cerm11_1:0.00000002,(OK214_J_252_Cerm11_1:0.00000002,OK212_J_245_Cerm11_1:0.00000002)0.000000:0.00000002)0.000000:0.00000002)0.000000:0.00000002)0.753000:0.03297550,((OK212_J_246_Cerm11_1:0.00000002,OK006_E_221_Cerm11_1:0.02776505)0.986000:0.21373345,(CebrOK035_J_287_Cerm11_1:0.00000002,CebrOK035_J_288_Cerm11_1:0.03186144)0.842000:0.07765326)0.825000:0.07955844)0.000000:0.00000002,((CebrOK035_J_285_Cerm11_1:0.00000002,(OK005_J_254_Cerm11_1:0.00000002,(OK005_J_256_Cerm11_1:0.00000002,(OK213_E_247_Cerm11_1:0.00000002,OK006_E_220_Cerm11_1:0.00000002)0.000000:0.00000002)0.000000:0.00000002)0.000000:0.00000002)0.000000:0.00000002,CebrOK033_J_201_Cerm11_1:0.02890163)0.000000:0.00000002)0.981000:0.60427595,((OK193_E_233_SF-mi2:0.00000002,(CebrOK014_E_130_SF-mi2:0.00000002,(CebrOK016_E_138_SF-mi2:0.00000002,(CebrOK016_E_139_SF-mi2:0.00000002,(OK005_J_287_SF-mi2:0.00000002,(OK006_E_256_SF-mi2:0.00000002,(OK213_E_276_SF-mi2:0.00000002,(OK213_E_277_SF-mi2:0.00000002,(OK214_J_286_SF-mi2:0.00000002,(SRX1323887_E_215_SF-mi2:0.00000002,SRX1323887_E_216_SF-mi2:0.00000002)0.000000:0.00000002)0.000000:0.00000002)0.000000:0.00000002)0.000000:0.00000002)0.000000:0.00000002)0.000000:0.00000002)0.000000:0.00000002)0.000000:0.00000002)0.000000:0.00000002)0.000000:0.00000002,(OK006_E_257_SF-mi2:0.00000002,OK006_E_258_SF-mi2:0.00000002)0.970000:0.13665186)0.000000:0.00000002)0.996000:0.85030156,((((SRX1323887_E_141_Q_1a:0.00000001,(SRX1323887_E_142_Q_1a:0.01926487,((CebrOK014_E_094_Q_1a:0.00000002,(CebrOK014_E_093_Q_1a:0.00000002,(OK006_E_181_Q_1a:0.00000002,CebrOK016_E_107_Q_1a:0.00000002)0.000000:0.00000002)0.000000:0.00000002)0.876000:0.03772843,((OK213_E_204_Q_1a:0.00000002,OK193_E_165_Q_1a:0.00000002)0.000000:0.00000002,((CebrOK033_J_154_Q_1a:0.02133329,OK005_J_185_Q_1a:0.00000002)0.000000:0.00000002,((CebrOK035_J_218_Q_1a:0.00000002,(OK214_J_192_Q_1a:0.00000002,OK214_J_193_Q_1a:0.00000002)0.000000:0.00000002)0.814000:0.02118020,(SRX1323887_E_143_Q_1a:0.33075513,((CebrOK033_J_152_Q_1a:0.01927101,(OK005_J_184_Q_1a:0.00000002,(OK193_E_164_Q_1a:0.00000002,(OK213_E_202_Q_1a:0.00000002,OK005_J_183_Q_1a:0.00000002)0.000000:0.00000002)0.000000:0.00000002)0.000000:0.00000002)0.000000:0.00000002,(((((((OK214_J_032_D_3:0.00000002,OK214_J_033_D_3:0.00000002)0.803000:0.01927262,((CebrOK033_J_025_D_3:0.00000002,CebrOK033_J_026_D_3:0.00000002)0.928000:0.01890297,(CebrOK035_J_036_D_3:0.00000002,(CebrOK035_J_037_D_3:0.00000002,(OK005_J_025_D_3:0.00000002,(OK005_J_026_D_3:0.00000002,(OK005_J_027_D_3:0.00000002,(OK212_J_036_D_3:0.00000002,OK212_J_037_D_3:0.00000002)0.000000:0.00000002)0.000000:0.00000002)0.000000:0.00000002)0.000000:0.00000002)0.000000:0.00000002)0.000000:0.00000002)0.000000:0.00000002)0.926000:0.32452395,(OK213_E_034_D_1:0.00000000,(OK213_E_035_D_1:0.00000002,(((OK193_E_028_D_1:0.00000002,OK006_E_030_D_1:0.00000002)0.000000:0.00000002,(SRX1323887_E_030_D_1:0.00000002,SRX1323887_E_029_D_1:0.02516448)0.846000:0.02389297)0.000000:0.00000002,(((OK212_J_033_D_1:0.00000002,OK212_J_034_D_1:0.00000002)0.786000:0.02339794,((OK214_J_031_D_1:0.05479892,((OK214_J_254_Cver02:0.00000002,((CebrOK035_J_291_Cver02:0.00000002,OK005_J_260_Cver02:0.00000002)0.000000:0.00000002,(OK006_E_223_Cver02:0.00000002,(OK193_E_206_Cver02:0.00000002,(OK213_E_248_Cver02:0.00000002,SRX1323887_E_186_Cver02:0.00000002)0.000000:0.00000002)0.000000:0.00000002)0.854000:0.02774848)0.383000:0.02823355)1.000000:2.26628274,CebrOK035_J_034_D_1:0.00000001)0.000000:0.00000001)0.756000:0.02767268,(OK005_J_022_D_1:0.00000002,OK005_J_023_D_1:0.00000002)0.759000:0.02369876)0.892000:0.04843528)0.779000:0.02384771,(OK214_J_030_D_1:0.02338167,(CebrOK035_J_035_D_1:0.02364595,(CebrOK033_J_024_D_1:0.00000002,CebrOK033_J_023_D_1:0.00000002)0.000000:0.00000002)0.000000:0.00000002)0.000000:0.00000002)0.926000:0.04754766)0.772000:0.02400976)0.825000:0.02497654)0.937000:0.33574374)0.002000:0.07590249,(OK006_E_032_D_2:0.34368968,(OK193_E_029_D_2:0.00000001,(CebrOK016_E_012_Conkunitzin_12:0.00000002,((OK006_E_029_Conkunitzin_12:0.00000002,(OK193_E_027_Conkunitzin_12:0.00000002,SRX1323887_E_028_Conkunitzin_12:0.00000002)0.000000:0.00000002)0.000000:0.00000002,(OK212_J_032_Conkunitzin_12:0.00000002,(SRX1323887_E_025_Conkunitzin_7:0.00000002,((OK005_J_021_Conkunitzin_7:0.00000002,(OK214_J_022_Conkunitzin_7:0.00000002,OK212_J_027_Conkunitzin_7:0.00000002)0.000000:0.00000002)0.828000:0.06735329,(CebrOK014_E_008_Conkunitzin_7:0.00000002,CebrOK035_J_032_Conkunitzin_7:0.00000002)0.000000:0.00000001)0.736000:0.06613583)1.000000:1.49541213)0.707000:0.05819635)0.732000:0.05914606)1.000000:1.81730457)0.000000:0.00000001)0.831000:0.20253634)0.937000:0.58415400,(OK212_J_134_N_1:0.17868525,(SRX1323887_E_088_N_1:0.02964403,OK213_E_135_N_1:0.00409736)0.964000:0.32446960)0.834000:0.25251384)0.827000:0.23893020,(((OK005_J_262_Cver05:0.00000002,OK005_J_263_Cver05:0.00000002)0.992000:1.07053180,(((((OK212_J_207_V_1a:0.04461621,OK212_J_206_V_1a:0.00000002)0.886000:0.08081313,(SRX1323887_E_168_V_1a:0.03940117,((OK213_E_029_Conkunitzin_9:0.00000002,OK213_E_030_Conkunitzin_9:0.00000002)0.766000:0.10223520,((OK193_E_026_Conkunitzin_9:0.00000002,(SRX1323887_E_026_Conkunitzin_9:0.00000002,(OK212_J_029_Conkunitzin_9:0.00000002,OK214_J_026_Conkunitzin_9:0.00000002)0.000000:0.00000002)0.000000:0.00000002)0.000000:0.00000002,OK006_E_028_Conkunitzin_9:0.00000002)0.000000:0.00706071)1.000000:1.03089624)0.743000:0.04201346)0.000000:0.02537598,(CebrOK035_J_255_V_1a:0.00000002,CebrOK035_J_256_V_1a:0.00000002)0.682000:0.03508367)0.990000:1.11354053,(OK214_J_218_V_4:0.00000001,(SRX1323887_E_169_V_4:0.00000002,OK213_E_225_V_4:0.00000002)0.000000:0.00000001)0.717000:0.11364935)0.841000:0.23915912,(((OK212_J_262_Pmag01:0.10825713,SRX1323887_E_197_Pmag01:0.12856671)0.056000:0.64918960,(SRX1323887_E_021_Con_ikot_ikot_2:0.82432236,((((CebrOK033_J_218_Pmag02:0.00000002,(CebrOK035_J_306_Pmag02:0.00000002,(OK005_J_275_Pmag02:0.00000002,(OK006_E_237_Pmag02:0.00000002,(OK193_E_218_Pmag02:0.00000002,(OK212_J_263_Pmag02:0.00000002,(OK213_E_260_Pmag02:0.00000002,(OK213_E_262_Pmag02:0.00000002,(OK214_J_272_Pmag02:0.00000002,OK214_J_269_Pmag02:0.00000002)0.000000:0.00000002)0.000000:0.00000002)0.000000:0.00000002)0.000000:0.00000002)0.000000:0.00000002)0.000000:0.00000002)0.000000:0.00000002)0.000000:0.00000002)0.823000:0.10469802,(SRX1323887_E_201_Pmag02:0.00000002,SRX1323887_E_203_Pmag02:0.00000002)0.000000:0.00000002)0.923000:0.21910879,(((SRX1323887_E_199_Pmag02:0.00000002,OK193_E_220_Pmag02:0.00000002)0.000000:0.00000002,(OK005_J_276_Pmag02:0.00000002,(OK005_J_277_Pmag02:0.00000002,(OK005_J_278_Pmag02:0.00000002,(SRX1323887_E_198_Pmag02:0.00000002,SRX1323887_E_202_Pmag02:0.00000002)0.000000:0.00000002)0.000000:0.00000002)0.000000:0.00000002)0.912000:0.11059110)0.000000:0.00000002,(CebrOK035_J_309_Pmag02:0.00000002,(CebrOK035_J_310_Pmag02:0.00000002,OK212_J_265_Pmag02:0.00000002)0.000000:0.00000002)0.924000:0.10987881)0.000000:0.00000002)0.840000:0.10999712,(CebrOK014_E_123_Pmag02:0.00000002,(CebrOK016_E_134_Pmag02:0.00000002,(CebrOK033_J_219_Pmag02:0.00000002,(OK006_E_238_Pmag02:0.00000002,(OK193_E_219_Pmag02:0.00000002,(OK212_J_264_Pmag02:0.00000002,(OK213_E_261_Pmag02:0.00000002,(OK213_E_263_Pmag02:0.00000002,(OK213_E_264_Pmag02:0.00000002,(OK213_E_265_Pmag02:0.00000002,(OK214_J_270_Pmag02:0.00000002,(SRX1323887_E_200_Pmag02:0.00000002,OK214_J_271_Pmag02:0.00000002)0.000000:0.00000002)0.000000:0.00000002)0.000000:0.00000002)0.000000:0.00000002)0.000000:0.00000002)0.000000:0.00000002)0.000000:0.00000002)0.000000:0.00000002)0.000000:0.00000002)0.000000:0.00000002)0.000000:0.00000002)0.000000:0.00000002)0.787000:0.51551776)0.830000:0.74650956)0.857000:0.75530228,(SRX1323887_E_185_Cver01:0.19031557,(CebrOK035_J_289_Cver01:0.00000000,(OK193_E_205_Cver01:0.00000002,(CebrOK033_J_205_Cver01:0.00000002,(CebrOK035_J_290_Cver01:0.00000002,(OK005_J_259_Cver01:0.00000002,(OK212_J_247_Cver01:0.00000002,OK214_J_253_Cver01:0.00000002)0.000000:0.00000002)0.000000:0.00000002)0.000000:0.00000002)0.953000:0.11893371)0.952000:0.11455875)0.646000:0.06400237)0.830000:0.84147808)0.865000:0.66657674)0.000000:0.00000002)0.854000:0.21893739,(((((((OK214_J_260_Ggeo01:0.00000002,(OK212_J_256_Ggeo01:0.00000002,(OK212_J_255_Ggeo01:0.00000002,(OK212_J_254_Ggeo01:0.00000002,(OK212_J_253_Ggeo01:0.00000002,(OK005_J_269_Ggeo01:0.00000002,(OK005_J_268_Ggeo01:0.00000002,(OK005_J_267_Ggeo01:0.00000002,(CebrOK035_J_297_Ggeo01:0.00000002,(CebrOK035_J_296_Ggeo01:0.00000002,(CebrOK035_J_295_Ggeo01:0.00000002,(CebrOK033_J_210_Ggeo01:0.00000002,CebrOK033_J_209_Ggeo01:0.00000002)0.000000:0.00000002)0.000000:0.00000002)0.000000:0.00000002)0.000000:0.00000002)0.000000:0.00000002)0.000000:0.00000002)0.000000:0.00000002)0.000000:0.00000002)0.000000:0.00000002)0.000000:0.00000002)0.000000:0.00000002)0.000000:0.00000001,((CebrOK016_E_132_Ggeo01:0.00000002,(OK006_E_229_Ggeo01:0.00000002,(OK193_E_213_Ggeo01:0.00000002,(OK213_E_253_Ggeo01:0.00000002,(SRX1323887_E_193_Ggeo01:0.00000002,((CebrOK035_J_294_Ggeo01:0.00000002,(OK005_J_265_Ggeo01:0.00000002,(OK006_E_228_Ggeo01:0.00000002,(OK193_E_212_Ggeo01:0.00000002,(OK212_J_252_Ggeo01:0.00000002,(OK213_E_252_Ggeo01:0.00000002,(OK214_J_259_Ggeo01:0.00000002,(SRX1323887_E_192_Ggeo01:0.00000002,((OK214_J_020_Conkunitzin_3:0.00000002,(OK006_E_023_Conkunitzin_3:0.00000002,((SRX1323887_E_024_Conkunitzin_3:0.00000002,OK193_E_024_Conkunitzin_3:0.06361210)0.862000:0.06241944,(OK212_J_025_Conkunitzin_3:0.06318645,(CebrOK033_J_019_Conkunitzin_3:0.00000002,(OK005_J_020_Conkunitzin_3:0.00000002,(OK212_J_026_Conkunitzin_3:0.00000002,OK213_E_026_Conkunitzin_3:0.00000002)0.000000:0.00000002)0.000000:0.00000002)0.000000:0.00000002)0.000000:0.00000002)0.833000:0.06183282)0.000000:0.00000002)1.000000:2.48011504,(CebrOK016_E_131_Ggeo01:0.00000002,CebrOK014_E_121_Ggeo01:0.00000002)0.000000:0.00000002)0.859000:0.16995122)0.000000:0.00000002)0.000000:0.00000002)0.000000:0.00000002)0.000000:0.00000002)0.000000:0.00000002)0.000000:0.00000002)0.000000:0.00000002)0.000000:0.00000002,(((CebrOK033_J_150_P_1a:0.00000002,(((CebrOK035_J_214_P_1a:0.20721689,((OK213_E_198_P_1a:0.00000002,SRX1323887_E_136_P_1a:0.00000002)0.000000:0.00132222,(OK006_E_177_P_1a:0.00000002,OK193_E_161_P_1a:0.00000002)0.000000:0.01650681)0.980000:0.21961524)0.146000:0.06259594,((OK212_J_187_P_1b:0.53822473,(CebrOK035_J_215_P_2:0.02216146,(CebrOK016_E_106_P_2:0.00000002,(OK005_J_182_P_2:0.00000002,(OK193_E_163_P_2:0.00000002,(OK213_E_201_P_2:0.00000002,SRX1323887_E_139_P_2:0.00000002)0.000000:0.00000002)0.000000:0.00000002)0.000000:0.00000002)0.831000:0.07065109)0.399000:0.12775768)0.969000:0.47337615,(CebrOK016_E_105_P_1a:0.00000002,CebrOK014_E_092_P_1a:0.01683035)0.190000:0.11856005)0.246000:0.05363877)0.606000:0.02266225,((CebrOK033_J_149_P_1a:0.00000002,(CebrOK035_J_209_P_1a:0.00000002,(CebrOK035_J_210_P_1a:0.00000002,(OK006_E_180_P_1a:0.00000002,(OK212_J_184_P_1a:0.00000002,OK214_J_188_P_1a:0.00000002)0.000000:0.00000002)0.000000:0.00000002)0.000000:0.00000002)0.000000:0.00000002)0.000000:0.00000002,(CebrOK035_J_212_P_1a:0.00000002,((OK212_J_186_P_1a:0.01705270,(CebrOK033_J_151_P_1a:0.00000002,(CebrOK035_J_211_P_1a:0.00000002,(OK005_J_181_P_1a:0.00000002,(OK212_J_185_P_1a:0.00000002,OK214_J_189_P_1a:0.00000002)0.000000:0.00000002)0.000000:0.00000002)0.000000:0.00000002)0.000000:0.00000002)0.787000:0.02600799,(OK193_E_162_P_1a:0.00000002,(OK006_E_178_P_1a:0.00000002,(OK006_E_179_P_1a:0.00000002,(SRX1323887_E_137_P_1a:0.00000002,OK213_E_199_P_1a:0.00000002)0.000000:0.00000002)0.000000:0.00000002)0.845000:0.02432607)0.763000:0.02510507)0.814000:0.02573987)0.951000:0.05241866)0.847000:0.01709614)0.000000:0.00000002)0.946000:1.99046213,((OK214_J_197_S_1b:0.00000002,OK005_J_188_S_1b:0.00000002)0.000000:0.00000002,(((OK193_E_169_S_1a:0.12671254,(CebrOK033_J_156_S_1a:0.00000002,OK005_J_187_S_1a:0.00000002)0.861000:0.14535917)0.998000:0.51179218,CebrOK035_J_222_S_1a:0.00000002)0.000000:0.00000001,(((CebrOK033_J_027_E_1:0.00000002,(SRX1323887_E_033_E_1:0.18708129,OK193_E_030_E_1:0.00000002)0.834000:0.05788536)0.000000:0.00000002,(CebrOK035_J_038_E_1:0.00000002,(OK005_J_028_E_1:0.00000002,(OK006_E_033_E_1:0.00000002,(OK212_J_038_E_1:0.00000002,(OK213_E_036_E_1:0.00000002,OK214_J_034_E_1:0.00000002)0.000000:0.00000002)0.000000:0.00000002)0.000000:0.00000002)0.000000:0.00000002)0.000000:0.00000002)0.773000:0.06684426,(OK193_E_032_E_2:0.00000002,(OK212_J_039_E_2:0.08712413,(OK005_J_029_E_2:0.00000002,(OK005_J_030_E_2:0.00000002,(OK213_E_037_E_2:0.00000002,(OK213_E_038_E_2:0.00000002,SRX1323887_E_034_E_2:0.00000002)0.000000:0.00000002)0.000000:0.00000002)0.000000:0.00000002)0.000000:0.00000002)0.000000:0.00000002)0.639000:0.05231615)0.984000:0.80442297)0.000000:0.00000001)0.822000:1.44498348)0.797000:0.82746898,CebrOK033_J_207_Ggeo01:0.00000001)0.000000:0.00000001)0.939000:0.14419516)0.000000:0.00000002)0.000000:0.00000002)0.000000:0.00000002)0.000000:0.00000002)0.931000:0.05543130,(OK214_J_261_Ggeo01:0.00000002,((CebrOK035_J_301_Ggeo01:0.07713498,(CebrOK033_J_215_Ggeo01:0.00000002,(CebrOK035_J_300_Ggeo01:0.00000002,(OK005_J_273_Ggeo01:0.00000002,(OK212_J_259_Ggeo01:0.00000002,(OK213_E_256_Ggeo01:0.00000002,(OK214_J_265_Ggeo01:0.00000002,(OK006_E_232_Ggeo01:0.00000002,(SRX1323887_E_195_Ggeo01:0.00000002,OK193_E_215_Ggeo01:0.00000002)0.000000:0.00000002)0.924000:0.05983799)0.000000:0.00000002)0.000000:0.00000002)0.000000:0.00000002)0.000000:0.00000002)0.000000:0.00000002)0.959000:0.18454405)0.000000:0.00000002,((CebrOK033_J_214_Ggeo01:0.00000002,(CebrOK035_J_299_Ggeo01:0.00000002,(OK214_J_263_Ggeo01:0.00000002,OK005_J_272_Ggeo01:0.00000002)0.000000:0.00000002)0.000000:0.00000002)0.806000:0.09756811,((OK214_J_264_Ggeo01:0.17045519,(CebrOK033_J_212_Ggeo01:0.00000002,((CebrOK033_J_213_Ggeo01:0.00000002,(CebrOK035_J_298_Ggeo01:0.00000002,(OK005_J_271_Ggeo01:0.00000002,(OK214_J_262_Ggeo01:0.00000002,OK212_J_257_Ggeo01:0.00000002)0.000000:0.00000002)0.000000:0.00000002)0.000000:0.00000002)0.000000:0.00000002,(CebrOK014_E_119_Ggeo01:0.00000002,((CebrOK016_E_130_Ggeo01:0.00000002,(OK005_J_264_Ggeo01:0.00000002,(OK006_E_227_Ggeo01:0.00000002,(OK193_E_209_Ggeo01:0.00000002,(OK193_E_210_Ggeo01:0.00000002,(OK193_E_211_Ggeo01:0.00000002,(OK213_E_251_Ggeo01:0.00000002,(SRX1323887_E_190_Ggeo01:0.00000002,SRX1323887_E_191_Ggeo01:0.00000002)0.000000:0.00000002)0.000000:0.00000002)0.000000:0.00000002)0.000000:0.00000002)0.000000:0.00000002)0.000000:0.00000002)0.000000:0.00000002)0.000000:0.00000002,((CebrOK033_J_211_Ggeo01:0.00000002,OK005_J_270_Ggeo01:0.00000002)0.762000:0.07860981,(OK193_E_214_Ggeo01:0.00000002,OK006_E_230_Ggeo01:0.00000002)0.782000:0.08141443)0.883000:0.16114505)0.000000:0.00000002)0.919000:0.07504559)0.000000:0.00000002)0.846000:0.11980717)0.759000:0.07126015,(OK212_J_258_Ggeo01:0.00000001,(SRX1323887_E_194_Ggeo01:0.00000002,OK213_E_255_Ggeo01:0.00000002)0.000000:0.00000002)0.832000:0.13787612)0.846000:0.08375321)0.772000:0.05214026)0.955000:0.25397440)0.000000:0.00000002)0.000000:0.00000001)0.999000:1.19745263,((CebrOK014_E_126_SF-mi1:0.00000002,(OK006_E_241_SF-mi1:0.00000002,(((((OK193_E_226_SF-mi1:0.00000002,(OK213_E_271_SF-mi1:0.00000002,SRX1323887_E_209_SF-mi1:0.00000002)0.000000:0.00000002)0.000000:0.00000002,(OK006_E_243_SF-mi1:0.00000002,SRX1323887_E_210_SF-mi1:0.00000002)0.839000:0.02765954)0.793000:0.02751354,(CebrOK033_J_225_SF-mi1:0.00000002,(CebrOK035_J_321_SF-mi1:0.00000002,(OK005_J_282_SF-mi1:0.00000002,(OK214_J_281_SF-mi1:0.00000002,OK212_J_269_SF-mi1:0.00000002)0.000000:0.00000002)0.000000:0.00000002)0.000000:0.00000002)0.791000:0.02829661)0.949000:0.11783244,(SRX1323887_E_207_SF-mi1:0.02677432,(SRX1323887_E_208_SF-mi1:0.02669836,(CebrOK033_J_223_SF-mi1:0.00000002,(CebrOK033_J_224_SF-mi1:0.00000002,(CebrOK035_J_319_SF-mi1:0.00000002,(CebrOK035_J_320_SF-mi1:0.00000002,(OK005_J_280_SF-mi1:0.00000002,(OK005_J_281_SF-mi1:0.00000002,(OK212_J_268_SF-mi1:0.00000002,(OK214_J_279_SF-mi1:0.00000002,OK214_J_280_SF-mi1:0.00000002)0.000000:0.00000002)0.000000:0.00000002)0.000000:0.00000002)0.000000:0.00000002)0.000000:0.00000002)0.000000:0.00000002)0.000000:0.00000002)0.000000:0.00000002)0.000000:0.00000002)0.000000:0.00000002)0.814000:0.03445915,OK213_E_270_SF-mi1:0.00000002)0.000000:0.00000002)0.814000:0.03407542)1.000000:1.33895130,((((CebrOK035_J_116_M_9:0.06385312,CebrOK035_J_117_M_9:0.18156968)0.956000:0.78645300,((OK193_E_113_M_3b_WF:0.00000002,(OK193_E_112_M_3b_WF:0.00000002,(OK005_J_105_M_3b_WF:0.00000002,(CebrOK016_E_061_M_3b_WF:0.00000002,OK005_J_103_M_3b_WF:0.00000002)0.000000:0.00000002)0.000000:0.00000002)0.000000:0.00000002)0.822000:0.08878777,(OK193_E_114_M_3b_WF:0.09036154,(OK006_E_114_M_3b_WF:0.08934160,(SRX1323887_E_086_M_3b_WF:0.00000002,(OK214_J_112_M_3b_WF:0.00000002,(OK214_J_114_M_3b_WF:0.00000002,(SRX1323887_E_085_M_3b_WF:0.00000002,(OK214_J_113_M_3b_WF:0.00000002,(CebrOK033_J_085_M_3b_WF:0.00000002,(CebrOK035_J_114_M_3b_WF:0.00000002,(OK005_J_104_M_3b_WF:0.00000002,(OK006_E_109_M_3b_WF:0.00000002,(OK006_E_110_M_3b_WF:0.00000002,(OK006_E_111_M_3b_WF:0.00000002,(OK006_E_112_M_3b_WF:0.00000002,(OK006_E_113_M_3b_WF:0.00000002,(OK212_J_130_M_3b_WF:0.00000002,(OK212_J_131_M_3b_WF:0.00000002,(OK212_J_132_M_3b_WF:0.00000002,(OK213_E_129_M_3b_WF:0.00000002,(OK213_E_131_M_3b_WF:0.00000002,OK213_E_130_M_3b_WF:0.00000002)0.000000:0.00000002)0.000000:0.00000002)0.000000:0.00000002)0.000000:0.00000002)0.000000:0.00000002)0.000000:0.00000002)0.000000:0.00000002)0.000000:0.00000002)0.000000:0.00000002)0.000000:0.00000002)0.000000:0.00000002)0.000000:0.00000002)0.000000:0.00000002)0.000000:0.00000002)0.000000:0.00000002)0.000000:0.00000002)0.000000:0.00000002)0.000000:0.00000002)0.000000:0.00000001)0.000000:0.00000002)0.756000:0.09020349)0.000000:0.00000002,((((OK005_J_094_M_3a:0.00000002,(OK005_J_095_M_3a:0.00000002,OK005_J_096_M_3a:0.02031801)0.931000:0.04093430)0.930000:0.04110330,(OK214_J_102_M_3a:0.06249018,(OK214_J_103_M_3a:0.00000002,(OK213_E_112_M_3a:0.00000002,((SRX1323887_E_071_M_3a:0.00000002,OK193_E_092_M_3a:0.01961220)0.827000:0.01984349,(SRX1323887_E_072_M_3a:0.00000002,OK193_E_096_M_3a:0.02107754)0.952000:0.06548988)0.000000:0.00000002)0.931000:0.02002299)0.000000:0.00000002)0.000000:0.00000002)0.790000:0.01995781,(OK005_J_093_M_3a:0.01688727,(OK213_E_116_M_3a:0.06459352,(OK213_E_113_M_3a:0.00000002,(OK213_E_115_M_3a:0.02058162,(OK213_E_114_M_3a:0.00000002,((OK193_E_093_M_3a:0.06319177,OK193_E_094_M_3a:0.00000002)0.918000:0.04063906,(OK006_E_097_M_3a:0.00000002,(OK006_E_096_M_3a:0.00000002,OK005_J_097_M_3a:0.06515008)0.906000:0.04130985)0.000000:0.00000002)0.987000:0.10348234)0.000000:0.00000002)0.920000:0.06330255)0.937000:0.08631522)0.918000:0.06645916)0.865000:0.04247869)0.751000:0.02016422,((((OK193_E_080_M_3a:0.00000002,(OK006_E_090_M_3a:0.00000002,(OK213_E_104_M_3a:0.00000002,OK193_E_079_M_3a:0.00000002)0.000000:0.00000002)0.000000:0.00000002)0.991000:0.21215135,((((CebrOK033_J_083_M_3a_WF:0.00000002,(CebrOK035_J_111_M_3a_WF:0.03350048,(OK005_J_101_M_3a_WF:0.01684160,(OK005_J_100_M_3a_WF:0.01705297,OK214_J_109_M_3a_WF:0.03418463)0.749000:0.01640984)0.000000:0.00000002)0.798000:0.01671528)0.970000:0.11729304,(((CebrOK016_E_045_M_3a:0.00000002,CebrOK014_E_040_M_3a:0.00000002)0.000000:0.00000002,(CebrOK014_E_039_M_3a:0.05551237,OK005_J_079_M_3a:0.03719747)0.757000:0.01693353)0.928000:0.05663764,((OK005_J_080_M_3a:0.00000002,(OK005_J_081_M_3a:0.01821852,OK005_J_082_M_3a:0.03840362)0.760000:0.01824335)0.914000:0.04083097,(CebrOK016_E_046_M_3a:0.00000002,(OK212_J_094_M_3a:0.00000002,(OK214_J_086_M_3a:0.00000002,(OK213_E_098_M_3a:0.00000002,OK005_J_083_M_3a:0.05532325)0.828000:0.01802840)0.000000:0.00000002)0.967000:0.11559469)0.000000:0.00000002)0.000000:0.00000002)0.425000:0.02093786)0.465000:0.01923419,((OK006_E_095_M_3a:0.00000002,((CebrOK033_J_079_M_3a:0.00000002,(OK214_J_101_M_3a:0.00000002,(CebrOK035_J_103_M_3a:0.01853626,OK212_J_119_M_3a:0.01850034)0.000000:0.00000002)0.000000:0.00000002)0.000000:0.00000002,(OK213_E_111_M_3a:0.03772465,OK193_E_090_M_3a:0.00000002)0.953000:0.05734523)0.851000:0.03729101)0.999000:0.37001033,(OK212_J_118_M_3a:0.00000001,(OK214_J_100_M_3a:0.00000002,OK006_E_094_M_3a:0.00000002)0.000000:0.00000001)0.990000:0.26991881)0.690000:0.01580142)0.828000:0.03364594,(((((((OK005_J_098_M_3a_WF:0.05305682,((OK213_E_120_M_3a_WF:0.00000002,(OK193_E_105_M_3a_WF:0.00000002,((OK193_E_100_M_3a_WF:0.00000002,OK193_E_101_M_3a_WF:0.00000002)0.758000:0.02678449,(OK213_E_121_M_3a_WF:0.00000002,(OK006_E_099_M_3a_WF:0.00000002,((OK006_E_103_M_3a_WF:0.00000002,(OK213_E_118_M_3a_WF:0.08141580,((CebrOK014_E_050_M_3a_WF:0.00000002,(CebrOK014_E_052_M_3a_WF:0.00000002,(CebrOK016_E_055_M_3a_WF:0.00000002,(CebrOK016_E_057_M_3a_WF:0.00000002,(CebrOK014_E_051_M_3a_WF:0.00000002,CebrOK016_E_054_M_3a_WF:0.00000002)0.000000:0.00000002)0.000000:0.00000002)0.000000:0.00000002)0.000000:0.00000002)0.917000:0.05087318,OK193_E_102_M_3a_WF:0.00000002)0.000000:0.00000002)0.000000:0.00000002)0.000000:0.00000001,OK006_E_104_M_3a_WF:0.11274435)0.000000:0.00000001)0.000000:0.00000002)0.788000:0.01662816)0.965000:0.06858192)0.000000:0.00000002)0.979000:0.06817065,((OK213_E_119_M_3a_WF:0.01733426,(CebrOK016_E_058_M_3a_WF:0.00000002,CebrOK014_E_053_M_3a_WF:0.01734980)0.859000:0.01725917)0.000000:0.00000002,OK213_E_123_M_3a_WF:0.15140843)0.000000:0.00000002)0.942000:0.05139627)0.000000:0.00000002,(CebrOK014_E_054_M_3a_WF:0.01735115,OK193_E_104_M_3a_WF:0.03496125)0.000000:0.00000002)0.913000:0.07364016,(((OK213_E_126_M_3a_WF:0.05546061,CebrOK014_E_055_M_3a_WF:0.02771296)0.000000:0.00000002,(SRX1323887_E_081_M_3a_WF:0.00000002,(SRX1323887_E_079_M_3a_WF:0.00000002,(SRX1323887_E_080_M_3a_WF:0.00000002,((CebrOK016_E_059_M_3a_WF:0.00000002,(OK193_E_107_M_3a_WF:0.00000002,OK213_E_127_M_3a_WF:0.00000002)0.920000:0.05530512)0.829000:0.03540424,((SRX1323887_E_083_M_3a_WF:0.00150410,SRX1323887_E_066_M_3a:0.02700318)0.000000:0.01644454,SRX1323887_E_082_M_3a_WF:0.00000002)0.000000:0.00000002)0.000000:0.00000002)0.000000:0.00000002)0.833000:0.01794147)0.816000:0.02090109)0.960000:0.06356169,((OK193_E_067_M_3a:0.02747738,CebrOK016_E_039_M_3a:0.00000002)0.850000:0.02755629,CebrOK016_E_040_M_3a:0.00000002)0.000000:0.00000002)0.627000:0.01127847)0.889000:0.06071609,(CebrOK035_J_104_M_3a:0.36692751,(((CebrOK033_J_070_M_3a:0.00000002,CebrOK033_J_068_M_3a:0.02025993)0.000000:0.00000002,(OK212_J_092_M_3a:0.00000002,(OK212_J_090_M_3a:0.00000002,(OK212_J_089_M_3a:0.00000002,OK212_J_096_M_3a:0.00000002)0.000000:0.00000003)0.000000:0.06024852)0.956000:0.05896396)0.000000:0.00000002,((OK214_J_108_M_3a_WF:0.10998066,(OK214_J_080_M_3a:0.00000002,(OK214_J_106_M_3a_WF:0.00000002,(OK214_J_081_M_3a:0.00000002,CebrOK035_J_082_M_3a:0.00000002)0.932000:0.02001754)0.000000:0.00000002)0.000000:0.00000002)0.824000:0.02007583,((CebrOK033_J_069_M_3a:0.00000002,CebrOK033_J_074_M_3a:0.00000002)0.000000:0.00000002,(OK213_E_103_M_3a:0.03621435,(OK213_E_106_M_3a:0.00000002,(OK213_E_107_M_3a:0.00000001,((OK006_E_038_F_1:0.00000002,(OK213_E_040_F_1:0.00000002,(OK214_J_037_F_1:0.00000002,(SRX1323887_E_035_F_1:0.00000002,(SRX1323887_E_036_F_1:0.00000002,(CebrOK033_J_028_F_1:0.00000002,(CebrOK035_J_039_F_1:0.00000002,(OK005_J_032_F_1:0.00000002,(OK212_J_040_F_1:0.00000002,OK214_J_036_F_1:0.00000002)0.000000:0.00000002)0.000000:0.00000002)0.000000:0.00000002)0.000000:0.00000002)0.000000:0.00000002)0.000000:0.00000002)0.000000:0.00000002)0.000000:0.00000002)0.000000:0.00000001,(OK005_J_033_F_1:0.00000002,(CebrOK016_E_013_F_1:0.00000002,(CebrOK014_E_011_F_1:0.00000002,((OK006_E_036_F_1:0.00000002,(OK193_E_033_F_1:0.00000002,(OK193_E_034_F_1:0.00000002,(OK006_E_035_F_1:0.00000002,OK006_E_034_F_1:0.00000002)0.000000:0.00000002)0.000000:0.00000002)0.000000:0.00000002)0.850000:0.02400008,(CebrOK014_E_010_F_1:0.00000002,(((OK006_E_048_F_2:0.00000002,OK006_E_049_F_2:0.00000002)0.000000:0.00000001,(OK006_E_047_F_2:0.00000002,OK006_E_051_F_2:0.00000002)0.000000:0.00000001)0.974000:0.30344939,(((OK212_J_043_F_2:0.00000002,OK006_E_044_F_2:0.00000002)0.000000:0.00000001,(OK006_E_042_F_2:0.00000002,OK006_E_041_F_2:0.00000002)0.000000:0.00000001)0.000000:0.00000002,((OK212_J_044_F_2:0.00000002,(OK212_J_045_F_2:0.00000002,(OK212_J_046_F_2:0.00000002,OK212_J_047_F_2:0.00000002)0.000000:0.00000002)0.000000:0.00000002)0.766000:0.07009809,(OK212_J_042_F_2:0.00000002,OK006_E_043_F_2:0.00000002)0.000000:0.05094568)0.000000:0.05418369)0.716000:0.05662500)0.848000:0.31893503)0.000000:0.00000002)0.000000:0.00000002)0.000000:0.00000002)0.000000:0.00000002)0.000000:0.00000001)1.000000:2.53724412)0.000000:0.00000001)0.773000:0.03871065)0.911000:0.07644701)0.831000:0.02035705)0.000000:0.00000002)0.000000:0.05956971)0.000000:0.00000003)0.000000:0.00000001,((OK214_J_107_M_3a_WF:0.02710132,(CebrOK033_J_073_M_3a:0.00000002,CebrOK033_J_072_M_3a:0.00000002)0.000000:0.00000002)0.798000:0.01915917,(CebrOK033_J_071_M_3a:0.00000002,(OK005_J_076_M_3a:0.00000002,(OK005_J_074_M_3a:0.05345605,((OK213_E_096_M_3a:0.01890553,(OK213_E_088_M_3a:0.00000003,(SRX1323887_E_059_M_3a:0.02670166,CebrOK014_E_034_M_3a:0.00000002)0.873000:0.05413674)0.000000:0.06403834)0.779000:0.01868462,((OK005_J_075_M_3a:0.00000002,OK005_J_090_M_3a:0.02778374)0.742000:0.02653623,(OK214_J_098_M_3a:0.00000002,OK214_J_085_M_3a:0.00000002)0.000000:0.00000002)0.000000:0.00000002)0.000000:0.00000002)0.833000:0.01903490)0.595000:0.03811324)0.777000:0.01943453)0.904000:0.03836143)0.000000:0.00000001,((OK213_E_100_M_3a:0.07548789,((OK213_E_099_M_3a:0.07636762,(CebrOK016_E_041_M_3a:0.00000002,CebrOK014_E_035_M_3a:0.01948896)0.000000:0.00000002)0.957000:0.09640515,((SRX1323887_E_060_M_3a:0.00000002,(SRX1323887_E_061_M_3a:0.00000002,((SRX1323887_E_067_M_3a:0.00000002,SRX1323887_E_068_M_3a:0.05486045)0.865000:0.03689631,(OK006_E_089_M_3a:0.01819367,((OK006_E_088_M_3a:0.00000002,(SRX1323887_E_065_M_3a:0.00000002,(SRX1323887_E_064_M_3a:0.00000002,(CebrOK016_E_047_M_3a:0.01874752,(CebrOK014_E_043_M_3a:0.09396894,CebrOK014_E_044_M_3a:0.00000002)0.781000:0.01863319)0.972000:0.07554470)0.922000:0.05573117)0.870000:0.03658681)0.955000:0.09292839,OK213_E_101_M_3a:0.11743954)0.000000:0.00000002)0.764000:0.01880071)0.960000:0.07747331)0.949000:0.05855119)0.947000:0.05881442,(CebrOK014_E_036_M_3a:0.03959877,CebrOK016_E_042_M_3a:0.00000002)0.000000:0.00000002)0.766000:0.01828556)0.775000:0.01992456)0.000000:0.00000002,(((CebrOK016_E_049_M_3a:0.00000002,SRX1323887_E_070_M_3a:0.28765757)0.926000:0.08659310,((((SRX1323887_E_063_M_3a:0.01962944,CebrOK014_E_038_M_3a:0.00000002)0.000000:0.00000002,((OK006_E_082_M_3a:0.00000002,(OK006_E_083_M_3a:0.01021568,OK006_E_080_M_3a:0.08133828)0.000000:0.02969619)0.704000:0.06057653,((CebrOK014_E_037_M_3a:0.00000002,(OK193_E_068_M_3a:0.00000002,SRX1323887_E_062_M_3a:0.01962612)0.000000:0.00000002)0.000000:0.00000002,(OK005_J_077_M_3a:0.00000002,(CebrOK033_J_075_M_3a:0.00000003,(OK005_J_088_M_3a:0.00000002,OK005_J_089_M_3a:0.00000002)0.775000:0.02788250)0.000000:0.02035855)0.932000:0.06101717)0.000000:0.00000002)0.956000:0.06066322)0.944000:0.05987279,(OK193_E_070_M_3a:0.00000002,CebrOK016_E_044_M_3a:0.00000002)0.000000:0.00000002)0.000000:0.00000001,((OK213_E_093_M_3a:0.00000002,((OK213_E_089_M_3a:0.00000001,OK213_E_124_M_3a_WF:0.05403052)0.831000:0.06055257,((OK212_J_113_M_3a:0.05619275,(OK214_J_095_M_3a:0.17624577,(OK212_J_115_M_3a:0.11572602,(((OK214_J_093_M_3a:0.08498327,OK214_J_097_M_3a:0.08521494)0.000000:0.00000002,(OK214_J_091_M_3a:0.00000002,(CebrOK035_J_096_M_3a:0.00000002,(OK006_E_092_M_3a:0.00000002,(CebrOK035_J_095_M_3a:0.00000002,OK006_E_093_M_3a:0.00000002)0.000000:0.00000002)0.000000:0.00000002)0.000000:0.00000002)0.000000:0.00000002)0.000000:0.00000002,OK214_J_092_M_3a:0.02787374)0.000000:0.00000002)0.000000:0.00000001)0.000000:0.00000000)0.000000:0.00000000,(OK212_J_114_M_3a:0.02721928,(OK212_J_112_M_3a:0.02777844,OK212_J_111_M_3a:0.00000002)0.690000:0.02798665)0.792000:0.02825406)0.786000:0.02790805)0.000000:0.00000002)0.857000:0.01960189,((OK213_E_091_M_3a:0.04100261,(OK193_E_109_M_3a_WF:0.19761940,OK193_E_071_M_3a:0.00000002)0.000000:0.00000002)0.898000:0.04013986,(OK212_J_106_M_3a:0.02819223,((OK193_E_069_M_3a:0.00000002,((CebrOK035_J_089_M_3a:0.08207906,(((OK005_J_073_M_3a:0.00000002,OK006_E_085_M_3a:0.03453739)0.912000:0.07089562,(OK193_E_064_M_3a:0.12669636,OK193_E_066_M_3a:0.05455407)0.000000:0.00000002)0.000000:0.00809826,(OK212_J_087_M_3a:0.05576773,OK213_E_086_M_3a:0.00438071)0.000000:0.03616196)0.863000:0.07083041)0.714000:0.02226200,(CebrOK035_J_083_M_3a:0.00000002,((OK212_J_095_M_3a:0.10701584,(OK212_J_088_M_3a:0.00000002,(OK212_J_099_M_3a:0.08426873,OK212_J_091_M_3a:0.00000002)0.000000:0.00000002)0.000000:0.00000002)0.998000:0.19592810,(CebrOK035_J_084_M_3a:0.00000001,(CebrOK016_E_056_M_3a_WF:0.07837660,(((OK214_J_115_M_8:0.00000002,(OK214_J_116_M_8:0.00000002,OK214_J_117_M_8:0.00000002)0.000000:0.00000002)0.000000:0.00000002,(CebrOK014_E_057_M_8:0.00000002,((OK006_E_115_M_8:0.00000001,OK006_E_116_M_8:0.00000002)0.935000:0.01833292,(CebrOK016_E_064_M_8:0.00000002,OK193_E_116_M_8:0.00000002)0.000000:0.00000002)0.000000:0.00000002)0.920000:0.03716873)0.000000:0.00092619,(OK212_J_133_M_8:0.00000002,OK213_E_134_M_8:0.01985485)0.000000:0.01710745)1.000000:1.26835922)0.000000:0.00674116)0.749000:0.02181133)0.710000:0.03919448)0.783000:0.06524320)0.920000:0.06271112)0.940000:0.05892752,(OK213_E_094_M_3a:0.00000002,(OK213_E_090_M_3a:0.00000002,OK213_E_125_M_3a_WF:0.05409046)0.806000:0.06061124)0.824000:0.01972875)0.000000:0.00000002)0.766000:0.01941386)0.784000:0.01953638)0.000000:0.00000001)0.962000:0.08255933)0.000000:0.00715910,(((((CebrOK033_J_081_M_3a_WF:0.00000002,(OK214_J_104_M_3a_WF:0.00000002,OK212_J_123_M_3a_WF:0.01689619)0.000000:0.00000002)0.752000:0.01593038,(OK006_E_098_M_3a_WF:0.00000002,CebrOK014_E_047_M_3a_WF:0.00000002)0.995000:0.16568222)0.743000:0.01906944,(SRX1323887_E_073_M_3a_WF:0.03551056,CebrOK014_E_048_M_3a_WF:0.03302100)0.882000:0.05266828)1.000000:0.48345330,(OK212_J_085_M_3a:0.00000002,(OK212_J_086_M_3a:0.05494768,(OK214_J_094_M_3a:0.02721116,CebrOK035_J_081_M_3a:0.00000002)0.000000:0.00000002)0.733000:0.02742081)0.676000:0.02373777)0.671000:0.03201772,(OK212_J_105_M_3a:0.02784070,((OK212_J_107_M_3a:0.00000002,OK212_J_108_M_3a:0.00000002)0.918000:0.05666469,((OK212_J_101_M_3a:0.16589869,((OK214_J_090_M_3a:0.11566978,OK212_J_102_M_3a:0.00000002)0.821000:0.02768685,((OK212_J_103_M_3a:0.00000002,(CebrOK035_J_080_M_3a:0.00000002,CebrOK033_J_065_M_3a:0.00000002)0.873000:0.01858943)0.745000:0.01859400,OK212_J_109_M_3a:0.05667997)0.000000:0.00000002)0.737000:0.01405166)0.879000:0.04603374,((CebrOK033_J_067_M_3a:0.03644352,CebrOK033_J_066_M_3a:0.00000002)0.842000:0.01876764,(CebrOK033_J_077_M_3a:0.00000002,OK212_J_104_M_3a:0.00000002)0.000000:0.00000002)0.000000:0.00000002)0.000000:0.00000003)0.000000:0.00000003)0.000000:0.04462710)0.375000:0.03109192)0.866000:0.03857431)0.820000:0.01895402)0.791000:0.01924107,(((CebrOK035_J_110_M_3a_WF:0.10240585,(OK212_J_126_M_3a_WF:0.00000002,OK212_J_125_M_3a_WF:0.00000002)0.769000:0.01674556)0.735000:0.05172293,(OK212_J_124_M_3a_WF:0.00000002,CebrOK033_J_082_M_3a_WF:0.01695526)0.000000:0.00000002)0.984000:0.22088517,((CebrOK035_J_090_M_3a:0.02402650,(CebrOK035_J_099_M_3a:0.04368813,SRX1323887_E_069_M_3a:0.18178968)0.883000:0.06751042)0.946000:0.07149150,(CebrOK035_J_085_M_3a:0.05299518,CebrOK035_J_091_M_3a:0.01897062)0.000000:0.00000002)0.943000:0.08927040)0.726000:0.02319466)0.765000:0.01918292)0.000000:0.00000001)0.860000:0.08881392,(OK214_J_087_M_3a:0.09796028,(OK005_J_084_M_3a:0.00757506,OK006_E_087_M_3a:0.06909112)0.765000:0.03746752)0.000000:0.00706091)1.000000:0.49303813,(CebrOK033_J_080_M_3a:0.00000002,(OK193_E_091_M_3a:0.01831970,OK193_E_095_M_3a:0.06590653)0.799000:0.02116713)0.743000:0.02077394)0.754000:0.01888609)0.877000:0.04385368)0.759000:0.02374659,(CebrOK035_J_109_M_3a:0.28110068,((OK006_E_077_M_1:0.06192252,(((OK193_E_052_M_1:0.00000002,OK213_E_076_M_1:0.00000002)0.931000:0.10705104,(OK212_J_081_M_1:0.02059494,(CebrOK033_J_059_M_1:0.00000002,(OK005_J_064_M_1:0.00000002,(OK006_E_076_M_1:0.00000002,(CebrOK035_J_073_M_1:0.00000002,CebrOK035_J_074_M_1:0.00000002)0.901000:0.02072701)0.000000:0.00000002)0.000000:0.00000002)0.000000:0.00000002)0.755000:0.02968834)0.975000:0.16649480,((CebrOK035_J_076_M_1:0.00000002,(OK213_E_078_M_1:0.00000002,OK212_J_082_M_1:0.00000002)0.000000:0.00000002)0.717000:0.02020724,(CebrOK016_E_036_M_1:0.00000002,(CebrOK033_J_060_M_1:0.00000002,(OK214_J_075_M_1:0.00000002,OK213_E_077_M_1:0.00000002)0.000000:0.00000002)0.000000:0.00000002)0.000000:0.00000002)0.000000:0.00000002)0.883000:0.04167970)0.000000:0.00000002,(((CebrOK035_J_078_M_2:0.00000002,CebrOK035_J_079_M_2:0.00000002)0.881000:0.04116147,((OK213_E_083_M_2:0.01995880,(OK005_J_067_M_2:0.00000002,(OK005_J_068_M_2:0.00000002,(OK193_E_058_M_2:0.00000002,OK193_E_057_M_2:0.00000002)0.000000:0.00000002)0.000000:0.00000002)0.865000:0.03939111)0.963000:0.08817356,((SRX1323887_E_057_M_2:0.01961986,((OK005_J_065_M_2:0.00000002,(OK193_E_055_M_2:0.00000002,OK193_E_054_M_2:0.00000002)0.000000:0.00000002)0.920000:0.03904294,((OK213_E_081_M_2:0.00000002,(OK213_E_082_M_2:0.00000002,(OK193_E_056_M_2:0.00000002,OK005_J_066_M_2:0.00000002)0.929000:0.03960557)0.901000:0.03882690)0.972000:0.08973826,(OK213_E_080_M_2:0.00000002,OK213_E_079_M_2:0.00000002)0.000000:0.00000002)0.847000:0.01953133)0.000000:0.00000002)0.836000:0.02013666,(CebrOK033_J_062_M_2:0.14835211,(CebrOK033_J_064_M_2:0.13565530,(OK005_J_063_M_1:0.06279461,(CebrOK033_J_058_M_1:0.02024931,(CebrOK014_E_030_M_1:0.00000002,(CebrOK014_E_031_M_1:0.00000002,CebrOK016_E_035_M_1:0.00000002)0.000000:0.00000002)0.000000:0.00000002)0.919000:0.06895603)0.896000:0.07394802)0.815000:0.06212504)0.919000:0.08618368)0.000000:0.00000002)0.511000:0.01941324)0.861000:0.04013424,(OK005_J_070_M_2:0.27153689,(CebrOK035_J_077_M_2:0.08475787,((OK193_E_060_M_2:0.02173772,OK193_E_059_M_2:0.08234576)0.771000:0.01997249,(OK193_E_061_M_2:0.10987325,(SRX1323887_E_058_M_2:0.11616256,(CebrOK014_E_032_M_2:0.00000002,(CebrOK033_J_063_M_2:0.00000002,CebrOK016_E_037_M_2:0.00000002)0.000000:0.00000002)0.834000:0.04670621)0.000000:0.00000002)0.792000:0.02096080)0.000000:0.00000002)0.714000:0.02278108)0.841000:0.04667075)0.866000:0.04054026)0.000000:0.00000002)0.942000:0.13677724)0.000000:0.00000002)0.756000:0.28568992)0.000000:0.07593180,(CebrOK016_E_060_M_3a_WF:0.00000002,(OK006_E_108_M_3a_WF:0.00000002,(OK193_E_110_M_3a_WF:0.00000002,((OK212_J_129_M_3a_WF:0.00000003,SRX1323887_E_084_M_3a_WF:0.00000002)0.000000:0.02659489,(OK213_E_128_M_3a_WF:0.00000002,(CebrOK033_J_084_M_3a_WF:0.00000002,(CebrOK035_J_112_M_3a_WF:0.00000002,(OK005_J_102_M_3a_WF:0.00000002,OK214_J_111_M_3a_WF:0.00000002)0.000000:0.00000002)0.000000:0.00000002)0.000000:0.00000002)0.000000:0.00000002)0.000000:0.00000002)0.000000:0.00000002)0.000000:0.00000002)0.961000:0.45885246)0.884000:0.24910670,((SRX1323887_E_134_O3_1:0.03091502,((((CebrOK033_J_148_O3_3:0.00000001,(CebrOK035_J_208_O3_3:0.00000002,((CebrOK033_J_147_O3_3:0.00000002,(CebrOK014_E_090_O3_3:0.00000002,(CebrOK016_E_104_O3_3:0.00000002,OK193_E_160_O3_3:0.00000002)0.000000:0.00000002)0.929000:0.02283453)0.000000:0.00000002,(OK213_E_068_I4:0.00000002,(CebrOK035_J_066_I4:0.00000002,OK214_J_069_I4:0.00000002)0.886000:0.28107375)1.000000:2.70864084)0.000000:0.00000002)0.000000:0.00000001)1.000000:1.04335973,((CebrOK033_J_143_O3_1:0.00000002,(CebrOK035_J_201_O3_1:0.00000002,(OK212_J_181_O3_1:0.00000002,(OK214_J_183_O3_1:0.00000002,(OK213_E_194_O3_1:0.00000002,OK006_E_173_O3_1:0.00000002)0.000000:0.00000002)0.000000:0.00000002)0.000000:0.00000002)0.000000:0.00000002)0.000000:0.00000002,((OK213_E_195_O3_2:0.00000002,(CebrOK016_E_103_O3_2:0.00000002,(CebrOK033_J_144_O3_2:0.00000002,(CebrOK035_J_206_O3_2:0.00000002,(OK005_J_179_O3_2:0.00000002,(OK006_E_174_O3_2:0.00000002,(OK193_E_157_O3_2:0.00000002,(SRX1323887_E_135_O3_2:0.00000002,OK212_J_182_O3_2:0.00000002)0.000000:0.00000002)0.000000:0.00000002)0.000000:0.00000002)0.000000:0.00000002)0.000000:0.00000002)0.000000:0.00000002)0.814000:0.03178404)0.882000:0.14817699,(((CebrOK033_J_146_O3_2:0.03836843,OK214_J_187_O3_2:0.00000002)0.000000:0.00000002,(OK193_E_159_O3_2:0.00000002,(OK193_E_158_O3_2:0.00000002,OK213_E_197_O3_2:0.00000002)0.987000:0.15347976)0.782000:0.07716880)0.971000:0.32011058,(OK005_J_180_O3_2:0.00000001,((OK212_J_183_O3_2:0.00000002,(OK214_J_186_O3_2:0.00000002,OK213_E_196_O3_2:0.00000002)0.000000:0.00000002)0.000000:0.00000002,(CebrOK035_J_207_O3_2:0.00000002,CebrOK033_J_145_O3_2:0.00000002)0.000000:0.00000002)0.000000:0.00000001)0.864000:0.14189364)0.842000:0.12025252)0.912000:0.17777228)0.667000:0.02956395)0.000000:0.07331206,(CebrOK035_J_205_O3_1:0.02020607,CebrOK035_J_202_O3_1:0.06606647)0.987000:0.22091940)0.219000:0.02271162,(OK213_E_193_O3_1:0.02398069,OK006_E_172_O3_1:0.00000002)0.884000:0.06242817)0.788000:0.04613891)1.000000:0.89352033,(((((((OK212_J_208_Y_1:0.00317581,OK005_J_211_Y_1:0.07985727)0.000000:0.02359912,((CebrOK035_J_258_Y_1:0.00000002,(OK214_J_220_Y_1:0.00000002,CebrOK035_J_259_Y_1:0.00000002)0.000000:0.00000002)0.000000:0.00000002,(OK214_J_219_Y_1:0.00000002,CebrOK033_J_179_Y_1:0.00000002)0.000000:0.00000002)0.000000:0.00000002)0.798000:0.07474745,(CebrOK014_E_108_Y_1:0.00000002,(CebrOK016_E_120_Y_1:0.00000002,(OK006_E_194_Y_1:0.00000002,(OK193_E_186_Y_1:0.00000002,(SRX1323887_E_170_Y_1:0.00000002,OK213_E_226_Y_1:0.00000002)0.000000:0.00000002)0.000000:0.00000002)0.000000:0.00000002)0.000000:0.00000002)0.827000:0.07535133)0.749000:0.23085099,(OK213_E_283_Virro01:0.00000001,(OK006_E_264_Virro01:0.00000002,CebrOK016_E_141_Virro01:0.00000002)0.000000:0.00000001)0.944000:0.55735143)0.939000:0.87776478,((((OK005_J_174_O2_WF:0.00000002,OK213_E_190_O2_WF:0.01795820)0.898000:0.09776337,(OK005_J_176_O2_WF:0.00000002,(OK005_J_172_O2_WF:0.00000002,((OK006_E_167_O2_WF:0.00000002,CebrOK033_J_140_O2_WF:0.00000002)0.000000:0.00000002,((OK213_E_192_O2_WF:0.06985084,OK214_J_180_O2_WF:0.00000003)0.000000:0.01814409,(CebrOK035_J_199_O2_WF:0.00000002,(OK212_J_178_O2_WF:0.00000002,((((CebrOK035_J_167_O2_1:0.10744547,(OK213_E_002_A_1:1.86304358,SRX1323887_E_114_O2_1:0.15600344)0.000000:0.07382125)0.973000:0.63325420,(CebrOK035_J_168_O2_1:0.17342073,CebrOK035_J_169_O2_1:0.20868737)0.724000:0.12092538)0.855000:0.27464859,(OK193_E_148_O2_4:0.21574967,(((CebrOK035_J_194_O2_4:0.09515875,(CebrOK014_E_087_O2_4:0.00000002,(CebrOK016_E_100_O2_4:0.00000002,(OK005_J_170_O2_4:0.02002966,CebrOK033_J_138_O2_4:0.00000002)0.000000:0.00000002)0.000000:0.00000002)0.907000:0.08369916)0.955000:0.16430901,(CebrOK035_J_195_O2_4:0.21827413,((((CebrOK033_J_118_O2_2:0.00000002,CebrOK014_E_077_O2_2:0.00000002)0.977000:0.14227828,((OK005_J_149_O2_2:0.02436999,((CebrOK016_E_087_O2_2:0.04885889,((OK005_J_147_O2_2:0.00000002,OK005_J_148_O2_2:0.00000002)0.764000:0.02392001,(CebrOK014_E_078_O2_2:0.02439423,((OK005_J_150_O2_2:0.00000002,OK213_E_168_O2_2:0.00000002)0.950000:0.04889129,(CebrOK016_E_088_O2_2:0.00000002,CebrOK016_E_086_O2_2:0.00000002)0.000000:0.00000002)0.000000:0.00000002)0.904000:0.04895680)0.248000:0.02435615)0.000000:0.00000002,(CebrOK033_J_121_O2_2:0.00000002,CebrOK033_J_122_O2_2:0.00000002)0.000000:0.00000002)0.000000:0.00000002)0.990000:0.12601706,(CebrOK016_E_085_O2_2:0.00000002,CebrOK033_J_120_O2_2:0.02338503)0.000000:0.00000002)0.000000:0.00000002)0.603000:0.03232660,((CebrOK016_E_094_O2_2:0.00000002,(SRX1323887_E_121_O2_2:0.00000002,(CebrOK035_J_190_O2_2:1.29607021,(SRX1323887_E_120_O2_2:0.00000002,((SRX1323887_E_129_O2_10:0.03147160,CebrOK014_E_088_O2_10:0.03151452)0.593000:0.00734354,(OK006_E_166_O2_10:0.00000002,OK193_E_153_O2_10:0.00000002)0.679000:0.05709912)1.000000:1.08243512)0.732000:0.02933763)0.000000:0.00000002)0.816000:0.02922388)0.986000:0.26020749,((((OK213_E_183_O2_2:0.00000002,(OK213_E_184_O2_2:0.00000002,(CebrOK014_E_083_O2_2:0.02081069,(OK005_J_167_O2_2:0.00000002,CebrOK033_J_134_O2_2:0.00000002)0.000000:0.00000002)0.878000:0.02072337)0.790000:0.02068385)0.987000:0.20903216,(CebrOK035_J_192_O2_2:0.00000001,(OK213_E_182_O2_2:0.04314231,(SRX1323887_E_127_O2_2:0.02102582,(OK193_E_146_O2_2:0.00000002,(SRX1323887_E_126_O2_2:0.00000002,OK213_E_181_O2_2:0.00000002)0.000000:0.00000002)0.787000:0.02125122)0.900000:0.04325602)0.000000:0.00000001)0.876000:0.06849834)0.817000:0.04277934,((CebrOK035_J_183_O2_2:0.05424850,(((OK193_E_140_O2_2:0.02235195,(((OK212_J_167_O2_2:0.00000002,(CebrOK035_J_174_O2_2:0.00000002,OK214_J_150_O2_2:0.00000002)0.842000:0.02227884)0.850000:0.02230926,((OK213_E_171_O2_2:0.00000002,OK006_E_144_O2_2:0.02224046)0.000000:0.00000001,(SRX1323887_E_128_O2_6:0.47407351,(CebrOK035_J_122_O1_1:0.97606127,((OK006_E_215_Cerm10_1:0.00000002,(OK006_E_216_Cerm10_1:0.00000002,SRX1323887_E_182_Cerm10_1:0.00000002)0.000000:0.00000002)0.000000:0.00000001,(CebrOK016_E_127_Cerm10_1:0.00000002,(SRX1323887_E_183_Cerm10_1:0.00000002,(OK006_E_217_Cerm10_1:0.00000002,(((CebrOK014_E_115_Cerm10_1:0.00000002,CebrOK014_E_116_Cerm10_1:0.00000002)0.000000:0.00000002,(OK213_E_245_Cerm10_1:0.00000002,OK213_E_244_Cerm10_1:0.00000002)0.918000:0.02596299)0.849000:0.02589357,(((CebrOK035_J_281_Cerm10_1:0.09109349,OK193_E_202_Cerm10_1:0.00000002)0.826000:0.02561140,((CebrOK033_J_199_Cerm10_1:0.00000002,(OK212_J_243_Cerm10_1:0.00000002,OK005_J_253_Cerm10_1:0.00000002)0.000000:0.00000002)0.000000:0.00000002,(CebrOK035_J_282_Cerm10_1:0.05225748,OK214_J_250_Cerm10_1:0.00000002)0.826000:0.02556788)0.000000:0.00000002)0.000000:0.01298160,((OK212_J_249_Cver04:0.00000002,OK212_J_250_Cver04:0.00000002)0.797000:0.08010418,(CebrOK033_J_206_Cver04:0.00000002,(CebrOK035_J_292_Cver04:0.00000002,(OK005_J_261_Cver04:0.00000002,(OK006_E_224_Cver04:0.00000002,OK214_J_255_Cver04:0.00000002)0.000000:0.00000002)0.000000:0.00000002)0.000000:0.00000002)0.000000:0.00000002)0.997000:1.09940391)0.000000:0.01309836)0.000000:0.00000002)0.000000:0.00000002)0.000000:0.00000002)0.000000:0.00000001)0.921000:0.83566909)0.835000:0.68017180)0.801000:0.44379383)0.000000:0.00000001)0.857000:0.02180786,(CebrOK016_E_091_O2_2:0.00000002,(CebrOK035_J_175_O2_2:0.02216037,(CebrOK033_J_126_O2_2:0.00000002,(OK193_E_139_O2_2:0.00000002,(OK213_E_172_O2_2:0.00000002,(SRX1323887_E_116_O2_2:0.00000002,OK006_E_145_O2_2:0.00000003)0.000000:0.02230932)0.000000:0.00000002)0.000000:0.00000002)0.000000:0.00000002)0.843000:0.02214188)0.000000:0.00000002)0.000000:0.00000002)0.969000:0.13992097,((CebrOK033_J_127_O2_2:0.12469288,(OK005_J_152_O2_2:0.04566758,(((CebrOK033_J_124_O2_2:0.00000002,CebrOK033_J_125_O2_2:0.00000002)0.000000:0.00000002,(CebrOK014_E_080_O2_2:0.02283020,CebrOK016_E_090_O2_2:0.00000002)0.846000:0.02265349)0.922000:0.02275493,(OK213_E_169_O2_2:0.00000002,OK213_E_170_O2_2:0.00000002)0.000000:0.00000002)0.000000:0.00000002)0.779000:0.04933185)0.900000:0.10425900,(CebrOK035_J_172_O2_2:0.06906153,CebrOK035_J_173_O2_2:0.09203366)0.869000:0.08279311)0.739000:0.03762600)0.851000:0.06783003,(OK006_E_154_O2_2:0.06238570,(SRX1323887_E_125_O2_2:0.80421694,(CebrOK035_J_185_O2_2:0.00000001,((CebrOK035_J_186_O2_2:0.00000002,CebrOK035_J_187_O2_2:0.00000002)0.000000:0.00000002,CebrOK035_J_184_O2_2:0.00000002)0.000000:0.00000001)0.804000:0.17188455)0.751000:0.08921913)0.764000:0.03101564)0.777000:0.03385391)0.699000:0.01541873,((SRX1323887_E_123_O2_2:0.02937250,(SRX1323887_E_122_O2_2:0.00000002,CebrOK016_E_095_O2_2:0.00000002)0.000000:0.00000002)0.955000:0.09388093,((OK213_E_185_O2_2:0.00000002,(OK005_J_168_O2_2:0.00000002,(((CebrOK035_J_180_O2_2:0.00000002,((((OK214_J_160_O2_2:0.00000002,OK214_J_157_O2_2:0.02988527)0.000000:0.00000002,(OK214_J_170_O2_2:0.08187225,(OK213_E_177_O2_2:0.00000002,(OK214_J_159_O2_2:0.00000002,OK214_J_158_O2_2:0.00000002)0.000000:0.00000002)0.000000:0.00150250)0.000000:0.02833316)0.000000:0.00000002,((OK006_E_149_O2_2:0.00000002,(OK006_E_152_O2_2:0.00000002,OK006_E_150_O2_2:0.00000002)0.000000:0.00000002)0.824000:0.02976104,((CebrOK014_E_081_O2_2:0.00000002,(CebrOK033_J_130_O2_2:0.00000002,(OK005_J_158_O2_2:0.00000002,(OK212_J_172_O2_2:0.00000002,(OK213_E_176_O2_2:0.00000002,OK214_J_155_O2_2:0.00000002)0.000000:0.00000002)0.000000:0.00000002)0.000000:0.00000002)0.000000:0.00000002)0.000000:0.00000002,(OK005_J_159_O2_2:0.03086404,(OK006_E_151_O2_2:0.02988466,(OK005_J_157_O2_2:0.00000002,OK214_J_156_O2_2:0.00000002)0.000000:0.00000002)0.925000:0.05957852)0.000000:0.00000002)0.000000:0.00000002)0.885000:0.03052829)0.830000:0.03053203,OK005_J_156_O2_2:0.00000002)0.000000:0.00000002)0.858000:0.06396028,(OK005_J_155_O2_2:0.00000002,(CebrOK033_J_129_O2_2:0.00000002,(CebrOK035_J_178_O2_2:0.00000002,(OK006_E_147_O2_2:0.00000002,(OK006_E_148_O2_2:0.00000002,(OK193_E_142_O2_2:0.00000002,(OK212_J_171_O2_2:0.00000002,(OK213_E_175_O2_2:0.00000002,(SRX1323887_E_119_O2_2:0.00000002,OK212_J_170_O2_2:0.00000002)0.000000:0.00000002)0.000000:0.00000002)0.000000:0.00000002)0.000000:0.00000002)0.000000:0.00000002)0.000000:0.00000002)0.000000:0.00000002)0.920000:0.06018574)0.829000:0.06095179)0.965000:0.18018014,(CebrOK014_E_084_O2_2:0.02083842,(CebrOK016_E_097_O2_2:0.00000002,(CebrOK016_E_098_O2_2:0.00000002,(CebrOK033_J_135_O2_2:0.00000002,CebrOK033_J_136_O2_2:0.00000002)0.000000:0.00000002)0.000000:0.00000002)0.834000:0.02059069)0.000000:0.00000002)0.005000:0.01985269)0.848000:0.04024052)0.994000:0.13178406,(((OK193_E_145_O2_2:0.00000002,OK213_E_179_O2_2:0.00000002)0.923000:0.09367076,(OK005_J_161_O2_2:0.00000001,(((((SRX1323887_E_018_B2:0.10612434,(OK005_J_012_B2:0.00000002,OK213_E_017_B2:0.00000002)0.000000:0.00000002)0.853000:0.10421161,(SRX1323887_E_015_B2:0.10505614,(OK005_J_014_B2:0.00000002,(OK193_E_018_B2:0.00000002,(OK213_E_019_B2:0.00000002,SRX1323887_E_017_B2:0.00000002)0.000000:0.00000002)0.000000:0.00000002)0.000000:0.00000002)0.871000:0.10625977)0.000000:0.00000002,(SRX1323887_E_016_B2:0.11006789,((OK212_J_017_B2:0.00000002,CebrOK016_E_008_B2:0.00000002)0.000000:0.00000002,(CebrOK035_J_021_B2:0.00000002,CebrOK035_J_022_B2:0.00000002)0.923000:0.10947276)0.000000:0.00000002)0.850000:0.10981202)0.000000:0.00000002,(OK213_E_013_B2:0.10448437,((OK006_E_013_B2:0.05291316,OK006_E_011_B2:0.07992018)0.584000:0.05125044,(CebrOK014_E_004_B2:0.00000002,(CebrOK016_E_004_B2:0.00000002,(CebrOK016_E_005_B2:0.00000002,(CebrOK033_J_011_B2:0.00000002,(CebrOK035_J_018_B2:0.00000002,(OK005_J_011_B2:0.00000002,(OK005_J_013_B2:0.00000002,(OK006_E_012_B2:0.00000002,(OK006_E_016_B2:0.00000002,(OK193_E_010_B2:0.00000002,(OK212_J_014_B2:0.00000002,(OK212_J_016_B2:0.00000002,(OK213_E_012_B2:0.00000002,(OK214_J_010_B2:0.00000002,(SRX1323887_E_012_B2:0.00000002,(SRX1323887_E_013_B2:0.00000002,OK213_E_016_B2:0.10559123)0.000000:0.00000002)0.000000:0.00000002)0.000000:0.00000002)0.000000:0.00000002)0.000000:0.00000002)0.000000:0.00000002)0.000000:0.00000002)0.000000:0.00000002)0.000000:0.00000002)0.000000:0.00000002)0.000000:0.00000002)0.000000:0.00000002)0.000000:0.00000002)0.000000:0.00000002)0.000000:0.00000002)0.000000:0.00000002)0.000000:0.00000002)0.460000:0.09367842)0.992000:1.00127199,(CebrOK033_J_132_O2_2:0.00000002,(CebrOK016_E_096_O2_2:0.02273726,CebrOK014_E_082_O2_2:0.00000002)0.895000:0.02273034)0.000000:0.02296120)0.000000:0.00000003)0.795000:0.02713095)0.830000:0.04330833,((OK213_E_173_O2_2:0.00000002,(CebrOK033_J_133_O2_2:0.00000002,(CebrOK035_J_188_O2_2:0.00000002,(OK005_J_162_O2_2:0.00000002,(OK006_E_156_O2_2:0.00000002,(OK212_J_175_O2_2:0.00000002,(OK214_J_176_O2_2:0.00000002,OK213_E_180_O2_2:0.00000002)0.000000:0.00000002)0.000000:0.00000002)0.000000:0.00000002)0.000000:0.00000002)0.000000:0.00000002)0.951000:0.14838934)0.565000:0.03568721,((SRX1323887_E_117_O2_2:0.00000002,CebrOK016_E_092_O2_2:0.00000002)0.000000:0.00000002,((CebrOK033_J_128_O2_2:0.00000002,OK006_E_146_O2_2:0.06592536)0.821000:0.03236159,(CebrOK035_J_176_O2_2:0.00000002,(CebrOK035_J_177_O2_2:0.00000002,(OK193_E_141_O2_2:0.00000002,(OK212_J_168_O2_2:0.00000002,(OK212_J_169_O2_2:0.00000002,(OK213_E_174_O2_2:0.00000002,(OK214_J_151_O2_2:0.00000002,(OK214_J_152_O2_2:0.00000002,SRX1323887_E_118_O2_2:0.00000002)0.000000:0.00000002)0.000000:0.00000002)0.000000:0.00000002)0.000000:0.00000002)0.000000:0.00000002)0.000000:0.00000002)0.000000:0.00000002)0.000000:0.00000002)0.855000:0.03216343)0.000000:0.00000002)0.752000:0.03275310)0.798000:0.02566243)0.000000:0.00000002)0.000000:0.00000002)0.760000:0.02518069)0.908000:0.07079119,((CebrOK033_J_137_O2_2:0.00000002,(CebrOK016_E_099_O2_2:0.02651643,CebrOK014_E_085_O2_2:0.02698772)0.564000:0.05462448)0.962000:0.21933307,((CebrOK033_J_131_O2_2:0.00000002,OK213_E_178_O2_2:0.06030790)0.783000:0.03049309,(OK214_J_173_O2_2:0.00000002,SRX1323887_E_124_O2_2:0.06027059)0.786000:0.02958789)0.932000:0.09528082)0.000000:0.00000002)0.000000:0.00000002)0.838000:0.06390020)0.425000:0.03310930,((CebrOK016_E_084_O2_2:0.00000002,SRX1323887_E_115_O2_2:0.00000002)0.000000:0.00000002,(CebrOK014_E_076_O2_2:0.00000002,(OK213_E_166_O2_2:0.00000002,(OK212_J_166_O2_2:0.02298716,(CebrOK033_J_117_O2_2:0.00000002,(CebrOK035_J_170_O2_2:0.00000002,(OK214_J_149_O2_2:0.00000002,OK006_E_143_O2_2:0.00000002)0.000000:0.00000002)0.000000:0.00000002)0.793000:0.02259684)0.791000:0.02315140)0.833000:0.02306027)0.743000:0.02313950)0.883000:0.06250717)0.874000:0.11173815)0.821000:0.07519300)0.913000:0.11954157,(OK006_E_165_O2_4:0.12899249,(((OK006_E_159_O2_4:0.02084789,((OK006_E_157_O2_4:0.00000002,OK006_E_161_O2_4:0.00002994)0.000000:0.01239431,(OK006_E_160_O2_4:0.00000002,OK006_E_158_O2_4:0.00000002)0.000000:0.01011377)0.724000:0.01726677)0.956000:0.08679587,(OK006_E_162_O2_4:0.00000002,(CebrOK014_E_086_O2_4:0.02058283,(OK193_E_150_O2_4:0.00000002,(SRX1323887_E_130_O2_11:0.00084964,(CebrOK033_J_139_O2_11:0.02311824,((OK214_J_177_O2_11:0.00000002,OK212_J_176_O2_11:0.00000002)0.918000:0.02308665,(CebrOK035_J_196_O2_11:0.00000002,OK005_J_171_O2_11:0.00000002)0.000000:0.00000002)0.000000:0.00000002)0.832000:0.12484061)1.000000:0.91750275)0.000000:0.00000002)0.802000:0.02108765)0.847000:0.04243609)0.841000:0.05288686,(OK006_E_163_O2_4:0.11686140,(OK193_E_151_O2_4:0.17955184,(OK005_J_169_O2_4:0.00000002,(OK193_E_152_O2_4:0.00000002,OK213_E_186_O2_4:0.00000002)0.000000:0.00000002)0.917000:0.10416479)0.544000:0.02294381)0.825000:0.05327440)0.454000:0.02606500)0.830000:0.08121871)0.637000:0.03206161)0.853000:0.28717408)0.954000:0.50528662,(OK212_J_179_O2_WF:0.03353918,((CebrOK016_E_101_O2_WF:0.00000002,(CebrOK014_E_089_O2_WF:0.01846794,(OK213_E_189_O2_WF:0.00000002,(OK005_J_173_O2_WF:0.01740908,OK213_E_191_O2_WF:0.17270670)0.868000:0.03475444)0.980000:0.09318956)0.812000:0.05426123)0.947000:0.07491604,(((CebrOK035_J_200_O2_WF:0.00000002,CebrOK035_J_198_O2_WF:0.00000002)0.000000:0.00000002,(CebrOK033_J_142_O2_WF:0.00000002,(OK193_E_155_O2_WF:0.00000002,(OK213_E_188_O2_WF:0.01913736,(SRX1323887_E_131_O2_WF:0.00000002,(OK005_J_177_O2_WF:0.03608500,((SRX1323887_E_132_O2_WF:0.00000002,OK214_J_178_O2_WF:0.00000002)0.000000:0.00000002,(OK214_J_179_O2_WF:0.01974600,(OK214_J_181_O2_WF:0.00000002,(OK212_J_180_O2_WF:0.03552442,OK006_E_171_O2_WF:0.00000002)0.000000:0.00000002)0.000000:0.00000002)0.000000:0.00000002)0.000000:0.00000002)0.819000:0.03290569)0.000000:0.00000002)0.000000:0.00000002)0.000000:0.00000002)0.809000:0.01773854)0.921000:0.06756159,(CebrOK035_J_197_O2_WF:0.00000002,(OK214_J_182_O2_WF:0.13809149,SRX1323887_E_133_O2_WF:0.12690205)0.564000:0.01090474)0.852000:0.03624585)0.835000:0.04941061)0.782000:0.03421492)0.000000:0.00000002)0.800000:0.01797803)0.000000:0.00000002)0.000000:0.00000002)0.880000:0.01791170)0.824000:0.01784512)0.987000:0.13805546)0.704000:0.03260134)0.911000:0.53606469,(CebrOK035_J_254_V_1a:1.20575415,((CebrOK035_J_058_I2_2:0.27448179,((CebrOK014_E_022_I2_2:0.00000002,(CebrOK016_E_026_I2_2:0.00000002,(CebrOK033_J_047_I2_2:0.00000002,(CebrOK035_J_057_I2_2:0.00000002,(OK005_J_054_I2_2:0.00000002,(OK006_E_066_I2_2:0.00000002,(OK212_J_067_I2_2:0.00000002,(OK214_J_063_I2_2:0.00000002,OK213_E_063_I2_2:0.00000002)0.000000:0.00000002)0.000000:0.00000002)0.000000:0.00000002)0.000000:0.00000002)0.000000:0.00000002)0.000000:0.00000002)0.000000:0.00000002)0.000000:0.00000002,OK212_J_071_I2_2:0.16404838)0.000000:0.00000002)0.870000:0.59215486,(OK006_E_062_I2_1:0.00000002,((OK006_E_060_I2_1:0.00000002,(OK006_E_061_I2_1:0.00000002,(OK214_J_061_I2_1:0.00000002,OK214_J_059_I2_1:0.00000002)0.000000:0.00000002)0.000000:0.00000002)0.000000:0.00000001,(CebrOK035_J_055_I2_1:0.00000002,(((OK006_E_065_I2_1:0.00000002,((CebrOK014_E_021_I2_1:0.00000002,(CebrOK016_E_025_I2_1:0.00000002,OK193_E_046_I2_1:0.00000002)0.000000:0.00000002)0.000000:0.00000002,(OK005_J_051_I2_1:0.00000001,((OK213_E_059_I2_1:0.00000002,(OK213_E_060_I2_1:0.00000002,SRX1323887_E_043_I2_1:0.00000002)0.000000:0.00000002)0.000000:0.00000002,(((SRX1323887_E_046_I2_1:0.13325690,(CebrOK014_E_019_I2_1:0.00000002,CebrOK033_J_046_I2_1:0.00000002)0.799000:0.05715615)0.881000:0.11610645,(SRX1323887_E_047_I2_1:0.00000002,(CebrOK014_E_020_I2_1:0.23988219,(OK213_E_062_I2_1:0.00000002,OK005_J_053_I2_1:0.00000002)0.000000:0.00000002)0.955000:0.17454611)0.791000:0.05765644)0.760000:0.05524933,(OK006_E_063_I2_1:0.03680660,(CebrOK035_J_056_I2_1:0.12165783,OK005_J_052_I2_1:0.26872582)0.735000:0.04957568)0.562000:0.02352931)0.000000:0.00000002)0.000000:0.00000001)0.994000:0.32497945)0.815000:0.04642197)0.860000:0.04601408,((CebrOK033_J_050_I4:0.00000002,((CebrOK035_J_064_I4:0.00000001,SRX1323887_E_050_I4:0.59012886)0.000000:0.00000001,(OK005_J_057_I4:0.00000002,(OK006_E_070_I4:0.00000002,(OK212_J_076_I4:0.00000002,OK214_J_068_I4:0.00000002)0.000000:0.00000002)0.000000:0.00000002)0.000000:0.00000002)0.000000:0.00000002)1.000000:1.81776237,OK006_E_064_I2_1:0.00000001)0.000000:0.00000001)0.857000:0.05698578,((CebrOK033_J_044_I2_1:0.00000002,(CebrOK033_J_045_I2_1:0.00000002,(OK005_J_049_I2_1:0.00000002,(OK005_J_050_I2_1:0.00000002,(OK212_J_055_I2_1:0.00000002,(OK212_J_057_I2_1:0.00000002,(OK212_J_061_I2_1:0.00000002,(OK212_J_062_I2_1:0.00000002,(OK212_J_063_I2_1:0.00000002,(OK213_E_057_I2_1:0.00000002,(OK213_E_058_I2_1:0.00000002,OK212_J_064_I2_1:0.25348212)0.000000:0.00000002)0.000000:0.00000002)0.000000:0.00000002)0.000000:0.00000002)0.000000:0.00000002)0.000000:0.00000002)0.000000:0.00000002)0.000000:0.00000002)0.000000:0.00000002)0.000000:0.00000002)0.748000:0.04799324,(OK212_J_056_I2_1:0.00000001,OK212_J_059_I2_1:0.12312753)0.000000:0.01875306)0.754000:0.05285744)0.000000:0.00000002)0.000000:0.00000001)0.814000:0.05864227)0.699000:0.16277349)0.765000:0.30900889)0.733000:0.51236866)0.698000:0.35144117,(((((SRX1323887_E_051_J_1:0.06623084,((OK006_E_073_J_1:0.00000002,CebrOK014_E_028_J_1:0.00000002)0.000000:0.00000002,((CebrOK016_E_030_J_1:0.02725907,(CebrOK035_J_069_J_1:0.02825787,(CebrOK033_J_052_J_1:0.00000002,(OK006_E_072_J_1:0.00000002,(OK212_J_077_J_1:0.00000002,(OK214_J_070_J_1:0.00000002,OK213_E_070_J_1:0.00000002)0.000000:0.00000002)0.000000:0.00000002)0.000000:0.00000002)0.000000:0.00000002)0.757000:0.02981701)0.979000:0.30039940,((((CebrOK016_E_033_J_1:0.00000002,(CebrOK033_J_054_J_1:0.03031226,(CebrOK014_E_026_J_1:0.00000002,CebrOK016_E_032_J_1:0.00000002)0.000000:0.00000002)0.000000:0.00000002)0.000000:0.03004047,(OK005_J_061_J_1:0.00000002,(OK005_J_060_J_1:0.00000002,OK005_J_059_J_1:0.07901271)0.791000:0.06335092)0.733000:0.06241228)0.916000:0.06394410,(CebrOK033_J_055_J_1:0.00000002,CebrOK014_E_027_J_1:0.00000002)0.000000:0.00000002)0.773000:0.05493778,(CebrOK035_J_070_J_1:0.20272182,(CebrOK014_E_025_J_1:0.00000002,(CebrOK016_E_031_J_1:0.00000002,CebrOK033_J_053_J_1:0.00000002)0.000000:0.00000002)0.000000:0.00000003)0.000000:0.05592795)0.910000:0.15425684)0.000000:0.00000002)0.000000:0.00000002)0.887000:0.17123497,(OK006_E_071_J_1:0.13580766,CebrOK035_J_068_J_1:0.00000000)0.000000:0.00000000)0.880000:0.56101482,(CebrOK035_J_071_J_2:0.12158070,(OK212_J_078_J_2:0.00000002,OK214_J_072_J_2:0.06162451)0.815000:0.18171059)0.864000:0.63185989)0.946000:0.88056072,((OK212_J_004_A2:0.02335898,(CebrOK033_J_003_A2:0.00000002,(OK214_J_003_A2:0.00000002,CebrOK035_J_006_A2:0.00000002)0.000000:0.00000002)0.000000:0.00000002)0.000000:0.05229634,(OK214_J_025_Conkunitzin_8:0.84738157,((CebrOK035_J_326_Tand01:0.00000002,(CebrOK035_J_327_Tand01:0.00000002,(CebrOK035_J_328_Tand01:0.00000002,(CebrOK035_J_329_Tand01:0.00000002,(OK005_J_288_Tand01:0.00000002,(OK212_J_272_Tand01:0.00000002,OK214_J_287_Tand01:0.00000002)0.000000:0.00000002)0.000000:0.00000002)0.000000:0.00000002)0.000000:0.00000002)0.000000:0.00000002)0.000000:0.00000002,(CebrOK033_J_230_Tand01:0.00000002,(OK006_E_260_Tand01:0.00000002,(OK193_E_234_Tand01:0.00000002,(OK213_E_278_Tand01:0.00000002,SRX1323887_E_217_Tand01:0.00000002)0.000000:0.00000002)0.000000:0.00000002)0.927000:0.05636951)0.000000:0.00000002)0.921000:1.79978506)0.855000:0.92421974)0.175000:0.64793693)0.557000:0.32819203,(((OK213_E_011_B1:0.00000002,OK193_E_009_B1:0.00000002)0.997000:0.75790605,SRX1323887_E_011_B1:0.06508591)0.000000:0.00000002,(CebrOK033_J_010_B1:0.00000002,(CebrOK035_J_015_B1:0.00000002,(OK212_J_012_B1:0.00000002,((OK005_J_009_B1:0.00000002,OK005_J_010_B1:0.00000002)0.915000:0.06492010,OK214_J_008_B1:0.00000002)0.000000:0.00000002)0.000000:0.00000002)0.000000:0.00000002)0.748000:0.07024353)0.921000:0.99233274)0.875000:0.75682223)0.000000:0.00000003)0.854000:0.31502049,(OK005_J_199_T_1:1.40926987,((((((OK213_E_269_Rimp05:0.00000002,OK193_E_225_Rimp05:0.00000002)0.775000:0.02059088,(CebrOK035_J_316_Rimp05:0.25616739,(SRX1323887_E_206_Rimp05:0.00000002,((OK214_J_029_Conkunitzin_11:0.19665172,(OK213_E_031_Conkunitzin_11:0.00000002,OK214_J_028_Conkunitzin_11:0.00000002)0.000000:0.00000002)0.959000:1.75171089,((SRX1323887_E_173_Cerm02:0.04495046,((OK213_E_228_Cerm02:0.00000002,SRX1323887_E_171_Cerm02:0.00000002)0.000000:0.00000002,OK193_E_187_Cerm02:0.00000002)0.000000:0.00000002)0.854000:0.08764349,((CebrOK016_E_123_Cerm02:0.05961751,(CebrOK016_E_122_Cerm02:0.02612677,OK212_J_210_Cerm02:0.00000002)0.903000:0.11391553)0.449000:0.05631529,SRX1323887_E_172_Cerm02:0.11054840)0.000000:0.00000002)0.804000:1.26851754)0.760000:0.83962685)0.763000:0.02037571)0.739000:0.02053126)0.755000:0.05518662,(CebrOK035_J_318_Rimp05:0.00000002,OK214_J_278_Rimp05:0.02829013)0.830000:0.09182744)0.891000:0.67850758,(((CebrOK014_E_105_T_5:0.00000002,OK006_E_193_T_5:0.00000002)0.661000:0.31093646,(OK193_E_025_Conkunitzin_5:0.00000001,(OK213_E_027_Conkunitzin_5:0.00000002,OK006_E_025_Conkunitzin_5:0.00000002)0.000000:0.00000001)0.972000:1.79239673)0.776000:0.69269630,(CebrOK035_J_308_Pmag02:0.75856771,(((CebrOK033_J_194_Cerm06_1:0.00000002,(OK214_J_244_Cerm06_1:0.00000002,OK212_J_237_Cerm06_1:0.00000002)0.000000:0.00000002)0.860000:0.03519012,(OK006_E_209_Cerm06_1:0.00000002,(OK193_E_197_Cerm06_1:0.00000002,(SRX1323887_E_181_Cerm06_1:0.00000002,OK213_E_239_Cerm06_1:0.00000002)0.000000:0.00000002)0.000000:0.00000002)0.000000:0.00000002)0.965000:1.04561771,(OK006_E_210_Cerm06_2:0.00000002,(OK193_E_198_Cerm06_2:0.00000002,(OK213_E_240_Cerm06_2:0.00000002,OK214_J_245_Cerm06_2:0.06089940)0.830000:0.05948248)0.000000:0.00000002)0.691000:0.11299261)0.557000:0.12326871)0.806000:0.77531075)0.850000:0.95549682)0.000000:0.13517741,((OK005_J_248_Cerm04:0.02215421,(OK006_E_208_Cerm04:0.00000002,OK005_J_249_Cerm04:0.02114970)0.000000:0.00000002)0.989000:1.11308455,(CebrOK014_E_063_O1_2:0.00000002,((OK006_E_129_O1_2:0.00000002,(OK006_E_130_O1_2:0.00000002,(OK193_E_121_O1_1:0.09066687,(((OK006_E_117_O1_1:0.00000002,OK214_J_122_O1_1:0.00000002)0.842000:0.23009092,(OK214_J_021_Conkunitzin_6:0.99462062,(CebrOK033_J_232_Virro03:0.00000002,CebrOK014_E_133_Virro03:0.04025156)0.881000:0.42802744)0.867000:0.52564602)0.754000:0.30067165,((OK193_E_122_O1_1:0.00000002,OK193_E_123_O1_1:0.00000002)0.711000:0.02598458,(OK193_E_124_O1_1:0.00000002,OK005_J_108_O1_1:0.20647628)0.837000:0.04551916)0.690000:0.03689115)0.611000:0.08710349)0.990000:0.25257743)0.897000:0.04359048)0.913000:0.04443534,((CebrOK016_E_068_O1_2:0.00000002,(SRX1323887_E_095_O1_2:0.00000002,OK193_E_126_O1_2:0.00000002)0.000000:0.00000002)0.000000:0.00000002,(CebrOK014_E_061_O1_2:0.00000002,((OK006_E_127_O1_2:0.00000002,((OK213_E_149_O1_2:0.00000002,((CebrOK014_E_062_O1_2:0.00000002,(((OK006_E_122_O1_1:0.00000002,OK213_E_138_O1_1:0.00000002)0.999000:1.04630092,(OK005_J_118_O1_2:0.00000002,OK005_J_119_O1_2:0.02354443)0.000000:0.00000001)0.914000:0.04714597,((OK214_J_130_O1_2:0.02420055,(OK005_J_117_O1_2:0.00000002,(OK006_E_128_O1_2:0.00000002,(OK213_E_150_O1_2:0.00000002,OK213_E_146_O1_2:0.00000002)0.000000:0.00000002)0.000000:0.00000002)0.775000:0.02395135)0.807000:0.02398171,(OK214_J_131_O1_2:0.02397611,(CebrOK016_E_069_O1_2:0.00000002,CebrOK016_E_070_O1_2:0.00000002)0.000000:0.00000002)0.000000:0.00000002)0.000000:0.00000002)0.826000:0.02338832)0.857000:0.04681092,(OK212_J_149_O1_2:0.02420299,((((CebrOK035_J_126_O1_2:0.00000002,OK213_E_148_O1_2:0.00000002)0.000000:0.00000002,(OK006_E_126_O1_2:0.02412531,OK006_E_125_O1_2:0.00000002)0.278000:0.02408248)0.858000:0.02377635,(OK212_J_147_O1_2:0.00000002,CebrOK035_J_125_O1_2:0.00000002)0.000000:0.00000002)0.000000:0.00000002,(OK005_J_122_O1_2:0.07894178,(OK212_J_148_O1_2:0.00000002,OK005_J_116_O1_2:0.00000002)0.000000:0.00000002)0.827000:0.02359719)0.786000:0.02370441)0.769000:0.02362041)0.000000:0.00000002)0.000000:0.00000002,(CebrOK033_J_095_O1_2:0.00000002,(CebrOK035_J_127_O1_2:0.00000002,(OK212_J_151_O1_2:0.00000002,OK214_J_134_O1_2:0.00000002)0.000000:0.00000002)0.000000:0.00000002)0.986000:0.13949466)0.812000:0.02338930)0.899000:0.04687068,(CebrOK033_J_092_O1_2:0.02322140,((OK213_E_145_O1_2:0.00000002,(OK214_J_127_O1_2:0.00000002,(CebrOK033_J_090_O1_2:0.02341345,(CebrOK035_J_123_O1_2:0.00000002,(((CebrOK035_J_124_O1_2:0.00000002,(OK006_E_124_O1_2:0.00000002,(OK212_J_143_O1_2:0.00000002,OK213_E_151_O1_2:0.00000002)0.000000:0.00000002)0.000000:0.00000002)0.000000:0.00000002,((OK005_J_114_O1_2:0.00000002,OK005_J_120_O1_2:0.00000002)0.000000:0.00000002,((OK005_J_115_O1_2:0.00000002,OK212_J_144_O1_2:0.00000002)0.000000:0.00000002,(OK005_J_121_O1_2:0.04644943,(CebrOK033_J_091_O1_2:0.00000002,CebrOK033_J_094_O1_2:0.00000002)0.000000:0.00000002)0.819000:0.02272511)0.844000:0.02283423)0.852000:0.02287928)0.000000:0.00000001,(((CebrOK014_E_117_Cerm10_2:0.00000002,(SRX1323887_E_184_Cerm10_2:0.00000002,CebrOK016_E_129_Cerm10_2:0.00000002)0.000000:0.00000002)0.879000:0.03285321,(OK193_E_203_Cerm10_2:0.00000002,OK006_E_219_Cerm10_2:0.00000002)0.000000:0.00000001)0.000000:0.00000001,(OK006_E_218_Cerm10_2:0.03266859,(CebrOK033_J_200_Cerm10_2:0.00000002,(CebrOK035_J_284_Cerm10_2:0.00000002,(OK212_J_244_Cerm10_2:0.00000002,(OK213_E_246_Cerm10_2:0.00000002,OK214_J_251_Cerm10_2:0.00000002)0.000000:0.00000002)0.000000:0.00000002)0.000000:0.00000002)0.790000:0.03336094)0.731000:0.03291035)1.000000:1.17413186)0.000000:0.00000001)0.780000:0.02196135)0.801000:0.02228035)0.848000:0.02264362)0.919000:0.04562121,(OK213_E_142_O1_2:0.00000002,((((CebrOK014_E_060_O1_1:0.00000002,(OK006_E_123_O1_1:0.00000002,(SRX1323887_E_094_O1_1:0.00000002,OK213_E_139_O1_1:0.00000002)0.000000:0.00000002)0.000000:0.00000002)0.998000:0.33211019,(((OK005_J_111_O1_1:0.21535209,OK005_J_110_O1_1:0.08037629)0.475000:0.04494758,((CebrOK035_J_120_O1_1:0.01975468,(CebrOK033_J_088_O1_1:0.00000002,(OK005_J_109_O1_1:0.00000002,(OK006_E_119_O1_1:0.00000002,(OK212_J_140_O1_1:0.00000002,(OK213_E_137_O1_1:0.00000002,OK214_J_123_O1_1:0.00000002)0.000000:0.00000002)0.000000:0.00000002)0.000000:0.00000002)0.000000:0.00000002)0.000000:0.00000002)0.998000:0.31786332,(SRX1323887_E_092_O1_1:0.12772592,SRX1323887_E_093_O1_1:0.00000002)0.958000:0.13530183)0.000000:0.00072474)0.974000:0.20816888,((OK006_E_121_O1_1:0.00000002,(OK214_J_124_O1_1:0.00000002,OK212_J_142_O1_1:0.00000002)0.000000:0.00000002)0.984000:0.30072127,((CebrOK014_E_075_O1_9:0.00000001,(CebrOK016_E_083_O1_9:0.00000002,CebrOK033_J_115_O1_9:0.00000002)0.000000:0.00000002)0.641000:0.03779122,(OK214_J_148_O1_9:0.01754272,CebrOK033_J_116_O1_9:0.01843327)0.787000:0.07304401)1.000000:0.61750959)0.000000:0.00000002)0.780000:0.07108821)0.878000:0.13323219,(OK005_J_125_O1_2:0.16321023,((OK005_J_123_O1_2:0.00000002,OK212_J_154_O1_2:0.02200671)0.000000:0.00000002,(OK005_J_124_O1_2:0.02192505,OK214_J_136_O1_2:0.00000002)0.747000:0.02212098)0.922000:0.10841707)0.737000:0.03913225)0.549000:0.02517271,(((OK006_E_131_O1_2:0.03177996,OK214_J_137_O1_2:0.00000002)0.938000:0.13713575,((SRX1323887_E_101_O1_2:0.00000002,SRX1323887_E_100_O1_2:0.07242818)0.944000:0.12843930,((SRX1323887_E_097_O1_2:0.04704990,(SRX1323887_E_099_O1_2:0.00000002,SRX1323887_E_098_O1_2:0.00000002)0.000000:0.00000002)0.888000:0.04841357,(((CebrOK035_J_136_O1_2:0.00000002,(CebrOK035_J_143_O1_2:0.00000002,CebrOK035_J_140_O1_2:0.00000002)0.911000:0.05898604)0.724000:0.02956193,((CebrOK035_J_142_O1_2:0.05789962,(CebrOK035_J_133_O1_2:0.00000002,(CebrOK035_J_135_O1_2:0.00000002,(CebrOK035_J_138_O1_2:0.00000002,CebrOK035_J_144_O1_2:0.00000002)0.000000:0.00000002)0.000000:0.00000002)0.000000:0.00000002)0.811000:0.02874366,(CebrOK035_J_134_O1_2:0.05724728,(CebrOK035_J_132_O1_2:0.00000002,(CebrOK035_J_137_O1_2:0.00000002,(CebrOK035_J_139_O1_2:0.00000002,CebrOK035_J_141_O1_2:0.00000002)0.000000:0.00000002)0.000000:0.00000002)0.000000:0.00000002)0.796000:0.02866406)0.000000:0.00000002)0.990000:0.22658034,((CebrOK033_J_097_O1_2:0.00000002,CebrOK016_E_071_O1_2:0.00000002)0.816000:0.02346988,(OK212_J_155_O1_2:0.02275012,OK212_J_156_O1_2:0.02311618)0.928000:0.04794491)0.000000:0.00000002)0.812000:0.04613758)0.749000:0.02454859)0.853000:0.09928422)0.854000:0.07807499,(SRX1323887_E_102_O1_2:0.12739704,((CebrOK035_J_131_O1_2:0.21374463,(((OK005_J_144_O1_5:0.00000002,OK005_J_145_O1_5:0.10697466)0.992000:0.73180260,(OK005_J_127_O1_3:0.00000002,(SRX1323887_E_105_O1_3:0.03287381,(OK213_E_153_O1_3:0.00000002,(OK213_E_154_O1_3:0.00000002,((OK213_E_155_O1_3:0.00000002,(CebrOK035_J_150_O1_3:0.17250320,(CebrOK014_E_065_O1_3:0.00000002,(CebrOK016_E_072_O1_3:0.00000002,(OK213_E_157_O1_3:0.00000002,CebrOK033_J_098_O1_3:0.00000002)0.000000:0.00000002)0.000000:0.00000002)0.000000:0.00000002)0.885000:0.04118823)0.000000:0.00000002,((OK005_J_128_O1_3:0.03516650,(SRX1323887_E_107_O1_3:0.02020632,SRX1323887_E_106_O1_3:0.00000002)0.784000:0.03261660)0.714000:0.01353960,(((OK213_E_152_O1_3:0.04166563,OK213_E_156_O1_3:0.00000002)0.983000:0.10312298,(CebrOK033_J_099_O1_3:0.04399031,CebrOK016_E_081_O1_3:0.29762339)0.732000:0.01783620)0.000000:0.00000002,(((OK193_E_127_O1_3:0.04144579,OK193_E_128_O1_3:0.00000002)0.896000:0.04023883,(((OK212_J_162_O1_3:0.14919593,(SRX1323887_E_113_O1_3:0.03642362,(CebrOK014_E_074_O1_3:0.00000002,(OK193_E_136_O1_3:0.00000002,(OK213_E_164_O1_3:0.00000002,OK005_J_141_O1_3:0.00000002)0.000000:0.00000002)0.000000:0.00000002)0.000000:0.00000002)0.991000:0.29388730)0.839000:0.06574694,(((CebrOK035_J_159_O1_3:0.02022673,CebrOK035_J_158_O1_3:0.00000002)0.972000:0.19320249,(CebrOK016_E_082_O1_3:0.35132308,(CebrOK035_J_155_O1_3:0.02193804,((((OK214_J_144_O1_3:0.00000002,CebrOK033_J_109_O1_3:0.00000002)0.000000:0.00000002,(OK212_J_164_O1_3:0.04170806,OK212_J_163_O1_3:0.00000002)0.842000:0.02084012)0.773000:0.02066598,((CebrOK014_E_073_O1_3:0.00000002,(CebrOK016_E_079_O1_3:0.00000002,(OK005_J_138_O1_3:0.00000002,(OK213_E_162_O1_3:0.00000002,OK193_E_134_O1_3:0.00000002)0.000000:0.00000002)0.000000:0.00000002)0.000000:0.00000002)0.000000:0.00000002,(OK006_E_142_O1_3:0.02050148,(OK193_E_133_O1_3:0.00000002,CebrOK014_E_068_O1_3:0.00000002)0.976000:0.08567870)0.000000:0.00000002)0.797000:0.02067188)0.886000:0.04185490,OK005_J_139_O1_3:0.00000002)0.000000:0.00000002)0.838000:0.06647369)0.844000:0.07293092)0.715000:0.04879351,((CebrOK035_J_156_O1_3:0.02439672,(OK213_E_163_O1_3:0.00639956,(CebrOK033_J_111_O1_3:0.00000002,CebrOK033_J_110_O1_3:0.00000002)0.806000:0.07627727)0.000000:0.01688822)0.965000:0.13232268,(((OK212_J_159_O1_3:0.02032787,OK212_J_160_O1_3:0.04127878)0.771000:0.02055660,((OK005_J_133_O1_3:0.04001118,CebrOK033_J_103_O1_3:0.00000002)0.896000:0.04057099,(OK006_E_136_O1_3:0.00000002,(CebrOK033_J_102_O1_3:0.00000002,(CebrOK035_J_151_O1_3:0.00000002,(OK005_J_132_O1_3:0.00000002,(OK212_J_158_O1_3:0.02055452,OK214_J_138_O1_3:0.00000002)0.000000:0.00000002)0.000000:0.00000002)0.000000:0.00000002)0.945000:0.04064919)0.000000:0.00000002)0.000000:0.00000002)0.988000:0.21537497,(OK214_J_145_O1_3:0.37903839,CebrOK016_E_080_O1_3:0.00000002)0.589000:0.04605574)0.466000:0.03918391)0.901000:0.06742310)0.773000:0.02750246)0.000000:0.00000002,((OK006_E_138_O1_3:0.17243126,((CebrOK033_J_104_O1_3:0.00000002,CebrOK033_J_105_O1_3:0.00000002)0.000000:0.00000002,((OK212_J_161_O1_3:0.00000002,(CebrOK016_E_076_O1_3:0.03472830,SRX1323887_E_110_O1_3:0.00000002)0.953000:0.08091168)0.000000:0.00000002,(OK006_E_137_O1_3:0.00000002,(OK193_E_130_O1_3:0.00000002,(OK214_J_139_O1_3:0.00000002,OK213_E_160_O1_3:0.00000002)0.000000:0.00000002)0.000000:0.00000002)0.835000:0.02044942)0.809000:0.02028440)0.970000:0.13679642)0.849000:0.04066352,(SRX1323887_E_108_O1_3:0.08033286,(CebrOK035_J_153_O1_3:0.14843786,(CebrOK035_J_164_O1_3:0.02579934,(((CebrOK014_E_071_O1_3:0.00000002,(CebrOK016_E_077_O1_3:0.00000002,(CebrOK016_E_078_O1_3:0.00000002,(OK006_E_139_O1_3:0.00000002,(OK006_E_140_O1_3:0.00000002,(OK193_E_131_O1_3:0.00000002,(OK193_E_132_O1_3:0.00000002,(OK213_E_161_O1_3:0.00000002,SRX1323887_E_111_O1_3:0.00000002)0.000000:0.00000002)0.000000:0.00000002)0.000000:0.00000002)0.000000:0.00000002)0.000000:0.00000002)0.000000:0.00000002)0.000000:0.00000002)0.000000:0.00000002,(CebrOK014_E_072_O1_3:0.00000002,CebrOK014_E_070_O1_3:0.00000002)0.978000:0.08152817)0.000000:0.00000002,(CebrOK014_E_069_O1_3:0.00000002,((CebrOK033_J_108_O1_3:0.00000002,(OK214_J_141_O1_3:0.00000002,OK214_J_143_O1_3:0.00000002)0.000000:0.00000002)0.000000:0.00000002,(OK005_J_137_O1_3:0.01989605,(CebrOK033_J_107_O1_3:0.00000002,OK214_J_142_O1_3:0.00000002)0.000000:0.00000002)0.937000:0.03999041)0.908000:0.04175145)0.000000:0.00000002)0.998000:0.27306508)0.950000:0.12814895)0.721000:0.03322664)0.952000:0.13303986)0.000000:0.00000002)0.959000:0.06053264)0.000000:0.00000002,((CebrOK035_J_160_O1_3:0.02293219,(CebrOK035_J_161_O1_3:0.00000002,CebrOK035_J_162_O1_3:0.00000002)0.765000:0.02279692)0.917000:0.07785182,(CebrOK035_J_163_O1_3:0.07497474,(OK213_E_158_O1_3:0.00000002,((CebrOK033_J_100_O1_3:0.00000002,(CebrOK014_E_066_O1_3:0.00000001,(CebrOK033_J_101_O1_3:0.00000002,(CebrOK016_E_074_O1_3:0.00000002,(OK213_E_159_O1_3:0.05854240,OK005_J_131_O1_3:0.00000002)0.895000:0.08379689)0.906000:0.03871388)0.000000:0.00000001)0.987000:0.10759774)0.818000:0.01973244,OK005_J_130_O1_3:0.00000002)0.000000:0.00000002)0.971000:0.16462291)0.002000:0.02776222)0.803000:0.03848200)0.828000:0.01988441)0.832000:0.02065063)0.000000:0.00000002)0.947000:0.04297777)0.000000:0.00000002)0.700000:0.01422138)0.853000:0.03665127)0.933000:0.35301603)0.700000:0.17207159,(CebrOK033_J_113_O1_7b:0.00000002,(CebrOK035_J_166_O1_7b:0.00000002,(OK005_J_146_O1_7b:0.00000002,(OK212_J_165_O1_7b:0.00000002,OK214_J_147_O1_7b:0.00000002)0.000000:0.00000002)0.000000:0.00000002)0.000000:0.00000002)0.968000:0.25189072)0.894000:0.14292380)0.000000:0.00000001,SRX1323887_E_104_O1_2:0.42136433)0.000000:0.00000001)0.837000:0.04961200)0.000000:0.00000002)0.999000:0.33954789)0.000000:0.00000002)0.850000:0.02366707)0.000000:0.00000002)0.953000:0.07995992)0.000000:0.00000002)0.896000:0.05239186)0.000000:0.00000002)0.965000:0.73832178)0.791000:0.20075011)0.790000:0.16710684,((SRX1323887_E_032_Divergent_MRFYIGLMAA:1.16718762,((CebrOK014_E_122_Ggeo03_2:0.00000001,((OK006_E_234_Ggeo03_2:0.00000002,(OK213_E_257_Ggeo03_2:0.00000002,(OK213_E_258_Ggeo03_2:0.00000002,((CebrOK035_J_302_Ggeo03_2:0.00000002,(CebrOK035_J_303_Ggeo03_2:0.00000002,(CebrOK035_J_305_Ggeo03_2:0.00000002,(OK005_J_274_Ggeo03_2:0.00000002,(OK212_J_260_Ggeo03_2:0.00000002,(OK214_J_267_Ggeo03_2:0.00000002,OK212_J_261_Ggeo03_2:0.00000002)0.000000:0.00000002)0.000000:0.00000002)0.000000:0.00000002)0.000000:0.00000002)0.000000:0.00000002)0.000000:0.00000002,(CebrOK033_J_217_Ggeo03_2:0.00000002,CebrOK033_J_216_Ggeo03_2:0.00000002)0.837000:0.03320916)0.947000:0.06896378)0.835000:0.04023192)0.000000:0.00000002)0.971000:0.12596063,(CebrOK016_E_133_Ggeo03_2:0.00000002,(OK193_E_216_Ggeo03_2:0.00000002,(OK193_E_217_Ggeo03_2:0.00000002,((CebrOK035_J_304_Ggeo03_2:1.61067607,OK213_E_259_Ggeo03_2:0.00000001)0.000000:0.00000001,SRX1323887_E_196_Ggeo03_2:0.00000002)0.000000:0.00000002)0.000000:0.00000002)0.000000:0.00000002)0.000000:0.00000002)0.000000:0.00000001)0.768000:0.47247458,((((SRX1323887_E_157_T_2:0.16954319,((((OK214_J_213_T_3:0.00000001,(OK212_J_200_T_3:0.00000002,OK006_E_189_T_3:0.00000002)0.000000:0.00000001)0.838000:0.11081775,(CebrOK035_J_247_T_3:0.15593192,(CebrOK014_E_104_T_3:0.04488141,(SRX1323887_E_163_T_3_WF:0.00000002,(CebrOK035_J_248_T_3_WF:0.00000002,(SRX1323887_E_162_T_3_WF:0.00000002,(OK212_J_201_T_3_WFb:0.00000002,(CebrOK033_J_175_T_3WFb:0.00000002,(CebrOK035_J_249_T_3_WFb:0.00000002,OK214_J_215_T_3_WFb:0.00000002)0.000000:0.00000002)0.000000:0.00000002)0.000000:0.00000002)0.000000:0.00000002)0.000000:0.00000002)0.000000:0.20326629)0.863000:0.13184479)0.762000:0.14504959)0.750000:0.08713332,(SRX1323887_E_159_T_3:0.00000002,(SRX1323887_E_160_T_3:0.00000002,SRX1323887_E_161_T_3:0.00000002)0.000000:0.00000002)0.000000:0.00847985)0.853000:0.45535481,(((SRX1323887_E_156_T_1:0.00000002,(CebrOK035_J_231_T_1:0.00000002,CebrOK035_J_232_T_1:0.00000002)0.823000:0.02421102)0.877000:0.17564492,((((CebrOK014_E_102_T_1:0.00000002,(CebrOK016_E_117_T_1:0.00000002,CebrOK033_J_165_T_1:0.00000002)0.000000:0.00000002)1.000000:0.41154336,((CebrOK035_J_226_T_1:0.18262242,CebrOK035_J_227_T_1:0.15856554)0.866000:0.07167642,((((OK005_J_194_T_1:0.00000002,(OK193_E_177_T_1:0.00000002,OK193_E_178_T_1:0.00000002)0.000000:0.00000002)0.000000:0.00000002,(OK213_E_210_T_1:0.06103396,(SRX1323887_E_149_T_1:0.08842454,OK005_J_193_T_1:0.10993698)0.000000:0.00000002)0.000000:0.00000002)0.968000:0.08763508,((((OK193_E_175_T_1:0.11128994,((OK213_E_216_T_1:0.00000002,OK005_J_201_T_1:0.00000002)0.993000:0.21241242,(OK005_J_191_T_1:0.00000002,OK193_E_171_T_1:0.02095618)0.755000:0.03916642)0.000000:0.00383851)0.000000:0.00000002,((OK006_E_184_T_1:0.00000002,(OK193_E_172_T_1:0.00000002,(OK193_E_174_T_1:0.00000002,OK193_E_173_T_1:0.00000002)0.000000:0.00000002)0.871000:0.02130414)0.765000:0.02140171,(CebrOK035_J_233_T_1:0.06025906,(((OK214_J_202_T_1:0.00000002,OK214_J_203_T_1:0.00000002)0.961000:0.06140351,OK212_J_193_T_1:0.00000001)0.000000:0.00000001,(OK213_E_208_T_1:0.00000002,SRX1323887_E_147_T_1:0.00000002)0.000000:0.00000002)0.000000:0.00000002)0.785000:0.02085405)0.899000:0.04153565)0.875000:0.02046935,((OK005_J_192_T_1:0.02296438,OK213_E_209_T_1:0.00000002)0.968000:0.06722443,(SRX1323887_E_148_T_1:0.00000002,OK193_E_176_T_1:0.04335283)0.391000:0.02125916)0.000000:0.00000002)0.954000:0.06574702,(CebrOK035_J_225_T_1:0.13357892,((CebrOK033_J_160_T_1:0.08897089,((CebrOK016_E_112_T_1:0.00000002,CebrOK014_E_098_T_1:0.00000002)0.771000:0.02056319,CebrOK016_E_113_T_1:0.02104706)0.000000:0.00000002)0.939000:0.06680804,((CebrOK016_E_115_T_1:0.00000002,CebrOK014_E_100_T_1:0.00000002)0.939000:0.08743619,(CebrOK014_E_099_T_1:0.00000002,((CebrOK033_J_161_T_1:0.02111559,(CebrOK033_J_162_T_1:0.13233119,CebrOK016_E_114_T_1:0.00000002)0.779000:0.02136567)0.919000:0.06746416,(CebrOK033_J_164_T_1:0.09370751,OK005_J_202_T_1:0.45418804)0.873000:0.10338885)0.477000:0.05210348)0.863000:0.04331577)0.890000:0.08491863)0.000000:0.00000002)0.903000:0.04277842)0.000000:0.00000002)0.869000:0.04398807,((CebrOK014_E_101_T_1:0.02251690,(CebrOK016_E_116_T_1:0.00000002,CebrOK033_J_163_T_1:0.00000002)0.766000:0.02084301)0.913000:0.09963126,((OK005_J_195_T_1:0.16848693,OK213_E_207_T_1:0.10301619)0.727000:0.07760587,((OK214_J_205_T_1:0.02269845,(((OK005_J_196_T_1:0.00000002,(OK213_E_213_T_1:0.00000002,OK213_E_214_T_1:0.00000002)0.000000:0.00000002)0.922000:0.02266334,(OK005_J_197_T_1:0.00000002,(OK193_E_180_T_1:0.00000002,(SRX1323887_E_155_T_1:0.00000002,SRX1323887_E_154_T_1:0.00000002)0.000000:0.00000002)0.000000:0.00000002)0.000000:0.00000002)0.000000:0.00000002,OK212_J_194_T_1:0.02263443)0.000000:0.00000002)1.000000:0.46743218,(CebrOK014_E_097_T_1:0.06939284,CebrOK033_J_157_T_1:0.09632464)0.623000:0.05071539)0.450000:0.03014592)0.884000:0.11979187)0.839000:0.04922444)0.772000:0.02243349)0.700000:0.01956530)0.778000:0.02474145,(OK212_J_192_T_1:0.02301932,((CebrOK033_J_159_T_1:0.04289234,(CebrOK033_J_158_T_1:0.00000002,(OK005_J_189_T_1:0.00000002,OK214_J_201_T_1:0.00000002)0.000000:0.00000002)0.000000:0.00000002)0.000000:0.00000002,(CebrOK035_J_224_T_1:0.09493706,(OK212_J_195_T_1:0.00000002,OK005_J_198_T_1:0.00000002)0.985000:0.18809472)0.834000:0.06003653)0.866000:0.04304190)0.978000:0.11474195)0.000000:0.00000002,((CebrOK035_J_229_T_1:0.26043941,CebrOK035_J_234_T_1:0.44719397)0.000000:0.05055335,((OK212_J_196_T_1:0.05661439,CebrOK035_J_228_T_1:0.07968982)0.973000:0.13391148,(((SRX1323887_E_153_T_1:0.03993889,OK193_E_179_T_1:0.10083223)0.985000:0.24966693,(SRX1323887_E_152_T_1:0.00000002,(SRX1323887_E_150_T_1:0.00000002,SRX1323887_E_151_T_1:0.15235976)0.914000:0.14762931)0.858000:0.05256370)0.875000:0.06846120,((OK214_J_200_T_1:0.00000002,OK214_J_198_T_1:0.00000002)0.000000:0.00000002,(OK006_E_183_T_1:0.00000002,(OK006_E_182_T_1:0.02124595,OK214_J_199_T_1:0.00000002)0.842000:0.02150259)0.000000:0.00000002)0.979000:0.11594221)0.000000:0.00000002)0.000000:0.00000001)0.883000:0.04409801)0.926000:0.29362390)0.763000:0.25907930,(OK006_E_192_T_4:0.08485194,(OK005_J_206_T_4:0.00000002,(OK006_E_191_T_4:0.00000002,(OK193_E_183_T_4:0.00000002,(OK213_E_221_T_4:0.00000002,SRX1323887_E_164_T_4:0.00000002)0.000000:0.00000002)0.000000:0.00000002)0.000000:0.00000002)0.829000:0.24376600)0.888000:0.52610850)0.869000:0.46086645)0.921000:0.43515727)0.640000:0.12919033,(OK006_E_187_T_2_WF:0.03077307,((CebrOK033_J_173_T_2WF:0.00000001,(CebrOK033_J_171_T_2WF:0.00000002,((CebrOK035_J_244_T_2_WF:0.00000002,(CebrOK033_J_172_T_2WF:0.00000002,SRX1323887_E_158_T_2_WF:0.02983664)0.833000:0.02987908)0.826000:0.02942382,(OK214_J_210_T_2_WF:0.02520909,(OK214_J_212_T_2_WF:0.00000002,(OK213_E_218_T_2_WF:0.06364866,(((OK193_E_181_T_2_WF:0.00000002,OK213_E_217_T_2_WF:0.04168670)0.831000:0.02121263,((OK214_J_209_T_2_WF:0.00000002,OK005_J_204_T_2_WF:0.00000002)0.000000:0.00000002,OK006_E_186_T_2_WF:0.02091666)0.000000:0.00000002)0.000000:0.00000002,((OK212_J_199_T_2_WF:0.00000001,CebrOK035_J_246_T_2_WF:0.03043695)0.000000:0.00000001,((CebrOK033_J_174_T_2WF:0.00000002,(CebrOK033_J_170_T_2WF:0.00000002,CebrOK033_J_168_T_2WF:0.00000002)0.000000:0.00000002)0.000000:0.00000002,(OK213_E_220_T_2_WF:0.09779127,(CebrOK033_J_169_T_2WF:0.00000002,(CebrOK035_J_240_T_2_WF:0.00000002,(CebrOK035_J_245_T_2_WF:0.00000002,CebrOK035_J_243_T_2_WF:0.00000002)0.000000:0.00000002)0.862000:0.02111121)0.881000:0.04406989)0.773000:0.02048755)0.924000:0.04336955)0.834000:0.02092239)0.000000:0.00000002)0.846000:0.02771239)0.000000:0.00000002)0.929000:0.05596915)0.000000:0.00000002)0.000000:0.00000001)0.899000:0.08439051,(CebrOK035_J_241_T_2_WF:0.05357219,OK193_E_182_T_2_WF:0.08774988)0.612000:0.03274290)0.558000:0.05560690)0.788000:0.12964868)0.865000:0.17489499,(OK005_J_203_T_2:0.00000000,OK212_J_198_T_2:0.00000002)0.635000:0.01849088)0.761000:0.27054231,((CebrOK035_J_235_T_2:0.00000002,OK214_J_206_T_2:0.00000002)0.000000:0.00000002,((OK214_J_208_T_2:0.00000002,(CebrOK035_J_237_T_2:0.00000002,CebrOK035_J_238_T_2:0.00000002)0.000000:0.00000002)0.000000:0.00000002,((CebrOK035_J_236_T_2:0.00000002,OK214_J_207_T_2:0.00000002)0.916000:0.04729994,(OK212_J_197_T_2:0.00000002,(CebrOK033_J_166_T_2:0.00000002,CebrOK033_J_167_T_2:0.00000002)0.000000:0.00000002)0.000000:0.00000002)0.841000:0.02344579)0.000000:0.00000002)0.873000:0.66532819)0.972000:1.45800650)0.006000:0.32181851)0.858000:0.51203237,((OK213_E_268_Rimp02:0.00000002,(OK214_J_277_Rimp02:0.00000002,(CebrOK035_J_315_Rimp02:0.00000002,(OK006_E_222_Cerm11_2:0.00000002,OK005_J_257_Cerm11_2:0.00000002)1.000000:1.47923506)0.000000:0.00000002)0.802000:0.01597520)0.996000:1.25913902,(((OK214_J_227_Cerm03_4:0.00000002,(OK214_J_226_Cerm03_4:0.00000001,(((OK213_E_075_L:0.00000002,(SRX1323887_E_054_L:0.02283171,(CebrOK014_E_029_L:0.00000002,(OK006_E_075_L:0.00000002,CebrOK016_E_034_L:0.00000002)0.000000:0.00000002)0.000000:0.00000002)0.000000:0.02269014)1.000000:1.28991314,OK212_J_214_Cerm03_4:0.00000001)0.000000:0.00000001,(CebrOK035_J_265_Cerm03_4:0.00000002,CebrOK033_J_186_Cerm03_4:0.00000002)0.000000:0.00000002)0.000000:0.00000001)0.812000:0.02824526)0.959000:0.60466465,((((((CebrOK033_J_057_K:0.00000001,(OK214_J_074_K:0.00000002,(OK193_E_051_K:0.04254530,(OK214_J_073_K:0.00000002,OK212_J_079_K:0.00000002)0.000000:0.00000002)0.833000:0.04272123)0.415000:0.04229069)0.000000:0.00878029,(OK005_J_062_K:0.00000002,(SRX1323887_E_052_K:0.00000002,OK213_E_073_K:0.00000002)0.842000:0.04251347)0.000000:0.03447457)0.889000:0.17199784,(OK006_E_074_K:0.00000001,((OK005_J_019_Con_ikot_ikot_5:0.00000002,(OK214_J_019_Con_ikot_ikot_5:0.04226706,(CebrOK033_J_018_Con_ikot_ikot_5:0.00000002,OK212_J_023_Con_ikot_ikot_5:0.00000002)0.000000:0.00000002)0.781000:0.04371770)1.000000:1.12004194,(SRX1323887_E_053_K:0.00000002,OK213_E_074_K:0.00000002)0.792000:0.07779568)0.000000:0.00000001)0.415000:0.07819455)0.670000:0.15974702,((CebrOK014_E_001_A_1:0.00000001,((OK006_E_003_A_1:0.02130408,((((SRX1323887_E_005_A_1:0.00000002,(CebrOK035_J_001_A_1:0.00000001,(CebrOK035_J_003_A_1:0.00000002,CebrOK035_J_002_A_1:0.00000002)0.961000:0.17335225)0.715000:0.11068667)1.000000:1.23600792,(OK213_E_004_A_1:0.00000002,(OK213_E_005_A_1:0.02621816,(OK193_E_004_A_1:0.02605331,(CebrOK033_J_002_A_1:0.00000002,(CebrOK035_J_004_A_1:0.00000002,(OK214_J_001_A_1:0.00000002,OK212_J_002_A_1:0.00000002)0.000000:0.00000002)0.000000:0.00000002)0.000000:0.00000002)0.000000:0.00000002)0.846000:0.02623939)0.000000:0.00000002)0.902000:0.08292436,((OK006_E_004_A_2:0.00000002,(OK212_J_003_A_2:0.05676168,(OK005_J_002_A_2:0.00000002,(OK213_E_006_A_2:0.00000002,(OK193_E_006_A_2:0.03128430,(OK193_E_005_A_2:0.00000002,(SRX1323887_E_006_A_1:0.29113170,(SRX1323887_E_008_A_2:0.00000002,SRX1323887_E_009_A_2:0.00000002)0.723000:0.07790977)0.884000:0.15262998)0.809000:0.03080530)0.876000:0.06124512)0.000000:0.00000002)0.000000:0.00000002)0.923000:0.08960370)0.987000:0.16170400,(SRX1323887_E_003_A_1:0.12630051,((OK212_J_001_A_1:0.16272224,(OK213_E_003_A_1:0.00000001,OK193_E_001_A_1:0.00000002)0.544000:0.01624508)0.971000:0.28410854,(CebrOK014_E_002_A_1:0.00000002,(CebrOK016_E_001_A_1:0.00000002,CebrOK033_J_001_A_1:0.00000002)0.000000:0.00000002)0.819000:0.07983708)0.195000:0.07284897)0.753000:0.02894497)0.000000:0.00000002)0.000000:0.00000002,(OK213_E_001_A_1:0.16226423,((SRX1323887_E_004_A_1:0.14598337,(SRX1323887_E_002_A_1:0.00000002,SRX1323887_E_001_A_1:0.02162769)0.770000:0.07385747)0.938000:0.19359252,OK006_E_001_A_1:0.02472635)0.000000:0.00000002)0.790000:0.02050596)0.981000:0.12682741)0.786000:0.02529988,OK006_E_002_A_1:0.00000002)0.000000:0.00000001)0.891000:0.38532932,(((SRX1323887_E_023_Con_ikot_ikot_4:0.00000003,(OK006_E_262_Tpra06:0.00000002,(((OK193_E_208_Cver06:0.00000002,(OK212_J_251_Cver06:0.00000002,(SRX1323887_E_189_Cver06:0.00000002,OK214_J_256_Cver06:0.00000002)0.000000:0.00000002)0.000000:0.00000002)0.000000:0.00000001,(OK193_E_207_Cver06:0.00000002,(OK006_E_226_Cver06:0.00000002,(OK006_E_225_Cver06:0.00000002,CebrOK035_J_293_Cver06:0.00000002)0.000000:0.00000002)0.000000:0.00000002)0.000000:0.00000001)0.998000:2.20236207,(CebrOK014_E_132_Tpra06:0.00000002,(CebrOK033_J_231_Tpra06:0.00000002,(CebrOK035_J_330_Tpra06:0.00000002,(CebrOK035_J_331_Tpra06:0.00000002,(CebrOK035_J_332_Tpra06:0.00000002,(OK005_J_289_Tpra06:0.00000002,(OK006_E_261_Tpra06:0.00000002,(OK193_E_235_Tpra06:0.00000002,(OK193_E_236_Tpra06:0.00000002,(OK212_J_273_Tpra06:0.00000002,(OK212_J_274_Tpra06:0.00000002,(OK213_E_279_Tpra06:0.00000002,(OK213_E_280_Tpra06:0.00000002,(OK213_E_281_Tpra06:0.00000002,(OK214_J_289_Tpra06:0.00000002,(OK214_J_290_Tpra06:0.00000002,(OK214_J_292_Tpra06:0.00000002,(OK214_J_293_Tpra06:0.00000002,(OK214_J_295_Tpra06:0.00000002,(SRX1323887_E_218_Tpra06:0.00000002,SRX1323887_E_219_Tpra06:0.00000002)0.000000:0.00000002)0.000000:0.00000002)0.000000:0.00000002)0.000000:0.00000002)0.000000:0.00000002)0.000000:0.00000002)0.000000:0.00000002)0.000000:0.00000002)0.000000:0.00000002)0.000000:0.00000002)0.000000:0.00000002)0.000000:0.00000002)0.000000:0.00000002)0.000000:0.00000002)0.000000:0.00000002)0.000000:0.00000002)0.000000:0.00000002)0.000000:0.00000002)0.000000:0.00000002)0.000000:0.00000001)0.486000:0.10176803)1.000000:2.95780086)0.424000:0.13688380,((OK193_E_022_Con_ikot_ikot_2:0.03205864,(CebrOK014_E_007_Conikotikot_2:0.00000002,(CebrOK016_E_010_Con_ikot_ikot_2:0.00000002,(OK005_J_017_Con_ikot_ikot_2:0.00000002,(OK006_E_018_Con_ikot_ikot_2:0.00000002,(SRX1323887_E_020_Con_ikot_ikot_2:0.00000002,OK213_E_022_Con_ikot_ikot_2:0.00000002)0.000000:0.00000002)0.000000:0.00000002)0.000000:0.00000002)0.000000:0.00000002)0.000000:0.00000002)0.846000:0.07984219,(OK006_E_020_Con_ikot_ikot_2:0.03094779,(CebrOK033_J_013_Con_ikot_ikot_2:0.00000002,(CebrOK035_J_027_Con_ikot_ikot_2:0.00000002,(OK005_J_016_Con_ikot_ikot_2:0.00000002,(OK212_J_019_Con_ikot_ikot_2:0.00000002,(OK212_J_020_Con_ikot_ikot_2:0.00000002,(OK214_J_015_Con_ikot_ikot_2:0.00000002,OK214_J_013_Con_ikot_ikot_2:0.00000002)0.000000:0.00000002)0.000000:0.00000002)0.000000:0.00000002)0.000000:0.00000002)0.000000:0.00000002)0.000000:0.00000002)0.596000:0.01905326)0.945000:0.26488782)0.552000:0.20493270,(CebrOK033_J_014_Con_ikot_ikot_4:0.00000002,((OK006_E_021_Con_ikot_ikot_4:0.00000001,((OK006_E_022_Con_ikot_ikot_4:0.00000002,(OK193_E_023_Con_ikot_ikot_4:0.00000002,(SRX1323887_E_022_Con_ikot_ikot_4:0.00000002,OK213_E_025_Con_ikot_ikot_4:0.00000002)0.000000:0.00000002)0.000000:0.00000002)0.000000:0.00000002,(CebrOK033_J_017_Con_ikot_ikot_4:0.00000002,(CebrOK035_J_031_Con_ikot_ikot_4:0.00000002,(OK212_J_022_Con_ikot_ikot_4:0.00000002,(OK214_J_017_Con_ikot_ikot_4:0.00000002,OK214_J_018_Con_ikot_ikot_4:0.00000002)0.000000:0.00000002)0.000000:0.00000002)0.000000:0.00000002)0.921000:0.06141929)0.000000:0.00000001)0.926000:0.02918660,(CebrOK033_J_015_Con_ikot_ikot_4:0.00000002,(OK005_J_018_Con_ikot_ikot_4:0.00000002,(OK214_J_016_Con_ikot_ikot_4:0.00000002,OK212_J_021_Con_ikot_ikot_4:0.00000002)0.000000:0.00000002)0.000000:0.00000002)0.000000:0.00000002)0.000000:0.00000002)0.573000:0.06632518)0.973000:0.70902952)0.807000:0.32013249)0.758000:0.20087103,(OK212_J_024_Con_ikot_ikot_6:0.92237763,(OK005_J_252_Cerm08:0.00000002,(OK213_E_242_Cerm08:0.00000002,((((CebrOK033_J_198_Cerm08:0.00000002,(CebrOK035_J_279_Cerm08:0.00000002,CebrOK035_J_280_Cerm08:0.00000002)0.000000:0.00000002)0.000000:0.00000002,CebrOK035_J_278_Cerm08:0.06755900)0.000000:0.00000002,((OK212_J_241_Cerm08:0.17486228,(CebrOK033_J_197_Cerm08:0.00000002,(CebrOK035_J_277_Cerm08:0.00000002,OK212_J_239_Cerm08:0.00000002)0.000000:0.00000002)0.000000:0.00000002)0.882000:0.11452135,(OK213_E_241_Cerm08:0.00000002,(OK214_J_247_Cerm08:0.00000002,OK214_J_248_Cerm08:0.00000002)0.000000:0.00000002)0.000000:0.00000002)0.833000:0.11307289)0.000000:0.00000003,(OK193_E_201_Cerm08:0.06869262,(CebrOK033_J_196_Cerm08:0.00000002,(CebrOK035_J_276_Cerm08:0.00000002,(OK006_E_213_Cerm08:0.00000002,(OK193_E_200_Cerm08:0.00000002,(OK212_J_240_Cerm08:0.00000002,(OK214_J_246_Cerm08:0.00000002,OK212_J_242_Cerm08:0.00000002)0.000000:0.00000002)0.000000:0.00000002)0.000000:0.00000002)0.000000:0.00000002)0.000000:0.00000002)0.000000:0.00000002)0.789000:0.06328563)0.892000:0.12785024)0.000000:0.00000002)0.883000:0.79728980)0.834000:0.48469381)0.918000:0.74061614,((OK212_J_080_L:0.00000002,(OK212_J_018_C:0.00000002,(OK214_J_012_C:0.01795972,((CebrOK035_J_025_C:0.00000002,SRX1323887_E_019_C:0.02022815)0.898000:0.03601653,(OK213_E_020_C:0.00000002,((OK193_E_020_C:0.00000002,(OK193_E_021_C:0.00000002,(OK006_E_017_C:0.00000002,OK193_E_019_C:0.00000002)0.000000:0.00000003)0.000000:0.01831997)0.905000:0.03687573,(OK213_E_021_C:0.00000002,(CebrOK035_J_026_C:0.31890213,(CebrOK016_E_009_C:0.00000002,OK005_J_015_C:0.00000002)0.000000:0.00000002)0.741000:0.02535159)0.000000:0.00000002)0.919000:0.07571089)0.000000:0.00000002)0.982000:0.09676596)0.000000:0.00000002)0.994000:2.07495908)0.898000:0.79216279,(CebrOK016_E_022_I1_3:0.17698256,((((CebrOK033_J_038_I1_1:0.00000002,(CebrOK033_J_039_I1_1:0.00000002,(CebrOK035_J_049_I1_1:0.00000002,(OK005_J_042_I1_1:0.00000002,(OK006_E_056_I1_1:0.00000002,(OK214_J_054_I1_1:0.00000002,OK006_E_057_I1_1:0.00000002)0.000000:0.00000002)0.000000:0.00000002)0.000000:0.00000002)0.000000:0.00000002)0.000000:0.00000002)0.771000:0.02637173,((OK212_J_050_I1_1:0.00000002,OK212_J_051_I1_1:0.00000002)0.850000:0.02657508,(CebrOK014_E_015_I1_1:0.00000002,(OK193_E_044_I1_1:0.00000002,(OK213_E_051_I1_1:0.00000002,SRX1323887_E_041_I1_1:0.00000002)0.000000:0.00000002)0.000000:0.00000002)0.000000:0.00000002)0.821000:0.02650228)0.781000:0.02626416,(OK214_J_055_I1_1:0.00000002,(((CebrOK035_J_062_I3:0.08442003,(OK006_E_068_I3:0.02625641,((OK214_J_067_I3:0.03098492,(SRX1323887_E_031_Divergent_MKLCVVIVLL:1.60649086,(OK212_J_074_I3:0.00000001,OK212_J_073_I3:0.00000002)0.000000:0.00000002)0.742000:0.02676484)0.000000:0.00000002,(CebrOK035_J_060_I3:0.00000002,(CebrOK033_J_049_I3:0.02658588,(CebrOK014_E_023_I3:0.00000002,(CebrOK016_E_027_I3:0.00000002,(OK006_E_067_I3:0.00000002,(OK213_E_066_I3:0.00000002,SRX1323887_E_049_I3:0.00000002)0.000000:0.00000002)0.000000:0.00000002)0.000000:0.00000002)0.922000:0.05819513)0.000000:0.00000002)0.000000:0.00000002)0.791000:0.02673793)0.768000:0.02580498)0.796000:0.02632423,((CebrOK033_J_048_I3:0.00000002,CebrOK035_J_059_I3:0.00000002)0.860000:0.02644169,(OK005_J_056_I3:0.05294919,((OK193_E_048_I3:0.00000002,OK005_J_055_I3:0.00000002)0.000000:0.00000002,((OK193_E_047_I3:0.00000002,(SRX1323887_E_048_I3:0.00000002,OK213_E_065_I3:0.00000002)0.000000:0.00000002)0.000000:0.00000002,(OK193_E_050_I3:0.02844047,(CebrOK014_E_024_I3:0.00000002,(OK006_E_069_I3:0.00000002,CebrOK016_E_028_I3:0.00000002)0.000000:0.00000002)0.811000:0.02788462)0.790000:0.02824852)0.928000:0.02608690)0.000000:0.00000002)0.816000:0.02601727)0.000000:0.00000002)0.897000:0.05721343,(OK214_J_066_I3:0.00000002,OK212_J_072_I3:0.00000002)0.000000:0.00000002)1.000000:0.91910384)0.000000:0.00000002)0.954000:0.56233459,(CebrOK035_J_054_I1_2:0.04691468,((OK213_E_055_I1_2:0.00000002,OK213_E_056_I1_2:0.00000002)0.836000:0.07078516,(CebrOK016_E_020_I1_2:0.00000002,((OK213_E_054_I1_2:0.00000002,CebrOK016_E_021_I1_2:0.00000002)0.000000:0.00000002,((CebrOK014_E_016_I1_2:0.00000002,(CebrOK016_E_019_I1_2:0.00000002,(OK212_J_054_I1_2:0.00000002,((CebrOK035_J_052_I1_2:0.00000002,(OK005_J_046_I1_2:0.00000002,(OK006_E_059_I1_2:0.00000002,(OK212_J_053_I1_2:0.00000002,(OK213_E_052_I1_2:0.00000002,(SRX1323887_E_042_I1_2:0.00000002,(CebrOK016_E_018_I1_2:0.00000002,(CebrOK035_J_051_I1_2:0.00000002,(CebrOK035_J_053_I1_2:0.00000002,(OK212_J_052_I1_2:0.00000002,OK005_J_044_I1_2:0.00000002)0.000000:0.00000002)0.000000:0.00000002)0.000000:0.00000002)0.000000:0.00000002)0.000000:0.00000002)0.000000:0.00000002)0.000000:0.00000002)0.000000:0.00000002)0.000000:0.00000002)0.000000:0.00000002,(CebrOK033_J_041_I1_2:0.00000002,(OK214_J_058_I1_2:0.00000002,(CebrOK033_J_040_I1_2:0.00000002,(OK005_J_045_I1_2:0.00000002,OK214_J_057_I1_2:0.00000002)0.000000:0.00000002)0.000000:0.00000002)0.000000:0.00000002)0.736000:0.03217764)0.767000:0.03219468)0.845000:0.03217972)0.000000:0.00000002)0.000000:0.00000002,(CebrOK014_E_017_I1_2:0.00959140,(OK005_J_047_I1_2:0.00000002,OK213_E_053_I1_2:0.00000002)0.792000:0.05878116)0.000000:0.04134036)0.881000:0.04839857)0.000000:0.00000002)0.759000:0.03185740)0.769000:0.05364761)0.898000:0.39611618)0.826000:0.36370905)0.904000:0.67505351)0.815000:0.45751699)0.000000:0.04132998)0.850000:0.27985151,((((SRX1323887_E_180_Cerm03_5:0.63241228,SRX1323887_E_179_Cerm03_5:0.23959762)0.678000:0.10277415,((SRX1323887_E_178_Cerm03_5:0.00000002,SRX1323887_E_177_Cerm03_5:0.00000002)0.975000:0.17012217,(OK214_J_232_Cerm03_5:0.02027283,(OK214_J_233_Cerm03_5:0.00000002,OK006_E_203_Cerm03_5:0.00000002)0.000000:0.00000002)0.859000:0.08363688)0.903000:0.10620979)0.560000:0.05071189,(OK006_E_202_Cerm03_5:0.00000002,(((CebrOK014_E_111_Cerm03_5:0.00000002,(OK213_E_235_Cerm03_5:0.00000002,OK193_E_194_Cerm03_5:0.00000002)0.000000:0.00000002)0.976000:0.06222513,(CebrOK035_J_267_Cerm03_5:0.00000002,OK006_E_201_Cerm03_5:0.00000002)0.000000:0.00000002)0.000000:0.00000002,(((OK005_J_222_Cerm03_5:0.04078031,((OK006_E_200_Cerm03_5:0.00000002,OK214_J_228_Cerm03_5:0.00000002)0.000000:0.00000002,(OK214_J_231_Cerm03_5:0.07102230,OK214_J_230_Cerm03_5:0.08624235)0.000000:0.00000002)0.000000:0.00000002)0.835000:0.02022153,((CebrOK016_E_124_Cerm03_5:0.00000002,(CebrOK033_J_187_Cerm03_5:0.00000002,(CebrOK035_J_266_Cerm03_5:0.00000002,(OK005_J_217_Cerm03_5:0.00000002,(OK005_J_218_Cerm03_5:0.00000002,(OK212_J_215_Cerm03_5:0.00000002,OK213_E_234_Cerm03_5:0.00000002)0.000000:0.00000002)0.000000:0.00000002)0.000000:0.00000002)0.000000:0.00000002)0.000000:0.00000002)0.000000:0.00000002,(((OK005_J_223_Cerm03_5:0.06363968,OK212_J_218_Cerm03_5:0.00344900)0.783000:0.03884880,(OK212_J_217_Cerm03_5:0.04149785,OK212_J_221_Cerm03_5:0.10828929)0.000000:0.00000002)0.000000:0.00000002,(OK005_J_221_Cerm03_5:0.08363722,(OK005_J_226_Cerm03_5:0.07447484,((CebrOK014_E_110_Cerm03_5:0.06228933,OK212_J_226_Cerm03_5:0.11605030)0.000000:0.00000002,(OK005_J_228_Cerm03_5:0.11352372,OK005_J_225_Cerm03_5:0.05706438)0.777000:0.03126023)0.000000:0.00000002)0.000000:0.00000002)0.000000:0.00000002)0.000000:0.00000002)0.000000:0.00000002)0.000000:0.00000002,(CebrOK033_J_188_Cerm03_5:0.13540839,(OK214_J_229_Cerm03_5:0.06191385,OK005_J_224_Cerm03_5:0.06338778)0.000000:0.00000002)0.805000:0.02064861)0.957000:0.06577686)0.842000:0.02050699)0.787000:0.06312031)0.930000:0.42572445,((((OK212_J_236_Cerm03_7:0.00000002,(OK214_J_243_Cerm03_7:0.00000002,CebrOK035_J_275_Cerm03_7:0.00000002)0.815000:0.02043484)0.934000:0.20850449,((OK005_J_214_Cerm03_1:0.02087413,(CebrOK033_J_182_Cerm03_1:0.00000002,(CebrOK035_J_262_Cerm03_1:0.00000002,(OK193_E_188_Cerm03_1:0.00000002,(OK214_J_222_Cerm03_1:0.00000002,OK212_J_211_Cerm03_1:0.00000002)0.000000:0.00000002)0.000000:0.00000002)0.000000:0.00000002)0.000000:0.00000002)0.000000:0.00000002,(OK213_E_230_Cerm03_1:0.00000002,SRX1323887_E_174_Cerm03_1:0.02107133)0.803000:0.02108710)0.776000:0.07672331)0.928000:0.53181779,((OK193_E_190_Cerm03_2:0.00000002,(SRX1323887_E_175_Cerm03_2:0.00000002,((CebrOK033_J_183_Cerm03_2:0.00000002,(CebrOK035_J_263_Cerm03_2:0.00000002,(OK214_J_223_Cerm03_2:0.00000002,OK005_J_215_Cerm03_2:0.00000002)0.000000:0.00000002)0.000000:0.00000002)0.000000:0.00000002,(OK213_E_231_Cerm03_2:0.02656409,(OK193_E_189_Cerm03_2:0.00000002,OK193_E_191_Cerm03_2:0.00000002)0.000000:0.00000002)0.876000:0.02598111)0.832000:0.02593531)0.830000:0.02622955)0.981000:0.80717309,(((((CebrOK035_J_270_Cerm03_6:0.00000002,(CebrOK035_J_272_Cerm03_6:0.00000002,CebrOK035_J_271_Cerm03_6:0.00000002)0.000000:0.00000002)0.763000:0.02001088,(((OK005_J_240_Cerm03_6:0.04158542,(CebrOK033_J_192_Cerm03_6:0.00000002,(OK005_J_234_Cerm03_6:0.00000002,(OK006_E_205_Cerm03_6:0.00000002,(OK006_E_206_Cerm03_6:0.00000002,OK006_E_207_Cerm03_6:0.00000002)0.000000:0.00000002)0.000000:0.00000002)0.000000:0.00000002)0.000000:0.00000002)0.000000:0.00000002,((OK005_J_236_Cerm03_6:0.02060913,(OK005_J_235_Cerm03_6:0.00000002,OK005_J_238_Cerm03_6:0.00000002)0.816000:0.02184864)0.747000:0.02055518,((CebrOK033_J_193_Cerm03_6:0.02056969,((OK212_J_228_Cerm03_6:0.00000002,(OK212_J_229_Cerm03_6:0.00000002,(OK212_J_230_Cerm03_6:0.00000002,OK212_J_231_Cerm03_6:0.00000002)0.000000:0.00000002)0.000000:0.00000002)0.912000:0.02038464,(CebrOK014_E_112_Cerm03_6:0.00000002,(CebrOK014_E_113_Cerm03_6:0.00000002,(CebrOK016_E_125_Cerm03_6:0.00000002,(CebrOK016_E_126_Cerm03_6:0.00000002,(CebrOK033_J_191_Cerm03_6:0.00000002,(OK005_J_231_Cerm03_6:0.00000002,(OK005_J_232_Cerm03_6:0.00000002,(OK005_J_233_Cerm03_6:0.00000002,(OK214_J_236_Cerm03_6:0.00000002,OK005_J_237_Cerm03_6:0.00000002)0.000000:0.00000002)0.000000:0.00000002)0.000000:0.00000002)0.000000:0.00000002)0.000000:0.00000002)0.000000:0.00000002)0.000000:0.00000002)0.000000:0.00000002)0.000000:0.00000002)0.000000:0.00000002)0.000000:0.00000002,(OK005_J_243_Cerm03_6:0.08566310,OK005_J_244_Cerm03_6:0.06275224)0.000000:0.00000002)0.775000:0.02042562)0.000000:0.00000002)0.000000:0.00000002,(OK214_J_241_Cerm03_6:0.06261015,(OK212_J_232_Cerm03_6:0.06383526,(OK214_J_238_Cerm03_6:0.00000002,(OK214_J_240_Cerm03_6:0.04113606,OK214_J_239_Cerm03_6:0.00000002)0.955000:0.06311778)0.000000:0.01179428)0.000000:0.00995401)0.000000:0.00000001)0.768000:0.02093083)0.732000:0.02133961,(CebrOK035_J_273_Cerm03_6:0.04107183,(CebrOK035_J_274_Cerm03_6:0.02055659,((CebrOK033_J_190_Cerm03_6:0.00000002,(OK213_E_236_Cerm03_6:0.00000002,(OK213_E_237_Cerm03_6:0.00000002,OK213_E_238_Cerm03_6:0.00000002)0.000000:0.00000002)0.000000:0.00000002)0.000000:0.00000002,(OK214_J_235_Cerm03_6:0.04174459,OK214_J_234_Cerm03_6:0.00000002)0.833000:0.02048985)0.817000:0.02061546)0.000000:0.00000002)0.750000:0.02074397)0.795000:0.18056159,((OK006_E_204_Cerm03_6:0.00000002,OK005_J_230_Cerm03_6:0.00000002)0.000000:0.00000002,((CebrOK035_J_268_Cerm03_6:0.02074053,OK212_J_227_Cerm03_6:0.00000002)0.364000:0.02048350,CebrOK033_J_189_Cerm03_6:0.02036932)0.000000:0.00000002)0.876000:0.30068721)0.989000:0.88091961,(CebrOK033_J_185_Cerm03_3:0.07354419,((OK213_E_233_Cerm03_3:0.00000002,OK193_E_193_Cerm03_3:0.00000002)0.761000:0.03185602,(OK212_J_213_Cerm03_3:0.00000002,((CebrOK033_J_184_Cerm03_3:0.00000002,(CebrOK035_J_264_Cerm03_3:0.00000002,(OK005_J_216_Cerm03_3:0.00000002,(OK212_J_212_Cerm03_3:0.00000002,OK214_J_224_Cerm03_3:0.00000002)0.000000:0.00000002)0.000000:0.00000002)0.000000:0.00000002)0.000000:0.00000002,(OK213_E_232_Cerm03_3:0.02145203,(CebrOK014_E_109_Cerm03_3:0.00000002,(OK006_E_198_Cerm03_3:0.00000002,(OK006_E_199_Cerm03_3:0.00000002,(SRX1323887_E_176_Cerm03_3:0.00000002,OK193_E_192_Cerm03_3:0.00000002)0.000000:0.00000002)0.000000:0.00000002)0.000000:0.00000002)0.000000:0.00000002)0.926000:0.04332006)0.843000:0.02087388)0.579000:0.01169322)0.809000:0.06253017)0.879000:0.28835973)0.000000:0.00000003)0.855000:0.46050641)0.000000:0.05515774,CebrOK035_J_115_M_5:0.90484728)0.713000:0.32738833)0.804000:0.21802147)0.714000:0.20540489)0.645000:0.20676341)0.672000:0.17468589)0.838000:0.29024888)0.000000:0.09428330)0.000000:0.13207709,((SRX1323887_E_187_Cver03:0.08959922,(OK212_J_248_Cver03:0.16040207,SRX1323887_E_188_Cver03:0.13914266)0.705000:0.11901373)0.907000:0.45003015,(OK193_E_115_M_5:0.00000001,((OK213_E_132_M_5:0.00000002,(CebrOK016_E_063_M_5:0.00000002,(SRX1323887_E_087_M_5:0.00000002,OK213_E_133_M_5:0.00000002)0.000000:0.00000002)0.922000:0.02141260)0.000000:0.00000002,CebrOK014_E_056_M_5:0.00000002)0.000000:0.00000001)0.962000:0.65628182)0.937000:0.51049278)0.578000:0.03538407)0.737000:0.08371849)0.926000:0.29036832,((CebrOK035_J_219_Q_2:0.00000002,(SRX1323887_E_144_Q_2:0.02223785,OK193_E_167_Q_2:0.04462016)0.785000:0.04516803)1.000000:1.27101701,(OK193_E_120_N_2:0.00000002,((OK212_J_136_N_2:0.00000002,(((OK214_J_120_N_2:0.00000002,OK214_J_121_N_2:0.00000002)0.809000:0.01742700,(OK005_J_107_N_2:0.00000002,(CebrOK033_J_086_N_2:0.00000002,CebrOK033_J_087_N_2:0.00000002)0.922000:0.03557773)0.799000:0.01765524)0.816000:0.01773551,(OK212_J_135_N_2:0.02094066,(CebrOK035_J_119_N_2:0.10247272,SRX1323887_E_091_N_2:0.18556162)0.835000:0.05256412)0.775000:0.01811095)0.000000:0.00000002)0.912000:0.01761871,(CebrOK035_J_118_N_2:0.05256298,(SRX1323887_E_089_N_2:0.00000002,SRX1323887_E_090_N_2:0.00000002)0.000000:0.00000002)0.000000:0.00000001)0.000000:0.00000001)0.570000:0.03720213)0.000000:0.11303347)0.943000:0.36242536,((OK214_J_194_Q_3:0.00000002,((OK214_J_195_Q_3:0.00000002,CebrOK033_J_155_Q_3:0.00000002)0.806000:0.02564186,(SRX1323887_E_145_Q_3:0.00000002,OK213_E_205_Q_3:0.00000002)0.948000:0.08369840)0.772000:0.02587889)0.610000:0.03627122,((OK214_J_196_Q_3:0.00000002,(OK212_J_191_Q_3:0.00000002,CebrOK035_J_220_Q_3:0.00000002)0.834000:0.02644208)0.876000:0.05526032,(CebrOK014_E_096_Q_3:0.00000002,(CebrOK016_E_109_Q_3:0.00000002,(OK005_J_186_Q_3:0.00000002,(OK193_E_168_Q_3:0.00000002,(SRX1323887_E_146_Q_3:0.00000002,OK213_E_206_Q_3:0.00000002)0.000000:0.00000002)0.000000:0.00000002)0.000000:0.00000002)0.000000:0.00000002)0.000000:0.00000002)0.953000:0.26504226)0.810000:0.23510360)0.605000:0.06344633)0.516000:0.15353219)0.942000:0.34314897,(CebrOK035_J_216_Q_1a:0.00000002,(CebrOK035_J_217_Q_1a:0.00000002,(OK212_J_188_Q_1a:0.00000002,(OK212_J_189_Q_1a:0.00000002,(OK214_J_191_Q_1a:0.00000002,OK214_J_190_Q_1a:0.00000002)0.000000:0.00000002)0.000000:0.00000002)0.000000:0.00000002)0.000000:0.00000002)0.000000:0.00000002)0.825000:0.01948534)0.741000:0.02332306)0.863000:0.07707918)0.000000:0.00000002)0.858000:0.02345309)0.780000:0.01824120)0.785000:0.01871721)0.000000:0.00000001)1.000000:2.01465928,((((CebrOK014_E_128_SF-mi2:0.00000002,(CebrOK016_E_136_SF-mi2:0.00000002,(CebrOK016_E_137_SF-mi2:0.00000002,(OK005_J_283_SF-mi2:0.00000002,(OK006_E_244_SF-mi2:0.00000002,(OK006_E_247_SF-mi2:0.00000002,(OK193_E_227_SF-mi2:0.00000002,(OK212_J_270_SF-mi2:0.00000002,(OK213_E_272_SF-mi2:0.00000002,(OK213_E_273_SF-mi2:0.00000002,(OK213_E_274_SF-mi2:0.00000002,(OK214_J_282_SF-mi2:0.00000002,SRX1323887_E_211_SF-mi2:0.00000002)0.000000:0.00000002)0.000000:0.00000002)0.000000:0.00000002)0.000000:0.00000002)0.000000:0.00000002)0.000000:0.00000002)0.000000:0.00000002)0.000000:0.00000002)0.000000:0.00000002)0.000000:0.00000002)0.000000:0.00000002)0.000000:0.00000002,(OK006_E_245_SF-mi2:0.03724649,OK006_E_249_SF-mi2:0.07566379)0.787000:0.03691640)0.000000:0.00000003,(OK006_E_252_SF-mi2:0.06513327,CebrOK014_E_127_SF-mi2:0.00000002)0.000000:0.00000002)0.000000:0.07704803,((OK212_J_271_SF-mi2:0.00000002,CebrOK033_J_227_SF-mi2:0.00000002)0.831000:0.03577509,(CebrOK035_J_322_SF-mi2:0.00000002,(OK005_J_284_SF-mi2:0.00000002,(OK214_J_283_SF-mi2:0.00000002,OK005_J_285_SF-mi2:0.00000002)0.000000:0.00000002)0.000000:0.00000002)0.000000:0.00000002)0.925000:0.11202895)0.000000:0.00000002)0.695000:0.03825659,(OK193_E_231_SF-mi2:0.07639413,((OK214_J_285_SF-mi2:0.00000002,OK005_J_286_SF-mi2:0.00000002)0.918000:0.03797380,(CebrOK033_J_228_SF-mi2:0.00000002,(OK214_J_284_SF-mi2:0.00000002,CebrOK035_J_323_SF-mi2:0.00000002)0.000000:0.00000002)0.000000:0.00000002)0.000000:0.00000002)0.877000:0.08980316)0.964000:0.33980204,((CebrOK035_J_324_SF-mi2:0.03705402,(CebrOK014_E_129_SF-mi2:0.00000002,(OK006_E_255_SF-mi2:0.00000002,(OK193_E_232_SF-mi2:0.00000002,(SRX1323887_E_212_SF-mi2:0.00000002,(SRX1323887_E_213_SF-mi2:0.00000002,SRX1323887_E_214_SF-mi2:0.00000002)0.000000:0.00000002)0.000000:0.00000002)0.000000:0.00000002)0.000000:0.00000002)0.554000:0.02003078)0.939000:0.26200393,((CebrOK016_E_121_Cerm01:0.00000002,(OK213_E_227_Cerm01:0.00000002,(CebrOK033_J_180_Cerm01:0.00000002,(CebrOK035_J_260_Cerm01:0.00000002,(OK005_J_212_:0.00000002,(OK214_J_221_Cerm01:0.00000002,OK212_J_209_Cerm01:0.00000002)0.000000:0.00000002)0.000000:0.00000002)0.000000:0.00000002)0.971000:0.10206441)0.000000:0.00000002)0.952000:0.66659105,((((((CebrOK033_J_005_B1:0.00000002,CebrOK033_J_007_B1:0.00000002)0.895000:0.10033351,(OK005_J_003_B1:0.00000002,(OK005_J_004_B1:0.00000002,(OK005_J_005_B1:0.00000002,(OK005_J_007_B1:0.00000002,OK005_J_006_B1:0.00000002)0.000000:0.00000002)0.000000:0.00000002)0.000000:0.00000002)0.000000:0.00000002)0.680000:0.15667120,(CebrOK016_E_003_B1:0.00000003,OK005_J_008_B1:0.15636210)0.000000:0.10276607)0.000000:0.00000002,((CebrOK014_E_003_B1:0.00000002,(CebrOK033_J_008_B1:0.00000002,(OK006_E_005_B1:0.00000002,(OK006_E_006_B1:0.00000002,(OK006_E_007_B1:0.00000002,(OK006_E_008_B1:0.00000002,(OK193_E_008_B1:0.00000002,(OK212_J_008_B1:0.00000002,(OK212_J_009_B1:0.00000002,(OK212_J_010_B1:0.00000002,(OK212_J_011_B1:0.00000002,(OK213_E_008_B1:0.00000002,(OK213_E_009_B1:0.00000002,(OK213_E_010_B1:0.00000002,(OK214_J_004_B1:0.00000002,(SRX1323887_E_010_B1:0.00000002,OK214_J_005_B1:0.00000002)0.000000:0.00000002)0.000000:0.00000002)0.000000:0.00000002)0.000000:0.00000002)0.000000:0.00000002)0.000000:0.00000002)0.000000:0.00000002)0.000000:0.00000002)0.000000:0.00000002)0.000000:0.00000002)0.000000:0.00000002)0.000000:0.00000002)0.000000:0.00000002)0.000000:0.00000002)0.000000:0.00000002)0.000000:0.00000002,(CebrOK035_J_007_B1:0.00000002,CebrOK035_J_008_B1:0.00000002)0.908000:0.05546134)0.000000:0.00000002)0.983000:2.54923134,(OK005_J_213_Cerm02_02:0.00000001,(OK213_E_229_Cerm02_02:0.00000002,(CebrOK035_J_261_Cerm02_2:0.00000002,CebrOK033_J_181_Cerm02_2:0.00000002)0.000000:0.00000002)0.000000:0.00000001)0.743000:0.29349865)0.558000:0.65911879,(OK212_J_202_U_1a:0.00000002,((((OK213_E_223_U_2:0.00000002,(CebrOK014_E_107_U_2:0.00000002,(CebrOK033_J_177_U_2:0.00000002,CebrOK016_E_118_U_2:0.00000002)0.000000:0.00000002)0.925000:0.02600422)0.000000:0.00000002,(OK213_E_224_U_2:0.00000002,(OK193_E_185_U_1b:0.00000002,OK213_E_222_U_1b:0.00000002)0.982000:0.16596003)0.354000:0.02600302)0.995000:0.48642331,((CebrOK014_E_106_U_1a:0.00000002,(SRX1323887_E_165_U_1a:0.00000002,OK193_E_184_U_1a:0.00000002)0.000000:0.00000002)0.765000:0.04427697,(CebrOK035_J_252_U_1a:0.00000002,SRX1323887_E_166_U_1a:0.23908016)0.932000:0.13744724)0.632000:0.03163977)0.828000:0.09251565,(OK214_J_216_U_1a:0.00000002,((CebrOK035_J_250_U_1a:0.00000002,(CebrOK035_J_253_U_1a:0.00000002,(OK005_J_208_U_1a:0.00000002,(OK214_J_217_U_1a:0.00000002,OK212_J_203_U_1a:0.00000002)0.000000:0.00000002)0.000000:0.00000002)0.000000:0.00000002)0.991000:0.15963990,OK005_J_207_U_1a:0.00000002)0.000000:0.00000002)0.756000:0.03756312)0.926000:0.08484077)0.838000:0.46558575)0.641000:0.31964334)0.894000:0.58769187)0.000000:0.00000002)0.193000:0.08428004)0.859000:0.18318640)0.903000:1.32897243)0.674000:0.40351656,(OK214_J_257_Cver07:3.27872559,(OK212_J_238_Cerm08:0.00000002,OK005_J_250_Cerm08:0.00000002)0.507000:0.58378093)0.654000:0.97289511)0.898000:1.28870504);
