# Supplementary material for: Comparative Venomics of the Cryptic Cone Snail Species Virroconus ebraeus and Virroconus judaeus
Source: Mar Drugs. 2022 Feb 17;20(2):149. doi: 10.3390/md20020149 (PMC8875821; doi:10.3390/md20020149)
Supplement: Supplementary file 1 [file marinedrugs-20-00149-s001.zip › Supplementary File S4.xlsx]

## Sheet: V. ebraeus
RT(min)	Peak mass	Peptide mass	Mass error	Peptide name	Peptide sequence	Peptide PTMs
0.654	3070.14	3070.14	0.0016	OK006_E_244_Sf-mi2	TCTGNCRLCGAICCC(Gla)PKVCRNNQCIDD	Glu>Gla (x1)
0.969	3026.16	3026.15	0.0125	OK006_E_244_Sf-mi2	TCTGNCRLCGAICCCEPKVCRNNQCIDD
1.895	2066.82	2066.8	0.021	OK006_E_198_Cerm03	GKCGDRCPSGICN(hVa)DGTCRD	Val>hVA (x1)
1.895	2066.82	2066.8	0.021	OK006_E_198_Cerm03	GKCGDRCOSGICNVDGTCRD	Pro>Hyp (x1)
3.353	3504.43	3504.42	0.006	SRX1323887_E_137_P	(Gla)SSSLVLCRSPCSAVRFCPPTCSYC(Gla)GTPQIC	Glu>Gla (x2)
3.684	3256.35	3256.31	0.0404	OK006_E_207_Cerm03	FCONOCQSCOSOG(Gla)C(hVa)RPYTGHTFFLHL	Glu>Gla (x1);Pro>Hyp (x4);Val>hVA (x1)
3.684	3256.35	3256.31	0.0404	OK006_E_207_Cerm03	FCONOCQSCOSOG(Gla)CVROYTGHTFFLHL	Glu>Gla (x1);Pro>Hyp (x5)
3.718	3499.41	3499.38	0.0275	CebrOK035_J_158_O1	DCH(Gla)SG(Gla)FCGIPGVKNGLCCSQSCALFCTPKW(Nh2)	[free end]>amidation (x1);Glu>Gla (x2)
3.718	1834.66	1834.67	0.0075	OK005_J_199_T	RCCOOEIWCCGFQHE	Pro>Hyp (x2)
3.718	3461.42	3461.43	0.001	OK006_E_178_P	(Gla)GGTL(hVa)LCRSOCSA(hVa)RFCPPTCSYCEGTPQIC(Nh2)	[free end]>amidation (x1);Glu>Gla (x1);Pro>Hyp (x1);Val>hVA (x2)
3.753	5247.26	5247.24	0.0235	OK005_J_062_K	HOCDES(hVa)KACYGWCLELOYLRDDICCRFVDSIODLODGECEKLET(Nh2)	[free end]>amidation (x1);Pro>Hyp (x4);Val>hVA (x1)
3.753	4197.81	4197.82	0.0145	SRX1323887_E_083_M	SCKWNOLCDOPS(Gla)RMTAFTANNAAL(Gla)LPYSGL(hVa)AP(Gla)Q	Glu>Gla (x3);Pro>Hyp (x2);Val>hVA (x1)
3.787	4404.72	4404.76	0.042	OK005_J_056_I3	TONCEQIGGSCSGSEGCCGSLCCIEQTRKCANTI(hVa)KCEKOND	Pro>Hyp (x2);Val>hVA (x1)
3.787	2403.96	2403.98	0.0184	OK193_E_021_C	LSGGTYSR(hVa)DTCI(Btr)K(hVa)CPQSP	Val>hVA (x2);Trp>BTr (x1)
3.787	2403.96	2403.98	0.0184	OK193_E_021_C	LSGGTYSR(hVa)DTCI(Btr)KVCOQSP	Pro>Hyp (x1);Val>hVA (x1);Trp>BTr (x1)
3.85	2810.01	2810	0.008	CebrOK033_J_176_U	GRTNDCPENCETCNPDLPCGCCGTVIC
3.85	3154.11	3154.11	0.0045	CebrOK035_J_323_Sf-mi2	DCGTKC(hVa)GCGNPNGCCCHDQ(hVa)CVHKYRCE	Val>hVA (x2)
3.85	3170.11	3170.11	0.0002	CebrOK035_J_323_Sf-mi2	DCGTKC(hVa)GCGNONGCCCHDQ(hVa)CVHKYRCE	Pro>Hyp (x1);Val>hVA (x2)
3.85	3132.14	3132.18	0.0326	OK006_E_117_O1	(Btr)PCK(hVa)AGSPCGL(hVa)S(Gla)CCGTCN(hVa)LRNRC(hVa)(Nh2)	[free end]>amidation (x1);Glu>Gla (x1);Val>hVA (x4);Trp>BTr (x1)
3.85	3132.14	3132.18	0.0326	OK006_E_117_O1	(Btr)OCK(hVa)AGSPCGL(hVa)S(Gla)CCGTCN(hVa)LRNRCV(Nh2)	[free end]>amidation (x1);Glu>Gla (x1);Pro>Hyp (x1);Val>hVA (x3);Trp>BTr (x1)
3.85	4402.72	4402.76	0.0405	OK214_J_172_O2	LNQGDGVKCPR(Gla)KINFSSKRKTTAAS(Btr)G(Gla)GDCSG(Btr)SVY	Glu>Gla (x2);Trp>BTr (x2)
3.867	4403.73	4403.78	0.0498	OK005_J_056_I3	TONCEQIGGSCSGSEGCCGSLCCIEQTRKCANTI(hVa)KCEKOND(Nh2)	[free end]>amidation (x1);Pro>Hyp (x2);Val>hVA (x1)
3.884	3594.19	3594.22	0.0265	OK212_J_275_Virr02	GQDC(Gla)(Gla)GLMTCNEAGECC(Btr)ONTCRAISGKSOO(Nh2)	[free end]>amidation (x1);Glu>Gla (x2);Pro>Hyp (x3);Trp>BTr (x1)
3.901	4403.67	4403.63	0.0386	OK006_E_148_O2	RTAL(Gla)CWWEGECSGWS(hVa)YCTKHSECCSGECGGNYCELW(Nh2)	[free end]>amidation (x1);Glu>Gla (x1);Val>hVA (x1)
3.936	3445.44	3445.46	0.0278	OK006_E_003_A	GGH(hVa)CCF(hVa)KECAEQHOQWCEGGLQT(hVa)APPYL	Pro>Hyp (x1);Val>hVA (x3)
3.936	3445.44	3445.46	0.0278	OK006_E_003_A	GGH(hVa)CCF(hVa)KECAEQHOQWCEGGLQTVAOPYL	Pro>Hyp (x2);Val>hVA (x2)
3.936	3445.35	3445.35	0.0003	OK213_E_132_M	C(hVa)YSTPCG(Gla)CTRRGKICSV(Gla)PGGRGTCG(Gla)CVP	Glu>Gla (x3);Val>hVA (x1)
3.936	3445.35	3445.35	0.0003	OK213_E_132_M	CVYSTOCG(Gla)CTRRGKICSV(Gla)PGGRGTCG(Gla)CVP	Glu>Gla (x3);Pro>Hyp (x1)
3.987	2459.89	2459.88	0.0054	CebrOK035_J_213_P	ASCGGGCALSTDCOSTCNTCLAALCE	Pro>Hyp (x1)
3.987	2481.92	2481.89	0.0311	CebrOK035_J_234_T	TVLFOCCO(Gla)YEWCCTWMDW(Nh2)	[free end]>amidation (x1);Glu>Gla (x1);Pro>Hyp (x2)
3.987	2497.84	2497.88	0.0443	CebrOK035_J_234_T	T(hVa)LFOCCO(Gla)YEWCCTWMDW(Nh2)	[free end]>amidation (x1);Glu>Gla (x1);Pro>Hyp (x2);Val>hVA (x1)
3.987	2513.9	2513.94	0.0402	OK005_J_087_M	LPCCYI(Gla)(Btr)CSRRCLCNPLEP(Nh2)	[free end]>amidation (x1);Glu>Gla (x1);Trp>BTr (x1)
3.987	2513.9	2513.94	0.0402	OK212_J_099_M	LPCCYI(Gla)(Btr)CSRRCICNPLEP(Nh2)	[free end]>amidation (x1);Glu>Gla (x1);Trp>BTr (x1)
4.016	1757.59	1757.59	0.0004	CebrOK035_J_101_M	CCPAPKCRVGCYSCC(Gla)(Nh2)	[free end]>amidation (x1);Glu>Gla (x1)
4.199	4086.61	4086.64	0.023	CebrOK035_J_281_Cerm10	(hVa)EEACEGTYRNCRGRODGASCCRNSHCYLG(hVa)CYINF	Pro>Hyp (x1);Val>hVA (x2)
4.199	1666.6	1666.56	0.037	OK193_E_075_M	CCKAPWCRTPCACCE
4.199	4085.69	4085.65	0.0326	SRX1323887_E_104_O1	ECLEEGSGCTYTSDACCOHLRCRGTHAGA(hVa)CVEYQSOI(Nh2)	[free end]>amidation (x1);Pro>Hyp (x2);Val>hVA (x1)
4.199	4086.61	4086.64	0.023	SRX1323887_E_104_O1	ECLEEGSGCTYTSDACCOHLRCRGTHAGA(hVa)C(hVa)EYQSPI	Pro>Hyp (x1);Val>hVA (x2)
4.223	6348.67	6348.7	0.0315	OK212_J_295_Ferritin	MAVSQCRQNYHA(Gla)C(Gla)AGINRQINM(Gla)FHASYCYQSMAFYFDRDDVALPGFAKFF	Glu>Gla (x3)
4.284	5988.07	5988.03	0.0374	CebrOK035_J_113_M	QLDGDQTADRHADQRGQDLTKQYRNLKR(hVa)LKKRHWVYHOHPHDNSIWSL	Pro>Hyp (x1);Val>hVA (x1)
4.284	5988.07	5988.03	0.0374	CebrOK035_J_113_M	QLDGDQTADRHADQRGQDLTKQYRNLKRVLKKRHWVYHOHOHDNSIWSL	Pro>Hyp (x2)
4.284	5988.07	5988.03	0.0374	CebrOK035_J_113_M	ZLDGDQTADRHADQRGQDLTKQYRNLKR(hVa)LKKRHWVYHOHPHDNSIWSL(Nh2)	[free end]>amidation (x1);Gln>Pyroglutamic acid (x1);Pro>Hyp (x1);Val>hVA (x1)
4.284	5988.07	5988.03	0.0374	CebrOK035_J_113_M	ZLDGDQTADRHADQRGQDLTKQYRNLKRVLKKRHWVYHOHOHDNSIWSL(Nh2)	[free end]>amidation (x1);Gln>Pyroglutamic acid (x1);Pro>Hyp (x2)
4.302	3119.97	3119.98	0.004	CebrOK035_J_316_Rimp05	TCTNCOEEOCCYGDQCMODOGHEOFCGN	Pro>Hyp (x5)
4.302	3082.02	3082.02	0.0043	OK214_J_277_Rimp02	DNMCDLQYCOGGCSSPCWCSSRNTC(Gla)GN(Nh2)	[free end]>amidation (x1);Glu>Gla (x1);Pro>Hyp (x1)
4.364	2447.08	2447.1	0.0188	OK214_J_079_M	DQO(hVa)(Gla)RYAENKQDLNPDERG(Nh2)	[free end]>amidation (x1);Glu>Gla (x1);Pro>Hyp (x1);Val>hVA (x1)
4.547	3037.02	3037.04	0.02	OK006_E_153_O2	KSTA(Gla)S(Btr)(Btr)EGECRTWNAPCRLDSE(Nh2)	[free end]>amidation (x1);Glu>Gla (x1);Trp>BTr (x2)
4.616	3998.49	3998.49	0.0042	CebrOK016_E_128_Cerm 10	RFDODDYL(Gla)K(hVa)(Gla)(Gla)ACEGTNRNC(hVa)GQOFDAOCCGD(Nh2)	[free end]>amidation (x1);Glu>Gla (x3);Pro>Hyp (x3);Val>hVA (x2)
4.616	3997.54	3997.55	0.0186	CebrOK035_J_169_O2	ZCIAQGFGCEEDEECCSNLWCKCTGSOLCTLYKCKP	Gln>Pyroglutamic acid (x1);Pro>Hyp (x1)
4.616	3467.2	3467.17	0.036	OK213_E_225_V	DQ(hVa)(hVa)COLCDGSOCCGRCDR(hVa)(Btr)(Gla)SYHC(hVa)NI	Glu>Gla (x1);Pro>Hyp (x2);Val>hVA (x4);Trp>BTr (x1)
4.747	2987.35	2987.31	0.042	OK212_J_233_Cerm03	FCPNPCQSCPSPGEC(hVa)LPISYAFTLRF	Val>hVA (x1)
4.747	2987.35	2987.31	0.042	OK212_J_233_Cerm03	FCONPCQSCPSPGECVLPISYAFTLRF	Pro>Hyp (x1)
4.816	1534.57	1534.55	0.0146	SRX1323887_E_057_M	CCAPSACRLGCRPCC(Nh2)	[free end]>amidation (x1)
4.965	2314.08	2314.04	0.0479	OK213_E_303_Elevenin	(Btr)RIDCTRFVFAORCRGVAA(Nh2)	[free end]>amidation (x1);Pro>Hyp (x1);Trp>BTr (x1)
4.982	1619.54	1619.53	0.01	CebrOK016_E_049_M	CCKYPLCAAGCSCCTT
5.028	1440.42	1440.43	0.005	OK193_E_093_M	CCC(Btr)RCTRSLH	Trp>BTr (x1)
5.028	2594.13	2594.18	0.0442	OK214_J_083_M	DQO(hVa)ERYAENKQDFNPDERRG	Pro>Hyp (x1);Val>hVA (x1)
5.062	2652.11	2652.12	0.0065	SRX1323887_E_075_M	EIILOALR(hVa)QSL(hVa)ACGDNOD(Btr)CT	Pro>Hyp (x2);Val>hVA (x2);Trp>BTr (x1)
5.228	3900.44	3900.45	0.0174	OK213_E_134_M	DTSDSCSN(Gla)RCNNTADCSTGCSCKFNQARRGETCLS	Glu>Gla (x1)
5.342	989.348	989.352	0.0039	OK006_E_168_O2	GCOWEPWC(Nh2)	[free end]>amidation (x1);Pro>Hyp (x1)
5.342	1636.57	1636.59	0.0148	OK213_E_209_T	RCCQI(hVa)PQCC(Gla)WN	Glu>Gla (x1);Val>hVA (x1)
5.393	3187.15	3187.17	0.0173	CebrOK035_J_163_O1	ZDCLAGSQFCGFOKIGPTCCSG(Btr)CLF(hVa)CL	Gln>Pyroglutamic acid (x1);Pro>Hyp (x1);Val>hVA (x1);Trp>BTr (x1)
5.393	4615.13	4615.13	0.0004	CebrOK035_J_184_O2	ZSLD(Gla)L(Btr)SEGSCAG(Btr)SDSCQQNSECCSGECIGNYCD(Btr)(Btr)	Gln>Pyroglutamic acid (x1);Glu>Gla (x1);Trp>BTr (x4)
5.393	2680.12	2680.11	0.0048	SRX1323887_E_075_M	(Gla)IILOALR(hVa)QSLVACGDNOD(Btr)CT	Glu>Gla (x1);Pro>Hyp (x2);Val>hVA (x1);Trp>BTr (x1)
5.462	2699.09	2699.04	0.0463	OK193_E_001_A	GLW(hVa)(Gla)CCANPACRNTHF(Gla)HCPVN	Glu>Gla (x2);Val>hVA (x1)
5.462	2699.09	2699.04	0.0463	OK193_E_001_A	GLWV(Gla)CCANOACRNTHF(Gla)HCPVN	Glu>Gla (x2);Pro>Hyp (x1)
5.611	1714.5	1714.5	0.0018	OK213_E_209_T	RCCQI(hVa)PQCC(Gla)(Btr)N	Glu>Gla (x1);Val>hVA (x1);Trp>BTr (x1)
5.645	1659.53	1659.53	0.0044	Eb3-IP01 [P05056]_M	CCSQNCLTCIOCCPY	Pro>Hyp (x1)
5.708	2362.84	2362.84	0.0039	CebrOK016_E_122_Cerm 02	CPWCGMSCCSPNYCQG(hVa)TCTIV(Nh2)	[free end]>amidation (x1);Val>hVA (x1)
5.708	2362.84	2362.84	0.0039	CebrOK016_E_122_Cerm 02	COWCGMSCCSPNYCQGVTCTIV(Nh2)	[free end]>amidation (x1);Pro>Hyp (x1)
5.708	2378.79	2378.78	0.0078	CebrOK033_J_173_T	NKGODODA(Btr)VDCSNFP(Gla)HCP	Glu>Gla (x1);Pro>Hyp (x2);Trp>BTr (x1)
5.708	2340.78	2340.81	0.03	OK006_E_091_M	CCTFO(hVa)CTACYCCRMHOQHP	Pro>Hyp (x2);Val>hVA (x1)
5.759	1642.55	1642.55	0.0048	Eb3-IP01 [P05056]_M	CCSQNCLTCIPCCPY(Nh2)	[free end]>amidation (x1)
5.759	1620.55	1620.59	0.0386	OK213_E_209_T	RCCQIVPQCC(Gla)WN	Glu>Gla (x1)
5.794	981.4	981.373	0.027	Contryphan-Eb [P09768]_O2	GCPWHPWC(Nh2)	[free end]>amidation (x1)
5.794	2340.55	2340.54	0.0103	OK193_E_174_T	RCCOG(Btr)(Gla)LCC(Gla)(Btr)DDWW(Nh2)	[free end]>amidation (x1);Glu>Gla (x2);Pro>Hyp (x1);Trp>BTr (x2)
5.874	1457.5	1457.48	0.0154	OK006_E_076_M	CCSKTCWKCTPCC(Nh2)	[free end]>amidation (x1)
5.908	2340.78	2340.81	0.03	OK006_E_091_M	CCTFO(hVa)CTACYCCRMHOQHP	Pro>Hyp (x2);Val>hVA (x1)
5.908	1290.52	1290.52	0.006	OK006_E_133_O1	DCLPDGSLCGVNT
5.977	1658.5	1658.5	0.0035	OK006_E_095_M	CCIGPECPEECYCC(hVa)(Nh2)	[free end]>amidation (x1);Val>hVA (x1)
5.977	1658.5	1658.5	0.0035	OK006_E_095_M	CCIGOECPEECYCCV(Nh2)	[free end]>amidation (x1);Pro>Hyp (x1)
6.005	1634.5	1634.5	0.0002	OK193_E_053_M	CCAQPCYMGCIPCCF
6.005	1676.51	1676.48	0.0324	SRX1323887_E_077_M	QOSSDCOGFOD(hVa)(Btr)C	Pro>Hyp (x3);Val>hVA (x1);Trp>BTr (x1)
6.005	1676.51	1676.48	0.0324	SRX1323887_E_077_M	ZOSSDCOGFOD(hVa)(Btr)C(Nh2)	[free end]>amidation (x1);Gln>Pyroglutamic acid (x1);Pro>Hyp (x3);Val>hVA (x1);Trp>BTr (x1)
6.074	3632.43	3632.39	0.0367	OK006_E_164_O2	CL(hVa)SGKQCSNNAECCSSIC(hVa)QTRHRCS(Btr)QLW	Val>hVA (x2);Trp>BTr (x1)
6.24	707.399	707.349	0.0496	OK212_J_125_M	CLFLLC(Nh2)	[free end]>amidation (x1)

## Sheet: V. judaeus
RT (min)	Peak mass	Peptide mass	Mass error	Peptide name	Peptide sequence	Peptide PTMs
2.992	2151.71	2151.75	0.0394	CebrOK035_J_106_M	PFCCPIGQCQLSMCDPPCCD(Nh2)	[free end]>amidation (x1)
2.992	2113.75	2113.72	0.032	OK212_J_110_M	LEDGCCTRPRCTGACSCCQD
3.473	2156.86	2156.89	0.0203	OK005_J_086_M	CCSLRRCKPHCHCCVYRP
3.621	2587.99	2587.97	0.018	OK005_J_089_M	MTLLLEDGCCTRORCTGACSCCQD	Pro>Hyp (x1)
3.621	2587.99	2587.97	0.018	OK212_J_115_M	MTLLLEDGCCTRPRCTGSCSCCQD
3.656	2226.81	2226.83	0.0164	CebrOK033_J_051_J	ICPGMCLGGYGK(Gla)PFCHCT(Gla)(Nh2)	[free end]>amidation (x1);Glu>Gla (x2)
3.736	3311.22	3311.21	0.01	CebrOK016_E_024_I2	CIP(Gla)GSSCSSSGSCCHKSCCRWTCNQPCLIP	Glu>Gla (x1)
3.753	2208.82	2208.84	0.017	OK212_J_235_Cerm03	FCONOCQFCPAPG(Gla)C(hVa)LPNS(Nh2)	[free end]>amidation (x1);Glu>Gla (x1);Pro>Hyp (x2);Val>hVA (x1)
3.804	2404.87	2404.86	0.0034	OK193_E_068_M	LOCCDVG(Btr)CSKRCNCDVYRP(Nh2)	[free end]>amidation (x1);Pro>Hyp (x1);Trp>BTr (x1)
3.821	2897.14	2897.1	0.0344	CebrOK033_J_099_O1	CRLGA(Gla)SCE(hVa)FSQNCCQGTCVFICFP	Glu>Gla (x1);Val>hVA (x1)
3.821	2897.14	2897.1	0.0344	CebrOK033_J_099_O1	CRLGA(Gla)SCEVFSQNCCQGTCVFICFO	Glu>Gla (x1);Pro>Hyp (x1)
3.821	2928.1	2928.11	0.0027	CebrOK033_J_099_O1	CRLGA(Gla)SCE(hVa)FSQNCCQGTC(hVa)FICFO(Nh2)	[free end]>amidation (x1);Glu>Gla (x1);Pro>Hyp (x1);Val>hVA (x2)
3.85	2912.11	2912.11	0.004	CebrOK033_J_099_O1	CRLGA(Gla)SCE(hVa)FSQNCCQGTC(hVa)FICFP(Nh2)	[free end]>amidation (x1);Glu>Gla (x1);Val>hVA (x2)
3.85	2386.85	2386.87	0.0251	CebrOK035_J_229_T	ILQKH(Btr)AKPSCCP(Gla)HTWCC	Glu>Gla (x1);Trp>BTr (x1)
3.936	4518.84	4518.85	0.0032	CebrOK035_J_057_I2	GIPCVGSGGVCSSHVWCCDSLDVCCELPGPSICTQEAACESVGSAL(Nh2)	[free end]>amidation (x1)
3.936	2683.92	2683.91	0.008	OK212_J_065_I2	LOCOLNDPCCADMDCCGDVCLLNCE	Pro>Hyp (x2)
3.936	3578.61	3578.63	0.0195	SRX1323887_E_110_O1	ACRKKW(Gla)YCI(hVa)PIIGFIYCCPGLICGPF(hVa)C(hVa)	Glu>Gla (x1);Val>hVA (x3)
3.936	3578.61	3578.63	0.0205	SRX1323887_E_110_O1	ACRKKW(Gla)YCI(hVa)OIIGFIYCCPGLICGPF(hVa)CV	Glu>Gla (x1);Pro>Hyp (x1);Val>hVA (x2)
3.97	4502.8	4502.79	0.0052	OK005_J_048_I1	(Btr)GTCSLLGKGCRHHSDCCWDLCCTGKTCVMTVLPCNFFPL(Nh2)	[free end]>amidation (x1);Trp>BTr (x1)
3.97	4501.81	4501.82	0.016	OK212_J_269_Sf-mi1	(hVa)LRICHTCSMSSGRFC(hVa)GTCCHADYACRPDPWGCGCVLRTD	Val>hVA (x2)
4.033	3290.2	3290.2	0.006	OK006_E_054_H	AQ(hVa)DCGGTLC(Gla)FGCCKOINGEDECRELDCD(Nh2)	[free end]>amidation (x1);Glu>Gla (x1);Pro>Hyp (x1);Val>hVA (x1)
4.033	4952.28	4952.31	0.0308	OK193_E_099_M	LDADQO(hVa)(Gla)RY(hVa)(Gla)NK(Gla)NLNOD(Gla)RREIILOALR(hVa)QSL(hVa)TCTM(Nh2)	[free end]>amidation (x1);Glu>Gla (x4);Pro>Hyp (x3);Val>hVA (x4)
4.153	3230.24	3230.23	0.012	CebrOK033_J_143_O3	AVT(Gla)ACEESCEVSGKTCCGTSNGQOTCAPVCL	Glu>Gla (x1);Pro>Hyp (x1)
4.153	3274.22	3274.27	0.0483	OK213_E_204_Q	NCTOCGPGLCCIPGKSC(Gla)TSTHHGTFGQPAC(hVa)	Glu>Gla (x1);Pro>Hyp (x1);Val>hVA (x1)
4.153	3274.22	3274.27	0.0483	OK213_E_204_Q	NCTOCGOGLCCIPGKSC(Gla)TSTHHGTFGQPACV	Glu>Gla (x1);Pro>Hyp (x2)
4.153	2784.01	2783.98	0.0226	SRX1323887_E_004_A	(Btr)SFSTLFHA(hVa)CCAYOHCRFMOGC	Pro>Hyp (x2);Val>hVA (x1);Trp>BTr (x1)
4.182	3661.39	3661.38	0.0102	CebrOK033_J_046_I2	CIR(Gla)DAOCSFSAHCCGRNCCRGYCEROCRWI	Glu>Gla (x1);Pro>Hyp (x2)
4.182	3274.16	3274.17	0.005	J6.1 [P03387]_O1	(Gla)CTRPGGACYYDSHCCRH(hVa)CHEVFNTCM	Glu>Gla (x1);Val>hVA (x1)
4.25	3761.43	3761.42	0.0075	CebrOK035_J_183_O2	WW(Gla)GECRGWSNGCSRHSECCSDNCKGIYCALW(Nh2)	[free end]>amidation (x1);Glu>Gla (x1)
4.25	2402.99	2403	0.01	OK005_J_015_C	LSGGTYSR(hVa)DTCI(Btr)K(hVa)CPQSP(Nh2)	[free end]>amidation (x1);Val>hVA (x2);Trp>BTr (x1)
4.25	2365.04	2365.06	0.0254	OK006_E_104_M	EIILPALRVQSLVTCTMD(Btr)C(Nh2)	[free end]>amidation (x1);Trp>BTr (x1)
4.25	2746.03	2746.04	0.0125	OK193_E_001_A	GLW(hVa)(Gla)CCANOACRNTHF(Gla)HCO(hVa)N(Nh2)	[free end]>amidation (x1);Glu>Gla (x2);Pro>Hyp (x2);Val>hVA (x2)
4.25	2339.91	2339.89	0.0179	Eb1.3 [P06435]_A	IALIATR(Gla)CCANOQC(Btr)AKNC(Nh2)	[free end]>amidation (x1);Glu>Gla (x1);Pro>Hyp (x1);Trp>BTr (x1)
4.25	2377.87	2377.88	0.0106	SRX1323887_E_002_A	NECCDNPPCKSSNPDLCDWRS
4.319	3318.19	3318.19	0.0071	CebrOK014_E_027_J	YTONDA(Gla)SS(hVa)CYFLCLMGIDLD(Gla)CNCO(Gla)(Nh2)	[free end]>amidation (x1);Glu>Gla (x3);Pro>Hyp (x2);Val>hVA (x1)
4.319	3317.71	3317.76	0.0495	OK214_J_168_O2	LNLGDG(hVa)KSPRGKINFVSKRKTTAESWWE(Nh2)	[free end]>amidation (x1);Val>hVA (x1)
4.416	2415.88	2415.91	0.035	Eb3-2-I01 [P04936]_M	LPCCDVG(Btr)CSRRCICDVYRP(Nh2)	[free end]>amidation (x1);Trp>BTr (x1)
4.45	2453.85	2453.86	0.014	SRX1323887_E_002_A	N(Gla)CCDNOOCKSSNPDLCDWRS	Glu>Gla (x1);Pro>Hyp (x2)
4.484	1646.6	1646.58	0.0209	OK213_E_105_M	CCKYPLCAAGCSCCKT
4.53	3764.71	3764.76	0.0426	OK214_J_169_O2	LNQGG(Gla)VKSPR(Gla)KINFLSKR(Gla)SAAESRWEGEC	Glu>Gla (x3)
4.633	2631.03	2631.01	0.0213	OK193_E_131_O1	RC(hVa)QTGGSCOSTTGCCNGLCNVDKCT(Nh2)	[free end]>amidation (x1);Pro>Hyp (x1);Val>hVA (x1)
4.696	4419.02	4419.03	0.0062	OK213_E_222_U	HFNLAVLRGCRFCVIWCCPPRGVCQSSGCRPAYEALQTGQ
4.73	3181.23	3181.24	0.0005	CebrOK033_J_097_O1	DCGEQGQGCYTRPCCPNL(hVa)CRGGGTGGGVCQP	Val>hVA (x1)
4.73	3181.23	3181.24	0.0005	CebrOK033_J_097_O1	DCGEQGQGCYTROCCPNLVCRGGGTGGGVCQP	Pro>Hyp (x1)
4.73	3143.25	3143.21	0.0409	OK006_E_108_M	GRMNGFLTQMLFGHODHNYAA(Btr)CPWC	Pro>Hyp (x1);Trp>BTr (x1)
4.73	3180.05	3180.05	0.0028	OK212_J_184_P	SGCG(Gla)OCSEDADCOOGOSCPYCTQNLSKCM	Glu>Gla (x1);Pro>Hyp (x4)
4.845	2571.98	2571.98	0.0008	OK005_J_089_M	MTLLLEDGCCTRPRCTGACSCCQD
4.845	2913.35	2913.36	0.0166	OK005_J_135_O1	CVG(Gla)NEPCIIPLLGTIICCTGVCLIVCV(Nh2)	[free end]>amidation (x1);Glu>Gla (x1)
4.845	2609.97	2610.01	0.0366	OK006_E_139_O1	RCVQTGGSCPSTNGCCNGLCNVNRCA
4.845	2951.35	2951.31	0.0435	OK214_J_333_PDI	NFKE(hVa)AMDKSKA(hVa)F(hVa)EFYAPWCGHC	Val>hVA (x3)
4.845	2951.35	2951.31	0.0435	OK214_J_333_PDI	NFKE(hVa)AMDKSKA(hVa)FVEFYAOWCGHC	Pro>Hyp (x1);Val>hVA (x2)
4.845	2664.13	2664.12	0.0135	SRX1323887_E_075_M	(Gla)IILOALRVQSLVACGDNOD(Btr)CT	Glu>Gla (x1);Pro>Hyp (x2);Trp>BTr (x1)
4.87	2931.07	2931.1	0.028	Eb6.11 [P03359]_O1	ECTRSGGACNSHTQCCNAFCDTATRTCV(Nh2)	[free end]>amidation (x1)
4.88	2893.11	2893.03	0.0847	Eb6.9 [P03357]_O1	ECTRSGGACNSHTQCCDDFCSTATSTCI(Nh2)	[free end]>amidation (x1)
4.965	1663.56	1663.55	0.0126	OK212_J_093_M	CCTPPWCRVPCACCE
5.01	3148.09	3148.12	0.025	CebrOK035_J_191_O2	KSTA(Gla)SWW(Gla)GECLGWPNGCETGSDCCSGS(Nh2)	[free end]>amidation (x1);Glu>Gla (x2)
5.01	2857.11	2857.1	0.01	OK006_E_250_Sf-mi2	ANGLOTHF(hVa)LRTCTGNCSLCGA(hVa)CCC(Gla)	Glu>Gla (x1);Pro>Hyp (x1);Val>hVA (x2)
5.079	2578.93	2578.9	0.0336	CebrOK035_J_072_K	HOCD(Gla)SVKACYD(Btr)CI(Gla)LOYL	Glu>Gla (x2);Pro>Hyp (x2);Trp>BTr (x1)
5.079	2346.06	2346.03	0.038	OK213_E_303_Elevenin	(Btr)RIDCTRF(hVa)FAORCRG(hVa)AA(Nh2)	[free end]>amidation (x1);Pro>Hyp (x1);Val>hVA (x2);Trp>BTr (x1)
5.113	3541.2	3541.21	0.013	CebrOK033_J_124_O2	GM(Btr)GKCKDGLTTCLAPS(Gla)CCSGNC(Gla)QNCKMW(Nh2)	[free end]>amidation (x1);Glu>Gla (x2);Trp>BTr (x1)
5.113	4663.18	4663.2	0.0154	OK006_E_150_O2	KTTA(Gla)S(Btr)(Btr)(Gla)G(Gla)CSG(Btr)SVYCTSDA(Gla)CCSG(Gla)CGGNYCELW	Glu>Gla (x5);Trp>BTr (x3)
5.113	2853.26	2853.22	0.032	OK006_E_153_O2	KSTAESWWEGECRTWNAOCRLDSE(Nh2)	[free end]>amidation (x1);Pro>Hyp (x1)
5.148	4752.78	4752.78	0.0078	OK212_J_071_I2	GIOC(hVa)GSGG(hVa)CSSH(hVa)(Btr)CSDSLD(hVa)CC(Gla)LOGOSICTREGACESVGSAL(Nh2)	[free end]>amidation (x1);Glu>Gla (x1);Pro>Hyp (x3);Val>hVA (x4);Trp>BTr (x1)
5.228	4706.78	4706.79	0.017	CebrOK033_J_032_H	DTDODDKDOS(hVa)HNYWRTTDCGG(hVa)PCQFGCCR(Gla)DRCRELDC(Nh2)	[free end]>amidation (x1);Glu>Gla (x1);Pro>Hyp (x2);Val>hVA (x2)
5.228	2562.95	2562.91	0.0432	CebrOK035_J_092_M	LOCCYI(Gla)(Btr)CSRRCICDOLEO(Nh2)	[free end]>amidation (x1);Glu>Gla (x1);Pro>Hyp (x3);Trp>BTr (x1)
5.228	2562.95	2562.91	0.0432	OK005_J_087_M	LOCCYI(Gla)(Btr)CSRRCLCNOLEO	Glu>Gla (x1);Pro>Hyp (x3);Trp>BTr (x1)
5.228	2562.95	2562.91	0.0432	OK212_J_099_M	LOCCYI(Gla)(Btr)CSRRCICNOLEO	Glu>Gla (x1);Pro>Hyp (x3);Trp>BTr (x1)
5.228	2598.97	2599.01	0.0403	OK214_J_268_Ggeo03	DEAQCPACRCTNLKEGLC(hVa)DSTEC	Val>hVA (x1)
5.376	3308.18	3308.13	0.047	CebrOK035_J_135_O1	DCGSQGEGCYSROCCOGLECIGGROGG(hVa)CQ(Btr)(Nh2)	[free end]>amidation (x1);Pro>Hyp (x3);Val>hVA (x1);Trp>BTr (x1)
5.376	3256.33	3256.31	0.0204	OK005_J_237_Cerm03	FCONOCQSCOSOG(Gla)C(hVa)RPYTGHTFFLHL	Glu>Gla (x1);Pro>Hyp (x4);Val>hVA (x1)
5.376	3256.33	3256.31	0.0204	OK005_J_237_Cerm03	FCONOCQSCOSOG(Gla)CVROYTGHTFFLHL	Glu>Gla (x1);Pro>Hyp (x5)
5.376	4736.74	4736.73	0.0132	OK212_J_067_I2	GIOCVGSGGFCSSHV(Btr)CCDSLDVCC(Gla)LPGPSMCTREGACESVGSAL(Nh2)	[free end]>amidation (x1);Glu>Gla (x1);Pro>Hyp (x1);Trp>BTr (x1)
5.376	3278.31	3278.33	0.014	OK214_J_218_V	DQ(hVa)VCPLCDGSPCCGRCDRVWESYHCINI(Nh2)	[free end]>amidation (x1);Val>hVA (x1)
5.376	3278.31	3278.33	0.014	OK214_J_218_V	DQVVCOLCDGSPCCGRCDRVWESYHCINI(Nh2)	[free end]>amidation (x1);Pro>Hyp (x1)
5.376	3294.3	3294.32	0.02	OK214_J_218_V	DQ(hVa)(hVa)CPLCDGSPCCGRCDRVWESYHCINI(Nh2)	[free end]>amidation (x1);Val>hVA (x2)
5.411	4647.1	4647.11	0.011	OK006_E_155_O2	ZAS(Btr)(Gla)V(Btr)(Btr)EGNCIE(Btr)LASCSTDEQCCSGACGDYCTL(Btr)	Gln>Pyroglutamic acid (x1);Glu>Gla (x1);Trp>BTr (x5)
5.411	3485.3	3485.3	0.0065	OK212_J_275_Virr02	GQDC(Gla)(Gla)GLMTCNEAGECCWONTCRAISGKSPP	Glu>Gla (x2);Pro>Hyp (x1)
5.411	4685.09	4685.08	0.0026	OK214_J_159_O2	KSAA(Gla)S(Btr)(Btr)(Gla)G(Gla)CSG(Btr)S(hVa)YCTSDS(Gla)CCSGECGGNYCEL(Btr)	Glu>Gla (x4);Val>hVA (x1);Trp>BTr (x4)
5.508	4690.87	4690.86	0.0082	OK212_J_071_I2	GIOC(hVa)GSGG(hVa)CSSH(hVa)WCSDSLD(hVa)CC(Gla)LOGOSICTREGACES(hVa)GSAL(Nh2)	[free end]>amidation (x1);Glu>Gla (x1);Pro>Hyp (x3);Val>hVA (x5)
5.508	4690.93	4690.97	0.0422	OK212_J_075_I3	(hVa)WOLGOMAOICRGTGGKCRYNSDCCGWLCCSGKLA(hVa)CANTVMPC(Nh2)	[free end]>amidation (x1);Pro>Hyp (x3);Val>hVA (x2)
5.594	2441.86	2441.82	0.0371	CebrOK016_E_123_Cerm 02	CO(Btr)CGFASCSPNYCQGLTCTIV	Pro>Hyp (x1);Trp>BTr (x1)
5.77	4146.88	4146.9	0.025	CebrOK033_J_258_PPI	MQPPNIT(hVa)ETTMG(hVa)F(hVa)LEMYWKHAPTTCRNF(hVa)ELC	Val>hVA (x4)
5.811	3381.99	3381.98	0.0152	OK005_J_050_I2	CHP(Gla)GTPCTND(Gla)QCCLM(Gla)CCFWSCSSNCE	Glu>Gla (x3)
5.811	1530.46	1530.46	0.0054	OK005_J_094_M	CCELOCMGCIPCCF	Pro>Hyp (x1)
5.958	7011.3	7011.32	0.0152	CebrOK035_J_040_F	IIYGRKLMHACALANNYIDDPWHMMSVGDF(Gla)DKGRYYAMLR(Gla)LVPCLSTFLRTRY(Gla)LP	Glu>Gla (x3)
5.958	3520.5	3520.46	0.038	OK006_E_003_A	GGH(hVa)CCF(hVa)K(Gla)CAEQHOQWCEGGLQT(hVa)AOOYL(Nh2)	[free end]>amidation (x1);Glu>Gla (x1);Pro>Hyp (x3);Val>hVA (x3)
6.337	2114.64	2114.66	0.0186	CebrOK035_J_233_T	CCISF(Gla)(Gla)CCHW(Gla)EELE(Nh2)	[free end]>amidation (x1);Glu>Gla (x3)
6.337	2098.67	2098.67	0.0008	OK193_E_079_M	ZKCC(Gla)WK(hVa)C(Gla)(hVa)QCGCCH(Nh2)	[free end]>amidation (x1);Gln>Pyroglutamic acid (x1);Glu>Gla (x2);Val>hVA (x2)
6.457	1557.52	1557.51	0.0106	OK212_J_121_M	CCVGPCYMGCIPCCL
6.554	5047.35	5047.35	0.0014	CebrOK014_E_078_O2	(Btr)(Btr)R(Btr)GGCMA(Btr)FGLCSRDSECCSNSCD(hVa)TRCELMOFOPD(Btr)	Pro>Hyp (x2);Val>hVA (x1);Trp>BTr (x5)
6.689	5495.42	5495.39	0.024	OK006_E_037_F	(Gla)EYDLNDPDVLAIVDEGQKLMHACSIANKYTYNP(Btr)(Btr)KLNILAFKE	Glu>Gla (x1);Trp>BTr (x2)
6.689	5456.49	5456.52	0.0336	OK214_J_114_M	ZLDGDQPADRRAD(Gla)KDLTQQYLNLRR(hVa)LQRGL(hVa)CAHASPYHNAV(Btr)S	Gln>Pyroglutamic acid (x1);Glu>Gla (x1);Val>hVA (x2);Trp>BTr (x1)
6.689	5456.49	5456.52	0.0336	OK214_J_114_M	ZLDGDQOADRRAD(Gla)KDLTQQYLNLRR(hVa)LQRGLVCAHASPYHNAV(Btr)S	Gln>Pyroglutamic acid (x1);Glu>Gla (x1);Pro>Hyp (x1);Val>hVA (x1);Trp>BTr (x1)
6.72	3775.67	3775.68	0.0093	CebrOK033_J_141_O2	DGDQOADRDA(hVa)ORDDNOGGMSEKFLNALQRRGCO	Pro>Hyp (x4);Val>hVA (x1)
6.72	3813.64	3813.69	0.0508	OK214_J_169_O2	LNQGG(Gla)(hVa)KSPR(Gla)KINFLSKRESAAESR(Btr)EGEC(Nh2)	[free end]>amidation (x1);Glu>Gla (x2);Val>hVA (x1);Trp>BTr (x1)
6.72	3813.64	3813.69	0.0508	OK214_J_169_O2	LNQGG(Gla)VKSOR(Gla)KINFLSKRESAAESR(Btr)EGEC(Nh2)	[free end]>amidation (x1);Glu>Gla (x2);Pro>Hyp (x1);Trp>BTr (x1)
6.771	1514.48	1514.46	0.0136	OK005_J_094_M	CCELPCMGCIPCCF
