# Supplementary material for: Comparative Venomics of the Cryptic Cone Snail Species Virroconus ebraeus and Virroconus judaeus
Source: Mar Drugs. 2022 Feb 17;20(2):149. doi: 10.3390/md20020149 (PMC8875821; doi:10.3390/md20020149)
Supplement: Supplementary file 1 [file marinedrugs-20-00149-s001.zip › Supplementary Table S1.xlsx]

## Sheet: OK006A (ebraeus)
Supplementary Table 1. Classification of conotoxins, hormones and other venom related proteins of each sample
Sequence code	Category	Superfamily	Paralog group	TRINITY CDS name	Transcript	CDS	tpm	Presence of stop codon	Completeness
OK006_E_001	Conotoxin precursor	A	A-1	OK006A_TRINITY_DN543_c0_g1_i6_Frame_F3	MGMRRMFTMFLLVVLATAVVSFTSDRASDGRNAAAKAFDRITLTARQGCCAYPDCAADHPELCGGGR*	ATGGGCATGCGGAGGATGTTCACCATGTTTCTGTTGGTTGTCTTGGCAACCGCTGTCGTTTCCTTCACTTCAGATCGTGCATCTGATGGCAGGAATGCCGCAGCCAAAGCGTTTGACCGGATCACTCTGACCGCCAGACAAGGATGCTGTGCCTATCCTGACTGTGCAGCAGATCATCCAGAACTTTGTGGAGGAGGACGCTGA	3.30812	1	1
OK006_E_002	Conotoxin precursor	A	A-1	OK006A_TRINITY_DN543_c0_g1_i11_Frame_F3	MGMRMTFTVFLLVVLATAVVSFTSARASGGRNTAARAFHRTARIGGCCFIKECAVSYPEECKDGFQTLAPPYLKRDMPPSA*	ATGGGCATGCGGATGACGTTCACCGTATTTCTGTTGGTTGTCTTGGCAACTGCTGTCGTTTCCTTCACTTCAGCTCGTGCATCTGGTGGCAGGAATACCGCAGCCAGAGCGTTTCACCGGACCGCTCGGATCGGGGGATGCTGTTTCATTAAAGAATGTGCAGTAAGTTATCCAGAAGAGTGTAAAGATGGATTTCAGACGCTCGCACCACCATACCTGAAACGCGACATGCCGCCCTCTGCCTGA	10.9435	1	1
OK006_E_003	Conotoxin precursor	A	A-1	OK006A_TRINITY_DN543_c0_g1_i7_Frame_F3	MGMRMTFTVFLLVVLATAVVSFTSARASGGRNTAARAFDRTSRRGGHVCCFVKECAEQHPQWCEGGLQTVAPPYLKRDMPPSA*	ATGGGCATGCGGATGACGTTCACCGTATTTCTGTTGGTTGTCTTGGCAACTGCTGTCGTTTCCTTCACTTCAGCTCGTGCATCTGGTGGCAGGAATACCGCAGCCAGAGCGTTTGACCGGACCTCTCGGAGAGGGGGACACGTATGCTGTTTCGTTAAAGAATGTGCAGAACAGCATCCACAATGGTGTGAAGGTGGATTGCAGACGGTCGCACCACCATACCTGAAACGCGACATGCCGCCCTCTGCCTGA	7.45176	1	1
OK006_E_004	Conotoxin precursor	A	A-2	OK006A_TRINITY_DN543_c0_g1_i10_Frame_F3	MGMQMMFTVFLLVVLATAVVSFTSDRASDGRNAVVHERAPELVVTATTTCCGYDPMTICPPCMCTHSCPPKRKPGRRND*	ATGGGCATGCAGATGATGTTCACCGTGTTTCTGTTGGTTGTCTTGGCAACCGCTGTCGTTTCCTTCACTTCAGATCGTGCATCTGATGGCAGGAATGCCGTAGTCCACGAGAGAGCGCCTGAGCTGGTCGTTACGGCCACCACGACTTGCTGTGGTTATGATCCGATGACAATATGCCCTCCTTGCATGTGCACTCATTCCTGTCCACCAAAAAGAAAACCAGGCCGCAGGAACGACTGA	4.71213	1	1
OK006_E_005	Conotoxin precursor	B1		OK006A_TRINITY_DN7355_c0_g1_i4_Frame_R2	MQLYTHLYLLVPLVTFYLILGTGTLGDGGALTERRLADVTALKPEPILLQKSAARSTSDNGKDRLTQMRRIFIKRGNTARGYEEDREVAETVRELDEHGKR*	ATGCAGCTGTACACGCATCTGTATCTGCTGGTGCCCCTGGTGACCTTCTACCTAATCCTAGGCACGGGCACGCTAGGTGATGGAGGCGCACTGACTGAACGCCGTTTGGCTGACGTCACAGCGCTGAAACCTGAGCCCATCCTACTGCAAAAATCCGCTGCCCGCAGCACCAGCGACAATGGCAAGGACAGGCTGACTCAGATGAGGAGGATTTTCATAAAGCGAGGAAACACGGCCAGAGGCTACGAAGAAGATAGAGAGGTAGCAGAGACTGTTAGAGAACTCGATGAACACGGAAAAAGATAA	11.4349	1	1
OK006_E_006	Conotoxin precursor	B1		OK006A_TRINITY_DN7355_c0_g1_i8_Frame_R1	MQLYTHLYLLVPLVTFYLILGTGTLGDGGALTERRLADVTALKPEPILLQKSAARSTSDNGKDRLTQMRRIFIKRGNTARGYENDRETAENIRELEVAGKRKRKRSIKLGVPRDTRQF*	ATGCAGCTGTACACGCATCTGTATCTGCTGGTGCCCCTGGTGACCTTCTACCTAATCCTAGGCACGGGCACGCTAGGTGATGGAGGCGCACTGACTGAACGCCGTTTGGCTGACGTCACAGCGCTGAAACCTGAGCCCATCCTACTGCAAAAATCCGCTGCCCGCAGCACCAGCGACAATGGCAAGGACAGGCTGACTCAGATGAGGAGGATTTTCATAAAGCGAGGAAACACGGCCAGAGGCTACGAAAACGATAGAGAGACTGCGGAGAATATTAGAGAACTTGAAGTAGCAGGAAAAAGAAAAAGAAAAAGATCAATCAAGCTGGGTGTTCCACGTGACACTCGTCAGTTTTAA	21.233	1	1
OK006_E_007	Conotoxin precursor	B1		OK006A_TRINITY_DN7355_c0_g1_i11_Frame_R1	MQLYTHLYLLVPLVTFYLILGTGTLGDGGALTERRLADVTALKPEPILLQKSAARSTSDNGKDRLTQMRRIFIKRGNVATDREEILETIRELNESGKR*	ATGCAGCTGTACACGCATCTGTATCTGCTGGTGCCCCTGGTGACCTTCTACCTAATCCTAGGCACGGGCACGCTAGGTGATGGAGGCGCACTGACTGAACGCCGTTTGGCTGACGTCACAGCGCTGAAACCTGAGCCCATCCTACTGCAAAAATCCGCTGCCCGCAGCACCAGCGACAATGGCAAGGACAGGCTGACTCAGATGAGGAGGATTTTCATAAAGCGAGGAAACGTGGCCACAGACCGCGAAGAGATTTTGGAGACTATTAGAGAATTGAATGAAAGCGGAAAAAGATAA	9.28596	1	1
OK006_E_008	Conotoxin precursor	B1		OK006A_TRINITY_DN7355_c0_g1_i6_Frame_R1	MQLYTHLYLLVPLVTFYLILGTGTLGDGGALTERRLADVTALKPEPILLQKSAARSTSDNGKDRLTQMRRIFIKRGNTARGYEDDAEDVEYIGDLEEL*	ATGCAGCTGTACACGCATCTGTATCTGCTGGTGCCCCTGGTGACCTTCTACCTAATCCTAGGCACGGGCACGCTAGGTGATGGAGGCGCACTGACTGAACGCCGTTTGGCTGACGTCACAGCGCTGAAACCTGAGCCCATCCTACTGCAAAAATCCGCTGCCCGCAGCACCAGCGACAATGGCAAGGACAGGCTGACTCAGATGAGGAGGATTTTCATAAAGCGAGGAAACACGGCCAGAGGCTACGAAGACGATGCAGAGGATGTGGAGTATATTGGAGACCTCGAAGAACTTTGA	53.5241	1	1
OK006_E_009	Conotoxin precursor	B1		OK006A_TRINITY_DN7355_c0_g1_i13_Frame_R1	MQLYTHLYLLVPLVTFYLILGTGTLGDGGALTERRLADVTALKPEPILLQKSAAGSTDDKGKDRLTQMKRILKKRGSEEAEEIREAMESLHELSR	ATGCAGCTGTACACGCATCTGTATCTGCTGGTGCCCCTGGTGACCTTCTACCTAATCCTAGGCACGGGCACGCTAGGTGATGGAGGCGCACTGACTGAACGCCGTTTGGCTGACGTCACAGCGCTGAAACCTGAGCCCATCCTACTGCAAAAATCCGCTGCCGGCAGCACCGACGACAAAGGCAAGGACAGGTTGACTCAGATGAAGAGGATTCTCAAAAAGCGAGGAAGCGAGGAAGCCGAAGAAATTAGAGAGGCTATGGAGTCTCTTCATGAACTCTCGAGA	0.772051	0	0
OK006_E_010	Conotoxin precursor	B2		OK006A_TRINITY_DN4491_c2_g1_i1_Frame_R2	RLIIAAVLASACLAFPQRRDGAPANVDHNLQPFGGALTIPNMQPMQGMTGMPSPQFLPFNPNFAVGLKRKNLEKRRHNPQFSDNNQSPFGSEGDLDSFMNFMQENGNNLPFADVNSAATDLGHFEPSDENEAGKFHFFDKEQ*	CGACTGATAATCGCGGCCGTCCTCGCCTCCGCCTGCCTCGCTTTCCCTCAAAGAAGGGATGGCGCCCCCGCAAACGTCGACCACAACCTCCAGCCCTTTGGTGGGGCATTGACAATACCAAACATGCAGCCCATGCAGGGAATGACCGGAATGCCCAGTCCTCAATTCCTGCCTTTCAACCCTAACTTTGCCGTGGGATTGAAGAGGAAGAACCTAGAGAAGAGGAGACATAACCCTCAGTTCAGCGACAACAACCAATCTCCCTTTGGCTCGGAGGGTGATCTAGACAGCTTCATGAACTTCATGCAGGAAAACGGCAACAACCTTCCTTTCGCGGACGTGAATAGCGCAGCCACCGACCTTGGCCACTTCGAGCCCAGTGACGAAAACGAGGCCGGC…	71.3838	1	0
OK006_E_011	Conotoxin precursor	B2		OK006A_TRINITY_DN12721_c0_g1_i15_Frame_F2	MLRLIIAAVLASAFLAFPQRRDGAPANVDPNLQPFGGALTIPNMQPMQGMTGMPSPQFLPFNPNFAVGLKRENIEKRRHNPQFSDNNQSPFGSEGDLDSFMNFMKENGNNLPFADVNSAATDLGHFEPSDENEAGKYRFFDKEQ*	ATGTTGCGACTGATAATCGCCGCCGTCCTCGCCTCCGCCTTCCTCGCTTTCCCTCAAAGAAGGGATGGCGCCCCCGCAAACGTCGATCCCAACCTCCAGCCCTTTGGTGGGGCATTGACAATACCTAACATGCAGCCCATGCAGGGAATGACCGGAATGCCCAGTCCTCAATTCCTGCCTTTCAACCCTAACTTTGCCGTGGGATTGAAGAGGGAGAACATAGAGAAGAGGAGACATAACCCTCAGTTCAGCGACAACAACCAATCTCCCTTTGGCTCGGAGGGTGACCTAGACAGCTTCATGAACTTCATGAAGGAAAACGGCAACAACCTTCCTTTCGCGGACGTGAATAGCGCCGCCACCGACCTTGGCCACTTCGAGCCCAGTGACGAAAACGAG…	13071.5	1	1
OK006_E_012	Conotoxin precursor	B2		OK006A_TRINITY_DN2_c26_g1_i10_Frame_F1	MLRLIIAAVLASACLAFPQRRDGAPENADPNLQPFGGALTIPNMQPMQGMTGMPSPQFLPFNPNFAVGLKRENLEKRRHNPQFSDNNQSPFGSEGDLDSFMNFMKENGNNLPFANMDSAATDLGHFEPSAENEAGKFRFFDKEQ*	ATGTTGCGACTGATAATCGCCGCCGTCCTCGCCTCCGCCTGCCTCGCTTTCCCTCAAAGAAGGGATGGCGCCCCCGAAAACGCCGATCCCAACCTCCAGCCCTTTGGTGGGGCATTGACAATACCAAACATGCAGCCCATGCAGGGAATGACCGGAATGCCCAGTCCTCAATTCCTGCCTTTCAACCCTAACTTTGCCGTGGGATTGAAGAGGGAGAACCTAGAGAAGAGGAGACATAACCCTCAGTTCAGCGACAACAACCAATCTCCCTTTGGCTCGGAGGGTGACCTAGACAGCTTCATGAACTTCATGAAGGAAAACGGCAACAACCTTCCTTTCGCGAACATGGACAGCGCCGCCACCGACCTTGGCCACTTCGAGCCCAGCGCCGAAAATGAG…	44872	1	1
OK006_E_013	Conotoxin precursor	B2		OK006A_TRINITY_DN4491_c2_g1_i4_Frame_R1	MLRLIIAAVLASASLAFPQRRNGAPANVDPNLQPSGGALTIPIMQPLQGMTGMPSPQFLPFNPNFAVGLKRKNLEKRRHNPQFSDNNQSPFGSEGDLDSFMNFMQENGNNLPFADVNSAATDLGHFEPSDENEAGKFHFFDKEQ*	ATGTTGCGACTGATAATCGCCGCCGTCCTCGCCTCCGCCAGCCTCGCTTTCCCTCAAAGAAGGAATGGCGCCCCCGCAAACGTCGATCCCAACCTCCAGCCCTCTGGTGGGGCATTGACAATACCAATCATGCAGCCCCTGCAGGGAATGACCGGAATGCCCAGTCCTCAATTCCTGCCTTTCAACCCTAACTTTGCCGTGGGATTGAAGAGGAAGAACCTAGAGAAGAGGAGACATAACCCTCAGTTCAGCGACAACAACCAATCTCCCTTTGGCTCGGAGGGTGATCTAGACAGCTTCATGAACTTCATGCAGGAAAACGGCAACAACCTTCCTTTCGCGGACGTGAATAGCGCAGCCACCGACCTTGGCCACTTCGAGCCCAGTGACGAAAACGAG…	105.188	1	1
OK006_E_014	Conotoxin precursor	B2		OK006A_TRINITY_DN38529_c1_g1_i1_Frame_R1	VGLKRENLEKRRNNPQFSDNIQSPFGSERDLVRFMNFMKENGNILSFADVNSAATDLGHFEPSDENEAGKCRFFDKEQ*	GTGGGATTGAAGAGGGAGAACCTAGAGAAGAGGAGAAATAACCCTCAGTTCAGCGACAACATCCAATCTCCCTTTGGCTCGGAGCGTGACCTAGTCAGATTCATGAACTTCATGAAGGAAAACGGCAACATCCTTTCTTTCGCGGACGTGAATAGCGCCGCAACCGACCTTGGCCACTTCGAGCCCAGTGACGAAAACGAGGCCGGCAAGTGCCGCTTCTTTGACAAGGAACAATAA	16.5859	1	0
OK006_E_015	Conotoxin precursor	B2		OK006A_TRINITY_DN1032_c9_g1_i1_Frame_F1	MLRLIIAAVLDSACLAFPQRRDAAPENADPNLQPFGEALTIPNMQPMQGMTGMSSPQFLPFIPNFAVGLKREILEKRSHNPQFSDNNQSLFGSEGD	ATGTTGAGACTGATAATCGCCGCCGTCCTCGACTCCGCCTGCCTCGCTTTCCCGCAAAGAAGGGATGCCGCCCCCGAAAACGCCGATCCCAACCTCCAGCCCTTTGGTGAGGCATTGACAATACCAAACATGCAGCCCATGCAGGGAATGACCGGAATGTCCAGTCCTCAATTCCTGCCTTTCATCCCTAACTTTGCCGTGGGATTGAAGAGGGAGATCCTAGAGAAGAGGAGTCATAACCCTCAGTTCAGCGACAATAACCAATCTCTCTTTGGCTCGGAGGGTGAC	5.1352	0	0
OK006_E_016	Conotoxin precursor	B2		OK006A_TRINITY_DN2_c26_g1_i4_Frame_F1	MLRLIIAAVLASACLAFPQRRDGAPANAAPNLQPFNGEMAMPNMQPMHALPMSMSGMSSPQLMPLNPNLGMGFKRENLEKRRQHSQFSDDNKSPFDSEDGLGNFMNFMKENGNNLPFANMDSAATDLGHFEPSAENEAGKFRFFDKEQ*	ATGTTGCGACTGATAATCGCCGCCGTCCTCGCCTCCGCCTGCCTCGCTTTCCCTCAAAGAAGGGATGGCGCCCCCGCAAACGCCGCCCCCAACCTCCAGCCCTTTAATGGGGAAATGGCCATGCCCAACATGCAGCCCATGCACGCATTGCCCATGTCCATGTCCGGAATGTCCAGTCCTCAATTGATGCCTTTGAACCCTAACCTTGGCATGGGATTCAAGAGGGAGAACCTAGAGAAGAGAAGACAGCACTCTCAGTTCAGCGACGACAACAAATCTCCCTTTGACTCGGAGGATGGCCTAGGAAACTTCATGAACTTCATGAAGGAAAACGGCAACAACCTTCCTTTCGCGAACATGGACAGCGCCGCCACCGACCTTGGCCACTTCGAGCCCAGC…	378.218	1	1
OK006_E_017	Conotoxin precursor	C		OK006A_TRINITY_DN3025_c0_g1_i1_Frame_F1	MQTAYWVVMGMMMVWITAPLSGGGKLNDVIRGLVPDDLTLQRMFKSLFSHRLSGGRNSTVHICMWKVCPPPPWRRPHGKR*	ATGCAGACGGCCTACTGGGTGGTGATGGGGATGATGATGGTGTGGATTACAGCCCCTCTGTCTGGAGGTGGTAAACTGAACGACGTAATTCGGGGTTTGGTGCCAGACGACTTAACCCTACAGCGTATGTTCAAAAGTCTGTTTTCCCATCGTCTTTCTGGCGGCAGAAATTCGACGGTACACATATGTATGTGGAAGGTATGTCCACCTCCCCCATGGAGACGACCACATGGAAAAAGATGA	4.26785	1	1
OK006_E_018	Conotoxin precursor	Con-ikot-ikot	Con-ikot-ikot-2	OK006A_TRINITY_DN378_c0_g1_i5_Frame_F2	MAMNMWMTISVCVVVVMATTVVGSTPLQERGLSLDERRAIGCCAWQVYDCLVQRGHYWYICYSWASWICTRGLSDRCCPGLERCIRRCVSGYKNVCYYHCIFESC*	ATGGCCATGAACATGTGGATGACGATCAGCGTGTGTGTAGTGGTTGTCATGGCGACCACTGTCGTTGGCTCCACTCCGTTACAAGAACGAGGCCTCAGCCTCGATGAACGCCGTGCCATTGGATGTTGCGCCTGGCAAGTTTATGACTGTCTCGTACAACGGGGGCACTATTGGTATATTTGCTACAGCTGGGCCTCCTGGATTTGTACACGTGGCCTTTCTGATAGATGTTGCCCTGGACTTGAGCGCTGTATTCGAAGATGCGTGTCGGGCTATAAAAACGTCTGCTATTACCACTGCATATTTGAAAGTTGCTGA	91018.2	1	1
OK006_E_019	Conotoxin precursor	Con-ikot-ikot	Con-ikot-ikot-2	OK006A_TRINITY_DN38689_c0_g1_i1_Frame_F1	MAMNMWMTISGCVVDVMATTVVGSSLLQERGLSLDERRAIGCCAWQVYDCLVQQGHNWYICFSWASWVCTRRLSDRCCA	ATGGCCATGAACATGTGGATGACGATCAGCGGGTGTGTAGTTGACGTCATGGCGACCACTGTCGTTGGCTCCTCTCTGTTACAAGAACGAGGCCTCAGCCTCGATGAACGACGTGCCATTGGATGTTGCGCCTGGCAAGTTTATGACTGTCTCGTACAACAGGGGCACAATTGGTATATTTGCTTCAGCTGGGCCTCCTGGGTTTGTACACGTCGCCTTTCTGATAGATGTTGCGCT	26.0826	0	0
OK006_E_020	Conotoxin precursor	Con-ikot-ikot	Con-ikot-ikot-2	OK006A_TRINITY_DN2992_c0_g1_i1_Frame_F1	MAMNMSMTISVCVVVVMATTVVGSTPSQEQGLSLDKRGDVGCCAWEVYDCLIQRRSHFYICYSWASWICTRDLSDGCCPRLGGCIRRCVWGDRDLCYYHCIVARC*	ATGGCCATGAACATGTCGATGACGATCAGTGTGTGTGTAGTGGTTGTCATGGCGACCACTGTCGTTGGCTCCACTCCGTCACAAGAACAAGGCCTCAGCCTCGATAAACGCGGTGACGTTGGATGTTGCGCCTGGGAAGTTTATGACTGTCTCATACAACGAAGGAGCCATTTCTATATTTGCTACAGCTGGGCCTCCTGGATTTGTACACGTGACCTTTCTGATGGATGTTGCCCTAGACTTGGGGGCTGTATTCGAAGATGCGTGTGGGGCGATAGAGACCTCTGCTATTACCACTGCATAGTTGCACGTTGCTGA	7.01919	1	1
OK006_E_021	Conotoxin precursor	Con-ikot-ikot	Con-ikot-ikot-4	OK006A_TRINITY_DN7921_c1_g1_i1_Frame_F3	MAMNVWMTISVFVVVVMATTVIGSTVSHEQKRDRSSRKCCATKAYQCLRDHKCFEPIDYKCGQPCKNTDTTSCRPTAGDNCCMIYKHCLVECQIFRSDRRGDQLLYCYELCSDSCTYTG*	ATGGCCATGAACGTGTGGATGACGATCAGCGTGTTTGTAGTGGTTGTCATGGCAACCACTGTCATTGGCTCCACTGTATCACATGAACAAAAACGCGACCGCAGCAGCAGAAAATGTTGCGCCACAAAAGCATACCAATGTCTTCGAGATCATAAATGCTTTGAACCGATTGATTACAAGTGTGGGCAACCGTGCAAAAATACAGATACTACAAGCTGTAGACCTACTGCTGGTGACAACTGTTGCATGATTTACAAGCACTGTCTGGTGGAATGCCAGATTTTTCGTTCAGATAGACGCGGAGATCAACTGCTTTACTGCTATGAACTTTGCAGCGACTCGTGTACGTACACAGGATAG	1.18692	1	1
OK006_E_022	Conotoxin precursor	Con-ikot-ikot	Con-ikot-ikot-4	OK006A_TRINITY_DN7921_c1_g1_i4_Frame_F3	MAMNVWMTISVFVVVVMATTVIGSTVSHEQKRDRSSRKCCATKAYQCLRDHKCFEPIDYKCGQPCKNTDTTSCRPTAGDNCCMIYKHCLVECQIFRSDRRGDQLLYCYELCSDSYPC*	ATGGCCATGAACGTGTGGATGACGATCAGCGTGTTTGTAGTGGTTGTCATGGCAACCACTGTCATTGGCTCCACTGTATCACATGAACAAAAACGCGACCGCAGCAGCAGAAAATGTTGCGCCACAAAAGCATACCAATGTCTTCGAGATCATAAATGCTTTGAACCGATTGATTACAAGTGTGGGCAACCGTGCAAAAATACAGATACTACAAGCTGTAGACCTACTGCTGGTGACAACTGTTGCATGATTTACAAGCACTGTCTGGTGGAATGCCAGATTTTTCGTTCAGATAGACGCGGAGATCAACTGCTTTACTGCTATGAACTTTGCAGCGACTCGTACCCTTGTTAG	7.01096	1	1
OK006_E_023	Conotoxin precursor	Conkunitzin	Conkunitzin-3	OK006A_TRINITY_DN424_c3_g1_i2_Frame_R3	MEGRGLAVVLILASCMSALTVGDKRSLPAVCLQPVVVGPCAASVQRYYFNHHSDICQPFVYGGCNGNGNRFITMAACVNTCKSPSVAIVVD*	ATGGAGGGACGTGGTTTGGCTGTTGTTCTGATTCTGGCCAGTTGTATGTCTGCCTTGACTGTTGGCGATAAGAGATCACTACCTGCCGTGTGCCTTCAACCCGTGGTGGTTGGGCCGTGCGCAGCCAGCGTCCAAAGGTATTACTTCAACCACCATTCAGACATCTGCCAGCCGTTCGTTTACGGGGGATGTAACGGCAACGGAAACAGATTTATTACCATGGCTGCGTGCGTGAATACATGCAAAAGCCCGTCGGTGGCAATTGTAGTTGACTGA	5.70549	1	1
OK006_E_024	Conotoxin precursor	Conkunitzin	Conkunitzin-3	OK006A_TRINITY_DN29478_c0_g1_i1_Frame_R3	VVLILTSCLSALTVGDKRSVPDVCLQPMVVGSCRGKFTRYYFNSCLGMCQPFDYGGCDGNGNRFKTMDACLNKCEIPWERIQGD*	GTTGTTCTGATTCTGACCAGTTGTCTGTCTGCCTTGACTGTTGGCGATAAGAGATCAGTACCTGACGTGTGCCTTCAACCCATGGTGGTTGGGTCGTGCAGAGGCAAATTCACACGCTATTACTTCAACAGCTGTTTAGGCATGTGCCAGCCGTTCGATTACGGGGGATGTGACGGCAACGGAAACAGATTTAAGACCATGGATGCGTGCCTGAATAAATGCGAAATCCCGTGGGAGCGAATTCAAGGTGACTGA	3.99306	1	0
OK006_E_025	Conotoxin precursor	Conkunitzin	Conkunitzin-5	OK006A_TRINITY_DN42329_c0_g1_i1_Frame_R1	MATFNIVLAALFASVILVDFAVQARRCHPPCEYGERCVSANRRERRHRHNNVCVPVRCLFQARRGRCLNFDRRYHFNTLTMSCTRVHTGACYGRNNRFSSSENCELTCAPRR*	ATGGCCACTTTCAACATCGTCCTCGCTGCTTTGTTCGCTTCTGTTATCCTTGTCGACTTTGCTGTTCAGGCAAGACGGTGCCACCCGCCATGCGAATACGGGGAACGTTGTGTATCTGCCAACAGGCGAGAGAGAAGACACCGCCACAACAATGTCTGTGTGCCTGTACGCTGCCTGTTCCAAGCCCGGCGGGGCCGCTGCCTCAACTTCGATCGTCGCTACCACTTCAACACCTTGACCATGAGCTGCACGCGCGTGCACACGGGCGCCTGCTACGGCCGCAACAACCGCTTCAGCTCCAGCGAGAACTGCGAACTGACCTGCGCCCCGAGACGATGA	0.740356	1	1
OK006_E_026	Conotoxin precursor	Conkunitzin	Conkunitzin-7	OK006A_TRINITY_DN3025_c0_g2_i1_Frame_F1	MEGRRFAAVLILTICMLELGAGIPQSQCIQPPYTGPCEKYTARYFFDKASHDCKMFI	ATGGAGGGACGTCGTTTTGCTGCTGTTCTGATCCTGACCATCTGTATGCTTGAACTTGGGGCTGGTATTCCACAGAGTCAATGCATACAACCACCGTATACGGGACCGTGCGAGAAGTATACGGCAAGATATTTCTTCGATAAAGCTTCTCACGACTGTAAAATGTTCATT	2.15307	0	0
OK006_E_027	Conotoxin precursor	Conkunitzin	Conkunitzin-8	OK006A_TRINITY_DN32708_c0_g1_i1_Frame_R2	EGLPSLCSLPKVVGPCRALIPRFYFNSTQLECLPFAYGGCDGNDNNFETYSDCQASCR*	GAAGGTTTGCCGTCGCTGTGTTCGCTGCCCAAAGTGGTGGGCCCATGCAGGGCCTTAATCCCCCGTTTCTACTTCAACAGCACCCAGCTAGAGTGCCTTCCCTTTGCCTACGGAGGCTGCGATGGCAACGACAATAACTTTGAGACGTATTCTGACTGTCAGGCGTCGTGCCGCTGA	0.65868	1	0
OK006_E_028	Conotoxin precursor	Conkunitzin	Conkunitzin-9	OK006A_TRINITY_DN6519_c0_g1_i1_Frame_F1	MDARRVVAVLLVLSMARSVTGKDPRCYEPLDSGDSRGPTQSTRFYYNQEKKKCQTFQCTECGGNGNNFPDLYACKECCEWDMTCY*	ATGGACGCACGTCGTGTAGTTGCCGTTCTCCTGGTTCTCTCCATGGCCCGCTCTGTGACAGGAAAAGATCCGAGGTGCTACGAGCCCTTGGATTCGGGGGATTCCAGGGGCCCTACCCAAAGCACAAGGTTCTATTACAACCAAGAAAAAAAGAAATGTCAAACCTTTCAGTGCACTGAATGTGGAGGCAACGGCAACAACTTTCCCGATCTCTATGCCTGTAAAGAATGTTGCGAGTGGGACATGACTTGTTATTAA	1.94688	1	1
OK006_E_029	Conotoxin precursor	Conkunitzin	Conkunitzin-12	OK006A_TRINITY_DN35053_c0_g1_i1_Frame_F1	MDALRFSAVLLILAMACFITVSAGACEKPKVEGTGSQSISSYFFNSASGTCDTFVYKGGNDDPFPNRFNSHPVCENVCKCKLRMDPGTGERLRTRYYHNTDGSRCLPFQYRGTGGNANNFLSESACEMECEL*	ATGGACGCACTACGTTTTTCTGCCGTTCTTCTGATTCTGGCCATGGCCTGCTTTATAACAGTGTCGGCAGGGGCTTGCGAAAAACCCAAGGTCGAAGGAACCGGGAGTCAAAGTATCAGCAGTTACTTCTTCAACAGTGCTAGCGGCACGTGCGACACGTTTGTCTACAAAGGAGGAAACGACGACCCGTTCCCCAATAGGTTTAACAGCCATCCCGTCTGTGAGAATGTTTGCAAGTGCAAACTAAGGATGGATCCGGGGACAGGCGAAAGACTCCGAACCAGGTATTATCACAACACTGACGGCAGCAGGTGCCTACCTTTTCAGTACCGAGGAACTGGAGGCAACGCGAACAACTTTCTTTCGGAGTCGGCATGTGAGATGGAGTGCGAGTTATAG	2.61924	1	1
OK006_E_030	Conotoxin precursor	D	D-1	OK006A_TRINITY_DN3524_c0_g1_i6_Frame_R3	MPRLEMMLLVLLILPLPYFNAAGGQAVPGDGQGDGLDSYLLRGDRAVYRACYYHQPYSPWGRCCPTKMCGSMCCDRANCRCVSHADRGQGCSC*	ATGCCAAGACTGGAAATGATGCTGCTGGTTCTGCTGATTTTGCCTCTGCCCTATTTTAATGCGGCAGGGGGGCAAGCGGTACCAGGGGACGGGCAAGGCGATGGATTGGACAGTTACCTCCTACGTGGTGACAGAGCCGTTTATAGGGCGTGCTACTATCATCAACCATACTCACCATGGGGACGGTGCTGCCCGACCAAGATGTGCGGTAGTATGTGCTGTGACCGGGCGAACTGCCGCTGCGTCTCTCATGCAGACAGGGGACAGGGGTGTTCCTGCTGA	2.76585	1	1
OK006_E_031	Conotoxin precursor	D	D-1	OK006A_TRINITY_DN3524_c0_g1_i14_Frame_R3	MPRLEMMLLVLLILPLPYFNAAGGQAVPGDGQGDGLDSYLLRGDRAVHRACYTSQP	ATGCCAAGACTGGAAATGATGCTGCTGGTTCTGCTGATTTTGCCTCTGCCCTATTTTAATGCGGCAGGGGGGCAAGCGGTACCAGGGGACGGGCAAGGCGATGGATTGGACAGTTACCTCCTACGTGGTGACAGAGCCGTTCATAGGGCGTGCTACACTAGTCAACCA	1.20943	0	0
OK006_E_032	Conotoxin precursor	D	D-2	OK006A_TRINITY_DN3524_c1_g1_i1_Frame_R1	MRKVEMMILVMLILPLCYIDAVGPPPPWNMEDEIIEHWQKLHCHEISDLTPWILCSPEPLCGGKGCCAQEVCDCSGPACTCPPCL*	ATGCGGAAAGTAGAGATGATGATACTGGTTATGCTGATTTTGCCCCTGTGCTATATTGATGCGGTAGGACCACCGCCACCATGGAACATGGAAGATGAAATTATTGAACATTGGCAAAAGCTTCATTGTCATGAAATTTCAGATCTCACACCATGGATACTGTGCAGCCCGGAACCACTTTGCGGTGGAAAAGGCTGCTGTGCCCAGGAAGTCTGCGACTGCTCTGGACCAGCTTGTACATGCCCGCCATGTCTATAG	2.36407	1	1
OK006_E_033	Conotoxin precursor	E	E-1	OK006A_TRINITY_DN26668_c0_g1_i1_Frame_F2	MTRVFLAMFFLLALTEGWPRLYDRDCERGRNMHYTCTQLEQCGVIRKMNGQLTCELRCSCTPGKSCLHGENIDWDNMNTKIYHCPWP*	ATGACGCGTGTGTTCCTTGCGATGTTCTTCCTCTTGGCGCTAACAGAGGGATGGCCACGTCTGTATGATAGGGACTGTGAGAGGGGGCGAAATATGCATTACACGTGCACACAATTAGAGCAGTGTGGGGTCATTCGTAAGATGAACGGACAATTGACGTGCGAGCTGAGATGTAGCTGTACACCTGGAAAAAGCTGTCTTCACGGTGAAAACATCGATTGGGATAACATGAATACCAAAATCTACCACTGCCCGTGGCCCTAG	12.2094	1	1
OK006_E_034	Conotoxin precursor	F	F-1	OK006A_TRINITY_DN387_c0_g1_i27_Frame_R1	MQRGAMLLGVVAFLALWSQAAADVYDLMDPDVLAMIDVGKKMMHACSIANKHIDDPWWMLDVLDFKEKSVYYTMMSDLVTCLNHFSRIRFEEP*	ATGCAGAGAGGGGCCATGCTGCTTGGGGTGGTCGCCTTCCTTGCCCTGTGGTCCCAGGCCGCTGCCGATGTGTATGATTTGATGGATCCTGACGTGTTGGCCATGATCGACGTGGGAAAGAAAATGATGCACGCCTGTTCCATAGCCAATAAACACATTGACGACCCATGGTGGATGTTGGACGTTTTGGACTTTAAAGAAAAGAGTGTATACTATACAATGATGAGCGATTTGGTAACCTGCCTGAACCATTTTTCCCGGATAAGATTTGAGGAACCTTAA	0.984548	1	1
OK006_E_035	Conotoxin precursor	F	F-1	OK006A_TRINITY_DN387_c0_g1_i15_Frame_R1	MQRGAMLLGVVAFLALWSQAAADVYDLMDPDVLAMIDVGKKMMHACSIANKHIDDPWWMLDVLDFKEKSVYYTMMSDLVTCLNHFSRRRHEEH*	ATGCAGAGAGGGGCCATGCTGCTTGGGGTGGTCGCCTTCCTTGCCCTGTGGTCCCAGGCCGCTGCCGATGTGTATGATTTGATGGATCCTGACGTGTTGGCCATGATCGACGTGGGAAAGAAAATGATGCACGCCTGTTCCATAGCCAATAAACACATTGACGACCCATGGTGGATGTTGGACGTTTTGGACTTTAAAGAAAAGAGTGTATACTATACAATGATGAGCGATTTGGTAACCTGCCTGAACCATTTTTCCCGGAGAAGACATGAAGAACATTAA	17.0703	1	1
OK006_E_036	Conotoxin precursor	F	F-1	OK006A_TRINITY_DN387_c0_g1_i24_Frame_R1	MQRGAMLLGVVAFLALWSQAAAEEYDLNDPDVLAIVDEGQKLMHACSIANKYTYDPWWKLNILAFKEMRVYHSMMSDMVTCLNHFSRRRHEEH*	ATGCAGAGAGGGGCCATGCTGCTTGGGGTGGTCGCCTTCCTTGCCCTGTGGTCCCAGGCCGCTGCCGAGGAGTACGATTTGAACGATCCTGACGTGTTGGCCATAGTCGACGAGGGACAGAAATTGATGCACGCCTGTTCCATTGCCAATAAATACACATACGACCCATGGTGGAAGTTGAACATTTTGGCCTTTAAAGAAATGAGAGTATACCATTCAATGATGAGCGATATGGTAACCTGCCTGAACCATTTTTCCCGGAGAAGACATGAAGAACATTAA	94081.9	1	1
OK006_E_037	Conotoxin precursor	F	F-1	OK006A_TRINITY_DN7771_c1_g1_i1_Frame_R1	MHRGAMLLGVVVFLALWSQAAAEEYDLNDPDVLAIVDEGQKLMHACSIANKYTYNPWWKLNILAFKE	ATGCACAGAGGGGCCATGCTGCTTGGGGTGGTCGTCTTCCTTGCCCTGTGGTCCCAGGCCGCTGCCGAGGAGTACGATTTGAACGATCCTGACGTCTTGGCCATAGTAGACGAGGGACAGAAATTGATGCACGCATGTTCCATTGCCAATAAATACACATACAACCCATGGTGGAAGTTGAACATTTTGGCCTTTAAAGAA	14.7112	0	0
OK006_E_038	Conotoxin precursor	F	F-1	OK006A_TRINITY_DN5437_c3_g1_i1_Frame_R2	MQRGAVLLGVVAFLALWSQAAAEEYDFNDPDVLAIDDEGQKLMHACSIANKYTYDPWWKLNILAFKEMRVYHSMMSDMVTCLIHFLRRRYEEH*	ATGCAGAGAGGGGCTGTGCTGCTTGGTGTGGTCGCCTTCCTTGCCCTGTGGTCCCAGGCCGCTGCCGAGGAGTACGATTTTAACGATCCTGACGTGTTGGCCATAGACGACGAGGGACAGAAATTGATGCACGCCTGTTCCATTGCCAATAAATACACATACGACCCATGGTGGAAGTTGAACATTTTGGCCTTTAAAGAAATGAGAGTATACCATTCAATGATGAGCGATATGGTAACCTGCCTGATCCATTTTTTACGGAGAAGATATGAAGAACATTAA	21.5733	1	1
OK006_E_039	Conotoxin precursor	F	F-1	OK006A_TRINITY_DN10409_c0_g1_i1_Frame_R1	MQRGAMLLWVVAFLALWSQAAADVYDLNDPDVLAMVDEGQKLMHACSIANKYTYDPWWKLNILAFKEMRVYHSMMNDMVTCLNHFSR	ATGCAGAGAGGGGCCATGCTGCTTTGGGTGGTCGCCTTCCTTGCCCTGTGGTCCCAGGCCGCTGCCGATGTGTATGATTTGAACGATCCTGACGTGTTGGCCATGGTCGACGAGGGACAGAAATTGATGCACGCCTGTTCCATTGCCAATAAATACACATACGACCCATGGTGGAAGTTAAACATTTTGGCCTTTAAAGAAATGAGAGTATACCATTCAATGATGAACGATATGGTAACCTGCCTGAACCATTTTTCCCGG	304.262	0	0
OK006_E_040	Conotoxin precursor	F	F-1	OK006A_TRINITY_DN16572_c0_g1_i1_Frame_F3	MQRGAVLLGVVAFLALWSQAAAEENDLNDPDVLAIVDEGQKMMHACSIANKYTSDPWWKLNILAFKKMRVYPSMMGDM	ATGCAGAGAGGGGCCGTGTTGCTCGGGGTGGTCGCCTTCCTTGCCCTGTGGTCCCAGGCCGCTGCCGAGGAGAACGATTTGAACGATCCTGACGTGTTGGCCATAGTCGACGAGGGACAGAAAATGATGCACGCCTGTTCCATTGCCAATAAATACACATCCGACCCATGGTGGAAGTTGAACATTTTGGCCTTTAAAAAAATGAGAGTATACCCTTCAATGATGGGCGATATG	199.676	0	0
OK006_E_041	Conotoxin precursor	F	F-2	OK006A_TRINITY_DN5437_c0_g1_i11_Frame_R3	MQRGAVLLGVVAFLALWPQAAARVYDLNEPDVWGMVDYAQRAMHSCAIVNDYDDRKWSSYNAMEFKDRSLFRTMVTDLQGCLNYFFQIRP*	ATGCAGAGAGGGGCCGTGCTGCTCGGGGTGGTCGCCTTCCTTGCCCTGTGGCCCCAGGCCGCTGCCAGGGTGTACGATTTGAACGAGCCTGACGTGTGGGGCATGGTCGACTATGCACAGAGAGCGATGCATTCCTGTGCCATAGTGAATGACTACGACGACAGGAAATGGTCGAGTTACAACGCTATGGAATTTAAAGACAGGAGTCTATTCCGAACAATGGTGACCGACTTGCAAGGCTGCCTGAACTATTTTTTCCAGATAAGACCATGA	2.16008	1	1
OK006_E_042	Conotoxin precursor	F	F-2	OK006A_TRINITY_DN5437_c0_g1_i19_Frame_R3	MQRGAVLLGVVAFLALWPQAAARVYDLNEPDVWGMVDYAQRAMHSCAIVNDYDDRKWSSYNAMEFKDRSLFRTMVSDLDGCLIYFFDIRP*	ATGCAGAGAGGGGCCGTGCTGCTCGGGGTGGTCGCCTTCCTTGCCCTGTGGCCCCAGGCCGCTGCCAGGGTGTACGATTTGAACGAGCCTGACGTGTGGGGCATGGTCGACTATGCACAGAGAGCGATGCATTCCTGTGCCATAGTGAATGACTACGACGACAGGAAATGGTCGAGTTACAACGCTATGGAATTTAAAGACAGGAGTCTATTCCGTACAATGGTGAGCGACTTGGATGGCTGCCTGATCTATTTTTTCGACATAAGACCATGA	0	1	1
OK006_E_043	Conotoxin precursor	F	F-2	OK006A_TRINITY_DN5437_c0_g1_i1_Frame_R3	MQRGAVLLGVVAFLALWPQAAARVYDLNEPNVWDMVNFAQRLMDSCAIVNDYDDRKWSSYNAMEFKDRSLFRTMVSDLDGCLIYFFDIRP*	ATGCAGAGAGGGGCCGTGCTGCTCGGGGTGGTCGCCTTCCTTGCCCTGTGGCCCCAGGCCGCTGCCAGGGTGTACGATTTGAACGAGCCTAACGTGTGGGACATGGTCAACTTTGCACAGAGACTGATGGATTCCTGTGCCATAGTGAATGACTACGACGACAGGAAATGGTCGAGTTACAACGCTATGGAATTTAAAGACAGGAGTCTATTCCGTACAATGGTGAGCGACTTGGATGGCTGCCTGATCTATTTTTTCGACATAAGACCATGA	8.97266	1	1
OK006_E_044	Conotoxin precursor	F	F-2	OK006A_TRINITY_DN5437_c0_g1_i21_Frame_R3	MQRGAVLLGVVAFLALWPQAAARVYDLYEPDVWTMVDYAQIVMHFCAIVNDYDDRKWSSYNAMEFKDRSLFQAMVTDLRGCLNHFFQIRP*	ATGCAGAGAGGGGCCGTGCTGCTCGGGGTGGTCGCCTTCCTTGCCCTGTGGCCCCAGGCCGCTGCCAGGGTGTACGATTTGTACGAGCCTGACGTGTGGACCATGGTCGACTATGCACAGATAGTGATGCATTTCTGTGCCATAGTGAATGACTACGACGACAGGAAATGGTCGAGTTACAACGCTATGGAATTTAAAGACAGGAGTCTATTCCAAGCAATGGTGACCGACTTGCGAGGCTGCCTGAACCATTTTTTCCAGATAAGACCATGA	3.71091	1	1
OK006_E_045	Conotoxin precursor	F	F-2	OK006A_TRINITY_DN5437_c0_g2_i1_Frame_R1	RLMHSCALANRYGSNVWSTYNVGAFKERRLYHSMEIDLVRCLNYFLETRQ*	AGACTGATGCATTCCTGTGCATTAGCCAATAGATACGGAAGCAACGTATGGTCGACGTACAACGTTGGGGCCTTTAAAGAGAGGCGTCTATACCATTCAATGGAGATCGACTTGGTACGCTGCCTGAACTATTTTCTCGAGACAAGACAATGA	1.47341	1	0
OK006_E_046	Conotoxin precursor	F	F-2	OK006A_TRINITY_DN2788_c0_g1_i2_Frame_R1	MQRGAVLLGVVAFLGLLPQAAAKVYNLHETEVWAVVAYSKRVMHACAIANSHMDNPWAVVDVKDFEERSLYH	ATGCAGAGAGGGGCCGTGCTGCTCGGGGTGGTCGCCTTCCTTGGCCTGTTGCCCCAGGCCGCTGCCAAGGTGTACAATTTGCACGAAACTGAAGTGTGGGCCGTGGTCGCCTATTCAAAGAGAGTGATGCACGCCTGTGCCATAGCCAATAGCCACATGGACAACCCATGGGCTGTGGTGGATGTTAAGGACTTCGAAGAAAGGAGTCTATACCAT	0.44282	0	0
OK006_E_047	Conotoxin precursor	F	F-2	OK006A_TRINITY_DN2788_c0_g1_i7_Frame_R1	MQRGAVLLGVVAFLGLLPQAAAKVYNLHETEVWAVVAYSKRVMHACALANGHMDNPWSVVDVKDFEERSLFHSMYKAMVHCLQDFFQQRP*	ATGCAGAGAGGGGCCGTGCTGCTCGGGGTGGTCGCCTTCCTTGGCCTGTTGCCCCAGGCCGCTGCCAAGGTGTACAATTTGCACGAAACTGAAGTGTGGGCCGTGGTCGCCTATTCAAAGAGAGTGATGCACGCCTGTGCCCTAGCCAATGGCCACATGGACAACCCATGGTCTGTGGTGGATGTTAAGGACTTTGAAGAAAGGAGTCTATTCCATTCAATGTACAAGGCAATGGTACACTGCCTGCAAGATTTTTTCCAGCAAAGACCATGA	1.9435	1	1
OK006_E_048	Conotoxin precursor	F	F-2	OK006A_TRINITY_DN2788_c0_g1_i6_Frame_R1	MQRGAVLLGVVAFLGLLPQAAAKVYNLHETEVWAVVAYSKRVMHACAIANSHMDDPWLVVDVKDFEERSLFHSMYKAMVSCLEDFFQQRP*	ATGCAGAGAGGGGCCGTGCTGCTCGGGGTGGTCGCCTTCCTTGGCCTGTTGCCCCAGGCCGCTGCCAAGGTGTACAATTTGCACGAAACTGAAGTGTGGGCCGTGGTCGCCTATTCAAAGAGAGTGATGCACGCCTGTGCCATAGCCAATAGCCACATGGACGACCCATGGCTTGTGGTGGATGTTAAGGACTTTGAAGAAAGGAGTCTATTCCATTCAATGTACAAGGCAATGGTATCCTGCCTGGAAGATTTTTTCCAGCAAAGACCATGA	3.93556	1	1
OK006_E_049	Conotoxin precursor	F	F-2	OK006A_TRINITY_DN2788_c0_g1_i4_Frame_R1	MQRGAVLLGVVAFLGLLPQAAAKVYNLHETEVWAVVAYSKRVMHACAIANSHIDDPWSVVDVKDFEERSLFHSMYEAMVFCLEDFFQRRP*	ATGCAGAGAGGGGCCGTGCTGCTCGGGGTGGTCGCCTTCCTTGGCCTGTTGCCCCAGGCCGCTGCCAAGGTGTACAATTTGCACGAAACTGAAGTGTGGGCCGTGGTCGCCTATTCAAAGAGAGTGATGCACGCCTGTGCCATAGCCAATAGCCACATAGACGACCCATGGTCTGTGGTGGATGTTAAGGACTTTGAAGAAAGGAGTCTATTCCATTCAATGTACGAGGCAATGGTATTCTGCCTGGAAGATTTTTTCCAGCGAAGACCATGA	1.93021	1	1
OK006_E_050	Conotoxin precursor	F	F-2	OK006A_TRINITY_DN2788_c0_g1_i3_Frame_R3	RVMHACALANGHMDNPWSVVDVKDFEERSLYHSLYKAMVSCLEDFFQQRP*	AGAGTGATGCACGCCTGTGCCCTAGCCAATGGCCACATGGACAACCCATGGTCTGTGGTGGATGTTAAGGACTTTGAAGAAAGGAGTCTATACCATTCATTGTACAAAGCAATGGTATCCTGCCTGGAAGATTTTTTCCAGCAAAGACCATGA	7.8908	1	0
OK006_E_051	Conotoxin precursor	F	F-2	OK006A_TRINITY_DN2788_c0_g1_i5_Frame_R1	MQRGAVLLGVVAFLGLLPQAAAKVYNLHETEVWAVVAYTQRVMHACATANDYMDNPWSLMHVADFEERGLYHGMYTAMVTCLEDFFQQRP*	ATGCAGAGAGGGGCCGTGCTGCTCGGGGTGGTCGCCTTCCTTGGCCTGTTGCCCCAGGCCGCTGCCAAGGTGTACAATTTGCACGAAACTGAAGTGTGGGCCGTGGTCGCCTATACACAGAGAGTGATGCACGCCTGTGCCACAGCCAATGACTACATGGACAACCCATGGTCTCTGATGCACGTTGCGGACTTTGAAGAAAGGGGTCTATACCATGGAATGTACACCGCAATGGTAACCTGCCTGGAAGATTTTTTCCAGCAAAGACCATGA	2.99618	1	1
OK006_E_052	Conotoxin precursor	F	F-2	OK006A_TRINITY_DN11296_c0_g1_i1_Frame_R1	VAYSQSLMNACATANSYMDNPWSLMNIADFKERSTYYSMYTEMVTCLNYFLQRRL*	GTCGCCTATTCACAGAGTCTGATGAACGCCTGTGCCACAGCCAACAGCTACATGGACAACCCATGGTCTCTGATGAACATTGCGGACTTTAAAGAAAGGAGTACATACTATTCAATGTACACCGAAATGGTAACCTGCCTGAACTATTTTCTCCAGAGAAGACTATGA	5.63932	1	0
OK006_E_053	Conotoxin precursor	H	H-1a	OK006A_TRINITY_DN9372_c0_g2_i4_Frame_F2	MNSAGRLLLLCLALGVLFESLGIPVADDVKADRDTDPGDKDARGFYHGRTQVDCGGASCDFDCCETIDGEEKCSELNCGSISDTEPAR*	ATGAACTCCGCTGGCCGTCTCCTGCTTCTGTGCCTAGCTCTGGGCGTACTGTTCGAGTCTCTGGGAATACCCGTGGCTGATGACGTAAAAGCTGACAGAGACACCGATCCTGGCGACAAAGATGCAAGGGGTTTTTACCACGGGAGGACCCAGGTGGACTGCGGCGGTGCATCATGTGATTTCGACTGCTGTGAAACAATCGACGGGGAAGAGAAATGCAGTGAGCTTAACTGTGGTTCGATCTCAGACACAGAGCCTGCGAGATAA	0.712298	1	1
OK006_E_054	Conotoxin precursor	H	H-1a	OK006A_TRINITY_DN9372_c0_g2_i3_Frame_F2	MNSAGRLLLLCLALGVLFESLGIPVADDVKADRDTDPGDKDARGFYYWRAQVDCGGTLCEFGCCKPINGEDECRELDCD*	ATGAACTCCGCTGGCCGTCTCCTGCTTCTGTGCCTAGCTCTGGGCGTACTGTTCGAGTCTCTGGGAATACCCGTGGCTGATGACGTAAAAGCTGACAGAGACACCGATCCTGGCGACAAAGATGCAAGGGGTTTTTACTACTGGAGGGCCCAGGTGGATTGCGGCGGTACGCTATGTGAGTTCGGCTGCTGTAAACCAATCAACGGGGAAGACGAATGCAGAGAGCTTGATTGTGATTAG	13.8947	1	1
OK006_E_055	Conotoxin precursor	H	H-2b	OK006A_TRINITY_DN10933_c0_g1_i1_Frame_F1	MRTSSQLLFLCVSMGLVFALLGHPIADVRDAAGGADSEERSMQGSQTVEGKEASSSERGVLNCDSPSGEC*	ATGAGAACCAGCAGCCAACTCCTGTTTCTCTGCGTCTCTATGGGACTGGTGTTTGCGCTTCTGGGACATCCCATTGCTGATGTCAGAGACGCTGCCGGAGGCGCAGATTCGGAAGAGAGATCCATGCAGGGATCTCAAACCGTTGAAGGAAAAGAGGCGTCATCGTCTGAGAGGGGGGTCCTGAACTGCGATAGCCCATCGGGCGAATGCTAG	10.0082	1	1
OK006_E_056	Conotoxin precursor	I1	I1-1	OK006A_TRINITY_DN7092_c0_g2_i2_Frame_R1	MKLALTFLLILMILPLMTGMKKSGDHERRSVKSMRDVFRDHRDCSSDCVPHCPNRNECCDGDVCTYNSSLEKWFCIGCGSGGGE*	ATGAAGTTGGCTCTGACATTTCTTCTGATTCTGATGATTCTGCCCTTGATGACTGGGATGAAGAAGTCTGGTGACCATGAGCGGAGGAGTGTTAAATCAATGAGAGATGTCTTTCGTGATCATCGAGATTGTTCTTCTGACTGTGTTCCCCACTGCCCTAACAGAAACGAGTGCTGCGATGGTGACGTCTGTACATACAACAGCTCATTGGAAAAATGGTTTTGCATTGGCTGTGGATCAGGCGGGGGCGAATAA	3.41528	1	1
OK006_E_057	Conotoxin precursor	I1	I1-1	OK006A_TRINITY_DN7092_c0_g2_i1_Frame_R1	MKLALTFLLILMILPLMTGMKKSGDHERRSVKSMRDVFRDHRQFECVEGGENCRADSNCCSRVCCQLSTGKRCAFKQTVGCDDIHLN*	ATGAAGTTGGCTCTGACATTTCTTCTGATTCTGATGATTCTGCCCTTGATGACTGGGATGAAGAAGTCTGGTGACCATGAGCGGAGGAGTGTTAAATCAATGAGAGATGTCTTTCGTGATCATCGGCAATTCGAGTGCGTCGAGGGCGGAGAAAACTGTCGAGCGGACAGCAACTGCTGTAGCCGTGTATGCTGTCAGTTATCGACAGGGAAACGATGCGCATTTAAACAAACAGTGGGTTGCGATGACATCCATCTCAATTAG	12.6144	1	1
OK006_E_058	Conotoxin precursor	I1	I1-2	OK006A_TRINITY_DN7092_c0_g1_i2_Frame_R2	GAKGDRGTCSYLGGICEHHFNCCGDLCCYGHKCVMTVLPCDIFRF*	GGTGCTAAAGGCGATCGGGGAACGTGCTCATACCTAGGAGGGATTTGCGAACATCATTTCAACTGCTGTGGGGATTTGTGTTGTTACGGCCACAAGTGTGTTATGACTGTCTTGCCATGTGACATCTTTCGCTTCTAG	3.23617	1	0
OK006_E_059	Conotoxin precursor	I1	I1-2	OK006A_TRINITY_DN7092_c0_g1_i3_Frame_R1	MKLCVTFLLLLVILPTVTGEKSSERTLSGAKGDRRRCVTVGERCEQFSNCCGGMCCVGDRCVMTGFPCVF*	ATGAAGCTGTGTGTGACGTTTCTTCTTCTTCTGGTGATTCTGCCAACGGTGACTGGGGAGAAGTCCAGCGAGCGTACACTGAGTGGTGCTAAAGGTGATCGGAGAAGATGCGTAACCGTTGGAGAAAGATGCGAACAGTTTTCCAACTGCTGTGGGGGGATGTGTTGTGTCGGCGACAGGTGTGTTATGACTGGCTTTCCATGTGTCTTCTAG	92.8424	1	1
OK006_E_060	Conotoxin precursor	I2	I2-1	OK006A_TRINITY_DN2887_c0_g1_i14_Frame_R3	MFRVTSVRCFLLVIVLLNLAALTDACHLEGALCENDADCCLLECCLWRCASNCEKRGRRQALMALFGQR*	ATGTTTCGTGTGACGTCAGTCAGATGTTTCCTGCTGGTCATTGTTCTTCTGAACTTGGCTGCGCTTACTGATGCCTGTCACCTTGAAGGAGCATTATGCGAAAATGATGCCGATTGCTGTCTCCTGGAATGCTGCCTTTGGCGTTGCGCATCAAATTGTGAAAAGAGGGGGCGACGCCAAGCTCTGATGGCATTATTTGGCCAACGTTGA	32.5924	1	1
OK006_E_061	Conotoxin precursor	I2	I2-1	OK006A_TRINITY_DN2887_c0_g1_i9_Frame_R1	MFRVTSVRCFLLVIVLLNLAALTDACHPEGTPCTNDEQCCLMECCFWSCSSNCEKRGRRQALMALFGQR*	ATGTTTCGTGTGACGTCAGTCAGATGTTTCCTGCTGGTCATTGTTCTTCTGAACTTGGCTGCGCTTACTGATGCCTGTCACCCTGAAGGAACACCATGCACAAATGATGAACAATGCTGTCTCATGGAATGCTGCTTTTGGTCTTGCTCATCAAATTGTGAAAAGAGGGGGCGACGCCAAGCTCTGATGGCATTATTTGGCCAACGTTGA	31.5818	1	1
OK006_E_062	Conotoxin precursor	I2	I2-1	OK006A_TRINITY_DN2887_c0_g1_i2_Frame_R3	MMFRLTSVRCFLLVIVLLNLAALTDACHPEGTPCTNDEQCCLMECCFWSCSSNCEKRGRRQALMALFGQR*	ATGATGTTTCGATTGACGTCAGTCAGATGTTTCCTGCTGGTCATTGTTCTTCTGAACTTGGCTGCGCTTACTGATGCCTGTCACCCTGAAGGAACACCATGCACAAATGATGAACAATGCTGTCTCATGGAATGCTGCTTTTGGTCTTGCTCATCAAATTGTGAAAAGAGGGGGCGACGCCAAGCTCTGATGGCATTATTTGGCCAACGTTGA	0	1	1
OK006_E_063	Conotoxin precursor	I2	I2-1	OK006A_TRINITY_DN2887_c0_g1_i19_Frame_R1	MMFRLTSVRCFLLVIVLLNLVVLTDACGAAGLPCPLNDPCCADMDCCGDVCSLNCEKRGRRQALMALFGQR*	ATGATGTTTCGATTGACGTCAGTCAGATGTTTCCTGCTGGTCATTGTTCTTCTGAACTTGGTTGTGCTTACCGATGCCTGTGGCGCTGCAGGATTGCCATGCCCACTTAATGACCCTTGTTGTGCTGACATGGACTGCTGCGGAGATGTTTGCTCATTGAATTGTGAAAAGAGGGGGCGACGCCAAGCTCTGATGGCATTATTTGGCCAACGTTGA	14.9836	1	1
OK006_E_064	Conotoxin precursor	I2	I2-1	OK006A_TRINITY_DN2887_c0_g1_i11_Frame_R3	MFRVTSVRCFLLVIVLLNLAVLTDAYRRKECSTNGDCDSTFAVCCNGVCVSNCEERRRRQVPLKLFGQR*	ATGTTTCGTGTGACGTCAGTCAGATGTTTCCTGCTGGTCATTGTTCTTCTGAACTTGGCTGTGCTTACCGATGCCTATCGCCGTAAAGAATGCTCAACAAATGGCGATTGCGATAGCACTTTTGCGGTGTGCTGCAACGGGGTTTGCGTATCAAATTGTGAAGAGAGGAGGCGACGCCAAGTTCCGTTGAAATTATTTGGCCAACGTTGA	20591.8	1	1
OK006_E_065	Conotoxin precursor	I2	I2-1	OK006A_TRINITY_DN2887_c0_g1_i10_Frame_R3	MMFRLTSVRCFLLVIVLLNLAVLTDAYRRKECSTNGDCDSTFAVCCNGVCVSNCEERRRRQVPLKLFGQR*	ATGATGTTTCGATTGACGTCAGTCAGATGTTTCCTGCTGGTCATTGTTCTTCTGAACTTGGCTGTGCTTACCGATGCCTATCGCCGTAAAGAATGCTCAACAAATGGCGATTGCGATAGCACTTTTGCGGTGTGCTGCAACGGGGTTTGCGTATCAAATTGTGAAGAGAGGAGGCGACGCCAAGTTCCGTTGAAATTATTTGGCCAACGTTGA	84.7034	1	1
OK006_E_066	Conotoxin precursor	I2	I2-2	OK006A_TRINITY_DN203_c2_g1_i1_Frame_F2	MMCRLTSLCCLLVIVFLNSAAGGIPCVGSGGFCSPHVWCCDSLDVCCELPGPSMCTREAACESVGSALGRRAQYTRFFRR*	ATGATGTGTCGTTTAACGTCACTCTGCTGTTTGCTGGTCATCGTTTTCCTGAACTCGGCTGCAGGTGGCATTCCCTGTGTCGGGTCAGGAGGATTCTGTTCTCCGCATGTATGGTGCTGCGATTCGCTTGATGTCTGTTGTGAACTCCCTGGACCTTCGATGTGCACACGAGAAGCTGCGTGTGAATCTGTGGGAAGTGCTCTAGGACGCCGGGCACAATACACCCGTTTCTTCAGACGTTGA	41.572	1	1
OK006_E_067	Conotoxin precursor	I3		OK006A_TRINITY_DN1694_c0_g1_i3_Frame_R1	MKLFLAIVVILMLLSLSTGGETSDNHAIRNATALRDRLLGPKESKCQNAQGNCRDDSDCCGWLCCTGQSSGCAVTTMNCKEQPVQ*	ATGAAGCTGTTTTTGGCGATCGTTGTTATTCTGATGCTTCTATCCTTAAGCACCGGAGGGGAGACGTCTGACAACCATGCAATCCGGAATGCCACTGCACTGAGAGACAGGCTTCTTGGTCCAAAGGAATCGAAATGCCAAAATGCGCAAGGGAACTGTAGGGATGATAGCGATTGCTGTGGATGGCTGTGTTGTACCGGGCAGTCCAGTGGATGCGCTGTCACAACCATGAACTGCAAGGAACAACCTGTCCAATGA	3317.99	1	1
OK006_E_068	Conotoxin precursor	I3		OK006A_TRINITY_DN1694_c0_g1_i1_Frame_R1	MKLFLAIVVILMLLSLSTGVETSDNHASQSATALRDRLLGPKATTCQGTSGVCSHHNDCCWWLCCNRQIGGCVVSTERCKSRATGRSSGMLVHPHLQQPADRSN*	ATGAAGCTGTTTTTGGCGATCGTTGTTATTCTGATGCTTCTATCCTTAAGCACCGGAGTGGAGACGTCTGACAACCATGCAAGCCAGAGTGCCACTGCACTGAGAGACAGGCTTCTTGGTCCAAAGGCAACGACATGCCAAGGGACTTCTGGGGTATGTAGCCATCATAACGATTGCTGTTGGTGGCTGTGTTGTAACCGGCAGATCGGTGGATGCGTTGTATCAACCGAGCGTTGCAAGTCAAGAGCTACCGGGCGCAGCTCTGGCATGCTTGTACATCCACATTTGCAGCAGCCTGCTGACAGATCGAATTAA	68.378	1	1
OK006_E_069	Conotoxin precursor	I3		OK006A_TRINITY_DN1694_c0_g1_i5_Frame_R1	MKLFWAIVVILMLLPLRTGVETSDDHASRSATALRDLLLRHEQCCGYLDKCENTTQCCEGYSCVTAHYCDRN*	ATGAAGCTGTTTTGGGCGATCGTTGTTATTCTGATGCTTCTACCCTTACGCACCGGAGTGGAGACGTCTGACGACCATGCAAGCCGGAGTGCCACTGCACTGAGAGACTTGCTTCTTCGTCATGAACAGTGCTGCGGATATCTTGATAAATGCGAGAATACCACCCAGTGCTGTGAAGGTTACTCTTGTGTCACCGCCCATTACTGCGATAGGAATTAA	16979.4	1	1
OK006_E_070	Conotoxin precursor	I4		OK006A_TRINITY_DN14563_c0_g1_i15_Frame_R2	MFGHTSVRFLLLSTMLLGMAAMVLCSCDSDFGETCEEEKVCTCSHHGCCESTSSAKKDQCMTLAVCSAWVSKRRAIQKQKRFLGMVRGLAS*	ATGTTCGGTCATACGTCAGTCAGATTTCTTCTGCTCTCCACCATGCTTCTTGGCATGGCGGCGATGGTTTTGTGCTCGTGTGACTCCGACTTCGGTGAAACGTGTGAAGAGGAAAAGGTCTGCACATGTTCTCATCACGGGTGCTGTGAGTCAACTTCTTCGGCCAAAAAAGATCAGTGCATGACACTTGCGGTCTGCAGTGCGTGGGTTTCTAAACGCAGGGCAATCCAGAAGCAAAAAAGATTCCTTGGTATGGTGCGCGGTCTTGCCAGCTAG	2.54926	1	1
OK006_E_071	Conotoxin precursor	J	J-1	OK006A_TRINITY_DN5468_c0_g1_i1_Frame_F3	MVSVQSVACCCLLWLMLSVQLVNPGSPGTAQLSGNPIAGLSIESALEAICPEMCNEGIGEKPFCHCTKKRDVVSSRIRRRKRSMV*	ATGGTGTCTGTTCAGTCTGTGGCCTGCTGCTGTCTGCTGTGGCTGATGCTCTCTGTACAGCTCGTCAATCCTGGCTCCCCTGGAACTGCACAGCTGTCTGGGAATCCCATTGCTGGACTTTCTATAGAGTCTGCTCTGGAGGCAATATGCCCTGAGATGTGCAACGAGGGCATCGGGGAAAAACCATTTTGCCACTGCACAAAGAAACGGGACGTGGTCTCTTCACGGATCAGAAGGAGAAAAAGATCCATGGTGTGA	9.31721	1	1
OK006_E_072	Conotoxin precursor	J	J-1	OK006A_TRINITY_DN913_c0_g1_i1_Frame_F3	MASVQSVTGFCCLLWLMISVQLVTSGLTGTARLSKHLTARIPSEANMEILCPEWCNEGYDGYGCTCTKRQDVVSSPIRRRKRSMRV*	ATGGCGTCTGTTCAGTCTGTGACCGGCTTCTGCTGCCTGCTGTGGCTGATGATCTCTGTGCAGCTGGTCACTTCCGGCTTAACTGGAACTGCACGCCTGTCTAAGCATCTCACTGCTAGAATTCCTTCAGAGGCTAATATGGAAATCCTGTGCCCTGAATGGTGCAACGAGGGATACGACGGGTACGGCTGCACCTGCACCAAAAGACAGGACGTGGTTTCTTCACCGATAAGAAGGCGAAAAAGATCGATGAGGGTGTGA	12.9084	1	1
OK006_E_073	Conotoxin precursor	J	J-1	OK006A_TRINITY_DN19_c0_g1_i1_Frame_R2	MASVQSVTCCCLLWLMLSGSPGTAQPPGHPSPDLCKLLCENGLKIHFCDCKYERDVDSLWIRRRKGSTVRLHTHTSDDEDTIGWD*	ATGGCGTCTGTTCAGTCTGTGACCTGCTGCTGTCTGCTGTGGCTGATGCTCTCTGGCTCCCCTGGAACTGCACAGCCGCCTGGGCATCCGAGTCCGGATTTGTGCAAGTTGCTGTGCGAAAACGGTTTGAAGATACACTTTTGCGACTGCAAATATGAACGGGACGTGGACTCTTTATGGATCAGAAGGAGAAAAGGATCCACGGTGCGACTGCACACTCACACTTCCGATGACGAAGACACCATTGGCTGGGACTGA	26.8391	1	1
OK006_E_074	Conotoxin precursor	K		OK006A_TRINITY_DN37164_c0_g1_i1_Frame_F2	MNMRMTLTLFVLVVMTAASASGHALTEAKRDDDELNAVTLYYWCTTYGFSPDYCCKYVRRRGLKLPAALCS*	ATGAACATGCGGATGACGCTCACATTGTTCGTACTGGTTGTCATGACAGCTGCCTCCGCTTCAGGGCATGCATTGACAGAAGCCAAGAGGGACGACGATGAACTGAATGCAGTGACACTTTATTATTGGTGTACAACCTACGGATTCTCACCAGACTACTGTTGCAAATACGTCAGGAGGCGGGGTCTAAAGCTGCCGGCTGCACTATGTTCGTAA	1.85571	1	1
OK006_E_075	Conotoxin precursor	L		OK006A_TRINITY_DN2699_c0_g1_i1_Frame_R1	MKLLVTFIAVLMLATSLTYGFSLFSNNGERRAFEPRDPDAADQLVREERATRTCNPPCTGLAMCQSGTCGYVRFR*	ATGAAGCTGTTGGTGACGTTCATTGCTGTTCTGATGCTGGCTACGTCCTTGACCTATGGATTTAGCCTCTTCTCTAACAATGGGGAGAGGAGGGCCTTTGAGCCACGTGACCCCGATGCGGCGGATCAACTGGTTCGCGAGGAACGAGCAACCCGCACTTGCAATCCGCCCTGCACTGGTTTAGCAATGTGCCAGAGTGGAACATGTGGCTACGTACGCTTCAGGTAG	131.06	1	1
OK006_E_076	Conotoxin precursor	M	M-1	OK006A_TRINITY_DN3579_c0_g1_i3_Frame_F1	MMSKLGVLLTICLLLFPITGLPLDEDQPADLPALRMEDSATEHSPWFDPVKRCCSKTCWKCTPCCK*	ATGATGTCTAAACTGGGAGTCTTGTTGACCATCTGTCTGCTTCTGTTTCCAATTACTGGTCTTCCGCTGGATGAAGATCAACCTGCTGACCTACCTGCATTGCGTATGGAGGACTCTGCAACTGAGCATAGTCCCTGGTTTGATCCCGTCAAACGATGCTGCTCGAAAACTTGCTGGAAGTGCACCCCTTGTTGCAAGTAG	5.41882	1	1
OK006_E_077	Conotoxin precursor	M	M-1	OK006A_TRINITY_DN3579_c0_g1_i1_Frame_F1	MMSKLGVLLTICLLLFPHTALPLDGDQPADQPAERMQDIATEQHPMFDPVKRCCRKQSCTTCMPCCWG*	ATGATGTCTAAACTGGGAGTCTTGTTGACCATCTGTCTGCTTCTGTTTCCCCATACTGCTCTTCCGCTGGATGGAGATCAACCTGCAGACCAACCTGCAGAGCGTATGCAGGACATTGCAACTGAACAGCATCCCATGTTTGATCCTGTCAAACGGTGCTGCAGGAAGCAGAGCTGTACAACATGCATGCCGTGCTGCTGGGGTTGA	3.72584	1	1
OK006_E_078	Conotoxin precursor	M	M-2	OK006A_TRINITY_DN3579_c0_g1_i2_Frame_F1	MMSKLGVLLTICLLLFPHTALPLDGDQPADRPAERMQDDISSEQHPLFNQKRRCCGEGSSCPRYFR	ATGATGTCTAAACTGGGAGTCTTGTTGACCATCTGTCTGCTTCTGTTTCCCCATACTGCTCTTCCGCTGGATGGAGATCAACCTGCAGACCGACCTGCAGAGCGTATGCAGGACGACATTTCATCTGAGCAGCATCCCTTGTTTAATCAGAAAAGAAGGTGCTGCGGCGAAGGCTCGTCATGCCCCAGATATTTCAGA	2.67351	0	0
OK006_E_079	Conotoxin precursor	M	M-3a	OK006A_TRINITY_DN4946_c0_g3_i1_Frame_R2	VVLFIFLVLFPLATLQLDADQPVKRYAKNKQDLNADKRMRLILPALRQRQCCAWEWCDHVCGCCE*	GTGGTACTATTCATCTTCCTGGTCCTGTTTCCCCTGGCAACGCTCCAGCTGGATGCAGATCAACCTGTAAAACGATATGCGAAGAACAAACAGGACCTCAACGCAGATAAAAGGATGAGATTGATATTGCCTGCTCTGAGGCAGCGGCAATGCTGTGCTTGGGAATGGTGCGACCATGTTTGTGGTTGCTGCGAGTAG	13.6926	1	0
OK006_E_080	Conotoxin precursor	M	M-3a	OK006A_TRINITY_DN339_c0_g1_i23_Frame_R3	MMLKMRAVLFTFLVLFPLATLQLNADQHVKRYAENKQDLNPDGKREFILPAVGRTCCDLTWCNGNCRCCTPR*	ATGATGCTGAAAATGAGAGCAGTGCTATTCACCTTTCTGGTCCTGTTTCCCCTGGCAACGCTCCAACTGAATGCAGATCAACATGTAAAACGATATGCGGAGAACAAACAGGACCTCAACCCAGATGGAAAAAGGGAATTCATATTGCCTGCTGTGGGGAGAACATGCTGTGATCTTACATGGTGCAACGGAAATTGTCGTTGCTGCACCCCAAGATAG	102.368	1	1
OK006_E_081	Conotoxin precursor	M	M-3a	OK006A_TRINITY_DN117_c0_g1_i23_Frame_R3	MMLKMGVVLFVFLVLFPLATLQLNADQHVKRYAENKQDLNPDERKG	ATGATGCTGAAAATGGGAGTGGTGCTATTCGTCTTTCTGGTCCTGTTTCCCCTGGCAACGCTCCAACTGAATGCAGATCAACATGTAAAACGATATGCGGAGAACAAACAGGACCTCAACCCAGATGAAAGGAAGGGA	170.623	0	0
OK006_E_082	Conotoxin precursor	M	M-3a	OK006A_TRINITY_DN339_c0_g1_i5_Frame_R3	MMLKMRAVLFTFLVLFPLATLQLNADQHVKRYAENKQDLNPDERKGLVSLDLRLPCCDVGWCSRRCNCDVYRP*	ATGATGCTGAAAATGAGAGCAGTGCTATTCACCTTTCTGGTCCTGTTTCCCCTGGCAACGCTCCAACTGAATGCAGATCAACATGTAAAACGATATGCGGAGAACAAACAGGACCTCAACCCAGATGAAAGGAAGGGATTGGTATCGCTTGATCTGAGGCTACCATGCTGTGATGTTGGATGGTGCAGCAGGCGTTGTAATTGCGACGTCTATAGACCCTGA	25.3234	1	1
OK006_E_083	Conotoxin precursor	M	M-3a	OK006A_TRINITY_DN339_c0_g1_i11_Frame_R3	MMLKMRAVLFTFLVLFPLATLQLNADQHVKRYAENKQDLNPDERKGFVSLALRRPCCSLRWCSNYCRCGI*	ATGATGCTGAAAATGAGAGCAGTGCTATTCACCTTTCTGGTCCTGTTTCCCCTGGCAACGCTCCAACTGAATGCAGATCAACATGTAAAACGATATGCGGAGAACAAACAGGACCTCAACCCAGATGAAAGGAAGGGATTCGTATCGCTTGCTCTGAGGCGACCATGCTGTAGTCTTCGATGGTGCAGCAACTATTGTCGTTGCGGCATCTAA	7.68182	1	1
OK006_E_084	Conotoxin precursor	M	M-3a	OK006A_TRINITY_DN117_c0_g1_i13_Frame_R3	MMLKMGVVLFVFLVLFPLATLQLDADQPVERDAENKQDNPDERKGFV	ATGATGCTGAAAATGGGAGTGGTGCTATTCGTCTTTCTGGTCCTGTTTCCCCTGGCAACGCTCCAACTGGATGCAGATCAACCTGTAGAACGAGATGCGGAGAACAAACAGGACAACCCAGATGAAAGGAAGGGATTCGTA	239.481	0	0
OK006_E_085	Conotoxin precursor	M	M-3a	OK006A_TRINITY_DN339_c0_g1_i22_Frame_R3	MMLKLRVVLFTLLVLVPMATLKLNADQHVKRYAENKQDLNPDERRGFKLSALRGCCPSSVCDLRSGCTCCA*	ATGATGTTGAAACTGAGAGTGGTACTATTCACCTTGCTGGTCCTGGTTCCCATGGCAACGCTCAAACTGAATGCAGATCAACATGTAAAACGATATGCGGAGAACAAACAGGACCTCAACCCAGATGAAAGGAGGGGATTCAAATTGTCTGCTCTGAGGGGATGCTGCCCTTCATCTGTATGCGATCTCAGGTCAGGGTGTACATGCTGCGCTTAG	159.272	1	1
OK006_E_086	Conotoxin precursor	M	M-3a	OK006A_TRINITY_DN13142_c1_g1_i1_Frame_R1	IFLVLFPLATLQLDADQPVERYAKNKQLLNPHKRRGIILRAPGKRCCDWENCDHLCSCCGG*	ATCTTTCTGGTCCTGTTTCCACTGGCAACACTGCAGCTGGATGCAGATCAACCTGTAGAACGATATGCGAAGAACAAACAGCTCCTCAACCCACATAAAAGGAGGGGAATCATATTGCGTGCTCCGGGGAAGCGATGCTGTGATTGGGAGAATTGCGACCATCTTTGTTCATGCTGCGGCGGTTAG	5.85622	1	0
OK006_E_087	Conotoxin precursor	M	M-3a	OK006A_TRINITY_DN4946_c0_g2_i2_Frame_R2	MLKLSVVLFILLVLFPLPTLQLDADQPVERYAENKQDLNPDERRNFMMHIVRRCCTPCKIPPCQCCM*	ATGTTGAAACTGAGCGTGGTACTCTTCATCTTGCTGGTCCTGTTTCCCCTGCCAACGCTCCAACTGGATGCAGATCAACCTGTAGAACGATACGCGGAGAACAAACAGGACCTCAACCCAGATGAAAGGAGAAACTTCATGATGCATATTGTGAGGAGGTGCTGCACACCATGCAAGATTCCGCCATGTCAGTGCTGCATGTAG	5.67496	1	1
OK006_E_088	Conotoxin precursor	M	M-3a	OK006A_TRINITY_DN339_c0_g1_i8_Frame_R3	MMLKMRAVLFTFLVLFPLATLQLNADQHVKRYAENKQDLLHPDERTGFMLSAVGRRCCRLRLCKTHCHCCVYRP*	ATGATGCTGAAAATGAGAGCAGTGCTATTCACCTTTCTGGTCCTGTTTCCCCTGGCAACGCTCCAACTGAATGCAGATCAACATGTAAAACGATATGCGGAGAACAAACAGGACCTCCTCCACCCAGATGAAAGGACGGGATTCATGTTGTCTGCTGTGGGGCGACGATGCTGTCGTCTTCGACTGTGCAAAACGCATTGTCATTGCTGCGTCTATAGACCCTGA	15.054	1	1
OK006_E_089	Conotoxin precursor	M	M-3a	OK006A_TRINITY_DN339_c0_g1_i21_Frame_R3	MMLKMRAVLFTFLVLFPLATLQLNADQHVKRYAENKQDLLHPNERTGFILPAQRRRCCSLRRCKPHCHCCVYRP*	ATGATGCTGAAAATGAGAGCAGTGCTATTCACCTTTCTGGTCCTGTTTCCCCTGGCAACGCTCCAACTGAATGCAGATCAACATGTAAAACGATATGCGGAGAACAAACAGGACCTCCTCCACCCAAATGAAAGGACGGGATTCATATTGCCTGCTCAGAGGCGACGATGCTGTAGTCTTCGACGGTGCAAACCGCATTGTCATTGCTGCGTCTATAGACCCTGA	2.54159	1	1
OK006_E_090	Conotoxin precursor	M	M-3a	OK006A_TRINITY_DN4946_c0_g2_i1_Frame_R2	MMLKLRVVLFIFLVLFPLATLQLDAGQPVARYAKNKQDLNPNKRRRFILRAMRQKCCEWKVCEVQCGCCY*	ATGATGTTGAAACTGAGAGTGGTACTATTCATCTTCCTGGTCCTGTTTCCCCTGGCAACGCTCCAACTGGATGCAGGTCAGCCTGTGGCACGATATGCGAAGAACAAACAGGACCTCAACCCAAATAAAAGGAGGAGATTCATATTGCGTGCTATGAGGCAGAAATGCTGTGAGTGGAAAGTGTGCGAAGTTCAGTGTGGTTGCTGCTATTAG	1394.27	1	1
OK006_E_091	Conotoxin precursor	M	M-3a	OK006A_TRINITY_DN5871_c0_g1_i1_Frame_R2	DQPVERYVENKQDLNPDERTGFILSAQKQKRCCTFPVCTACYCCRMHPQHP*	GATCAACCTGTAGAACGATATGTGGAGAACAAACAGGACCTCAACCCAGATGAAAGGACGGGATTCATATTGTCTGCTCAAAAGCAGAAGCGATGCTGTACATTCCCAGTTTGCACTGCATGTTATTGCTGCAGGATGCACCCCCAACATCCATGA	13.9134	1	0
OK006_E_092	Conotoxin precursor	M	M-3a	OK006A_TRINITY_DN1129_c0_g1_i2_Frame_F1	MMLKMGVVLFVFLVLFPLSTLQLDADQPVERDAENKQDLNADERMTLLLEDGCCTRPRCTGACSCCQD*	ATGATGCTGAAAATGGGAGTGGTGCTATTTGTCTTTCTGGTCCTGTTTCCCCTGTCAACGCTCCAACTGGATGCAGATCAACCTGTAGAACGAGATGCGGAGAACAAACAGGACCTCAACGCAGATGAAAGGATGACATTACTATTGGAAGATGGATGCTGTACACGCCCACGTTGCACTGGAGCTTGTTCTTGCTGCCAGGACTAG	97.2641	1	1
OK006_E_093	Conotoxin precursor	M	M-3a	OK006A_TRINITY_DN1129_c0_g1_i1_Frame_F1	MMLKMGVVLFVFLVLFPLSTLQLDADQPVERDAENKQDLNADERMTLLLYALGEDGCCTRPRCTGACSCCQD*	ATGATGCTGAAAATGGGAGTGGTGCTATTTGTCTTTCTGGTCCTGTTTCCCCTGTCAACGCTCCAACTGGATGCAGATCAACCTGTAGAACGAGATGCGGAGAACAAACAGGACCTCAACGCAGATGAAAGGATGACATTACTATTGTATGCTCTGGGGGAAGATGGATGCTGTACACGCCCACGTTGCACTGGAGCTTGTTCTTGCTGCCAGGACTAG	14.7807	1	1
OK006_E_094	Conotoxin precursor	M	M-3a	OK006A_TRINITY_DN2806_c1_g1_i1_Frame_F2	MLKMGVLLFIFLVLFPLTTLELDTDRPVERHAAIKQDLKPQERRGIRLHAPRDECCEPQWCDGACDCCS*	ATGTTGAAAATGGGAGTGCTGCTGTTCATCTTTCTGGTCTTGTTTCCCCTGACAACGCTCGAACTGGATACAGATCGACCTGTAGAACGACATGCGGCAATCAAACAGGACCTCAAACCACAGGAAAGGAGGGGAATAAGATTGCACGCTCCAAGGGACGAATGCTGTGAACCGCAATGGTGCGACGGAGCTTGTGACTGCTGCTCGTAG	11.2357	1	1
OK006_E_095	Conotoxin precursor	M	M-3a	OK006A_TRINITY_DN1129_c0_g2_i1_Frame_F2	MLKMGVVMLFTFLVLLPLVTFQLDADQPREQYSGNKRALNPGERKKTKLHTLRQRCCIGPECPEECYCCV*	ATGCTGAAAATGGGAGTGGTGATGCTATTCACCTTTCTGGTCCTGTTACCCTTGGTAACGTTCCAGCTGGATGCAGATCAACCTAGAGAACAGTATTCGGGGAACAAACGGGCCCTCAACCCAGGAGAAAGGAAGAAAACAAAATTGCACACTCTAAGGCAGCGATGCTGTATTGGGCCAGAATGCCCTGAAGAATGTTATTGCTGTGTGTAG	3.62	1	1
OK006_E_096	Conotoxin precursor	M	M-3a	OK006A_TRINITY_DN117_c0_g1_i30_Frame_R1	MMLKMGVVLFVFLVLFPLATLQLDADQPADRPARKKDIATKRHPLSDPDRRCCGWPCIPCLL*	ATGATGCTGAAAATGGGAGTGGTGCTATTCGTCTTTCTGGTCCTGTTTCCCCTGGCAACGCTCCAACTGGATGCAGATCAACCTGCAGACCGACCTGCGCGTAAAAAGGACATTGCAACTAAACGGCATCCCTTGTCTGATCCTGACAGACGGTGTTGCGGTTGGCCATGCATACCATGCCTCCTCTGA	3.66943	1	1
OK006_E_097	Conotoxin precursor	M	M-3a	OK006A_TRINITY_DN117_c0_g1_i18_Frame_R1	MMLKLSVVLFVFLVLFPLATLQLDADQPADRPARKKDIATKRHPLSDPDRRCCGWPCIPCLL*	ATGATGTTGAAACTGAGCGTGGTACTATTCGTCTTCCTGGTCCTGTTTCCCCTGGCAACGCTCCAACTGGATGCAGATCAACCTGCAGACCGACCTGCGCGTAAAAAGGACATTGCAACTAAACGGCATCCCTTGTCTGATCCTGACAGACGGTGTTGCGGTTGGCCATGCATACCATGCCTCCTCTGA	9406.89	1	1
OK006_E_098	Conotoxin precursor	M	M-3a-WF	OK006A_TRINITY_DN6984_c0_g2_i1_Frame_R3	MMSKLGFVLFTLLLLFPLATLPMEVDQPAERLVQDDETLNSAERTGAIMTLMRHLRQCYPFCA*	ATGATGTCGAAACTGGGATTTGTGCTATTCACCCTTCTGCTTTTGTTTCCCCTGGCAACACTCCCTATGGAAGTGGATCAACCAGCAGAGCGACTTGTGCAGGATGACGAGACCCTCAACTCAGCTGAAAGGACGGGAGCCATAATGACTCTTATGAGACATCTGCGTCAGTGTTACCCTTTTTGTGCCTGA	6.50561	1	1
OK006_E_099	Conotoxin precursor	M	M-3a-WF	OK006A_TRINITY_DN117_c0_g1_i20_Frame_R1	MMLKLRVVLFILLVLFPLTTLQLDADQPVERYVENKENLNPDERRKIILPALRTLISSGCGENPDWCK*	ATGATGTTGAAACTGAGAGTGGTACTATTCATCTTGCTGGTCCTGTTTCCCCTGACAACGCTCCAACTGGATGCAGATCAACCTGTAGAACGATATGTGGAGAACAAAGAGAACCTCAACCCAGATGAAAGGAGGAAAATCATATTGCCTGCTCTGAGGACTCTGATTTCATCTGGCTGCGGTGAGAATCCAGATTGGTGTAAATAG	35318.7	1	1
OK006_E_100	Conotoxin precursor	M	M-3a-WF	OK006A_TRINITY_DN9386_c0_g1_i3_Frame_R2	VERYVENKENLNPDERREIILPALRLQSSSRCSEDLFFCN*	GTAGAACGATATGTGGAGAACAAAGAGAACCTCAACCCAGATGAAAGGAGGGAAATCATATTGCCTGCTCTGAGGCTTCAGAGTTCATCTCGCTGCAGTGAGGATCTATTCTTCTGTAACTAG	4118.71	1	0
OK006_E_101	Conotoxin precursor	M	M-3a-WF	OK006A_TRINITY_DN9386_c0_g1_i5_Frame_R2	VERYVENKENLNPDERREIILPALRVQSLFDCIGYAGSCK*	GTAGAACGATATGTGGAGAACAAAGAGAACCTCAACCCAGATGAAAGGAGGGAAATCATATTGCCTGCTCTGAGGGTTCAGAGTTTATTTGACTGCATTGGGTATGCAGGTTCGTGTAAATAG	10384	1	0
OK006_E_102	Conotoxin precursor	M	M-3a-WF	OK006A_TRINITY_DN4946_c3_g1_i1_Frame_F2	MMLKLSVVLFILLVLFPMATLQLDADRPVERYVENKENLNSDERREI	ATGATGTTGAAACTGAGCGTGGTACTATTCATCTTGCTGGTCCTGTTTCCCATGGCAACGCTCCAACTGGATGCAGATCGACCTGTAGAACGATATGTGGAGAACAAAGAGAACCTCAACTCAGATGAAAGGAGGGAAATC	4938.82	0	0
OK006_E_103	Conotoxin precursor	M	M-3a-WF	OK006A_TRINITY_DN117_c0_g1_i6_Frame_R1	MMLKLRVVLFILLVLFPLTTLQLDADQPVERYVENKENLNPDERREIILPALRVQSLLDCIGDPGSCK*	ATGATGTTGAAACTGAGAGTGGTACTATTCATCTTGCTGGTCCTGTTTCCCCTGACAACGCTCCAACTGGATGCAGATCAACCTGTAGAACGATATGTGGAGAACAAAGAGAACCTCAACCCAGATGAAAGGAGGGAAATCATATTGCCTGCTCTGAGGGTTCAGAGTTTACTTGACTGCATTGGGGATCCAGGTTCGTGTAAATAG	8252.13	1	1
OK006_E_104	Conotoxin precursor	M	M-3a-WF	OK006A_TRINITY_DN174_c3_g1_i1_Frame_R2	MLKLSVVIFILLELFPLTTLQLDADQPVERYLENKENLNPDERREIILPALRVQSLVTCTMDWCK*	ATGTTGAAACTGAGCGTGGTAATATTCATCTTGCTGGAACTGTTTCCCCTGACAACGCTCCAACTGGACGCAGATCAACCTGTAGAACGATATTTGGAGAACAAAGAGAACCTCAACCCAGATGAAAGGAGGGAAATCATATTGCCTGCTCTGAGGGTTCAGAGTCTCGTTACCTGCACTATGGATTGGTGTAAATAG	2748.65	1	1
OK006_E_105	Conotoxin precursor	M	M-3a-WF	OK006A_TRINITY_DN4946_c0_g4_i1_Frame_R2	VVLFIFLVLFPLATLQLDADQPADRDAENKQDLNPDGRRGIILPALRSSSSCDWSSACHLPSERMTAFTANNAALELPYSGLVAPEQ*	GTGGTACTATTCATCTTCCTGGTCCTGTTTCCCCTGGCAACGCTCCAGCTGGATGCAGATCAACCTGCAGACCGAGATGCAGAGAACAAACAGGACCTCAACCCAGATGGAAGGAGGGGAATCATATTGCCTGCTCTGAGATCTTCGAGTTCATGTGACTGGAGTTCTGCGTGTCATCTTCCATCGGAACGAATGACTGCTTTTACAGCCAACAATGCCGCACTCGAATTACCCTACAGTGGTTTGGTTGCTCCAGAACAATGA	9.1122	1	0
OK006_E_106	Conotoxin precursor	M	M-3a-WF	OK006A_TRINITY_DN4946_c0_g6_i1_Frame_R2	VVLFIFLVLFPLATLQLDADHPVERYAGNKLDLNPDERREIILPALGHGRSSRCSGWRTC*	GTGGTACTATTCATCTTCCTGGTCCTGTTTCCCCTGGCAACGCTCCAGCTGGATGCAGATCATCCTGTAGAACGATATGCAGGGAACAAACTGGACCTTAACCCAGATGAAAGGAGAGAAATCATATTGCCTGCTCTTGGGCATGGGAGGTCTTCACGTTGCTCCGGTTGGCGGACTTGTTAG	6.5337	1	0
OK006_E_107	Conotoxin precursor	M	M-3a-WF	OK006A_TRINITY_DN1979_c0_g1_i2_Frame_F1	MFMMLKLRVVLFTLLDQVPMATLKLDADQPVKRYVENKENLNPD	ATGTTCATGATGTTGAAACTGAGAGTGGTACTATTTACCTTGCTGGACCAGGTACCCATGGCAACGCTCAAACTGGATGCAGATCAACCTGTAAAACGATATGTGGAGAACAAAGAGAACCTCAACCCAGAT	2600.51	0	0
OK006_E_108	Conotoxin precursor	M	M-3a-WF	OK006A_TRINITY_DN3064_c0_g1_i1_Frame_R2	MSKLGVVLFTFLLLFPLATLQRIQDQPADRNAEPRGKIRGRMNGFLTQMLFGHPDHNYAAWCPWCG*	ATGTCAAAACTGGGAGTCGTGCTGTTTACCTTTCTGCTTCTGTTTCCTCTGGCAACTCTTCAGCGCATTCAAGATCAACCTGCAGATCGTAATGCAGAGCCAAGGGGCAAGATCCGAGGTCGAATGAATGGATTCTTGACGCAAATGTTGTTCGGGCATCCAGATCATAATTATGCCGCCTGGTGTCCTTGGTGTGGCTGA	123.185	1	1
OK006_E_109	Conotoxin precursor	M	M-3b-WF	OK006A_TRINITY_DN2434_c0_g1_i1_Frame_R3	MSKLGVVLFIFLVLFPMATLQLDGDQTADRHADQRGQDLTEQQRNSKRVLKKRDWEYHAHPKPNSFWTLV*	ATGTCTAAACTGGGAGTCGTGTTGTTCATCTTTCTAGTTCTGTTTCCCATGGCAACTCTTCAGCTGGATGGAGATCAAACCGCTGATCGTCATGCAGACCAAAGGGGCCAGGACCTAACAGAACAGCAACGAAACTCGAAGCGTGTTCTGAAGAAAAGGGATTGGGAATACCATGCACATCCAAAACCCAATAGCTTCTGGACGCTTGTTTGA	3.65846	1	1
OK006_E_110	Conotoxin precursor	M	M-3b-WF	OK006A_TRINITY_DN2434_c0_g1_i3_Frame_R3	MSKLGVVLFIFLVLFPMATLQMDADQTADRHADERDQDRAEQNRNLMRVLKRGWTHHVKVEPNSFWSLV*	ATGTCTAAACTGGGAGTCGTGTTGTTCATCTTTCTAGTTCTGTTTCCCATGGCAACTCTTCAGATGGATGCAGATCAAACCGCTGATCGCCATGCAGACGAAAGGGACCAGGACCGAGCAGAACAGAATCGAAACTTGATGCGTGTTCTGAAAAGGGGTTGGACGCACCATGTAAAGGTAGAGCCCAATTCTTTTTGGTCGCTTGTTTGA	12.8511	1	1
OK006_E_111	Conotoxin precursor	M	M-3b-WF	OK006A_TRINITY_DN2434_c0_g1_i2_Frame_R3	MSKLGVVLFIFLVLFPMATLQMDADQTADRHADERDQDRAEQNRNLMRVLKRDWFHIDLTPNNKNTWWTLV*	ATGTCTAAACTGGGAGTCGTGTTGTTCATCTTTCTAGTTCTGTTTCCCATGGCAACTCTTCAGATGGATGCAGATCAAACCGCTGATCGCCATGCAGACGAAAGGGACCAGGACCGAGCAGAACAGAATCGAAACTTGATGCGTGTTCTGAAAAGGGATTGGTTCCATATAGATCTAACGCCAAACAACAAAAATACTTGGTGGACGCTTGTTTGA	16.5257	1	1
OK006_E_112	Conotoxin precursor	M	M-3b-WF	OK006A_TRINITY_DN2434_c0_g1_i5_Frame_R3	MSKLGVVLFIFLVLFPMATLQLDGDQPADRRADEKDLTQQYLNLRRVLQRGLVCAHASPYHNAVWS*	ATGTCTAAACTGGGAGTCGTGTTGTTCATCTTTCTAGTTCTGTTTCCCATGGCAACACTTCAGCTGGATGGAGATCAACCCGCTGATCGTCGTGCAGATGAAAAGGACCTAACACAACAGTATCTAAACTTGAGGCGTGTTCTGCAAAGGGGTTTGGTATGCGCTCATGCAAGTCCATACCACAATGCCGTCTGGTCGTGA	5.75897	1	1
OK006_E_113	Conotoxin precursor	M	M-3b-WF	OK006A_TRINITY_DN2434_c0_g1_i6_Frame_R3	MSKLGVVLFIFLVLFPMATLQLDGDQPADRRADEKDQDLTEQYLKLRRVLQRGLVCAHVSPSQNSWWT*	ATGTCTAAACTGGGAGTCGTGTTGTTCATCTTTCTAGTTCTGTTTCCCATGGCAACACTTCAGCTGGATGGAGATCAACCCGCTGATCGTCGTGCAGACGAAAAGGACCAGGACCTAACAGAACAGTATCTAAAATTGAGGCGTGTTCTGCAAAGGGGTTTGGTATGCGCTCATGTGAGTCCATCCCAAAATAGCTGGTGGACGTGA	0.530133	1	1
OK006_E_114	Conotoxin precursor	M	M-3b-WF	OK006A_TRINITY_DN2434_c0_g1_i4_Frame_R3	MSKLGVVLFIFLVLFPIATLQMDGDQLADRHAVERSQDPTQQYRNLRNVLKRSLRCSGGPKGNSFWTLV*	ATGTCTAAACTGGGAGTCGTGTTGTTCATCTTTCTAGTTCTGTTTCCCATCGCAACTCTTCAGATGGATGGAGATCAACTCGCTGATCGTCATGCAGTCGAAAGGAGCCAGGATCCAACACAACAGTATCGAAACTTGAGGAATGTTCTGAAAAGGAGTTTGAGATGCAGTGGTGGTCCAAAAGGTAATTCCTTCTGGACGCTTGTTTGA	1.87262	1	1
OK006_E_115	Conotoxin precursor	M	M-8	OK006A_TRINITY_DN323_c0_g1_i5_Frame_F3	MMLKLRVGVYILLVLLPLTTLQEKKDDASEAPVKQSDEKRAEGAILTPDLTRDTRDGCSNKRCNNTADCSTGCSCNWNLVVRNNTCVSD*	ATGATGTTGAAACTGAGAGTTGGGGTGTACATCCTCCTGGTTCTTTTGCCCCTGACAACCCTTCAAGAGAAAAAGGATGACGCCTCTGAAGCACCGGTCAAGCAGTCGGATGAGAAGCGTGCAGAGGGCGCTATCTTGACGCCCGATCTGACCAGAGATACACGTGACGGCTGTAGCAACAAACGATGCAACAATACTGCTGACTGTTCCACCGGTTGCTCTTGCAATTGGAACCTGGTTGTGCGGAACAACACCTGCGTCAGTGATTAA	16027.7	1	1
OK006_E_116	Conotoxin precursor	M	M-8	OK006A_TRINITY_DN323_c0_g1_i9_Frame_F2	MMLKLRVGVYILLVLLPLTTLQEKKDDASEAPVKQSDEKRAEGAILTPDLTRDTRDGCNNNGCNNTDDCPSGCSCNLNQFGRGNTCISD*	ATGATGTTGAAACTGAGAGTTGGGGTGTACATCCTCCTGGTTCTTTTGCCCCTGACAACCCTTCAAGAGAAAAAGGATGACGCCTCTGAAGCACCGGTCAAGCAGTCGGATGAGAAGCGTGCAGAGGGCGCTATCTTGACGCCCGATCTGACCAGAGATACACGTGACGGCTGTAACAACAACGGATGCAACAATACTGATGACTGTCCCTCCGGTTGCTCTTGCAATTTGAACCAGTTTGGGCGGGGCAACACCTGCATCAGTGATTAA	12517.4	1	1
OK006_E_117	Conotoxin precursor	O1	O1-1	OK006A_TRINITY_DN31642_c0_g1_i1_Frame_R1	MKLTSVVIVAVLFLAACQLTTSDGSRGTWKDRAVRSITKVSMLRWPCKVAGSPCGLVSECCGTCNVLRNRCV*	ATGAAACTGACGAGTGTGGTGATCGTCGCTGTGTTGTTCCTGGCGGCCTGTCAACTCACTACATCTGATGGCTCCAGAGGTACGTGGAAGGATCGTGCTGTGAGGTCGATCACCAAAGTCTCCATGTTGCGATGGCCCTGCAAGGTTGCCGGTAGTCCTTGTGGTCTTGTTAGTGAATGCTGCGGAACTTGCAATGTTTTACGCAATAGATGTGTGTGA	5.19151	1	1
OK006_E_118	Conotoxin precursor	O1	O1-1	OK006A_TRINITY_DN31385_c0_g1_i1_Frame_F1	MKLTCVVIVAVLLLTACQLITADDSRGTQKHRALKSDTKISMLTLRCASYGRPR	ATGAAACTGACGTGTGTGGTGATCGTCGCCGTGCTGCTCCTGACGGCCTGTCAACTCATCACAGCTGATGACTCCAGAGGTACGCAGAAGCATCGTGCCCTGAAGTCGGACACCAAAATCTCCATGTTAACTTTGCGCTGCGCATCTTACGGAAGACCTCGT	3.32874	0	0
OK006_E_119	Conotoxin precursor	O1	O1-1	OK006A_TRINITY_DN11916_c0_g1_i1_Frame_F3	MKLTCPLIVGLLFLSACQLTTTDDSRGRQGYHAVRTGTKMQNNKIFKLTKRCAAPGAPCSKYDNECCDACMLSHPNPPVCIV*	ATGAAACTGACGTGCCCTTTGATCGTCGGCTTGCTGTTCCTGTCGGCCTGCCAACTCACCACAACTGATGACTCCAGAGGTAGGCAGGGGTATCATGCTGTGAGGACGGGAACCAAGATGCAGAATAACAAGATCTTCAAGTTGACCAAGAGATGTGCTGCACCCGGCGCCCCTTGTAGCAAGTATGACAATGAGTGCTGCGATGCATGTATGTTATCACATCCGAATCCTCCAGTTTGCATAGTTTGA	2.55023	1	1
OK006_E_120	Conotoxin precursor	O1	O1-1	OK006A_TRINITY_DN14757_c0_g1_i1_Frame_R2	MKLTYALIVAMLFLMACQHITTDDSRGEQKYLAKRSKAKIQNFKLFKLTKRCDSPDAPCSLYEGVCCHVCQLQPGGPICVKG	ATGAAACTGACCTACGCTTTGATCGTCGCCATGCTGTTCCTGATGGCTTGTCAGCACATTACAACTGATGACTCCAGAGGTGAGCAGAAGTATCTTGCTAAGAGATCGAAAGCCAAGATACAGAATTTCAAGCTCTTCAAGTTGACCAAGAGATGCGATTCACCCGACGCCCCATGTTCGTTGTATGAGGGTGTTTGCTGCCATGTCTGTCAATTACAGCCAGGAGGTCCAATTTGCGTGAAAGGA	1.23155	0	0
OK006_E_121	Conotoxin precursor	O1	O1-1	OK006A_TRINITY_DN6097_c0_g1_i1_Frame_R1	MKLTCVPIVAMLFLMACQLITADYSREKHGYSAEKSSDKIQDSFYSKLTKRCTDEGGDCDPGNHNCCRGSCLVLQHKAVCGILYTMVSR*	ATGAAACTGACGTGCGTGCCGATTGTCGCCATGCTGTTCCTGATGGCCTGTCAACTCATTACAGCTGATTACTCTAGAGAGAAGCACGGGTATTCTGCTGAGAAGTCGAGTGACAAGATTCAGGATTCCTTTTACTCAAAGTTGACCAAGAGATGTACGGATGAGGGTGGTGATTGTGATCCTGGAAATCATAACTGCTGCAGGGGATCGTGTCTTGTTTTACAACACAAAGCCGTCTGTGGTATACTTTATACTATGGTCTCGCGGTAA	6.84671	1	1
OK006_E_122	Conotoxin precursor	O1	O1-1	OK006A_TRINITY_DN13580_c0_g1_i1_Frame_F1	MKLTCVLIAAGLLLTACQMITASEGVEEYPAQRSTDEMGNSEIKPLINLNKRCDPPGSYCGGTVIHRHCCSGRCYLFKCK*	ATGAAACTGACGTGTGTGCTGATTGCTGCTGGGCTGCTCTTGACAGCATGCCAGATGATTACCGCTTCGGAAGGAGTCGAGGAGTATCCTGCTCAGAGATCCACTGATGAGATGGGGAATTCCGAGATCAAGCCACTCATCAACTTGAACAAGAGATGCGACCCCCCTGGATCGTATTGTGGCGGGACTGTCATCCACAGGCATTGTTGCAGTGGCAGGTGTTATCTTTTCAAGTGCAAGTGA	2.37103	1	1
OK006_E_123	Conotoxin precursor	O1	O1-1	OK006A_TRINITY_DN31158_c0_g1_i1_Frame_F2	MKVTCVLIVAVLILTACQLITAEYSRDKVEYPAERSRITMKGFRPTWTKRCSTSSVPCLQNSNCCSGTCQHINLGHKTCM*	ATGAAAGTGACGTGCGTGTTGATCGTTGCCGTGCTGATCCTGACGGCCTGTCAGCTCATTACAGCTGAGTACTCCAGAGATAAGGTGGAGTATCCCGCTGAGAGGTCGAGAATCACGATGAAAGGTTTCAGGCCCACATGGACCAAGAGGTGCAGCACTTCCAGCGTTCCTTGTCTTCAGAACAGCAATTGCTGCAGTGGTACATGTCAGCATATAAATCTTGGGCATAAAACGTGCATGTAA	74.2922	1	1
OK006_E_124	Conotoxin precursor	O1	O1-2	OK006A_TRINITY_DN142_c0_g1_i8_Frame_R1	MKLTRVLIVAVLFLTACQLTAAETSSRSKQKYRVLRSTDKNSKWTRECTPPGGACNIHPHCCEEFCDMANNRCLEM*	ATGAAACTGACACGCGTGTTGATCGTCGCCGTGCTGTTCCTGACGGCCTGTCAACTCACTGCAGCTGAGACTTCCTCCAGAAGTAAGCAGAAGTATCGTGTTCTGAGGTCAACTGACAAAAACTCCAAGTGGACCAGGGAATGCACACCTCCCGGTGGAGCTTGTAATATTCATCCACATTGCTGCGAAGAATTTTGCGATATGGCAAACAACAGATGTTTGGAAATGTGA	23.2146	1	1
OK006_E_125	Conotoxin precursor	O1	O1-2	OK006A_TRINITY_DN142_c0_g1_i26_Frame_R1	MKLTCLMIVAVLFLTACQLTTAETYSRGKQKHRVLRSADKNPKWTRECTRPGGACYYDSHCCRHVCHEVFNTCM*	ATGAAATTGACGTGCTTGATGATCGTCGCCGTGCTGTTCCTGACGGCCTGTCAACTCACTACAGCTGAGACTTACTCCAGAGGTAAGCAGAAGCATCGTGTTCTGAGGTCAGCTGACAAAAACCCCAAGTGGACCAGGGAATGCACACGTCCCGGTGGAGCTTGTTATTATGATTCACATTGCTGCCGACACGTTTGCCACGAGGTATTCAACACATGTATGTAA	22.2158	1	1
OK006_E_126	Conotoxin precursor	O1	O1-2	OK006A_TRINITY_DN142_c0_g1_i12_Frame_R1	MKLTCVMIVAVLFLTACQLTTAETYSRGKQKHRVLRSADKNPKWTRECTRPGGACYYDSHCCRHVCHEVFNTCM*	ATGAAACTGACGTGCGTGATGATCGTCGCCGTGCTGTTCCTGACGGCCTGTCAACTCACTACAGCTGAGACTTACTCCAGAGGTAAGCAGAAGCATCGTGTTCTGAGGTCAGCTGACAAAAACCCCAAGTGGACCAGGGAATGCACACGTCCCGGTGGAGCTTGTTATTATGATTCACATTGCTGCCGACACGTTTGCCACGAGGTATTCAACACATGTATGTAA	8.33558	1	1
OK006_E_127	Conotoxin precursor	O1	O1-2	OK006A_TRINITY_DN142_c0_g1_i14_Frame_R1	MKLTCVLIIAVLFLTACQLTTAETYSRGKQKHRVLRSADKNPKWTRECTRPGGACYYDSHCCRHVCHEVFNTCM*	ATGAAACTGACGTGCGTGTTGATCATCGCCGTGCTGTTCCTGACGGCCTGTCAACTCACTACAGCTGAGACTTACTCCAGAGGTAAGCAGAAGCATCGTGTTCTGAGGTCAGCTGACAAAAACCCCAAGTGGACCAGGGAATGCACACGTCCCGGTGGAGCTTGTTATTATGATTCACATTGCTGCCGACACGTTTGCCACGAGGTATTCAACACATGTATGTAA	3.42697	1	1
OK006_E_128	Conotoxin precursor	O1	O1-2	OK006A_TRINITY_DN142_c0_g1_i32_Frame_R1	MKLTCVMIVAVLFLTACQLTTAEISSRGKQKYRVLRSADENPKWTRECTRPGGACYYDSHCCRHVCHEVFNTCM*	ATGAAACTGACGTGCGTGATGATCGTCGCCGTGCTGTTCCTGACGGCCTGTCAACTCACTACAGCTGAGATTTCCTCCAGAGGTAAGCAGAAGTATCGTGTTCTGAGGTCAGCTGACGAAAACCCCAAGTGGACCAGGGAATGCACACGTCCCGGTGGAGCTTGTTATTATGATTCACATTGCTGCCGACACGTTTGCCACGAGGTATTCAACACATGTATGTAA	29.1227	1	1
OK006_E_129	Conotoxin precursor	O1	O1-2	OK006A_TRINITY_DN142_c0_g1_i11_Frame_R1	MKLTCVLIIAVLFLTACQLTTAETYSRGKQKHRALRSTDKNSKMTKKCTQTNGACYHRDTCCSKSCNLTINRCLAS*	ATGAAACTGACGTGCGTGTTGATCATCGCCGTGCTGTTCCTGACGGCCTGTCAACTCACTACAGCTGAGACTTACTCCAGAGGTAAGCAGAAGCATCGTGCTCTGAGGTCAACTGACAAAAACTCCAAGATGACCAAGAAGTGCACGCAGACCAATGGAGCCTGTTATCATCGTGATACCTGCTGCAGCAAGTCTTGCAATCTCACGATCAATAGATGTCTGGCATCCTAA	6468.21	1	1
OK006_E_130	Conotoxin precursor	O1	O1-2	OK006A_TRINITY_DN142_c0_g1_i17_Frame_R1	MKLTCVMIVAVLFLTACQLTTAETYSRGKQKHRALRSTDKNSKMTKKCTQTNGACYHRDTCCSKSCNLTINRCLAS*	ATGAAACTGACGTGCGTGATGATCGTCGCCGTGCTGTTCCTGACGGCCTGTCAACTCACTACAGCTGAGACTTACTCCAGAGGTAAGCAGAAGCATCGTGCTCTGAGGTCAACTGACAAAAACTCCAAGATGACCAAGAAGTGCACGCAGACCAATGGAGCCTGTTATCATCGTGATACCTGCTGCAGCAAGTCTTGCAATCTCACGATCAATAGATGTCTGGCATCCTAA	0.505731	1	1
OK006_E_131	Conotoxin precursor	O1	O1-2	OK006A_TRINITY_DN142_c0_g4_i1_Frame_R2	MKLTCVLIIAVLFLMDNQLITADYSRDEQVYRAVRLRDAMQKSKGSGSCAYISEPCDILPCCPGLKCNEDFVPICL*	ATGAAACTGACGTGCGTGTTGATCATCGCCGTGCTGTTCCTGATGGACAATCAGCTCATTACAGCTGATTACTCCAGAGATGAGCAGGTATACCGTGCAGTGAGGTTGAGAGACGCAATGCAGAAATCTAAAGGTTCTGGGTCGTGCGCGTACATAAGTGAACCTTGTGATATTCTCCCTTGCTGCCCTGGTCTGAAGTGCAATGAGGACTTTGTACCCATATGTCTCTGA	16.2484	1	1
OK006_E_132	Conotoxin precursor	O1	O1-3	OK006A_TRINITY_DN18666_c0_g1_i1_Frame_R3	VAVLFLTVWTCATADDSGNGLENLFSKAHHEMKNPKDSKLNKRCLDGGEICGILFPSCCSGWCIVLVCA*	GTTGCTGTGCTGTTCTTGACCGTCTGGACATGCGCCACGGCTGATGACTCCGGAAATGGATTGGAGAATCTTTTTTCGAAGGCACATCACGAGATGAAGAACCCCAAAGACTCTAAATTGAACAAGAGGTGCCTTGACGGTGGTGAAATTTGTGGTATTTTGTTTCCAAGCTGCTGCAGTGGGTGGTGCATTGTTCTCGTCTGCGCATGA	1.98277	1	0
OK006_E_133	Conotoxin precursor	O1	O1-3	OK006A_TRINITY_DN5287_c0_g1_i14_Frame_R1	MKLTCMMIVAVLFLTAWTFVTADDSRNELEDPFLKAFNEMKNPEASKLNKKDCLPDGSLCGVNT	ATGAAACTGACGTGCATGATGATCGTTGCTGTGCTGTTCTTGACCGCCTGGACATTCGTCACGGCTGATGACTCCAGAAATGAATTGGAGGATCCTTTTCTGAAGGCATTTAACGAAATGAAGAACCCCGAAGCCTCTAAATTGAACAAGAAAGACTGCTTGCCTGATGGTTCACTTTGTGGCGTGAATACA	3.15336	0	0
OK006_E_134	Conotoxin precursor	O1	O1-3	OK006A_TRINITY_DN5287_c0_g1_i3_Frame_R3	MKLTCMMIVAVLFLTAWTFVTADDSRNELEDPFLKAFNEMKNPEASKLNQREACYNAGSFCGINPGLCCSEF	ATGAAACTGACGTGCATGATGATCGTTGCTGTGCTGTTCTTGACCGCCTGGACATTCGTCACGGCTGATGACTCCAGAAATGAATTGGAGGATCCTTTTCTGAAGGCATTTAACGAAATGAAGAACCCCGAAGCCTCTAAATTGAACCAGAGAGAAGCCTGCTATAATGCTGGTTCATTTTGTGGCATCAATCCAGGACTCTGCTGCAGCGAGTTT	3.78763	0	0
OK006_E_135	Conotoxin precursor	O1	O1-3	OK006A_TRINITY_DN5287_c3_g1_i1_Frame_F3	AWTFVTAVPHSSDVLENLYLKALHETENHEASKLNVRNDECEPPGDFCGFFKIGPPCCSGWCFLWCA*	GCCTGGACATTCGTCACGGCTGTGCCTCACTCCAGCGATGTATTGGAGAATCTTTATCTGAAGGCACTTCACGAAACGGAAAACCACGAAGCCTCTAAATTGAACGTGAGAAACGACGAGTGCGAACCTCCTGGAGATTTTTGTGGCTTTTTTAAAATTGGGCCGCCTTGCTGCAGTGGCTGGTGCTTCCTCTGGTGCGCCTAA	1.89035	1	0
OK006_E_136	Conotoxin precursor	O1	O1-3	OK006A_TRINITY_DN5287_c0_g1_i5_Frame_R1	MKLTCMMIVAVLFLTAWTFVTADDSRNVLDNPFLKARHEMKNPQASRSRGRCRPRGTLCGFPKPGPYCCNGWCIVFCV*	ATGAAACTGACGTGCATGATGATCGTTGCTGTGCTGTTCTTGACCGCCTGGACATTCGTCACGGCTGATGACTCCAGAAATGTATTGGACAATCCTTTTCTGAAGGCACGTCACGAAATGAAGAACCCCCAAGCCTCTAGATCGAGAGGTAGGTGCCGTCCTAGGGGTACGCTTTGTGGCTTTCCGAAACCTGGACCATACTGCTGCAATGGCTGGTGCATTGTCTTCTGCGTCTAA	4.44325	1	1
OK006_E_137	Conotoxin precursor	O1	O1-3	OK006A_TRINITY_DN5287_c0_g1_i15_Frame_R3	MKLTCMMIVAVLFLTAWTLVMADDSNNGLANHFLKSRDEMEDPEASKLEKRACSKKWEYCIVPILGFVYCCPGLICGPFVCV*	ATGAAACTGACGTGCATGATGATCGTTGCTGTGCTGTTCTTGACAGCCTGGACGCTCGTCATGGCTGATGACTCCAACAATGGACTGGCGAATCATTTTTTGAAATCACGTGACGAAATGGAGGACCCCGAAGCTTCTAAATTGGAGAAAAGGGCGTGCAGCAAAAAATGGGAATATTGTATAGTACCGATCCTTGGATTCGTATATTGCTGCCCTGGCTTAATCTGTGGTCCTTTCGTCTGCGTTTGA	4.0216	1	1
OK006_E_138	Conotoxin precursor	O1	O1-3	OK006A_TRINITY_DN5287_c0_g1_i21_Frame_R1	MKLTCMMIVAVLFLTAWTFVTAEDSNNGLANLFSKAREELKNPTDDILNNNKRCVGENEPCIIPLLGTIICCTGVCLIVCVG*	ATGAAACTGACGTGCATGATGATCGTTGCTGTGCTGTTCTTGACAGCCTGGACATTCGTCACGGCTGAAGATTCTAACAATGGACTGGCGAATCTTTTTTCGAAGGCACGTGAGGAATTGAAGAACCCCACAGATGACATATTGAACAACAATAAAAGGTGCGTTGGAGAGAATGAACCTTGTATAATACCCCTCCTTGGGACCATCATATGCTGCACGGGCGTATGTCTCATCGTCTGCGTCGGTTAA	0.837833	1	1
OK006_E_139	Conotoxin precursor	O1	O1-3	OK006A_TRINITY_DN292_c6_g1_i18_Frame_R3	MKMTYILIVAVLFLTAWTSVTAGDFKNKLKNLSLKARKEVENPKASKLHQKRCVQTGGSCPSTNGCCNGLCNVNRCA*	ATGAAAATGACGTACATACTGATCGTTGCTGTGCTGTTCTTGACTGCCTGGACATCCGTCACGGCTGGTGACTTCAAAAATAAACTGAAGAATCTTTCTTTGAAGGCACGTAAAGAAGTGGAGAACCCCAAAGCCTCTAAATTGCACCAGAAAAGATGCGTACAGACGGGTGGTTCGTGTCCATCGACTAACGGATGCTGCAATGGCTTATGTAATGTTAACAGGTGCGCCTAG	31513.3	1	1
OK006_E_140	Conotoxin precursor	O1	O1-3	OK006A_TRINITY_DN292_c6_g1_i2_Frame_R3	MKMTYILIVAVLFLTAWTSVTAGDFKNKLKNLSLKARKEVENPKASKLHQKACVNRGDPCQRTVRCCSRRCGINGCT*	ATGAAAATGACGTACATACTGATCGTTGCTGTGCTGTTCTTGACTGCCTGGACATCCGTCACGGCTGGTGACTTCAAAAATAAACTGAAGAATCTTTCTTTGAAGGCACGTAAAGAAGTGGAGAACCCCAAAGCCTCTAAATTGCACCAGAAAGCATGCGTAAACAGGGGTGATCCGTGTCAAAGGACTGTCAGATGCTGCAGTCGCAGATGTGGTATTAACGGCTGCACCTAG	33718.2	1	1
OK006_E_141	Conotoxin precursor	O1	O1-3	OK006A_TRINITY_DN6311_c0_g1_i1_Frame_F1	RKEVENPKASKLHEKSCIRKGEPCNSSVPCCSGICGYFNCA*	CGTAAAGAAGTGGAGAACCCCAAAGCCTCTAAATTGCACGAGAAATCATGCATTAGGAAGGGTGAGCCTTGTAACTCGTCTGTCCCATGCTGCAGTGGCATATGTGGTTATTTCAACTGCGCCTAG	14.609	1	0
OK006_E_142	Conotoxin precursor	O1	O1-3	OK006A_TRINITY_DN292_c6_g1_i13_Frame_R3	MKMTYIMIVAVLLLTAWTFVTADDYKYGLENRFSKARNEVENPKASELDKRSCYEAGEFCFFSVPGLFICCSSVCLFHVCL*	ATGAAAATGACGTACATAATGATCGTTGCTGTGCTGTTATTGACTGCCTGGACATTCGTCACGGCTGATGACTACAAATATGGACTGGAGAATCGTTTTTCGAAGGCACGTAACGAAGTGGAGAACCCCAAAGCCTCTGAATTGGACAAGAGGAGCTGCTATGAGGCGGGTGAATTTTGTTTCTTCTCGGTCCCTGGACTCTTCATATGCTGCAGTAGCGTGTGCCTTTTCCACGTCTGCCTCTAG	13.701	1	1
OK006_E_143	Conotoxin precursor	O2	O2-2	OK006A_TRINITY_DN41398_c0_g1_i1_Frame_R2	MEKLTILLLVALVLMSIQALIQEKRQQAKINFSSKRKPSAKRWWGHDECTYWLGHCMVDSECCSDSCEERFCGLW*	ATGGAGAAACTGACAATCCTGCTTCTTGTTGCTCTTGTACTGATGTCGATCCAGGCCCTAATTCAAGAAAAACGCCAACAGGCAAAAATCAACTTCTCTTCAAAAAGAAAGCCATCTGCTAAGCGTTGGTGGGGACACGACGAATGCACTTATTGGTTGGGGCATTGTATGGTGGACTCGGAATGCTGTTCTGATAGTTGTGAGGAAAGGTTCTGCGGGTTATGGTGA	1.17916	1	1
OK006_E_144	Conotoxin precursor	O2	O2-2	OK006A_TRINITY_DN47_c0_g1_i4_Frame_R1	MQKLTMLLLVAAVLMSTQALIQGGAKNRLKENMKLFSKRKAAAERGIWHDCKDWLAGCSSHMECCSENCETFCRLW*	ATGCAGAAACTGACAATGCTGCTTCTTGTTGCTGCTGTACTGATGTCGACCCAGGCCCTGATTCAAGGGGGTGCAAAAAACCGCCTAAAGGAGAACATGAAATTGTTTTCAAAAAGAAAGGCAGCTGCTGAGAGGGGGATATGGCACGATTGCAAAGATTGGTTAGCGGGGTGTTCGTCGCACATGGAATGTTGCTCTGAGAACTGTGAAACGTTCTGCAGGTTGTGGTGA	7.84003	1	1
OK006_E_145	Conotoxin precursor	O2	O2-2	OK006A_TRINITY_DN47_c0_g1_i3_Frame_R2	MEKLAMLLLVAAVLMSTQALIQGGAKNRLKENMKLFSKRKAAAERGIWHDCKDWLAGCSSHMECCSENCETFCRLW*	ATGGAGAAACTGGCAATGCTGCTTCTTGTTGCTGCTGTACTGATGTCGACCCAGGCCCTGATTCAAGGGGGTGCAAAAAACCGCCTAAAGGAGAACATGAAATTGTTTTCAAAAAGAAAGGCAGCTGCTGAGAGGGGGATATGGCACGATTGCAAAGATTGGTTAGCGGGGTGTTCGTCGCACATGGAATGTTGCTCTGAGAACTGTGAAACGTTCTGCAGGTTGTGGTGA	2.87447	1	1
OK006_E_146	Conotoxin precursor	O2	O2-2	OK006A_TRINITY_DN47_c0_g1_i10_Frame_R1	MEKLAMLLLVAAVLMSTQALIQEERPKKRIRFLSKRKTEAEIWWEGECTDWLGSCLSPSDCCFEHCETFCRLW*	ATGGAGAAACTGGCAATGCTGCTTCTTGTTGCTGCTGTACTGATGTCGACCCAGGCCCTGATTCAAGAAGAACGCCCAAAGAAGAGAATCAGATTTTTGTCAAAAAGAAAGACAGAAGCTGAGATTTGGTGGGAGGGCGAATGCACTGATTGGTTAGGGAGTTGTTTGTCGCCCTCAGACTGCTGTTTTGAGCATTGTGAAACGTTCTGCAGGTTGTGGTGA	4.59489	1	1
OK006_E_147	Conotoxin precursor	O2	O2-2	OK006A_TRINITY_DN47_c0_g1_i7_Frame_R3	MQKLTILLLVAAVLMSIQALNQRGGVKRPREMIKYLSKRRTALECWWEGECSGWSVYCTKHSECCSGECIGYYCDLW*	ATGCAGAAACTTACAATCCTGCTTCTTGTGGCTGCTGTACTGATGTCGATCCAGGCTCTGAATCAACGTGGTGGAGTAAAACGTCCAAGGGAGATGATCAAATATTTATCAAAAAGAAGGACAGCTCTTGAGTGTTGGTGGGAAGGCGAATGCAGTGGTTGGTCCGTGTATTGCACGAAGCACTCGGAATGTTGTTCTGGTGAATGTATTGGTTATTACTGTGACTTGTGGTGA	23.5071	1	1
OK006_E_148	Conotoxin precursor	O2	O2-2	OK006A_TRINITY_DN47_c0_g1_i5_Frame_R3	MQKLTILLLVAAVLMSIQALNQRGGVKRPREMIKYLSKRRTALECWWEGECSGWSVYCTKHSECCSGECGGNYCELW*	ATGCAGAAACTTACAATCCTGCTTCTTGTGGCTGCTGTACTGATGTCGATCCAGGCTCTGAATCAACGTGGTGGAGTAAAACGTCCAAGGGAGATGATCAAATATTTATCAAAAAGAAGGACAGCTCTTGAGTGTTGGTGGGAAGGCGAATGCAGTGGTTGGTCCGTGTATTGCACGAAGCACTCGGAATGTTGTTCTGGTGAATGTGGTGGTAATTACTGTGAATTGTGGTGA	14.9858	1	1
OK006_E_149	Conotoxin precursor	O2	O2-2	OK006A_TRINITY_DN47_c0_g1_i6_Frame_R1	MQKLTMLLLVAAVLMSIQALNQGDGVKSPREKINFLSKRKTTAESWWEGECSGWSVYCTSDAECCSGECGNHYCELF*	ATGCAGAAACTGACAATGCTGCTTCTTGTTGCTGCTGTACTGATGTCGATCCAGGCTCTGAATCAAGGTGATGGAGTAAAAAGCCCAAGGGAGAAGATCAACTTTTTATCAAAACGAAAGACAACTGCTGAGAGTTGGTGGGAGGGCGAATGCAGCGGTTGGTCCGTGTATTGCACGTCGGACGCGGAATGTTGTTCTGGTGAATGTGGTAATCATTACTGTGAATTGTTCTGA	100.232	1	1
OK006_E_150	Conotoxin precursor	O2	O2-2	OK006A_TRINITY_DN47_c0_g1_i9_Frame_R3	MQKLTMLLLVAAVLMSIQALNQGDGVKSPREKINFLSKRKTTAESWWEGECSGWSVYCTSDAECCSGECGGNYCELW*	ATGCAGAAACTGACAATGCTGCTTCTTGTTGCTGCTGTACTGATGTCGATCCAGGCTCTGAATCAAGGTGATGGAGTAAAAAGCCCAAGGGAGAAGATCAACTTTTTATCAAAACGAAAGACAACTGCTGAGAGTTGGTGGGAGGGCGAATGCAGCGGTTGGTCCGTGTATTGCACGTCGGACGCGGAATGTTGTTCTGGTGAATGTGGTGGTAATTACTGTGAATTGTGGTGA	0.662133	1	1
OK006_E_151	Conotoxin precursor	O2	O2-2	OK006A_TRINITY_DN47_c0_g1_i1_Frame_R2	MEKLAMLLLVAAVLMSIQALNQGDGVKSPREKINFLSKRKTTAESWWEGECSGWSVYCTSDAECCSGECIGYYCDLW*	ATGGAGAAACTGGCAATGCTGCTTCTTGTTGCTGCTGTACTGATGTCGATCCAGGCTCTGAATCAAGGTGATGGAGTAAAAAGCCCAAGGGAGAAGATCAACTTTTTATCAAAACGAAAGACAACTGCTGAGAGTTGGTGGGAGGGCGAATGCAGCGGTTGGTCCGTGTATTGCACGTCGGACGCGGAATGTTGTTCTGGTGAATGTATTGGTTATTACTGTGACTTGTGGTGA	0.398334	1	1
OK006_E_152	Conotoxin precursor	O2	O2-2	OK006A_TRINITY_DN47_c0_g1_i2_Frame_R1	MQKLTMLLLVAAVLMSIQALNQGDGVKSPREKINFLSKRKTTAESWWEGECSGWSVYCTSDAECCSGECIGYYCDLW*	ATGCAGAAACTGACAATGCTGCTTCTTGTTGCTGCTGTACTGATGTCGATCCAGGCTCTGAATCAAGGTGATGGAGTAAAAAGCCCAAGGGAGAAGATCAACTTTTTATCAAAACGAAAGACAACTGCTGAGAGTTGGTGGGAGGGCGAATGCAGCGGTTGGTCCGTGTATTGCACGTCGGACGCGGAATGTTGTTCTGGTGAATGTATTGGTTATTACTGTGACTTGTGGTGA	0	1	1
OK006_E_153	Conotoxin precursor	O2	O2-2	OK006A_TRINITY_DN22232_c0_g1_i2_Frame_R3	MQKLTILLLLAAVLMSTQALIQGGVEKRQMAKIDFSKRKSTAESWWEGECRTWNAPCRLDSE	ATGCAGAAACTGACAATCCTGCTTCTTCTTGCTGCTGTACTGATGTCGACCCAGGCCCTTATTCAAGGTGGTGTAGAAAAACGTCAAATGGCGAAGATCGACTTTTCAAAAAGAAAGTCAACTGCTGAGAGTTGGTGGGAGGGCGAATGCAGGACTTGGAATGCGCCGTGTAGGCTTGACTCGGAG	1.22151	0	0
OK006_E_154	Conotoxin precursor	O2	O2-2	OK006A_TRINITY_DN22232_c1_g1_i2_Frame_R1	MEKLTILLLVAALLMSTQGLIQSGGENRPKEKIKFLSKRKSVAESWWEGECLGWSNYCTSHSICCSGECILSYCDIW*	ATGGAGAAACTGACAATCCTGCTTCTTGTTGCTGCTTTACTGATGTCGACTCAGGGCCTGATTCAAAGTGGTGGAGAAAACCGCCCAAAGGAGAAGATCAAATTTTTATCAAAGAGAAAATCAGTAGCTGAGAGTTGGTGGGAAGGCGAATGCTTGGGTTGGTCCAATTATTGTACTTCGCACAGCATTTGTTGTTCTGGTGAATGTATTCTTAGTTACTGCGATATTTGGTGA	8.6904	1	1
OK006_E_155	Conotoxin precursor	O2	O2-2	OK006A_TRINITY_DN37504_c0_g1_i1_Frame_R2	EKLTIQLLVAAVLMSTQALVQSGAEKRPWENIRFLSKRQASWEVWWEGNCIEWLASCSTDEQCCSGACGDYCTLW*	GAGAAACTGACAATCCAGCTCCTTGTTGCTGCTGTGCTGATGTCGACCCAGGCCCTGGTTCAAAGTGGTGCAGAAAAACGCCCATGGGAGAATATCAGATTTTTATCAAAAAGACAGGCAAGCTGGGAGGTATGGTGGGAAGGCAATTGCATTGAGTGGTTAGCATCGTGTTCGACGGACGAGCAATGCTGTTCGGGTGCTTGTGGGGACTACTGTACCCTGTGGTGA	1.09217	1	0
OK006_E_156	Conotoxin precursor	O2	O2-2	OK006A_TRINITY_DN22232_c0_g1_i1_Frame_R3	MQKLTILLLLAAVLMSTQALIQGGVEKSPKEKIRGFSEIWYTIWRWYHGKCKGWSNGCVRHSECCSYNCKGMYCDI*	ATGCAGAAACTGACAATCCTGCTTCTTCTTGCTGCTGTACTGATGTCGACCCAGGCCCTGATTCAAGGTGGTGTAGAAAAAAGCCCAAAGGAGAAGATCAGAGGTTTCTCAGAAATATGGTACACTATTTGGAGGTGGTATCATGGCAAATGCAAGGGTTGGAGCAATGGTTGTGTGCGGCACTCGGAATGTTGTTCTTATAATTGTAAGGGAATGTACTGCGACATTTAG	20.1234	1	1
OK006_E_157	Conotoxin precursor	O2	O2-4	OK006A_TRINITY_DN5694_c0_g1_i15_Frame_R3	MEKMTILLLVAAVLLSTQVLVQGDEEKPQEPTTNLFTARILSGNNQKSCNPKGHHCLYDWECCKNICIAREYICG*	ATGGAGAAAATGACAATCCTGCTTCTTGTTGCTGCTGTGCTGTTGTCGACCCAGGTCCTGGTTCAAGGTGATGAAGAAAAACCCCAGGAACCGACGACCAACCTTTTTACAGCAAGAATATTATCGGGAAATAACCAAAAAAGTTGTAACCCGAAAGGTCATCACTGCCTCTATGATTGGGAATGCTGCAAAAATATTTGTATAGCCCGTGAGTATATATGCGGTTAG	4.62905	1	1
OK006_E_158	Conotoxin precursor	O2	O2-4	OK006A_TRINITY_DN5694_c0_g1_i12_Frame_R1	MEKMTILLLVAAVLLSTQVLVQGDEEKPQEPTTNLFTARMLSGNKRKRCRTNGERCISDSQCCSYYCIIISVDDVSRCHLV*	ATGGAGAAAATGACAATCCTGCTTCTTGTTGCTGCTGTGCTGTTGTCGACCCAGGTCCTGGTTCAAGGTGATGAAGAAAAACCCCAGGAACCGACGACCAACCTTTTTACAGCAAGAATGTTATCGGGAAATAAGCGAAAAAGGTGTCGCACAAATGGGGAACGGTGCATCTCTGACTCGCAATGCTGCAGTTATTATTGTATTATTATCAGCGTAGATGATGTTAGTAGATGCCACTTAGTCTGA	1.27185	1	1
OK006_E_159	Conotoxin precursor	O2	O2-4	OK006A_TRINITY_DN5694_c0_g1_i22_Frame_R1	MEKMTILLLVAAVLLSTQVLVQGDEEKPQEPTTNLFTARMLSGIKQKRCHTNGQWCIADAQCCSNYCRHTSDYVVSRCRSLT*	ATGGAGAAAATGACAATCCTGCTTCTTGTTGCTGCTGTGCTGCTGTCGACCCAGGTCCTGGTCCAAGGTGATGAAGAAAAACCCCAGGAACCGACGACCAACCTTTTTACAGCAAGAATGTTATCGGGAATTAAGCAAAAAAGGTGTCACACGAATGGGCAATGGTGCATCGCTGATGCGCAATGCTGCAGTAATTATTGTAGACACACCAGCGATTATGTTGTTAGTAGATGCCGCAGTCTGACCTAA	2.86042	1	1
OK006_E_160	Conotoxin precursor	O2	O2-4	OK006A_TRINITY_DN5694_c0_g1_i11_Frame_R1	MEKMTILLLVAAVLLSTQVLVQGDEEKPQEPTTNLFTARMLSGNKRKRCHTNGERCISDAQCCSNYCRHTSDYVVSRCRSLT*	ATGGAGAAAATGACAATCCTGCTTCTTGTTGCTGCTGTGCTGTTGTCGACCCAGGTCCTGGTTCAAGGTGATGAAGAAAAACCCCAGGAACCGACGACCAACCTTTTTACAGCAAGAATGTTATCGGGAAATAAGCGAAAAAGGTGTCACACGAATGGGGAACGGTGCATCTCTGATGCGCAATGCTGCAGTAATTATTGTAGACACACCAGCGATTATGTTGTTAGTAGATGCCGCAGTCTGACCTAA	0.869284	1	1
OK006_E_161	Conotoxin precursor	O2	O2-4	OK006A_TRINITY_DN5694_c0_g1_i6_Frame_R1	MEKMTILLLVAAVLLSTQVLVQGDEEKPQEPTTNLFTARMLSGNKKKRCIKIGQPCFHNEECCSDDCVAPYNKCYWR*	ATGGAGAAAATGACAATCCTGCTTCTTGTTGCTGCTGTGCTGTTGTCGACCCAGGTCCTGGTTCAAGGTGATGAAGAAAAACCCCAGGAACCGACGACCAACCTTTTTACAGCAAGAATGTTATCGGGAAATAAAAAAAAAAGGTGTATCAAGATTGGGCAACCATGCTTCCATAATGAGGAGTGCTGCAGTGATGATTGTGTAGCCCCCTATAATAAATGCTATTGGCGGTAG	0.756358	1	1
OK006_E_162	Conotoxin precursor	O2	O2-4	OK006A_TRINITY_DN5694_c0_g1_i1_Frame_R3	MEKMTILLLVAAVLLSTQVLVQGDEENPHKATTKLFTGRMLSGNKQKRCRSRGQPCSYNTECCSTRCKRHQHKCL*	ATGGAGAAAATGACAATCCTGCTTCTTGTTGCTGCTGTGCTGTTGTCGACCCAGGTCCTGGTTCAAGGTGATGAAGAAAACCCCCACAAGGCGACGACCAAGCTTTTTACAGGAAGAATGTTATCGGGAAATAAGCAAAAAAGGTGTCGCTCGCGTGGGCAACCCTGCAGCTATAATACGGAATGCTGCAGTACTCGTTGTAAACGCCATCAGCATAAATGCTTGTAG	32.4778	1	1
OK006_E_163	Conotoxin precursor	O2	O2-4	OK006A_TRINITY_DN5694_c0_g1_i5_Frame_R1	MEKMTILLLVAAVLLSTQVLVQGDEEIPQKAMIDSIAGRMLSENYQKRCIKNGELCHSNWECCSDNCSGPEGHHPRCH*	ATGGAGAAAATGACAATCCTGCTTCTTGTTGCTGCTGTGCTGTTGTCGACCCAGGTCCTGGTTCAAGGTGATGAAGAAATACCCCAGAAGGCGATGATCGACTCTATTGCAGGAAGAATGTTATCGGAAAATTACCAAAAAAGGTGTATCAAGAATGGGGAGTTATGCCACAGTAATTGGGAGTGCTGCAGTGATAACTGTTCTGGCCCCGAGGGCCACCATCCTAGATGCCATTGA	10.1254	1	1
OK006_E_164	Conotoxin precursor	O2	O2-4	OK006A_TRINITY_DN45657_c0_g1_i1_Frame_F1	LLSTQVLVQGDGEKPRKATTNFFTTRMLLGNDQKRCLVSGKQCSNNAECCSSICVQTRHRCSWQLW*	CTGTTGTCGACCCAGGTCCTGGTTCAAGGTGATGGAGAAAAACCCCGGAAGGCGACGACCAACTTTTTTACAACAAGAATGTTATTGGGAAATGACCAAAAAAGGTGTCTCGTGAGTGGGAAACAGTGCAGCAATAATGCGGAGTGCTGCAGTAGTATTTGTGTACAAACCCGTCATAGATGCTCTTGGCAGTTGTGGTAG	2.2041	1	0
OK006_E_165	Conotoxin precursor	O2	O2-4	OK006A_TRINITY_DN5694_c0_g1_i4_Frame_R3	MEKMTILLLVAAVLLTQVLVQCDGGNPQKSPIDFFTGRMLSGNKQRGCVKSGKKCNSAKRCCRDLCFALTLRCF*	ATGGAGAAAATGACAATCCTGCTTCTTGTTGCCGCTGTGCTGTTGACCCAGGTCCTGGTTCAATGTGATGGAGGAAACCCCCAGAAGTCGCCGATCGACTTTTTTACAGGACGAATGTTATCAGGAAATAAGCAAAGGGGTTGTGTCAAGAGTGGGAAGAAATGTAACTCGGCTAAGAGATGCTGCCGTGATTTGTGCTTTGCCCTCACCCTTAGATGCTTTTAG	2.43849	1	1
OK006_E_166	Conotoxin precursor	O2	O2-10	OK006A_TRINITY_DN5584_c0_g1_i1_Frame_F3	MMEKLAMLILGATVLLLIQAIVGGDRGNDEGGWRRFLDLEKRCKNNSEPCTDTSECCNDLECSCLQPAACSDQTRGKCRPR*	ATGATGGAAAAACTAGCAATGCTGATTCTTGGTGCCACTGTCCTGCTGCTGATCCAGGCCATTGTTGGAGGTGACAGAGGTAACGATGAAGGTGGATGGAGAAGATTTTTGGACCTCGAGAAGCGTTGCAAGAACAACAGCGAGCCTTGCACGGACACCAGCGAATGCTGCAATGATTTAGAATGCAGCTGCCTTCAACCGGCTGCCTGCTCTGACCAAACCAGGGGAAAATGTAGACCACGTTAA	2.00127	1	1
OK006_E_167	Conotoxin precursor	O2	O2-WF	OK006A_TRINITY_DN4946_c0_g1_i2_Frame_R3	MEKLTILFLVVAVLLSTQVMVQGDGDQPADRDAVPRDDNPGGASGKFMNALRQRGCPWDPWCG*	ATGGAGAAACTGACAATACTGTTTCTTGTTGTTGCTGTACTGTTGTCGACCCAGGTCATGGTACAAGGTGACGGAGATCAACCAGCAGATCGTGATGCAGTGCCAAGAGACGATAACCCTGGTGGAGCGAGTGGAAAGTTCATGAATGCTCTACGTCAGCGTGGATGTCCGTGGGATCCTTGGTGTGGCTGA	4.87921	1	1
OK006_E_168	Conotoxin precursor	O2	O2-WF	OK006A_TRINITY_DN9032_c0_g1_i2_Frame_F3	AILLSTQVTVQGDRDQPADRNAVPRDDNPDGMSGQFMNVLRRSGCPWEPWCG*	GCTATACTGTTGTCGACCCAGGTCACGGTTCAAGGTGACAGAGATCAACCTGCAGATCGTAATGCAGTGCCAAGAGACGATAACCCAGATGGAATGAGTGGACAGTTCATGAATGTTCTACGTCGGTCTGGATGTCCGTGGGAACCTTGGTGTGGCTGA	2.98801	1	0
OK006_E_169	Conotoxin precursor	O2	O2-WF	OK006A_TRINITY_DN11907_c0_g2_i1_Frame_F1	MGKLTILLLVAAALLSTQVMVQGGGDQPAARNAVPRDDNPDGM	ATGGGGAAGCTGACAATTCTGCTTCTTGTTGCTGCTGCACTGTTGTCGACCCAGGTCATGGTTCAAGGTGGCGGAGATCAACCTGCAGCTCGTAATGCAGTGCCAAGAGACGATAACCCAGATGGAATG	6.16174	0	0
OK006_E_170	Conotoxin precursor	O2	O2-WF	OK006A_TRINITY_DN9032_c0_g1_i1_Frame_F3	AILLSTQVTVQGDRDQPADRNAVPRDDNPGRATRKFMKVLQGRGSECPWKPWCG*	GCTATACTGTTGTCGACCCAGGTCACGGTTCAAGGTGACAGAGATCAACCTGCAGATCGTAATGCAGTGCCAAGAGACGATAACCCAGGCAGAGCGACAAGAAAGTTCATGAAAGTTCTGCAAGGACGTGGGTCTGAATGTCCGTGGAAACCTTGGTGTGGCTGA	5.21056	1	0
OK006_E_171	Conotoxin precursor	O2	O2-WF	OK006A_TRINITY_DN11907_c0_g1_i1_Frame_F2	MGKLTILVLVAAVLLSTQVMVQGDADQPADRDAVPRDDNPGGTSGKLMNVLPKKILQRNYDGHAGNTEIMETQPSDSNSTQAENECPWHPWCG*	ATGGGGAAACTGACAATACTGGTTCTTGTTGCTGCTGTACTGTTGTCGACCCAGGTCATGGTTCAAGGTGATGCAGATCAACCTGCAGATCGTGATGCTGTGCCAAGAGACGATAACCCTGGTGGAACGAGTGGAAAGCTCATGAATGTTCTCCCAAAGAAAATACTGCAGAGAAACTATGATGGGCACGCAGGAAATACGGAGATTATGGAGACTCAACCCAGCGACTCGAACAGCACGCAAGCTGAGAATGAATGTCCGTGGCATCCGTGGTGTGGCTGA	2.55849	1	1
OK006_E_172	Conotoxin precursor	O3	O3-1	OK006A_TRINITY_DN398_c0_g1_i6_Frame_F3	MSGLGIMVLTLLLLVSMATSHQDGGEKQATQRDAFNFRRRRSLIRREITEACEEHCELEDKDCCGLTDGQPRCAQMCLG*	ATGTCAGGATTGGGAATCATGGTGCTAACCCTTCTACTTCTTGTGTCCATGGCAACCAGTCATCAGGATGGAGGAGAGAAGCAGGCGACGCAAAGGGACGCATTCAACTTCAGACGGAGAAGATCACTCATTCGGAGAGAAATAACTGAGGCGTGCGAGGAGCACTGTGAGCTGGAGGACAAGGACTGCTGCGGTTTAACAGACGGACAACCCAGATGTGCCCAGATGTGCCTCGGATAG	1782.26	1	1
OK006_E_173	Conotoxin precursor	O3	O3-1	OK006A_TRINITY_DN19244_c0_g1_i1_Frame_F2	MVLTLLLLVSMATSHQDGGGKLAMQRDAINVGRRRSLTQRAVTEACEESCEVSGKTCCGITNGQPTCAPVCLG*	ATGGTGCTAACCCTTCTACTTCTTGTGTCCATGGCAACCAGTCATCAGGATGGAGGAGGGAAGCTGGCGATGCAAAGGGACGCAATCAACGTAGGACGGAGAAGATCACTCACTCAGAGAGCAGTAACTGAGGCGTGCGAAGAGTCCTGTGAGGTGTCGGGAAAGACCTGCTGCGGCATAACAAATGGACAACCCACATGTGCCCCTGTATGCCTCGGATAG	3.87297	1	1
OK006_E_174	Conotoxin precursor	O3	O3-2	OK006A_TRINITY_DN398_c0_g1_i19_Frame_F2	MSGLGIMVLTLLLLVSMATSHTDRGVGLLMPRDGLQERTCTSDDDCGDLQCCPDTVDKPEGRCDSDCTIY*	ATGTCAGGATTGGGAATCATGGTGCTAACCCTTCTACTTCTTGTGTCCATGGCAACCAGTCATACGGACAGAGGAGTGGGACTGCTGATGCCACGCGACGGGCTCCAAGAGAGAACCTGCACTTCTGACGACGATTGTGGCGATCTGCAATGCTGCCCCGACACAGTGGATAAACCCGAAGGGCGCTGTGATAGTGATTGCACTATCTATTAG	50.5549	1	1
OK006_E_175	Conotoxin precursor	O3	O3-2	OK006A_TRINITY_DN39630_c0_g1_i1_Frame_R2	NKLQKRTCSSPSDCPTGQECCPDKVDEPEGFCVNECIITVYYTK*	AACAAGCTCCAAAAGAGAACCTGCAGTTCTCCTTCGGATTGCCCCACGGGTCAGGAATGCTGCCCCGACAAAGTGGATGAACCAGAGGGGTTCTGTGTTAACGAGTGCATTATCACTGTGTATTACACAAAGTGA	3.43079	1	0
OK006_E_176	Conotoxin precursor	O3	O3-2	OK006A_TRINITY_DN37466_c0_g1_i1_Frame_F3	GIMVLTLLLLVTMATGHEGNRVRRLMLQKKSDTGICKTDPECSTGQVCCSDSLQASDGYCTEANNCISY*	GGAATCATGGTGCTAACCCTTCTACTTCTTGTGACCATGGCAACCGGTCATGAGGGTAACAGAGTGAGACGGCTGATGCTTCAGAAGAAGTCTGACACTGGAATCTGCAAAACCGATCCAGAATGCTCCACTGGTCAGGTATGCTGCTCCGACAGCTTGCAGGCTTCAGATGGGTACTGTACTGAAGCAAACAATTGCATTTCATATTAG	1.10154	1	0
OK006_E_177	Conotoxin precursor	P	P-1a	OK006A_TRINITY_DN1573_c0_g2_i1_Frame_R2	MQLSLTRSALWMLLLLCALGNFVEVQPGQITRDVDNKQLTDNRRDLQSLMKPRTLLRSRGIPPRCGDGCVGGDDCSSQCPFCTHDNLCY*	ATGCAGCTGTCACTGACACGCTCAGCTCTTTGGATGTTGCTTCTGCTATGTGCCTTGGGCAACTTCGTTGAGGTCCAGCCAGGACAGATAACGAGAGATGTGGACAATAAGCAGCTCACGGACAACCGCCGTGACCTGCAATCGCTGATGAAGCCAAGGACTCTCTTGAGGTCACGTGGTATACCACCCAGGTGTGGAGATGGTTGCGTTGGTGGTGATGACTGCTCGTCCCAATGTCCGTTCTGTACGCACGACAATTTATGCTACTGA	312.033	1	1
OK006_E_178	Conotoxin precursor	P	P-1a	OK006A_TRINITY_DN1415_c1_g1_i3_Frame_R2	MHLSLAGSAVLMLLLLFALGVQSGQITRDADNGQLKANRRNLQSLWKKEGGTLVLCRSPCSAVRFCPPTCSYCEGTPQICRRSSSTG*	ATGCATCTGTCACTGGCAGGCTCAGCTGTTTTGATGTTGCTTCTGCTGTTTGCCTTGGGGGTCCAGTCAGGACAGATAACAAGGGATGCGGACAATGGACAGCTCAAGGCCAACCGCCGTAACCTGCAATCGCTGTGGAAAAAAGAGGGCGGTACTCTTGTCCTTTGTCGATCCCCTTGCTCAGCAGTTCGTTTTTGCCCGCCAACTTGTTCTTATTGCGAGGGTACTCCACAAATATGCCGAAGAAGCAGCAGCACCGGATGA	3.533	1	1
OK006_E_179	Conotoxin precursor	P	P-1a	OK006A_TRINITY_DN1415_c1_g1_i2_Frame_R2	MHLSLAGSAVLMLLLLFALGVQSGQITRDADNGQLKANRRNLQSLWKKESSSLVYCRSPCSGVPVCPPTCSYCEGSPKICRRTSSSG*	ATGCATCTGTCACTGGCAGGCTCAGCTGTTTTGATGTTGCTTCTGCTGTTTGCCTTGGGGGTCCAGTCAGGACAGATAACAAGGGATGCGGACAATGGACAGCTCAAGGCCAACCGCCGTAACCTGCAATCGCTGTGGAAAAAAGAGAGCAGTTCTCTTGTCTATTGTCGATCCCCTTGCTCAGGAGTTCCTGTTTGCCCGCCAACTTGTTCTTATTGCGAGGGTTCTCCAAAAATATGCCGAAGAACCAGCAGCAGCGGATGA	11.9006	1	1
OK006_E_180	Conotoxin precursor	P	P-1a	OK006A_TRINITY_DN1415_c1_g1_i1_Frame_R1	MHLSLAGSAVLMLLLLFALGVQSGQITRDADNGQLTDNRRNLQSMRKPKTLFKSLYKRSGCGEPCSEDADCPPGPSCPYCTQNLSKCM*	ATGCATCTGTCACTGGCAGGCTCAGCTGTTTTGATGTTGCTTCTGCTGTTTGCCTTGGGGGTCCAGTCAGGACAGATAACAAGGGATGCGGACAATGGACAGCTCACGGACAACCGCCGTAACCTGCAATCGATGAGGAAGCCAAAAACTCTCTTCAAGTCACTTTACAAACGAAGCGGTTGTGGAGAACCTTGCTCAGAAGATGCGGATTGCCCGCCCGGTCCCAGTTGTCCTTATTGTACGCAAAATCTATCAAAATGCATGTGA	2.81728	1	1
OK006_E_181	Conotoxin precursor	Q	Q-1a	OK006A_TRINITY_DN82_c0_g1_i3_Frame_R1	MHTLEMMLLVLLLLPQGTGEGDGRAVGGDRNPNKARSATTRLLQGPARRMDGRECTPCGPGLCCISGKSCETSTHHDTFGQPACV*	ATGCACACACTGGAAATGATGCTGCTCGTCCTGCTTCTGTTGCCCCAGGGAACCGGTGAGGGAGATGGACGAGCTGTGGGAGGGGACAGAAACCCCAATAAAGCACGCAGCGCCACCACACGCCTTCTGCAAGGACCGGCCAGGCGCATGGACGGACGCGAGTGCACACCCTGTGGCCCTGGTCTCTGCTGCATTTCTGGAAAAAGCTGCGAAACATCGACGCATCACGACACTTTTGGCCAGCCTGCGTGTGTATAA	2520.37	1	1
OK006_E_182	Conotoxin precursor	T	T-1	OK006A_TRINITY_DN5914_c0_g1_i6_Frame_R2	MRCLLVFIILLLLIPSAPSVDAQPMTKDDVPLSSLHDNAKRALQMFWNKRDCCPAKMFCCQW*	ATGCGCTGTCTCCTAGTCTTCATCATTCTTCTACTGCTGATTCCATCTGCACCCAGCGTTGATGCACAACCGATGACCAAAGATGATGTTCCCCTGTCATCTCTCCATGATAATGCAAAGCGAGCCCTACAAATGTTTTGGAACAAACGCGATTGCTGCCCAGCAAAAATGTTCTGCTGTCAATGGTGA	13.4988	1	1
OK006_E_183	Conotoxin precursor	T	T-1	OK006A_TRINITY_DN5914_c0_g1_i3_Frame_R2	MRCLPVFIILLLLIPSAPSVDAQPMTKDDVPLASLHDNAKRALQMFWNKRDCCPAKLLCCNP*	ATGCGCTGTCTCCCAGTCTTCATCATTCTTCTGCTGCTGATTCCATCTGCACCCAGCGTTGATGCCCAACCGATGACCAAAGATGATGTGCCCCTGGCATCTCTACATGATAATGCAAAGCGAGCCCTACAAATGTTTTGGAACAAACGCGATTGCTGCCCAGCAAAACTTTTATGCTGTAATCCATGA	11.5302	1	1
OK006_E_184	Conotoxin precursor	T	T-1	OK006A_TRINITY_DN25310_c0_g1_i1_Frame_R3	MRCLPVFVILLLLIASAPSVDARLKTKDMPLPSSHANIKRTLQMLRNKRCCPGWELCCEWDDVW*	ATGCGCTGCCTCCCAGTCTTCGTCATTCTTCTGCTGCTGATTGCATCTGCACCTAGCGTTGATGCCCGATTGAAGACCAAAGATATGCCCTTGCCATCTTCCCACGCTAACATAAAGCGAACCCTGCAAATGCTTCGGAACAAACGCTGCTGCCCAGGCTGGGAATTGTGCTGCGAGTGGGATGATGTGTGGTAA	4.45372	1	1
OK006_E_185	Conotoxin precursor	T	T-1	OK006A_TRINITY_DN5914_c0_g1_i5_Frame_R2	MRCLPVLIILLLLTASAPGVDVLPKTEDDVPLSSVYGNGKSILRGILRKGICCGVSF	ATGCGCTGTCTCCCAGTCTTGATCATTCTTCTGCTGCTGACTGCATCTGCACCTGGCGTTGATGTCCTACCGAAGACCGAAGATGATGTGCCCCTGTCATCTGTCTACGGTAATGGAAAGAGTATCCTACGAGGAATTCTGAGGAAAGGTATTTGCTGTGGCGTTTCGTTC	7.17691	0	0
OK006_E_186	Conotoxin precursor	T	T-2-WF	OK006A_TRINITY_DN6320_c0_g1_i3_Frame_F1	MLRLPIFILLVLVLSPAASVPVEPELQRDLTRQSPKDFGMRTKHLPRVPWLRCLFKPGGWGGVRRDQMC*	ATGCTCCGTCTTCCGATCTTCATCCTCCTTGTGCTGGTCCTGTCACCTGCAGCCAGTGTTCCTGTGGAACCAGAGCTGCAAAGAGATCTGACTCGGCAATCTCCTAAAGATTTTGGGATGAGAACTAAACACCTACCTCGTGTTCCTTGGCTCCGTTGCCTGTTTAAGCCCGGAGGCTGGGGCGGTGTTCGTCGGGACCAAATGTGTTAA	4.40615	1	1
OK006_E_187	Conotoxin precursor	T	T-2-WF	OK006A_TRINITY_DN6320_c0_g1_i8_Frame_F1	MLGLPIFILLLLVLSPAAGVPVDSELQRDLTRQSPKDFGMRTEHLPRKPWIDCSQSDDCVGDDNIEE*	ATGCTCGGTCTTCCGATCTTCATCCTCCTTCTGCTGGTCCTTTCACCTGCAGCTGGTGTTCCTGTGGACTCAGAGCTGCAAAGAGATCTGACTCGGCAATCTCCTAAAGATTTTGGGATGAGAACTGAACACCTACCTCGTAAACCTTGGATCGACTGCAGTCAATCAGACGACTGTGTAGGTGATGATAACATTGAAGAATGA	4.017	1	1
OK006_E_188	Conotoxin precursor	T	T-2-WF	OK006A_TRINITY_DN41402_c0_g1_i1_Frame_F1	MLCLPVFIILLLLVSPAATMPVDLEILKAPTKESRKDFEMRIELL	ATGCTCTGTCTCCCGGTCTTCATCATCCTTCTGCTGTTGGTTTCACCTGCAGCTACTATGCCTGTGGATTTAGAGATCCTGAAAGCTCCGACTAAGGAATCTCGTAAAGATTTTGAGATGAGAATTGAACTCCTA	4.11695	0	0
OK006_E_189	Conotoxin precursor	T	T-3	OK006A_TRINITY_DN19_c0_g2_i1_Frame_R2	MLCLPVFIILLLLASPAAPKSLETRIQNDLIRAGLTDADLKTEKGFLSGLLNVAGSVCCKVDTSCCSNQ*	ATGCTGTGTCTTCCGGTCTTCATCATCCTTCTTCTGTTGGCTTCACCTGCAGCTCCAAAGTCTTTGGAAACGAGAATCCAGAACGATTTGATTCGCGCAGGCCTTACAGATGCCGATCTGAAAACCGAAAAAGGCTTCCTTAGCGGCCTACTCAACGTGGCCGGCAGTGTGTGCTGCAAGGTTGATACCAGTTGCTGTTCTAACCAATAA	148.451	1	1
OK006_E_190	Conotoxin precursor	T	T-3	OK006A_TRINITY_DN3330_c0_g2_i1_Frame_R2	CLPVFIILLLLASPAAPKSFETKVQSDLTRTDGNMETEENLGEVRKVYCCLGVRDDWCCAGQIQI*	TGTCTTCCGGTCTTCATCATCCTTCTTCTGTTGGCTTCACCTGCAGCTCCAAAGTCTTTTGAAACGAAGGTCCAAAGTGACTTGACTCGTACAGATGGCAATATGGAAACCGAGGAAAACCTTGGTGAAGTCCGCAAAGTTTATTGCTGTCTCGGCGTTCGTGACGATTGGTGCTGTGCTGGCCAAATACAAATCTAA	13.2282	1	0
OK006_E_191	Conotoxin precursor	T	T-4	OK006A_TRINITY_DN6180_c0_g1_i2_Frame_R2	MRCLPVVVFLLLLLSAAAAPGVGSKTERLPGLTSSGDSDESLPFLNTICCWSGACCGG*	ATGCGTTGCCTCCCAGTCGTCGTCTTCCTTCTCCTGCTGCTTTCAGCGGCGGCTGCTCCTGGGGTCGGATCGAAAACCGAAAGGCTTCCAGGGCTCACATCATCCGGAGATTCCGACGAGAGTCTCCCCTTTTTGAATACAATTTGCTGTTGGTCCGGCGCTTGCTGTGGTGGCTAA	8.56284	1	1
OK006_E_192	Conotoxin precursor	T	T-4	OK006A_TRINITY_DN6180_c0_g1_i1_Frame_R1	MRCLPVVLLLLLLLSSAAALAVGSRTEGLQGLKSIDDFGDSAQSLPFLNTICCATGACCGG*	ATGCGTTGCCTCCCAGTCGTCCTCCTCCTTCTGCTGCTGCTTTCATCGGCTGCTGCTCTTGCGGTCGGATCGAGAACCGAAGGGCTTCAAGGGCTCAAATCAATCGATGATTTCGGCGATTCCGCTCAGAGTCTCCCCTTCCTTAATACGATTTGCTGTGCGACGGGGGCTTGCTGTGGCGGCTAA	8.19865	1	1
OK006_E_193	Conotoxin precursor	T	T-5	OK006A_TRINITY_DN25126_c0_g1_i1_Frame_F3	MNCLPVFLIALLLIAYSSQVAETSTDRAPPIDGPPRRQPTLDAKMDNMTEMLQSMHATMTKRLDEAPEICCSIFLSCCK*	ATGAATTGTCTGCCGGTCTTCCTGATCGCTCTGCTGCTGATTGCTTATTCATCCCAGGTTGCTGAGACCAGCACGGACAGGGCACCACCCATCGACGGCCCTCCTCGACGTCAACCGACACTGGACGCGAAGATGGACAACATGACGGAGATGTTACAGTCCATGCACGCTACAATGACCAAACGCCTTGACGAAGCTCCAGAAATATGTTGCTCCATTTTTCTATCTTGCTGTAAATAA	2.5998	1	1
OK006_E_194	Conotoxin precursor	Y	Y-1	OK006A_TRINITY_DN663_c0_g1_i1_Frame_F3	MQKAIVLILAILLLLPLSTAQDDEGSQENAAPRKRDTASQCGGTGTHCNEPEGQNCCTSLKCVNNCCWTTTEGCPS*	ATGCAGAAAGCAATAGTTCTTATTCTGGCCATCCTGCTTTTGTTGCCCCTGTCAACGGCTCAGGATGATGAAGGTAGCCAGGAAAATGCTGCACCGAGAAAAAGAGACACAGCCTCACAGTGTGGTGGAACCGGTACCCATTGCAATGAACCTGAAGGCCAGAATTGTTGCACCAGCCTGAAGTGCGTTAATAACTGTTGCTGGACAACCACCGAGGGTTGCCCATCATGA	1473.7	1	1
OK006_E_195	Conotoxin precursor	Y	Y-1	OK006A_TRINITY_DN7138_c0_g1_i1_Frame_R3	DDEGSQENAAPRNINIATRCRGTGVYCNDNEGKTCCTGLKCVDNCCWTSTNGCP*	GATGATGAAGGTAGCCAGGAAAATGCTGCACCGAGAAATATCAACATAGCCACACGGTGCCGTGGAACCGGTGTCTATTGCAATGACAATGAAGGCAAGACATGTTGCACCGGCCTGAAGTGCGTTGATAACTGTTGCTGGACATCCACCAACGGTTGCCCATAA	5.14166	1	0
OK006_E_196	Conotoxin precursor	Cerm02		OK006A_TRINITY_DN31281_c0_g1_i1_Frame_F3	MRFLLFLCIAVLLTSFRETEARLPDKAFRQRQSQYIQRIQRCPFCGFTCCS	ATGCGATTTCTTCTCTTTCTGTGCATTGCTGTGCTTCTGACTTCGTTCAGGGAGACAGAAGCGAGACTACCTGATAAAGCATTCAGGCAAAGGCAATCGCAGTACATCCAACGGATCCAACGTTGTCCTTTTTGTGGGTTCACGTGTTGCTCT	0.982275	0	0
OK006_E_197	Conotoxin precursor	Cerm03	Cerm03-1	OK006A_TRINITY_DN33103_c0_g1_i1_Frame_R1	GRTFRQRSPNSVDLQTRLIKRIGSCPPDCEKLCLFDGICQE*	GGAAGAACCTTTAGGCAGCGCAGTCCCAATTCTGTGGATCTGCAAACTCGTCTGATAAAAAGAATTGGCTCATGCCCGCCGGACTGCGAGAAGCTCTGCCTCTTTGACGGCATCTGCCAGGAATGA	2.43384	1	0
OK006_E_198	Conotoxin precursor	Cerm03	Cerm03-3	OK006A_TRINITY_DN776_c0_g1_i1_Frame_R2	MKMSATLIVLLVLGLSFTDGALHRTINGRGASGPHNRDAMGQLIPRGKCGDRCPSGICNVDGTCRD*	ATGAAGATGTCAGCAACGTTGATTGTTCTTCTGGTTCTGGGCCTGTCCTTCACTGATGGTGCCCTTCACCGTACCATCAACGGAAGGGGGGCATCTGGACCGCATAATCGGGATGCAATGGGTCAACTAATCCCGAGGGGGAAATGCGGTGACCGTTGCCCGAGTGGAATTTGCAATGTTGATGGGACTTGTAGGGACTAA	8.81641	1	1
OK006_E_199	Conotoxin precursor	Cerm03	Cerm03-3	OK006A_TRINITY_DN776_c0_g1_i2_Frame_R3	MKMSATLIVLLVLGLSFTDGALHRTINGRGASGPHNRDAMGQLIPRGKCSDRCPSGVCNVDMTCRD*	ATGAAGATGTCAGCAACGTTGATTGTTCTTCTGGTTCTGGGCCTGTCCTTCACTGATGGTGCCCTTCACCGTACCATCAACGGAAGGGGGGCATCTGGACCGCATAATCGGGATGCAATGGGTCAACTAATCCCGAGGGGGAAATGCAGTGACCGTTGCCCGAGTGGAGTTTGCAATGTTGATATGACTTGTAGGGACTAA	4.40821	1	1
OK006_E_200	Conotoxin precursor	Cerm03	Cerm03-5	OK006A_TRINITY_DN30_c0_g1_i19_Frame_F2	MKLTVMFIVFLMLTMPMASAEISRRTIDGGEASVLAGDRATNKNALLQQRLCPTSCSSCSNC*	ATGAAGCTCACAGTGATGTTCATTGTCTTTCTGATGCTGACCATGCCCATGGCCAGTGCTGAGATTAGTCGCCGCACCATCGACGGGGGAGAGGCCAGTGTGCTCGCAGGCGACAGGGCAACTAACAAAAACGCGTTGCTGCAGCAAAGACTATGCCCTACCTCGTGCTCGAGCTGCTCAAATTGCTAG	147.199	1	1
OK006_E_201	Conotoxin precursor	Cerm03	Cerm03-5	OK006A_TRINITY_DN30_c0_g1_i16_Frame_F2	MKLTVMFIVFLMLTMPMASAEISRRTIDGGEAGVLAGDRAANKMALLQERLCPPICNGCPGCY*	ATGAAGCTCACAGTGATGTTCATTGTCTTTCTGATGCTGACCATGCCCATGGCCAGTGCTGAGATTAGTCGCCGCACCATCGACGGGGGAGAGGCCGGTGTGCTCGCAGGCGACAGGGCAGCTAACAAAATGGCGCTCCTGCAGGAAAGACTATGCCCTCCCATTTGCAATGGCTGCCCAGGTTGCTACTGA	116.635	1	1
OK006_E_202	Conotoxin precursor	Cerm03	Cerm03-5	OK006A_TRINITY_DN30_c0_g1_i36_Frame_F2	MKLSVMFIVFLMLTMPMASAEISRRTIDGGEAGVLAGDRAANKMALLQERLCPPICNGCPGCY*	ATGAAGCTGTCAGTGATGTTCATTGTCTTTCTGATGCTGACCATGCCCATGGCCAGTGCTGAGATTAGTCGCCGCACCATCGACGGGGGAGAGGCCGGTGTGCTCGCAGGCGACAGGGCAGCTAACAAAATGGCGCTCCTGCAGGAAAGACTATGCCCTCCCATTTGCAATGGCTGCCCAGGTTGCTACTGA	0	1	1
OK006_E_203	Conotoxin precursor	Cerm03	Cerm03-5	OK006A_TRINITY_DN30_c0_g1_i1_Frame_F2	MKLSVMFIVFLMLTMPMTCAGISRSATNGGEADVRAHDKAANLMALLQERMCPPLCKPSCTNCG*	ATGAAGCTGTCAGTGATGTTCATTGTCTTTCTGATGCTGACCATGCCCATGACCTGTGCTGGCATTAGTCGCAGCGCTACCAACGGGGGAGAGGCCGATGTGCGAGCACATGACAAGGCAGCTAACCTAATGGCGCTCCTACAGGAAAGAATGTGCCCTCCCTTGTGCAAACCCAGCTGCACAAATTGCGGCTGA	111.421	1	1
OK006_E_204	Conotoxin precursor	Cerm03	Cerm03-6	OK006A_TRINITY_DN494_c0_g1_i3_Frame_F2	MQPSVMLVVLLMLTMPLINGVILKAASRRKAFVPYDRSNLDSHIGKRRCPAGCKSCPDPFTCVPAG*	ATGCAGCCATCAGTGATGCTTGTTGTTCTTCTGATGTTGACCATGCCATTGATCAATGGTGTCATCCTCAAGGCTGCCAGCAGGAGGAAAGCTTTTGTGCCATATGATCGCAGCAATTTGGATTCCCACATAGGAAAACGGCGTTGCCCTGCTGGCTGCAAATCCTGCCCTGATCCATTCACCTGTGTTCCAGCAGGATAA	6.12251	1	1
OK006_E_205	Conotoxin precursor	Cerm03	Cerm03-6	OK006A_TRINITY_DN494_c0_g1_i2_Frame_F1	MQPSVMLVVLLMLTMPFINGLMPRTATRRKDVAPNDRHAVDSQKLKRFCPNICISCPAPDVCIVSKR*	ATGCAGCCGTCGGTGATGCTTGTTGTTCTTCTGATGCTGACCATGCCCTTCATCAATGGTTTAATGCCCAGGACTGCCACCAGAAGGAAAGACGTTGCGCCAAATGATCGTCACGCGGTGGATTCCCAGAAATTAAAACGGTTTTGCCCTAACATATGCATTTCCTGCCCTGCTCCAGACGTCTGTATCGTATCAAAACGATGA	58.9128	1	1
OK006_E_206	Conotoxin precursor	Cerm03	Cerm03-6	OK006A_TRINITY_DN494_c0_g1_i1_Frame_F2	MQPSVMLVVLLMLTMPFINGLMPRTATRRKDVAPNDRHAVDSQKLKRFCPNPCQSCPSPGECVLPNSYAFILRLR*	ATGCAGCCGTCGGTGATGCTTGTTGTTCTTCTGATGCTGACCATGCCCTTCATCAATGGTTTAATGCCCAGGACTGCCACCAGAAGGAAAGACGTTGCGCCAAATGATCGTCACGCGGTGGATTCCCAGAAATTAAAACGGTTTTGCCCTAATCCATGCCAATCCTGCCCTTCTCCAGGCGAATGTGTCCTACCAAATTCATATGCTTTCATCCTGCGTTTACGGTGA	153.479	1	1
OK006_E_207	Conotoxin precursor	Cerm03	Cerm03-6	OK006A_TRINITY_DN494_c0_g1_i7_Frame_F1	MQPSVMLVVLLMLTMPFINGLMPRTATRRKDVAPNDRHAVDSQKLKRFCPNPCQSCPSPGECVRPYTGHTFFLHLR*	ATGCAGCCGTCGGTGATGCTTGTTGTTCTTCTGATGCTGACCATGCCCTTCATCAATGGTTTAATGCCCAGGACTGCCACCAGAAGGAAAGACGTTGCGCCAAATGATCGTCACGCGGTGGATTCCCAGAAATTAAAACGGTTTTGCCCTAATCCATGCCAATCCTGCCCTTCTCCAGGCGAATGTGTCCGACCATATACGGGACACACTTTCTTCCTGCATTTACGGTGA	54.3649	1	1
OK006_E_208	Conotoxin precursor	Cerm04		OK006A_TRINITY_DN11677_c0_g1_i1_Frame_F1	MKLSVVVIVLMLAMAFTHGSLLHNVGKALRRYNRHVRDTMADKRDKRTTCQSSKDCTPPLVCRRGVCDLFDDDMGG*	ATGAAACTGTCAGTGGTGGTCATTGTACTCATGCTGGCCATGGCTTTTACCCATGGTTCACTTCTTCACAATGTGGGAAAAGCCCTTAGGCGCTATAATCGCCATGTGAGGGACACGATGGCTGATAAGAGAGACAAACGTACTACTTGCCAGTCGTCTAAAGATTGCACGCCTCCACTCGTCTGCAGACGTGGTGTTTGCGATCTCTTTGACGATGATATGGGAGGCTAA	1.94466	1	1
OK006_E_209	Conotoxin precursor	Cerm06	Cerm06-1	OK006A_TRINITY_DN19783_c0_g2_i1_Frame_F2	MKVVVVLLAVLVVASTAPQKRFFIKDIQNWIQQLQAVFNKAKDKFNELTSGLGVHFDRIVDLLIDQIDSGMTEGACIKVCESSAGKILGNASSMAGMVCAPVCTAALAKLEEVAG*	ATGAAGGTTGTGGTTGTTCTGCTGGCTGTACTGGTGGTGGCCTCCACCGCGCCTCAGAAACGGTTCTTCATAAAAGACATCCAGAATTGGATCCAACAACTGCAGGCCGTTTTCAACAAAGCCAAGGACAAGTTTAACGAACTCACTTCCGGCCTGGGGGTCCACTTCGACAGGATTGTGGACCTGCTGATCGACCAGATTGATTCGGGCATGACGGAGGGAGCCTGCATAAAGGTGTGCGAGTCCAGCGCCGGCAAAATTCTTGGAAACGCTTCCTCCATGGCCGGTATGGTCTGCGCTCCAGTCTGCACAGCTGCCCTGGCTAAACTGGAGGAGGTCGCTGGTTAA	2.98514	1	1
OK006_E_210	Conotoxin precursor	Cerm06	Cerm06-2	OK006A_TRINITY_DN19783_c0_g1_i1_Frame_F2	MKVVVVLLASLVVVAYASPQKRFFIKDINNLLNQLKQTINNAKNQFDQITAGLGVNFDAVVDMLIDQIDSDTTQAACRTICVTGATEILQQAAPLANQVCEPACKAALAKMEEIAG*	ATGAAGGTTGTGGTTGTTCTGCTGGCCTCATTGGTCGTTGTGGCCTACGCCTCGCCACAGAAACGGTTCTTCATCAAAGACATCAACAACCTCCTGAACCAACTGAAACAAACGATCAACAACGCCAAGAATCAGTTTGATCAAATCACAGCCGGCCTGGGTGTCAACTTTGACGCAGTTGTGGACATGCTGATCGACCAGATCGATTCGGACACGACCCAGGCCGCCTGCAGAACCATCTGCGTGACCGGTGCCACTGAGATTCTACAACAGGCTGCGCCTCTTGCCAACCAAGTCTGTGAGCCAGCATGCAAAGCTGCCCTGGCTAAAATGGAAGAAATTGCCGGTTGA	0.618979	1	1
OK006_E_211	Conotoxin precursor	Cerm08		OK006A_TRINITY_DN2568_c0_g2_i1_Frame_R1	IGTSCTKDSAHSINAAGSTLYTCQEISAFRECVGSEAALNSDFSQMNCRCASGVYTISGTAVVCG*	ATTGGCACTAGCTGCACCAAGGACAGTGCCCACTCAATCAATGCAGCCGGCTCGACACTTTACACTTGCCAGGAGATCTCTGCCTTTCGTGAGTGTGTAGGGTCTGAAGCTGCGTTGAACTCCGATTTCAGCCAGATGAACTGCAGATGTGCAAGTGGTGTATACACCATAAGCGGAACTGCCGTTGTATGTGGCTAG	2.5359	1	0
OK006_E_212	Conotoxin precursor	Cerm08		OK006A_TRINITY_DN4103_c0_g1_i1_Frame_R2	CSATHSCTQDDAHKVEVNMEGGVQALYTCQQISDFDVCTATGAVMPADFSQLYCRCSNNKYTIENDDVVCG*	TGCTCAGCCACTCACTCCTGCACCCAGGACGATGCCCACAAAGTGGAAGTCAATATGGAAGGAGGCGTCCAGGCACTTTACACTTGCCAGCAGATCTCTGACTTTGACGTGTGTACTGCGACTGGTGCTGTGATGCCCGCCGACTTCAGCCAGTTGTACTGCAGATGTTCAAATAACAAGTACACCATAGAGAACGATGACGTTGTTTGTGGCTAG	4.53631	1	0
OK006_E_213	Conotoxin precursor	Cerm08		OK006A_TRINITY_DN490_c0_g1_i17_Frame_R1	MMLFMFAAIIFTMASTTVTADTCASAKSVCAWGGQGESCSCSAPHTCTQDDAHKVEVNMGEGVQALYTCKQISDFNVCTGTDAVMDAQFSQLNCRCSSNTYIIQNSAVVCG*	ATGATGCTGTTTATGTTCGCTGCCATCATCTTCACCATGGCCTCAACAACAGTCACTGCAGACACGTGTGCAAGTGCTAAGAGTGTGTGCGCATGGGGAGGGCAGGGTGAAAGTTGCAGCTGCTCAGCCCCTCACACCTGCACCCAGGACGATGCCCACAAAGTGGAAGTCAATATGGGAGAAGGCGTCCAGGCACTTTACACTTGCAAGCAGATCTCTGACTTTAACGTGTGTACTGGGACTGATGCTGTGATGGACGCCCAATTTAGCCAGTTGAACTGCAGATGTTCAAGTAACACGTACATCATACAGAACAGTGCCGTTGTTTGTGGCTAG	14263.4	1	1
OK006_E_214	Conotoxin precursor	Cerm08		OK006A_TRINITY_DN8682_c0_g1_i1_Frame_R1	TCGNEKKVCRDVVEGRMHELCDCPEIPSRGCIMDEDHKFVFAGTTLYTCQPVKDFPICNGSETTVYEPLNPQFNCRCESHVYKVVHYEVVCG*	ACGTGTGGAAATGAGAAGAAAGTGTGCCGAGACGTTGTCGAGGGTAGGATGCATGAACTCTGCGACTGCCCAGAGATCCCTAGTAGGGGCTGCATCATGGACGAAGACCACAAATTTGTTTTTGCCGGAACGACACTTTACACTTGCCAGCCGGTCAAGGACTTTCCCATTTGTAACGGGAGCGAAACTACTGTGTATGAACCCTTAAATCCGCAGTTCAACTGCAGATGTGAAAGTCACGTGTACAAAGTAGTACACTACGAAGTCGTGTGTGGCTAG	1.54431	1	0
OK006_E_215	Conotoxin precursor	Cerm10	Cerm10-1	OK006A_TRINITY_DN571_c0_g1_i1_Frame_R3	MKFSTFVMVLMAAVLLTSILETEARRSFRARLKAKRFDQDDYLERVEEICEGTNRDCRGQPDGTTCCRNSHCSQGVCYLNF*	ATGAAATTCTCAACGTTCGTGATGGTCCTGATGGCTGCTGTTCTCCTGACTAGCATCTTGGAGACTGAGGCCAGGAGATCGTTCAGAGCTAGACTGAAAGCAAAAAGATTTGATCAGGACGATTATCTGGAAAGGGTGGAAGAGATTTGTGAAGGAACGAATAGAGACTGCCGAGGGCAGCCGGATGGAACTACCTGCTGTCGAAATAGCCACTGCTCCCAAGGTGTATGCTACCTCAACTTCTAA	14.9318	1	1
OK006_E_216	Conotoxin precursor	Cerm10	Cerm10-1	OK006A_TRINITY_DN571_c0_g1_i2_Frame_R3	MKFSTFVMVLMAAVLLTSILETEARRSFRARLKAKRFDQDDYLERVEEICEGTNRDCRGQPDGTTCCRNSHCSQGVCYIHI*	ATGAAATTCTCAACGTTCGTGATGGTCCTGATGGCTGCTGTTCTCCTGACTAGCATCTTGGAGACTGAGGCCAGGAGATCGTTCAGAGCTAGACTGAAAGCAAAAAGATTTGATCAGGACGATTATCTGGAAAGGGTGGAAGAGATTTGTGAAGGAACGAATAGAGACTGCCGAGGGCAGCCGGATGGAACTACCTGCTGTCGAAATAGCCACTGCTCCCAAGGTGTATGCTACATCCACATCTAA	36.3557	1	1
OK006_E_217	Conotoxin precursor	Cerm10	Cerm10-1	OK006A_TRINITY_DN571_c0_g1_i3_Frame_R3	MKFSTFVMVLMAAVLLTSILETEARRSFRARLKAKRFDPDDYLEKVEEACEGTNRNCVGQPFDAPCCGDGHCFLHVCHIDF*	ATGAAATTCTCAACGTTCGTGATGGTCCTGATGGCTGCTGTTCTCCTGACTAGCATCTTGGAGACTGAGGCCAGGAGATCGTTCAGAGCTAGACTGAAAGCAAAAAGATTTGATCCGGACGATTATCTGGAAAAGGTGGAAGAGGCGTGTGAAGGAACGAATAGAAACTGCGTAGGGCAGCCGTTTGATGCTCCCTGCTGTGGAGATGGCCACTGCTTCCTACATGTATGCCACATCGACTTCTAA	13.6767	1	1
OK006_E_218	Conotoxin precursor	Cerm10	Cerm10-2	OK006A_TRINITY_DN114_c0_g1_i4_Frame_R2	MKSTLFLTVLMAAVFLTFFAETATTSIFKATEKRTDSEEFPCAGTFADCRDQPDETICCDTGACYGEVCYY*	ATGAAGTCCACACTCTTCCTGACGGTCCTGATGGCCGCCGTTTTCCTGACTTTCTTCGCAGAGACTGCTACAACGTCAATCTTCAAGGCAACAGAAAAAAGAACCGATTCAGAAGAATTCCCGTGTGCGGGCACGTTCGCGGACTGCCGGGACCAGCCTGATGAAACAATCTGCTGCGACACTGGGGCATGCTACGGGGAAGTATGCTATTATTGA	117.822	1	1
OK006_E_219	Conotoxin precursor	Cerm10	Cerm10-2	OK006A_TRINITY_DN114_c0_g1_i1_Frame_R1	MKSTLFLMVLMAAVFLTFFTETATTSIFKATEKRTDSEEFPCAGTFADCRDQPDETICCDTGACYGEVCYY*	ATGAAGTCCACACTCTTCCTGATGGTCCTGATGGCTGCTGTTTTCCTGACGTTCTTCACAGAGACTGCTACAACGTCAATCTTCAAGGCAACAGAAAAAAGAACCGATTCAGAAGAATTCCCGTGTGCGGGCACGTTCGCGGACTGCCGGGACCAGCCTGATGAAACAATCTGCTGCGACACTGGGGCATGCTACGGGGAAGTATGCTATTATTGA	79.9141	1	1
OK006_E_220	Conotoxin precursor	Cerm11	Cerm11-1	OK006A_TRINITY_DN9847_c0_g1_i1_Frame_R1	MEFRRLVTVALLLALVLSIDSTPADQTETGRVSLREGNEFPCNSDQCACLPKEGSSTSYQCQSTSASTDDCFNDECITEDEW*	ATGGAATTTCGCCGGCTTGTGACTGTGGCGCTGCTTCTGGCTTTGGTCCTGAGTATTGATTCAACGCCTGCCGACCAAACGGAAACTGGAAGGGTTTCCCTGCGCGAGGGTAACGAATTTCCTTGCAATTCAGACCAATGTGCATGTCTGCCGAAGGAAGGATCATCGACTTCTTACCAGTGCCAATCGACCTCAGCCAGTACAGATGATTGTTTCAATGATGAGTGCATAACGGAAGACGAATGGTGA	6.88261	1	1
OK006_E_221	Conotoxin precursor	Cerm11	Cerm11-1	OK006A_TRINITY_DN23484_c0_g1_i1_Frame_F1	MEFCRVVAVGLIVTLVMTIDSVPADQTETGRVSLREDDRFPCASDQCACLPEEGSTTSWVCQSIQASRDDCVNDECITEDEWGGRR*	ATGGAATTTTGCCGGGTTGTGGCTGTTGGGCTGATTGTGACTTTGGTCATGACTATTGACTCAGTGCCTGCCGACCAAACGGAAACTGGAAGAGTTTCCCTGCGCGAGGATGACAGGTTTCCTTGCGCTTCAGACCAATGTGCATGTCTGCCAGAGGAGGGATCAACGACCTCTTGGGTGTGCCAGTCGATCCAAGCCAGTAGAGATGACTGTGTCAATGATGAATGCATCACGGAAGATGAATGGGGAGGACGCCGCTAG	1.49466	1	1
OK006_E_222	Conotoxin precursor	Cerm11	Cerm11-2	OK006A_TRINITY_DN11587_c0_g1_i1_Frame_F1	MDIRWLVTAALLLSFMMSIDSVISGRMETGRFSPRETSDFPCNGDQCVCWKSKEDYQCQSVDDSANNCVNQNCTRQSGWG*	ATGGACATTCGCTGGCTTGTGACTGCTGCGCTGCTTCTGTCTTTCATGATGAGTATTGATTCAGTGATTTCCGGTCGAATGGAAACTGGAAGATTTTCCCCACGCGAGACGTCCGATTTTCCTTGCAATGGAGACCAATGTGTATGTTGGAAAAGCAAGGAAGATTACCAGTGCCAGTCGGTCGACGACAGTGCAAATAATTGTGTGAATCAAAATTGTACAAGGCAAAGCGGATGGGGATGA	4.58398	1	1
OK006_E_223	Conotoxin precursor	Cver02		OK006A_TRINITY_DN398_c0_g1_i2_Frame_F2	MPGRMIVLLAVLLLADLSTSLQDHGEKLLRGKVKVEERESCRTNHNDDCPSGQYCCGLPQESHGVCGRRC*	ATGCCAGGAAGGATGATCGTGCTGCTTGCTGTTCTGCTCCTCGCGGACCTGTCCACCAGTCTGCAGGACCATGGAGAGAAACTTCTGAGGGGAAAGGTCAAGGTCGAAGAGAGGGAAAGCTGTAGAACCAACCACAATGATGACTGCCCATCGGGACAATATTGCTGCGGACTCCCACAGGAGTCTCACGGAGTTTGTGGTAGAAGGTGCTAA	6.38824	1	1
OK006_E_224	Conotoxin precursor	Cver04		OK006A_TRINITY_DN18378_c0_g1_i1_Frame_F1	MDMKMTFSGFVLAVLVTTVVGSSVRGGEVSGNLNHCWLPAYRQCLLECWILNFDNCYARCTTVLTEEFGADTNTYDCTIYKVCYYRCYVLGKPEAHCWEETAGSVTGKVTDLVFC*	ATGGACATGAAGATGACGTTCAGCGGGTTTGTGCTGGCTGTCTTGGTAACCACTGTCGTTGGCTCGTCAGTTCGTGGCGGCGAGGTTTCGGGTAACTTGAACCATTGCTGGCTGCCTGCGTATAGGCAGTGTCTGTTGGAATGTTGGATTTTGAATTTCGACAATTGCTATGCACGCTGCACAACAGTGCTGACGGAGGAATTCGGAGCAGACACCAATACATATGATTGCACAATATACAAGGTTTGCTATTACCGGTGTTACGTGTTGGGGAAACCTGAAGCCCATTGCTGGGAAGAAACCGCTGGATCAGTGACGGGCAAAGTGACCGATCTGGTCTTTTGCTGA	1.49257	1	1
OK006_E_225	Conotoxin precursor	Cver06		OK006A_TRINITY_DN3164_c0_g1_i3_Frame_R3	MLSVFTVVWVLTTVMMMTDVTFQSTCNTDNLELCSEATRLCGKGTSWDQCIGLCKCRNEQACTTDADHTVQVIPAPFQSNKTYYTCRSLSTMGACQSNNEAMSGNSEDTYKILCKCDETYQPHSLNNRTFVCR*	ATGCTGTCTGTATTCACGGTGGTTTGGGTTTTGACAACGGTAATGATGATGACTGACGTCACATTTCAGTCGACGTGCAACACTGACAACCTGGAGCTGTGCTCAGAGGCCACCCGCCTGTGTGGAAAAGGAACCTCTTGGGACCAGTGCATTGGACTGTGCAAGTGTCGAAACGAGCAGGCCTGCACCACTGACGCTGACCACACGGTCCAAGTCATCCCTGCACCGTTTCAATCGAACAAGACGTATTACACGTGCAGGAGTCTTTCCACGATGGGTGCTTGTCAATCAAACAACGAAGCTATGAGTGGGAACAGTGAGGACACGTATAAGATTCTGTGTAAATGTGACGAAACTTACCAGCCACATTCCTTGAATAATCGGACATTCGTCTGTCGG…	2.72886	1	1
OK006_E_226	Conotoxin precursor	Cver06		OK006A_TRINITY_DN3164_c0_g1_i1_Frame_R3	MLSVFTVVWVLTTVMMMTDVTFQSTCNTDNLELCSEATRLCGKGTSWDQCIGLCKCRNEQACTTDADHTVQVIPAPFQSNKTYYTCRSLSTMDACQSNERAMSGNSENKYKILCKCDKTYQPRSLNDRKFVCQ*	ATGCTGTCTGTATTCACGGTGGTTTGGGTTTTGACAACGGTAATGATGATGACTGACGTCACATTTCAGTCGACGTGCAACACTGACAACCTGGAGCTGTGCTCAGAGGCCACCCGCCTGTGTGGAAAAGGAACCTCTTGGGACCAGTGCATTGGACTGTGCAAGTGTCGAAACGAGCAGGCCTGCACCACTGACGCTGACCACACGGTCCAAGTCATCCCTGCACCGTTTCAATCGAACAAGACGTATTACACGTGCAGGAGTCTTTCCACGATGGATGCTTGTCAATCAAACGAGAGAGCTATGAGTGGGAACAGTGAGAACAAGTATAAGATTCTGTGTAAATGTGACAAAACTTACCAGCCACGTTCCTTGAATGATCGGAAATTCGTCTGTCAG…	2.93877	1	1
OK006_E_227	Conotoxin precursor	Ggeo01		OK006A_TRINITY_DN148_c0_g3_i2_Frame_R1	MSRLFLILLAISVITVWVDAFQADDSGLDKKSRPLSRAARDHANSDFFGKLQAAELDRHRRFLIAAPFYSPNANHYHKMQLFEPHLKKADSKSL*	ATGTCACGCCTCTTCCTCATTCTTCTGGCCATTTCTGTCATCACTGTGTGGGTCGATGCATTCCAGGCTGATGACAGTGGCCTTGACAAGAAGTCCAGACCATTGTCACGTGCCGCCAGGGACCACGCCAACTCTGACTTCTTCGGGAAACTTCAGGCCGCTGAGCTTGACAGACATCGACGTTTTCTGATCGCCGCTCCATTTTACAGCCCCAACGCCAACCACTACCACAAAATGCAACTTTTCGAACCACATCTCAAAAAAGCCGATTCTAAAAGTCTGTAA	32636.4	1	1
OK006_E_228	Conotoxin precursor	Ggeo01		OK006A_TRINITY_DN2392_c0_g2_i1_Frame_R3	MSRLFLVLLAISVLTLHTDSIQDHDGGADKSSGPVARAARDKASPALFRKFRARANVRSRRIGRAVEDFPGAEEEEEDEELDDGRKALLAKKIKNKFFHLYHLHRL*	ATGTCACGCCTGTTCCTGGTTCTTCTGGCGATCTCTGTCCTCACTCTCCACACTGACTCCATCCAGGACCATGACGGTGGTGCGGACAAGAGCTCCGGACCTGTGGCACGTGCTGCCAGAGACAAGGCCTCCCCTGCCCTCTTCCGCAAGTTCCGGGCCCGCGCCAACGTCCGCAGCCGGAGAATCGGACGCGCTGTTGAAGACTTTCCCGGCGCTGAGGAGGAGGAAGAGGATGAGGAGTTGGACGATGGAAGGAAAGCTCTACTGGCCAAGAAGATTAAGAATAAGTTTTTCCACCTCTACCACCTTCATAGGCTGTAA	77.301	1	1
OK006_E_229	Conotoxin precursor	Ggeo01		OK006A_TRINITY_DN4931_c0_g1_i4_Frame_F2	MSRLFLVLLVISVITLHTDSSQGTDGSTDVGSGPSHGYQRKLRVRIFRRTSFDDKTGSEQEEEEEP*	ATGTCACGCCTCTTCCTGGTTCTTCTAGTGATTTCTGTTATCACTCTCCACACTGACTCATCCCAGGGTACTGACGGTAGCACTGACGTGGGGTCCGGGCCCAGTCATGGTTATCAGCGCAAACTCCGGGTCCGCATCTTCCGCAGAACGAGCTTTGATGACAAGACTGGTTCAGAGCAGGAAGAGGAGGAAGAGCCTTAA	27.6737	1	1
OK006_E_230	Conotoxin precursor	Ggeo01		OK006A_TRINITY_DN2903_c0_g2_i1_Frame_F3	MSRLFLLLVAISVITVWLDASQTDDSSTEKRSRSMPDVDFNLQFDKIGDSSDFGKGFPKRK*	ATGTCACGCCTCTTCCTCCTTCTTGTGGCGATTTCTGTCATCACTGTGTGGCTTGATGCATCCCAGACTGATGACAGTAGCACTGAGAAGAGGTCCAGGTCAATGCCAGATGTTGACTTCAATCTACAGTTTGACAAAATTGGGGACTCCAGTGACTTTGGCAAAGGATTCCCGAAGAGAAAGTAA	17.5685	1	1
OK006_E_231	Conotoxin precursor	Ggeo01		OK006A_TRINITY_DN41175_c0_g1_i1_Frame_R2	MSRLFLILLVISVITMCANTSQDGNVGIDKRSGQLSRAIEDNANTGFSWKRLAITKFRRSGRSLSDHTIE	ATGTCACGCCTGTTCCTGATTCTTTTGGTGATTTCTGTCATCACTATGTGCGCTAATACCTCCCAGGATGGTAATGTTGGCATTGACAAGAGGTCCGGACAGTTGTCACGTGCTATCGAGGACAACGCCAACACTGGTTTCTCCTGGAAACGCCTAGCTATCACCAAATTTCGCAGGTCTGGACGTAGCCTGAGCGACCATACTATAGAG	1.54215	0	0
OK006_E_232	Conotoxin precursor	Ggeo01		OK006A_TRINITY_DN10394_c0_g1_i1_Frame_R1	MPRLFLILLAISVITLKADASRADDGGPDNWSRLLSRAAGDNAYSGFSRKLQATIKRRDAMDDPVIFPTEPPGRSINSQQNM*	ATGCCACGCCTCTTCCTGATTCTTCTGGCGATTTCTGTCATCACTCTGAAGGCTGATGCGTCCCGGGCTGATGACGGGGGTCCTGACAATTGGTCCAGGCTGTTGTCACGTGCTGCCGGGGACAACGCCTACTCTGGCTTCTCCAGGAAACTTCAAGCCACCATCAAGCGACGAGACGCGATGGACGACCCAGTAATCTTTCCCACAGAGCCCCCCGGACGATCCATAAACTCCCAACAGAATATGTAG	2.70025	1	1
OK006_E_233	Conotoxin precursor	Ggeo01		OK006A_TRINITY_DN11358_c0_g1_i1_Frame_R2	MSRLFLILLVISVITPWPYAWQGYDGTMDGRSRNHARADFYRKRRAAASFRR	ATGTCACGCCTGTTCTTGATTCTTCTAGTGATTTCTGTCATCACTCCATGGCCTTATGCCTGGCAGGGCTATGATGGTACCATGGACGGGAGGTCCAGGAACCACGCCCGCGCTGACTTCTACAGGAAACGTCGGGCCGCCGCCAGCTTTCGCCGA	2.77923	0	0
OK006_E_234	Conotoxin precursor	Ggeo03	Ggeo03-2	OK006A_TRINITY_DN189_c0_g3_i1_Frame_R2	MKMYLCLAIVLLLASAIAGSPLDKTETARNWRPKEKYEQQCDECMCSNLNVGICITPSNICSGPCESGCDDNQCKCNYFKDGICTSKSACNDTVC*	ATGAAAATGTACCTGTGTCTTGCTATTGTTCTGCTCCTGGCTTCTGCCATAGCTGGTTCACCACTTGATAAAACGGAAACTGCAAGAAATTGGAGACCCAAAGAAAAATATGAACAGCAGTGTGACGAATGCATGTGCAGCAATTTAAATGTGGGCATATGCATAACACCGTCCAACATTTGCAGTGGTCCTTGCGAAAGCGGATGTGACGACAATCAATGCAAGTGTAATTATTTCAAAGACGGAATATGCACATCAAAGTCCGCTTGCAATGATACAGTGTGTTGA	9799.51	1	1
OK006_E_235	Conotoxin precursor	Ggeo03	Ggeo03-2	OK006A_TRINITY_DN189_c0_g4_i1_Frame_R3	TETARNWGREERDEAQCPECRCTNLKEGLCVDSTECSGSCKGGCENYNCKCDYFQQGRCVLKSNCIDTVC*	ACGGAAACTGCAAGAAATTGGGGACGCGAAGAAAGAGATGAAGCCCAGTGTCCTGAATGCAGGTGCACCAACTTAAAAGAGGGCTTATGTGTAGACAGCACAGAATGCAGTGGTTCTTGCAAAGGCGGATGTGAAAACTATAATTGCAAGTGTGATTATTTCCAACAAGGAAGATGCGTATTAAAGTCCAATTGCATAGATACAGTATGTTGA	24.6307	1	0
OK006_E_236	Conotoxin precursor	Ggeo03	Ggeo03-2	OK006A_TRINITY_DN6278_c0_g1_i1_Frame_R3	RNWGREVRDEAQCPECRCNNLKEGLCVDRTECSGTCKDGCENHNCKCDYFQQGRCVPKSNCKDKRC*	AGAAATTGGGGACGCGAAGTAAGAGATGAAGCCCAGTGTCCTGAATGCAGGTGCAACAACTTAAAAGAGGGCTTATGTGTAGACCGCACAGAATGCAGTGGTACTTGCAAAGACGGATGTGAAAACCATAATTGCAAGTGTGATTATTTCCAACAAGGAAGATGCGTACCAAAGTCCAATTGCAAAGATAAAAGATGTTGA	5.14291	1	0
OK006_E_237	Conotoxin precursor	Pmag02	SF-mi2 01	OK006A_TRINITY_DN867_c0_g2_i1_Frame_R1	MKAVAVFMIVSLAVAYGQFFCPESENDPLNCLETQPNSATCMQSSDDNSYSYVCGYCGKKKETCFGNKAAVQDYYCQRNGIANTCGGAAQ*	ATGAAGGCTGTGGCTGTGTTTATGATTGTCTCCCTTGCTGTGGCTTACGGCCAGTTCTTCTGCCCGGAGAGTGAGAATGACCCCCTGAACTGCCTGGAGACCCAGCCCAACTCCGCCACCTGCATGCAGTCCAGCGACGATAACTCCTACTCCTATGTGTGCGGCTACTGCGGCAAGAAGAAGGAGACTTGCTTCGGGAACAAAGCGGCGGTACAGGATTACTACTGCCAGAGAAACGGCATCGCCAACACCTGTGGCGGCGCCGCTCAGTGA	30.7615	1	1
OK006_E_238	Conotoxin precursor	Pmag02	SF-mi2 01	OK006A_TRINITY_DN867_c0_g1_i4_Frame_R1	MKTVAVFLVVALAVAYGQFFCPDSEDDPLNCLETQATSATCMKSTEDETYSYVCGYCGKKKESCFGKKVPTSDYNCQIHKIPNHCGGPVM*	ATGAAGACTGTGGCTGTGTTCCTGGTTGTCGCCCTTGCTGTGGCTTATGGGCAGTTCTTCTGCCCGGATAGCGAAGACGATCCCCTGAACTGCCTGGAGACTCAGGCGACCAGTGCCACGTGCATGAAGTCAACGGAGGATGAGACCTACTCCTATGTGTGCGGCTACTGCGGCAAGAAAAAGGAGTCTTGTTTCGGCAAGAAAGTGCCAACGTCTGACTACAACTGCCAGATTCACAAGATCCCGAACCACTGCGGCGGCCCTGTTATGTGA	11968.6	1	1
OK006_E_239	Conotoxin precursor	Rimp01	SF-mi2 01	OK006A_TRINITY_DN46_c8_g1_i3_Frame_R2	MARLLSMLLCIAVAVVLAAGIQYSAESPMQQCSTHAVSKMEVYSNNQGKYELLDSYCSCDSGEAYFEAQDTTTSSSTVSSYKIYVCGMPTESCTGGTLPVTDSDNGPRRMQCTCGQYKYLVSASLGWHVRCK*	ATGGCGCGCTTGCTGTCCATGCTACTATGCATCGCCGTGGCAGTGGTCCTGGCTGCAGGCATACAATATTCAGCTGAAAGTCCGATGCAGCAGTGCAGCACGCACGCTGTCAGTAAAATGGAGGTGTACTCGAACAACCAGGGCAAATATGAACTCCTTGACTCGTACTGCTCCTGTGACAGCGGCGAGGCCTACTTTGAGGCCCAGGACACCACCACAAGCTCCTCCACGGTGTCATCATACAAAATCTACGTGTGCGGTATGCCAACAGAGTCGTGTACGGGAGGAACCTTACCAGTGACTGATTCGGACAATGGGCCACGAAGGATGCAATGCACATGCGGACAGTACAAGTATTTAGTCTCCGCCAGTTTGGGATGGCATGTTCGTTGCAAGTAG	8875.48	1	1
OK006_E_240	Conotoxin precursor	Rimp01	SF-mi2 01	OK006A_TRINITY_DN18734_c0_g1_i1_Frame_F2	ISKTELYSNRYGRYVLHYSYCSCASGEVYFEAQDTTTSYTTVLYKIYACGAPTHSCSGETLPVTDPDDRPRKMQCTCEQYKYLLYPRLGWLVRCK*	ATCAGTAAAACGGAGCTGTACTCGAACCGCTACGGCAGATATGTACTCCACTACTCGTACTGCTCCTGTGCCAGCGGCGAGGTCTACTTTGAGGCCCAGGACACCACCACAAGCTACACCACGGTGTTATACAAAATCTACGCGTGCGGTGCGCCAACACATTCGTGTTCGGGAGAAACTTTACCTGTGACTGATCCGGACGATAGGCCACGAAAGATGCAATGCACATGCGAACAGTACAAGTATCTTCTTTACCCCCGTTTGGGATGGCTTGTTCGTTGCAAGTAG	1.45097	1	0
OK006_E_241	Conotoxin precursor	SF-mi1		OK006A_TRINITY_DN12_c5_g1_i3_Frame_F3	MSKTGIVLVVLYLLSSPVNLQQNEDNKAFSKMRSPTQIHWPDCNTCSANDDGRCVGTCCDGGVCEGGNLGCGCLYPGSTRG*	ATGTCGAAAACAGGAATTGTGCTGGTTGTCCTGTACCTTCTTTCTTCTCCAGTAAACCTTCAGCAGAATGAAGATAACAAGGCTTTCTCCAAGATGAGGAGCCCTACACAGATCCATTGGCCGGACTGCAACACCTGTTCTGCTAATGACGATGGACGATGCGTGGGGACTTGCTGCGACGGCGGCGTCTGCGAGGGAGGCAACCTCGGATGTGGATGTCTGTATCCTGGCAGTACCAGAGGCTAA	52.4791	1	1
OK006_E_242	Conotoxin precursor	SF-mi1		OK006A_TRINITY_DN20508_c1_g1_i1_Frame_F2	LYLLSSPVNLQQNEDNKAFSKIRSPTQIREQPECDDCSANDGGHCVGTCCPGGVCEGGHLGCGCQYPGTTRG*	CTGTACCTTCTTTCTTCTCCAGTAAACCTTCAGCAGAATGAAGATAACAAGGCTTTCTCCAAGATCAGGAGCCCTACACAGATCCGTGAACAGCCGGAATGCGACGACTGCTCTGCTAATGACGGTGGACACTGCGTGGGGACTTGCTGCCCCGGCGGCGTCTGCGAGGGAGGCCACCTCGGATGTGGATGTCAGTATCCTGGCACTACCAGAGGCTAA	1.59739	1	0
OK006_E_243	Conotoxin precursor	SF-mi1		OK006A_TRINITY_DN20508_c0_g1_i1_Frame_F1	MSKMGIVLVVLYLLSSPVNLQQNEDDKAFSEIESPTLTRVLRCQKCKPNSSGFCEGTCCKAAFTCQAGHWGCSCVARTHDYGLTTSG*	ATGTCGAAAATGGGAATTGTGCTGGTTGTCCTGTACCTTCTTTCTTCTCCGGTAAACCTTCAGCAGAATGAAGATGACAAGGCTTTCTCCGAGATCGAGAGCCCTACACTGACGCGTGTTCTGAGATGCCAAAAATGCAAACCCAATTCTTCCGGATTTTGCGAGGGGACCTGCTGTAAGGCTGCCTTCACCTGCCAGGCAGGCCACTGGGGATGTTCGTGTGTCGCCAGGACACACGATTACGGATTAACAACGTCAGGCTAG	2.80037	1	1
OK006_E_244	Conotoxin precursor	SF-mi2	SF-mi2 01	OK006A_TRINITY_DN3622_c0_g2_i2_Frame_F3	MRFYLLLTVTLLLTLSTGGDAGPRRANGLPKHFVLRTCTGNCRLCGAICCCEPKVCRNNQCIDDK*	ATGAGATTTTACCTGCTGCTGACCGTCACGCTGCTTCTGACATTGTCCACTGGTGGTGATGCTGGACCGAGGCGTGCTAATGGCTTACCAAAACATTTCGTACTTCGTACTTGCACAGGGAACTGTCGTCTATGTGGCGCCATATGTTGTTGTGAACCCAAGGTTTGCAGAAATAACCAATGCATAGATGACAAGTGA	347790	1	1
OK006_E_245	Conotoxin precursor	SF-mi2	SF-mi2 01	OK006A_TRINITY_DN4037_c1_g1_i3_Frame_F2	MRFYLLLTVTLLLTLTTGGDAGPRRANGLPKQFVLRTCTGNCRLCGAICCCEPKVCRNNQCIDDK*	ATGAGATTTTACCTGCTGCTGACCGTCACGCTGCTTCTGACATTGACCACTGGTGGTGATGCTGGACCGAGGCGTGCTAATGGCTTACCAAAACAGTTCGTACTTCGTACTTGCACAGGGAACTGTCGTCTATGTGGCGCCATATGTTGTTGTGAACCCAAGGTTTGCAGAAATAACCAATGCATAGATGACAAGTGA	62.4024	1	1
OK006_E_246	Conotoxin precursor	SF-mi2	SF-mi2 01	OK006A_TRINITY_DN12619_c2_g1_i1_Frame_R2	MRFYLLLTVTLLLTLSTGGDAGPRRANGLPEHFVLRTCTGNCRQCGAICCCEP	ATGAGATTTTACCTGCTGCTGACCGTCACGCTGCTTCTGACATTGTCCACTGGTGGTGATGCAGGACCGAGGCGTGCTAATGGCTTACCAGAACATTTCGTACTTCGTACTTGCACAGGGAACTGTCGTCAATGTGGCGCCATATGTTGTTGTGAACCC	27.0093	0	0
OK006_E_247	Conotoxin precursor	SF-mi2	SF-mi2 01	OK006A_TRINITY_DN15741_c0_g1_i1_Frame_R2	MRFYLLLTVTLLLTLSTGGDAGPRRANGLPKHFVLRNCTGNCRLCGAICCCEPKVCRNKQCIDEK*	ATGAGATTTTACCTGCTGCTGACCGTCACGCTGCTTCTGACATTGTCCACTGGTGGTGATGCTGGACCGAGGCGTGCTAATGGTTTACCAAAACATTTCGTACTTCGTAATTGCACAGGGAACTGTCGTCTATGTGGCGCCATATGTTGTTGTGAACCCAAGGTTTGCAGAAATAAACAATGCATAGATGAAAAGTGA	51.3777	1	1
OK006_E_248	Conotoxin precursor	SF-mi2	SF-mi2 01	OK006A_TRINITY_DN39745_c0_g1_i1_Frame_R2	MRFYLLLTVTLLMTLSTGGDAEPRRANGLPKHFVLRTCTGN	ATGAGATTTTACCTGCTGCTGACCGTCACGCTGCTTATGACATTGTCCACTGGTGGTGATGCTGAACCGAGGCGTGCTAATGGCTTACCAAAACATTTCGTACTTCGTACTTGCACAGGGAAC	35.3498	0	0
OK006_E_249	Conotoxin precursor	SF-mi2	SF-mi2 01	OK006A_TRINITY_DN4037_c1_g1_i1_Frame_F2	MRFYLLLTVTLLLTLSTRGDAGARRANGLPKQFVLRTCTGNCRLCGAICCCEPKVCRNNQCIDDK*	ATGAGATTTTACCTGCTGCTGACCGTCACGCTTCTTCTGACATTGTCCACTAGAGGTGATGCTGGAGCGAGGCGTGCTAATGGCTTACCAAAACAGTTCGTACTTCGTACTTGCACAGGGAACTGTCGTCTATGTGGCGCCATATGTTGTTGTGAACCCAAGGTTTGCAGAAATAACCAATGCATAGATGACAAGTGA	23.6738	1	1
OK006_E_250	Conotoxin precursor	SF-mi2	SF-mi2 01	OK006A_TRINITY_DN19071_c0_g1_i1_Frame_R1	MRFYLRLTVTLLLTLSTGGDAGPRRANGLPTHFVLRTCTGNCSLCGAVCCCE	ATGAGATTTTACCTGCGGCTGACCGTCACGCTGCTTCTGACTTTGTCCACTGGTGGTGATGCTGGACCGAGGCGTGCTAATGGCTTACCAACACATTTCGTACTTCGTACTTGCACAGGGAACTGTAGTCTATGTGGCGCCGTATGTTGTTGTGAA	49.1144	0	0
OK006_E_251	Conotoxin precursor	SF-mi2	SF-mi2 01	OK006A_TRINITY_DN29170_c0_g1_i1_Frame_R3	MRFYLLLTVSLLLTLSTDGDAGPRRANGLPKHFVLRTCTGNCRPCCAICCCE	ATGAGATTTTACCTGCTGCTGACCGTCTCGCTGCTTCTGACATTGTCCACTGATGGTGATGCTGGACCGAGGCGTGCGAATGGCTTACCAAAACATTTCGTACTTCGTACATGCACAGGGAACTGTCGTCCATGTTGCGCCATATGTTGTTGTGAA	18.5282	0	0
OK006_E_252	Conotoxin precursor	SF-mi2	SF-mi2 01	OK006A_TRINITY_DN11490_c0_g1_i1_Frame_R1	MRFYLLLTVTLLLTLPTGGDAGPRRANGLPNHFVLRTCTGYCRLCGAICCCETKVFRNNQCIGDK*	ATGAGATTTTACCTGCTGCTGACCGTCACGCTGCTTCTGACATTGCCCACTGGTGGTGATGCTGGACCGAGGCGTGCTAATGGCTTACCAAATCATTTCGTACTTCGTACTTGCACAGGGTACTGTCGTCTATGTGGCGCCATATGTTGTTGTGAAACCAAGGTTTTCAGAAATAACCAATGCATAGGTGACAAGTGA	103.216	1	1
OK006_E_253	Conotoxin precursor	SF-mi2	SF-mi2 01	OK006A_TRINITY_DN11490_c1_g1_i1_Frame_R1	MRFYLLLIVTLLLTLSTGGDAGPSRANCLPKHFVLLTCTGNCRLCG	ATGAGATTTTACCTGCTGCTGATCGTCACGCTGCTTCTGACATTGTCTACTGGTGGTGATGCTGGACCTAGTCGTGCTAATTGCTTACCAAAACATTTCGTACTTCTTACTTGCACAGGGAACTGTCGTCTATGTGGC	59.5458	0	0
OK006_E_254	Conotoxin precursor	SF-mi2	SF-mi2 01	OK006A_TRINITY_DN12619_c1_g1_i1_Frame_R3	VTLLLALSTGGDAEPRRTNGLQKHFVRRDCRTGCVGCGNPNGCCCGGQVCVDDTRCE*	GTCACGCTGCTTCTGGCATTGTCCACTGGTGGTGATGCTGAACCGAGGCGTACTAATGGGTTACAAAAACATTTCGTACGTAGAGATTGTCGAACCGGCTGTGTTGGATGTGGCAACCCTAATGGATGTTGTTGTGGTGGCCAAGTTTGCGTAGATGATACAAGATGCGAATGA	5.07147	1	0
OK006_E_255	Conotoxin precursor	SF-mi2	SF-mi2 01	OK006A_TRINITY_DN12619_c1_g1_i2_Frame_R2	MRCHLLLTIALLLTSFNGGDAGPMQAYRHFVRRDCQTGCVGCNNPNGCCCGGQVCVDDTRCE*	ATGAGATGTCACCTGCTGCTGACCATTGCGCTGCTTCTGACATCGTTCAATGGCGGTGATGCGGGACCAATGCAAGCTTATCGGCATTTCGTACGTAGAGATTGCCAAACCGGCTGTGTTGGATGTAACAACCCTAATGGATGTTGTTGTGGTGGCCAAGTTTGCGTAGATGATACAAGATGCGAATGA	1.4693	1	1
OK006_E_256	Conotoxin precursor	SF-mi2	SF-mi2 02	OK006A_TRINITY_DN23_c13_g1_i1_Frame_R2	MEFRRLVTVALLLALVLSIDAEPMQGMEAEGHFVRRDCGEGCGTCGGGCCCIPDSCVDSQCQSHVGPN*	ATGGAATTTCGCCGGCTTGTGACTGTGGCGCTGCTTCTGGCTTTGGTCCTGAGTATTGATGCGGAGCCAATGCAAGGAATGGAAGCAGAAGGACATTTCGTACGTAGAGATTGCGGCGAAGGCTGTGGGACGTGCGGCGGTGGATGTTGTTGTATCCCCGACAGTTGCGTAGACAGCCAATGCCAGAGTCACGTGGGGCCAAACTGA	58744.3	1	1
OK006_E_257	Conotoxin precursor	SF-mi2	SF-mi2 02	OK006A_TRINITY_DN269_c0_g1_i2_Frame_F3	MELRRHVTVALLLALVLSIEAEPMQGMVAEGHFVRRDCGEGCGTCGGGCCCIPDSCVDSQCQMP*	ATGGAATTACGCCGGCATGTGACTGTGGCTCTGCTTCTGGCTTTGGTCCTGAGTATTGAAGCGGAGCCAATGCAAGGAATGGTAGCAGAAGGACATTTCGTACGTAGAGATTGCGGCGAAGGCTGTGGGACGTGCGGCGGTGGATGTTGTTGTATCCCCGACAGTTGCGTAGACAGCCAATGCCAGATGCCTTGA	36.927	1	1
OK006_E_258	Conotoxin precursor	SF-mi2	SF-mi2 02	OK006A_TRINITY_DN269_c0_g1_i4_Frame_F3	MELRRHVTVALLLALVLSIEAEPMQGMVAEGHFVRRDCGEGCGTCGGGCCCIPDSCVDSQCHSHVGPN*	ATGGAATTACGCCGGCATGTGACTGTGGCTCTGCTTCTGGCTTTGGTCCTGAGTATTGAAGCGGAGCCAATGCAAGGAATGGTAGCAGAAGGACATTTCGTACGTAGAGATTGCGGCGAAGGCTGTGGGACGTGCGGCGGTGGATGTTGTTGTATCCCCGACAGTTGCGTAGACAGCCAATGCCATAGTCACGTAGGTCCAAACTGA	5.65155	1	1
OK006_E_259	Conotoxin precursor	SF-mi2	SF-mi2 02	OK006A_TRINITY_DN854_c12_g1_i1_Frame_R1	ALLLALVLSIDAEPIHGMEAEGHLVRRDCGEACGTCVGGCCCIHDSCVDSQCQ*	GCGTTGCTTCTGGCTTTGGTCCTGAGTATTGATGCGGAGCCAATACATGGAATGGAAGCAGAAGGACATCTCGTACGTAGAGATTGCGGCGAAGCCTGTGGGACGTGCGTCGGTGGATGTTGTTGTATCCACGACAGTTGCGTAGACAGCCAATGCCAGTGA	2.91335	1	0
OK006_E_260	Conotoxin precursor	Tand01		OK006A_TRINITY_DN379_c0_g1_i2_Frame_R2	MKSAVSMMALSMSIFTGFTMASATPDVLCITPVGQLSELCTTIGGTCAEYYHWKGKNNCSRFCECDVGVACPTDEAHAIVRGTVKRPLTHYTCEPITEFPKCEVDDVAIVNSGPGLRRVVKCICPWKYMYDGNSSHICKD*	ATGAAGTCAGCAGTCTCCATGATGGCGCTGTCTATGTCCATTTTCACTGGCTTTACGATGGCATCAGCAACACCAGACGTGCTTTGCATCACTCCGGTTGGCCAGCTTTCCGAATTGTGTACTACAATCGGCGGAACGTGTGCTGAATATTACCACTGGAAAGGTAAAAACAACTGCTCCCGTTTCTGCGAATGCGACGTCGGAGTGGCCTGCCCTACTGATGAAGCTCATGCAATCGTACGCGGCACCGTGAAACGTCCCTTGACTCATTACACGTGCGAGCCGATCACAGAATTTCCAAAATGTGAAGTGGACGATGTTGCTATAGTGAATTCTGGTCCCGGACTCCGCAGGGTGGTCAAATGCATCTGTCCCTGGAAGTACATGTATGACGGCAAT…	40.4907	1	1
OK006_E_261	Conotoxin precursor	Tpra06		OK006A_TRINITY_DN1131_c0_g1_i4_Frame_R2	MLSMLAWTLMTAMVVMNAHGQVCPTMTDSYARENECHYDHNLCGKEVSGSCSSLCNCKNSQECSTDSDHTITVVKRYVNNQPERKRYYTCVALSSLNECSGTQEALYVLTPEANELKSVKVLCRCPSTKVYLLARNPQRYVCTTAAPLSTRTT*	ATGCTGTCGATGCTCGCATGGACTTTGATGACAGCAATGGTGGTGATGAATGCTCATGGTCAAGTTTGCCCTACTATGACAGACAGCTATGCTAGGGAAAACGAATGTCATTATGACCATAACCTGTGCGGAAAGGAAGTGTCGGGGAGCTGCTCATCTCTGTGCAACTGTAAAAACAGCCAGGAGTGTTCCACGGACAGCGATCACACCATTACTGTCGTGAAACGTTACGTAAACAATCAACCTGAAAGGAAGAGGTATTACACGTGCGTGGCTCTTTCTTCATTAAACGAATGTTCCGGCACCCAGGAAGCCCTGTACGTTTTAACTCCTGAAGCCAACGAACTAAAAAGTGTGAAGGTTCTTTGTCGATGTCCATCTACAAAAGTGTACCTTCTC…	39952.4	1	1
OK006_E_262	Conotoxin precursor	Tpra06		OK006A_TRINITY_DN11387_c0_g1_i1_Frame_F1	MLAWTSMTAMVVMNAHGQVCPTMTDSYARENECHYDHNLCGKEVSGSSSSLCNCKNSQECSTDSDHTITVVKRYVNNQPERKRYYTCVALSSLNECTGTQEALYVLTPEANELKSVKVLCRCPSTKVYLLARNPQRYVCTTAAPLSTRTT*	ATGCTCGCATGGACTTCGATGACAGCAATGGTGGTGATGAATGCTCATGGTCAAGTTTGCCCTACTATGACAGACAGCTATGCTAGGGAAAACGAATGTCATTATGACCATAACCTGTGCGGAAAGGAAGTGTCGGGGAGCTCCTCATCTCTGTGCAACTGTAAAAACAGCCAGGAGTGTTCCACGGACAGCGATCACACCATTACTGTCGTGAAACGTTACGTAAACAATCAACCTGAAAGGAAGAGGTATTACACGTGCGTGGCTCTTTCTTCATTAAACGAATGTACCGGCACCCAGGAAGCCCTGTACGTTTTAACTCCTGAAGCCAACGAACTAAAAAGTGTGAAGGTTCTTTGTCGATGTCCATCTACAAAAGTGTACCTTCTCGCCCGCAAT…	8.24382	1	1
OK006_E_263	Conotoxin precursor	Tpra06		OK006A_TRINITY_DN11387_c1_g1_i1_Frame_F3	MLSMLAWTLMTAMVVLNSYGQFCPTMTDSRPGENKCLHDNYLCGKEDDSGSCTSLCYCKSGQMCFRDNDHTITAVPRIINDRPVEITYYTCVALSSLNECSGIQEALKVLSPE	ATGCTGTCGATGCTCGCATGGACTTTGATGACAGCAATGGTTGTGTTGAATTCTTATGGTCAATTTTGCCCTACTATGACAGACAGCCGTCCCGGGGAAAACAAATGTCTTCATGACAATTACCTGTGCGGAAAGGAGGACGACTCGGGGAGCTGCACATCTCTGTGCTACTGTAAAAGCGGGCAGATGTGTTTCAGGGACAACGATCACACCATTACTGCCGTGCCACGTATCATAAACGATCGCCCTGTTGAGATCACGTATTACACGTGCGTAGCTCTTTCTTCATTAAACGAATGTTCCGGCATCCAGGAAGCCCTGAAAGTTTTATCTCCAGAA	4.21501	0	0
OK006_E_264	New putative conotoxin precursor	Virro01		OK006A_TRINITY_DN9438_c1_g1_i1_Frame_F2	MLKMPVLLLTILLLLLMATAQDDKRVQGNAAQSDHIISRQNCVQQNGVCNEAKNLSCCETSSGLTCSATGQNDRNPTCQVRHGRDE*	ATGCTGAAAATGCCAGTCCTCCTTCTCACCATCCTTCTGCTGCTGCTCATGGCAACAGCCCAGGATGACAAACGTGTCCAAGGAAACGCTGCGCAGAGTGATCACATCATATCCAGACAGAACTGCGTGCAGCAGAATGGAGTTTGTAATGAAGCTAAGAACCTTTCATGCTGCGAAACGTCCTCTGGACTCACGTGCAGTGCTACAGGTCAAAATGATAGAAACCCGACTTGCCAGGTCCGCCATGGCCGCGATGAGTGA	3.26108	1	1
OK006_E_265	Hormone	Conopressin/Conophysin	Conopressin/Conophysin-1	OK006A_TRINITY_DN5357_c0_g1_i1_Frame_R3	RLTLVLCLLLLLLLTTQACFIRNCPKGGKRDVDERQLVHACMFCSFGQCVGPHICCGDGGCQMGTPEANRCSQEDESPIPCRVIGNHCSLNNPGNIHGHCVAYGICCVDDTCTTHSGCL*	CGACTGACGTTGGTGCTGTGTTTGCTGTTGCTGCTATTGCTCACTACCCAGGCTTGCTTCATCAGAAACTGCCCAAAAGGTGGCAAGAGAGATGTGGACGAAAGACAACTTGTGCATGCGTGCATGTTCTGTAGCTTTGGCCAGTGCGTGGGGCCCCATATCTGCTGTGGAGATGGAGGATGCCAAATGGGAACCCCAGAAGCGAACAGATGCAGCCAAGAGGACGAGAGTCCTATTCCTTGCCGAGTCATTGGTAACCACTGCTCTCTTAACAACCCAGGCAACATCCACGGCCACTGTGTGGCTTATGGCATCTGCTGTGTGGATGATACTTGTACCACGCACTCGGGATGTCTGTAG	1.70295	1	0
OK006_E_266	Hormone	Conopressin/Conophysin	Conopressin/Conophysin-1	OK006A_TRINITY_DN4754_c0_g2_i1_Frame_F1	MARSAMQIGRLTLVLCLLLLLLLTTQACFIRNCPPGGKSDVDERQPVNACMFCSFGQCVGPHTCCGDGGCEIGTPEANNCSHEDESPIPCQVIGDHCALNNISNIHGHCVANGTCCVDDTCTTHPGCL*	ATGGCGCGCTCAGCCATGCAGATTGGGCGACTGACGTTGGTGCTGTGTTTGCTGTTGCTGCTACTGCTCACTACCCAGGCTTGCTTCATCAGAAACTGCCCACCAGGTGGCAAGAGTGATGTGGACGAAAGACAACCTGTGAATGCGTGCATGTTCTGTAGCTTTGGCCAGTGCGTGGGGCCCCATACCTGCTGTGGAGATGGAGGATGCGAAATTGGAACCCCAGAAGCGAACAACTGCAGCCATGAGGACGAGAGTCCTATTCCTTGCCAAGTCATTGGTGACCACTGCGCTCTGAACAACATAAGCAACATCCACGGCCACTGTGTTGCTAATGGCACCTGTTGTGTGGATGATACTTGTACCACCCACCCGGGATGTCTGTAG	37.6921	1	1
OK006_E_267	Hormone	Conopressin/Conophysin	Conopressin/Conophysin-2	OK006A_TRINITY_DN520_c2_g1_i1_Frame_R1	MKCSVLQMSRLSWAMCLMLLMLLLLGTAQGCFIRNCPRGGKRAVDAMQPTRQCMSCGPEGVGQCVGPNVCCGLGLGCLMGTPETEVCQKENESSVPCAISGRRCGMDNTGNCVADGICCVEDACSFNSLCRVDTDQEDSVSARQELLTLIRRLLVNRQYD*	ATGAAGTGTTCAGTTCTGCAGATGAGCCGCCTGTCCTGGGCCATGTGTCTGATGCTGCTGATGCTGCTGCTCCTAGGAACTGCCCAGGGCTGCTTCATCAGGAACTGTCCTCGGGGCGGCAAGAGAGCGGTGGACGCCATGCAGCCTACCAGACAGTGCATGTCGTGCGGCCCGGAGGGCGTGGGCCAGTGCGTGGGACCCAACGTTTGCTGCGGACTGGGCCTGGGATGCCTGATGGGAACGCCGGAAACGGAAGTCTGTCAGAAAGAGAACGAGAGTTCCGTCCCCTGCGCGATCAGTGGTCGCCGCTGCGGCATGGACAACACGGGCAACTGTGTGGCTGACGGCATCTGCTGTGTGGAAGATGCCTGCTCGTTCAACTCGCTGTGCAGAGTGGAC…	1.39235	1	1
OK006_E_268	Hormone	Insulin-related peptide	Insulin-related peptide-5	OK006A_TRINITY_DN7743_c0_g1_i2_Frame_R3	MTTSSYFLLVALGLLLYVCQSSFGQDHSCERNAAPHPKGKCGSILADYVEEMCEKEEAENAGTNNIRKTRGRASPLRKRFLSMLKTRAKRNESFLLKRATQGIVCECCHNHCTDEEFTEYCPAVSES*	ATGACGACATCGTCCTACTTTCTGCTGGTGGCCCTAGGCCTTCTGCTGTACGTGTGTCAGTCTTCCTTTGGCCAGGATCATTCCTGCGAGCGTAATGCCGCTCCTCATCCGAAGGGCAAATGTGGGTCTATATTGGCTGACTATGTCGAAGAAATGTGTGAAAAAGAGGAAGCTGAGAATGCTGGAACAAACAACATAAGGAAGACAAGAGGGCGGGCCTCTCCGCTGAGGAAGCGCTTTCTCTCCATGCTGAAGACACGGGCCAAGAGGAATGAATCATTTCTTCTGAAGAGAGCTACCCAGGGAATAGTCTGTGAATGTTGTCACAATCACTGCACTGATGAAGAATTTACCGAGTATTGTCCCGCAGTCAGTGAATCATAA	0.99596	1	1
OK006_E_269	Hormone	Prohormone-4a		OK006A_TRINITY_DN9_c0_g1_i3_Frame_F3	LAHPMNPTNPYSPMNPVTNLAHPMNPANPYNPMNPVNSWYNPMNFQYPFHPPMRVASYYLTPPLGSSYLFPSNGYGHFHLAPTQAAAPLNLHMHFPYSYQAGGMYNPYMYPYQSSALYQPYGYAAGVPGAMAWNQFRGAAWNPYSAMGYGAYPMWPAQFAHMWPLHPYYQTVMPAQEGMCSYDRPFKCWGSATCIAIEAICDKNFDCNNHADEDPRICVAGRRPSYDILVSYLMLPNQHWMLQKLFNNVDPYTAAHALKLATSLGDLRWSLALTDENINNTKTVLEAVKNDNKDPLVSLGMQASAWESVKFLMKNLLSTDFFSD*	CTCGCCCATCCTATGAACCCTACGAACCCCTATAGTCCTATGAATCCTGTGACCAACCTCGCCCATCCTATGAACCCTGCGAACCCCTATAATCCCATGAATCCTGTCAACAGCTGGTACAATCCCATGAACTTCCAATACCCCTTCCACCCTCCCATGCGAGTGGCTTCCTATTACCTCACTCCGCCTCTGGGCAGCTCCTACCTCTTTCCCTCTAACGGCTACGGCCACTTCCACCTTGCTCCTACGCAGGCGGCGGCACCGCTCAATCTTCACATGCACTTCCCGTACTCCTACCAGGCTGGTGGTATGTACAATCCTTACATGTACCCGTATCAGTCGTCGGCCCTGTATCAGCCCTACGGCTACGCTGCGGGTGTTCCTGGGGCCATGGCATGG…	850.287	1	0
OK006_E_270	Other venom-related protein	Conoporin		OK006A_TRINITY_DN2942_c0_g1_i5_Frame_F3	MRVPFPALKTMVTVFLLLMGNMSPVVPRSSIPLDKVKVLAYEVVTSGNSLNGVTLQDLAETEYDVTCVVQVENWTRYPLIAPRLRIANDGAVTTSPVAILPGKREAFAVRKASYVRKGVYGTVSWELLGARRRFVIMWSAPYDLNKYSNWMGLGMTREGLMDVAPDNTWFNQMYYGSSSGNLTFKRKEFYYNTDPFIYSNEKFEAEGDMTNGHHAQVRVIIRPTRNNWEDLADEIRQNMV*	ATGAGGGTTCCATTCCCGGCACTGAAGACGATGGTGACTGTTTTCCTTCTGTTGATGGGGAACATGTCACCAGTTGTTCCGAGGTCTTCCATCCCTCTCGACAAGGTGAAGGTGCTTGCTTACGAAGTTGTCACTTCAGGGAATTCGCTGAATGGTGTCACTCTACAGGACTTGGCAGAGACCGAGTACGACGTTACGTGCGTCGTTCAAGTGGAGAACTGGACTCGCTACCCCTTGATTGCCCCCAGACTACGGATCGCCAATGATGGGGCCGTTACCACAAGTCCTGTTGCCATACTACCGGGAAAGAGAGAGGCCTTTGCCGTGCGGAAGGCTTCATATGTGCGTAAAGGCGTGTATGGCACTGTGTCCTGGGAATTGCTTGGGGCCAGGCGACGC…	NA	1	1
OK006_E_271	Other venom-related protein	Conoporin		OK006A_TRINITY_DN2942_c0_g1_i8_Frame_F3	MRVPFPALKTMVTVFLLLMGNASPVHPAKGAIAARVASIASSVVKAGTSLAGTTLQSLADPGFSVTCTIQVENWTRYALMYPTVLTWGNPAVTSAPTAILPTKIEAFSTRKPRSTATGVSGTVSWELQGAHRRFVLMWSAPFNFNHHSNWMGVGMTRLGLVDVAPGNTWFNQMYYRGNNEDLTFNRREFYNNLRPVIYRNDKFEIVGFMTNIHRAQIRVVIRPTINNWRDMALPIQALLVEQEEEVCNSTTERMWASAL*	ATGAGGGTTCCATTCCCGGCACTGAAGACGATGGTGACTGTTTTCCTTCTGTTGATGGGAAACGCGTCACCAGTCCATCCAGCCAAGGGTGCCATTGCTGCCAGGGTGGCGTCGATTGCTTCCTCAGTTGTCAAAGCGGGGACTTCTCTGGCTGGTACTACTCTACAGAGTCTGGCAGATCCCGGCTTCAGTGTTACGTGCACCATTCAAGTGGAGAACTGGACTCGCTACGCCTTGATGTACCCCACTGTGCTCACCTGGGGCAATCCGGCTGTTACCTCAGCTCCTACTGCCATACTACCGACAAAGATAGAGGCCTTTTCCACGCGGAAGCCTAGAAGCACAGCTACAGGTGTGTCGGGCACTGTGTCCTGGGAATTGCAGGGGGCCCATCGACGC…	NA	1	1
OK006_E_272	Other venom-related protein	Conodipine	Conodipine-2	OK006A_TRINITY_DN10365_c0_g1_i1_Frame_F3	MKMLESALWILAALALTWIVAQDSSTAELCKINSNGCSVPSALIPCQKHFLAACDIHDNCYLCGAHFGLTRNNCDNAFLTHMTALCAQGTDEGGFCLERRKRREASSMFITTTPLRQLRLLEKLMPPNSLSDHDSRQPQQRFFTCTDWAKNYFDAVRISGSSYFSDTANATYCPQFVDCMPQV*	ATGAAGATGCTGGAATCGGCCCTGTGGATACTGGCAGCTCTGGCACTGACATGGATTGTGGCTCAGGATTCCAGTACGGCTGAGTTATGCAAGATCAACAGCAACGGTTGCAGTGTTCCTTCTGCGTTGATACCATGCCAAAAGCATTTCCTTGCCGCCTGTGACATACACGATAACTGTTACCTTTGTGGAGCGCATTTCGGCCTCACGCGGAACAACTGCGACAACGCTTTTCTCACACACATGACTGCTCTGTGTGCCCAAGGCACTGATGAGGGAGGCTTCTGCCTGGAGAGACGGAAACGAAGAGAAGCTTCCAGCATGTTCATCACCACCACCCCTCTCAGACAACTACGGCTCCTGGAGAAACTCATGCCCCCGAATTCCTTGTCGGACCAT…	NA	1	1
OK006_E_273	Other venom-related protein	Ferritin		OK006A_TRINITY_DN157_c0_g1_i1_Frame_R2	MAVSQCRQNYHAECEAGINRQINMELHASYCYQSMAFYFDRDDVALPGFAKFFRKSSEEEREHAEKLMTFQNQRGGRIVLQDIKKPDRDEWGSGLDAMQVALALEKSVNQSLLDLHEVATNHNDAQMTDFLEGNYLQEQVRSIKELGDYITNLKRVGPGLGEYMFDKETLQE*	ATGGCTGTCAGTCAGTGCCGTCAGAACTACCACGCCGAGTGTGAAGCTGGCATCAACCGACAGATCAACATGGAACTTCATGCCAGTTATTGCTACCAGTCCATGGCATTCTACTTTGACCGTGATGATGTAGCTCTGCCGGGGTTTGCCAAGTTCTTCAGAAAGTCGTCTGAAGAAGAACGCGAGCATGCTGAGAAGCTGATGACATTCCAGAACCAGCGTGGCGGCCGTATTGTCCTGCAGGATATCAAGAAACCTGATCGGGATGAGTGGGGCTCGGGTCTGGACGCTATGCAAGTGGCGCTGGCGCTGGAGAAGAGCGTCAACCAGTCGCTGCTGGACCTGCATGAGGTGGCCACCAATCACAACGATGCCCAGATGACAGACTTCCTGGAAGGC…	NA	1	1
OK006_E_274	Other venom-related protein	Ferritin		OK006A_TRINITY_DN310_c0_g1_i1_Frame_R3	MAHNVSQCRQNYHAESEAGVNRQINMELYASYCYQSMSFYFDRDDVALPGFAKFFKEASEEEREHAEKLMKFQNKRGGRVVLQDIKKPDRDEWGTGLDAMQVALGLEKSVNQALLDLHEVAASHKDAQMTDFLEGEYLQEQVESIKKIGDHITNLKRVGTGLGEYMFDKNLS*	ATGGCCCACAACGTCAGCCAGTGCCGCCAGAACTACCACGCCGAGAGCGAGGCTGGGGTCAACAGGCAGATCAACATGGAGCTGTATGCCTCCTACTGCTATCAGTCCATGTCGTTCTACTTCGACCGTGACGACGTGGCGCTGCCAGGGTTTGCCAAGTTCTTCAAGGAGGCCTCAGAGGAGGAGCGCGAGCACGCCGAGAAGCTGATGAAGTTCCAGAACAAGCGAGGAGGCCGTGTGGTGCTTCAGGACATCAAGAAGCCTGACCGTGACGAGTGGGGCACAGGACTGGACGCCATGCAGGTGGCCCTGGGGCTGGAGAAGAGCGTCAACCAGGCCCTGCTGGACCTGCATGAGGTCGCCGCCAGCCACAAGGACGCCCAGATGACGGACTTCCTG…	NA	1	1
OK006_E_275	Other venom-related protein	Ferritin		OK006A_TRINITY_DN8173_c0_g3_i1_Frame_R1	MEYQNMRGGRILLQTVKKPDRDDWGSGLEALQAALQLEKSINQSMLELHQCASCHNDPQMSDFVEDSFLKEQVETIKEISDYITNLKRVGTGLGEFIFDKETLQEKQE*	ATGGAATACCAGAACATGCGCGGTGGCCGCATTCTCCTGCAGACCGTGAAGAAGCCGGACCGTGACGACTGGGGCAGCGGACTGGAGGCCCTGCAGGCGGCCCTGCAGCTGGAGAAGTCCATCAACCAGTCCATGCTGGAACTGCACCAGTGTGCCAGCTGTCATAATGACCCTCAGATGAGCGACTTTGTGGAGGACAGCTTCCTCAAGGAGCAAGTGGAGACCATCAAAGAGATCAGCGACTACATCACCAACCTTAAGCGAGTGGGCACAGGACTGGGCGAGTTCATCTTCGACAAGGAAACCCTGCAGGAAAAACAGGAGTGA	NA	1	1
OK006_E_276	Other venom-related protein	Insulin-like growth factor binding protein	Insulin-like growth factor binding protein	OK006A_TRINITY_DN5_c5_g1_i1_Frame_F3	MRGQVLLFITAMLLTGIMAAKKCPTCDPEACPKLNGANCLAGTTKDECGCCDVCAKLEGEACDISAENDPCGDGLQCRDAEGTGPICQCRFQEIMCGSDNKTYTNLCQLLTTAVRERRTNTLNVKRVGPCEPGARIVTKPEYVRNHTKSNVVLQCEAMGLPTPSMTWVFTRADNQTYNVPGDDFKMVTSSRGGPGKYMVTSWLQIEGLQKVHEGDYTCVAINQHHTDRAKARIKVVERQ*	ATGAGGGGGCAGGTCCTACTTTTTATCACGGCGATGCTGCTCACTGGCATCATGGCCGCCAAGAAATGCCCCACCTGCGATCCCGAAGCTTGCCCGAAACTGAACGGTGCTAACTGTCTGGCAGGAACAACCAAAGACGAGTGTGGCTGCTGTGATGTGTGCGCCAAACTAGAGGGGGAGGCCTGCGACATCAGTGCAGAGAACGATCCCTGCGGAGATGGGCTGCAGTGCAGGGACGCGGAGGGCACGGGGCCTATCTGCCAGTGCCGGTTCCAGGAGATCATGTGCGGCAGCGACAACAAAACATACACCAACCTGTGCCAGCTGCTGACCACTGCTGTCCGCGAGCGGCGCACCAACACGCTCAACGTGAAACGTGTGGGACCTTGCGAACCCGGT…	NA	1	1
OK006_E_277	Other venom-related protein	Kazal protease inhibitor	Kazal protease inhibitor-1	OK006A_TRINITY_DN25409_c0_g1_i1_Frame_F3	MKTAVCVFLTVLALAHGDVEDICNQACTMESDPHCLTFQKTVPNECMGEVEICRMRAQGFVKTDTRNKTCECAIGCTMNYDPVCSRDLDTNETKEYGNACALRAECEPKKLVKVHLDECD*	ATGAAGACCGCGGTGTGCGTTTTCCTCACTGTTCTTGCTTTGGCGCATGGCGATGTGGAGGACATCTGTAATCAAGCATGCACCATGGAAAGTGACCCCCACTGCCTGACTTTCCAAAAGACTGTGCCCAACGAATGTATGGGAGAAGTGGAAATCTGCAGAATGAGAGCGCAGGGATTCGTGAAGACCGACACCAGGAACAAGACCTGTGAGTGTGCCATCGGCTGTACGATGAATTACGATCCTGTGTGTAGCCGGGACCTGGACACGAACGAAACCAAAGAGTATGGCAACGCATGTGCACTCAGGGCTGAATGCGAACCAAAGAAGTTGGTAAAGGTGCATCTGGACGAGTGTGACTGA	NA	1	1
OK006_E_278	Other venom-related protein	Kazal protease inhibitor	Kazal protease inhibitor-1	OK006A_TRINITY_DN43542_c0_g1_i1_Frame_R2	CNRPCTKEYLPHCLTFQKTVSNKCAGDIEICKMRAQGYTVTSSTNGTCTCSPICTMEYNPVCAMDLDTKTTTKFGNPCGLNLAVCQGKRMGEVPLNTCPELYE*	TGTAACAGACCTTGTACCAAGGAGTATTTACCCCATTGCCTGACGTTCCAGAAGACTGTGTCCAACAAGTGTGCAGGAGACATTGAAATCTGCAAGATGAGAGCACAGGGGTACACTGTGACCTCCAGCACTAACGGCACCTGTACCTGCAGCCCCATCTGTACGATGGAGTACAATCCTGTGTGTGCCATGGACCTGGACACTAAAACCACCACAAAGTTCGGCAACCCGTGTGGTCTCAACCTGGCAGTCTGCCAAGGAAAGAGGATGGGAGAGGTGCCCCTGAACACGTGTCCTGAACTTTATGAATGA	NA	1	0
OK006_E_279	Other venom-related protein	Kazal protease inhibitor	Kazal protease inhibitor-2	OK006A_TRINITY_DN35150_c0_g1_i1_Frame_R1	MKTYCLLIVLLVGVAIQVEGQLDNKCPMICTMNYAPVCGSDGETYSNECMLRTKSCMSGRSITVLHNGQC*	ATGAAGACATACTGTCTGCTTATTGTGCTTTTGGTGGGCGTGGCCATCCAAGTGGAGGGTCAGCTGGACAACAAGTGCCCGATGATATGCACCATGAATTACGCCCCTGTCTGTGGCTCCGACGGGGAGACCTACTCCAACGAGTGCATGCTGAGAACCAAGTCTTGCATGAGCGGAAGATCCATTACAGTCCTCCACAATGGACAATGCTAA	NA	1	1
OK006_E_280	Other venom-related protein	Lysozyme		OK006A_TRINITY_DN1979_c5_g1_i1_Frame_F3	MKWVGFLVWCGLLFCVTGSDVPCRQAGGTCQQNSIYCSGNYRQNMCAGSASRQCCIPRRASSGSDTPCINKGGTCQYVQRQCTGQYHSNLCSGAANRRCCIPSSSSSGSSHSSGGYNCFGNFMNLHPTGASAQTARQDRIGHGGVSASQRMVSNDINELNNRKSCYIQAGNNNCVHPAVIAGIASRESRGGAAIERTGGWGDNHNAYGIMQCDGGASGLGRRCTRYAWDSCEHINMMVEILLVPYIRTMQSKHPSWAREQQLQGAVSAYNAGTGNVRTFDRMDEGTTGNDYSNDVMARAQYLVNNFRW*	ATGAAGTGGGTCGGTTTCCTGGTTTGGTGTGGTCTTCTTTTCTGCGTGACAGGGTCGGATGTTCCCTGTCGCCAGGCGGGCGGCACCTGTCAGCAAAATTCCATATACTGTTCTGGAAACTACCGGCAGAACATGTGTGCTGGGTCTGCCAGTAGACAGTGCTGCATCCCTCGCCGTGCCTCGTCAGGATCGGACACACCCTGTATCAACAAAGGCGGTACCTGTCAGTATGTTCAGCGCCAGTGTACTGGACAATATCACAGCAACCTGTGTTCTGGGGCTGCCAACAGACGGTGCTGTATTCCTTCCTCCAGCTCTTCAGGCTCATCGCACAGCTCTGGCGGTTACAACTGTTTCGGGAACTTCATGAACCTGCATCCTACAGGAGCCAGCGCCCAG…	NA	1	1
OK006_E_281	Other venom-related protein	PPI		OK006A_TRINITY_DN31352_c0_g1_i1_Frame_F3	MASACALSRLCARAVSSGANTFYGTRFSSKCMFVRFCSQKSGRPRVYFDMTADGETLGRIEFELFSDVVPKTAENFRALCTGEKGFGYKKSAFHRVIPSFMCQGGDFTRGNGTGGKSIYGNKFDDENFDLKHNKPGLLSMANAGPNTNGSQFFITTVVTSWLDGGHVVFGEVAKGMEVVKQIEKLGSESGRTKKKIEIDDCGEL*	ATGGCGTCAGCATGTGCCCTTTCCCGCCTATGTGCGCGCGCAGTGTCATCAGGCGCGAACACTTTCTATGGAACTCGGTTTTCGTCAAAATGCATGTTCGTCCGATTCTGCTCGCAGAAGTCAGGAAGACCTCGTGTTTATTTTGACATGACAGCTGATGGTGAAACACTGGGCAGAATAGAATTTGAGTTATTTTCTGATGTTGTCCCCAAAACAGCAGAGAATTTCCGTGCTCTCTGTACGGGTGAAAAAGGTTTTGGATACAAGAAGTCTGCCTTCCATCGTGTCATTCCTAGCTTCATGTGCCAGGGAGGTGACTTCACACGGGGTAATGGAACTGGGGGCAAGAGCATTTATGGCAACAAGTTTGATGATGAGAACTTCGATTTAAAACATAAC…	NA	1	1
OK006_E_282	Other venom-related protein	PPI	PPI-A	OK006A_TRINITY_DN5269_c0_g1_i1_Frame_R2	MANPRCFFDIQIDGKPVGRIVMELRADVVPKTAENFRALCTGEKGFGYKGSSFHRVIPDFMCQGGDFTRHNGTGGKSIYGEKFADENFQLKHTGPGILSMANAGPNTNGSQFFLCTAKTAWLDGKHVVFGSVVEGMDVVKQVEGVGSQSGKTSKKVMIADCGQL*	ATGGCCAATCCTCGGTGTTTCTTCGATATTCAAATAGACGGCAAACCTGTCGGAAGAATTGTCATGGAGTTGCGGGCCGATGTGGTTCCGAAAACAGCGGAGAACTTCAGAGCCCTGTGCACTGGGGAGAAAGGATTTGGCTACAAAGGATCATCCTTTCATCGAGTCATTCCTGACTTCATGTGTCAGGGAGGTGATTTTACAAGACACAATGGCACCGGTGGCAAGAGCATCTATGGTGAGAAGTTCGCTGATGAGAACTTCCAGCTGAAGCACACTGGACCAGGAATCCTTTCCATGGCCAATGCTGGTCCCAACACCAATGGCTCCCAGTTCTTCCTCTGCACTGCAAAAACAGCATGGCTGGATGGCAAGCACGTGGTGTTTGGCAGTGTGGTG…	NA	1	1
OK006_E_283	Other venom-related protein	PPI	PPI-A	OK006A_TRINITY_DN5269_c0_g1_i9_Frame_R3	MSKVENPKCFFDITLDDKPVGRIVMELRADVVPKTAENFRALCTGEKGFGYKGSSFHRVIPDFMCQGGDFTRHNGTGGKSIYGEKFADENFQLKHTGPGILSMANAGPNTNGSQFFLCTVKTEWLDRKHVVFGSVVEGMDVVKQVEGVGSQSGKTTKKVVIADCGQL*	ATGTCGAAAGTTGAGAATCCAAAGTGCTTTTTCGACATTACGCTGGATGACAAACCTGTAGGAAGAATAGTCATGGAGCTGCGGGCTGATGTGGTTCCCAAAACAGCAGAGAATTTCAGAGCCCTGTGCACAGGGGAGAAAGGCTTTGGGTACAAAGGATCATCCTTTCATCGAGTCATTCCTGACTTCATGTGTCAGGGAGGTGATTTTACAAGACACAATGGCACCGGTGGCAAGAGCATCTATGGTGAGAAGTTCGCTGATGAGAACTTCCAGCTGAAGCACACTGGACCAGGAATCCTTTCCATGGCCAATGCTGGTCCCAACACCAATGGCTCCCAGTTCTTCCTCTGCACTGTCAAGACCGAATGGCTGGATCGCAAGCACGTGGTGTTTGGC…	NA	1	1
OK006_E_284	Other venom-related protein	PPI	PPI-A	OK006A_TRINITY_DN5269_c0_g1_i7_Frame_R3	MSKVENPKCFFDITLDDKPVGRIVMELRADVVPKTAENFRALCTGEKGFGYKGSSFHRVIPNFMCQGGDFTNHNGTGGKSIYGNKFEDENFQLKHTGPGVLSMANAGPGTNGSQFFLCTVKTEWLDGKHVVFGSVVEGMEVVKKIEGVGSQSGKTSKKVVIDNCGQL*	ATGTCGAAAGTTGAGAATCCAAAGTGCTTTTTCGACATTACGCTGGATGACAAACCTGTAGGAAGAATAGTCATGGAGCTGCGGGCTGATGTGGTTCCCAAAACAGCAGAGAATTTCAGAGCCCTGTGCACAGGGGAGAAAGGCTTTGGGTACAAAGGATCATCCTTTCATCGAGTCATTCCTAATTTCATGTGCCAGGGAGGTGATTTTACAAACCACAATGGCACTGGTGGGAAGAGCATCTACGGAAACAAATTTGAAGATGAGAACTTCCAGCTGAAACACACTGGACCAGGAGTCCTTTCCATGGCGAATGCCGGTCCCGGTACCAATGGCTCCCAGTTCTTCCTCTGCACTGTCAAGACTGAATGGCTGGATGGCAAGCACGTGGTGTTTGGC…	NA	1	1
OK006_E_285	Other venom-related protein	PPI	PPI-A	OK006A_TRINITY_DN5269_c0_g1_i3_Frame_R2	MSNPKCFFDMTIGGSPAGRIVMELRADVVPKTAENFRALCTGEKGFGYKGSSFHRVIPNFMCQGGDFTNHNGTGGKSIYGNKFEDENFQLKHTGPGVLSMANAGPGTNGSQFFLCTVKTEWLDGKHVVFGSVVEGMEVVKKIEGVGSQSGKTSKKVVIDNCGQL*	ATGAGCAACCCTAAATGCTTCTTCGATATGACGATTGGCGGCAGCCCGGCAGGAAGGATTGTTATGGAGTTACGAGCTGATGTGGTTCCTAAAACAGCAGAGAACTTCAGAGCCCTGTGCACTGGGGAGAAAGGATTTGGCTACAAAGGATCATCCTTTCATCGAGTCATTCCTAATTTCATGTGCCAGGGAGGTGATTTTACAAACCACAATGGCACTGGTGGGAAGAGCATCTACGGAAACAAATTTGAAGATGAGAACTTCCAGCTGAAACACACTGGACCAGGAGTCCTTTCCATGGCGAATGCCGGTCCCGGTACCAATGGCTCCCAGTTCTTCCTCTGCACTGTCAAGACTGAATGGCTGGATGGCAAGCACGTGGTGTTTGGCAGTGTGGTG…	NA	1	1
OK006_E_286	Other venom-related protein	PPI	PPI-B	OK006A_TRINITY_DN42_c0_g1_i2_Frame_F1	MLASGIVLILLVHAFALADDKPKGPKVTEKVYFDIEIGGKAAGRIVIGLFGKTVPKTVENFKQLAIGEKEQDGKKLTYKGSKFHRVIKDFMIQGGDFTRGDGTGGRSIYGEKFPDENFKLKHYGSGWLSMANSGKDTNGSQFFITTKKTSWLDGRHVVFGTVLEGMDVVRKIEASKTDARDKPEKDVVIADCGALEVTKQFSVEKRDAPE*	ATGTTAGCAAGTGGAATTGTGCTCATTTTGCTTGTGCATGCTTTTGCACTTGCTGATGACAAACCTAAAGGGCCCAAAGTGACCGAAAAGGTTTATTTTGACATTGAAATAGGGGGCAAGGCAGCTGGGCGCATCGTCATCGGACTGTTTGGCAAAACTGTACCAAAAACTGTTGAGAATTTCAAGCAGTTAGCCATAGGAGAAAAGGAACAAGATGGCAAGAAACTTACCTACAAAGGCAGCAAATTCCACAGAGTGATCAAAGATTTCATGATTCAAGGAGGAGATTTCACCAGGGGTGATGGGACCGGTGGCCGCAGTATCTATGGGGAAAAGTTCCCTGATGAGAACTTCAAGCTGAAGCACTACGGATCTGGCTGGCTGTCCATGGCCAACTCC…	NA	1	1
OK006_E_287	Other venom-related protein	PPI	PPI-B	OK006A_TRINITY_DN2050_c4_g1_i1_Frame_F3	MLVCGAIVFLLVQGFAFADKPKGPKVTDKVFFDIEIGGEKAGRIVIGLFGKTVPKTAKNFKKLAEGFEESGETLTYKGSKFHRVIKEFMIQGGDFTRGDGTGGKSIYGEKFADENFKLQHYGPGWLSMANAGKDTNGSQFFITTKKTPWLDGRHVVFGKVLEGMKVVRKIEGTRTGDRDKPVKDVVIVDSGSLPVDEPFSVSKDPVSEEN*	ATGTTGGTCTGTGGAGCTATTGTTTTCTTGCTTGTGCAAGGTTTTGCATTTGCAGACAAGCCCAAGGGGCCGAAGGTAACGGACAAGGTGTTCTTTGACATTGAAATTGGTGGGGAGAAAGCAGGCCGTATTGTCATTGGCCTGTTTGGAAAAACTGTGCCGAAGACTGCAAAGAACTTCAAGAAGTTAGCTGAGGGATTTGAGGAAAGTGGAGAAACATTGACCTACAAAGGGAGCAAGTTCCACCGTGTGATCAAAGAGTTCATGATTCAGGGTGGAGATTTTACTCGGGGTGATGGAACTGGAGGGAAGAGCATTTACGGAGAGAAGTTTGCTGATGAGAACTTCAAGCTGCAGCACTATGGGCCAGGCTGGCTCTCCATGGCTAATGCTGGCAAG…	NA	1	1
OK006_E_288	Other venom-related protein	PPI	PPI-C	OK006A_TRINITY_DN34773_c0_g1_i1_Frame_R2	MAAITTQTRMQPPNITVETTMGVFVLEMYWKHAPTTCRNFVELCRRGYYNGVKFHRIIQDFMIQGGDPTGTGRGGSSIYGKNFNDEISEDLKHTGAGILSMANSGPDTNGSQFFITLAPTQWLDGKHTIFGRVSSGMTVVQRMGLVETDSNDRPLDDVKIVKSYPTLT*	ATGGCGGCAATCACAACGCAGACGAGAATGCAACCTCCAAATATTACTGTGGAAACAACAATGGGTGTGTTTGTCTTGGAAATGTACTGGAAACATGCGCCCACTACATGTCGGAACTTTGTGGAGTTGTGCCGAAGAGGTTACTACAATGGAGTCAAGTTCCACAGGATCATCCAGGATTTCATGATCCAAGGAGGCGACCCCACTGGCACAGGAAGAGGTGGCTCATCTATTTATGGCAAGAACTTCAACGATGAAATTTCTGAAGATTTGAAACACACGGGAGCAGGGATTCTGTCCATGGCCAACAGCGGGCCCGACACCAATGGCAGTCAGTTCTTCATCACACTGGCCCCCACACAGTGGCTGGACGGGAAGCACACCATCTTTGGGCGAGTC…	NA	1	1
OK006_E_289	Other venom-related protein	PPI	PPI-E	OK006A_TRINITY_DN2419_c0_g1_i2_Frame_F2	MASSANNKRMVYVGGLAEEVDDKVLHAAFLPFGDIVDVQIPLDYETEKHRGFAFIEFELAEDAAAAIDNMNESELFGRTIRVNLAKPMKVKEGASRAVWADDNWLQKHAGETLEESQDKEEEEESNKRPAEDDSEADSGASAAKRSRPAGNPQVYMDIKIGSRGVGRLVMELRADVVPKTAENFRCLCTYEKGYGFRGSSFHRIIPQFMCQGGDFTNHNGTGGKSIYGKKFEDENFQLRHTAAGDLSMANSGPNTNGSQFFITTAKTDWLDGKHVVFGRVTEGMDVVYKMEKCGTKGGKPTEKVTIAGCGELV*	ATGGCATCCTCTGCAAATAACAAGCGCATGGTCTACGTTGGTGGCTTAGCAGAAGAGGTTGACGACAAAGTGTTGCATGCAGCTTTCCTGCCGTTTGGTGACATAGTGGATGTTCAGATCCCATTGGATTATGAAACAGAAAAGCACAGAGGATTTGCATTCATTGAATTCGAACTGGCAGAAGATGCTGCGGCTGCCATTGACAACATGAATGAGTCAGAGCTGTTTGGTCGTACGATCCGTGTCAATCTGGCAAAGCCAATGAAGGTCAAAGAAGGAGCTTCAAGAGCAGTATGGGCTGATGACAACTGGCTTCAGAAACATGCAGGGGAAACTCTGGAAGAAAGCCAAGATAAAGAGGAGGAAGAAGAGTCCAACAAGAGGCCAGCGGAGGATGAT…	NA	1	1
OK006_E_290	Other venom-related protein	PDI	PDI-A2	OK006A_TRINITY_DN128_c0_g1_i8_Frame_R3	MKFATVFSLTLLAFVACEEVQQEEKVYVLKTKNFDNFIEENEFVLVEFYAPWCGHCKQLAPAYSEAAGKLMDEGSNVKLAKVDATVERDLAEKFEVKGFPTIKFFISGKPMDYGGGRQTSEIINWLKKKTGPPAKNVKTSEEAKTFIDSDEVIVMGFFKDQEGKGATAFKKIAVEIEDVAFGITSEDSVFKEHKMKKDGVVLFKKFDEGRNDFSGDFEEAAMSKFVKDNRLPLINEFTQETAQKLFTGDVQTHLVLFIKKEETKDTLDTFKAAAGEFKGKVLFIYLDTAKTENEHIMGFFGLKAADAPAMRLIQLGEDLAKYKPESDSLDKSTITKFVQDFLDGKLKPHLKSEEVPEDWDAQPVKVLVSKNFKEVAMDKSKAVFVEFYAPWCGHCKELA…	ATGAAGTTTGCAACTGTTTTCTCTCTCACGTTGCTGGCCTTTGTGGCCTGTGAAGAAGTTCAACAAGAGGAAAAAGTCTATGTTTTAAAGACAAAAAATTTCGACAACTTCATTGAGGAAAATGAATTTGTTCTTGTGGAGTTTTACGCACCGTGGTGCGGCCACTGCAAACAGCTGGCTCCTGCGTACAGCGAGGCTGCCGGGAAATTGATGGATGAGGGTTCCAACGTCAAGCTGGCCAAGGTTGATGCCACCGTGGAGAGGGACTTGGCAGAAAAATTTGAAGTCAAAGGTTTCCCCACCATCAAATTCTTCATCAGTGGCAAACCAATGGATTACGGAGGAGGCAGGCAGACTTCCGAAATCATCAACTGGCTGAAGAAGAAGACCGGCCCCCCT…	NA	1	1
OK006_E_291	Other venom-related protein	PDI	PDI-A2	OK006A_TRINITY_DN128_c0_g1_i3_Frame_R3	MKFATVFSLTLLAFVACEEVQQEEKVYVLKTKNFDNFIEENEFVLVEFYAPWCGHCKQLAPAYSEAAGKLMDEGSNVKLAKVDATVERDLAEKFEVKGFPTIKFFISGKPMDYGGGRQTSEIINWLKKKTGPPAKNVKTSEEAKTFIDSDEVIVMGFFKDQEGKGATAFKKIAVEIEDVAFGITSEDSVFKEHKMKKDGVVLFKKFDEGRNDFSGDFEEAAMSKFVKDNRLPLINEFTQETAQKLFTGDVQTHLVLFIKKEETKDTLDTFKAAAGEFKGKVLFIYLDTAKTENEHIMGFFGLKAADAPAMRLIQLGEDLAKYKPESDSLDKSTITKFVQDFLDGKLKPHLKSEEVPEDWDAQPVKVLVSKNFKEVAMDKSKAVFVEFYAPWCGHCKELA…	ATGAAGTTTGCAACTGTTTTCTCTCTCACGTTGCTGGCCTTTGTGGCCTGTGAAGAAGTTCAACAAGAGGAAAAAGTCTATGTTTTAAAGACAAAAAATTTCGACAACTTCATTGAGGAAAATGAATTTGTTCTTGTGGAGTTTTACGCACCGTGGTGCGGCCACTGCAAACAGCTGGCTCCTGCGTACAGCGAGGCTGCCGGGAAATTGATGGATGAGGGTTCCAACGTCAAGCTGGCCAAGGTTGATGCCACCGTGGAGAGGGACTTGGCAGAAAAATTTGAAGTCAAAGGTTTCCCCACCATCAAATTCTTCATCAGTGGCAAACCAATGGATTACGGAGGAGGCAGGCAGACTTCCGAAATCATCAACTGGCTGAAGAAGAAGACCGGCCCCCCT…	NA	1	1
OK006_E_292	Other venom-related protein	PDI	PDI-A2	OK006A_TRINITY_DN128_c0_g1_i1_Frame_R2	FGITSEDSVFKEHKMKKDGVVLFKKFDEGRNDFSGDFEEAAMSKFVKDNRLPLINEFTQETAQKLFTGDVQTHLVLFIKKEETKDTLDTFKAAAGEFKGKVLFIYLDTAKTENEHIMGFFGLKAADAPAMRLIQLGEDLAKYKPESDSLDKSTITKFVQDFLDGKLKPHLKSEEVPEDWDAQPVKVLVSKNFKEVAMDKSKAVFVEFYAPWCGHCKELAPIWDQLGEKFKDSKDIMIAKMDFTANELEEVKIKSFPTLKYFPKGSDEIIEYDDERTLEELTKFVESGGKQEPPKKEEEEKEEDDDKKKEEL*	TTTGGCATCACGTCAGAGGACAGCGTCTTTAAAGAGCATAAGATGAAGAAAGACGGCGTTGTTCTGTTTAAAAAGTTTGACGAGGGTCGCAATGACTTCTCTGGAGACTTTGAGGAGGCTGCCATGAGCAAGTTTGTCAAGGACAATCGCCTCCCTCTGATCAACGAGTTTACACAGGAGACTGCCCAGAAGCTCTTCACAGGGGACGTGCAGACCCACCTCGTGCTGTTCATCAAGAAGGAGGAAACAAAGGACACACTGGACACCTTTAAGGCTGCTGCCGGTGAATTCAAGGGGAAGGTCCTGTTTATCTACCTGGATACAGCCAAGACGGAGAATGAACACATCATGGGATTTTTCGGCCTCAAGGCTGCTGACGCTCCAGCAATGCGCCTGATA…	NA	1	0
OK006_E_293	Other venom-related protein	PDI	PDI-A2	OK006A_TRINITY_DN128_c0_g1_i6_Frame_R2	ETAQKLFTGDVQTHLVLFIKKEETKDTLDTFKAAAGEFKGKVLFIYLDTAKTENEHIMGFFGLKAADAPAMRLIQLGEDLAKYKPESDSLDKSTITKFVQDFLDGKLKPHLKSEEVPEDWDAQPVKVLVSKNFKEVAMDKSKAVFVEFYAPWCGHCKELAPIWGQLGEKFKDSKDIMIAKMDFTANELEEVKIKSFPTLKYFPKGSDEIIEYDDERTLEELTKFVESGGKQEPPKKEEEEKEEDDDKKKEEL*	GAGACTGCCCAGAAGCTCTTCACAGGGGACGTGCAGACCCACCTCGTGCTGTTCATCAAGAAGGAGGAAACAAAGGACACACTGGACACCTTTAAGGCTGCTGCCGGTGAATTCAAGGGGAAGGTCCTGTTTATCTACCTGGATACAGCCAAGACGGAGAATGAACACATCATGGGATTTTTCGGCCTCAAGGCTGCTGACGCTCCAGCAATGCGCCTGATACAGCTTGGCGAAGATCTGGCGAAGTACAAACCCGAGTCGGACTCTCTGGACAAGTCCACCATAACCAAGTTTGTTCAGGACTTCCTGGATGGCAAGCTGAAGCCTCACCTGAAGTCGGAGGAAGTGCCAGAGGACTGGGACGCCCAGCCTGTGAAGGTTTTGGTCAGCAAGAACTTC…	NA	1	0
OK006_E_294	Other venom-related protein	PDI	PDI-A2	OK006A_TRINITY_DN128_c0_g1_i10_Frame_R1	MKFATVFSLTLLAFVACEEVQQEEEVYVLNATNFDNFIMENEFVLVEFYAPWCGACKNLAPVYSEVAGILMDEGSNIKLAKVDVTVEKDLAEKFNVEGYPTIKFFSSGEPTDYTGGWQTSDFIKWLKKKTGPPAKNVKTSEEAKTFIDSDEVIVMGFFKDQEGKGATAFKKIAVEIEDVAFGITSEDSVFKEHKMKKDGVVLFKKFDEGRNDFSGDFEEAAMSKFVKDNRLPLINEFTQETAQKLFTGDVQTHLVLFIKKEETKDTLDTFKAAAGEFKGKVLFIYLDTAKTENEHIMGFFGLKAADAPAMRLIQLGEDLAKYKPESDSLDKSTITKFVQDFLDGKLKPHLKSEEVPEDWDAQPVKVLVSKNFKEVAMDKSKAVFVEFYAPWCGHCKELA…	ATGAAGTTTGCAACTGTTTTCTCTCTCACGTTGCTGGCCTTTGTGGCCTGTGAAGAAGTTCAACAAGAGGAAGAAGTCTATGTTTTAAATGCAACAAACTTCGACAACTTCATTATGGAAAATGAATTTGTTCTTGTGGAGTTTTACGCACCATGGTGCGGTGCCTGCAAGAACCTGGCTCCCGTGTACAGCGAGGTTGCTGGGATATTGATGGACGAGGGTTCCAACATCAAGCTGGCCAAGGTTGATGTCACTGTGGAGAAGGACTTGGCAGAAAAGTTCAATGTCGAAGGTTACCCCACCATCAAATTCTTCAGCAGTGGCGAACCAACAGATTACACTGGAGGCTGGCAGACTTCCGACTTCATCAAGTGGCTGAAGAAGAAGACCGGCCCCCCT…	NA	1	1
OK006_E_295	Other venom-related protein	PDI	PDI-A2	OK006A_TRINITY_DN573_c0_g1_i1_Frame_R2	MKFSSCLVLTLLVFVSAEEVKREEDVYVLTTKNFDSFIADNEFVLVEFYAPWCGHCKALAPEYAKAATALEEQNLNVKLGKVDATVEDSLAAKFEVRGYPTIKFFRKDKPKSPADYTGGRQSDDIINWLKKKTGPPAKELKEKDDVKSFVEKDEVVVIGFFKDQESTGALAFKKAAASIDDIPFAITSEDHVFKEYKMDKDGVVLLKKFDEGRNDFEGEFEEEAIVKHVRENQLPLVVEFTQESAQKIFGGEVKNHILLFLKKEGGEDTIEKFRGAAEDFKGKVLFIYLDTDNEENGRITEFFGLKDDEIPAVRLIQLAEDMSKYKPESSDLETATIKKFVQDFLDGKLKPHLMSEDVPDDWDAKPVKILVGKNFKEVAMDKSKAVFVEFYAPWCGHCK…	ATGAAGTTTTCATCTTGTTTAGTTTTAACTCTTCTGGTTTTTGTATCTGCCGAAGAAGTCAAACGGGAGGAAGATGTCTACGTTTTGACGACGAAAAATTTTGACTCCTTCATAGCTGATAATGAGTTCGTGCTTGTGGAATTTTATGCTCCCTGGTGTGGCCATTGCAAGGCATTGGCACCAGAATACGCCAAAGCTGCAACAGCTTTGGAGGAACAGAACTTAAACGTCAAGTTGGGCAAAGTGGATGCTACTGTGGAGGACAGTTTGGCCGCCAAATTCGAAGTTCGTGGATACCCAACAATCAAGTTCTTCCGTAAAGACAAGCCTAAGAGTCCAGCAGACTACACTGGTGGTCGCCAATCTGACGATATTATTAACTGGCTGAAGAAGAAGACA…	NA	1	1
OK006_E_296	Other venom-related protein	PDI	PDI-A3	OK006A_TRINITY_DN625_c0_g1_i1_Frame_F3	LLAYFRPSAFTSPATMRRALILFSCIVLAVQASDVLEFTDSNFESKIKELDVALVEFYAPWCGHCKRLAPEYEKAATKLKTSDPPVPLVKVDCTAETKTCQEYGVSGYPTLKIFKGGELTKDYQGPRESNGIISTMLKEAGPASKELEDFKQYEDFIGRGTVCVVGFFEDADSEMAKTFSKLADTNEVDIRFGHTTASAVMDKAKYKDEIVLFRPKAMQNKFEDSAVKFTGDAKKKSAVKEFLTQEHLGMCGIRTINNAGDFSKPTFVAFYDVDYVKNPKGSNYWRNRVMKVGKKLRDEGLKVFFGVSNKEEHSHELGECGLQDAEGDKPIVCAYDEKNRKFKMEEEFSVDSFEKFVRGVLNGEVEPYLKSEPVPENNDQPVKVAVAKNFDELVNDPEK…	CTTCTCGCTTATTTCAGACCATCTGCCTTTACGTCTCCAGCAACGATGCGGCGAGCACTGATTTTATTTTCTTGCATTGTTCTTGCTGTTCAAGCAAGCGATGTTCTTGAATTCACAGATTCAAACTTTGAAAGCAAGATCAAAGAACTTGATGTGGCTCTCGTCGAGTTCTACGCACCGTGGTGCGGTCACTGCAAACGATTAGCACCAGAGTATGAAAAGGCTGCTACAAAACTGAAGACGAGTGACCCTCCCGTGCCTCTTGTAAAGGTGGACTGTACAGCAGAAACCAAGACATGCCAAGAATATGGTGTGAGTGGGTACCCAACCCTGAAGATTTTCAAGGGAGGTGAACTTACCAAAGATTACCAAGGACCCAGAGAATCAAATGGCATTATC…	NA	1	0
OK006_E_297	Other venom-related protein	PDI	PDI-A5	OK006A_TRINITY_DN10305_c0_g1_i1_Frame_F1	MALPWKALLFASFTLLYVIPFRFGAKQNKKDLIIRVDDFKDFKKLLRTRTNLLVIFTQSEKAASKSLALFEEVAEEMRGKATMAYINCGDDKKLCKKLKVYTTTFELKHYKDGEFNKNYDRKLTVKSMVNFLMDPTGDIPWDEDLTATDVVHIDTEDGLNKLLKKDKSAALVMFYAPWCGYCKRLKPDFAAAATEVKGKANLVGIDVDKPHMMGLRTLYNITGFPTLYYFEKGKVKYRYGGENSKEGIVSWLSNPKPPEEPKKEAEWAEEPSEVVHLEDDNFDDYIKEHPSVLVMFYAPWCGHCKKMKPGYTEAAQLIKDQEIPSILAAVDATKHRKLAETYNIKGFPTLKYFKEGEFAFDVNERDKDKIIDFVKDPKEPPPPPAPEPSWEEVDSDVIH…	ATGGCGTTGCCGTGGAAAGCTCTACTGTTCGCAAGTTTCACTTTGCTGTATGTGATTCCTTTCCGGTTTGGGGCCAAGCAGAACAAGAAGGACCTGATCATCCGTGTTGATGATTTCAAGGACTTCAAGAAACTCCTACGGACTCGCACCAACCTCTTGGTGATCTTTACCCAGTCCGAAAAAGCCGCCTCAAAGTCTTTGGCCTTATTTGAAGAAGTGGCTGAAGAGATGAGAGGGAAAGCCACCATGGCATACATTAACTGTGGAGATGATAAAAAGTTGTGCAAAAAGCTGAAGGTTTATACAACAACATTTGAACTGAAGCACTACAAGGATGGAGAATTCAACAAAAACTATGACCGGAAACTGACGGTGAAGTCCATGGTGAACTTTCTGATG…	NA	1	1
OK006_E_298	Other venom-related protein	PDI	PDI-A6	OK006A_TRINITY_DN2798_c0_g1_i1_Frame_R1	MKMTGTGLVLFSLAVAGVSAMYSPSDDVVDLTPTNFHSKVINGDELWIVEFYAPWCGHCQSLAPEWKKAASALKGIVKVGAVNADEHNALGGQYGVRGFPTIKFFGQDKFNPQDYQGQRTAQGIVDFSINQAKSVASARLSGKKSGDSKSKSGGSGKAGDPADVVELTDSNFEKEVLEHDGLVMVEFYAPWCGHCKNLAPQWAKAASELKGKVKLCALDATVHTVMANRYGVRGYPTIKAFPAGKKDGEAEDYDGGRTASDIVQWAMEKAAANIPSPDVYEITSGEVLTDNCEGHQLCIISVLPQIYDCQSECRNNYISILKTLGEKFKKNQWGWLWAEAGAQPALEQSLEVGGFGYPALAAVNTRKMKFSLLRGQFSEKGINEFLRDLSYGKGSTSPL…	ATGAAAATGACAGGAACAGGACTGGTGCTGTTTTCACTGGCGGTAGCAGGAGTGTCAGCGATGTACTCACCTAGTGATGATGTAGTGGACCTGACACCAACCAACTTTCACTCTAAAGTCATCAATGGCGATGAACTGTGGATCGTGGAATTCTATGCTCCATGGTGTGGCCACTGTCAAAGCTTGGCTCCAGAGTGGAAAAAAGCAGCATCAGCTTTGAAGGGAATTGTGAAGGTGGGTGCTGTCAATGCAGATGAGCACAACGCCCTGGGTGGGCAGTATGGAGTGCGGGGCTTCCCCACCATCAAGTTCTTTGGCCAGGACAAGTTCAACCCTCAGGATTACCAGGGCCAACGCACAGCTCAGGGCATTGTGGACTTTAGCATTAACCAGGCCAAG…	NA	1	1

## Sheet: OK193A (ebraeus)
Sequence code	Category	Superfamily	Paralog group	TRINITY CDS name	Transcript	CDS	tpm	Presence of stop codon	Completeness
OK193_E_001	Conotoxin precursor	A	A-1	OK193A_TRINITY_DN100_c1_g2_i1_Frame_F1	MGMRMMFTVFLLVVLATAVVSFTSDRESSHENRRASNRILRGLWVECCANPACRNTHFEHCPVN*	ATGGGCATGCGGATGATGTTCACCGTGTTTCTGTTGGTTGTCTTGGCAACCGCTGTCGTTTCCTTCACTTCAGACCGTGAATCCAGTCATGAGAATCGCAGAGCATCTAACCGGATTCTGCGGGGGTTGTGGGTTGAATGCTGTGCTAATCCTGCTTGTCGGAATACTCATTTTGAGCATTGTCCCGTAAATTAA	9.51368	1	1
OK193_E_002	Conotoxin precursor	A	A-1	OK193A_TRINITY_DN36244_c0_g1_i1_Frame_R1	VLPVTLDRASDGRNAAANAKTPRLIAPFIRDYCCHRGPCMVWCG*	GTTCTTCCAGTCACTTTAGATCGTGCATCTGATGGAAGGAATGCAGCAGCCAACGCCAAAACGCCTCGCCTGATCGCGCCATTCATCAGGGATTATTGCTGTCATAGAGGTCCCTGTATGGTATGGTGTGGTTGA	2.85781	1	0
OK193_E_003	Conotoxin precursor	A	A-1	OK193A_TRINITY_DN6056_c0_g1_i1_Frame_F1	FLLVVLATTVVSFPSDRESDGTNAVARTDEPEEYDELDGNECCRNPDCTSHRCR*	TTTCTGTTGGTTGTCTTGGCAACCACTGTCGTTTCCTTCCCTTCAGATCGTGAATCTGATGGCACGAATGCCGTAGCCCGCACCGACGAGCCTGAGGAGTACGACGAACTGGACGGGAATGAATGCTGTAGGAATCCTGACTGTACGAGCCACAGATGTCGTTGA	3.12823	1	0
OK193_E_004	Conotoxin precursor	A	A-1	OK193A_TRINITY_DN100_c1_g1_i4_Frame_F2	MGMRMTFTVFLLVVLATAVISFSSDRASHGRNAAAKVFDRIALIATRECCANPQCWAKNCR*	ATGGGCATGCGGATGACGTTCACCGTGTTTCTGCTGGTTGTCTTGGCAACCGCTGTCATTTCCTTCAGTTCAGATCGTGCATCTCATGGCAGGAATGCCGCAGCCAAAGTGTTTGACCGGATCGCTCTGATCGCCACACGCGAATGCTGTGCCAATCCTCAATGTTGGGCGAAGAATTGTCGTTGA	39.918	1	1
OK193_E_005	Conotoxin precursor	A	A-2	OK193A_TRINITY_DN100_c1_g1_i7_Frame_F2	MGMRMMFTVFLLVVLATTVVSIPSDRDGKNAAVHERQSWLVPSTITTCCGYSPGTMCPPCMCTNTC*	ATGGGCATGCGGATGATGTTCACCGTGTTTCTGTTGGTTGTCTTGGCAACCACTGTCGTTTCCATCCCTTCAGATCGTGATGGCAAGAATGCCGCAGTCCACGAGAGACAATCTTGGCTGGTCCCTTCGACAATCACGACTTGCTGTGGTTATAGTCCGGGGACAATGTGCCCTCCTTGCATGTGCACTAATACCTGCTAA	7.82095	1	1
OK193_E_006	Conotoxin precursor	A	A-2	OK193A_TRINITY_DN100_c1_g1_i2_Frame_F2	MGMQMKFTVFLLVVLATTVVSIPSDRDGKNAAVHERQSWLVPSTITTCCGYSPGTMCPPCMCTNTC*	ATGGGCATGCAGATGAAGTTCACCGTGTTTCTGTTGGTTGTCTTGGCAACCACTGTCGTTTCCATCCCTTCAGATCGTGATGGCAAGAATGCCGCAGTCCACGAGAGACAATCTTGGCTGGTCCCTTCGACAATCACGACTTGCTGTGGTTATAGTCCGGGGACAATGTGCCCTCCTTGCATGTGCACTAATACCTGCTAA	240.214	1	1
OK193_E_007	Conotoxin precursor	A	A-2	OK193A_TRINITY_DN35833_c0_g1_i1_Frame_F3	VFLLVVLATTVVPITLASATDGRNAAANARVSPVISKFSKKWCHPNPYTVG*	GTGTTTCTGTTGGTTGTCTTGGCAACCACTGTTGTTCCCATCACTTTAGCTAGTGCAACTGATGGAAGGAATGCTGCAGCCAACGCCAGAGTGTCTCCCGTGATCTCTAAATTCAGTAAGAAATGGTGTCATCCGAATCCTTACACTGTGGGGTAA	0.925134	1	0
OK193_E_008	Conotoxin precursor	B1		OK193A_TRINITY_DN22645_c0_g1_i4_Frame_F2	MQLYTHLYLLVPLVTFYLILGTGTLGDGGALTERRSADVTALKPEPVLLQKSAARSTSDNGKDRLTQMRRIFIKRGNTARGYEDDAEDVEYIGDLEEL*	ATGCAGCTGTACACGCATCTGTATCTGCTGGTGCCCCTGGTGACCTTCTACCTAATCCTAGGCACGGGCACGCTAGGTGATGGAGGCGCACTGACTGAACGCCGTTCGGCTGACGTCACAGCGCTGAAACCTGAGCCTGTCCTCCTGCAGAAATCCGCTGCCCGCAGCACCAGCGACAATGGCAAGGACAGGCTGACTCAGATGAGGAGGATTTTCATAAAGCGAGGAAACACGGCCAGAGGCTACGAAGACGATGCAGAGGATGTGGAGTATATTGGAGACCTCGAAGAACTTTGA	44326.9	1	1
OK193_E_009	Conotoxin precursor	B1		OK193A_TRINITY_DN16236_c0_g1_i1_Frame_F3	MQLFTCLCLLVPLMLFFHLTHPVTAGHERAATEVRSADHTLKRFVHHVHQAQKRGPVLSRTSTLQDPHNDDNDNDGDKKRRIDNLSVFLDMKVLAEIMKNQRKKIEEAKANLDHLGR*	ATGCAGCTCTTCACCTGCTTGTGTCTGCTGGTTCCACTCATGCTCTTCTTTCACCTGACCCACCCGGTCACGGCAGGCCACGAAAGGGCCGCCACGGAAGTCCGCTCGGCTGACCACACGCTGAAACGGTTTGTCCACCACGTCCACCAGGCCCAGAAACGTGGACCCGTGCTGTCCAGGACATCCACTCTCCAAGACCCTCACAACGATGACAACGACAACGATGGTGACAAGAAGAGGCGGATAGACAATCTCAGTGTGTTCTTGGATATGAAGGTTTTGGCAGAAATAATGAAGAACCAGAGGAAAAAAATAGAGGAAGCGAAGGCAAATCTGGATCATCTAGGTCGTTGA	0.713226	1	1
OK193_E_010	Conotoxin precursor	B2		OK193A_TRINITY_DN808_c38_g1_i1_Frame_F3	MLRLIIAAVLASACLAFPQRRDGAPANVDPNLQPFGGVIPNMQPMQGMTGMPSPQFLPFNPNFAVGLKRENLEKRRHNPQFSDNNQSPFGSEGDLDSFMNFMKENGNNLPFADVNSAATDLGHFEPSDENEAGKFRFFDKEQ*	ATGTTGCGACTGATAATCGCCGCCGTCCTCGCCTCCGCCTGCCTCGCTTTCCCTCAAAGAAGGGATGGCGCCCCCGCAAACGTCGATCCCAACCTCCAGCCCTTTGGTGGGGTAATACCAAACATGCAGCCCATGCAGGGAATGACCGGAATGCCCAGTCCTCAATTCCTGCCTTTCAACCCTAACTTTGCCGTGGGATTGAAGAGGGAGAACCTAGAGAAGAGGAGACATAACCCTCAGTTCAGCGACAACAACCAATCTCCCTTTGGCTCGGAGGGTGACCTAGACAGCTTCATGAACTTCATGAAGGAAAACGGCAACAACCTTCCTTTCGCGGACGTGAATAGCGCCGCCACCGACCTTGGCCACTTCGAGCCCAGTGACGAAAACGAGGCCGGC…	83624.1	1	1
OK193_E_011	Conotoxin precursor	B2		OK193A_TRINITY_DN10497_c1_g1_i5_Frame_R1	GVIPNMQPMQGMTGMPSPQFLPFNPIFAVGLKRENLEKRRHSPQFSDNNQSPFGSEGDIDSFMNFMKENGNNLPFADVNSAATDLGHFEPSDENEAGKFRSFDKEQ*	GGGGTAATACCAAACATGCAGCCCATGCAGGGAATGACCGGAATGCCCAGTCCTCAATTCCTGCCTTTCAACCCTATCTTTGCCGTGGGATTGAAGAGGGAGAACCTAGAGAAGAGGAGACATAGCCCTCAGTTCAGCGACAACAACCAATCTCCCTTTGGCTCGGAGGGTGACATAGACAGCTTCATGAACTTCATGAAGGAAAACGGCAACAACCTTCCTTTCGCGGACGTGAATAGCGCCGCCACCGACCTTGGCCACTTCGAGCCCAGTGACGAAAACGAGGCCGGCAAGTTCCGCTCCTTTGACAAGGAACAATAA	22.5442	1	0
OK193_E_012	Conotoxin precursor	B2		OK193A_TRINITY_DN11679_c0_g1_i1_Frame_F1	NLQFFGGVLPNMQPMQGMTGMPSPQILPFNPTFAVGLKRENQEKRRHNPQLSDNNQSPFGSEGDLDSFMNFMKENGNNLPFADENSAATDLGHFEPSDENKAGKFRFFDQEQ*	AACCTCCAGTTCTTTGGTGGGGTACTACCAAACATGCAGCCCATGCAGGGGATGACCGGAATGCCCAGTCCTCAAATCCTGCCTTTCAACCCTACCTTTGCCGTGGGATTGAAGAGGGAGAACCAAGAGAAGAGGAGACATAACCCTCAGTTGAGCGACAACAACCAATCTCCCTTTGGCTCGGAGGGTGACCTAGACAGCTTCATGAACTTCATGAAGGAAAACGGCAACAACCTTCCTTTCGCGGACGAGAATAGCGCCGCCACCGACCTTGGCCACTTCGAGCCCAGTGACGAAAACAAGGCCGGCAAGTTCCGCTTCTTTGACCAGGAACAATAA	15.4114	1	0
OK193_E_013	Conotoxin precursor	B2		OK193A_TRINITY_DN5601_c3_g1_i1_Frame_R2	RLIIDAVLASACLAFPQRRDGAPANVDPNLQPFGGVIPNMQPMQGMTGMPRPQFLPFNPNFAVGLKRENLEKRRNNPQFRDNNQSPFGSEGDPDSFMNFVKENGNNLLFADVNSAAIELGHSEPSDENEAGKFRFCDKEQ*	CGACTGATAATCGACGCCGTCCTCGCCTCCGCCTGCCTCGCTTTCCCTCAAAGAAGGGATGGCGCCCCCGCAAACGTCGATCCCAACCTCCAGCCCTTTGGTGGGGTAATACCAAACATGCAGCCCATGCAGGGAATGACCGGAATGCCCAGACCTCAATTCCTGCCTTTCAACCCTAACTTTGCCGTGGGATTGAAGAGGGAGAACCTAGAGAAGAGGAGAAATAACCCTCAGTTCCGCGACAACAACCAATCTCCCTTTGGCTCGGAGGGTGACCCAGACAGCTTCATGAACTTCGTGAAGGAAAACGGCAACAACCTTCTTTTCGCGGACGTGAATAGCGCCGCTATCGAACTTGGCCACTCCGAGCCCAGTGACGAAAACGAGGCCGGCAAGTTC…	22.1303	1	0
OK193_E_014	Conotoxin precursor	B2		OK193A_TRINITY_DN5601_c1_g2_i5_Frame_R2	ENLEKRRHNPQFSDNNQSPFVSEGDLDSFMNIMKENGNNHPFADVNSAATDLGHFESSDENEDGKFRFFDKAQ*	GAGAACCTAGAGAAGAGGAGACATAACCCTCAGTTCAGCGACAACAACCAATCTCCCTTTGTCTCGGAGGGTGACCTAGACAGCTTCATGAACATCATGAAGGAAAACGGCAACAACCATCCTTTCGCGGACGTGAATAGCGCCGCCACCGACCTTGGCCACTTCGAGTCCAGTGACGAAAACGAGGACGGCAAGTTCCGCTTCTTTGATAAGGCACAATAA	10.4153	1	0
OK193_E_015	Conotoxin precursor	B2		OK193A_TRINITY_DN13853_c2_g1_i1_Frame_F1	MQGMTGMPRPQFLPFNHNFAVGFKRENLEKRRHNPQFCDNNQSPFGSVGDLDSFMNFMKENGNNLPFEDVNGAATDLGHFDPSDENEAGKFRFFDKEQ*	ATGCAGGGAATGACCGGAATGCCCCGTCCTCAATTCCTGCCTTTCAACCATAACTTTGCAGTGGGATTTAAGAGGGAGAACCTAGAGAAGAGGAGACATAACCCTCAGTTCTGCGACAACAACCAATCTCCCTTTGGCTCGGTGGGTGACCTAGACAGCTTCATGAACTTCATGAAGGAAAACGGCAACAACCTTCCTTTCGAGGACGTGAATGGCGCCGCCACCGACCTTGGCCACTTCGATCCCAGTGACGAAAACGAGGCCGGCAAGTTCCGCTTCTTTGACAAGGAACAATAA	17.8861	1	1
OK193_E_016	Conotoxin precursor	B2		OK193A_TRINITY_DN15515_c0_g1_i1_Frame_F1	QFLPFNPNFAEGLKRENIEKRRHNPQFSDNNQSPFGSEGDLDGFMNFMKENSNNLPFADGNSAATDLGYFEPRDQKEAGKFRFFD*	CAATTCCTGCCTTTCAACCCTAACTTTGCCGAGGGACTGAAGAGGGAGAACATAGAGAAGAGGAGGCATAACCCTCAGTTCAGCGACAACAACCAATCTCCCTTTGGCTCGGAGGGTGACCTAGACGGCTTCATGAACTTCATGAAGGAAAACAGCAACAACCTTCCTTTCGCGGACGGGAATAGCGCCGCCACCGACCTTGGCTACTTCGAGCCCAGAGACCAAAAAGAGGCCGGCAAGTTCCGATTCTTTGACTAG	9.70715	1	0
OK193_E_017	Conotoxin precursor	B2		OK193A_TRINITY_DN30554_c0_g1_i1_Frame_F1	FPQGRDGAPANVDPNLKPFGGVIPIMQPMQGMTGMPSPQFLPFNPNFAVVLKRENLEKRRHNPQFSYNNQSPFGSEVDLDSFMNFMKENGNLPIANMDGAAAELGKFEPSAEKGQKEGQLRFFDKHQ*	TTCCCTCAAGGAAGGGATGGCGCACCCGCAAACGTCGATCCCAACCTCAAGCCCTTTGGTGGGGTAATACCAATCATGCAGCCCATGCAGGGAATGACTGGAATGCCCAGTCCTCAATTCCTGCCTTTCAACCCTAACTTTGCCGTGGTATTGAAGAGGGAGAACCTAGAGAAGAGGAGACATAACCCTCAGTTCAGCTACAACAACCAATCTCCCTTTGGCTCGGAGGTTGACCTTGACAGCTTCATGAACTTCATGAAGGAAAACGGCAACCTTCCAATAGCAAACATGGACGGCGCCGCTGCTGAACTTGGCAAATTCGAGCCCAGCGCCGAAAAAGGGCAGAAGGAGGGCCAGTTGCGCTTCTTTGACAAGCATCAATAA	1.91057	1	0
OK193_E_018	Conotoxin precursor	B2		OK193A_TRINITY_DN5601_c4_g1_i1_Frame_R2	MLRLITAAVLVSACLAYPQKRDGAPADTANLQGFGQPMPAMPNMQGMQMPVMPMPGMQNPFLPLGTGFKRDLDENLEKRKHHSKFNEGNRGSEADPESFMNFMKGNGDNFPFANMDSADTADLGNFQPSENEDGKFRFFDKQQ*	ATGTTGCGACTGATAACCGCCGCCGTGCTCGTCTCCGCCTGCCTCGCTTACCCGCAAAAAAGAGATGGCGCCCCCGCAGACACGGCCAACCTCCAGGGCTTTGGTCAGCCAATGCCGGCCATGCCCAACATGCAGGGAATGCAAATGCCGGTAATGCCAATGCCGGGAATGCAGAATCCATTCCTGCCTCTCGGCACGGGATTCAAGAGGGATCTGGATGAGAACCTAGAGAAGAGGAAGCACCACTCGAAGTTCAACGAGGGCAACAGAGGCTCAGAGGCTGACCCAGAAAGCTTCATGAACTTCATGAAGGGAAACGGCGACAACTTCCCGTTCGCGAACATGGATAGCGCCGACACTGCTGACCTTGGCAACTTCCAGCCCAGCGAAAACGAGGAT…	2.31486	1	1
OK193_E_019	Conotoxin precursor	C		OK193A_TRINITY_DN4613_c0_g1_i7_Frame_R2	MQTAYWVVMGMMMVWITAPLSGGGKLNDVIRGLVPDDLTLQRMFKSLFSHRLSGGRNSTVHICMWKVCPPPPWRRPHGKR*	ATGCAGACGGCCTACTGGGTGGTGATGGGGATGATGATGGTGTGGATTACAGCCCCTCTGTCTGGAGGTGGTAAACTGAACGACGTAATTCGGGGTTTGGTGCCAGACGACTTAACCCTACAGCGTATGTTCAAAAGTCTGTTTTCCCATCGTCTTTCTGGCGGCAGAAATTCGACGGTACACATATGTATGTGGAAGGTATGTCCACCTCCCCCATGGAGACGACCACATGGAAAAAGATGA	432.362	1	1
OK193_E_020	Conotoxin precursor	C		OK193A_TRINITY_DN4613_c0_g1_i8_Frame_R2	MQTAYWVVMGMMMVWITAPLSGGGKLNDVIRGLVPDDLTLQRMFKSLFSHRLSDGRNLTVYMCTWKICPPSPWRRPHGKR*	ATGCAGACGGCCTACTGGGTGGTGATGGGGATGATGATGGTGTGGATTACAGCCCCTCTGTCTGGAGGTGGTAAACTGAACGACGTAATTCGGGGTTTGGTGCCAGACGACTTAACCCTACAGCGTATGTTCAAAAGTCTGTTTTCCCATCGTCTTTCTGACGGCAGAAATTTGACGGTATACATGTGTACCTGGAAGATATGTCCACCTTCCCCATGGAGACGACCACATGGAAAAAGATGA	15.6691	1	1
OK193_E_021	Conotoxin precursor	C		OK193A_TRINITY_DN4613_c0_g1_i12_Frame_R3	MQTAYWVVMGMMMVWITAPLSGGGKLNDVIRGLVPDDLTLQRMFKSLFSHRLSGGTYSRVDTCIWKVCPQSP*	ATGCAGACGGCCTACTGGGTGGTGATGGGGATGATGATGGTGTGGATTACAGCCCCTCTGTCTGGAGGTGGTAAACTGAACGACGTAATTCGGGGTTTGGTGCCAGACGACTTAACCCTACAGCGTATGTTCAAAAGTCTGTTTTCCCATCGTCTTTCTGGCGGCACATATTCGAGGGTAGACACATGTATCTGGAAGGTATGTCCACAATCTCCATAG	127.818	1	1
OK193_E_022	Conotoxin precursor	Con-ikot-ikot	Con-ikot-ikot-2	OK193A_TRINITY_DN17734_c2_g1_i4_Frame_R2	MAMNMWMTISECVVVVMATTVVGSTPLQERGLSLDERRAIGCCAWQVYDCLVQRGHYWYICYSWASWICTRGLSDRCCPGLERCIRRCVSGYKIVCYYLCIFESC*	ATGGCCATGAACATGTGGATGACGATCAGCGAGTGTGTAGTGGTTGTCATGGCGACCACTGTCGTTGGCTCCACTCCGTTACAAGAACGAGGCCTCAGCCTCGATGAACGCCGTGCCATTGGATGTTGCGCCTGGCAAGTTTATGACTGTCTCGTACAACGGGGGCACTATTGGTATATTTGCTACAGCTGGGCCTCCTGGATTTGTACACGTGGCCTTTCTGATAGATGTTGCCCTGGACTTGAGCGCTGTATTCGAAGATGCGTGTCGGGCTATAAAATCGTCTGCTATTACCTCTGCATATTTGAAAGTTGCTGA	46890.8	1	1
OK193_E_023	Conotoxin precursor	Con-ikot-ikot	Con-ikot-ikot-4	OK193A_TRINITY_DN531_c0_g1_i16_Frame_R1	MAMNVWMTISVFVVVVMATTVIGSTVSHEQKRDRSSRKCCATKAYQCLRDHKCFEPIDYKCGQPCKNTDTTSCRPTAGDNCCMIYKHCLVDCQIFRSDRRGDQLLYCYELCSDSYPC*	ATGGCCATGAACGTGTGGATGACGATCAGCGTGTTTGTAGTGGTTGTCATGGCAACCACTGTCATTGGCTCCACTGTATCACATGAACAAAAACGCGACCGCAGCAGCAGAAAATGTTGCGCCACAAAAGCATACCAATGTCTTCGAGATCATAAATGCTTTGAACCGATTGATTACAAGTGTGGGCAACCGTGCAAAAATACAGATACTACAAGCTGTAGACCTACTGCTGGTGACAACTGTTGCATGATTTACAAGCACTGTCTGGTGGACTGCCAGATTTTTCGTTCAGATAGACGCGGAGATCAACTGCTTTACTGCTATGAACTTTGCAGCGACTCGTACCCTTGTTAG	1624.51	1	1
OK193_E_024	Conotoxin precursor	Conkunitzin	Conkunitzin-3	OK193A_TRINITY_DN1180_c0_g1_i6_Frame_R1	MEGRGLAVVLILTSCLCALTVGDKRSVPDVCLQPMVVGSCRGKFTRYYFNSCLGMCQPFDYGGCDGNGNRFKTMDACLNKCEIPWERIQGD*	ATGGAGGGACGTGGTTTGGCTGTTGTTCTGATTCTGACCAGTTGTCTGTGTGCCTTGACTGTTGGCGATAAGAGATCAGTACCTGACGTGTGCCTTCAACCCATGGTGGTTGGGTCGTGCAGAGGCAAATTCACACGCTATTACTTCAACAGCTGTTTAGGCATGTGCCAGCCGTTCGATTACGGGGGATGTGACGGCAACGGAAACAGATTTAAGACCATGGATGCGTGCCTGAATAAATGCGAAATCCCGTGGGAGCGAATTCAAGGTGACTGA	1.9582	1	1
OK193_E_025	Conotoxin precursor	Conkunitzin	Conkunitzin-5	OK193A_TRINITY_DN19735_c0_g1_i1_Frame_F2	MATFNIVLAALFASVILVDFAVQARRCHPPCEYGERCVSANRRERRHRHNNVCVPVRCLFQARRGRCLNFDRRYHFNTLTMSCTRVHTGACYGRNNRFSSSENCELTCAPRR*	ATGGCCACTTTCAACATCGTCCTCGCTGCTTTGTTCGCTTCTGTTATCCTTGTCGACTTTGCTGTTCAGGCAAGACGGTGCCACCCGCCATGCGAATACGGGGAACGTTGTGTATCTGCCAACAGGCGAGAGAGAAGACACCGCCACAACAATGTCTGTGTGCCTGTACGCTGCCTGTTCCAAGCCCGTCGGGGCCGCTGCCTCAACTTCGATCGTCGCTACCACTTCAACACCTTGACCATGAGCTGCACGCGCGTGCACACGGGCGCCTGCTACGGCCGCAACAACCGCTTCAGCTCCAGCGAGAACTGCGAACTGACCTGCGCCCCGAGACGATGA	0.772608	1	1
OK193_E_026	Conotoxin precursor	Conkunitzin	Conkunitzin-9	OK193A_TRINITY_DN3208_c1_g1_i2_Frame_F1	MDARRVVAVLLVLSMARSVTGKDPRCYEPLDSGDSRGPTQSTRFYYNQEKKKCQTFQCTECGGNGNNFPDLYACKECCEWDMTCY*	ATGGACGCACGTCGTGTAGTTGCCGTTCTCCTGGTTCTCTCCATGGCCCGCTCTGTGACAGGAAAAGATCCGAGGTGCTACGAGCCCTTGGATTCGGGGGATTCCAGGGGCCCTACCCAAAGCACAAGGTTCTATTACAACCAAGAAAAAAAGAAATGTCAAACCTTTCAGTGCACTGAATGTGGAGGCAACGGCAACAACTTTCCCGATCTCTATGCCTGTAAAGAATGTTGCGAGTGGGACATGACTTGTTATTAA	2571.58	1	1
OK193_E_027	Conotoxin precursor	Conkunitzin	Conkunitzin-12	OK193A_TRINITY_DN1701_c0_g1_i1_Frame_F3	MDALRFSAVLLILAMACFITVSAGACEKPKVEGTGSQSISSYFFNSASGTCDTFVYKGGNDDPFPNRFNSHPVCENVCKCKLRMDPGTGERLRTRYYHNTDGSRCLPFQYRGTGGNANNFLSESACEMECEL*	ATGGACGCACTACGTTTTTCTGCCGTTCTTCTGATTCTGGCCATGGCCTGCTTTATAACAGTGTCGGCAGGGGCTTGCGAAAAACCCAAGGTCGAAGGAACCGGGAGTCAAAGTATCAGCAGTTACTTCTTCAACAGTGCTAGCGGCACGTGCGACACGTTTGTCTACAAAGGAGGAAACGACGACCCGTTCCCCAATAGGTTTAACAGCCATCCCGTCTGTGAGAATGTTTGCAAGTGCAAACTAAGGATGGATCCGGGGACAGGCGAAAGACTCCGAACCAGGTATTATCACAACACTGACGGCAGCAGGTGCCTACCTTTTCAGTACCGAGGAACTGGAGGCAACGCGAACAACTTTCTTTCGGAGTCGGCATGTGAGATGGAGTGCGAGTTATAG	10.0788	1	1
OK193_E_028	Conotoxin precursor	D	D-1	OK193A_TRINITY_DN2521_c0_g1_i1_Frame_F1	MPRLEMMLLVLLILPLPYFNAAGGQAVPGDGQGDGLDSYLLRGDRAVYRACYYHQPNSPWGRCCPTKMCGSKCCDRANCRCVSHADRGQGCSC*	ATGCCAAGACTGGAAATGATGCTGCTGGTTCTGCTGATTTTGCCTCTGCCCTATTTTAATGCGGCAGGGGGACAAGCGGTACCAGGGGACGGGCAAGGCGATGGATTGGACAGTTACCTCCTACGTGGTGACAGAGCCGTTTATAGGGCGTGCTACTATCATCAACCAAACTCACCATGGGGACGGTGCTGCCCGACCAAGATGTGCGGTAGTAAGTGCTGTGACCGGGCGAACTGCCGCTGCGTCTCTCATGCAGACAGGGGACAGGGGTGTTCCTGCTGA	292.154	1	1
OK193_E_029	Conotoxin precursor	D	D-2	OK193A_TRINITY_DN3492_c0_g1_i1_Frame_F2	MPKLEMMLLVLLILPLCYIDAVGPPPPWNMEDEIIEHWQKLHCHEISDLTPWILCSPEPLCGGKGCCAQEVCDCSGPACTCPPCL*	ATGCCGAAACTAGAGATGATGCTGCTGGTTCTGCTGATTTTGCCCCTGTGCTATATTGATGCGGTAGGACCACCGCCACCATGGAACATGGAAGATGAAATTATTGAACATTGGCAAAAGCTTCATTGTCATGAAATTTCAGATCTCACACCATGGATACTGTGCAGCCCGGAACCACTTTGCGGTGGAAAAGGCTGCTGTGCCCAGGAAGTCTGCGACTGCTCTGGACCAGCTTGTACATGCCCGCCATGTCTATAG	5.84751	1	1
OK193_E_030	Conotoxin precursor	E	E-1	OK193A_TRINITY_DN14358_c0_g1_i1_Frame_R2	MTRVFIAMFFLLALTEGWPRLYDRDCERGRNMHYRCKQLEQCGIIRKKDGKLTCELRCSCKPGKSCLHGENIDWDDMTTKIYHCPWP*	ATGACGCGTGTGTTCATTGCGATGTTCTTCCTCTTGGCGCTAACAGAGGGATGGCCACGTCTGTATGATAGGGACTGTGAGAGGGGGCGAAATATGCATTACAGGTGCAAACAATTAGAGCAGTGTGGGATCATTCGTAAGAAGGACGGAAAATTGACGTGCGAGCTGAGATGTAGCTGTAAACCTGGAAAAAGCTGTCTTCACGGTGAAAACATCGATTGGGATGACATGACTACCAAAATCTACCACTGCCCGTGGCCCTAG	2.65681	1	1
OK193_E_031	Conotoxin precursor	E	E-1	OK193A_TRINITY_DN32004_c0_g1_i1_Frame_R3	KKNILRTYCSNKICGEATKNTNGELQCTMYCRCANGCFRGQYIDWPNQQTNLLFC*	AAGAAAAACATACTGCGCACCTACTGCTCAAATAAGATATGTGGAGAGGCAACGAAGAATACGAATGGGGAACTTCAGTGCACCATGTACTGTCGGTGTGCAAACGGCTGTTTTCGCGGTCAATACATCGATTGGCCCAATCAGCAGACCAATCTCCTCTTCTGCTAG	1.48487	1	0
OK193_E_032	Conotoxin precursor	E	E-2	OK193A_TRINITY_DN38277_c0_g1_i1_Frame_F3	MMTRVFFAMFFLMALTEGWPRLYDRDCARGRNMHITCFKDQTCGLTVKRNGRLNCSLTCSCRRGESCLHGEYIDWDSRGLKVHICPKPWF*	ATGATGACACGTGTGTTCTTTGCGATGTTCTTCCTCATGGCACTAACAGAGGGATGGCCACGTCTGTATGATAGGGACTGTGCGAGGGGGCGTAATATGCATATCACGTGCTTTAAAGATCAGACATGTGGATTGACTGTAAAGCGGAACGGAAGATTGAACTGCAGCCTGACCTGTAGCTGTAGACGTGGAGAAAGCTGTCTTCACGGTGAATACATCGATTGGGATAGCAGGGGTCTCAAAGTGCACATCTGCCCGAAACCCTGGTTTTAA	2.71345	1	1
OK193_E_033	Conotoxin precursor	F	F-1	OK193A_TRINITY_DN454_c6_g1_i1_Frame_F1	MQRGAMLLGVVAFLALWSQAAAEEYDLNDPDVLAIVDEGQKLMHACSIANKYTYDPWWKLNILAFKEMRVYHSMMSDMVTCLNHFFRRRHGEH*	ATGCAGAGAGGGGCCATGCTGCTTGGGGTGGTCGCCTTCCTTGCCCTGTGGTCCCAGGCCGCTGCCGAGGAGTACGATTTGAACGATCCTGATGTGTTGGCCATAGTCGACGAGGGACAGAAATTGATGCACGCCTGTTCCATTGCCAATAAATACACATACGACCCATGGTGGAAGTTGAACATTTTGGCCTTTAAAGAAATGAGAGTATACCATTCAATGATGAGCGATATGGTAACCTGCCTGAACCATTTTTTCCGGAGAAGACATGGAGAACATTAA	18454.4	1	1
OK193_E_034	Conotoxin precursor	F	F-1	OK193A_TRINITY_DN454_c6_g1_i3_Frame_F1	MQRGAMLLGVVAFLALWSQAAADVYDLNDPDVLAVVDEGQKLMHACSIANKYTYDPWWKLNILAFKEMRVYHSMMSDMVTCLNHFFRRRHGEH*	ATGCAGAGAGGGGCCATGCTGCTTGGGGTGGTCGCCTTCCTTGCCCTGTGGTCCCAGGCCGCTGCCGATGTGTATGATTTGAACGATCCTGACGTGTTGGCCGTGGTCGACGAGGGACAGAAATTGATGCACGCCTGTTCCATTGCCAATAAATACACATACGACCCATGGTGGAAGTTGAACATTTTGGCCTTTAAAGAAATGAGAGTATACCATTCAATGATGAGCGATATGGTAACCTGCCTGAACCATTTTTTCCGGAGAAGACATGGAGAACATTAA	28450.6	1	1
OK193_E_035	Conotoxin precursor	F	F-1	OK193A_TRINITY_DN19603_c0_g1_i1_Frame_F1	VFLALWSQSAAEEYDLNDPDVLDIVDEGQKLMHACSISNKYTYDPWWKLNILAFKEMRVYHSMMSDMVTCLNHFSRRRHEEH*	GTCTTCCTTGCCCTGTGGTCCCAGTCCGCTGCCGAGGAGTACGATTTGAACGATCCTGACGTGTTGGACATAGTCGACGAGGGACAGAAATTGATGCACGCCTGTTCCATTTCCAATAAATACACATACGACCCATGGTGGAAGTTGAACATTTTGGCCTTTAAAGAAATGAGAGTATACCATTCAATGATGAGCGATATGGTAACCTGCCTGAACCATTTTTCCCGGAGAAGACATGAAGAACATTAA	15577.3	1	0
OK193_E_036	Conotoxin precursor	F	F-1	OK193A_TRINITY_DN16771_c0_g1_i1_Frame_R3	IDEEQKMMHACSIANKYTYDPWCKLNILAFKKMRVYHSMMSDMVTCLNHFPRRRHE*	ATCGACGAGGAACAGAAAATGATGCACGCCTGTTCCATTGCCAATAAATACACATACGACCCATGGTGTAAGTTGAACATTTTGGCCTTTAAAAAAATGAGAGTATACCATTCAATGATGAGCGATATGGTAACCTGCCTGAACCATTTTCCCCGGAGAAGACATGAATAA	14.2317	1	0
OK193_E_037	Conotoxin precursor	F	F-1	OK193A_TRINITY_DN24835_c1_g1_i1_Frame_R2	PTLWSQAAAEEYDLNDPDVLAIVDEGQKLMHACSVASKYTYDPWGKLNILDFKEMRVYHSMMSDMVTCLNHFFPEKTWRT*	CCTACCCTGTGGTCCCAGGCTGCGGCCGAGGAGTACGATTTGAACGATCCTGACGTGTTGGCCATAGTCGACGAGGGACAGAAATTGATGCACGCCTGTTCCGTTGCCAGTAAATACACATACGACCCATGGGGGAAGTTGAACATTTTGGACTTTAAAGAAATGAGAGTATACCATTCAATGATGAGCGATATGGTAACCTGCCTGAACCATTTTTTTCCGGAGAAGACATGGAGAACATAA	23.0904	1	0
OK193_E_038	Conotoxin precursor	H	H-1a	OK193A_TRINITY_DN15_c0_g1_i41_Frame_F2	MNSAGRLLLLCLALGLVFESLGIPVADDVKADRDTDPGDKDARGFYYWRAQVDCGGTLCEFGCCKPINGEDECRELDCD*	ATGAACTCCGCTGGCCGTCTCCTGCTTCTGTGCCTAGCTCTGGGCCTGGTGTTCGAGTCTCTGGGAATACCCGTGGCTGATGACGTAAAAGCTGACAGAGACACCGATCCTGGCGACAAAGATGCAAGGGGTTTTTACTACTGGAGGGCCCAGGTGGATTGCGGCGGTACGCTATGTGAGTTCGGCTGCTGTAAACCAATCAACGGGGAAGACGAATGCAGAGAGCTTGATTGTGATTAG	1540.3	1	1
OK193_E_039	Conotoxin precursor	H	H-1a	OK193A_TRINITY_DN13593_c0_g1_i1_Frame_R2	FESLGIPVADDVEADRDTDPDDGDPRGRNSWRSTDCNGVPCQFGCCVTINGNDECRELDC*	TTCGAGTCTCTGGGAATACCCGTGGCTGATGACGTAGAAGCTGACAGAGACACAGATCCTGACGACGGAGATCCAAGGGGTCGTAACTCCTGGAGGTCCACGGATTGCAACGGTGTACCATGCCAGTTCGGCTGCTGCGTTACAATCAACGGGAATGATGAATGCAGGGAACTTGATTGTTAG	3.57177	1	0
OK193_E_040	Conotoxin precursor	H	H-1a	OK193A_TRINITY_DN10211_c0_g1_i1_Frame_R3	LGLVFELLGIPVADDVEADRDADPDNGDPRGRISWRIEEDCGYVPCQFGCCRIIDGKEKCREIDCY*	CTGGGCCTGGTGTTCGAGTTGCTGGGAATACCCGTGGCTGATGACGTAGAAGCTGACAGAGACGCAGATCCTGACAACGGAGATCCAAGGGGTCGTATCTCCTGGAGGATCGAGGAGGATTGCGGCTATGTACCATGTCAGTTCGGCTGCTGCAGAATAATCGACGGGAAAGAGAAATGCAGGGAAATTGACTGTTACTGA	2.35248	1	0
OK193_E_041	Conotoxin precursor	H	H-2a	OK193A_TRINITY_DN842_c1_g1_i3_Frame_F2	MRTNGRLLFLCLAVGLLLESQAHPIADAGDATRNVGSDGTSVELSKTIERGQVSSAEKGLEKASAHGRDIVYIVYKPDHDVPFPN*	ATGAGGACTAACGGCCGACTCCTGTTTCTGTGCCTTGCTGTGGGACTGCTGTTGGAGTCTCAGGCACACCCCATTGCGGATGCTGGAGATGCTACCAGAAACGTGGGTTCTGACGGAACATCAGTGGAGCTGTCAAAGACGATTGAAAGAGGGCAAGTTTCGTCAGCTGAGAAAGGACTGGAAAAGGCCAGTGCTCATGGTCGTGACATTGTCTACATTGTCTATAAACCTGACCATGACGTACCTTTTCCAAATTAA	670.604	1	1
OK193_E_042	Conotoxin precursor	H	H-2a	OK193A_TRINITY_DN5376_c0_g1_i1_Frame_F2	LFLCLAVGLLLESQAHPIANDGDATRNVGSDGISVELPKMIERGQDSGQEKASAHGRGIVYVLYAPDHDIPFPH*	CTGTTTCTGTGCCTTGCTGTGGGACTGCTGTTGGAGTCTCAGGCACACCCCATTGCTAATGATGGCGATGCAACCCGAAACGTGGGTTCTGACGGAATATCAGTGGAGCTGCCAAAGATGATTGAAAGAGGGCAAGATTCAGGACAAGAAAAGGCCAGTGCTCATGGTCGTGGCATTGTCTACGTTTTATATGCACCTGACCATGACATACCTTTTCCACATTAA	2.33968	1	0
OK193_E_043	Conotoxin precursor	H	H-2b	OK193A_TRINITY_DN15_c0_g1_i25_Frame_F1	MRTSSQLLFLCVSMGLVFALLGHPIADVRDAAGGADSEERSMQGSQTVEGKEASSSERGVLNCDSPSGEC*	ATGAGAACCAGCAGCCAACTCCTGTTTCTCTGCGTCTCTATGGGACTGGTGTTTGCGCTTCTGGGACATCCCATTGCTGATGTCAGAGACGCTGCCGGAGGCGCAGATTCGGAAGAGAGATCCATGCAGGGATCTCAAACCGTTGAAGGAAAAGAGGCGTCATCGTCTGAGAGGGGGGTCCTGAACTGCGATAGCCCATCGGGCGAATGCTAG	7073.66	1	1
OK193_E_044	Conotoxin precursor	I1	I1-1	OK193A_TRINITY_DN408_c0_g1_i8_Frame_R3	MKLALTFLLILMILPLMTGVKKSGDRERRSVKSMRDVFRDHRQFKCVEGGENCRADSNCCSRVCCQLSTGKRCAFKQTVGCDDIHLN*	ATGAAGTTGGCTCTGACATTTCTTCTGATTCTGATGATTCTGCCCTTGATGACTGGGGTGAAGAAGTCTGGTGACCGTGAGCGGAGGAGTGTTAAATCAATGAGAGATGTCTTTCGTGATCATCGGCAATTCAAGTGCGTCGAGGGCGGAGAAAACTGTCGAGCGGACAGCAACTGCTGTAGCCGTGTATGCTGTCAGTTATCGACAGGGAAACGATGCGCATTTAAACAAACAGTGGGTTGCGATGACATCCATCTCAATTAG	3550.51	1	1
OK193_E_045	Conotoxin precursor	I1	I1-2	OK193A_TRINITY_DN28327_c0_g1_i1_Frame_F3	LPSVTGEKSSERTLSGAALRDEWGTCSHIRQGCKHDSDCCGHLCCTGKSCVMTIMPCNLFPF*	CTGCCGTCAGTGACTGGGGAGAAGTCTAGCGAGCGTACACTGAGTGGTGCTGCTCTGAGAGACGAATGGGGAACGTGCTCACACATACGACAAGGATGCAAACATGATTCCGACTGCTGTGGGCATTTGTGTTGTACCGGCAAATCGTGCGTTATGACTATCATGCCATGTAATTTGTTTCCCTTCTAG	1.36785	1	0
OK193_E_046	Conotoxin precursor	I2	I2-1	OK193A_TRINITY_DN78_c0_g2_i1_Frame_R2	MMFRLTSVSCFLLVIVLLNLAVLTDAYRRKECSTNGDCDSTFAVCCNGVCVSNCEERRRRQVPLKLFGQR*	ATGATGTTTCGATTGACGTCAGTCAGCTGTTTCCTGCTGGTCATTGTTCTTCTGAACTTGGCTGTGCTTACCGATGCCTATCGCCGTAAAGAATGCTCAACAAATGGCGATTGCGATAGCACTTTTGCGGTGTGCTGCAACGGGGTTTGCGTATCAAATTGTGAAGAGAGGAGGCGACGCCAAGTTCCGTTGAAATTATTTGGCCAACGTTGA	9048.06	1	1
OK193_E_047	Conotoxin precursor	I3		OK193A_TRINITY_DN1370_c0_g1_i5_Frame_F2	MKLFWAIVVILMLLPLRTGVETSDNHASRSATALRDRLLRPKECLNDLDTCQNTSQCCGDSCCVTAGYCLNMCNDN*	ATGAAGCTGTTTTGGGCGATCGTTGTTATTCTGATGCTTCTACCCTTACGCACCGGAGTGGAGACGTCTGACAACCATGCAAGCCGGAGTGCCACTGCACTGAGAGACAGGCTTCTTCGTCCGAAAGAATGCTTAAACGACCTTGATACCTGCCAGAATACCAGCCAGTGCTGTGGAGATAGCTGTTGTGTCACCGCCGGTTACTGCTTGAACATGTGTAATGACAATTGA	6495.05	1	1
OK193_E_048	Conotoxin precursor	I3		OK193A_TRINITY_DN1370_c0_g1_i12_Frame_F3	MKLFLAIVVILMLLPLRTGVETSDNHASRSATALRDRLLRPKECLNDLDTCQNTSQCCGDSCCVTAGYCLNMCNDN*	ATGAAGCTGTTTTTGGCGATCGTTGTTATTCTGATGCTTCTACCCTTACGCACCGGAGTGGAGACGTCTGACAACCATGCAAGCCGGAGTGCCACTGCACTGAGAGACAGGCTTCTTCGTCCGAAAGAATGCTTAAACGACCTTGATACCTGCCAGAATACCAGCCAGTGCTGTGGAGATAGCTGTTGTGTCACCGCCGGTTACTGCTTGAACATGTGTAATGACAATTGA	5420.78	1	1
OK193_E_049	Conotoxin precursor	I3		OK193A_TRINITY_DN32_c0_g1_i8_Frame_R2	GGETSDNHAIRNATALRDRLLGPKESKCQNAQGNCRDDSDCCGWLCCTGQSSGCAVTTMNCKEQPVQ*	GGAGGGGAGACGTCTGACAACCATGCAATCCGGAATGCCACTGCACTGAGAGACAGGCTTCTTGGTCCAAAGGAATCGAAATGCCAAAATGCGCAAGGGAACTGTAGGGATGATAGCGATTGCTGTGGATGGCTGTGTTGTACCGGGCAGTCCAGTGGATGCGCTGTCACAACCATGAACTGCAAGGAACAACCTGTCCAATGA	2624.61	1	0
OK193_E_050	Conotoxin precursor	I3		OK193A_TRINITY_DN1370_c0_g1_i7_Frame_F2	MKLFWAIVVILMLLPLRTGVETSDNHASRSATALTDLLLRHEQCCGYLDKCENTTQCCEGYSCVTAHYCDRN*	ATGAAGCTGTTTTGGGCGATCGTTGTTATTCTGATGCTTCTACCCTTACGCACCGGAGTGGAGACGTCTGACAACCATGCAAGCCGGAGTGCCACTGCACTGACAGACTTGCTTCTTCGTCATGAACAGTGCTGCGGATATCTTGATAAATGCGAGAATACCACCCAGTGCTGTGAAGGTTACTCTTGTGTCACCGCCCATTACTGCGATAGGAATTAA	3603.78	1	1
OK193_E_051	Conotoxin precursor	K		OK193A_TRINITY_DN6669_c0_g1_i1_Frame_F1	MNMRMMLTLFVLVVVTTVSTSEHEAKKRHPCDVSVEGCLNWCKELPYLRHDKCCRFVDSIPDLSDGECKKLET*	ATGAACATGCGGATGATGCTCACATTGTTCGTGCTGGTTGTCGTGACAACTGTCTCCACTTCAGAGCATGAAGCCAAGAAACGGCACCCTTGTGATGTGTCAGTGGAGGGTTGTTTAAACTGGTGTAAAGAGCTCCCTTACCTCCGTCACGACAAATGTTGTCGGTTCGTTGACAGCATACCTGATCTGTCGGATGGTGAATGTAAAAAACTGGAAACCTAA	10.3992	1	1
OK193_E_052	Conotoxin precursor	M	M-1	OK193A_TRINITY_DN11210_c0_g1_i2_Frame_F3	MMSKLGVLLTICLLLFPITGLPLDEDQPADLPALRTQDFEPEHSPWFDPVRRCCSQNCLTCIPCCPY*	ATGATGTCTAAACTGGGGGTCTTGTTGACCATCTGTCTGCTTCTGTTTCCAATTACTGGGCTTCCGCTGGATGAAGATCAACCTGCTGATCTACCTGCATTGCGTACGCAGGACTTTGAACCTGAGCATAGTCCCTGGTTTGATCCCGTCAGACGGTGCTGCTCGCAGAATTGCTTGACGTGCATCCCTTGTTGCCCATACTGA	2.27022	1	1
OK193_E_053	Conotoxin precursor	M	M-1	OK193A_TRINITY_DN1080_c3_g1_i1_Frame_R1	EDQPADLPAERMQDIATEQHPLFDPVKRCCAQPCYMGCIPCCF*	GAAGATCAACCTGCAGACCTACCTGCAGAGCGTATGCAGGACATTGCAACTGAACAGCATCCCTTGTTTGATCCTGTCAAACGGTGTTGCGCGCAGCCATGCTACATGGGATGCATCCCTTGTTGCTTCTAA	37.3523	1	0
OK193_E_054	Conotoxin precursor	M	M-2	OK193A_TRINITY_DN2928_c0_g1_i8_Frame_R3	MMSKLRILLTICLLLFPLTAVPLDGDQPADRPAERMQDDISSEHHRFFDPVKRCCRLACGLGCHPCCG*	ATGATGTCTAAACTGAGAATCTTGTTGACCATCTGTCTACTTCTATTTCCCCTTACTGCTGTTCCGCTGGATGGAGATCAACCTGCAGACCGACCTGCAGAGCGTATGCAGGACGACATTTCATCTGAACATCATCGCTTTTTTGATCCCGTCAAACGGTGTTGCAGGTTAGCATGCGGCCTGGGATGCCACCCTTGTTGTGGATGA	6.4405	1	1
OK193_E_055	Conotoxin precursor	M	M-2	OK193A_TRINITY_DN2928_c0_g1_i10_Frame_R3	MMSKLRILLTICLLLFPLTAVPLDGDQPADRPAERMQDDISSEHHRFFDPVKRCCAPSACRLGCRPCCRL*	ATGATGTCTAAACTGAGAATCTTGTTGACCATCTGTCTACTTCTATTTCCCCTTACTGCTGTTCCGCTGGATGGAGATCAACCTGCAGACCGACCTGCAGAGCGTATGCAGGACGACATTTCATCTGAACATCATCGCTTTTTTGATCCCGTCAAACGGTGTTGCGCCCCGTCAGCATGCCGCCTCGGATGCAGGCCTTGTTGTAGGTTGTAG	2.44976	1	1
OK193_E_056	Conotoxin precursor	M	M-2	OK193A_TRINITY_DN2928_c0_g1_i4_Frame_R3	MMSKLRILLTICLLLFPLTAVPLDGDQPADRPAERMQDDISSEHHPRFGSGKRCCNASACIVGCRPCCL*	ATGATGTCTAAACTGAGAATCTTGTTGACCATCTGTCTACTTCTATTTCCCCTTACTGCTGTTCCGCTGGATGGAGATCAACCTGCAGACCGACCTGCAGAGCGTATGCAGGACGACATTTCATCTGAACATCATCCCCGTTTTGGTTCCGGCAAAAGGTGTTGCAACGCGTCAGCATGCATCGTCGGATGCAGGCCTTGTTGTTTATGA	1.40531	1	1
OK193_E_057	Conotoxin precursor	M	M-2	OK193A_TRINITY_DN2928_c0_g1_i11_Frame_R3	MMSKLRILLTICLLLFPLTAVPLDGDQPADRPAERMQDDISSERHPMFDAVRDCCPLPACPFGCEPCCG*	ATGATGTCTAAACTGAGAATCTTGTTGACCATCTGTCTACTTCTATTTCCCCTTACTGCTGTTCCGCTGGATGGAGATCAACCTGCAGACCGACCTGCAGAGCGTATGCAGGACGACATTTCATCTGAACGTCATCCCATGTTTGATGCCGTCAGAGATTGTTGCCCGTTGCCGGCATGCCCCTTTGGATGCGAGCCTTGTTGTGGATGA	4.21592	1	1
OK193_E_058	Conotoxin precursor	M	M-2	OK193A_TRINITY_DN2928_c0_g1_i1_Frame_R3	MMSKLRILLTICLLLFPLTAVPLDGDQPADRPAERMQDDISSERHPMFDAVRDCCPLPACPFGCNPCCG*	ATGATGTCTAAACTGAGAATCTTGTTGACCATCTGTCTACTTCTATTTCCCCTTACTGCTGTTCCGCTGGATGGAGATCAACCTGCAGACCGACCTGCAGAGCGTATGCAGGACGACATTTCATCTGAACGTCATCCCATGTTTGATGCCGTCAGAGATTGTTGCCCGTTGCCGGCATGCCCCTTTGGATGCAACCCTTGTTGTGGATGA	2.81061	1	1
OK193_E_059	Conotoxin precursor	M	M-2	OK193A_TRINITY_DN14_c1_g1_i11_Frame_F2	MMSKLGVLLTICLLLFPLTALPMDGDQSVDRLAERMQDDISSEQHPLFNQKRRCCGEGSSCPRYFRDNFICGCC*	ATGATGTCTAAACTGGGAGTCTTGTTGACCATCTGTTTGCTTCTGTTTCCCCTTACTGCTCTTCCGATGGATGGAGATCAATCTGTAGACCGACTTGCAGAGCGTATGCAGGACGACATTTCATCTGAGCAGCATCCCTTGTTTAATCAGAAAAGAAGGTGCTGCGGCGAAGGCTCGTCATGCCCCAGATATTTCAGAGACAATTTTATTTGTGGTTGTTGTTAA	34.8307	1	1
OK193_E_060	Conotoxin precursor	M	M-2	OK193A_TRINITY_DN14_c1_g1_i10_Frame_F2	MMSKLGVLLTICLLLFPLFALPLDGDQPADRPAERMQDDISSEQHPLFNQKRRCCGEGSSCPRYFRDNFICGCC*	ATGATGTCTAAACTGGGAGTCTTGTTGACCATCTGTCTGCTTCTGTTTCCCCTGTTTGCTCTTCCGCTGGATGGAGATCAACCTGCAGACCGACCTGCAGAGCGTATGCAGGACGACATTTCATCTGAGCAGCATCCCTTGTTTAATCAGAAAAGAAGGTGCTGCGGCGAAGGCTCGTCATGCCCCAGATATTTCAGAGACAATTTTATTTGTGGTTGTTGTTAA	35.6769	1	1
OK193_E_061	Conotoxin precursor	M	M-2	OK193A_TRINITY_DN11210_c0_g1_i1_Frame_F3	MMSKLGVLLTICLLLFPLTALPINGDQPADQPAERMQDDISSEQYPLFDKRQKCCTGKKGSCSGRACKNLRCCAGR*	ATGATGTCTAAACTGGGGGTCTTGTTGACCATCTGTCTGCTTCTGTTTCCCCTTACTGCTCTTCCGATAAATGGAGATCAACCTGCAGACCAACCTGCAGAGCGTATGCAGGACGACATTTCATCTGAGCAGTATCCCTTGTTTGATAAGAGACAAAAGTGCTGCACTGGGAAGAAGGGGTCATGCTCCGGCAGAGCATGCAAAAATCTCAGATGTTGCGCTGGACGATAA	7.54389	1	1
OK193_E_062	Conotoxin precursor	M	M-2	OK193A_TRINITY_DN14_c1_g1_i4_Frame_F2	MMSKLGVLLTICLLLFPLTALPMDGDQSVDRLAERMQDDISSEQHPLFNQKRRCCTGKKGSCSGRAC	ATGATGTCTAAACTGGGAGTCTTGTTGACCATCTGTTTGCTTCTGTTTCCCCTTACTGCTCTTCCGATGGATGGAGATCAATCTGTAGACCGACTTGCAGAGCGTATGCAGGACGACATTTCATCTGAGCAGCATCCCTTGTTTAATCAGAAAAGAAGGTGCTGCACTGGGAAGAAGGGGTCATGCTCCGGCAGAGCATGC	10.7401	0	0
OK193_E_063	Conotoxin precursor	M	M-2	OK193A_TRINITY_DN14_c1_g1_i9_Frame_F1	MMSKLGVLLTICLLLFPLFALPLDGDQPADRPAERMQDDISSEQHPLFNQKRRCCTGKKGSCSGRAC	ATGATGTCTAAACTGGGAGTCTTGTTGACCATCTGTCTGCTTCTGTTTCCCCTGTTTGCTCTTCCGCTGGATGGAGATCAACCTGCAGACCGACCTGCAGAGCGTATGCAGGACGACATTTCATCTGAGCAGCATCCCTTGTTTAATCAGAAAAGAAGGTGCTGCACTGGGAAGAAGGGGTCATGCTCCGGCAGAGCATGC	2.09596	0	0
OK193_E_064	Conotoxin precursor	M	M-3a	OK193A_TRINITY_DN819_c0_g1_i2_Frame_R2	MMLKLRVVLFTLLVLVPMATLKLDADQPVERYVENIQDLNPDERREYILHALGQKRCCQKGTCHGACSCCE*	ATGATGTTGAAACTGAGAGTGGTACTATTCACCTTGCTGGTCCTGGTTCCCATGGCAACGCTCAAACTGGATGCAGATCAACCTGTAGAACGATATGTGGAGAACATACAGGACCTCAACCCAGATGAAAGGAGGGAATACATATTGCATGCTCTGGGGCAGAAACGATGCTGTCAAAAGGGAACTTGCCATGGAGCTTGTTCTTGCTGCGAGTAG	1.26517	1	1
OK193_E_065	Conotoxin precursor	M	M-3a	OK193A_TRINITY_DN819_c0_g1_i21_Frame_R2	MMLKLRVVLFTLLVLVPMATLKLDADQPVERYAENKQLLNPDERRG	ATGATGTTGAAACTGAGAGTGGTACTATTCACCTTGCTGGTCCTGGTTCCCATGGCAACGCTCAAACTGGATGCAGATCAACCTGTAGAACGATATGCGGAGAACAAACAGCTCCTCAACCCAGATGAAAGAAGGGGA	99.0463	0	0
OK193_E_066	Conotoxin precursor	M	M-3a	OK193A_TRINITY_DN819_c0_g1_i18_Frame_R2	MMLKLRVVLFTLLVLVPMATLKLDADQPVERYAENKQDLNPDGKREFILPAVGRTCCDLTWCDGNCRCCTPR*	ATGATGTTGAAACTGAGAGTGGTACTATTCACCTTGCTGGTCCTGGTTCCCATGGCAACGCTCAAACTGGATGCAGATCAACCTGTAGAACGATATGCGGAGAACAAACAGGACCTCAACCCAGATGGAAAAAGGGAATTCATATTGCCTGCTGTGGGGAGAACATGCTGTGATCTTACATGGTGCGACGGAAATTGTCGTTGCTGCACCCCAAGATAG	15.1012	1	1
OK193_E_067	Conotoxin precursor	M	M-3a	OK193A_TRINITY_DN819_c0_g1_i10_Frame_R1	MLKMGVVLFIFLVLFPLATLQLDADQPVERYAENKQDLNPDGKREFILPAVGRTCCDLTWCDGNCRCCTPR*	ATGTTGAAAATGGGAGTGGTGCTATTCATCTTTCTGGTCCTGTTTCCCCTGGCAACACTGCAGCTGGATGCAGATCAACCTGTAGAACGATATGCGGAGAACAAACAGGACCTCAACCCAGATGGAAAAAGGGAATTCATATTGCCTGCTGTGGGGAGAACATGCTGTGATCTTACATGGTGCGACGGAAATTGTCGTTGCTGCACCCCAAGATAG	0	1	1
OK193_E_068	Conotoxin precursor	M	M-3a	OK193A_TRINITY_DN25_c0_g1_i8_Frame_R1	MMLKMGVVLFVFLVLFPLATLQLNADQHVKRYAENKQDLNPDERKGLVSLDLRLPCCDVGWCSKRCNCDVYRP*	ATGATGCTGAAAATGGGAGTGGTGCTATTCGTCTTTCTGGTCCTGTTTCCCCTGGCAACGCTCCAACTGAATGCAGATCAACATGTAAAACGATATGCGGAGAACAAACAGGACCTCAACCCAGATGAAAGGAAGGGATTGGTATCGCTTGATCTGAGGCTACCATGCTGTGATGTTGGATGGTGCAGCAAGCGTTGTAATTGCGACGTCTATAGACCCTGA	20287.6	1	1
OK193_E_069	Conotoxin precursor	M	M-3a	OK193A_TRINITY_DN25_c0_g1_i11_Frame_R1	MMLKLRVVLFILLVLFPMATLQLDADQPVERDAENKQDNPDERKGFVSLALRRPCCSLRWCSNYCRCGI*	ATGATGTTGAAACTGAGAGTGGTACTATTCATCTTGCTGGTCCTGTTTCCCATGGCAACGCTCCAACTGGATGCAGATCAACCTGTAGAACGAGATGCGGAGAACAAACAGGACAACCCAGATGAAAGGAAGGGATTCGTATCGCTTGCTCTGAGGCGACCATGCTGTAGTCTTCGATGGTGCAGCAACTATTGTCGTTGCGGCATCTAA	6.21978	1	1
OK193_E_070	Conotoxin precursor	M	M-3a	OK193A_TRINITY_DN25_c0_g1_i5_Frame_R1	MMLKMGVVLFVFLVLFPLATLQLDADQPVERDAENKQDNPDERKGFVSLALRRPCCSLRWCSNYCRCGI*	ATGATGCTGAAAATGGGAGTGGTGCTATTCGTCTTTCTGGTCCTGTTTCCCCTGGCAACGCTCCAACTGGATGCAGATCAACCTGTAGAACGAGATGCGGAGAACAAACAGGACAACCCAGATGAAAGGAAGGGATTCGTATCGCTTGCTCTGAGGCGACCATGCTGTAGTCTTCGATGGTGCAGCAACTATTGTCGTTGCGGCATCTAA	30765	1	1
OK193_E_071	Conotoxin precursor	M	M-3a	OK193A_TRINITY_DN25_c0_g1_i7_Frame_R1	MMLKMRAVLFTFLVLFPLATLQLDADQPVERDAENKQDNPDERKGFVSLALRRPCCSLRWCSNYCRCGI*	ATGATGCTGAAAATGAGAGCAGTGCTATTCACCTTTCTGGTCCTGTTTCCCCTGGCAACGCTCCAACTGGATGCAGATCAACCTGTAGAACGAGATGCGGAGAACAAACAGGACAACCCAGATGAAAGGAAGGGATTCGTATCGCTTGCTCTGAGGCGACCATGCTGTAGTCTTCGATGGTGCAGCAACTATTGTCGTTGCGGCATCTAA	8.71332	1	1
OK193_E_072	Conotoxin precursor	M	M-3a	OK193A_TRINITY_DN819_c0_g1_i9_Frame_R3	MLKMGVVLFIFLVLFPLATLQLDADQPVERDAENKQDNPDERKGFVSLALRRPCCSLR	ATGTTGAAAATGGGAGTGGTGCTATTCATCTTTCTGGTCCTGTTTCCCCTGGCAACACTGCAGCTGGATGCAGATCAACCTGTAGAACGAGATGCGGAGAACAAACAGGACAACCCAGATGAAAGGAAGGGATTCGTATCGCTTGCTCTGAGGCGGCCATGCTGTAGTCTTCGA	1.22067	0	0
OK193_E_073	Conotoxin precursor	M	M-3a	OK193A_TRINITY_DN25_c1_g1_i2_Frame_R3	DLNPDERRGFKLSALRGCCPLSACDFGSGCTCCA*	GACCTCAACCCAGATGAAAGGAGGGGATTCAAATTGTCTGCTCTGAGGGGATGCTGCCCTTTATCTGCATGCGATTTCGGGTCAGGGTGTACATGCTGCGCTTAG	104.967	1	0
OK193_E_074	Conotoxin precursor	M	M-3a	OK193A_TRINITY_DN25_c1_g1_i8_Frame_R3	DLNPDERRGFKLSALRGCCPSSACDFRSGCTCCA*	GACCTCAACCCAGATGAAAGGAGGGGATTCAAATTGTCTGCTCTGAGGGGATGCTGCCCTTCATCTGCATGCGATTTCAGGTCAGGGTGTACATGCTGCGCTTAG	74.9761	1	0
OK193_E_075	Conotoxin precursor	M	M-3a	OK193A_TRINITY_DN21494_c0_g1_i2_Frame_F2	DQPVERYVENKQDLNPDEWRGFILPALQKRCCKAPWCRTPCACCE*	GATCAACCTGTAGAACGATATGTGGAGAACAAACAGGACCTCAACCCAGATGAATGGAGAGGATTCATATTGCCTGCTCTGCAGAAGCGATGCTGTAAAGCGCCATGGTGCCGTACACCTTGTGCTTGCTGCGAGTAG	22.6332	1	0
OK193_E_076	Conotoxin precursor	M	M-3a	OK193A_TRINITY_DN819_c0_g1_i1_Frame_R2	MLKMGVVLFIFLVLFPLATLQLDADQPVERYAENKQLLNPDERRG	ATGTTGAAAATGGGAGTGGTGCTATTCATCTTTCTGGTCCTGTTTCCCCTGGCAACACTGCAGCTGGATGCAGATCAACCTGTAGAACGATATGCGGAGAACAAACAGCTCCTCAACCCAGATGAAAGAAGGGGA	50.8376	0	0
OK193_E_077	Conotoxin precursor	M	M-3a	OK193A_TRINITY_DN412_c0_g1_i8_Frame_R1	MLKMGVVMLFTFLVLFPLATLQLDADQPVERHAENKQLLNPDERR	ATGCTGAAAATGGGAGTGGTGATGCTATTCACCTTTCTGGTCCTGTTTCCCCTGGCAACGCTCCAGCTGGATGCAGATCAACCTGTAGAACGACATGCGGAGAACAAACAGCTCCTCAACCCAGATGAAAGGAGG	48419.4	0	0
OK193_E_078	Conotoxin precursor	M	M-3a	OK193A_TRINITY_DN10681_c3_g1_i1_Frame_R1	MMLKMGVMLFVFLDLFPLATLQLDADQPVDRYVENKQ	ATGATGCTGAAAATGGGAGTGATGCTATTCGTCTTTCTGGACCTGTTTCCCCTGGCAACGCTCCAACTGGATGCAGATCAACCTGTAGATCGATATGTGGAGAACAAGCAG	20.3	0	0
OK193_E_079	Conotoxin precursor	M	M-3a	OK193A_TRINITY_DN819_c0_g1_i11_Frame_R3	MMLKLRVVLFIFLVLFPLATLQLDAGQPVARYAKNKQDLNPNKRRRFILRAMRQKCCEWKVCEVQCGCCH*	ATGATGTTGAAACTGAGAGTGGTACTATTCATCTTCCTGGTCCTGTTTCCCCTGGCAACGCTCCAACTGGATGCAGGTCAGCCTGTGGCACGATATGCGAAGAACAAACAGGACCTCAACCCAAATAAAAGGAGGAGATTCATATTGCGTGCTATGAGGCAGAAATGCTGTGAGTGGAAAGTGTGCGAAGTTCAGTGTGGTTGCTGCCATTAG	499.715	1	1
OK193_E_080	Conotoxin precursor	M	M-3a	OK193A_TRINITY_DN819_c0_g1_i29_Frame_R2	MMLKLRVVLFIFLVLFPLATLQLDAGQPVARYAKNKQDLNPNKRRRFILPAMRQICCKLKACRPECGCCM*	ATGATGTTGAAACTGAGAGTGGTACTATTCATCTTCCTGGTCCTGTTTCCCCTGGCAACGCTCCAACTGGATGCAGGTCAGCCTGTGGCACGATATGCGAAGAACAAACAGGACCTCAACCCAAATAAAAGGAGGAGATTCATATTGCCTGCTATGAGGCAGATATGCTGTAAGTTGAAAGCGTGCAGACCTGAGTGTGGTTGCTGCATGTAG	94.5936	1	1
OK193_E_081	Conotoxin precursor	M	M-3a	OK193A_TRINITY_DN25_c1_g1_i9_Frame_R2	NADQHVKRYAENKQDLHPNERTGFILPAMRRQGCCIEPLCYQYDCDCCRHL*	AATGCAGATCAACATGTAAAACGGTATGCGGAGAACAAACAGGACCTCCACCCAAATGAAAGGACGGGATTCATATTGCCTGCTATGAGGCGGCAGGGCTGCTGTATAGAGCCACTTTGCTACCAATATGATTGTGATTGCTGCAGGCACCTGTAG	15308.5	1	0
OK193_E_082	Conotoxin precursor	M	M-3a	OK193A_TRINITY_DN1997_c0_g1_i1_Frame_F2	LVLFPQATLQLDADQPVERDAENKQDLHPDERTGFMLSAVGRQGCCIEPLCYQYDCDCCRHL*	CTGGTCCTGTTTCCCCAGGCAACGCTCCAACTGGATGCAGATCAACCTGTAGAACGAGATGCGGAGAACAAACAGGACCTCCACCCAGATGAAAGGACGGGATTCATGTTGTCTGCTGTGGGGCGGCAGGGCTGCTGTATAGAGCCACTTTGCTACCAATATGATTGTGATTGCTGCAGGCACCTGTAG	2549.35	1	0
OK193_E_083	Conotoxin precursor	M	M-3a	OK193A_TRINITY_DN1997_c0_g1_i2_Frame_F2	LVLFPQATLQLDADQPVERDAENKQDLHPDERTGFILSAQKQKRCCKYPLCAAGCSCCRT*	CTGGTCCTGTTTCCCCAGGCAACGCTCCAACTGGATGCAGATCAACCTGTAGAACGAGATGCGGAGAACAAACAGGACCTCCACCCAGATGAAAGGACGGGATTCATATTGTCTGCTCAAAAGCAGAAGCGATGCTGTAAATACCCACTTTGCGCTGCAGGTTGTTCTTGCTGCAGGACCTAG	38.1629	1	0
OK193_E_084	Conotoxin precursor	M	M-3a	OK193A_TRINITY_DN21494_c0_g1_i1_Frame_F2	DQPVERYVENKQDLNPDERGGFISPVLGQKRCCNAPLCAAGCSCCE*	GATCAACCTGTAGAACGATATGTGGAGAACAAACAGGACCTCAACCCAGATGAAAGGGGGGGATTCATATCGCCTGTTCTGGGGCAGAAGCGATGCTGTAATGCGCCACTTTGCGCTGCAGGTTGTTCTTGCTGCGAGTAG	14.3325	1	0
OK193_E_085	Conotoxin precursor	M	M-3a	OK193A_TRINITY_DN1997_c0_g1_i3_Frame_F1	ADQPVERYVENKQDLNPDERTGFILSAQKQKRCCTFPLCATCSSCCRMHPQHP*	GCAGATCAACCTGTAGAACGATATGTGGAGAACAAACAGGACCTCAACCCAGATGAAAGGACGGGATTCATATTGTCTGCTCAAAAGCAGAAGCGATGCTGTACATTCCCACTTTGCGCTACATGTTCTTCTTGCTGCAGGATGCACCCCCAACATCCATGA	1188.62	1	0
OK193_E_086	Conotoxin precursor	M	M-3a	OK193A_TRINITY_DN7629_c0_g1_i7_Frame_F3	VLFIFLVLFTLPTLQLDADQPVERHAENKQLLNPDERRGIILHALGQRVCCPFGGCHQLCQCCGC*	GTGCTATTCATCTTTTTGGTCCTGTTTACCCTGCCAACGCTCCAGCTGGATGCAGATCAACCTGTAGAACGACATGCGGAGAACAAACAGCTCCTCAACCCAGATGAAAGGAGGGGAATCATATTGCATGCTCTGGGGCAGCGAGTATGCTGTCCTTTCGGAGGCTGCCACCAACTTTGTCAATGCTGCGGCTGTTAG	12.1208	1	0
OK193_E_087	Conotoxin precursor	M	M-3a	OK193A_TRINITY_DN7629_c0_g1_i14_Frame_F3	VLFIFLVLFTLPTLQLDADQPVERHAENKQLLNPDERRRIISDALGQRICCPQGGCHQLCQCCGC*	GTGCTATTCATCTTTTTGGTCCTGTTTACCCTGCCAACGCTCCAGCTGGATGCAGATCAACCTGTAGAACGACATGCGGAGAACAAACAGCTCCTCAACCCAGATGAAAGGAGGAGAATCATATCGGATGCTCTGGGGCAGCGAATATGCTGTCCTCAGGGAGGCTGCCACCAACTTTGTCAATGCTGCGGCTGTTAG	0	1	0
OK193_E_088	Conotoxin precursor	M	M-3a	OK193A_TRINITY_DN7629_c0_g1_i2_Frame_F3	VLFIFLVLFTLPTLQLDADQLVERHVENKQLLNPDERRRIISDALGQRICCPQGGCHQLCQCCGC*	GTGCTATTCATCTTTTTGGTCCTGTTTACCCTGCCAACGCTCCAGCTGGATGCAGATCAACTTGTAGAACGACATGTGGAGAACAAACAGCTCCTCAACCCAGATGAAAGGAGGAGAATCATATCGGATGCTCTGGGGCAGCGAATATGCTGTCCTCAGGGAGGCTGCCACCAACTTTGTCAATGCTGCGGCTGTTAG	6.7193	1	0
OK193_E_089	Conotoxin precursor	M	M-3a	OK193A_TRINITY_DN7629_c0_g1_i9_Frame_F3	VLFIFLVLFTLPTLQLDADQLVERHVENKQLLNPDERRRIISVALGQRVCCPFGGCHQLCQCCGC*	GTGCTATTCATCTTTTTGGTCCTGTTTACCCTGCCAACGCTCCAGCTGGATGCAGATCAACTTGTAGAACGACATGTGGAGAACAAACAGCTCCTCAACCCAGATGAAAGGAGGAGAATCATATCGGTTGCTCTGGGGCAGCGAGTATGCTGTCCTTTCGGAGGCTGCCACCAACTTTGTCAATGCTGCGGCTGTTAG	0.677015	1	0
OK193_E_090	Conotoxin precursor	M	M-3a	OK193A_TRINITY_DN819_c0_g1_i13_Frame_R2	MMLKMRVLLFTFLVLLPLVTFQLDADQPRKQYAGNKRALNPGERKKTKLHALRQRCCIGPECPEECYCCV*	ATGATGCTGAAAATGAGAGTACTGCTATTCACCTTTCTGGTCCTGTTACCCTTGGTAACGTTCCAGCTGGATGCAGATCAACCTAGAAAACAGTATGCGGGGAACAAACGGGCCCTCAACCCAGGAGAAAGGAAGAAAACAAAATTGCACGCTCTAAGGCAGCGATGCTGTATTGGGCCAGAATGCCCTGAAGAATGTTATTGCTGCGTGTAG	45.8544	1	1
OK193_E_091	Conotoxin precursor	M	M-3a	OK193A_TRINITY_DN412_c0_g1_i13_Frame_R1	MLKMGVVMLFTFLVLFPLATLHLDADQPADRPAERMQDIATEQHPMFDPVKRCCRKHSCTTCMPCCWG*	ATGCTGAAAATGGGAGTGGTGATGCTATTCACCTTTCTGGTCCTGTTTCCCCTGGCAACGCTCCACCTGGATGCAGATCAACCTGCAGACCGACCTGCAGAGCGTATGCAGGACATTGCAACTGAACAGCATCCCATGTTTGATCCTGTCAAACGGTGCTGCAGGAAGCACAGCTGTACAACATGCATGCCGTGCTGCTGGGGTTGA	414.883	1	1
OK193_E_092	Conotoxin precursor	M	M-3a	OK193A_TRINITY_DN412_c0_g1_i1_Frame_R3	MMLKLSVVLFVFLVLFPLATLHLDADQPADRPAERMQDIATEQHPMFDPVKRCCRKHSCTTCMPCCWG*	ATGATGTTGAAACTGAGCGTGGTACTATTCGTCTTCCTGGTCCTGTTTCCCCTGGCAACGCTCCACCTGGATGCAGATCAACCTGCAGACCGACCTGCAGAGCGTATGCAGGACATTGCAACTGAACAGCATCCCATGTTTGATCCTGTCAAACGGTGCTGCAGGAAGCACAGCTGTACAACATGCATGCCGTGCTGCTGGGGTTGA	168.231	1	1
OK193_E_093	Conotoxin precursor	M	M-3a	OK193A_TRINITY_DN412_c0_g1_i18_Frame_R1	MLKMGVVMLFTFLVLFPLATLHLDADQPADRPARKKDIATKRHPLSDPDGRCCCWRCTRSLH*	ATGCTGAAAATGGGAGTGGTGATGCTATTCACCTTTCTGGTCCTGTTTCCCCTGGCAACGCTCCACCTGGATGCAGATCAACCTGCAGACCGACCTGCGCGTAAAAAGGACATTGCAACTAAACGGCATCCGTTGTCTGATCCTGACGGACGGTGTTGCTGTTGGCGATGCACACGATCCCTCCATTGA	0	1	1
OK193_E_094	Conotoxin precursor	M	M-3a	OK193A_TRINITY_DN412_c0_g1_i7_Frame_R3	MMLKLSVVLFVFLVLFPLATLHLDADQPADRPARKKDIATKRHPLSDPDGRCCCWRCTRSLH*	ATGATGTTGAAACTGAGCGTGGTACTATTCGTCTTCCTGGTCCTGTTTCCCCTGGCAACGCTCCACCTGGATGCAGATCAACCTGCAGACCGACCTGCGCGTAAAAAGGACATTGCAACTAAACGGCATCCGTTGTCTGATCCTGACGGACGGTGTTGCTGTTGGCGATGCACACGATCCCTCCATTGA	1820.36	1	1
OK193_E_095	Conotoxin precursor	M	M-3a	OK193A_TRINITY_DN412_c0_g1_i9_Frame_R1	MLKMGVVMLFTFLVLFPLATLHLDADQPADRPARMQDIATEQHPLFDSLRGCCSGACLPCRR*	ATGCTGAAAATGGGAGTGGTGATGCTATTCACCTTTCTGGTCCTGTTTCCCCTGGCAACGCTCCACCTGGATGCAGATCAACCTGCAGACCGACCTGCGCGTATGCAGGACATTGCAACTGAACAGCATCCCTTGTTTGATTCTCTCAGAGGGTGTTGCAGTGGGGCATGCCTACCATGCCGCCGTTGA	0.00250925	1	1
OK193_E_096	Conotoxin precursor	M	M-3a	OK193A_TRINITY_DN412_c0_g1_i16_Frame_R3	MMLKLSVVLFVFLVLFPLATLHLDADQPADRPARMQDIATEQHPLFDSLRGCCSGACLPCRR*	ATGATGTTGAAACTGAGCGTGGTACTATTCGTCTTCCTGGTCCTGTTTCCCCTGGCAACGCTCCACCTGGATGCAGATCAACCTGCAGACCGACCTGCGCGTATGCAGGACATTGCAACTGAACAGCATCCCTTGTTTGATTCTCTCAGAGGGTGTTGCAGTGGGGCATGCCTACCATGCCGCCGTTGA	1390.55	1	1
OK193_E_097	Conotoxin precursor	M	M-3a-WF	OK193A_TRINITY_DN30533_c0_g1_i1_Frame_R2	LVTLSMEVDQPVERHAEDEQTLNSAEGTGAIMTLLRLLRGCPPDCGGSPSMMPW*	CTGGTAACGCTCAGTATGGAAGTGGATCAACCCGTAGAGCGACATGCGGAGGATGAGCAGACCCTCAACTCAGCTGAAGGAACGGGAGCCATAATGACTCTTCTGAGACTTCTGCGTGGCTGTCCCCCTGATTGTGGCGGATCGCCATCTATGATGCCATGGTAG	1.56411	1	0
OK193_E_098	Conotoxin precursor	M	M-3a-WF	OK193A_TRINITY_DN24735_c0_g1_i1_Frame_R2	EQRVERYVDNKQDLNPEERRDFIMAALRQATGRVCMWC*	GAACAACGTGTAGAGCGATATGTGGACAACAAACAGGACCTCAACCCAGAGGAAAGAAGGGATTTCATAATGGCTGCTCTGAGGCAAGCGACTGGACGTGTCTGTATGTGGTGTTAG	6.14455	1	0
OK193_E_099	Conotoxin precursor	M	M-3a-WF	OK193A_TRINITY_DN25_c0_g1_i14_Frame_R2	MMLKLRVVLFILLVLFPLTTLQLDADQPVERYVENKENLNPDERREIILPALRVQSLVTCTM	ATGATGTTGAAACTGAGAGTGGTACTATTCATCTTGCTGGTCCTGTTTCCCCTGACAACGCTCCAACTGGATGCAGATCAACCTGTAGAACGATATGTGGAGAACAAAGAGAACCTCAACCCAGATGAAAGGAGGGAAATCATATTGCCTGCTCTGAGGGTTCAGAGTCTCGTTACCTGCACTATG	4339.24	0	0
OK193_E_100	Conotoxin precursor	M	M-3a-WF	OK193A_TRINITY_DN25_c0_g1_i23_Frame_R2	MMLKLRVVLFILLVLFPMATLQLDADQPVERYVENKENLNPDERREIILPALRVQSLVTCTMDWCK*	ATGATGTTGAAACTGAGAGTGGTACTATTCATCTTGCTGGTCCTGTTTCCCATGGCAACGCTCCAACTGGATGCAGATCAACCTGTAGAACGATATGTGGAGAACAAAGAGAACCTCAACCCAGATGAAAGGAGGGAAATCATATTGCCTGCTCTGAGGGTTCAGAGTCTCGTTACCTGCACTATGGATTGGTGTAAATAG	6046.52	1	1
OK193_E_101	Conotoxin precursor	M	M-3a-WF	OK193A_TRINITY_DN25_c0_g1_i16_Frame_R1	MMLKLRVVLFILLVLFPMATLQLDADQPVERYVENKENLNPDERREIILPALRVQSLLDCIGDPGSCK*	ATGATGTTGAAACTGAGAGTGGTACTATTCATCTTGCTGGTCCTGTTTCCCATGGCAACGCTCCAACTGGATGCAGATCAACCTGTAGAACGATATGTGGAGAACAAAGAGAACCTCAACCCAGATGAAAGGAGGGAAATCATATTGCCTGCTCTGAGGGTTCAGAGTTTACTTGACTGCATTGGGGATCCAGGTTCGTGTAAATAG	8737.89	1	1
OK193_E_102	Conotoxin precursor	M	M-3a-WF	OK193A_TRINITY_DN25_c0_g1_i12_Frame_R1	MMLKLRVVLFILLVLFPLTTLQLDADQPVERYVENKENLNPDERREIILPALRVQSLIACGDNPDLCI*	ATGATGTTGAAACTGAGAGTGGTACTATTCATCTTGCTGGTCCTGTTTCCCCTGACAACGCTCCAACTGGATGCAGATCAACCTGTAGAACGATATGTGGAGAACAAAGAGAACCTCAACCCAGATGAAAGGAGGGAAATCATATTGCCTGCTCTGAGGGTTCAGAGTTTAATTGCCTGCGGTGACAATCCAGATTTGTGTATATAG	21469.6	1	1
OK193_E_103	Conotoxin precursor	M	M-3a-WF	OK193A_TRINITY_DN888_c0_g1_i2_Frame_F3	QFVERYAENKQNLNPDERREIILPALRVQSLLDCIGDPGSCK*	CAATTTGTAGAACGATATGCGGAGAACAAACAGAACCTCAACCCAGATGAAAGGAGGGAAATCATATTGCCTGCTCTGAGGGTTCAGAGTTTACTTGACTGCATTGGGGATCCAGGTTCGTGTAAATAG	92.9558	1	0
OK193_E_104	Conotoxin precursor	M	M-3a-WF	OK193A_TRINITY_DN888_c0_g1_i3_Frame_F1	MMLKMGVVLFVFLVLFPLATFQLDADQPVERNAENKQDLNPDKRREIILPALRLQARRSCSFPSNTWCK*	ATGATGCTGAAAATGGGAGTGGTGCTATTCGTCTTTCTGGTCCTGTTTCCCCTGGCAACGTTCCAACTGGATGCAGATCAACCTGTAGAACGAAATGCGGAGAACAAACAGGACCTCAACCCAGATAAAAGGAGGGAAATCATATTGCCTGCTCTGAGGCTTCAGGCTCGACGTTCCTGTAGTTTTCCTTCGAACACTTGGTGTAAATAG	17925	1	1
OK193_E_105	Conotoxin precursor	M	M-3a-WF	OK193A_TRINITY_DN25_c0_g1_i22_Frame_R1	MMLKMRAVLFTFLVLFPLATLQLDADQPVERYVENKENLNPDERREIILPALRLQARRSCSFPSNTWCK*	ATGATGCTGAAAATGAGAGCAGTGCTATTCACCTTTCTGGTCCTGTTTCCCCTGGCAACGCTCCAACTGGATGCAGATCAACCTGTAGAACGATATGTGGAGAACAAAGAGAACCTCAACCCAGATGAAAGGAGGGAAATCATATTGCCTGCTCTGAGGCTTCAGGCTCGACGTTCCTGTAGTTTTCCTTCGAACACTTGGTGTAAATAG	210.651	1	1
OK193_E_106	Conotoxin precursor	M	M-3a-WF	OK193A_TRINITY_DN10681_c1_g1_i1_Frame_F3	MMLKMGVVLFVFLVLFPLATFQPDADQPVEPNAENKQDLNPDKRREIIL	ATGATGCTGAAAATGGGAGTGGTGCTATTCGTCTTTCTGGTCCTGTTTCCCCTGGCAACGTTCCAACCGGATGCAGATCAACCTGTAGAACCAAATGCGGAGAACAAACAGGACCTTAACCCAGATAAAAGGAGGGAAATCATATTG	0.703416	0	0
OK193_E_107	Conotoxin precursor	M	M-3a-WF	OK193A_TRINITY_DN25_c0_g1_i6_Frame_R1	MMLKMRAVLFTFLVLFPLATLQLDADQPADRDAENKQDLNPDGRRGIILSALRSSSCDWSPACHLPSERMTAFTANNAALELPYSGLVAPEQ*	ATGATGCTGAAAATGAGAGCAGTGCTATTCACCTTTCTGGTCCTGTTTCCCCTGGCAACGCTCCAGCTGGATGCAGATCAACCTGCAGACCGAGATGCAGAGAACAAACAGGACCTCAACCCAGATGGAAGGAGGGGAATCATATTGTCTGCTCTGAGATCGAGTTCATGTGACTGGAGTCCTGCGTGTCATCTTCCATCGGAACGAATGACTGCTTTTACAGCCAACAATGCCGCACTCGAATTACCCTACAGTGGTTTGGTTGCTCCAGAACAATGA	35597.4	1	1
OK193_E_108	Conotoxin precursor	M	M-3a-WF	OK193A_TRINITY_DN819_c0_g1_i8_Frame_R3	MLKMGVVLFIFLVLFTLPTLQLDADLPADRDAENKQDFNPDGR	ATGTTGAAAATGGGAGTGGTGCTATTCATCTTTTTGGTCCTGTTTACCCTGCCAACGCTCCAGCTGGATGCAGATCTACCTGCAGACCGAGATGCAGAGAACAAACAGGACTTCAACCCAGATGGAAGG	13.0383	0	0
OK193_E_109	Conotoxin precursor	M	M-3a-WF	OK193A_TRINITY_DN888_c1_g1_i2_Frame_F3	MLKMRSVLFTLLVLFPLATLQLDAVQPVERNADNKQDLNPDGRRGFILLALRSGASPGDCKKNCFVKALR*	ATGCTGAAAATGAGATCAGTGTTATTCACCTTGCTGGTCCTGTTTCCCCTGGCAACGCTCCAACTGGATGCAGTTCAACCTGTAGAACGAAATGCGGACAACAAACAGGACCTCAACCCAGATGGAAGGAGGGGATTCATATTGCTTGCTCTGAGGTCTGGGGCTTCTCCAGGGGACTGTAAAAAAAACTGCTTTGTCAAAGCCCTACGTTAA	4.30008	1	1
OK193_E_110	Conotoxin precursor	M	M-3a-WF	OK193A_TRINITY_DN297_c0_g1_i1_Frame_R3	MSKLGVVLFTFLLLFPLATLQRIQDQPADRNAEPRGKIRGRMNGFLTQMLFGHPDHNYAAWCPWCG*	ATGTCAAAACTGGGAGTCGTGCTGTTTACCTTTCTGCTTCTGTTTCCTCTGGCAACTCTTCAGCGCATTCAAGATCAACCTGCAGATCGTAATGCAGAGCCAAGGGGCAAGATCCGAGGTCGAATGAATGGATTCTTGACGCAAATGTTGTTCGGGCATCCAGATCATAATTATGCCGCCTGGTGTCCTTGGTGTGGCTGA	775.849	1	1
OK193_E_111	Conotoxin precursor	M	M-3a-WF	OK193A_TRINITY_DN41071_c0_g1_i1_Frame_F2	LLVFSLATPKPIQDQPTDRHAEPRGKIRDGMNELFWRMLIRYQHQRHHYAFACPWCG*	CTCCTTGTGTTTTCTCTGGCAACTCCTAAGCCCATTCAAGATCAACCTACAGATCGTCATGCAGAGCCAAGGGGCAAGATCCGAGATGGAATGAATGAACTCTTTTGGCGAATGCTGATCAGGTATCAGCATCAACGTCATCATTATGCCTTCGCGTGTCCTTGGTGTGGCTGA	1.35249	1	0
OK193_E_112	Conotoxin precursor	M	M-3b-WF	OK193A_TRINITY_DN1375_c0_g2_i1_Frame_R1	MSKLGVVLCIFLVLFPMATLQLDGDQTADRHADQRGQDLTEQQRNSKRVLKKRDWEYHAHPKPNSFWTLV*	ATGTCTAAACTGGGAGTCGTGTTGTGCATCTTTCTGGTTCTGTTTCCCATGGCAACTCTTCAGCTGGATGGAGATCAAACCGCTGATCGTCATGCAGACCAAAGGGGCCAGGACCTAACAGAACAGCAACGAAACTCGAAGCGTGTTCTGAAGAAAAGGGATTGGGAATACCATGCACATCCAAAACCCAATAGCTTCTGGACGCTTGTTTGA	19.2766	1	1
OK193_E_113	Conotoxin precursor	M	M-3b-WF	OK193A_TRINITY_DN1375_c0_g2_i3_Frame_R1	MSKLGVVLCIFLVLFPMATLQMDADQTADRHADERDQDRAEQNRNLMRVLKRDWFHIDLTPNNKNTWWTLV*	ATGTCTAAACTGGGAGTCGTGTTGTGCATCTTTCTGGTTCTGTTTCCCATGGCAACTCTTCAGATGGATGCAGATCAAACCGCTGATCGCCATGCAGACGAAAGGGACCAGGACCGAGCAGAACAGAATCGAAACTTGATGCGTGTTCTGAAAAGGGATTGGTTCCATATAGATCTAACGCCAAACAACAAAAATACTTGGTGGACGCTTGTTTGA	6648.66	1	1
OK193_E_114	Conotoxin precursor	M	M-3b-WF	OK193A_TRINITY_DN1375_c0_g1_i1_Frame_R3	MSKLGVMLFIFLVLFPMATLQLDGDQTADRHAGERDQDLLEQYRNLKHALKRTRNYYVYSASPENSWWTRVV*	ATGTCTAAACTGGGAGTCATGTTGTTCATCTTTCTGGTTCTGTTTCCCATGGCAACTCTTCAGCTGGATGGAGATCAAACCGCTGATCGTCATGCAGGAGAGAGGGACCAGGACCTACTAGAACAGTATCGAAACTTGAAGCATGCTCTGAAAAGGACTAGGAACTACTACGTATATTCTGCAAGTCCAGAGAACTCCTGGTGGACGCGGGTCGTCTAA	8.03512	1	1
OK193_E_115	Conotoxin precursor	M	M-5	OK193A_TRINITY_DN16_c0_g1_i11_Frame_R3	MSKVGAVLLIFLVILSLAALQNGDDPRRQRDEKQSPKRGSLRKYSYNIQRRCVYSTPCGECTRRGKICSVQPGGKGTCGECVPGRR*	ATGTCGAAAGTGGGAGCTGTACTTCTCATCTTTCTGGTTATTTTGTCTTTGGCAGCCCTCCAGAATGGAGATGATCCAAGACGGCAAAGAGACGAGAAGCAAAGTCCTAAGAGGGGCAGTCTGAGAAAATACAGTTACAACATCCAACGACGTTGCGTGTATAGCACACCATGCGGCGAGTGCACCAGAAGGGGTAAAATATGCTCGGTGCAGCCTGGAGGAAAAGGCACCTGCGGGGAGTGCGTTCCAGGACGCAGATAG	189.678	1	1
OK193_E_116	Conotoxin precursor	M	M-8	OK193A_TRINITY_DN1627_c1_g1_i20_Frame_F3	MMLKLRVGVYILLVLLPLTTLQEKKDDASEALVKQSDEKRAEGAILTPDLTRDTRDGCNNNGCNNTDDCPSGCSCNLNQFGWGNTCISD*	ATGATGTTGAAACTGAGAGTTGGGGTGTACATCCTCCTGGTTCTTTTGCCCCTGACAACCCTTCAAGAGAAAAAGGATGACGCCTCTGAAGCACTGGTCAAGCAGTCGGATGAGAAGCGTGCAGAGGGCGCTATCTTGACGCCCGATCTGACCAGAGATACACGTGACGGCTGTAACAACAACGGATGCAACAATACTGATGACTGTCCCTCCGGTTGCTCTTGCAATTTGAACCAGTTTGGGTGGGGCAACACCTGCATCAGTGATTAA	6096.68	1	1
OK193_E_117	Conotoxin precursor	N	N-1	OK193A_TRINITY_DN14_c0_g1_i63_Frame_R1	VVSDGQAIPVGGVPSAVNSRVRPLLGGDKERGRSVAKRCPGPKSCGSGEAEVCCESSDCYCKLLHSQPFSRLVCVCPD*	GTTGTTTCAGATGGACAAGCCATTCCAGTGGGAGGAGTCCCCAGTGCTGTGAACAGTCGAGTCAGACCTCTTCTGGGAGGGGACAAGGAAAGGGGTCGATCAGTCGCGAAGCGCTGCCCTGGTCCCAAGAGCTGTGGCAGCGGGGAAGCGGAGGTGTGCTGTGAAAGCTCTGACTGCTATTGCAAGCTGCTACACTCTCAGCCATTTAGCAGGCTTGTATGTGTTTGCCCCGACTAA	25.4731	1	0
OK193_E_118	Conotoxin precursor	N	N-1	OK193A_TRINITY_DN14_c0_g1_i30_Frame_R3	LLILLLLLLPLATCDGDGQAIPVGGVPSAVNSRVRPLLGGDKERGRSVAKRCPGPKSCGSGEAEVCCESSDCYCKLLHSQPFSRLVCVCPD*	CTGCTCATCCTCCTCCTGCTCCTGTTGCCCCTGGCAACCTGTGATGGTGATGGACAAGCCATTCCAGTGGGAGGAGTCCCCAGTGCTGTGAACAGTCGAGTCAGACCTCTTCTGGGAGGGGACAAGGAAAGGGGTCGATCAGTCGCGAAGCGCTGCCCTGGTCCCAAGAGCTGTGGCAGCGGGGAAGCGGAGGTGTGCTGTGAAAGCTCTGACTGCTATTGCAAGCTGCTACACTCTCAGCCATTTAGCAGGCTTGTATGTGTTTGCCCCGACTAA	14.1517	1	0
OK193_E_119	Conotoxin precursor	N	N-1	OK193A_TRINITY_DN27828_c0_g1_i1_Frame_R1	MSTLKMMLLILLLLLPLATFDSDGQAIPGGGIPSAVNSRVGRLLGGDEKSGRSLEKRCSSGKTCGSVEPVLCCARSDCYCRLIQT	ATGTCAACACTGAAAATGATGCTGCTCATCCTCCTGCTTCTGTTGCCCCTGGCAACCTTTGATAGTGATGGACAAGCGATTCCAGGGGGTGGAATCCCTAGTGCAGTGAACAGTCGAGTCGGACGTCTTCTGGGAGGGGACGAGAAAAGTGGTCGATCGCTCGAGAAGCGTTGCAGTAGTGGCAAGACCTGTGGCAGCGTGGAGCCGGTATTGTGTTGTGCAAGAAGTGACTGCTATTGCAGGTTGATACAAACT	0.818029	0	0
OK193_E_120	Conotoxin precursor	N	N-2	OK193A_TRINITY_DN1132_c0_g1_i1_Frame_F2	MSTLGMVLLLFLLLLPLGNSDGDGDRQAMDRDRTAGGVRSAPSLRLRRHMDQGRSADKRCSTKKCGENCCPRSDCKCDVHGGSSNEVGCSCPVKK*	ATGTCAACACTGGGAATGGTACTGCTGCTCTTCCTGCTTCTTCTGCCCCTGGGAAACTCAGATGGGGACGGGGATCGGCAAGCGATGGACAGAGACCGTACTGCCGGTGGGGTACGCAGTGCCCCCAGCCTCCGCTTGAGAAGACACATGGACCAGGGCCGATCTGCCGACAAACGTTGCTCCACTAAGAAATGCGGTGAGAACTGCTGTCCTCGCAGTGACTGTAAGTGCGATGTTCATGGTGGATCGAGCAACGAAGTGGGCTGCAGTTGCCCCGTCAAAAAGTGA	5.82152	1	1
OK193_E_121	Conotoxin precursor	O1	O1-1	OK193A_TRINITY_DN2347_c0_g1_i17_Frame_R1	MKLTCVVIVAVLFLTACQLITAEDSRGTQKHRTLRSTVRRSKSELTTRCRPSGSNCGNISICCGRCVNRRCT*	ATGAAACTGACGTGTGTGGTGATCGTCGCCGTTCTGTTCCTGACGGCGTGTCAACTCATCACAGCTGAGGACTCCAGAGGTACGCAGAAGCATCGTACCCTGAGGTCGACCGTCAGACGCTCCAAGTCCGAGTTGACTACGAGATGCAGGCCTTCAGGATCCAACTGTGGTAATATTAGTATCTGCTGTGGTAGATGCGTTAACAGAAGATGTACGTAG	19.2857	1	1
OK193_E_122	Conotoxin precursor	O1	O1-1	OK193A_TRINITY_DN2347_c0_g1_i7_Frame_R1	MKLTCVVIVAVLLLTACQLITADDSRGTQKHRSLRSTTKVSKSTSCMKAGSYCVATTRICCGYCAYFGKICIDYPKN*	ATGAAACTGACGTGTGTGGTGATCGTCGCCGTGCTGCTCCTGACGGCCTGTCAACTCATCACAGCTGATGACTCCAGAGGTACGCAGAAGCATCGTTCCCTGAGGTCCACTACCAAAGTCTCCAAGTCGACTAGCTGCATGAAAGCCGGGTCTTATTGCGTCGCTACTACGAGAATCTGCTGCGGTTATTGCGCTTATTTCGGCAAAATATGTATTGACTATCCCAAAAACTGA	18.932	1	1
OK193_E_123	Conotoxin precursor	O1	O1-1	OK193A_TRINITY_DN2347_c0_g1_i8_Frame_R1	MKLTCVVIVAVLLLTACQLITADDSRGTQKHRSLRSTTKVSMSTRCKGKGASCLRTAYDCCTGSCNRGRCG*	ATGAAACTGACGTGTGTGGTGATCGTCGCCGTGCTGCTCCTGACGGCCTGTCAACTCATCACAGCTGATGACTCCAGAGGTACGCAGAAGCATCGTTCCCTGAGGTCGACTACTAAAGTCTCCATGTCGACTCGCTGCAAGGGTAAAGGAGCATCATGTCTTAGGACTGCGTATGACTGCTGCACCGGTTCTTGCAACAGAGGTAGATGTGGCTGA	13.1082	1	1
OK193_E_124	Conotoxin precursor	O1	O1-1	OK193A_TRINITY_DN2347_c0_g1_i6_Frame_R2	MKLTCVVIVAVLLLTACQLITADDSRGTQKHRALRSETKLSMSTRCKGKGASCLRTAYDCCTGSCNRGRCG*	ATGAAACTGACGTGTGTGGTGATCGTCGCCGTGCTGCTCCTGACGGCCTGTCAACTCATCACAGCTGATGACTCCAGAGGTACGCAGAAGCATCGTGCCCTGAGGTCGGAAACCAAACTCTCCATGTCGACTCGCTGCAAGGGTAAAGGAGCATCATGTCTTAGGACTGCGTATGACTGCTGCACCGGTTCTTGCAACAGAGGTAGATGTGGCTGA	19.5326	1	1
OK193_E_125	Conotoxin precursor	O1	O1-1	OK193A_TRINITY_DN2347_c0_g1_i19_Frame_R2	MKLTCVVIVAVLLLTACQLITADDSRGTQKHRALKSDTKLSMLTLRCASYGKPCGIYND	ATGAAACTGACGTGTGTGGTGATCGTCGCCGTGCTGCTCCTGACGGCCTGTCAACTCATCACAGCTGATGACTCCAGAGGTACGCAGAAGCATCGTGCCCTGAAGTCGGACACCAAACTCTCCATGTTAACTTTGCGCTGCGCATCTTACGGAAAACCTTGTGGTATTTACAACGAC	2.55474	0	0
OK193_E_126	Conotoxin precursor	O1	O1-2	OK193A_TRINITY_DN7618_c2_g1_i2_Frame_F2	MKLTCVLIIAVLFLTACQLTTAETYSRGRQKHRARRSTDKNSKWTRECTDSGGACNSHDQCCNEFCSTATRTCI*	ATGAAACTGACGTGCGTGTTGATCATCGCCGTGCTGTTCCTGACGGCCTGTCAACTCACTACAGCTGAGACTTACTCCAGAGGTAGGCAGAAGCATCGTGCTCGGAGGTCAACTGACAAAAACTCCAAGTGGACCAGGGAATGCACAGATTCCGGCGGAGCCTGTAATAGTCATGATCAATGCTGCAACGAGTTTTGCAGTACGGCGACCAGGACATGTATTTAA	47708.9	1	1
OK193_E_127	Conotoxin precursor	O1	O1-3	OK193A_TRINITY_DN5720_c0_g1_i3_Frame_R3	MKLTCMMIVAVLFLTAWTFVMADDSGNGLENLFSKAHHEMKNPKDSKLNKRCLDAGEMCDLFNSKCCSGWCIILFCA*	ATGAAACTGACGTGCATGATGATCGTTGCTGTGCTGTTCTTGACCGCCTGGACATTCGTCATGGCTGATGACTCCGGAAATGGATTGGAGAATCTTTTTTCGAAGGCACATCACGAAATGAAGAACCCCAAAGACTCTAAATTGAACAAGAGGTGCCTTGACGCTGGTGAAATGTGTGATCTTTTTAATTCAAAATGCTGCAGTGGGTGGTGCATTATTCTCTTCTGCGCATAA	3.73777	1	1
OK193_E_128	Conotoxin precursor	O1	O1-3	OK193A_TRINITY_DN5720_c0_g1_i1_Frame_R3	MKLTCMMIVAVLFLTAWTFVMADDSGNGLENLFSKAHHEMKNPEASKLNKRCPNTGELCDVVEQNCCYTYCFIVVCL*	ATGAAACTGACGTGCATGATGATCGTTGCTGTGCTGTTCTTGACCGCCTGGACATTCGTCATGGCTGATGACTCCGGAAATGGATTGGAGAATCTTTTTTCGAAGGCACATCACGAAATGAAGAACCCCGAAGCCTCTAAATTGAACAAGAGGTGCCCTAACACTGGTGAATTATGTGATGTGGTTGAACAAAACTGCTGCTATACCTATTGCTTTATTGTAGTCTGCCTATAA	3.73777	1	1
OK193_E_129	Conotoxin precursor	O1	O1-3	OK193A_TRINITY_DN176_c2_g2_i1_Frame_R2	IVAVLFLTAWTFVTAVPHSSDVLENLYLKALHETENHEASKLNVRDDECEPPGDFCGFFKIGPPCCSGWCFLWCA*	ATCGTTGCTGTGCTGTTCTTGACCGCCTGGACATTCGTCACGGCTGTGCCTCACTCCAGCGATGTATTGGAGAATCTTTATCTGAAGGCACTTCACGAAACGGAAAACCACGAAGCCTCTAAATTGAACGTGAGAGACGACGAGTGCGAACCTCCTGGAGATTTTTGTGGCTTTTTTAAAATTGGGCCGCCTTGCTGCAGTGGCTGGTGCTTCCTCTGGTGCGCCTAA	9.26286	1	0
OK193_E_130	Conotoxin precursor	O1	O1-3	OK193A_TRINITY_DN2347_c0_g1_i5_Frame_R1	MKLTCMMIVAVLFLTAWTLVMADDSNNGLANHFLKSRDEMEDPEASKLEKRACSKKWEYCIVPILGFVYCCPGLICGPFVCV*	ATGAAACTGACGTGCATGATGATCGTTGCTGTGCTGTTCTTGACAGCCTGGACGCTCGTCATGGCTGATGACTCCAACAATGGACTGGCGAATCATTTTTTGAAATCACGTGACGAAATGGAGGACCCCGAAGCTTCTAAATTGGAGAAAAGGGCGTGCAGCAAAAAATGGGAATATTGTATAGTACCGATCCTTGGATTCGTATATTGCTGCCCTGGCTTAATCTGTGGTCCTTTCGTCTGCGTTTGA	5.8172	1	1
OK193_E_131	Conotoxin precursor	O1	O1-3	OK193A_TRINITY_DN176_c0_g1_i9_Frame_R3	MKMTYILIVAVLFLTAWTSVTAGDFKNKLKNLSLKARKEVENPKASKLHQKRCVQTGGSCPSTTGCCNGLCNVDKCT*	ATGAAAATGACGTACATACTGATCGTTGCTGTGCTGTTCTTGACTGCCTGGACATCCGTCACGGCTGGTGACTTCAAAAATAAACTGAAGAATCTTTCTTTGAAGGCACGTAAAGAAGTGGAGAACCCCAAAGCCTCTAAATTGCACCAGAAAAGATGCGTACAGACGGGTGGTTCGTGTCCATCGACTACCGGATGCTGCAATGGCTTATGTAATGTTGACAAGTGCACCTAG	19930.9	1	1
OK193_E_132	Conotoxin precursor	O1	O1-3	OK193A_TRINITY_DN176_c0_g1_i28_Frame_R3	MKMTYILIVAVLFLTAWTSVTAGDFKNKLKNLSLKARKEVENPKASKLHQKACVNRGDPCQRTVRCCSRRCGVNSCA*	ATGAAAATGACGTACATACTGATCGTTGCTGTGCTGTTCTTGACTGCCTGGACATCCGTCACGGCTGGTGACTTCAAAAATAAACTGAAGAATCTTTCTTTGAAGGCACGTAAAGAAGTGGAGAACCCCAAAGCCTCTAAATTGCACCAGAAAGCATGCGTAAACAGGGGTGATCCGTGTCAAAGGACTGTCAGATGCTGCAGTCGCAGATGTGGTGTTAACAGCTGCGCCTAG	15260.6	1	1
OK193_E_133	Conotoxin precursor	O1	O1-3	OK193A_TRINITY_DN176_c0_g1_i15_Frame_R3	MKLTYIMIVAVLLLTAWTFVTADDYKYGLENRFSKARNEVENPKASKLHQKACVNRGDPCQRTVRCCSRRCGVNSCA*	ATGAAACTGACGTACATAATGATCGTTGCTGTGCTGTTATTGACTGCCTGGACATTCGTCACGGCTGATGACTACAAATATGGACTGGAGAATCGTTTTTCGAAGGCACGTAACGAAGTGGAGAACCCCAAAGCCTCTAAATTGCACCAGAAAGCATGCGTAAACAGGGGTGATCCGTGTCAAAGGACTGTCAGATGCTGCAGTCGCAGATGTGGTGTTAACAGCTGCGCCTAG	0	1	1
OK193_E_134	Conotoxin precursor	O1	O1-3	OK193A_TRINITY_DN176_c0_g1_i4_Frame_R3	MKLTYIMIVAVLLLTAWTFVTADDYKYGLENRFSKARNEVENPKASELDKRSCYEAGEFCFFSVPGLFICCSSVCLFHVCL*	ATGAAACTGACGTACATAATGATCGTTGCTGTGCTGTTATTGACTGCCTGGACATTCGTCACGGCTGATGACTACAAATATGGACTGGAGAATCGTTTTTCGAAGGCACGTAACGAAGTGGAGAACCCCAAAGCCTCTGAATTGGACAAGAGGAGCTGCTATGAGGCGGGTGAATTTTGTTTCTTCTCGGTCCCTGGACTCTTCATATGCTGCAGTAGCGTGTGCCTTTTCCACGTCTGCCTCTAG	47.9951	1	1
OK193_E_135	Conotoxin precursor	O1	O1-3	OK193A_TRINITY_DN2680_c0_g1_i1_Frame_F3	TCMVIVAALFLTAWTFVTADDSINGPDNRGIWGKPSSKARDEMKNPKDSEWKWCHPKGEICFFKQYIPCCSGKCEVVCL*	ACGTGCATGGTGATTGTTGCTGCGCTGTTCCTCACTGCCTGGACATTCGTCACGGCTGATGACTCCATAAATGGACCAGACAATAGAGGAATTTGGGGGAAACCTTCTTCGAAGGCACGTGACGAAATGAAGAACCCCAAAGACTCTGAATGGAAATGGTGCCATCCTAAAGGTGAAATTTGTTTCTTCAAGCAATACATTCCATGCTGCAGTGGCAAGTGCGAAGTCGTCTGCTTGTAA	10.7582	1	0
OK193_E_136	Conotoxin precursor	O1	O1-3	OK193A_TRINITY_DN2347_c0_g1_i3_Frame_R2	MKLTCMMIVAVLFLTAWTFVMADDPRDGPDTAVRGGKRFWKARNEMNSAASKLNKRECLEADYYCVLPFVGNGMCCSGICVFVCIAQKY*	ATGAAACTGACGTGCATGATGATCGTTGCTGTGCTGTTCTTGACCGCCTGGACATTCGTCATGGCTGATGACCCCAGAGACGGACCGGATACGGCAGTAAGAGGGGGGAAACGTTTCTGGAAGGCACGTAACGAAATGAACTCCGCAGCCTCTAAATTGAACAAGAGAGAGTGCCTGGAAGCTGATTATTATTGCGTCTTACCGTTTGTGGGCAACGGGATGTGCTGCAGTGGCATTTGTGTTTTTGTCTGCATAGCCCAAAAGTATTAA	2.30798	1	1
OK193_E_137	Conotoxin precursor	O1	O1-3	OK193A_TRINITY_DN176_c2_g1_i1_Frame_R2	IVAVLFLTAWTFVMADDPRDGPDTVVRGGKLFSKARDEMNPAASKLNERDCLEPDYVCGIPFVFNGLCCSGICVFICIAQKY*	ATCGTTGCTGTGCTGTTCTTGACCGCCTGGACATTCGTCATGGCTGATGACCCCAGAGATGGACCGGATACTGTAGTAAGAGGGGGGAAACTTTTCTCGAAGGCACGTGACGAAATGAACCCCGCAGCCTCTAAATTGAACGAGAGAGACTGCCTTGAACCTGATTATGTTTGCGGCATACCGTTTGTGTTCAACGGGCTATGCTGCAGTGGAATTTGTGTTTTTATCTGCATAGCCCAAAAGTATTAA	5.45926	1	0
OK193_E_138	Conotoxin precursor	O1	O1-3	OK193A_TRINITY_DN5720_c1_g1_i1_Frame_R2	DLFPKERHEMNNPEASKLNQREACYNAGSFCGIHPGLCCSEFCILWCITFVDSG*	GATCTGTTTCCGAAGGAACGTCACGAAATGAACAACCCCGAAGCCTCTAAATTGAACCAGAGAGAAGCCTGCTATAATGCTGGTTCATTTTGTGGCATCCATCCAGGACTCTGCTGCAGCGAGTTTTGCATTCTTTGGTGCATAACATTTGTTGATTCTGGCTAA	2.7372	1	0
OK193_E_139	Conotoxin precursor	O2	O2-2	OK193A_TRINITY_DN43_c0_g2_i4_Frame_F2	MEKLAILLLVAAVLMSTQALIQGGAKNRLKENMKLFSKRKAAAERGMWGECKDWLTVCLSPTECCSENCELYCRAW*	ATGGAGAAACTGGCAATCCTGCTTCTTGTTGCTGCTGTACTGATGTCGACCCAGGCCCTGATTCAAGGGGGTGCAAAAAACCGCCTAAAGGAGAACATGAAATTGTTTTCAAAAAGAAAGGCAGCTGCTGAGAGGGGGATGTGGGGCGAATGCAAAGATTGGTTAACGGTATGTTTGTCGCCCACGGAATGTTGTTCTGAGAACTGTGAACTGTACTGTCGTGCGTGGTGA	23.0205	1	1
OK193_E_140	Conotoxin precursor	O2	O2-2	OK193A_TRINITY_DN43_c0_g2_i5_Frame_F3	MEKLTILLLVALVLMSTQALIQGGAKNRLKENMKLFSKRKAAAERGMWGECKDWLTVCLSPTECCSENCELYCRAW*	ATGGAGAAACTGACAATCCTGCTTCTTGTTGCTCTTGTACTGATGTCGACCCAGGCCCTGATTCAAGGGGGTGCAAAAAACCGCCTAAAGGAGAACATGAAATTGTTTTCAAAAAGAAAGGCAGCTGCTGAGAGGGGGATGTGGGGCGAATGCAAAGATTGGTTAACGGTATGTTTGTCGCCCACGGAATGTTGTTCTGAGAACTGTGAACTGTACTGTCGTGCGTGGTGA	54.2989	1	1
OK193_E_141	Conotoxin precursor	O2	O2-2	OK193A_TRINITY_DN43_c0_g1_i33_Frame_R2	MEKLAILLLVAAVLMSTQALIQEKRPKERIRFLSKRKTEAEIWWEGECTDWLGSCLSPSDCCFEHCETFCRLW*	ATGGAGAAACTGGCAATCCTGCTCCTTGTTGCTGCTGTACTGATGTCGACCCAGGCCCTGATTCAAGAAAAACGCCCAAAGGAGAGAATCAGATTTTTGTCAAAAAGAAAGACAGAAGCTGAGATTTGGTGGGAGGGCGAATGCACTGATTGGTTAGGGAGTTGTTTGTCGCCCTCAGACTGCTGTTTTGAGCATTGTGAAACGTTCTGCAGGTTGTGGTGA	42.8967	1	1
OK193_E_142	Conotoxin precursor	O2	O2-2	OK193A_TRINITY_DN43_c0_g1_i28_Frame_R3	MQKLTILLLVAAVLMSIQALNQRGGVKRPREMIKYLSKRKTALESWWENECSGWSVYCTKHSECCSDECIGYYCDLW*	ATGCAGAAACTTACAATCCTGCTTCTTGTGGCTGCTGTACTGATGTCGATCCAGGCTCTGAATCAACGTGGTGGAGTAAAACGTCCAAGGGAGATGATCAAATATTTATCAAAAAGAAAGACAGCTCTTGAGAGTTGGTGGGAAAACGAATGCAGTGGTTGGTCCGTGTATTGCACGAAGCACTCGGAATGTTGTTCTGATGAATGTATTGGTTATTACTGTGACTTGTGGTGA	19371.3	1	1
OK193_E_143	Conotoxin precursor	O2	O2-2	OK193A_TRINITY_DN22912_c0_g1_i1_Frame_R2	EKLTILLLLAAVLMSTQALIQGGVEKRQMAKIDFSKRKSTAESWWEGECRTWNAPCRLDSECCSGNCGKHHC	GAAAAACTGACAATCCTGCTTCTTCTTGCTGCTGTACTGATGTCGACCCAGGCCCTTATTCAAGGTGGTGTAGAAAAACGTCAAATGGCGAAGATCGACTTTTCAAAAAGAAAGTCAACTGCTGAGAGTTGGTGGGAGGGCGAATGCAGGACTTGGAATGCGCCGTGTAGGCTTGACTCGGAATGTTGTTCTGGTAATTGTGGCAAACACCATTGC	1.12102	0	0
OK193_E_144	Conotoxin precursor	O2	O2-2	OK193A_TRINITY_DN22912_c0_g1_i2_Frame_R2	EKLTILLLLAAVLMSTQALVQSDGKKRPKHKIKFLSKRKTTAESWWEGECRTWNAPCRLDSECCSGNCGKHHC	GAAAAACTGACAATCCTGCTTCTTCTTGCTGCTGTACTGATGTCGACCCAGGCCCTGGTTCAAAGTGATGGAAAAAAACGCCCAAAGCATAAGATCAAATTTTTATCAAAAAGAAAGACAACTGCTGAGAGTTGGTGGGAGGGCGAATGCAGGACTTGGAATGCGCCGTGTAGGCTTGACTCGGAATGTTGTTCTGGTAATTGTGGCAAACACCATTGC	1.02519	0	0
OK193_E_145	Conotoxin precursor	O2	O2-2	OK193A_TRINITY_DN5282_c1_g1_i1_Frame_R1	MEKLTILLLVAAVLMSTQALIQSGAEKRPWENIRFLSKRQASWEVWWEGNCIEWLASCSTDEQCCSGACGDYCTLW*	ATGGAGAAACTGACAATCCTGCTCCTTGTTGCTGCTGTGCTGATGTCGACCCAGGCCCTGATTCAAAGTGGTGCAGAAAAACGCCCATGGGAGAATATCAGATTTTTATCAAAAAGACAGGCAAGCTGGGAGGTATGGTGGGAAGGCAATTGCATTGAGTGGTTAGCATCGTGTTCGACGGACGAGCAATGCTGTTCGGGTGCTTGTGGCGACTACTGTACCCTGTGGTGA	13.9274	1	1
OK193_E_146	Conotoxin precursor	O2	O2-2	OK193A_TRINITY_DN8531_c0_g1_i1_Frame_F3	MQKLTILLLVAAVLLSTQALNQEKRPKEMINFLSKGKTNAERRKRQCEDVWMPCTSNWECCSLDCEMYCTQIG*	ATGCAGAAACTGACAATCCTGCTTCTTGTTGCTGCTGTGCTGCTGTCGACCCAGGCCCTAAATCAAGAAAAACGCCCAAAGGAGATGATCAATTTTTTATCAAAAGGAAAGACAAATGCTGAGAGGCGGAAGCGCCAATGCGAGGATGTTTGGATGCCTTGTACATCGAACTGGGAATGCTGTTCTTTGGATTGTGAAATGTACTGCACACAGATAGGATGA	6.29182	1	1
OK193_E_147	Conotoxin precursor	O2	O2-2	OK193A_TRINITY_DN43_c2_g1_i1_Frame_R1	VLMSTQALYQEKRQKEMINFLSKGKINAERRKRGCKATWMSCSSGWECCSMSCDMYCG*	GTGCTGATGTCGACCCAGGCCCTATATCAAGAAAAACGCCAAAAGGAGATGATCAATTTTTTATCAAAAGGAAAGATAAATGCTGAGAGGCGGAAGCGCGGATGCAAAGCTACTTGGATGTCTTGTTCATCGGGCTGGGAATGCTGTTCTATGAGTTGTGACATGTACTGCGGATAG	10.403	1	0
OK193_E_148	Conotoxin precursor	O2	O2-4	OK193A_TRINITY_DN17275_c0_g1_i2_Frame_F1	MEKLTILLLVAAVLLSTQVLVQGDGETPDKAKINFYASRMSLGNMRSRQSCSWPFDACTSDRQCCSGHCIGHSYCKKMDY*	ATGGAGAAACTGACAATCCTGCTTCTTGTTGCTGCTGTGCTGTTGTCGACCCAGGTCCTGGTTCAAGGTGATGGAGAAACACCGGACAAGGCGAAGATCAACTTTTACGCATCAAGAATGTCATTGGGAAATATGCGTTCCAGACAATCTTGCAGCTGGCCATTTGACGCTTGTACAAGTGATCGGCAATGCTGCAGTGGTCATTGTATTGGTCACTCTTACTGTAAGAAGATGGACTACTGA	2.55615	1	1
OK193_E_149	Conotoxin precursor	O2	O2-4	OK193A_TRINITY_DN17275_c0_g1_i6_Frame_F1	MAKLTSLLLVAAVLLSTQVLVQGDGETPDKAKINFYASRMLSGIMRPACRLTGHPCNSGMECCS	ATGGCGAAACTGACAAGCCTGCTTCTTGTTGCTGCTGTGCTGTTGTCGACCCAGGTCCTGGTTCAAGGTGATGGAGAAACACCGGACAAGGCGAAGATCAACTTTTACGCATCAAGAATGTTATCGGGAATTATGCGACCAGCTTGCAGACTAACAGGTCACCCTTGTAACAGTGGTATGGAATGCTGCAGT	3.93548	0	0
OK193_E_150	Conotoxin precursor	O2	O2-4	OK193A_TRINITY_DN17275_c0_g1_i3_Frame_F1	MEKLTILLLVAAVLLSTQVLVQGDEENPHKATTKLFTGRMLSGNKQKRCRSRGQPCSYNTECCSTRCKRHQHKCL*	ATGGAGAAACTGACAATCCTGCTTCTTGTTGCTGCTGTGCTGTTGTCGACCCAGGTCCTGGTTCAAGGTGATGAAGAAAACCCCCACAAGGCGACGACCAAGCTTTTTACAGGAAGAATGTTATCGGGAAATAAGCAAAAAAGGTGTCGCTCGCGTGGGCAACCCTGCAGCTATAATACGGAATGCTGCAGTACTCGTTGTAAACGCCATCAGCATAAATGCTTGTAG	2.48648	1	1
OK193_E_151	Conotoxin precursor	O2	O2-4	OK193A_TRINITY_DN17275_c0_g1_i1_Frame_F3	MAKLTSLLLVAAVLLSTQVLVQGDEENPQKALIDILTGRMVSGKKPKDCLPVGSLCHSSEQCCSGWCPPQRVC*	ATGGCGAAACTGACAAGCCTGCTTCTTGTTGCTGCTGTGCTGTTGTCGACCCAGGTCCTGGTTCAAGGTGATGAAGAAAACCCCCAGAAGGCGCTGATCGACATTTTAACAGGAAGAATGGTATCAGGAAAAAAGCCAAAGGATTGCCTCCCGGTTGGGAGCCTTTGTCATTCAAGTGAGCAATGCTGCAGTGGTTGGTGCCCACCTCAGCGTGTATGCTAA	0.9285	1	1
OK193_E_152	Conotoxin precursor	O2	O2-4	OK193A_TRINITY_DN17275_c0_g1_i4_Frame_F1	MEKLTILLLVAAVLLSTQVLVQGDEENPLKPMIYFILTGRAIPGNTPKSCDQTGEPCVLNEQCCYGWCTNYGTCY*	ATGGAGAAACTGACAATCCTGCTTCTTGTTGCTGCTGTGCTGTTGTCGACCCAGGTCCTGGTTCAAGGTGATGAAGAAAACCCCCTGAAGCCGATGATCTACTTTATATTAACAGGAAGAGCGATACCAGGAAATACGCCAAAGAGTTGTGACCAGACTGGGGAGCCTTGTGTCTTAAATGAGCAATGCTGCTATGGTTGGTGCACAAACTACGGTACATGCTATTAG	2.93857	1	1
OK193_E_153	Conotoxin precursor	O2	O2-10	OK193A_TRINITY_DN194_c0_g1_i2_Frame_R2	MMEKLAMLILGATVLLLIQAIVGGDRGNDEGGWRRFLDLEKRCKNNSEPCTDTSECCNDLECSCLQPAACSDQTRGKCRPR*	ATGATGGAAAAACTAGCAATGCTGATTCTTGGTGCCACTGTCCTGCTGCTGATCCAGGCCATTGTTGGAGGTGACAGAGGTAACGATGAAGGTGGATGGAGAAGATTTTTGGACCTCGAGAAGCGTTGCAAGAACAACAGCGAGCCTTGCACGGACACCAGCGAATGCTGCAATGATTTAGAATGCAGCTGCCTTCAACCGGCTGCCTGCTCTGACCAAACCAGGGGAAAATGTAGACCACGTTAA	68.0792	1	1
OK193_E_154	Conotoxin precursor	O2	O2-WF	OK193A_TRINITY_DN19139_c0_g1_i1_Frame_F3	RDQPADRDAVPRDDKPGGTSGKFMNVLRRSGCPFDPWCG*	AGAGATCAACCTGCAGATCGTGATGCAGTGCCAAGAGACGATAAACCAGGTGGAACGAGTGGAAAGTTCATGAATGTTCTACGTCGGTCTGGATGTCCATTCGACCCTTGGTGTGGCTGA	6.54577	1	0
OK193_E_155	Conotoxin precursor	O2	O2-WF	OK193A_TRINITY_DN25_c0_g1_i17_Frame_R2	MVQGDADQPADRDAVPRDDNPGGTSGKLMNVLIRSGCPWHPWCG*	ATGGTTCAAGGTGATGCAGATCAACCTGCAGATCGTGATGCAGTGCCAAGAGACGATAACCCTGGTGGAACGAGTGGAAAGCTCATGAATGTTCTAATTCGGTCTGGATGTCCGTGGCATCCTTGGTGTGGCTGA	80.7331	1	1
OK193_E_156	Conotoxin precursor	O2	O2-WF	OK193A_TRINITY_DN25_c0_g1_i20_Frame_R2	LSTQVTVQGDRDQPADRNAVPRDDNPGRATRKFMKVLQGRGSECPWKPWCG*	TTGTCGACCCAGGTCACGGTTCAAGGTGACAGAGATCAACCTGCAGATCGTAATGCAGTGCCAAGAGACGATAACCCAGGCAGAGCGACAAGAAAGTTCATGAAAGTTCTGCAAGGACGTGGGTCTGAATGTCCGTGGAAACCTTGGTGTGGCTGA	60.5963	1	0
OK193_E_157	Conotoxin precursor	O3	O3-2	OK193A_TRINITY_DN73_c1_g1_i8_Frame_F2	MSGLGIMVLTLLLLVSMATSHTDRGVGLLMPRDGLQERTCTSDDDCGDLQCCPDTVDKPEGRCDSDCTIY*	ATGTCAGGATTGGGAATCATGGTGCTAACCCTTCTACTTCTTGTGTCCATGGCAACCAGTCATACGGACAGAGGAGTGGGACTGCTGATGCCACGCGACGGGCTCCAAGAGAGAACCTGCACTTCTGACGACGATTGTGGCGATCTGCAATGCTGCCCCGACACAGTGGATAAACCCGAAGGGCGCTGTGATAGTGATTGCACTATCTATTAG	17671.7	1	1
OK193_E_158	Conotoxin precursor	O3	O3-2	OK193A_TRINITY_DN73_c1_g1_i1_Frame_F2	MSGLGIMVLTLLLLVTMATSHEGNRVRRLMLQKKSDTGICKTDPECSTGQVCCSDSLQASDGYCTEANNCISY*	ATGTCAGGATTGGGAATCATGGTGCTAACCCTTCTACTTCTTGTGACCATGGCAACCAGTCATGAGGGTAACAGAGTGAGACGGCTGATGCTTCAGAAGAAGTCTGACACTGGAATCTGCAAAACCGATCCAGAATGCTCCACTGGTCAGGTATGCTGCTCCGACAGCTTGCAGGCTTCAGATGGGTACTGTACTGAAGCAAACAATTGCATTTCATATTAG	146.759	1	1
OK193_E_159	Conotoxin precursor	O3	O3-2	OK193A_TRINITY_DN73_c1_g1_i6_Frame_F2	MSGLGIMVLTLLLLVTMATGHEGNRVKWLMLQEKSDDGICKTDPECSTGQVCCSDSLQASDGYCTEANNCISY*	ATGTCAGGATTGGGAATCATGGTGCTAACCCTTCTACTTCTTGTGACCATGGCAACCGGTCATGAGGGTAACAGAGTGAAATGGCTGATGCTTCAGGAGAAGTCTGACGACGGAATCTGCAAAACCGATCCAGAATGCTCCACTGGTCAGGTATGCTGCTCCGACAGCTTGCAGGCTTCAGATGGGTACTGTACTGAAGCAAACAATTGCATTTCATATTAG	188.651	1	1
OK193_E_160	Conotoxin precursor	O3	O3-3	OK193A_TRINITY_DN311_c0_g2_i2_Frame_F3	MSGLRVVLLALLLLVAMETSLQDAGRGKSMRRHQSQANMYTLMRKMRSCQICATPPDCADCPHTICCIEPDNLEGECHTPCNSG*	ATGTCCGGACTGAGAGTGGTGCTGCTTGCCCTTCTGCTTCTTGTGGCCATGGAAACCAGTCTCCAGGATGCAGGAAGAGGAAAAAGCATGCGACGACATCAGTCACAGGCCAACATGTATACCTTGATGCGTAAAATGAGAAGTTGTCAAATTTGCGCGACCCCCCCGGATTGTGCTGACTGCCCACACACAATATGCTGTATCGAACCCGATAACTTGGAGGGGGAATGCCATACGCCCTGTAATAGCGGGTGA	6254.37	1	1
OK193_E_161	Conotoxin precursor	P	P-1a	OK193A_TRINITY_DN226_c0_g2_i13_Frame_R3	MQLSLTRSALWMLLLLCALGNFVEVQPGQITRDVDNKQLTDNRRDLQSLMKPRTLLRSRGIPPRCGDGCVGGDDCSSQCPFCTHDNLCY*	ATGCAGCTGTCACTGACACGCTCAGCTCTTTGGATGTTGCTTCTGCTATGTGCCTTGGGCAACTTCGTTGAGGTCCAGCCAGGACAGATAACGAGAGATGTGGACAATAAGCAGCTCACGGACAACCGCCGTGACCTGCAATCGCTGATGAAGCCAAGGACTCTCTTGAGGTCACGTGGTATACCACCCAGGTGTGGAGATGGTTGCGTTGGTGGTGATGACTGCTCGTCCCAATGTCCGTTCTGTACGCACGACAATTTATGCTACTGA	192.188	1	1
OK193_E_162	Conotoxin precursor	P	P-1a	OK193A_TRINITY_DN1137_c6_g1_i1_Frame_R1	MHLSLAGSAVLMLLLLFALGVQSGQITRDADNGQLTANRRNLQSLWKKESRSGVYCRSPCSGVPVCPPTCSYCEGTPKICRRSSSTG*	ATGCATCTGTCACTGGCAGGCTCAGCTGTTTTGATGTTGCTTCTGCTGTTTGCCTTGGGGGTCCAGTCAGGACAGATAACAAGGGATGCGGACAATGGACAGCTCACGGCCAACCGCCGTAACCTGCAATCGCTGTGGAAAAAAGAGAGCCGTTCTGGTGTCTATTGTCGATCCCCTTGCTCAGGAGTTCCTGTTTGCCCGCCAACTTGTTCTTATTGCGAGGGTACTCCAAAAATATGCCGAAGAAGCAGCAGCACCGGATGA	3.16287	1	1
OK193_E_163	Conotoxin precursor	P	P-2	OK193A_TRINITY_DN218_c4_g1_i9_Frame_R2	MTLSLARSAVLMLVLLLAFDSFVDVQPRGITRGARSRSGLLSKWYRNAGCSGDVCVSSADCSTCECQFRRCQIWTMDQGSPPS*	ATGACTCTGTCACTGGCGCGTTCAGCTGTTCTGATGCTGGTGCTACTGTTGGCCTTTGACAGCTTTGTTGACGTCCAGCCCAGAGGGATAACAAGGGGTGCGAGAAGCCGCTCTGGCCTGCTATCCAAGTGGTACAGGAATGCGGGGTGTTCAGGTGATGTTTGTGTGTCATCTGCGGACTGCAGCACTTGTGAATGTCAATTCAGGAGGTGCCAGATATGGACAATGGACCAGGGGAGTCCTCCAAGTTGA	3456.42	1	1
OK193_E_164	Conotoxin precursor	Q	Q-1a	OK193A_TRINITY_DN1267_c0_g1_i8_Frame_F1	MHTLEMMLLVLLLLPLATGDGDGRAVGGDRNPNEARSANKRLLKRPARRMDINYCTPCPPALCCQPGSKCGISTHHDHNGEPACL*	ATGCACACACTGGAAATGATGCTGCTCGTCCTGCTTCTGTTGCCCCTGGCAACCGGTGACGGAGATGGACGAGCTGTGGGAGGGGACAGAAACCCCAATGAAGCACGCAGCGCCAACAAACGCCTTCTGAAAAGACCGGCCAGGCGCATGGACATAAACTATTGCACACCCTGTCCCCCTGCTCTCTGCTGCCAGCCTGGATCAAAATGCGGAATATCGACGCATCACGACCATAATGGCGAGCCTGCGTGTTTATGA	1118.77	1	1
OK193_E_165	Conotoxin precursor	Q	Q-1a	OK193A_TRINITY_DN1267_c0_g1_i1_Frame_F3	MHTLEMMLLVLLLLPLATGDGDGRAVGGDRNPNKARSATTRLLQGPARRMDGRDCTPCGPGLCCISGKSCETSTHHDTFGQPACV*	ATGCACACACTGGAAATGATGCTGCTCGTCCTGCTTCTGTTGCCCCTGGCAACCGGTGACGGAGATGGACGAGCTGTGGGAGGGGACAGAAACCCCAATAAAGCACGCAGCGCCACCACACGCCTTCTGCAAGGACCGGCCAGGCGCATGGACGGACGCGATTGCACACCCTGTGGCCCTGGTCTCTGCTGCATTTCTGGAAAAAGCTGCGAAACATCGACGCATCACGACACTTTTGGCCAGCCTGCGTGTGTATAA	1686.57	1	1
OK193_E_166	Conotoxin precursor	Q	Q-1a	OK193A_TRINITY_DN7301_c0_g1_i1_Frame_F2	ARSATTRLLQGPARRTDGNNCTSCGPSLCCSPGLRCGTSTNHKAYDQPACLSY*	GCACGCAGCGCCACCACACGCCTTCTGCAAGGACCGGCCAGGCGCACGGACGGAAACAATTGCACATCCTGTGGCCCTAGTCTCTGCTGCAGTCCTGGATTAAGATGCGGAACATCGACGAATCACAAGGCTTATGACCAACCTGCGTGTTTATCATATTAA	0.826932	1	0
OK193_E_167	Conotoxin precursor	Q	Q-2	OK193A_TRINITY_DN5626_c1_g1_i1_Frame_F1	MSTLGMLLLIALLLPLINPADTEDGQAKPRSRKFRSLDFGSTSMRLDKRGCDPTDGCQTTVCNTEGGPCCCQSGYNCQNTDKHGPACVLVCEHNCPS*	ATGTCCACACTGGGAATGCTGCTGTTGATCGCTCTGCTGCTGCCTCTTATCAACCCTGCAGATACTGAAGATGGTCAAGCGAAGCCAAGAAGCCGGAAGTTCCGTTCACTGGACTTTGGGAGTACCTCCATGCGGCTTGATAAACGAGGTTGTGATCCCACTGACGGCTGTCAGACAACTGTGTGCAACACAGAGGGCGGCCCCTGCTGCTGTCAGTCTGGTTATAACTGCCAAAACACAGACAAACATGGCCCAGCATGTGTTCTTGTCTGTGAGCATAATTGTCCGTCCTAA	10.0601	1	1
OK193_E_168	Conotoxin precursor	Q	Q-3	OK193A_TRINITY_DN546_c10_g1_i1_Frame_R1	MSTLGMMLLILLLLLPLAAFDGDGPTSRGHSSDELLNSMNRRECEQNRNCESGRWCCDDCCTRLDCGCKAKDIGGGVMVQVCDC*	ATGTCAACACTGGGAATGATGCTGCTCATCCTCCTGCTTCTGTTGCCCCTGGCAGCCTTTGATGGTGATGGACCAACAAGCCGCGGGCACAGCAGCGACGAGTTGTTGAACAGTATGAACAGACGCGAGTGCGAACAAAATCGGAATTGCGAAAGTGGCAGGTGGTGCTGTGATGATTGCTGTACAAGGCTAGACTGTGGGTGTAAGGCCAAAGACATTGGTGGTGGGGTTATGGTCCAAGTATGTGACTGCTAA	158.97	1	1
OK193_E_169	Conotoxin precursor	S	S-1a	OK193A_TRINITY_DN4928_c1_g1_i1_Frame_R2	MMSKMGAMFVLLLLLTLASSQQEGDVQARKTSLKSDFYRALSKYNKRRCVFDCGTNCGGSCSCDDAPFDWCSCSGPTSKGCKCTCRCRNPTKC*	ATGATGTCGAAAATGGGAGCTATGTTTGTCCTTTTGCTTCTTTTGACCCTGGCATCCAGCCAGCAGGAGGGAGATGTCCAGGCAAGGAAAACAAGCCTGAAGAGCGACTTCTATCGTGCTCTGTCAAAATATAACAAACGACGATGCGTTTTCGACTGTGGTACGAACTGTGGCGGTTCTTGCAGTTGCGACGACGCCCCATTTGATTGGTGTTCCTGCAGTGGACCAACATCGAAGGGATGCAAATGTACATGTAGATGCAGGAACCCTACAAAATGTTAA	4.96674	1	1
OK193_E_170	Conotoxin precursor	T	T-1	OK193A_TRINITY_DN2002_c0_g2_i1_Frame_R1	ILLLLIPSAPSVDAQRKTKDDVPLASFHDNAKRTLKRLWNKRSCCPQEFLCCLYLVK*	ATTCTTCTGCTGCTGATTCCATCTGCACCCAGCGTTGATGCCCAACGGAAGACCAAAGATGATGTGCCCCTGGCATCTTTCCATGATAATGCAAAGCGAACCCTGAAAAGACTTTGGAACAAACGCTCGTGCTGCCCACAAGAATTTTTATGCTGTCTATACCTGGTGAAATGA	1.69061	1	0
OK193_E_171	Conotoxin precursor	T	T-1	OK193A_TRINITY_DN2002_c0_g1_i7_Frame_R3	MRCLPVFVILLLLIASAPSADARLKTKDDMPLASSHAKVKRMLQILRNKRCCITMELCCEMETD*	ATGCGCTGCCTCCCAGTCTTCGTCATTCTTCTGCTGCTGATTGCATCTGCACCTAGCGCTGATGCCCGATTGAAGACCAAAGATGATATGCCCTTGGCATCTTCCCACGCTAAAGTAAAGCGAATGCTGCAAATACTTCGGAACAAACGCTGCTGCATAACAATGGAACTGTGCTGTGAGATGGAGACTGATTAA	7.57236	1	1
OK193_E_172	Conotoxin precursor	T	T-1	OK193A_TRINITY_DN2002_c0_g1_i10_Frame_R3	MRCLPVFVILLLLIASAPSADARLKTKDDMPLPSSHANIKRTLQMLRNKRCCPGWELCCEWDDVW*	ATGCGCTGCCTCCCAGTCTTCGTCATTCTTCTGCTGCTGATTGCATCTGCACCTAGCGCTGATGCCCGATTGAAGACCAAAGATGATATGCCCTTGCCATCTTCCCACGCTAACATAAAGCGAACCCTGCAAATGCTTCGGAACAAACGCTGCTGCCCAGGCTGGGAATTGTGCTGCGAGTGGGATGATGTGTGGTAA	36.8366	1	1
OK193_E_173	Conotoxin precursor	T	T-1	OK193A_TRINITY_DN2002_c0_g1_i9_Frame_R3	MRCLPVFVILLLLIASAPSADARLKTKDDMPLPSSHANIKRTLQMLRNKRCCPGWELCCEWDEW*	ATGCGCTGCCTCCCAGTCTTCGTCATTCTTCTGCTGCTGATTGCATCTGCACCTAGCGCTGATGCCCGATTGAAGACCAAAGATGATATGCCCTTGCCATCTTCCCACGCTAACATAAAGCGAACCCTGCAAATGCTTCGGAACAAACGCTGCTGCCCAGGCTGGGAATTGTGCTGCGAGTGGGATGAGTGGTAA	2.65423	1	1
OK193_E_174	Conotoxin precursor	T	T-1	OK193A_TRINITY_DN2002_c0_g1_i5_Frame_R3	MRCLPVFVILLLLIASAPSADARLKTKDDMPLPSSHANIKRTLQMLRNKRCCPGWELCCEWDDWW*	ATGCGCTGCCTCCCAGTCTTCGTCATTCTTCTGCTGCTGATTGCATCTGCACCTAGCGCTGATGCCCGATTGAAGACCAAAGATGATATGCCCTTGCCATCTTCCCACGCTAACATAAAGCGAACCCTGCAAATGCTTCGGAACAAACGCTGCTGCCCAGGCTGGGAATTGTGCTGCGAGTGGGATGATTGGTGGTAA	12.8928	1	1
OK193_E_175	Conotoxin precursor	T	T-1	OK193A_TRINITY_DN2002_c0_g1_i3_Frame_R3	MRCLPVFVILLLLVASVPSVDALLKTKDDVPLASSHANVKRTLQILRDKRFCCRTQEVCCEVIKNG*	ATGCGCTGCCTCCCAGTCTTCGTCATTCTTCTGCTGCTGGTTGCATCGGTACCTAGCGTTGATGCCCTATTGAAGACCAAAGATGATGTGCCCTTAGCATCTTCCCACGCTAACGTAAAGCGAACCCTGCAAATACTTCGGGACAAACGCTTCTGCTGCCGAACACAGGAAGTGTGCTGTGAAGTGATTAAAAATGGATGA	3.78564	1	1
OK193_E_176	Conotoxin precursor	T	T-1	OK193A_TRINITY_DN2002_c0_g1_i8_Frame_R3	MRCLPVFVILLLLIASAPTVDAQLKTKDDMPLASFHANVKRTLQILRDKRFCCRTQEVCCEVIKNG*	ATGCGCTGCCTCCCAGTCTTCGTCATTCTTCTTCTGCTGATTGCATCTGCACCTACCGTTGATGCCCAACTGAAGACCAAAGATGATATGCCCTTGGCATCTTTCCACGCTAACGTAAAGCGAACCCTGCAAATACTTCGGGACAAACGCTTCTGCTGCCGAACACAGGAAGTGTGCTGTGAAGTGATTAAAAATGGATGA	4.75854	1	1
OK193_E_177	Conotoxin precursor	T	T-1	OK193A_TRINITY_DN2002_c0_g1_i2_Frame_R3	MRCLPVFVILLLLIASAPSVDARPKTKDDMPLASFHDNAKRILQILQDRNACCIVRQCC*	ATGCGCTGCCTCCCAGTCTTCGTCATTCTTCTGCTGCTGATTGCATCTGCACCTAGCGTTGATGCCCGACCGAAGACCAAAGATGATATGCCCCTGGCATCTTTCCACGATAATGCAAAGCGAATCCTGCAAATACTTCAGGACAGAAATGCTTGCTGCATAGTAAGGCAGTGCTGTTGA	3.01377	1	1
OK193_E_178	Conotoxin precursor	T	T-1	OK193A_TRINITY_DN2002_c0_g1_i1_Frame_R3	MRCLPVFVILLLLIASAPSVDARPKTKDDMPLASFHARPKTKDDMPLASFHDNAKRILQILQDRNACCIVRQCC*	ATGCGCTGCCTCCCAGTCTTCGTCATTCTTCTGCTGCTGATTGCATCTGCACCTAGCGTTGATGCCCGACCGAAGACCAAAGATGATATGCCCCTGGCATCTTTCCACGCCCGACCGAAGACCAAAGATGATATGCCCCTGGCATCTTTCCACGATAATGCAAAGCGAATCCTGCAAATACTTCAGGACAGAAATGCTTGCTGCATAGTAAGGCAGTGCTGTTGA	4.26441	1	1
OK193_E_179	Conotoxin precursor	T	T-1	OK193A_TRINITY_DN28056_c0_g1_i1_Frame_R1	MRWRPFFSILLLLIPSAPSILAQPTTKGDVALASSYDDAKRTLQRLSIKYSCCPGIVSCCVIP*	ATGCGCTGGCGCCCATTCTTCAGCATTCTTCTGCTGCTGATTCCATCTGCACCTAGCATTCTTGCCCAACCGACGACCAAAGGTGATGTGGCCCTGGCATCTTCCTACGATGATGCAAAGCGAACCCTACAAAGATTGTCGATCAAATACAGCTGCTGCCCAGGAATCGTTAGTTGCTGTGTTATTCCATGA	1.31183	1	1
OK193_E_180	Conotoxin precursor	T	T-1	OK193A_TRINITY_DN2002_c0_g1_i4_Frame_R3	MRCLPVLIILLLLTASAPGVDVLPKTEDDVPLSSVYGNGKSILRGILRKGICCGVSFCYPC*	ATGCGCTGTCTCCCAGTCTTGATCATTCTTCTGCTGCTGACTGCATCTGCACCTGGCGTTGATGTCCTACCGAAGACCGAAGATGATGTGCCCCTGTCATCTGTCTACGGTAATGGAAAGAGTATCCTACGAGGAATTCTGAGGAAAGGTATTTGCTGTGGCGTTTCGTTCTGCTATCCATGTTAA	7.12822	1	1
OK193_E_181	Conotoxin precursor	T	T-2-WF	OK193A_TRINITY_DN2065_c0_g1_i5_Frame_R3	MLRLPIFILLVLVLSPAASVPAEPELQTDLTRQSPKDFGMRTKHLPRVPWLRCLFKPGGWGGVRRDQMC*	ATGCTCCGTCTTCCGATCTTCATCCTCCTTGTGCTGGTCCTGTCACCTGCAGCCAGTGTTCCTGCGGAACCAGAGCTGCAAACAGATCTGACTCGGCAATCTCCTAAAGATTTTGGGATGAGAACTAAACACCTACCTCGTGTTCCTTGGCTCCGTTGCCTGTTTAAGCCCGGAGGCTGGGGCGGTGTTCGTCGGGACCAAATGTGTTAA	48.864	1	1
OK193_E_182	Conotoxin precursor	T	T-2-WF	OK193A_TRINITY_DN2065_c0_g1_i1_Frame_R2	MLGLPIFLLLLLVLSPAASVPVDSELQRDLTRRSPKDSGMRTKGVPPWINCPPTPKDCPWDKFGKTSAHK*	ATGCTCGGTCTTCCGATCTTCCTCCTCCTTCTGCTGGTCCTTTCACCTGCAGCTAGTGTTCCTGTGGACTCAGAGCTGCAAAGAGATCTGACTCGTCGATCTCCTAAAGATTCTGGGATGAGAACTAAAGGCGTCCCACCTTGGATCAATTGCCCACCTACGCCCAAAGACTGTCCGTGGGATAAATTCGGAAAAACAAGTGCACATAAATAA	8.80241	1	1
OK193_E_183	Conotoxin precursor	T	T-4	OK193A_TRINITY_DN24038_c0_g1_i1_Frame_R1	MRCLPVVVFLLLLLSAAAAPGVGSKTERLPGLTSSGDSDESLPFLNTICCWSGACCGG*	ATGCGTTGCCTCCCAGTCGTCGTCTTCCTTCTCCTGCTGCTTTCAGCGGCGGCTGCTCCTGGGGTCGGATCGAAAACCGAAAGGCTTCCAGGGCTCACATCATCCGGAGATTCCGACGAGAGTCTCCCCTTTTTGAATACAATTTGCTGTTGGTCCGGCGCTTGCTGTGGTGGCTAA	11.3783	1	1
OK193_E_184	Conotoxin precursor	U	U-1a	OK193A_TRINITY_DN701_c0_g1_i2_Frame_F1	MGFFLTLTVAVLLTSLICTDGAPAKKLEVKSDCSGDCMTCSSDLPCGCCGNVICHSTGICQLVSDPYEDY*	ATGGGATTTTTCCTGACGCTGACTGTTGCTGTGCTTCTGACTTCGCTCATCTGCACTGATGGAGCGCCAGCCAAAAAATTGGAAGTAAAAAGCGATTGCTCTGGGGACTGCATGACATGCAGCAGTGATCTGCCGTGTGGATGCTGCGGCAACGTCATCTGCCACAGCACTGGAATATGCCAGTTGGTCTCAGACCCGTATGAAGATTATTAG	28.6255	1	1
OK193_E_185	Conotoxin precursor	U	U-1b	OK193A_TRINITY_DN701_c0_g1_i1_Frame_F1	MGFFLTLTVAVLLTSLICTEAVPTDEGEVERHFNLAVLGGCRFCVIWCCPPRGVCQSSGCRPAYEALQTGQ*	ATGGGATTTTTCCTGACGCTGACTGTTGCTGTGCTTCTGACTTCGCTCATCTGCACTGAAGCAGTGCCAACTGATGAAGGGGAAGTGGAAAGACACTTCAATCTCGCAGTGCTGGGGGGATGTAGATTTTGTGTAATTTGGTGCTGCCCTCCACGTGGTGTTTGCCAGTCGTCTGGGTGCCGTCCTGCATATGAGGCACTGCAGACTGGACAGTAA	1.22158	1	1
OK193_E_186	Conotoxin precursor	Y	Y-1	OK193A_TRINITY_DN5327_c0_g1_i2_Frame_F2	MQKAIVLILAILLLLPLSTAQDDEGSQENAAPRKRDTASQCGGTGADCNEPEGQNCCTSLKCVNNCCWTTTEGCPS*	ATGCAGAAAGCAATAGTTCTGATTCTGGCCATCCTGCTTTTGTTGCCCCTGTCAACGGCTCAGGATGATGAAGGTAGCCAGGAAAATGCTGCACCGAGAAAAAGAGACACAGCCTCACAGTGTGGTGGAACCGGTGCCGATTGCAATGAACCTGAAGGCCAGAATTGTTGCACCAGCCTGAAGTGCGTTAATAACTGTTGCTGGACAACCACCGAGGGTTGCCCATCATGA	1511.29	1	1
OK193_E_187	Conotoxin precursor	Cerm02		OK193A_TRINITY_DN2707_c0_g1_i2_Frame_F1	MRFLLFLCIAVLLTSFRETEARLPDKAFRQRQSQYIQRIQRCPFCGFTCCSPNYCQGLDCVIVSSNDE*	ATGCGATTTCTTCTCTTTCTGTGCATTGCTGTGCTTCTGACTTCGTTCAGGGAGACAGAAGCGAGACTACCTGATAAAGCATTCAGGCAAAGGCAATCGCAGTACATCCAACGGATCCAACGTTGTCCTTTTTGTGGGTTCACGTGTTGCTCTCCAAACTACTGCCAAGGTCTTGATTGCGTGATTGTTTCAAGCAATGATGAATGA	24.2916	1	1
OK193_E_188	Conotoxin precursor	Cerm03	Cerm03-1	OK193A_TRINITY_DN234_c0_g1_i11_Frame_R2	MKLSMMFILALVLTLSMTDGFIRRAENAGRTFRQRSPHSMDLQTRLIKRIGSCPPDCKKLCLFDGICQE*	ATGAAACTGTCAATGATGTTCATTCTTGCTCTGGTTCTGACCCTGTCCATGACCGATGGCTTCATTCGCCGCGCTGAAAACGCGGGAAGAACCTTTAGGCAGCGCAGTCCCCATTCTATGGATCTGCAAACTCGTCTGATAAAAAGAATTGGCTCATGCCCGCCGGACTGCAAGAAGCTCTGCCTCTTTGACGGCATCTGCCAGGAATGA	263.569	1	1
OK193_E_189	Conotoxin precursor	Cerm03	Cerm03-2	OK193A_TRINITY_DN2043_c0_g1_i4_Frame_F1	MMSVMLIVSLALTLSFTVGINFPGSKAFPWSDTATNRRVRQAAAVSGCVSQCPSGFCDADNTCVVSNGNICSNSI*	ATGATGTCAGTGATGTTGATTGTTAGTCTGGCTCTGACCCTGTCCTTTACCGTTGGGATCAATTTTCCCGGGAGCAAAGCCTTTCCGTGGAGTGACACCGCGACCAACCGACGAGTTCGACAGGCAGCAGCAGTTTCTGGCTGTGTCAGCCAATGTCCGAGTGGATTTTGCGATGCGGACAACACGTGTGTGGTAAGTAACGGTAACATTTGTAGCAACAGTATCTGA	4.35145	1	1
OK193_E_190	Conotoxin precursor	Cerm03	Cerm03-2	OK193A_TRINITY_DN2043_c0_g1_i3_Frame_F1	MMSVMLIVSLVLTLSFTDGINFPRSKAFPWSDTATNRRVRQAAAVSGCVSQCPSGFCDADNTCVPPEEVNRRRRSTPHTK*	ATGATGTCAGTGATGTTGATTGTTAGTCTGGTTCTGACCCTCTCCTTTACCGATGGGATCAATTTTCCCCGGAGCAAAGCCTTTCCGTGGAGTGACACCGCGACCAACCGACGAGTTCGACAGGCAGCAGCAGTTTCTGGCTGTGTCAGCCAATGTCCGAGTGGATTTTGCGATGCGGACAACACGTGTGTGCCTCCCGAGGAAGTCAACAGGCGAAGACGTTCAACTCCACACACGAAATGA	59.8927	1	1
OK193_E_191	Conotoxin precursor	Cerm03	Cerm03-2	OK193A_TRINITY_DN2043_c0_g1_i1_Frame_F1	MMSVMLIVSLALTLSFTVGINFPGSKAFPWSDTATNRRVRQAAAVSGCVSQCPSGFCDADNTCVPPEEVNRRRRSTPHTK*	ATGATGTCAGTGATGTTGATTGTTAGTCTGGCTCTGACCCTGTCCTTTACCGTTGGGATCAATTTTCCCGGGAGCAAAGCCTTTCCGTGGAGTGACACCGCGACCAACCGACGAGTTCGACAGGCAGCAGCAGTTTCTGGCTGTGTCAGCCAATGTCCGAGTGGATTTTGCGATGCGGACAACACGTGTGTGCCTCCCGAGGAAGTCAACAGGCGAAGACGTTCAACTCCACACACGAAATGA	203.835	1	1
OK193_E_192	Conotoxin precursor	Cerm03	Cerm03-3	OK193A_TRINITY_DN837_c0_g1_i3_Frame_R3	MKMSATLIVLLVLGLSFTDGALHRTINGRGASGPHNRDAMGQLIPRGKCGDRCPSGICNVDGTCRD*	ATGAAGATGTCAGCAACGTTGATTGTTCTTCTGGTTCTGGGCCTGTCCTTCACTGATGGTGCCCTTCACCGTACCATCAACGGAAGGGGGGCATCTGGACCGCATAATCGGGATGCAATGGGTCAACTAATCCCGAGGGGGAAATGCGGTGACCGTTGCCCGAGTGGAATTTGCAATGTTGATGGGACTTGTAGGGACTAA	10321.7	1	1
OK193_E_193	Conotoxin precursor	Cerm03	Cerm03-3	OK193A_TRINITY_DN837_c0_g1_i15_Frame_R3	MKMSATLIVLLVLGLSFTDGAPHRTINGREASGPHNRDALVQLILRRTCVGNCTVCPLTRNCKDQ*	ATGAAGATGTCAGCAACGTTGATTGTTCTTCTGGTTCTGGGCCTGTCCTTCACCGATGGTGCCCCTCACCGTACCATCAACGGAAGGGAGGCATCTGGACCGCATAATCGGGATGCATTGGTTCAACTAATCCTGAGGAGGACATGCGTTGGCAACTGCACAGTATGCCCTCTGACTAGGAACTGTAAGGACCAATAG	452.633	1	1
OK193_E_194	Conotoxin precursor	Cerm03	Cerm03-5	OK193A_TRINITY_DN450_c0_g1_i10_Frame_R3	MKLTVMFIVFLMLTMPMASAEITRRTVDEGEAGVLAGDRAANKMALLQERLCPPICNGCPGCY*	ATGAAGCTCACAGTGATGTTCATTGTCTTTCTGATGCTGACCATGCCCATGGCCAGTGCTGAGATTACTCGCCGCACCGTCGACGAGGGAGAGGCCGGTGTGCTCGCAGGCGACAGGGCAGCTAACAAAATGGCGCTCCTGCAGGAAAGACTATGCCCTCCCATTTGCAATGGCTGCCCAGGTTGCTACTGA	69502.7	1	1
OK193_E_195	Conotoxin precursor	Cerm03	Cerm03-5	OK193A_TRINITY_DN19656_c0_g1_i1_Frame_R1	VFLMLTMRMASAEITRRTVDEGEAGVLADDRAANKIALLQERLCTPICNSCPGCY*	GTCTTTCTGATGCTGACCATGCGCATGGCGAGTGCTGAGATTACTCGCCGCACCGTCGACGAGGGAGAGGCCGGTGTGCTCGCAGACGACAGGGCAGCTAACAAAATAGCGCTCCTGCAGGAAAGACTATGCACTCCCATTTGCAATAGCTGCCCAGGTTGCTACTGA	12.2561	1	0
OK193_E_196	Conotoxin precursor	Cerm03	Cerm03-7	OK193A_TRINITY_DN34013_c0_g1_i1_Frame_R2	TDGFIRPAENGGRTFGQHSPDSMDLQMRHIKTRNLCPQCTKGCHVDRKCI*	ACCGATGGCTTCATTCGCCCCGCGGAAAACGGGGGGAGAACCTTTGGGCAGCACAGCCCCGATTCTATGGATCTGCAGATGCGTCACATAAAAACAAGGAATCTGTGCCCTCAGTGCACTAAAGGCTGCCACGTGGACAGGAAATGCATATAG	1.46589	1	0
OK193_E_197	Conotoxin precursor	Cerm06	Cerm06-1	OK193A_TRINITY_DN9964_c2_g2_i1_Frame_F3	MKVVVVLLAVLVVASTAPQKRFFIKDIQNWIQQLQAVFNKAKDKFNELTSGLGVHFDRIVDLLIDQIDSGMTEGACIKVCESSAGKILGNASSMAGMVCAPVCTAALAKLEEVAG*	ATGAAGGTTGTGGTTGTTCTGCTGGCTGTACTGGTGGTGGCCTCCACCGCGCCTCAGAAACGGTTCTTCATAAAAGACATCCAGAATTGGATCCAACAACTGCAGGCCGTTTTCAACAAAGCCAAGGACAAGTTTAACGAACTCACTTCCGGCCTGGGGGTCCACTTCGACAGGATTGTGGACCTGCTGATCGACCAGATTGATTCGGGCATGACGGAGGGAGCCTGCATAAAGGTGTGCGAGTCCAGCGCCGGCAAAATTCTTGGAAACGCTTCCTCCATGGCCGGTATGGTCTGCGCTCCAGTCTGCACAGCTGCCCTGGCTAAACTGGAGGAGGTCGCTGGTTAA	1.61947	1	1
OK193_E_198	Conotoxin precursor	Cerm06	Cerm06-2	OK193A_TRINITY_DN9964_c2_g1_i1_Frame_F3	MKVVVVLLASLVVVAYASPQKRFFIKDINNLLNQLKQTINNAKNQFDQITAGLGVNFDAVVDMLIDQIDSDTTQAACRTICVTGATEILQQAAPLANQVCEPACKAALAKMEEIAG*	ATGAAGGTTGTGGTTGTTCTGCTGGCCTCATTGGTCGTTGTGGCCTACGCCTCGCCACAGAAACGGTTCTTCATCAAAGACATCAACAACCTCCTGAACCAACTGAAACAAACGATCAACAACGCCAAGAATCAGTTTGATCAAATCACAGCCGGCCTGGGTGTCAACTTTGACGCAGTTGTGGACATGCTGATCGACCAGATCGATTCGGACACGACCCAGGCCGCCTGTAGAACCATCTGCGTGACCGGTGCCACTGAGATTCTACAACAGGCTGCGCCTCTTGCCAACCAAGTCTGTGAGCCAGCATGCAAAGCTGCCCTGGCTAAAATGGAAGAAATTGCCGGTTGA	0.434583	1	1
OK193_E_199	Conotoxin precursor	Cerm08		OK193A_TRINITY_DN32444_c0_g1_i1_Frame_R1	GVNCDCIGTSCTKDSAHSINAAGSTLYTCQEISAFRECVGSEAALNSDFSQMNCRCASGVYTISGTAVVCG*	GGTGTAAACTGCGATTGCATTGGCACTAGCTGCACCAAGGACAGTGCCCACTCAATCAATGCAGCCGGCTCGACACTTTACACTTGCCAGGAGATCTCTGCCTTTCGTGAGTGTGTAGGGTCTGAAGCTGCGTTGAACTCCGATTTCAGCCAGATGAACTGCAGATGTGCAAGTGGTGTATACACCATAAGCGGAACTGCCGTTGTATGTGGCTAG	2.57647	1	0
OK193_E_200	Conotoxin precursor	Cerm08		OK193A_TRINITY_DN280_c0_g1_i2_Frame_R3	MMLFMFAAIIFTMASTTVTADTCASAKSVCAWGGQGESCSCSAPHTCTQDDAHKVEVNMGEGVQALYTCKQISDFNVCTGTDAVMDAQFSQLNCRCSSNTYILQNSAVVCG*	ATGATGCTGTTTATGTTCGCTGCCATCATCTTCACCATGGCCTCAACAACAGTCACTGCAGACACGTGTGCAAGTGCTAAGAGTGTGTGCGCATGGGGAGGGCAGGGTGAAAGTTGCAGCTGCTCAGCCCCTCACACCTGCACCCAGGACGATGCCCACAAAGTGGAAGTCAATATGGGAGAAGGCGTCCAGGCACTTTACACTTGCAAGCAGATCTCTGACTTTAACGTGTGTACTGGGACTGATGCTGTGATGGACGCCCAATTTAGCCAGTTGAACTGCAGATGTTCAAGTAACACGTACATCTTACAGAACAGTGCCGTTGTTTGTGGCTAG	1444.21	1	1
OK193_E_201	Conotoxin precursor	Cerm08		OK193A_TRINITY_DN280_c0_g1_i3_Frame_R3	MMLFMFAAIIFTMASTAVTLDTCVSAESVCTWEGQAEPGCNCSAPHTCTKDDDHKIEVTLAEGTQAIYTCKKISDFTGCSETGDVMATDFSQLNCRCSSNKYAIENGTVVCG*	ATGATGCTGTTTATGTTCGCTGCCATCATCTTCACCATGGCCTCAACAGCAGTCACTTTGGACACGTGTGTAAGTGCTGAGAGTGTGTGTACATGGGAAGGGCAGGCTGAACCAGGGTGCAACTGCTCAGCCCCTCACACCTGCACCAAGGACGATGACCACAAAATTGAAGTCACTTTGGCAGAAGGCACCCAGGCAATTTACACTTGCAAGAAGATCTCTGATTTTACCGGGTGTTCGGAGACTGGTGATGTGATGGCCACCGACTTCAGCCAGTTGAACTGCAGATGTTCAAGTAACAAGTACGCCATAGAGAACGGTACCGTTGTTTGTGGCTAG	32.0328	1	1
OK193_E_202	Conotoxin precursor	Cerm10	Cerm10-1	OK193A_TRINITY_DN144_c0_g1_i7_Frame_R1	MKFSTFVMVLMAAVLLTGILETEARRSFTARLKAKRFDQDDYLERVEEICEGTNRDCRGQPDGTTCCRNSHCSQGVCYLNF*	ATGAAATTCTCAACGTTCGTGATGGTCCTGATGGCTGCTGTTCTCCTGACTGGCATCTTGGAGACTGAGGCCAGGAGATCGTTTACAGCTAGACTGAAAGCAAAAAGATTTGATCAGGACGATTATCTGGAAAGGGTGGAAGAGATTTGTGAAGGAACGAATAGAGACTGCCGAGGGCAGCCGGATGGAACTACCTGCTGTCGAAATAGCCACTGCTCCCAAGGTGTATGCTACCTCAACTTCTAA	19908.4	1	1
OK193_E_203	Conotoxin precursor	Cerm10	Cerm10-2	OK193A_TRINITY_DN9173_c0_g1_i1_Frame_R3	MKSTLFLMVLMAAVFLTFFTETATTSIFKATEKRTDSEEFPCAGTFADCRDQPDETICCDTGACYGEVCYY*	ATGAAGTCCACACTCTTCCTGATGGTCCTGATGGCTGCTGTTTTCCTGACGTTCTTCACAGAGACTGCTACAACGTCAATCTTCAAGGCAACAGAAAAAAGAACCGATTCAGAAGAATTCCCGTGTGCGGGCACGTTCGCGGACTGCCGGGACCAGCCTGATGAAACAATCTGCTGCGACACTGGGGCATGCTACGGGGAAGTATGCTATTATTGA	2.57647	1	1
OK193_E_204	Conotoxin precursor	Cerm11	Cerm11-1	OK193A_TRINITY_DN15149_c0_g1_i1_Frame_R2	LVTVALLLALVLSIDSTPADQTETGRVSLRKNDGFPCNSGECACLPRHISSNSYQCQSTTASKHLCVANDCITEDEW*	CTTGTGACTGTGGCGCTGCTTCTGGCTTTGGTCCTGAGTATTGATTCAACGCCTGCCGACCAAACGGAAACTGGAAGGGTTTCCCTACGCAAGAATGACGGATTTCCTTGCAATTCAGGCGAATGTGCATGTCTGCCGAGGCATATATCGTCGAATTCTTACCAGTGCCAATCGACCACAGCCAGTAAACATCTTTGTGTCGCTAACGACTGCATAACGGAAGACGAATGGTGA	1.81251	1	0
OK193_E_205	Conotoxin precursor	Cver01		OK193A_TRINITY_DN726_c1_g1_i1_Frame_R3	MNCLQPLLVLLLISTITALYQDGRATQRGRKTIGTMSNLLNIQTGECSPDCVPHCPNRNECCDGDVCTYSNSLEEWFCIGCGSGGGE*	ATGAACTGTCTTCAGCCGCTGCTGGTTCTTCTCCTGATTTCAACCATCACTGCGTTGTATCAAGATGGTCGGGCAACTCAAAGAGGACGCAAGACCATAGGGACGATGTCCAATCTTTTGAATATTCAGACAGGAGAGTGTTCACCTGACTGTGTTCCCCACTGCCCTAACAGAAACGAGTGCTGCGATGGTGACGTCTGTACATACAGCAACTCATTGGAAGAATGGTTTTGCATTGGCTGTGGATCAGGCGGGGGCGAATAA	4.80756	1	1
OK193_E_206	Conotoxin precursor	Cver02		OK193A_TRINITY_DN152_c0_g1_i3_Frame_F2	MPGRMIVLLAVLLLADLSTSLQDHGEKLLRGKVKVEERESCRTNHNDDCPSGQYCCGLPQESHGVCGRRC*	ATGCCAGGAAGGATGATCGTGCTGCTTGCTGTTCTGCTCCTCGCGGACCTGTCCACCAGTCTGCAGGACCATGGAGAGAAACTTCTGAGGGGAAAGGTCAAGGTCGAAGAGAGGGAAAGCTGTAGAACCAACCACAATGACGACTGCCCATCGGGACAATATTGCTGCGGACTCCCACAGGAGTCTCACGGAGTTTGTGGTAGAAGGTGCTAA	4802.84	1	1
OK193_E_207	Conotoxin precursor	Cver06		OK193A_TRINITY_DN33_c0_g1_i2_Frame_R3	MLSVFTVVWVLTTVMMMTDVTFQSTCNTDNLELCSEATRLCGKGTSWDQCIGLCKCRNEQACTTDADHTVQVIRAPFQNRETYYTCRSLSTMDACQSNERAMSGNSENKYKILCKCDKTYQPRSLNDRKFVCQ*	ATGCTGTCTGTATTCACGGTGGTTTGGGTTTTGACAACGGTAATGATGATGACTGACGTCACATTTCAGTCGACGTGCAACACTGACAACCTGGAGCTGTGCTCAGAGGCCACCCGCCTGTGTGGAAAAGGAACCTCTTGGGACCAGTGCATTGGACTGTGCAAGTGTCGAAACGAGCAGGCCTGCACCACTGACGCTGACCACACGGTCCAAGTCATCCGTGCACCGTTTCAAAATCGCGAGACGTATTACACGTGCAGGAGTCTTTCCACGATGGATGCTTGTCAATCAAACGAGAGAGCTATGAGTGGGAACAGTGAGAACAAGTATAAGATTCTGTGTAAATGTGACAAAACTTACCAGCCACGTTCCTTGAATGATCGGAAATTCGTCTGTCAG…	35.5641	1	1
OK193_E_208	Conotoxin precursor	Cver06		OK193A_TRINITY_DN33_c0_g1_i3_Frame_R2	MLSVFTVVWVLTTVMMMTDVTFQSTCNTDNLELCSEATRLCGNRTSWDRCNGLCKCPKDQACITDDDHTVQVIRAPFQNRETYYTCRSLSTMDACQSNERAMSGNSENKYKILCKCDKTYQPRSLNDRKFVCQ*	ATGCTGTCTGTATTCACGGTGGTTTGGGTTTTGACAACGGTAATGATGATGACTGACGTCACATTTCAGTCGACGTGCAACACTGACAACCTGGAGCTGTGCTCAGAGGCCACCCGCCTGTGTGGAAACAGAACCTCTTGGGACCGGTGCAATGGACTGTGCAAGTGTCCAAAAGACCAGGCCTGCATCACTGACGATGACCACACGGTCCAAGTCATCCGTGCACCGTTTCAAAATCGCGAGACGTATTACACGTGCAGGAGTCTTTCCACGATGGATGCTTGTCAATCAAACGAGAGAGCTATGAGTGGGAACAGTGAGAACAAGTATAAGATTCTGTGTAAATGTGACAAAACTTACCAGCCACGTTCCTTGAATGATCGGAAATTCGTCTGTCAG…	37.142	1	1
OK193_E_209	Conotoxin precursor	Ggeo01		OK193A_TRINITY_DN237_c2_g1_i9_Frame_R1	MSRLFLILLAISVITVWVDAFQADDSGLDKKSRPLSRAARDRANSNFFGKLQAAEHDRHRRFLLEQLSDNPHAKHHHNM*	ATGTCACGCCTCTTCCTCATTCTTCTGGCCATTTCTGTCATCACTGTGTGGGTCGATGCATTCCAGGCTGATGACAGTGGCCTTGACAAGAAGTCCAGACCATTGTCACGTGCCGCCAGGGACCGCGCCAACTCTAACTTCTTCGGGAAACTTCAGGCCGCTGAGCATGACAGACATCGACGTTTTCTGCTCGAACAGCTATCCGACAACCCCCACGCCAAGCACCACCACAACATGTAA	4235.65	1	1
OK193_E_210	Conotoxin precursor	Ggeo01		OK193A_TRINITY_DN237_c2_g1_i6_Frame_R3	MSRLFLILLAISVITVWVDAFQADDSGLDKKSRPLSRAARDRANSNFFGKLQAAELDRHRRILTETPFNSPNANHYHKVQHF*	ATGTCACGCCTCTTCCTCATTCTTCTGGCCATTTCTGTCATCACTGTGTGGGTCGATGCATTCCAGGCTGATGACAGTGGCCTTGACAAGAAGTCCAGACCATTGTCACGTGCCGCCAGGGACCGCGCCAACTCTAACTTCTTCGGGAAACTTCAGGCCGCAGAGCTTGACAGACATCGACGTATATTGACCGAAACTCCATTTAACAGCCCCAACGCCAACCACTACCACAAAGTGCAACATTTCTAA	3811	1	1
OK193_E_211	Conotoxin precursor	Ggeo01		OK193A_TRINITY_DN237_c2_g1_i2_Frame_R1	MSRLFLILLAISVITVWVDAFQADDSGLDKKSRPLSRAARDRANSNFFGKLQAAELDRHRRFLIAAPFYSPNANHYHKMQLFEPHLKKADSKSL*	ATGTCACGCCTCTTCCTCATTCTTCTGGCCATTTCTGTCATCACTGTGTGGGTCGATGCATTCCAGGCTGATGACAGTGGCCTTGACAAGAAGTCCAGACCATTGTCACGTGCCGCCAGGGACCGCGCCAACTCTAACTTCTTCGGGAAACTTCAGGCCGCTGAGCTTGACAGACATCGACGTTTTCTGATCGCCGCTCCATTTTACAGCCCCAACGCCAACCACTACCACAAAATGCAACTTTTCGAACCACATCTCAAAAAAGCCGATTCTAAAAGTCTGTAA	6431.33	1	1
OK193_E_212	Conotoxin precursor	Ggeo01		OK193A_TRINITY_DN3043_c6_g1_i1_Frame_R2	MSRLFLVLLAISVLTLHTDSIQDHDGGADKSSGPVARAARDKVSPALFRKFRARANVRSRRIGRAVEDFPGAEEEEEDEELDDGRKALLAKKIKNKFFHLYHLHRL*	ATGTCACGCCTGTTCCTAGTTCTTCTGGCGATCTCTGTCCTCACTCTCCACACTGACTCCATCCAGGACCATGACGGTGGTGCGGACAAGAGCTCCGGACCTGTGGCACGTGCTGCCAGAGACAAGGTCTCCCCTGCCCTCTTCCGCAAGTTCCGGGCCCGCGCCAACGTCCGCAGCCGGAGAATCGGACGCGCTGTTGAAGACTTTCCCGGCGCTGAGGAGGAGGAAGAGGATGAGGAGTTGGACGATGGAAGGAAAGCTCTACTGGCCAAGAAGATTAAGAATAAGTTTTTCCACCTCTACCACCTTCATAGGCTGTAA	16.8594	1	1
OK193_E_213	Conotoxin precursor	Ggeo01		OK193A_TRINITY_DN41433_c0_g1_i1_Frame_R3	MSRLFLVLLVISVITLHTDSSQGTDGSTDVGSGPSHGYQRKLRVRIFRRTSFDDKTGSEQEEEEEP*	ATGTCACGCCTCTTCCTGGTTCTTCTAGTGATTTCTGTTATCACTCTCCACACTGACTCATCCCAGGGTACTGACGGTAGCACTGACGTGGGGTCCGGGCCCAGTCATGGTTATCAGCGCAAACTCCGGGTCCGCATCTTCCGCAGAACGAGCTTTGATGACAAGACTGGTTCAGAGCAGGAAGAGGAGGAAGAGCCTTAA	8.70419	1	1
OK193_E_214	Conotoxin precursor	Ggeo01		OK193A_TRINITY_DN2161_c0_g2_i1_Frame_F1	MSRLFLLLVAISVITVWLDASQTDDSSTEKRSRSMPDVDFNLQFDKIGDSSDFGQEFPKGK*	ATGTCACGCCTCTTCCTCCTTCTTGTGGCGATTTCTGTCATCACTGTGTGGCTTGATGCATCCCAGACTGATGACAGTAGCACTGAGAAGAGGTCCAGGTCAATGCCAGATGTTGACTTCAATCTACAGTTTGACAAAATTGGGGACTCCAGTGACTTTGGCCAAGAATTCCCGAAGGGCAAGTAA	8.83899	1	1
OK193_E_215	Conotoxin precursor	Ggeo01		OK193A_TRINITY_DN237_c2_g2_i1_Frame_R2	MPRLFLILLAISVITLKADASRADDGGPDNWSRLLSRAAGDNAYSGFSRKLLQAAIKRRDAVDDPAALPTESPGRSINSQQNL*	ATGCCACGCCTCTTCCTGATTCTTCTGGCGATTTCTGTCATCACTCTGAAGGCTGATGCGTCCCGGGCTGATGACGGGGGTCCTGACAATTGGTCCAGGCTGTTGTCACGTGCTGCCGGGGACAACGCCTACTCTGGCTTCTCCAGGAAACTTCTTCAGGCCGCCATCAAGCGACGTGACGCGGTGGACGACCCAGCAGCCCTTCCCACAGAGTCCCCCGGACGATCCATAAACTCCCAACAGAATCTGTAG	6.57008	1	1
OK193_E_216	Conotoxin precursor	Ggeo03	Ggeo03-2	OK193A_TRINITY_DN59_c1_g2_i1_Frame_F3	MKMYLCLAIVLLLASAIAGSPLDQTETARKERDPQTCKECKCSNLKVGICVQPNRCSGACGDGCTNGCKCSQLFSGTCTQRSNCHDKVC*	ATGAAAATGTACCTGTGTCTTGCTATTGTTCTGCTCCTGGCTTCTGCCATAGCTGGTTCACCACTTGATCAAACGGAAACTGCAAGAAAAGAAAGAGATCCACAAACGTGTAAGGAATGCAAGTGCAGCAACTTAAAAGTGGGCATATGCGTACAGCCCAACCGTTGCAGTGGTGCTTGTGGTGACGGATGTACAAACGGTTGCAAGTGTTCTCAATTATTTTCAGGAACATGCACACAAAGGTCTAATTGCCATGATAAAGTGTGTTGA	1059.85	1	1
OK193_E_217	Conotoxin precursor	Ggeo03	Ggeo03-2	OK193A_TRINITY_DN59_c1_g2_i2_Frame_F3	MKMYLCLAIVLLLASAIAGSPLDQTETARKERDPEVCDECKCSYLKVGKCVEPSHCSGACGDGCTNGCKCSQLFSGTCTQRSNCHDKVC*	ATGAAAATGTACCTGTGTCTTGCTATTGTTCTGCTCCTGGCTTCTGCCATAGCTGGTTCACCACTTGATCAAACGGAAACTGCAAGAAAAGAAAGAGATCCAGAAGTGTGTGATGAATGCAAATGCAGCTACTTAAAAGTGGGCAAATGCGTAGAGCCCAGCCATTGCAGTGGTGCTTGTGGTGACGGATGTACAAACGGTTGCAAGTGTTCTCAATTATTTTCAGGAACATGCACACAAAGGTCTAATTGCCATGATAAAGTGTGTTGA	1911.15	1	1
OK193_E_218	Conotoxin precursor	Pmag02		OK193A_TRINITY_DN6401_c0_g1_i2_Frame_R1	MKAVAVFMIVSLAVAYGQFFCPESENDPLNCLETQPNSATCMQSSDDQSYSYVCGYCGKKKETCFGNKAAVQDYYCQRNGIANTCGGAAQ*	ATGAAGGCTGTGGCTGTGTTTATGATTGTCTCCCTTGCTGTGGCTTACGGCCAGTTCTTCTGCCCGGAGAGTGAGAATGACCCCCTGAACTGCCTGGAGACCCAGCCCAACTCCGCCACCTGCATGCAGTCCAGCGACGATCAGTCCTACTCCTATGTGTGCGGCTACTGCGGCAAGAAGAAGGAGACTTGCTTCGGGAACAAAGCGGCGGTACAGGATTACTACTGCCAGAGAAACGGCATCGCCAACACCTGCGGCGGCGCCGCTCAGTGA	54.2703	1	1
OK193_E_219	Conotoxin precursor	Pmag02		OK193A_TRINITY_DN235_c5_g1_i1_Frame_F3	MKTVAVFLVVALAVAYGQFFCPDSEDDPLNCLETQATSATCMKSTEDETYSYVCGYCGKKKESCFGKKVPTSDYNCQIHKIPNHCGGPVM*	ATGAAGACTGTGGCTGTGTTCCTGGTTGTCGCCCTTGCTGTGGCTTATGGGCAGTTCTTCTGCCCGGATAGCGAAGACGATCCCCTGAACTGCCTGGAGACTCAGGCGACCAGTGCCACGTGCATGAAGTCAACGGAGGATGAGACCTACTCCTATGTGTGCGGCTACTGCGGCAAGAAAAAGGAGTCTTGTTTCGGCAAGAAAGTGCCAACGTCTGACTACAACTGCCAGATTCACAAGATCCCGAACCACTGCGGCGGCCCTGTCATGTGA	35685.4	1	1
OK193_E_220	Conotoxin precursor	Pmag02		OK193A_TRINITY_DN6401_c0_g2_i1_Frame_R3	MKAVAVFLVVALAVAYGQFFCPDSENDPLNCIETKATAATCMKSKTDGSYSYACGYCGKKKESCFGDKVPVTDYNCQTRKIANPCGGPAL*	ATGAAGGCTGTGGCTGTGTTTCTGGTTGTCGCCCTTGCTGTGGCTTATGGCCAGTTCTTCTGCCCGGATAGCGAAAATGACCCCCTGAACTGCATTGAGACCAAGGCGACCGCTGCCACTTGCATGAAGTCCAAGACGGATGGATCCTACTCCTATGCCTGCGGCTACTGCGGCAAGAAGAAGGAGAGCTGTTTCGGCGACAAAGTGCCAGTGACTGACTACAACTGCCAGACGCGGAAGATTGCCAACCCCTGCGGCGGCCCTGCTCTCTGA	360.889	1	1
OK193_E_221	Conotoxin precursor	Pmag02		OK193A_TRINITY_DN6401_c2_g1_i1_Frame_F1	MKNVAVFLAVALAVAYGQFFCPDSENDPLNCVETMATTATCMQSKKDKSYSYACGYCGKKKEHCFGNKVAVQDYYCQ	ATGAAGAATGTGGCTGTGTTTCTGGCTGTCGCCCTTGCTGTGGCTTATGGACAGTTCTTCTGCCCGGATAGTGAGAACGATCCCCTGAACTGCGTTGAGACCATGGCGACTACTGCCACGTGCATGCAGTCCAAGAAGGATAAATCCTACTCCTATGCGTGCGGCTACTGCGGCAAGAAGAAAGAGCACTGCTTCGGAAACAAAGTGGCTGTTCAGGACTACTACTGCCAG	2.37785	0	0
OK193_E_222	Conotoxin precursor	Pmag02		OK193A_TRINITY_DN17922_c0_g1_i1_Frame_F3	ETQATSATCMKSTEDETNSYVCGYCDKKKEAFFGKKVPSSDYNCQIHNIPNHCDAPVM*	GAGACTCAGGCGACCAGTGCTACGTGCATGAAGTCAACGGAGGATGAGACCAACTCCTATGTGTGCGGCTACTGCGACAAGAAAAAGGAGGCTTTTTTCGGCAAGAAAGTGCCATCGTCTGACTACAACTGCCAGATTCACAATATCCCGAACCACTGCGACGCCCCTGTCATGTGA	118.334	1	0
OK193_E_223	Conotoxin precursor	Rimp01		OK193A_TRINITY_DN26_c0_g1_i1_Frame_R1	MARLLSMLLCIAVAVVLAAGIQYSAESPMQQCSTHAVSKMEVYSNNQGKYELLDSYCSCDSGEAYFDAQDTTTSSSTVSSYKIYVCGMPTESCTGGTLPVTDSDNGPRRMQCTCGQYKYLVSASLGWHVRCK*	ATGGCGCGCTTGCTGTCCATGCTACTATGCATCGCCGTGGCAGTGGTCCTGGCTGCAGGCATACAATATTCAGCTGAAAGTCCGATGCAGCAGTGCAGCACGCACGCTGTCAGTAAAATGGAGGTGTACTCGAACAACCAGGGCAAATATGAACTCCTTGACTCGTACTGCTCCTGTGACAGCGGCGAGGCCTACTTTGACGCCCAGGACACCACCACAAGCTCCTCCACGGTGTCATCATACAAAATCTACGTGTGCGGTATGCCAACAGAGTCGTGTACGGGAGGAACCTTACCAGTGACTGATTCGGACAATGGGCCACGAAGGATGCAATGCACATGCGGACAGTACAAGTATTTAGTCTCCGCCAGTTTGGGATGGCATGTTCGTTGCAAGTAG	4218.97	1	1
OK193_E_224	Conotoxin precursor	Rimp03		OK193A_TRINITY_DN32432_c0_g1_i1_Frame_F1	LVAKREIPLSCVSPQTPNLVGSWEDQKCCYTMQCSPTTCCSTSACSCDGTVCRC*	CTTGTTGCAAAGCGCGAAATTCCACTTAGTTGTGTCTCCCCTCAAACTCCAAATCTTGTCGGCTCGTGGGAAGATCAAAAGTGTTGCTACACCATGCAGTGCAGTCCAACAACTTGCTGTTCCACCTCGGCCTGTTCTTGCGATGGCACGGTGTGCAGATGCTAG	1.17309	1	0
OK193_E_225	Conotoxin precursor	Rimp05		OK193A_TRINITY_DN7926_c0_g1_i1_Frame_R2	MMKTGLIICLLLIAFMTGDGSPGNTMYRRKETGFASGIKRYQKNFFRRNCDNCPEEPCCYGDKCMSDPGHEPFCGN*	ATGATGAAGACTGGCTTGATCATCTGTCTGCTTTTGATTGCCTTTATGACTGGTGATGGTTCCCCTGGAAATACCATGTATAGGCGGAAGGAAACAGGCTTTGCATCCGGCATAAAAAGATATCAAAAAAACTTTTTTCGGAGGAACTGTGATAACTGTCCCGAGGAACCGTGCTGCTATGGTGACAAGTGCATGTCCGATCCCGGCCATGAACCTTTTTGCGGGAACTAA	41.9521	1	1
OK193_E_226	Conotoxin precursor	SF-mi1		OK193A_TRINITY_DN135_c0_g1_i17_Frame_R2	MSKTGIVLVVLYLLSSPVNLQQNEDDKAFSEIESPTLTRVLRCQKCKPNSSGFCEGTCCKAAFTCQAGHWGCSCVTGTHDYGLTTSG*	ATGTCGAAAACGGGAATTGTGCTGGTTGTCCTGTACCTTCTTTCTTCTCCAGTAAACCTTCAGCAGAATGAAGATGACAAGGCTTTCTCCGAGATCGAGAGCCCTACACTGACGCGTGTTCTGAGATGCCAAAAATGCAAACCCAATTCTTCCGGATTTTGCGAGGGGACCTGCTGTAAGGCTGCCTTCACCTGCCAGGCAGGCCACTGGGGATGTTCGTGTGTCACCGGGACACACGATTACGGATTAACAACGTCAGGCTAG	1128.26	1	1
OK193_E_227	Conotoxin precursor	SF-mi2	SF-mi2 01	OK193A_TRINITY_DN683_c1_g1_i3_Frame_F1	MRFYLLLTVTLLLTLSTGGDAGPRRANGLPKHFVLRTCTGNCRLCGAICCCEPKVCRNNQCIYDE*	ATGAGATTTTACCTGCTGCTGACCGTCACGCTGCTTCTGACATTGTCCACTGGTGGTGATGCTGGACCGAGGCGTGCTAATGGCTTACCAAAACATTTCGTACTTCGTACTTGCACAGGGAACTGTCGTCTATGTGGCGCCATATGTTGTTGTGAACCCAAGGTTTGCAGAAATAACCAATGCATATATGACGAGTGA	108975	1	1
OK193_E_228	Conotoxin precursor	SF-mi2	SF-mi2 01	OK193A_TRINITY_DN10976_c0_g1_i1_Frame_R1	MRFYLLLTVTLLLTLSTGGDAGPRRANGLPKHCVLRTCTGNCRLCGAICCCE	ATGAGATTTTACCTGCTGCTGACCGTCACGCTGCTTCTGACATTGTCCACCGGTGGTGATGCTGGACCGAGGCGTGCTAATGGCTTACCAAAACATTGCGTACTTCGTACTTGCACGGGGAACTGTCGTCTATGTGGCGCCATATGTTGTTGTGAA	38.0847	0	0
OK193_E_229	Conotoxin precursor	SF-mi2	SF-mi2 01	OK193A_TRINITY_DN683_c1_g1_i13_Frame_F1	LTVTLLLTLSTGGAAGPRRAIGLPKHFVLRTCPEDCRPCGTSRTCCCDPKVCSNNQCI*	CTGACCGTCACGCTGCTTCTGACTTTGTCCACTGGTGGTGCTGCTGGACCGAGGCGTGCTATTGGCTTACCAAAACATTTCGTACTTCGTACTTGCCCAGAGGACTGTCGTCCATGTGGCACCTCTCGTACATGTTGTTGTGACCCCAAGGTTTGCAGTAATAACCAATGCATATGA	7410.26	1	0
OK193_E_230	Conotoxin precursor	SF-mi2	SF-mi2 01	OK193A_TRINITY_DN22755_c0_g1_i1_Frame_R2	AGPRRGNGLPKHLDLRTCTGKCRLCGAICCCESKVCSNNQCIYDE*	GCTGGACCGAGGCGTGGTAATGGCTTACCAAAACATCTCGACCTTCGTACTTGCACAGGGAAGTGTCGGCTATGTGGCGCCATATGTTGTTGTGAATCCAAGGTTTGCAGTAATAACCAATGCATATATGACGAGTGA	7.97926	1	0
OK193_E_231	Conotoxin precursor	SF-mi2	SF-mi2 01	OK193A_TRINITY_DN6634_c0_g1_i4_Frame_F2	MRFYLLLIVTLLLTLSTGGDDGPSFAKGLQKHFVRRDCGRGCVGCDNHNQCCCGGQVCVNGTRCGPPPG*	ATGAGATTTTACCTATTGTTGATCGTCACGCTGCTTCTGACATTGTCCACTGGTGGTGATGATGGACCAAGCTTTGCTAAAGGGTTACAAAAACATTTCGTACGTAGAGATTGCGGAAGAGGCTGTGTTGGATGTGACAACCATAATCAATGTTGTTGTGGTGGCCAAGTTTGCGTAAATGGTACCCGTTGCGGGCCTCCCCCCGGGTGA	4.86544	1	1
OK193_E_232	Conotoxin precursor	SF-mi2	SF-mi2 01	OK193A_TRINITY_DN40731_c0_g1_i1_Frame_F2	MRCHLLLTIALLLTSFNGGDAGPMQAYRHFVRRDCQTGCVGCNNPNGCCCGGQVCVDDTRCE*	ATGAGATGTCACCTGCTGCTGACCATTGCGCTGCTTCTGACATCGTTCAATGGCGGTGATGCGGGACCAATGCAAGCTTATCGGCATTTCGTACGTAGAGATTGCCAAACCGGCTGTGTTGGATGTAACAACCCTAATGGATGTTGTTGTGGTGGCCAAGTTTGCGTAGATGATACAAGATGCGAATGA	133.502	1	1
OK193_E_233	Conotoxin precursor	SF-mi2	SF-mi2 02	OK193A_TRINITY_DN57_c0_g1_i3_Frame_R1	MEFRRLVTVALLLALVLSIDAEPMQGMEAEGHFVRTDCEEDCGTCGSGCCCAPDSCIDSRCRSHVGPN*	ATGGAATTTCGCCGGCTTGTGACTGTGGCGCTGCTTCTGGCTTTGGTCCTGAGTATTGATGCGGAGCCAATGCAAGGAATGGAAGCAGAAGGACATTTCGTACGTACAGATTGCGAGGAAGACTGTGGGACGTGCGGCAGTGGATGTTGTTGTGCCCCCGACAGTTGCATAGACAGCCGATGCCGGAGTCACGTGGGGCCAAACTGA	21960.1	1	1
OK193_E_234	Conotoxin precursor	Tand01		OK193A_TRINITY_DN1087_c0_g1_i2_Frame_F3	MKSAVSMMALSMSIFTGFTMASATPDVLCITPVGQLSELCTTIGGTCAEYYHWKGKNNCSRFCECDVGVACPTDEAHAIVRGTVKRPLTHYTCEPITEFPKCEVDDVAIVNSGPGLRRVVKCICPWKYMYDGNSSHICKD*	ATGAAGTCAGCAGTCTCCATGATGGCGCTGTCTATGTCCATTTTCACTGGCTTTACGATGGCATCAGCAACACCAGACGTGCTTTGCATCACTCCGGTTGGCCAGCTTTCCGAATTGTGTACTACAATCGGCGGAACGTGTGCTGAATATTACCACTGGAAAGGTAAAAACAACTGCTCCCGTTTCTGCGAATGCGACGTCGGAGTGGCCTGCCCTACTGATGAAGCTCATGCAATCGTACGCGGCACCGTGAAACGTCCCTTGACTCATTACACGTGCGAGCCGATCACAGAATTTCCAAAATGTGAAGTGGACGATGTTGCTATAGTGAATTCTGGTCCCGGACTCCGCAGGGTGGTCAAATGCATCTGTCCCTGGAAGTACATGTATGACGGCAAT…	313.793	1	1
OK193_E_235	Conotoxin precursor	Tpra06		OK193A_TRINITY_DN9_c0_g1_i30_Frame_R2	MLSMLAWTLMTAMVVMNAHGQVCPTMTDSYTGENECFYDNNLCGKEVSGSCSSLCNCKNSQECSTDSDHTITVVKRYVNNQPERKRYYTCVALSSLNECAVREKALFVLAPEAADPISVKVLCRCPFPKVYLQTGRSRPHICSYNPRRRG*	ATGCTGTCGATGCTCGCATGGACTTTGATGACAGCAATGGTGGTGATGAATGCTCATGGTCAAGTTTGCCCTACTATGACAGACAGCTATACTGGGGAAAACGAATGTTTTTATGACAATAACCTGTGCGGAAAGGAAGTGTCGGGGAGCTGCTCATCTCTGTGCAACTGTAAAAACAGCCAGGAGTGTTCCACGGACAGCGATCACACCATTACTGTCGTGAAACGTTACGTAAACAATCAACCTGAAAGGAAGAGGTATTACACGTGCGTGGCTCTTTCTTCATTAAACGAATGTGCCGTCCGCGAGAAAGCCCTGTTCGTTTTAGCTCCTGAAGCCGCAGATCCAATAAGTGTGAAGGTTCTTTGTCGATGTCCATTTCCAAAAGTGTACCTTCAG…	6079.01	1	1
OK193_E_236	Conotoxin precursor	Tpra06		OK193A_TRINITY_DN9_c0_g1_i17_Frame_F1	MLSMLAWTLMTAMVVMNAHGQVCPTMTDSYTGENECFYDNNLCGKEVSGSCSSLCNCKNSQECSTDSDHTITVVKRYVNNQPERKRYYTCVALSSLNECSGTQEALYVLTPEANELKSVKVLCRCPSTKVYLLARNPQRYVCTTAAPLSTRTT*	ATGCTGTCGATGCTCGCATGGACTTTGATGACAGCAATGGTGGTGATGAATGCTCATGGTCAAGTTTGCCCTACTATGACAGACAGCTATACTGGGGAAAACGAATGTTTTTATGACAATAACCTGTGCGGAAAGGAAGTGTCGGGGAGCTGCTCATCTCTGTGCAACTGTAAAAACAGCCAGGAGTGTTCCACGGACAGCGATCACACCATTACTGTCGTGAAACGTTACGTAAACAATCAACCTGAAAGGAAGAGGTATTACACGTGCGTGGCTCTTTCTTCATTAAACGAATGTTCCGGCACCCAGGAAGCCCTGTACGTTTTAACTCCTGAAGCCAACGAACTAAAAAGTGTGAAGGTTCTTTGTCGATGTCCATCTACAAAAGTGTACCTTCTC…	7271.19	1	1
OK193_E_237	Conotoxin precursor	Tpra06		OK193A_TRINITY_DN2870_c0_g1_i2_Frame_F3	MLSMLAWTLMTAMVVMNAHGQVCPTMTDSYARENECHYDHNLCGKEVSGSCSSLCNCKNSQECSTDSDHSITVVKRYVNNQPERK	ATGCTGTCGATGCTCGCATGGACTTTGATGACAGCAATGGTGGTGATGAATGCTCATGGTCAAGTTTGCCCTACTATGACAGACAGCTATGCTAGGGAAAACGAATGTCATTATGACCATAACCTGTGCGGAAAGGAAGTGTCGGGGAGCTGCTCATCTCTGTGCAACTGTAAAAACAGCCAGGAGTGTTCCACGGACAGCGATCACTCCATTACTGTCGTGAAACGTTACGTAAACAATCAACCTGAAAGGAAG	11771.4	0	0
OK193_E_238	Conotoxin precursor	Tpra06		OK193A_TRINITY_DN9_c0_g1_i2_Frame_R2	MLSMLAWTLMTAMVVMNAHGQVCPTMTDSYTGENECFYDNNLCGKEVSGSCSSRCYCKNGGRCSTDSDHTITVVQSYINGYPEKRYYTCV	ATGCTGTCGATGCTCGCATGGACTTTGATGACAGCAATGGTGGTGATGAATGCTCATGGTCAAGTTTGCCCTACTATGACAGACAGCTATACTGGGGAAAACGAATGTTTTTATGACAATAACCTGTGCGGAAAGGAAGTGTCGGGCAGCTGCTCATCTCGGTGCTACTGTAAAAACGGGGGGAGGTGTTCCACGGACAGCGATCACACCATTACTGTCGTGCAAAGTTACATAAACGGTTACCCTGAAAAGAGGTATTACACGTGCGTG	18573.4	0	0
OK193_E_239	Hormone	Conopressin/Conophysin	Conopressin/Conophysin-1	OK193A_TRINITY_DN1299_c0_g1_i1_Frame_R3	MTRSAMQMGRLTLVLCLLLLLLLTTQACFIRNCPKGGKRDVDERQLVNACMFCSFGQCVGPHICCGDGGCQMGTPEASRCSQEDESPIPCQVIGNHCALNNPGNIHGHCVAYGICCVDDTCTTHPGCL*	ATGACGCGCTCAGCCATGCAGATGGGGCGACTGACGTTGGTGCTCTGTTTGCTGTTGCTGCTATTGCTCACTACTCAGGCTTGCTTCATCAGAAACTGCCCAAAAGGTGGCAAGAGAGATGTGGACGAAAGACAACTTGTGAATGCGTGCATGTTCTGTAGCTTTGGCCAGTGCGTGGGGCCCCATATCTGCTGTGGAGATGGAGGATGCCAAATGGGAACCCCAGAAGCGAGCAGGTGCAGCCAAGAGGACGAGAGTCCTATTCCTTGCCAAGTCATTGGTAACCACTGCGCTCTTAACAACCCAGGCAACATCCACGGCCACTGTGTGGCTTATGGCATCTGCTGTGTGGATGATACTTGTACCACCCACCCGGGATGTCTGTAG	4.15806	1	1
OK193_E_240	Hormone	Conopressin/Conophysin	Conopressin/Conophysin-1	OK193A_TRINITY_DN1299_c0_g1_i3_Frame_R3	MARSAMQIGRLTLVLCLLLLLLLTTQACFIRNCPPGGKSDVDERQPVNACMFCSFGQCVGPHTCCGDGGCETGTPEANNCSQEDESPIPCQVIGDHCALNNISNIHGHCVANGTCCVDDTCTTHPGCL*	ATGGCGCGCTCAGCCATGCAGATTGGGCGACTGACGTTGGTGCTGTGTTTGCTGTTGCTGCTACTGCTCACTACCCAGGCTTGCTTCATCAGAAACTGCCCACCAGGTGGCAAGAGTGATGTGGACGAAAGACAACCTGTGAATGCGTGCATGTTCTGTAGCTTTGGCCAGTGCGTGGGGCCCCATACCTGCTGTGGAGATGGAGGATGCGAAACTGGAACCCCAGAAGCGAACAACTGCAGCCAAGAGGACGAGAGTCCTATTCCTTGCCAAGTCATTGGTGACCACTGCGCTCTGAACAACATAAGCAACATCCACGGCCACTGTGTTGCTAATGGCACCTGTTGTGTGGATGATACTTGTACCACCCACCCGGGATGTCTGTAG	68.576	1	1
OK193_E_241	Hormone	Conopressin/Conophysin	Conopressin/Conophysin-2	OK193A_TRINITY_DN28134_c0_g1_i1_Frame_F2	MKCSVLQMSRLSWAMCLMLLMLLLLGTAQGCFIRNCPRGGKRAVDAMQPTRQCMSCGPEGVGQCVGPNVCCGLGLGCLMGTPETEVCQKENESSVPCAISGRRCGMDNTGNCVADGICCVEDACSFNSLCRVDTDQEDSVSARQELLTLIRRLLVNRQYD*	ATGAAGTGTTCAGTTCTGCAGATGAGCCGCCTGTCCTGGGCCATGTGTCTGATGCTGCTGATGCTGCTGCTCCTAGGAACTGCCCAGGGCTGCTTCATCAGGAACTGTCCTCGGGGCGGCAAGAGAGCGGTGGACGCCATGCAGCCTACCAGACAGTGCATGTCGTGCGGCCCGGAGGGCGTGGGCCAGTGCGTGGGACCCAACGTTTGCTGCGGACTGGGCCTGGGATGCCTGATGGGAACGCCGGAAACGGAAGTCTGTCAGAAAGAGAACGAGAGTTCCGTCCCCTGCGCGATCAGTGGTCGCCGCTGCGGCATGGACAACACGGGCAACTGTGTGGCTGATGGCATCTGCTGTGTGGAAGATGCCTGCTCGTTCAACTCGCTGTGCAGAGTGGAC…	2.01944	1	1
OK193_E_242	Hormone	Conorfamide		OK193A_TRINITY_DN2547_c1_g1_i1_Frame_R1	MSGSGFLLLALLLLGTVEATKVEQEKKGMQTDQLIKFYDPLPRLGRQNMQSPLFSERLRTRALGFRQLSSQKQ*	ATGTCAGGCTCTGGATTCCTGCTACTTGCCCTGTTGCTTCTGGGGACTGTGGAAGCCACTAAAGTGGAACAGGAGAAAAAAGGAATGCAAACTGACCAGTTGATAAAGTTCTACGACCCCCTCCCAAGACTTGGCCGCCAAAATATGCAATCTCCATTATTCTCCGAACGGCTCCGAACCCGAGCGCTGGGGTTCCGACAGCTGTCGTCACAGAAACAATGA	44.0109	1	1
OK193_E_243	Hormone	Insulin-related peptide	Insulin-related peptide-5	OK193A_TRINITY_DN732_c0_g2_i1_Frame_R2	MTTSSYFLLVALGLLLYVCQSSFGGEHVCGSNQPNHPNGKCGSTMADYLEEQCEEEEAAQGGTNDARATTGRALSLSKRRGFLSMLKRRGKRNEASPLQRAGRGIVCECCKNHCTDEEFTEYCPRVTESG*	ATGACGACATCGTCCTACTTTCTGCTGGTGGCCTTAGGCCTTCTGCTGTACGTGTGTCAATCTTCCTTTGGCGGCGAACATGTCTGTGGGTCTAATCAACCTAATCACCCGAACGGCAAATGTGGATCAACAATGGCTGATTATCTCGAAGAACAGTGTGAAGAAGAGGAAGCTGCGCAAGGCGGAACAAACGACGCACGGGCGACAACAGGGCGGGCTTTGTCACTGAGTAAGCGACGGGGCTTTCTCTCCATGCTGAAGAGACGGGGCAAGAGGAATGAAGCATCTCCTCTGCAGAGAGCTGGCCGGGGAATTGTCTGTGAATGTTGTAAAAATCACTGCACTGATGAAGAATTTACCGAGTATTGTCCCCGTGTCACTGAGTCCGGTTAA	9.84616	1	1
OK193_E_244	Hormone	Insulin-related peptide	Insulin-related peptide-5	OK193A_TRINITY_DN732_c0_g1_i1_Frame_R3	MMTSSYFLLVALGLLLYVCQSSFGQEHTCEPNAPAHPQGKCGSALANYVEEMCEEEEAEHAGTNNARKKRGRASPLRKRFLSMLKTRAKRNEAFLLKRSTQGIVCECCNNHCTDEEFTEYCPPVTES*	ATGATGACATCGTCCTACTTTCTGCTGGTGGCCTTAGGCCTTCTGCTGTACGTGTGTCAATCTTCCTTTGGCCAGGAACATACCTGCGAGCCTAACGCTCCTGCTCATCCACAGGGCAAATGTGGGTCAGCACTGGCCAACTATGTCGAAGAAATGTGTGAAGAAGAGGAAGCTGAGCATGCTGGAACAAACAACGCAAGGAAGAAGAGAGGACGGGCTTCTCCGCTGAGGAAGCGCTTTCTCTCCATGCTGAAGACACGGGCCAAGAGGAATGAAGCATTTCTTCTGAAGAGATCTACCCAGGGAATAGTCTGTGAATGTTGTAACAATCACTGCACTGATGAAGAATTTACCGAGTATTGTCCCCCAGTCACTGAATCATAA	22.582	1	1
OK193_E_245	Hormone	Prohormone-4a		OK193A_TRINITY_DN342_c0_g1_i7_Frame_F1	MNPYNPMNPVNSWYNPMNFQYPFHPPMRVASYYLTPPLGSSYLFPSNGYGHFHLAPTQAAAPLNLHMHFPYSYQAGGMYNPYMYPYQSSALYQPYGYAAGVPGAMAWNQFRGAAWNPYSAMGYGAYPMWPAQFAHMWPLHPYYQTVMPAQEGMCSYDRPFKCWGSATCIAIEAICDKNFDCNNHADEDPRICVAGRRPSYDILVSYLMLPNQHWMLQKLFNNVDPYTAAHALKLATSLGDLRWSLALTDENINNTKTVLEAVKNDNKDPLVSLGMQASAWESVKFLMKNLLSTDFFSD*	ATGAACCCCTATAATCCCATGAATCCTGTCAACAGCTGGTACAATCCCATGAACTTCCAATACCCCTTCCACCCTCCCATGCGAGTGGCTTCCTATTACCTCACTCCGCCTCTGGGCAGCTCCTACCTCTTTCCCTCTAACGGCTACGGCCACTTCCACCTTGCTCCTACGCAGGCGGCGGCACCGCTCAATCTTCACATGCACTTCCCGTACTCCTACCAGGCTGGTGGTATGTACAATCCTTACATGTACCCGTATCAGTCGTCGGCCCTGTATCAGCCCTACGGCTACGCTGCGGGTGTTCCTGGGGCCATGGCATGGAATCAGTTCAGGGGAGCTGCCTGGAATCCCTATTCCGCCATGGGTTACGGAGCTTATCCTATGTGGCCGGCTCAGTTC…	965.578	1	1
OK193_E_246	Other venom-related protein	Conoporin		OK193A_TRINITY_DN43_c0_g2_i16_Frame_R2	MRVPFPALKTMVTVFLLLMGNMSPVVPRSSIPLDKVKVLAYEVVTSGNSLNGVTLQDLAETEYDVTCVVQVENWTRYPLMTPRQRIANDGAWTTYPVAILPGKREAFAVRKASGVKKGVYGIVSWELLGARRRFVIMWSAPYDLNKYSNWMGLGMTREGLTDVAPGDTWFDQMYSDKSSGSLTFERKEFYHNTDPVIYRNAKFEAEGAMTNGNHAQVKIVVRPTRNNWKDLADEIRQKLV*	ATGAGGGTTCCATTCCCGGCACTGAAGACGATGGTGACTGTTTTCCTTCTGTTGATGGGGAACATGTCACCAGTTGTTCCGAGGTCTTCCATCCCTCTCGACAAGGTGAAGGTGCTTGCTTACGAAGTTGTCACTTCAGGGAATTCGCTGAATGGTGTCACTCTACAGGACTTGGCAGAGACCGAGTACGACGTTACGTGCGTCGTTCAAGTGGAGAACTGGACTCGCTACCCCTTGATGACCCCCAGACAACGGATCGCCAATGATGGGGCCTGGACCACATATCCTGTTGCCATACTACCGGGAAAGAGAGAGGCCTTTGCCGTGCGGAAGGCTTCAGGTGTGAAAAAAGGTGTGTATGGCATTGTGTCCTGGGAATTGCTTGGGGCCAGGCGACGC…	NA	1	1
OK193_E_247	Other venom-related protein	Conodipine	Conodipine-2	OK193A_TRINITY_DN434_c0_g1_i1_Frame_F1	MKMLESALWILAALALPWIVAQDSSTAELCKINSNGCSVPFAFIPCQKHFLAACDIHDNCYLCGAHFGLTRNNCDNAFLTHMTALCAQGTDEGGFCLERRKRREASSMFITTTPLRQLRLLEKLMPPNSLSDHDSRQPQQRFFTCTEWAEKYFDAVRTSGSSYFSDTANATYCPQFVDCMP*	ATGAAGATGCTGGAATCGGCCCTGTGGATACTGGCAGCTCTGGCACTGCCATGGATTGTGGCTCAGGATTCCAGTACGGCTGAGTTATGCAAGATCAACAGCAACGGTTGCAGTGTTCCTTTTGCGTTCATACCATGCCAAAAGCATTTCCTTGCCGCCTGTGACATACACGATAACTGTTACCTTTGTGGAGCGCATTTCGGCCTCACGCGGAACAACTGCGACAACGCTTTTCTCACACACATGACTGCTCTGTGTGCCCAAGGCACTGATGAGGGAGGCTTCTGCCTGGAGAGACGGAAACGAAGAGAAGCTTCCAGCATGTTCATCACCACCACCCCTCTCAGACAACTACGGCTCCTGGAGAAACTCATGCCCCCGAATTCCTTGTCGGACCAT…	NA	1	1
OK193_E_248	Other venom-related protein	Conodipine	Conodipine-2	OK193A_TRINITY_DN434_c0_g1_i8_Frame_F1	MKMLESALWILAALALPWIVAQDSSTAELCKINSNGCSVPFAFIPCQKHFLAACDIHDNCYLCGAHFGLTRNNCDNAFLTHMTALCAQGTDEGGFCLERRKRREASSMFITTTPLRQLRLLEKLMPPNSLSDHDSRQPQQRFFTCTDWAKNYFDAVRISGSSYFSDTANATYCPQFVDCMP*	ATGAAGATGCTGGAATCGGCCCTGTGGATACTGGCAGCTCTGGCACTGCCATGGATTGTGGCTCAGGATTCCAGTACGGCTGAGTTATGCAAGATCAACAGCAACGGTTGCAGTGTTCCTTTTGCGTTCATACCATGCCAAAAGCATTTCCTTGCCGCCTGTGACATACACGATAACTGTTACCTTTGTGGAGCGCATTTCGGCCTCACGCGGAACAACTGCGACAACGCTTTTCTCACACACATGACTGCTCTGTGTGCCCAAGGCACTGATGAGGGAGGCTTCTGCCTGGAGAGACGGAAACGAAGAGAAGCTTCCAGCATGTTCATCACCACCACCCCTCTCAGACAACTACGGCTCCTGGAGAAACTCATGCCCCCGAATTCCTTGTCGGACCAT…	NA	1	1
OK193_E_249	Other venom-related protein	Conohyaluronidase		OK193A_TRINITY_DN10754_c0_g1_i1_Frame_R3	DYQGSSGDDCDEGLPPPDQPFRVVWNHPDTCERIKLHLPLAEYGIIFNKLRLFLGEEIQTLYDTGPWPYISETGKFINGGLPQSFNHPDNDGETRRILKKHKPENFTGLGVLDFETWRAIYSTNFGPMTIYQNESVKLMKEQHPDYDQKKLTTEAEKEWQQAAKEIMSNKLKIAQKLMPKGHWGYYLYPRTWDNKRDTEFRNNKIDWLWRQSTGLYPSIYIYDFNKTESVITKFVSDTVGEAVRVQKDFSPPNTPIYPYVMFQTMQDTFHYEDHLKISLGLSAKMGAAGVDLWGTSLHYKESKRQLQCQRLQEHIRTVLGPLVKNVTQMMTDCSRAICEGHGRCVHNSHDVILGETESQRLSDLCSTRQSRFRDYHCRCYSAWGGACCQTLRPSRCQKR…	GATTATCAAGGATCCAGTGGTGATGACTGTGACGAAGGCCTTCCTCCACCTGACCAGCCCTTCAGGGTGGTATGGAACCACCCGGACACCTGCGAGAGAATCAAGCTTCATCTCCCTCTGGCTGAGTACGGCATCATCTTCAACAAGCTTCGACTCTTCCTGGGCGAGGAGATACAGACCCTCTATGATACTGGACCTTGGCCCTACATCTCCGAAACGGGAAAGTTCATTAATGGGGGATTACCTCAGTCGTTCAACCACCCTGACAACGACGGCGAAACACGGAGGATACTGAAGAAGCACAAACCAGAGAACTTCACTGGATTGGGCGTTCTGGATTTTGAAACGTGGCGAGCAATCTACAGCACTAACTTCGGCCCTATGACAATATACCAGAAT…	NA	1	0
OK193_E_250	Other venom-related protein	Ferritin		OK193A_TRINITY_DN370_c0_g1_i1_Frame_F2	MAVSQCRQNYHAECEAGINRQINMELHASYCYQSMAFYFDRDDVALPGFAKFFRKSSEEEREHAEKLMTFQNQRGGRIVLQDIKKPDRDEWGSGLDAMQVALALEKSVNQSLLDLHEVATNHNDAQMTDFLEGNYLQEQVRSIKELGDYITNLKRVGPGLGEYMFDKETLQE*	ATGGCTGTCAGTCAGTGCCGTCAGAACTACCACGCCGAGTGTGAAGCTGGCATCAACCGACAGATCAACATGGAACTTCATGCCAGTTATTGCTACCAGTCCATGGCATTCTACTTTGACCGTGATGATGTAGCTCTGCCGGGGTTTGCCAAGTTCTTCAGAAAGTCATCTGAAGAGGAACGCGAGCATGCTGAGAAGCTGATGACATTCCAGAACCAGCGTGGCGGCCGTATTGTCCTGCAGGATATCAAGAAACCTGATCGGGATGAGTGGGGCTCGGGTCTGGATGCTATGCAAGTGGCGCTGGCACTGGAGAAGAGCGTCAACCAGTCGCTGCTGGACCTGCATGAGGTGGCCACCAATCACAACGATGCCCAGATGACAGACTTCCTGGAAGGC…	NA	1	1
OK193_E_251	Other venom-related protein	Ferritin		OK193A_TRINITY_DN10992_c0_g1_i2_Frame_R2	MAHNVSQCRQNYHAESEAGVNRQINMELYASYCYQSMSFYFDRDDVALPGFAKFFKEASEEEREHAEKLMKFQNKRGGRVVLQDIKKPDRDEWGTGLDAMQVALGLEKSVNQALLDLHEVAASHKDAQMTDFLEGEYLQEQVESIKKIGDHITNLKRVGTGLGEYMFDKNLS*	ATGGCCCACAACGTCAGCCAGTGCCGCCAGAACTACCACGCCGAGAGCGAGGCTGGGGTCAACAGGCAGATCAACATGGAGCTGTATGCCTCCTACTGCTATCAGTCCATGTCGTTCTACTTCGACCGTGACGACGTGGCGCTGCCAGGGTTTGCCAAGTTCTTCAAGGAGGCCTCAGAGGAGGAGCGCGAGCACGCCGAGAAGCTGATGAAGTTCCAGAACAAGCGAGGAGGCCGTGTGGTGCTTCAGGACATCAAGAAGCCTGACCGTGACGAGTGGGGCACAGGACTGGACGCCATGCAGGTGGCGCTGGGGCTGGAGAAGAGCGTCAACCAGGCCCTGCTGGACCTGCATGAGGTCGCCGCCAGCCACAAGGACGCCCAGATGACGGACTTCCTG…	NA	1	1
OK193_E_252	Other venom-related protein	Ferritin		OK193A_TRINITY_DN9725_c0_g1_i1_Frame_F3	MSQVRQNFHEECEAAINRQINLQKYADYVYMSMSFYFDRDDVSLKGFHEFFKKKAHEECGYAEKLMEYQNMRGGRILLQTVKKPDRDDWGSGLEALQAALQLEKSINQSMLELHQCASCHNDPQMSDFVEDSFLKEQVETIKEISDYITNLKRVGTGLGEFIFDKETLQEKQE*	ATGTCTCAAGTTCGTCAGAATTTTCACGAAGAATGTGAGGCAGCCATTAACAGGCAGATAAATCTGCAAAAGTATGCAGATTATGTTTATATGTCAATGTCCTTCTACTTTGACCGGGATGACGTGAGCCTGAAAGGATTTCACGAGTTCTTCAAGAAGAAGGCTCATGAGGAGTGTGGGTATGCAGAGAAACTGATGGAATACCAGAACATGCGCGGTGGCCGCATTCTCCTGCAGACCGTGAAGAAGCCGGACCGTGACGACTGGGGCAGCGGACTGGAGGCCCTGCAGGCGGCCCTGCAGCTGGAGAAGTCCATCAACCAGTCCATGCTGGAACTGCACCAGTGTGCCAGCTGTCATAATGACCCTCAGATGAGCGACTTTGTGGAGGACAGCTTC…	NA	1	1
OK193_E_253	Other venom-related protein	Insulin-like growth factor binding protein	Insulin-like growth factor binding protein	OK193A_TRINITY_DN12074_c0_g2_i3_Frame_R3	MRGQVLLFITAMLLTGIMAAKKCPTCDPEACPKLNGANCLAGTTKDECGCCDVCAKLEGEACDISAENDPCGDGLQCRDAEGTGPICQCRFQEIMCGSDNKTYTNLCQLLTTAVRERRTNTLNVKRVGPCEPGARIVTKPEYVRNHTKSNVVLQCEAMGLPTPSMTWVFTRADNQTYNVPGDDFKMVTSSRGGPGKYMVTSWLQIEGLQKVHEGDYTCVAINQHHTDRAKARIKVVERQ*	ATGAGGGGGCAGGTCCTACTTTTTATCACGGCGATGCTGCTCACTGGCATCATGGCCGCCAAGAAATGCCCCACCTGCGATCCCGAAGCTTGCCCGAAACTGAACGGTGCTAACTGTCTGGCAGGAACAACCAAAGACGAGTGTGGCTGCTGTGATGTGTGCGCCAAACTAGAGGGGGAGGCCTGCGACATCAGTGCAGAGAACGATCCCTGCGGAGATGGGCTGCAGTGCAGGGACGCGGAGGGCACGGGGCCTATCTGCCAGTGCCGGTTCCAGGAGATCATGTGCGGCAGCGACAACAAAACATACACCAACCTGTGCCAGCTGCTGACCACTGCTGTCCGCGAGCGGCGCACCAACACGCTCAACGTGAAACGTGTGGGACCTTGCGAACCCGGT…	NA	1	1
OK193_E_254	Other venom-related protein	Lysozyme		OK193A_TRINITY_DN6258_c0_g1_i2_Frame_F3	RRASSGSDTPCINKGGTCQYVQRQCTGQYHSNLCSGAANRRCCIPSSTSSGSSHSSGGYNCFGNFMNLHPTGASTQTARQDRIGHGGVSASQRMVSNDINELNNRKSCYIQAGNNNCVHPAVIAGIASRESRGGAAIKRTGGWGDNHNAYGIMQCDGGASGLGRRCTRYAWDSCEHINMMVEILLVPYIRTMQSKHPSWAREQQLQGAVSAYNAGTGNVRTFDRMDEGTTGNDYSNDVMARAQYLVNNFRW*	CGCCGTGCCTCGTCAGGATCGGACACACCCTGTATCAACAAAGGCGGTACCTGTCAGTATGTTCAGCGCCAGTGTACTGGACAATATCACAGCAACCTGTGTTCTGGGGCTGCCAACAGACGGTGCTGTATTCCTTCCTCCACCTCTTCAGGCTCATCGCACAGCTCTGGCGGTTACAACTGTTTCGGGAACTTCATGAACCTGCATCCTACAGGAGCCAGCACCCAGACCGCCAGACAGGATCGCATCGGCCATGGAGGAGTGTCGGCTTCTCAAAGAATGGTATCCAACGACATTAACGAACTCAACAATCGGAAGTCCTGCTACATACAGGCCGGAAACAACAATTGCGTGCACCCTGCAGTGATAGCGGGTATCGCAAGCCGAGAGTCGCGGGGT…	NA	1	0
OK193_E_255	Other venom-related protein	Neuropeptide F		OK193A_TRINITY_DN280_c0_g2_i1_Frame_R3	MHKALLSALLVISLVVAEVTCGEAMMGPPERPQVFQRPEDLVNYLKALNEYYAIVGRPRFGRSVNTNKRSVEELGDLKSDE*	ATGCACAAAGCTCTGCTGTCTGCCTTGTTAGTCATCTCCCTTGTGGTGGCGGAAGTGACGTGTGGGGAAGCGATGATGGGGCCCCCTGAGAGGCCCCAAGTGTTCCAGAGACCCGAGGACCTCGTGAACTACCTCAAGGCCCTCAATGAGTACTACGCCATCGTGGGCCGACCCAGGTTCGGACGCAGTGTCAACACCAACAAGAGATCAGTGGAAGAACTTGGTGACCTCAAATCTGATGAGTAG	NA	1	1
OK193_E_256	Other venom-related protein	PPI		OK193A_TRINITY_DN7731_c0_g1_i1_Frame_F1	MASACALSRLCARAVSSGANTFYGTRFSSKCMFVRFCSQKSGRPRVYFDMTADGETLGRIEFELFSDVVPKTAENFRALCTGEKGFGYKKSAFHRVIPSFMCQGGDFTRGNGTGGKSIYGNKFDDENFDLKHNKPGLLSMANAGPNTNGSQFFITTVVTSWLDGGHVVFGEVAKGMEVVKQIEKLGSESGRTKKKIEIDDCGEL*	ATGGCGTCAGCATGTGCCCTTTCCCGCCTATGTGCGCGCGCAGTGTCATCAGGCGCGAACACTTTCTATGGAACTCGGTTTTCGTCAAAATGCATGTTCGTCCGATTCTGCTCGCAGAAGTCAGGAAGACCTCGTGTTTATTTTGACATGACAGCTGATGGTGAAACACTGGGAAGAATAGAATTTGAGTTATTTTCTGATGTTGTCCCCAAAACAGCAGAGAATTTCCGTGCTCTCTGTACGGGTGAAAAAGGTTTTGGATACAAGAAGTCTGCCTTCCATCGTGTCATTCCTAGCTTCATGTGCCAGGGAGGTGACTTCACACGGGGTAATGGAACTGGGGGCAAGAGCATTTATGGCAACAAGTTTGATGATGAGAACTTCGATTTAAAACATAAC…	NA	1	1
OK193_E_257	Other venom-related protein	PPI		OK193A_TRINITY_DN5945_c1_g1_i1_Frame_F3	MVAPAMFVALASLVATSAVWPVAEAAKQQKPLDYKPIMVNQTVTAEATLEFTIKNFDESGDLHGTLKVGLFGEAVPMTVFNFLSICKGTKRPTGELKFSGSYCHRLIPDMHFQCGDITKGNGDGGTSIFGDKFNDENFEIGHSEKGTISMSNRGRDTNGSQFFITAREMRNLDGRHVAFGQIMDKASLDFLAKMNEVPTDKDYKPLRTIKLVDCTANNLKKPYILKRKGNAKQDTFDY*	ATGGTGGCGCCGGCCATGTTCGTCGCACTTGCCTCCCTTGTGGCCACGTCAGCCGTGTGGCCAGTGGCCGAAGCGGCCAAGCAGCAGAAGCCCCTCGACTACAAGCCGATCATGGTGAACCAGACCGTGACGGCGGAGGCTACCCTGGAGTTCACCATCAAGAACTTTGACGAAAGTGGCGACCTTCACGGGACCCTCAAGGTGGGGCTGTTCGGGGAGGCAGTGCCGATGACAGTCTTCAACTTCCTCTCCATCTGCAAAGGGACCAAGAGACCTACTGGGGAGCTGAAGTTTTCTGGGTCATACTGTCACCGTCTGATCCCAGACATGCACTTCCAGTGTGGAGATATCACCAAAGGCAACGGGGACGGAGGCACCAGCATCTTCGGGGACAAGTTC…	NA	1	1
OK193_E_258	Other venom-related protein	PPI	PPI-A	OK193A_TRINITY_DN68_c0_g2_i3_Frame_R2	MANPRCFFDIQIDGKPVGRIVMELRADVVPKTAENFRALCTGEKGFGYKGSSFHRVIPNFMCQGGDFTNHNGTGGKSIYGNKFEDENFQLKHTGPGVLSMANAGPGTNGSQFFLCTVKTEWLDGKHVVFGSVVEGMEVVKKIEGVGSQSGKTSKKVVIDNCGQL*	ATGGCCAATCCTCGGTGTTTCTTCGATATTCAAATAGACGGCAAACCTGTCGGAAGAATTGTCATGGAGTTGCGGGCCGATGTGGTTCCGAAAACAGCGGAGAACTTCAGAGCCCTGTGCACTGGGGAGAAAGGATTTGGCTACAAAGGATCATCCTTTCATCGAGTCATTCCTAATTTCATGTGCCAGGGAGGTGATTTTACAAACCACAATGGCACTGGTGGCAAGAGCATCTACGGAAACAAATTTGAAGATGAGAACTTCCAGCTGAAACACACTGGACCAGGAGTCCTTTCCATGGCGAATGCCGGTCCCGGTACCAATGGCTCCCAGTTCTTCCTCTGCACTGTCAAGACTGAATGGCTGGATGGCAAGCACGTGGTGTTTGGCAGTGTGGTG…	NA	1	1
OK193_E_259	Other venom-related protein	PPI	PPI-A	OK193A_TRINITY_DN68_c0_g2_i1_Frame_R3	MANPKCYFDIEIDGKPAGRITMELRADVVPKTAENFRALCTGEKGFGYKGSSFHRVIPNFMCQGGDFTNHNGTGGKSIYGNKFEDENFQLKHTGPGVLSMANAGPGTNGSQFFLCTVKTEWLDGKHVVFGSVVEGMEVVKKIEGVGSQSGKTSKKVVIDNCGQL*	ATGGCGAATCCAAAGTGCTATTTCGACATTGAAATAGATGGCAAACCTGCAGGGAGAATAACCATGGAGCTGCGGGCTGATGTGGTTCCCAAAACAGCAGAGAATTTCAGAGCCCTGTGCACAGGGGAGAAAGGCTTTGGGTACAAAGGATCATCCTTTCATCGAGTCATTCCTAATTTCATGTGCCAGGGAGGTGATTTTACAAACCACAATGGCACTGGTGGCAAGAGCATCTACGGAAACAAATTTGAAGATGAGAACTTCCAGCTGAAACACACTGGACCAGGAGTCCTTTCCATGGCGAATGCCGGTCCCGGTACCAATGGCTCCCAGTTCTTCCTCTGCACTGTCAAGACTGAATGGCTGGATGGCAAGCACGTGGTGTTTGGCAGTGTGGTG…	NA	1	1
OK193_E_260	Other venom-related protein	PPI	PPI-A	OK193A_TRINITY_DN68_c0_g1_i2_Frame_R3	MANPKCYFDIEIDGKPAGRITMELRADVVPKTAENFRALCTGEKGFGYKGSSFHRVIPDFMCQGGDFTKHNGTGGKSIYGEKFADENFQLKHTGPGILSMANAGPNTNGSQFFLCTVKTEWLDRKHVVFGSVVEGMDVVKQVEGVGSQSGKTTKKVVIADCGQL*	ATGGCGAATCCAAAGTGCTATTTCGACATTGAAATAGATGGCAAACCTGCAGGGAGAATAACCATGGAGCTGCGGGCTGATGTGGTTCCCAAAACAGCAGAGAATTTCAGAGCCCTGTGCACAGGGGAGAAAGGCTTTGGGTACAAAGGATCATCCTTTCATCGAGTCATTCCTGACTTCATGTGTCAGGGAGGTGATTTTACAAAACACAATGGCACTGGTGGCAAGAGCATCTATGGTGAGAAGTTCGCTGATGAGAACTTCCAGCTGAAGCACACTGGACCAGGAATCCTTTCCATGGCCAATGCTGGTCCCAACACCAATGGCTCCCAGTTCTTCCTCTGCACTGTCAAGACCGAATGGCTGGATCGCAAGCACGTGGTGTTTGGCAGTGTGGTG…	NA	1	1
OK193_E_261	Other venom-related protein	PPI	PPI-A	OK193A_TRINITY_DN68_c0_g1_i1_Frame_R2	MANPRCFFDIQIDGKPVGRIVMELRADVVPKTAENFRALCTGEKGFGYKGSSFHRVIPDFMCQGGDFTKHNGTGGKSIYGEKFADENFQLKHTGPGILSMANAGPNTNGSQFFLCTVKTEWLDRKHVVFGSVVEGMDVVKQVEGVGSQSGKTTKKVVIADCGQL*	ATGGCCAATCCTCGGTGTTTCTTCGATATTCAAATAGACGGCAAACCTGTCGGAAGAATTGTCATGGAGTTGCGGGCCGATGTGGTTCCGAAAACAGCGGAGAACTTCAGAGCCCTGTGCACTGGGGAGAAAGGATTTGGCTACAAAGGATCATCCTTTCATCGAGTCATTCCTGACTTCATGTGTCAGGGAGGTGATTTTACAAAACACAATGGCACTGGTGGCAAGAGCATCTATGGTGAGAAGTTCGCTGATGAGAACTTCCAGCTGAAGCACACTGGACCAGGAATCCTTTCCATGGCCAATGCTGGTCCCAACACCAATGGCTCCCAGTTCTTCCTCTGCACTGTCAAGACCGAATGGCTGGATCGCAAGCACGTGGTGTTTGGCAGTGTGGTG…	NA	1	1
OK193_E_262	Other venom-related protein	PPI	PPI-A	OK193A_TRINITY_DN68_c0_g2_i2_Frame_R2	MSNPKCFFDMTIGGSPAGRIVMELRADVVPKTAENFRALCTGEKGFGYKGSSFHRVIPNFMCQGGDFTNHNGTGGKSIYGNKFEDENFQLKHTGPGVLSMANAGPGTNGSQFFLCTVKTEWLDGKHVVFGSVVEGMEVVKKIEGVGSQSGKTSKKVVIDNCGQL*	ATGAGCAACCCTAAATGCTTCTTCGATATGACGATTGGCGGCAGCCCGGCAGGAAGGATTGTTATGGAGTTACGAGCTGATGTGGTTCCTAAAACAGCAGAGAACTTCAGAGCCCTGTGCACTGGGGAGAAAGGATTTGGCTACAAAGGATCATCCTTTCATCGAGTCATTCCTAATTTCATGTGCCAGGGAGGTGATTTTACAAACCACAATGGCACTGGTGGCAAGAGCATCTACGGAAACAAATTTGAAGATGAGAACTTCCAGCTGAAACACACTGGACCAGGAGTCCTTTCCATGGCGAATGCCGGTCCCGGTACCAATGGCTCCCAGTTCTTCCTCTGCACTGTCAAGACTGAATGGCTGGATGGCAAGCACGTGGTGTTTGGCAGTGTGGTG…	NA	1	1
OK193_E_263	Other venom-related protein	PPI	PPI-B	OK193A_TRINITY_DN403_c0_g1_i6_Frame_R1	MLASGIVLILLVHAFALADDKPKGPKVTEKVYFDIEIGGKAAGRIVIGLFGKTVPKTVENFKQLAIGEKEQDGKKLTYKGSKFHRVIKDFMIQGGDFTRGDGTGGRSIYGEKFPDENFKLKHYGSGWLSMANSGKDTNGSQFFITTKKTSWLDGRHVVFGTVLEGMDVVRKIEASKTDARDKPEKDVVIADCGALEVTKQFSVEKRDAPE*	ATGTTAGCAAGTGGAATTGTGCTCATTTTGCTTGTGCATGCTTTTGCACTTGCTGATGACAAACCTAAAGGGCCCAAAGTGACCGAAAAGGTTTATTTTGACATTGAAATAGGGGGCAAGGCAGCTGGGCGCATCGTCATCGGACTGTTTGGCAAAACTGTACCAAAAACTGTTGAGAATTTCAAGCAGTTAGCCATAGGAGAAAAGGAACAAGATGGCAAGAAACTTACCTACAAAGGCAGCAAATTCCACAGAGTGATCAAAGATTTCATGATTCAAGGAGGAGATTTCACCAGGGGTGATGGGACCGGTGGCCGCAGTATCTATGGGGAAAAGTTCCCTGATGAGAACTTCAAGCTGAAGCACTACGGATCTGGCTGGCTGTCCATGGCCAACTCC…	NA	1	1
OK193_E_264	Other venom-related protein	PPI	PPI-B	OK193A_TRINITY_DN2467_c0_g1_i1_Frame_F3	MLVCGAIVFLLVQGFAFADKPKGPKVTDKVFFDIEIGGEKAGRIVIGLFGKTVPKTAKNFKKLAEGFEESGETLTYKGSKFHRVIKEFMIQGGDFTRGDGTGGKSIYGEKFADENFKLQHYGPGWLSMANAGKDTNGSQFFITTKKTPWLDGRHVVFGKVLEGMKVVRKIEGTRTGDRDKPVKDVVIVDSGSLPVDEPFSVSKDPVSEEN*	ATGTTGGTCTGTGGAGCTATTGTTTTCTTGCTTGTGCAAGGTTTTGCATTTGCAGACAAGCCCAAGGGGCCGAAGGTAACGGACAAGGTGTTCTTTGACATTGAAATTGGTGGGGAGAAAGCAGGCCGTATTGTCATTGGCCTGTTTGGAAAAACTGTGCCGAAGACTGCAAAGAACTTCAAGAAGTTAGCTGAGGGATTTGAGGAAAGTGGAGAAACATTGACCTACAAAGGGAGCAAGTTCCACCGCGTGATCAAAGAGTTCATGATTCAGGGTGGAGATTTTACTCGGGGTGATGGAACTGGAGGGAAGAGCATTTACGGAGAGAAGTTTGCTGATGAGAACTTCAAGCTGCAGCACTATGGGCCAGGCTGGCTCTCCATGGCTAATGCTGGCAAG…	NA	1	1
OK193_E_265	Other venom-related protein	PPI	PPI-C	OK193A_TRINITY_DN22375_c0_g2_i1_Frame_F2	MAAITTQTRMQPPNITVETTMGVFVLEMYWKHAPTTCRNFVELCRRGYYNGVKFHRIIQDFMIQGGDPTGTGRGGSSIYGKNFNDEISEDLKHTGAGILSMANSGPDTNGSQFFITLAPTQWLDGKHTIFGRVSSGMTVIQRMGLVETDSNDRPLDDVKIVKSYPTLT*	ATGGCGGCAATCACAACGCAGACGAGAATGCAACCTCCAAATATTACTGTGGAAACAACAATGGGTGTGTTTGTCTTGGAAATGTACTGGAAACATGCGCCCACTACATGTCGGAACTTTGTGGAGTTGTGCCGAAGAGGTTACTACAATGGAGTCAAGTTCCACAGGATCATCCAGGATTTCATGATCCAAGGAGGCGACCCCACTGGCACAGGAAGAGGTGGCTCATCTATTTATGGCAAGAACTTCAACGATGAAATTTCTGAAGATTTGAAACACACAGGAGCAGGGATTCTGTCCATGGCCAACAGCGGGCCCGACACCAATGGCAGTCAGTTCTTCATCACACTGGCCCCCACACAATGGCTGGACGGGAAGCACACCATCTTTGGGCGAGTC…	NA	1	1
OK193_E_266	Other venom-related protein	PPI	PPI-E	OK193A_TRINITY_DN5655_c0_g1_i10_Frame_F1	MASSANNKRMVYVGGLAEEVDDKVLHAAFLPFGDIVDVQIPLDYETEKHRGFAFIEFELAEDAAAAIDNMNESELFGRTIRVNLAKPMKVKEGASRAVWADDNWLQKHAGETLEESQDKEEEEESNKRPAEDDSEADSGASAAKRSRPAGNPQVYMDIKIGSRGVGRLVMELRADVVPKTAENFRCLCTYEKGYGFRGSSFHRIIPQFMCQGGDFTNHNGTGGKSIYGKKFEDENFQLRHTAAGDLSMANSGPNTNGSQFFITTAKTDWLDGKHVVFGRVTEGMDVVYKMEKCGTKGGKPTEKVTIAGCGELV*	ATGGCATCCTCTGCAAATAACAAGCGCATGGTCTACGTTGGTGGCTTAGCAGAAGAGGTTGACGACAAAGTGTTGCATGCAGCTTTCCTGCCGTTTGGTGACATAGTGGATGTTCAGATCCCATTGGATTATGAAACAGAAAAGCACAGAGGATTTGCATTCATTGAATTCGAACTGGCAGAAGATGCTGCGGCTGCCATTGACAACATGAATGAGTCAGAGCTGTTTGGTCGTACGATCCGTGTCAATCTGGCAAAGCCAATGAAGGTCAAAGAAGGAGCTTCAAGAGCAGTATGGGCTGATGACAACTGGCTTCAGAAACATGCAGGGGAAACTCTGGAAGAAAGCCAAGATAAAGAGGAGGAAGAAGAGTCCAACAAGAGGCCAGCGGAGGATGAT…	NA	1	1
OK193_E_267	Other venom-related protein	PPI	PPI-H	OK193A_TRINITY_DN3623_c0_g1_i2_Frame_F3	MAQLQREDITNPVVFFDISIGNTEVGRIKFELFANGPKGVPKTAENFRQFCTGEYRKDGVPIGYKGCSFHRVIKDFMVQGGDFVNGDGTGLTSIYGGRPFADEKFTYKHYGPGILSMANSGKDTNGCQFFITCAKCDFLDDKHVVFGRVIDGLLVLRKIENVPTGPNNKPKIPIMISQCGEM*	ATGGCACAGCTGCAGAGAGAAGACATCACCAATCCTGTCGTTTTCTTTGACATTTCCATCGGAAACACAGAAGTTGGTAGGATCAAGTTTGAGCTGTTCGCCAATGGACCTAAAGGAGTGCCCAAAACAGCGGAAAATTTCAGACAGTTCTGCACTGGGGAATACAGGAAAGATGGAGTTCCCATTGGATACAAAGGCTGCTCCTTCCACAGAGTCATCAAAGACTTCATGGTACAAGGGGGAGACTTCGTCAATGGAGATGGAACAGGACTGACCAGCATCTATGGTGGACGGCCATTTGCAGATGAAAAGTTCACATACAAACATTATGGCCCAGGGATTCTCAGCATGGCCAACAGTGGCAAAGACACCAACGGCTGTCAGTTTTTCATCACCTGT…	NA	1	1
OK193_E_268	Other venom-related protein	PDI	PDI-A2	OK193A_TRINITY_DN40_c6_g1_i38_Frame_R1	WLKKKTGPPAKNVKTSEEAKTFIDSDEVIVMGFFKDQEGKGATAFKKIAVEIEDVAFGITSEDSVFKEHKMKKDGVVLFKKFDEGRNDFSGDFEEAAMSKFVKDNRLPLINEFTQETAQKLFTGDVQTHLMLFIKKEETKDTLDTFKAAAGEFKGKVLFIYLDTAKTENEHIMGFFGLKAADAPAMRLIQLGEDLAKYKPESDSLDKSTITKFVQDFLDGKLKPHLKSEEVPEDWDAQPVKVLVSKNFKEVAMDKSKAVFVEFYAPWCGHCKELAPIWDQLGEKFKDSKDIIIAKMDSTANELEEVKIKSFPTLKYFPKGSDEIIEYDGERTLEELTKFVESGGKQEPPKKEEEEKEEDDDKKKEEL*	TGGCTGAAGAAGAAGACCGGCCCCCCTGCCAAGAATGTGAAGACTTCAGAGGAGGCCAAGACTTTCATTGACAGCGATGAAGTCATTGTCATGGGCTTCTTCAAGGACCAGGAAGGCAAGGGCGCTACTGCCTTCAAGAAGATTGCCGTGGAAATCGAGGACGTTGCCTTTGGCATCACGTCAGAGGACAGCGTCTTTAAAGAGCATAAGATGAAGAAAGACGGCGTTGTTCTGTTTAAAAAGTTTGACGAGGGTCGCAATGACTTCTCTGGAGACTTTGAGGAGGCTGCCATGAGCAAGTTTGTCAAGGACAATCGCCTCCCTCTGATCAACGAGTTTACACAGGAGACTGCCCAGAAGCTCTTCACAGGGGACGTGCAGACCCACCTCATGCTTTTT…	NA	1	0
OK193_E_269	Other venom-related protein	PDI	PDI-A2	OK193A_TRINITY_DN40_c6_g1_i5_Frame_R3	MKFATVFSLTLLAFVACEEVEQEEKVYVLKTKNFDNFIEENEFVLVEFYAPWCGHCKQLAPAYSEAAGKLMDEGSNVKLAKVDATVERDLAEKFEVKGFPTIKFFISGKPMDYGGGRQTSEIINWLKKKTGPPAKNVKTSEEAKTFIDSDEVIVMGFFKDQEGKGATAFKKIAVEIEDVAFGITSEDSVFKEHKMKKDGVVLFKKFDEGRNDFSGDFEEAAMSKFVKDNRLPLINEFTQETAQKLFTGDVQTHLMLFIKKEETKDTLDTFKAAAGEFKGKVLFIYLDTAKTENEHIMGFFGLKAADAPAMRLIQLGEDLAKYKPESDSLDKSTITKFVQDFLDGKLKPHLKSEEVPEDWDAQPVKVLVSKNFKEVAMDKSKAVFVEFYAPWCGHCKELA…	ATGAAGTTTGCAACTGTTTTCTCTCTCACGTTGCTGGCCTTTGTGGCCTGTGAAGAAGTTGAACAAGAGGAAAAAGTCTATGTTTTAAAGACAAAAAATTTCGACAACTTCATTGAGGAAAATGAATTTGTTCTTGTGGAGTTTTACGCACCGTGGTGCGGCCACTGCAAACAGCTGGCTCCTGCGTACAGCGAGGCTGCCGGGAAATTGATGGATGAGGGTTCCAACGTCAAGCTGGCCAAGGTTGATGCCACCGTGGAGAGGGACTTGGCAGAAAAATTTGAAGTCAAAGGTTTCCCCACCATCAAATTCTTCATCAGTGGCAAACCAATGGATTACGGAGGAGGCAGGCAGACTTCCGAAATCATCAACTGGCTGAAGAAGAAGACCGGCCCCCCT…	NA	1	1
OK193_E_270	Other venom-related protein	PDI	PDI-A2	OK193A_TRINITY_DN40_c6_g1_i54_Frame_R2	MKFATVFSLTLLAFVACEEVEQEEKVYVLKTKNFDNFIEENEFVLVEFYAPWCGHCKQLAPAYSEAAGKLMDEGSNVKLAKVDATVERDLAEKFEVKGFPTIKFFISGKPMDYGGGRQTSEIINWLKKKTGPPAKNVKTSEEAKTFIDSDEVIVMGFFKDQEGKGATAFKKIAVEIEDVAFGITSEDSVFKEHKMKKDGVVLFKKFDEGRNDFSGDFEEAAMSKFVKDNRLPLINEFTQETAQKLFTGDVQTHLMLFIKKEETKDTLDTFKAAAGEFKGKVLFIYLDTAKTENEHIMGFFGLKAADAPAMRLIQLGEDLAKYKPESDSLDKSTITKFVQDFLDGKLKPHLKSEEVPEDWDAQPVKVLVSKNFKEVAMDKSKAVFVEFYAPWCGHCKELA…	ATGAAGTTTGCAACTGTTTTCTCTCTCACGTTGCTGGCCTTTGTGGCCTGTGAAGAAGTTGAACAAGAGGAAAAAGTCTATGTTTTAAAGACAAAAAATTTCGACAACTTCATTGAGGAAAATGAATTTGTTCTTGTGGAGTTTTACGCACCGTGGTGCGGCCACTGCAAACAGCTGGCTCCTGCGTACAGCGAGGCTGCCGGGAAATTGATGGATGAGGGTTCCAACGTCAAGCTGGCCAAGGTTGATGCCACCGTGGAGAGGGACTTGGCAGAAAAATTTGAAGTCAAAGGTTTCCCCACCATCAAATTCTTCATCAGTGGCAAACCAATGGATTACGGAGGAGGCAGGCAGACTTCCGAAATCATCAACTGGCTGAAGAAGAAGACCGGCCCCCCT…	NA	1	1
OK193_E_271	Other venom-related protein	PDI	PDI-A2	OK193A_TRINITY_DN517_c1_g1_i1_Frame_F1	MKFSSCLVLTLLVFVSAEEVKREEDVYVLTTKNFDSFIADNEFVLVEFYAPWCGHCKALAPEYAKAATALEEQNLNVKLGKVDATVEDSLAAKFEVRGYPTIKFFRKDKPKSPADYTGGRQSDDIINWLKKKTGPPAKELKEKDDVKSFVEKDEVVVIGFFKDQESTGALAFKKAAASIDDIPFAITSEDHVFKEYKMDKDGVVLLKKFDEGRNDFEGEFEEEAIVKHVRENQLPLVVEFTQESAQKIFGGEVKNHILLFLKKEGGEDTIEKFRGAAEDFKGKVLFIYLDTDNEENGRITEFFGLKDDEIPAVRLIQLAEDMSKYKPESSDLETATIKKFVQDFLDGKLKPHLMSEDVPDDWDAKPVKILVGKNFKEVAMDKSKAVFVEFYAPWCGHCK…	ATGAAGTTTTCATCTTGTTTAGTTTTAACTCTTCTGGTTTTTGTATCTGCCGAAGAAGTCAAACGGGAGGAAGATGTCTACGTTTTGACGACGAAAAATTTTGACTCCTTCATAGCTGATAATGAGTTCGTGCTTGTGGAATTTTATGCTCCCTGGTGTGGCCATTGCAAGGCATTGGCACCAGAATACGCCAAAGCTGCAACAGCTTTGGAGGAACAGAACTTAAACGTCAAGTTGGGCAAAGTGGATGCTACTGTGGAGGACAGTTTGGCCGCCAAATTCGAAGTTCGTGGATACCCAACAATCAAGTTCTTCCGTAAAGACAAGCCTAAGAGTCCAGCAGACTACACTGGTGGTCGCCAATCTGACGATATTATTAACTGGCTGAAGAAGAAGACA…	NA	1	1
OK193_E_272	Other venom-related protein	PDI	PDI-A3	OK193A_TRINITY_DN335_c0_g1_i1_Frame_F2	MLLAYFRPSAFTSPATMRRALILFSCIVLAVQASDVLEFTDSNFESKIKELDVALVEFYAPWCGHCKRLAPEYEKAATKLKTSDPPVPLVKVDCTAETKTCQEYGVSGYPTLKIFKGGELTKDYQGPRESNGIISTMLKEAGPASKELEDFKQYEDFIGRGTVCIVGFFEDADSEMAKTFSKLADTNEVDIRFGHTTASAVMDKAKYKDEIVLFRPKAMQNKFEDSAVKFTGDAKKKSAVKEFLTQEHLGMCGIRTINNAGDFSKPTFVAFYDVDYVKNPKGSNYWRNRVMKVGKKLRDEGLKVFFGVSNKEEHSHELGECGLQDAEGDKPIVCAYDEKNRKFKMEEEFSVDSFEKFVRGVLNGEVEPYLKSEPVPENNDQPVKVAVAKNFDELVNDPE…	ATGCTTCTCGCTTATTTCAGACCATCTGCCTTTACGTCTCCAGCAACGATGCGGCGAGCACTGATTTTATTTTCTTGCATTGTTCTTGCTGTTCAAGCAAGCGATGTTCTTGAATTCACAGATTCAAACTTTGAAAGCAAGATCAAAGAACTTGATGTGGCTCTCGTCGAGTTCTACGCACCGTGGTGCGGTCACTGCAAACGATTAGCACCAGAGTATGAAAAGGCTGCTACAAAACTGAAGACGAGTGACCCTCCAGTGCCTCTTGTAAAGGTGGACTGTACAGCAGAAACCAAGACATGCCAAGAATATGGTGTGAGTGGGTACCCAACCCTGAAGATTTTCAAGGGAGGTGAACTTACCAAAGATTACCAAGGACCCAGAGAATCAAATGGCATT…	NA	1	1
OK193_E_273	Other venom-related protein	PDI	PDI-A5	OK193A_TRINITY_DN1026_c0_g1_i1_Frame_F1	MALPWKALLFASFTLLYVIPFRFGAKQNKKDLIIRVDDFKDFKKLLRTRTNLLVIFTQSEKAASKSLALFEEVAEEMRGKATMAYINCGDDKKLCKKLKVYTTTFELKHYKDGEFNKNYDRKLTVKSMVNFLMDPTGDIPWDEDLTATDVVHIDTEDGLNKLLKKDKSAALVMFYAPWCGYCKRLKPDFAAAATEVKGKANLVGIDVDKPHMMGLRTLYNITGFPTLYYFEKGKVKYRYGGENSKEGIVSWLSNPKPPEEPKKEAEWAEEPSEVVHLEDDNFDDYIKEHPSVLVMFYAPWCGHCKKMKPGYTEAAQLIKDQEIPSVLAAVDATKHRKLAETYNIKGFPTLKYFKEGEFAFDVNERDKDKIIDFVKDPKEPPPPPAPEPSWEEVDSDVIH…	ATGGCGTTGCCGTGGAAAGCTCTACTGTTCGCAAGTTTCACTTTGCTGTATGTGATTCCTTTCCGGTTTGGGGCCAAGCAGAACAAGAAGGATCTGATCATCCGTGTTGATGATTTCAAGGACTTCAAGAAACTCCTACGGACTCGCACCAACCTCTTGGTGATCTTTACCCAGTCCGAAAAAGCCGCCTCAAAGTCTTTGGCCTTATTTGAAGAAGTGGCTGAAGAGATGAGAGGGAAAGCCACCATGGCATACATTAACTGTGGAGATGATAAAAAGTTGTGCAAAAAGCTGAAGGTTTATACAACAACATTTGAACTGAAGCACTACAAGGATGGAGAATTCAACAAAAACTATGACCGGAAACTGACGGTGAAGTCCATGGTGAACTTTCTGATG…	NA	1	1
OK193_E_274	Other venom-related protein	PDI	PDI-A6	OK193A_TRINITY_DN4093_c0_g1_i2_Frame_R3	MKMTGTGLVLFSLAVAGVSAMYSPSDDVVDLTPTNFHSKVINGDELWIVEFYAPWCGHCQSLAPEWKKAASALKGIVKVGAVNADEHNALGGQYGVRGFPTIKFFGQDKFNPQDYQGQRTAQGIVDFSINQAKSVASARLSGKKSGDSKSKSGGSGKAGDPADVVELTDSNFEKEVLEHDGLVMVEFYAPWCGHCKNLAPQWAKAASELKGKVKLCALDATVHTVMANRYGVRGYPTIKAFPAGKKDGEAEDYDGGRTASDIVQWAMEKAAANIPSPDVYEITSGEVLTDNCEGHQLCIISVLPQIYDCQSECRNNYISILKTLGEKFKKNQWGWLWAEAGAQPALEQSLEVGGFGYPALAAVNTRKMKFSLLRGQFSEKGINEFLRDLSYGKGSTSPL…	ATGAAAATGACAGGAACAGGACTGGTACTTTTTTCACTGGCGGTAGCAGGAGTGTCAGCAATGTACTCACCTAGTGATGATGTAGTGGACCTGACACCAACCAACTTTCACTCTAAAGTCATCAATGGCGATGAGCTGTGGATCGTGGAATTCTATGCTCCATGGTGTGGCCACTGTCAAAGCTTGGCTCCAGAGTGGAAAAAAGCAGCATCAGCTTTGAAGGGAATTGTGAAGGTGGGTGCTGTCAATGCAGATGAGCACAACGCCCTGGGTGGGCAGTATGGAGTGCGGGGCTTCCCCACCATCAAGTTCTTTGGCCAGGACAAGTTCAACCCTCAGGATTACCAGGGCCAACGCACAGCTCAAGGCATTGTGGACTTTAGCATTAACCAGGCCAAG…	NA	1	1
OK193_E_275	Other venom-related protein	PDI	PDI-A6	OK193A_TRINITY_DN3853_c0_g3_i1_Frame_F3	MRGLVVLLTLVTGSLALYEAGKDDVIQLSNSNFHFRVTNSFDIWIVEFYAPWCAHCQALVPEWKRVATVLKGIVRVAAINAEEHQSVSGSYNLKGVPAIKLFGTDKQKPVDYEGPRVAKDIIDFCMKYVKDTVDSRYQGKAKKSKKSKTVNPADLVEVTDSTFDKEVLQHKGMVMLEFYAPWCQHCQNLAPHWKQAATDLKGKVKVCAIDATKNTVTAQKYGVEGFPRIISFMSGVRGEDYNGGHTTSDIVEWALEKSGADLVSPEVLQITNEEVLKESCEEHQLCIISILPQIYDCQSKCRKNYLGILKRLGEKYKKYQWGWLWAEAGVQPALEDSVEVGGFGYPVSATCINAVCDEQMHMLRHMPLWSVHVVYR*	ATGAGAGGTCTGGTGGTTTTGCTGACTCTGGTGACAGGATCACTGGCTCTGTATGAGGCAGGCAAGGATGACGTTATACAATTGTCCAATTCCAATTTCCACTTCAGGGTCACCAACAGCTTTGACATATGGATTGTGGAGTTTTATGCCCCGTGGTGTGCCCACTGCCAGGCCTTGGTGCCAGAGTGGAAAAGAGTCGCCACAGTGCTGAAGGGGATCGTCAGAGTTGCAGCGATCAATGCGGAAGAACACCAGAGCGTCAGTGGCAGCTATAATCTGAAAGGTGTACCTGCCATCAAGTTGTTTGGAACAGACAAGCAGAAGCCTGTTGATTATGAAGGTCCGCGCGTTGCCAAGGATATTATCGACTTCTGCATGAAATACGTCAAGGACACTGTC…	NA	1	1
OK193_E_276	Other proteins	Sodium- and Chloride-dependent glycine/GABA transporter		OK193A_TRINITY_DN13247_c0_g1_i1_Frame_R3	MTAIADEFRFFKNRRSLVVALVCGYCFIIGLPSVTYGGTYFIYLMDTHAAPISLLFICFTEVVAVNWFYGVRRFAGDIENMLGFRPSYFWLICWIALCPLSLFLLFVLSLVGYEHLSLDGYLYPDWAVGVGWMVTGASVVCIPVYLLLSLLLSRGTWSQRWRQMTTPQPHQSRSSSWLTTTTTTTTMTTTCKMNAKNGLVVAECGGLTSPRGTSPL*	ATGACCGCCATAGCTGATGAGTTCCGGTTCTTCAAGAACCGCCGATCACTGGTGGTGGCGCTGGTCTGTGGCTACTGCTTCATCATCGGGTTACCGTCTGTCACATACGGTGGCACGTACTTCATCTATCTGATGGACACTCATGCAGCCCCCATCTCCCTCCTCTTCATCTGCTTCACCGAGGTCGTCGCTGTTAACTGGTTCTATGGAGTCAGACGTTTTGCCGGCGACATAGAAAACATGCTAGGCTTCCGTCCCAGTTATTTTTGGCTCATCTGTTGGATTGCCCTTTGTCCTCTGAGCCTTTTTCTGCTGTTCGTGCTGTCCTTGGTGGGGTACGAGCACCTGTCGTTGGACGGGTACCTGTACCCGGACTGGGCAGTGGGGGTGGGCTGGATG…	NA	1	1
OK193_E_277	Other proteins	Thioredoxin-like protein		OK193A_TRINITY_DN375_c0_g1_i10_Frame_R2	MAQIGQLAIQKPAPEFSTQAVVNGEFQTVKLSQYRGKYVVLFFYPLDFTFVCPTEIIAFSDRAEEFRSINCEVLAASTDSVFSHLAWVNTPRKQGGLGNMNIPLLADKTLDISRQYGCLKEDEGVSYRALYIIDDKGNLRQITMNDLPVGRSVDETLRLVQAFQFTDKHGDSDVRVVCPAGWKPGSDTIKPTVKDSKNYFTKAN*	ATGGCTCAGATCGGTCAGCTGGCGATTCAGAAACCTGCCCCCGAGTTCAGCACGCAGGCCGTGGTGAACGGAGAGTTCCAGACGGTGAAGCTCTCGCAGTACCGGGGCAAATACGTGGTCCTGTTCTTCTACCCCCTCGACTTCACCTTTGTGTGTCCCACGGAAATCATCGCATTCAGTGACCGTGCCGAAGAGTTCCGCTCCATCAACTGTGAGGTGCTGGCAGCTTCTACAGACAGTGTCTTCTCCCACTTAGCATGGGTAAACACCCCACGCAAACAGGGGGGTCTGGGCAACATGAACATTCCGCTGCTGGCTGACAAAACGCTGGACATCTCCCGCCAGTACGGCTGCCTCAAGGAGGATGAGGGCGTCTCCTACAGAGCTCTGTACATCATT…	NA	1	1

## Sheet: OK213A (ebraeus)
Sequence code	Category	Superfamily	Paralog group	TRINITY CDS name	Transcript	CDS	tpm	Presence of stop codon	Completeness
OK213_E_001	Conotoxin precursor	A	A-1	OK213A_TRINITY_DN33316_c0_g1_i1_Frame_R2	MFTMFLLVVLATAVVSFTLDRVSDGRNAVAKAFDPMALIARDTCCMHSGCWEQYPERCNKG*	ATGTTCACCATGTTTCTGTTGGTTGTCTTGGCAACCGCTGTCGTTTCCTTCACTTTAGATCGTGTATCTGATGGCAGGAATGCCGTAGCCAAAGCGTTTGACCCGATGGCTCTGATCGCCAGAGATACTTGCTGCATGCATTCTGGCTGTTGGGAACAATATCCAGAGCGTTGTAATAAAGGCTGA	2.8933	1	1
OK213_E_002	Conotoxin precursor	A	A-1	OK213A_TRINITY_DN26154_c0_g1_i1_Frame_F2	MLMMFTVFRLVVLATTVVSFTSDRAFRGRNAAAKASGLVGLTDKRQECCSYPACNLDHPELCG*	ATGCTGATGATGTTCACCGTGTTTCGGTTGGTTGTCTTGGCAACCACCGTCGTTTCCTTCACTTCAGATCGTGCATTTCGTGGCAGGAATGCCGCAGCCAAAGCGTCTGGCCTGGTCGGTCTGACCGACAAGAGGCAAGAATGCTGTTCTTATCCTGCCTGTAACCTAGATCATCCAGAACTTTGTGGTTGA	0.823129	1	1
OK213_E_003	Conotoxin precursor	A	A-1	OK213A_TRINITY_DN3321_c1_g3_i3_Frame_R3	MGMRMMFTVFLLVVLATAVVSFTSDRESSHENRRASNRILRGLWVECCANPACRNTHFEHCPVN*	ATGGGCATGCGGATGATGTTCACCGTGTTTCTGTTGGTTGTCTTGGCAACCGCTGTCGTTTCCTTCACTTCAGACCGTGAATCCAGTCATGAGAATCGCAGAGCATCTAACCGGATTCTGCGGGGGTTGTGGGTTGAATGCTGTGCTAATCCTGCTTGTCGGAATACTCATTTTGAGCATTGTCCCGTAAATTAA	85.7787	1	1
OK213_E_004	Conotoxin precursor	A	A-1	OK213A_TRINITY_DN3321_c1_g1_i1_Frame_R1	MGMRMMFTVFLLVVLATAVVSFSSDRASHGRNAAAKVFDRIALIATRECCANPQCWAKNCR*	ATGGGCATGCGGATGATGTTCACCGTGTTTCTGTTGGTTGTCTTGGCAACCGCTGTCGTTTCCTTCAGTTCAGATCGTGCATCTCATGGCAGGAATGCCGCAGCCAAAGTGTTTGACCGGATCGCTCTGATCGCCACACGCGAATGCTGTGCCAATCCTCAATGTTGGGCGAAGAATTGTCGTTGA	25.757	1	1
OK213_E_005	Conotoxin precursor	A	A-1	OK213A_TRINITY_DN3321_c1_g1_i2_Frame_R1	MGMRMTFTVFLLVVLATAAVSFSSDRASHGRNAAAKVFDRIALIATRECCANPQCWAKNCR*	ATGGGCATGCGGATGACGTTCACCGTGTTTCTGCTGGTTGTCTTGGCAACCGCTGCCGTTTCCTTCAGTTCAGATCGTGCATCTCATGGCAGGAATGCCGCAGCCAAAGTGTTTGACCGGATCGCTCTGATCGCCACACGCGAATGCTGTGCCAATCCTCAATGTTGGGCGAAGAATTGTCGTTGA	68.8284	1	1
OK213_E_006	Conotoxin precursor	A	A-2	OK213A_TRINITY_DN41808_c0_g1_i1_Frame_F2	MGMQMMFTVFLLVVLATTVVSIPSDRASDGRNAVVHERAPELVVTATTTCCGYDPMTICPPCMCTHSCPPKRKPGRRND*	ATGGGCATGCAGATGATGTTCACCGTGTTTCTGTTGGTTGTCTTGGCAACCACTGTCGTTTCCATCCCTTCAGATCGTGCATCTGATGGCAGGAATGCCGTAGTCCACGAGAGAGCGCCTGAGCTGGTCGTTACGGCCACCACGACTTGCTGTGGTTATGATCCGATGACAATATGCCCTCCTTGCATGTGCACTCATTCCTGTCCACCAAAAAGAAAACCAGGCCGCAGGAACGACTGA	4.72558	1	1
OK213_E_007	Conotoxin precursor	B1		OK213A_TRINITY_DN496_c0_g1_i11_Frame_F2	TERRSADATALKPEPVLLQKSAARSTDDNGKDTLTQMKRTLKKRGNVATDREEILETIRELNESGKR*	ACTGAACGCCGTTCGGCTGACGCCACAGCACTGAAACCTGAGCCTGTCCTCCTGCAAAAATCCGCTGCCCGCAGCACCGACGACAACGGCAAGGACACGTTGACTCAGATGAAGAGGACTCTCAAAAAGCGAGGAAACGTGGCCACAGACCGCGAAGAGATTTTGGAGACTATTAGAGAATTGAATGAAAGCGGAAAAAGATAA	6.26588	1	0
OK213_E_008	Conotoxin precursor	B1		OK213A_TRINITY_DN496_c0_g1_i2_Frame_F3	MQLYTHLYLLVPLVTFYLILGTGTLGDGGALTERRSADVTALKPEPVLLQKSAARSTSDNGKDRLTQMKRTLKKRGNVATDREEILETIRELNESGKR*	ATGCAGCTGTACACGCATCTGTATCTGCTGGTGCCCCTGGTGACCTTCTACCTAATCCTAGGCACGGGCACGCTAGGTGATGGAGGCGCACTGACTGAACGCCGTTCGGCTGACGTCACAGCGCTGAAACCTGAGCCTGTCCTCCTGCAGAAATCCGCTGCCCGCAGCACCAGCGACAATGGCAAGGACAGGCTGACTCAGATGAAGAGGACTCTCAAAAAGCGAGGAAACGTGGCCACAGACCGCGAAGAGATTTTGGAGACTATTAGAGAATTGAATGAAAGCGGAAAAAGATAA	8.8097	1	1
OK213_E_009	Conotoxin precursor	B1		OK213A_TRINITY_DN496_c0_g1_i8_Frame_F2	MQLYTHLYLLVPLVTFYLILGTGTLGDGGALTERRSADVTALKPEPVLLQKSAARSTSDNGKDRLTQMRRIFIKRGNTARGYEEDREVAETVRELDEHGKR*	ATGCAGCTGTACACGCATCTGTATCTGCTGGTGCCCCTGGTGACCTTCTACCTAATCCTAGGCACGGGCACGCTAGGTGATGGAGGCGCACTGACTGAACGCCGTTCGGCTGACGTCACAGCGCTGAAACCTGAGCCTGTCCTCCTGCAGAAATCCGCTGCCCGCAGCACCAGCGACAATGGCAAGGACAGGCTGACTCAGATGAGGAGGATTTTCATAAAGCGAGGAAACACGGCCAGAGGCTACGAAGAAGATAGAGAGGTAGCAGAGACTGTTAGAGAACTCGATGAACACGGAAAAAGATAA	4.25995	1	1
OK213_E_010	Conotoxin precursor	B1		OK213A_TRINITY_DN496_c0_g1_i5_Frame_F3	MQLYTHLYLLVPLVTFYLILGTGTLGDGGALTERRSADVTALKPEPVLLQKSAARSTSDNGKDRLTQMRRIFIKRGNTARGYEDDAEDVEYIGDLEEL*	ATGCAGCTGTACACGCATCTGTATCTGCTGGTGCCCCTGGTGACCTTCTACCTAATCCTAGGCACGGGCACGCTAGGTGATGGAGGCGCACTGACTGAACGCCGTTCGGCTGACGTCACAGCGCTGAAACCTGAGCCTGTCCTCCTGCAGAAATCCGCTGCCCGCAGCACCAGCGACAATGGCAAGGACAGGCTGACTCAGATGAGGAGGATTTTCATAAAGCGAGGAAACACGGCCAGAGGCTACGAAGACGATGCAGAGGATGTGGAGTATATTGGAGACCTCGAAGAACTTTGA	25057.1	1	1
OK213_E_011	Conotoxin precursor	B1		OK213A_TRINITY_DN24775_c0_g1_i1_Frame_R1	MQLFTCLCLLVPLMLFFHLTHPVTAGHERAATEVRSADHTLKRFVHHVHQAQKRGPVLSRTSTLQDPHNDDNDNDGDKKRRIDNLSVFLDMKVLAEIMKNQRKKIEEAKANLDHLGR*	ATGCAGCTCTTCACCTGCTTGTGTCTGCTGGTTCCACTCATGCTCTTCTTTCACCTGACCCACCCGGTCACGGCAGGCCACGAAAGGGCCGCCACGGAAGTCCGCTCGGCTGACCACACGCTGAAACGGTTTGTCCACCACGTCCACCAGGCCCAGAAACGTGGACCCGTGCTGTCCAGGACATCCACTCTCCAAGACCCTCACAACGATGACAACGACAACGATGGTGACAAGAAGAGGCGGATAGACAATCTCAGTGTGTTCTTGGATATGAAGGTTTTGGCAGAAATAATGAAGAACCAGAGGAAAAAAATAGAGGAAGCGAAGGCAAATCTGGATCATCTAGGTCGTTGA	0.726794	1	1
OK213_E_012	Conotoxin precursor	B2		OK213A_TRINITY_DN1593_c0_g1_i12_Frame_R1	MLRLIIAAVLASACLAFPQRRDGAPANVDPNLQPFGGVIPNMQPMQGMTGMPSPQFLPFNPNFAVGLKRENLEKRRHNPQFSDNNQSPFGSEGDLDSFMNFMKENGNNLPFADVNSAATDLGHFEPSDENEAGKFRFFDKQQ*	ATGTTGCGACTGATAATCGCCGCCGTCCTCGCCTCCGCCTGCCTCGCTTTCCCTCAAAGAAGGGATGGCGCCCCCGCAAACGTCGATCCCAACCTCCAGCCCTTTGGTGGGGTAATACCAAACATGCAGCCCATGCAGGGAATGACCGGAATGCCCAGTCCTCAATTCCTGCCTTTCAACCCTAACTTTGCCGTGGGATTGAAGAGGGAGAACCTAGAGAAGAGGAGACATAACCCTCAGTTCAGCGACAACAACCAATCTCCCTTTGGCTCGGAGGGTGACCTAGACAGCTTCATGAACTTCATGAAGGAAAACGGCAACAACCTTCCTTTCGCGGACGTGAATAGCGCCGCCACCGACCTTGGCCACTTCGAGCCCAGTGACGAAAACGAGGCCGGC…	62333.3	1	1
OK213_E_013	Conotoxin precursor	B2		OK213A_TRINITY_DN14175_c0_g1_i1_Frame_F1	MLRLIVAAVLASACLAFPQRRDGAPAHVDPNLQPFGGVIPNMQPMQGMTGMPSPQFLPFNPNFAVGLKRENLEKRRHNPQFSDNNQSPFVSEGDLDSFMNFMKENGNNLPFADVNSAATDLGHFEPSDENEAGKFRFFDKEQ*	ATGTTGCGACTGATAGTCGCCGCCGTCCTCGCCTCCGCCTGCCTCGCTTTCCCACAAAGAAGGGATGGCGCCCCCGCACACGTCGATCCCAACCTCCAGCCCTTTGGTGGGGTAATACCAAACATGCAGCCTATGCAGGGAATGACCGGAATGCCCAGTCCTCAATTCCTGCCTTTCAACCCTAACTTTGCCGTGGGATTGAAGAGGGAGAACCTAGAGAAGAGGAGACATAACCCTCAGTTCAGCGACAACAACCAATCTCCCTTTGTCTCGGAGGGTGACCTAGACAGCTTCATGAACTTCATGAAGGAAAACGGCAACAACCTTCCTTTCGCGGACGTGAATAGCGCCGCCACCGACCTTGGCCACTTCGAGCCCAGTGACGAAAACGAGGCCGGC…	28510.3	1	1
OK213_E_014	Conotoxin precursor	B2		OK213A_TRINITY_DN14225_c4_g1_i1_Frame_F3	PANVDPNLQPFGGVIPNMQPMQGMPGMPSPQCLPFKPNFAVGLKRENLEKRRHNPQFSDNNQSPFGSEGDLDSFVNFMKENGNNLPIADVNSAATVLG	CCCGCAAACGTCGATCCCAACCTCCAGCCCTTTGGTGGGGTAATACCTAACATGCAGCCCATGCAGGGAATGCCCGGAATGCCCAGTCCTCAATGTCTGCCTTTCAAACCTAACTTTGCCGTGGGATTGAAGAGGGAGAACCTAGAGAAGAGGAGACATAACCCTCAGTTCAGCGACAACAACCAATCTCCCTTTGGATCGGAGGGTGACCTAGACAGCTTCGTGAACTTCATGAAGGAAAACGGCAACAACCTTCCTATCGCGGACGTGAATAGCGCCGCCACCGTCCTTGGC	5.14906	0	0
OK213_E_015	Conotoxin precursor	B2		OK213A_TRINITY_DN17520_c0_g1_i4_Frame_F3	ANVDHNLQLFGGVIPNMQPMQGMTGMPRPQFLPFNPNFAVGLKRENLEKRRHNPQFSDNNQTPFGSEGDLDSVMNFMKEIGNNLPFADVNSAATALGHFEPSDENEAGKFRLFDKEQ*	GCAAACGTCGATCATAACCTCCAGCTCTTTGGTGGGGTAATACCAAACATGCAGCCCATGCAGGGAATGACCGGAATGCCCAGGCCTCAATTCCTGCCTTTCAACCCTAACTTTGCCGTGGGATTGAAGAGGGAGAACCTAGAGAAGAGGAGACATAACCCTCAGTTCAGCGACAACAACCAAACTCCCTTTGGCTCGGAGGGTGACCTAGACAGCGTCATGAACTTCATGAAGGAAATCGGCAACAACCTTCCTTTCGCGGACGTGAATAGCGCCGCCACCGCCCTTGGCCACTTCGAGCCCAGTGACGAAAACGAGGCCGGCAAGTTCCGCCTCTTTGACAAGGAACAATAA	13.1636	1	0
OK213_E_016	Conotoxin precursor	B2		OK213A_TRINITY_DN14225_c3_g1_i1_Frame_F3	MLRQIIAAVLASACLAFPQRGDGAPANVDPNHQPFGGVIPNMQPMQGMTGMPSPQFRPFNTKFAVGLKR*	ATGTTGCGACAGATAATCGCCGCCGTCCTCGCCTCCGCCTGCCTCGCTTTCCCCCAAAGAGGGGATGGCGCCCCCGCAAACGTCGATCCCAACCACCAGCCCTTTGGTGGGGTAATACCAAACATGCAGCCCATGCAGGGAATGACCGGAATGCCCAGTCCTCAATTCCGGCCTTTCAACACTAAGTTTGCCGTGGGCTTGAAGAGGTAA	3.96252	1	1
OK213_E_017	Conotoxin precursor	B2		OK213A_TRINITY_DN21141_c0_g1_i1_Frame_F2	MLRLIIAAVLVCACLAYPQKRDGAPADAANLQGFDQGMMAMPNMQPMQPMPMMGMQGQFMPFNPGFGAMGYKRDLDEDLEQKRHHSQFNEDNISPFNTEEGLGNFMNFMDNGNNLPFANMDSDDLGLDSFQPSAENEEGKFRFFDGQQ*	ATGTTGCGACTGATAATCGCCGCCGTGCTCGTCTGCGCCTGCCTCGCTTACCCTCAAAAGAGAGATGGCGCCCCCGCAGACGCGGCCAACCTTCAGGGCTTTGATCAGGGAATGATGGCCATGCCCAACATGCAGCCAATGCAGCCAATGCCAATGATGGGAATGCAGGGTCAATTCATGCCTTTCAACCCTGGCTTTGGTGCCATGGGATACAAGAGGGATCTGGATGAGGACCTAGAGCAGAAGAGACATCACTCGCAGTTCAACGAGGACAACATCTCTCCCTTTAACACCGAGGAAGGCCTAGGAAACTTCATGAACTTCATGGACAACGGCAACAACCTCCCGTTCGCGAACATGGATAGCGACGACCTTGGCCTTGACAGCTTCCAGCCCAGC…	1.06446	1	1
OK213_E_018	Conotoxin precursor	B2		OK213A_TRINITY_DN1593_c0_g1_i2_Frame_R2	MLRLIIAAVLASACLAFPQRRDGAPANAAPNLQPFNGEMAMPNMQPMHALPMSMSGMSSPQLMPLNPNLGMGFKRENLEKRRQHSQFSDDNKSPFDSEDGLGNFMNFMKENGNNLPFADVNSAATDLGHFEPSAENEDGKFRFFD	ATGTTGCGACTGATAATCGCCGCCGTCCTCGCCTCCGCCTGCCTCGCTTTCCCTCAAAGAAGGGATGGCGCCCCCGCAAACGCCGCCCCCAACCTCCAGCCCTTTAATGGGGAAATGGCCATGCCCAACATGCAGCCCATGCACGCATTGCCCATGTCCATGTCCGGAATGTCCAGTCCTCAATTGATGCCTTTGAACCCTAACCTTGGCATGGGATTCAAGAGGGAGAACCTAGAGAAGAGAAGACAGCACTCTCAGTTCAGCGACGACAACAAATCTCCCTTTGACTCGGAGGATGGCCTAGGAAACTTCATGAACTTCATGAAGGAAAACGGCAACAACCTTCCTTTCGCGGACGTGAATAGCGCCGCCACCGACCTTGGCCACTTCGAGCCCAGC…	36.9392	0	0
OK213_E_019	Conotoxin precursor	B2		OK213A_TRINITY_DN1593_c0_g1_i7_Frame_R1	MLRLITAAVLVSACLAYPQKKEDAPADTADLQGFGQPMPAMPNMQGMQMPGMQMPGMPMQNPFLPFGMGFKRDLDEDLEKRKHHSKFNEGNNSPFGSEADPESFMNFMKGNGDNFPFANMDSADTADLGNFQPSENEDGKFRFFDKQQ*	ATGTTGCGACTGATAACCGCCGCCGTGCTCGTCTCCGCCTGCCTCGCTTACCCGCAAAAAAAAGAGGACGCCCCCGCAGACACGGCCGACCTCCAGGGCTTTGGTCAGCCAATGCCGGCCATGCCCAACATGCAGGGAATGCAAATGCCGGGAATGCAAATGCCGGGAATGCCAATGCAGAATCCATTCCTGCCTTTCGGCATGGGATTCAAGAGGGATCTGGATGAGGACTTAGAGAAGAGGAAGCACCACTCGAAGTTCAACGAGGGCAACAATTCTCCCTTTGGCTCAGAGGCTGACCCAGAAAGCTTCATGAACTTCATGAAGGGAAACGGCGACAACTTCCCGTTCGCGAACATGGATAGCGCCGACACTGCTGACCTTGGCAACTTCCAGCCC…	4.90413	1	1
OK213_E_020	Conotoxin precursor	C		OK213A_TRINITY_DN92_c0_g1_i1_Frame_R2	MQTAYWVVMWMMMVWITAPLSEGGKLNDVIRGLVPDDLTLQRMFETPVSHRLSDGRNLTVYICTWKLCPPSPWRRPHGKR*	ATGCAGACGGCCTACTGGGTGGTGATGTGGATGATGATGGTGTGGATTACAGCCCCTCTGTCTGAAGGCGGTAAACTGAACGACGTAATTCGGGGTTTGGTGCCAGACGACTTAACCCTACAGCGTATGTTCGAAACTCCGGTTTCCCATCGTCTTTCTGACGGCAGAAATTTGACGGTATACATATGTACCTGGAAGTTATGTCCACCTTCCCCATGGAGACGACCACATGGAAAAAGATGA	98.3859	1	1
OK213_E_021	Conotoxin precursor	C		OK213A_TRINITY_DN92_c0_g1_i3_Frame_R3	MQTAYWVVMWMMMVWITAPLSEGGKLNDVIRGLVPDDLTLQRMFKSLFSHRLSGGTYSRVDTCIWKVCPQSP*	ATGCAGACGGCCTACTGGGTGGTGATGTGGATGATGATGGTGTGGATTACAGCCCCTCTGTCTGAAGGCGGTAAACTGAACGACGTAATTCGGGGTTTGGTGCCAGACGACTTAACCCTACAGCGTATGTTCAAAAGTCTGTTTTCCCATCGTCTTTCTGGCGGCACATATTCGAGGGTAGACACATGCATCTGGAAGGTATGTCCACAATCTCCATAG	6903.08	1	1
OK213_E_022	Conotoxin precursor	Con-ikot-ikot	Con-ikot-ikot-2	OK213A_TRINITY_DN15_c3_g1_i2_Frame_F1	MAMNMWMTISVCVVVVMATTVVGSTPLQERGLSLDERRAIGCCAWQVYDCLVQRGHYWYICYSWASWICTRGLSDRCCPGLERCIRRCVSGYRNVCYYHCIFESC*	ATGGCCATGAACATGTGGATGACGATCAGCGTGTGTGTAGTGGTTGTCATGGCGACCACTGTCGTTGGCTCCACTCCGTTACAAGAACGAGGCCTCAGCCTCGATGAACGCCGTGCCATTGGATGTTGCGCCTGGCAAGTTTATGACTGTCTCGTACAACGGGGGCACTATTGGTATATTTGCTACAGCTGGGCCTCCTGGATTTGTACACGTGGCCTTTCTGATAGATGTTGCCCTGGACTTGAGCGCTGTATTCGAAGATGCGTGTCGGGCTATAGAAACGTCTGCTATTACCACTGCATATTTGAAAGTTGCTGA	62691.2	1	1
OK213_E_023	Conotoxin precursor	Con-ikot-ikot	Con-ikot-ikot-2	OK213A_TRINITY_DN13914_c0_g1_i1_Frame_R2	MNMWMTISECVVVVIATTVVGSTPLQERGLSLAERRAIGCCAWQVYDCLLQRGHYLYICYSWASWICTR	ATGAACATGTGGATGACGATCAGCGAGTGTGTAGTGGTTGTCATAGCGACCACTGTCGTTGGCTCCACTCCGTTACAAGAACGAGGCCTCAGCCTCGCTGAACGCCGTGCCATTGGATGTTGCGCCTGGCAAGTTTATGACTGTCTCCTACAACGGGGGCACTATTTGTATATTTGCTACAGCTGGGCCTCCTGGATTTGTACACGT	2.05124	0	0
OK213_E_024	Conotoxin precursor	Con-ikot-ikot	Con-ikot-ikot-2	OK213A_TRINITY_DN24529_c0_g1_i1_Frame_F2	VGPTLLQERGLSLDARRAIGCCAWLVYDCLVQRVHYWYICYSWASWICTLGLSDRCCSGLERCIRRCVS	GTTGGCCCCACTCTGTTACAAGAACGAGGCCTCAGCCTCGATGCACGCCGTGCCATTGGATGTTGCGCCTGGCTAGTTTATGACTGTCTCGTACAACGGGTGCACTATTGGTATATTTGCTACAGCTGGGCCTCCTGGATTTGTACACTTGGCCTTTCTGATAGATGTTGCTCTGGACTTGAGCGCTGCATTCGAAGATGCGTGTCG	1.3672	0	0
OK213_E_025	Conotoxin precursor	Con-ikot-ikot	Con-ikot-ikot-4	OK213A_TRINITY_DN413_c4_g1_i1_Frame_R3	MAMNVWMTISVFVVVVMATTVIGSTVSHEQKRDRSSRKCCATKAYQCLRDHKCFEPIDYKCGQPCKNTDTTSCRPTAGDNCCMIYKHCLVECQIFRSDRRGDQLLYCYELCSDSYPC*	ATGGCCATGAACGTGTGGATGACGATCAGCGTGTTTGTAGTGGTTGTCATGGCAACCACTGTCATTGGCTCCACTGTATCACATGAACAAAAACGCGACCGCAGCAGCAGAAAATGTTGCGCCACAAAAGCATACCAATGTCTTCGAGATCATAAATGCTTTGAACCGATTGATTACAAGTGTGGGCAACCGTGCAAAAATACAGATACTACAAGCTGTAGACCTACTGCTGGTGACAACTGTTGCATGATTTACAAGCACTGTCTGGTGGAATGCCAGATTTTTCGTTCAGATAGACGCGGAGATCAACTGCTTTACTGCTATGAACTTTGCAGCGACTCGTACCCTTGTTAG	2063.43	1	1
OK213_E_026	Conotoxin precursor	Conkunitzin	Conkunitzin-3	OK213A_TRINITY_DN1597_c0_g1_i6_Frame_R2	MEGRGLAVVLILASCLSALTVGDKRSLPAVCLQPVVVGPCAASVQRYYFNHHSDICQPFVYGGCNGNGNRFITMAACVNTCKSPSVAIVVD*	ATGGAGGGACGTGGTTTGGCTGTTGTTCTGATTCTGGCCAGTTGTCTGTCTGCCTTGACTGTTGGCGATAAGAGATCACTACCTGCCGTGTGCCTTCAACCCGTGGTGGTTGGGCCGTGCGCAGCCAGCGTCCAAAGGTATTACTTCAACCACCATTCAGACATCTGCCAGCCGTTCGTTTACGGGGGATGTAACGGCAACGGAAACAGATTTATTACCATGGCTGCGTGCGTGAATACATGCAAAAGCCCGTCGGTGGCAATTGTAGTTGACTGA	3.14509	1	1
OK213_E_027	Conotoxin precursor	Conkunitzin	Conkunitzin-5	OK213A_TRINITY_DN13461_c0_g1_i1_Frame_R3	MATFNIVLAALFASVILVDFAVQARRCHPPCEYGERCVSANRRERRHRHNNVCVPVRCLFQARRGRCLNFDRRYHFNTLTMSCTRVHTGACYGRNNRFSSSENCELTCAPRR*	ATGGCCACTTTCAACATCGTCCTCGCTGCTTTGTTCGCTTCTGTTATCCTTGTCGACTTTGCTGTTCAGGCAAGACGGTGCCACCCGCCATGCGAATACGGGGAACGTTGTGTATCTGCCAACAGGCGAGAGAGAAGACACCGCCACAACAATGTCTGTGTGCCTGTACGCTGCCTGTTCCAAGCCCGTCGGGGCCGCTGCCTCAACTTCGATCGTCGCTACCACTTCAACACCTTGACCATGAGCTGCACGCGCGTGCACACGGGCGCCTGCTACGGCCGCAACAACCGCTTCAGCTCCAGCGAGAACTGCGAACTGACCTGCGCCCCGAGACGATGA	1.0265	1	1
OK213_E_028	Conotoxin precursor	Conkunitzin	Conkunitzin-8	OK213A_TRINITY_DN37189_c0_g1_i1_Frame_R1	ARPQFTLPLVLFQELSSDKDTHQQSAHRKTDTLPDASRVEGLPSVCSLPKVVGPCRALIPRFYFNSTQLECLPFAYGGCDGNDNNFETYSDCQASCR*	GCACGTCCGCAGTTCACACTGCCATTGGTTCTGTTTCAAGAACTGTCGTCAGACAAGGACACACATCAACAGTCTGCCCACAGAAAAACCGACACTCTCCCAGACGCTAGCCGGGTGGAAGGTTTGCCGTCGGTGTGTTCGCTGCCCAAAGTGGTGGGCCCATGCAGGGCCTTAATCCCCCGTTTCTACTTCAACAGCACCCAGCTAGAGTGCCTTCCCTTTGCCTACGGAGGCTGCGATGGCAACGACAATAACTTTGAGACGTATTCTGACTGTCAGGCGTCGTGCCGCTGA	0.316487	1	0
OK213_E_029	Conotoxin precursor	Conkunitzin	Conkunitzin-9	OK213A_TRINITY_DN3548_c0_g1_i1_Frame_F1	MDARRVVAVLLVLSMARSVPRKDPRCYEPFDLGDSTCRTLRIRFYYNQENKKCQTFQYTGCGGNGNNFPDLYACKECCEWDMTCY*	ATGGACGCACGTCGTGTAGTTGCCGTTCTCCTGGTTCTCTCCATGGCCCGCTCTGTGCCAAGAAAAGATCCGAGGTGCTACGAGCCCTTCGATTTGGGGGATTCCACGTGCCGTACCCTAAGGATAAGGTTTTATTACAACCAAGAAAATAAGAAATGTCAAACCTTTCAGTACACTGGATGTGGAGGCAACGGCAACAACTTTCCCGATCTCTATGCCTGTAAAGAATGTTGCGAGTGGGACATGACTTGTTATTAA	269.153	1	1
OK213_E_030	Conotoxin precursor	Conkunitzin	Conkunitzin-9	OK213A_TRINITY_DN3548_c0_g1_i2_Frame_F1	MDARRVVAVLLVLSMARSVPRKDPRCYEPLDSGDSRGPTQSTRFYYNQEKKKCQTFQCTECGGNGNNFPDLYACKECCEWDMTCY*	ATGGACGCACGTCGTGTAGTTGCCGTTCTCCTGGTTCTCTCCATGGCCCGCTCTGTGCCAAGAAAAGATCCGAGGTGCTACGAGCCCTTGGATTCGGGGGATTCCAGGGGCCCTACCCAAAGCACAAGGTTCTATTACAACCAAGAAAAAAAGAAATGTCAAACCTTTCAGTGCACTGAATGTGGAGGCAACGGCAACAACTTTCCCGATCTCTATGCCTGTAAAGAATGTTGCGAGTGGGACATGACTTGTTATTAA	4.63352	1	1
OK213_E_031	Conotoxin precursor	Conkunitzin	Conkunitzin-11	OK213A_TRINITY_DN22602_c0_g1_i1_Frame_R2	MGNMWVVLVCLLGLCLFANADDRCTLQPSSGTCPGYFPRWFYNSASGQCQRFIYSGCKGNANNYLSEEECHQACVSR*	ATGGGAAACATGTGGGTCGTTCTCGTCTGTCTTCTCGGTCTTTGTCTCTTCGCTAACGCTGATGACCGCTGCACACTGCAGCCGTCCAGCGGCACCTGTCCAGGCTACTTCCCCCGCTGGTTCTATAACTCGGCCAGTGGTCAGTGCCAGCGCTTCATATACAGCGGATGTAAAGGCAACGCCAACAACTATCTGTCCGAGGAGGAATGCCACCAGGCTTGCGTCAGTCGTTGA	1.91389	1	1
OK213_E_032	Conotoxin precursor	Conkunitzin	Conkunitzin-11	OK213A_TRINITY_DN33946_c0_g1_i1_Frame_R1	LCANADDRCTLPPVTGVCMAYFPRWHYDSTSGQCQQFVWGGCGGNANNFLSKDECVQACGDH*	CTCTGTGCTAACGCCGATGACCGGTGCACGCTGCCGCCAGTCACAGGTGTGTGTATGGCCTACTTCCCTCGCTGGCACTATGACTCCACTAGTGGCCAGTGTCAACAGTTCGTGTGGGGTGGGTGTGGAGGCAACGCCAACAACTTCCTGTCTAAAGATGAATGCGTCCAGGCTTGTGGCGATCACTGA	1.70998	1	0
OK213_E_033	Conotoxin precursor	Conkunitzin	Conkunitzin-12	OK213A_TRINITY_DN2869_c2_g1_i1_Frame_R3	MTPSTSVLHLSFITPYCCSLHPERNMDALRFSAVLLILAMACFITVSAGACEKPKVEGTGSQSISSYFFNSASGTCDTFVYKGGNDDPFPNRFNSHPVCENVCKCKLRMDPGTGERLRTRYYHNTDGSRCLPFQYRGTGGNANNFLSESACEMECEL*	ATGACACCGTCCACGTCAGTGCTACATTTGTCTTTCATCACGCCATATTGCTGTTCTCTCCATCCAGAACGTAACATGGACGCACTACGTTTTTCTGCCGTTCTTCTGATTCTGGCCATGGCCTGCTTTATAACAGTGTCGGCAGGGGCTTGCGAAAAACCCAAGGTCGAAGGAACCGGGAGTCAAAGTATCAGCAGTTACTTCTTCAACAGTGCTAGCGGCACGTGCGACACGTTTGTCTACAAAGGAGGAAACGACGACCCGTTCCCCAATAGGTTTAACAGCCATCCCGTCTGTGAGAATGTTTGCAAGTGCAAACTAAGGATGGATCCGGGGACAGGCGAAAGACTCCGAACCAGGTATTATCACAACACTGACGGCAGCAGGTGCCTACCTTTT…	2.01653	1	1
OK213_E_034	Conotoxin precursor	D	D-1	OK213A_TRINITY_DN76_c0_g1_i2_Frame_F1	MPRLEMMLLVLLILPLPYFNAAGGQAVPGDGQGDGLDSDLLRGDRAVQRACYTSQPGSEWGKCCLTKMCGDKCCHTIHCRCVSGDFKGQGCSC*	ATGCCAAGACTGGAAATGATGCTGCTGGTTCTGCTGATTTTGCCTCTGCCCTATTTTAATGCGGCAGGGGGGCAAGCGGTACCAGGGGACGGGCAAGGCGATGGATTGGACAGTGACCTCCTACGTGGTGACAGAGCCGTTCAAAGGGCGTGTTACACTAGTCAACCAGGCTCAGAATGGGGAAAGTGCTGCCTGACTAAGATGTGCGGTGACAAGTGCTGTCACACAATCCACTGCCGCTGCGTCTCTGGTGATTTCAAAGGCCAAGGGTGTTCCTGCTGA	324.113	1	1
OK213_E_035	Conotoxin precursor	D	D-1	OK213A_TRINITY_DN76_c0_g1_i8_Frame_F1	MPRLEMMLLVLLILPLPYFNAAGGQAVPGDGQGDGLDSDLLRGDRAVYRACYYHQPNSPWGRCCPTKMCGSKCCDRANCRCVSHADRGQGCSC*	ATGCCAAGACTGGAAATGATGCTGCTGGTTCTGCTGATTTTGCCTCTGCCCTATTTTAATGCGGCAGGGGGGCAAGCGGTACCAGGGGACGGGCAAGGCGATGGATTGGACAGTGACCTCCTACGTGGTGACAGAGCCGTTTATAGGGCGTGCTACTATCATCAACCAAACTCACCATGGGGACGGTGCTGCCCGACCAAGATGTGCGGTAGTAAGTGCTGTGACCGGGCGAACTGCCGCTGCGTCTCTCATGCAGACAGGGGACAGGGGTGTTCCTGCTGA	511.632	1	1
OK213_E_036	Conotoxin precursor	E	E-1	OK213A_TRINITY_DN4232_c0_g1_i1_Frame_F1	MTRVFLAMFFLLALTEGWPRLYDRDCERGRNMHYTCTQLEQCGVIRKMNGQLTCELRCSCTPGKSCLHGENIDWDNMNTKIYHCPWP*	ATGACGCGTGTGTTCCTTGCGATGTTCTTCCTCTTGGCGCTAACAGAGGGATGGCCACGTCTGTATGATAGGGACTGTGAGAGGGGGCGAAATATGCATTACACGTGCACACAATTAGAGCAGTGTGGGGTCATTCGTAAGATGAACGGACAATTGACGTGCGAGCTGAGATGTAGCTGTACACCTGGAAAAAGCTGTCTTCACGGTGAAAACATCGATTGGGATAACATGAATACCAAAATCTACCACTGCCCGTGGCCCTAG	2.56314	1	1
OK213_E_037	Conotoxin precursor	E	E-2	OK213A_TRINITY_DN4736_c0_g1_i2_Frame_F1	MMTRVFFAMFFLMALTEGWPRLYDSDCVRGRNMHITCFKDQTCGLTVKRNGRLNCSLTCSCRRGESCLHGEYIDWDSRGLKVHICPKPWF*	ATGATGACACGTGTGTTCTTTGCGATGTTCTTCCTCATGGCACTAACAGAGGGATGGCCACGTCTGTATGATAGCGACTGTGTGAGGGGGCGTAATATGCATATCACGTGCTTTAAAGATCAGACATGTGGATTGACTGTAAAGCGGAACGGAAGATTGAACTGCAGCCTGACCTGTAGCTGTAGACGTGGAGAAAGCTGTCTTCACGGTGAATACATCGATTGGGATAGCAGGGGTCTCAAAGTGCACATCTGCCCGAAACCCTGGTTTTAA	6.89987	1	1
OK213_E_038	Conotoxin precursor	E	E-2	OK213A_TRINITY_DN4736_c0_g1_i1_Frame_F1	MMTRVFFAMFFLMALTEGWPRLYDSDCVRGRNMHITCFKDQSCGLIVKRNGRLSCSLNCKCRRNESCLPSEEVDWDHRDMKIVICPKPWF*	ATGATGACACGTGTGTTCTTTGCGATGTTCTTCCTCATGGCACTAACAGAGGGATGGCCACGTCTGTATGATAGCGACTGTGTGAGGGGGCGTAATATGCATATCACGTGCTTTAAAGATCAGTCATGTGGACTGATTGTAAAGCGGAACGGAAGATTGAGCTGCTCACTGAACTGTAAGTGTAGACGTAACGAAAGCTGTCTTCCGAGTGAAGAAGTCGACTGGGATCACAGGGATATGAAAATAGTCATCTGCCCGAAACCCTGGTTTTGA	1.91663	1	1
OK213_E_039	Conotoxin precursor	F	F-1	OK213A_TRINITY_DN610_c1_g2_i1_Frame_F1	SQAAADVYDLMDPDVLAMIDVGKKMMHACSIANKHIDDPWWMLDVLDFKEKSVYYTMMSDLVTCLNHF	TCCCAGGCCGCTGCCGATGTGTATGATTTGATGGATCCTGACGTGTTGGCCATGATCGACGTGGGAAAGAAAATGATGCACGCCTGTTCCATAGCCAATAAACACATTGACGACCCATGGTGGATGTTGGACGTTTTGGACTTTAAAGAAAAGAGTGTATACTATACAATGATGAGCGATTTGGTAACCTGCCTGAACCATTTT	2.12383	0	0
OK213_E_040	Conotoxin precursor	F	F-1	OK213A_TRINITY_DN610_c1_g1_i6_Frame_F1	MQRGAVLLGVVAFLALWSQAAAEEYDLNDPDVLAIVDEGQKLMHACSIANKYTYDPWWKLNILAFKEMRVYHSMMSDMVTCLNHFSRRRHEEH*	ATGCAGAGAGGGGCCGTGCTGCTTGGGGTGGTCGCCTTCCTTGCCCTGTGGTCCCAGGCCGCTGCCGAGGAGTACGATTTGAACGATCCTGACGTGTTGGCCATAGTCGACGAGGGACAGAAATTGATGCACGCCTGTTCCATTGCCAATAAATACACATACGACCCATGGTGGAAGTTGAACATTTTGGCCTTTAAAGAAATGAGAGTATACCATTCAATGATGAGCGATATGGTAACCTGCCTGAACCATTTTTCCCGGAGAAGACATGAAGAACATTAA	46614.5	1	1
OK213_E_041	Conotoxin precursor	F	F-1	OK213A_TRINITY_DN610_c1_g1_i4_Frame_F1	MQRGAVLLGVVAFLALWSQAAAEEYDLNDPDVLAIVDEGQKLMHACSIANKYTYDPWWKLNILAFKEMRVYHSMMSDMVTCLNHFFRRR	ATGCAGAGAGGGGCCGTGCTGCTTGGGGTGGTCGCCTTCCTTGCCCTGTGGTCCCAGGCCGCTGCCGAGGAGTACGATTTGAACGATCCTGACGTGTTGGCCATAGTCGACGAGGGACAGAAATTGATGCACGCCTGTTCCATTGCCAATAAATACACATACGACCCATGGTGGAAGTTGAACATTTTGGCCTTTAAAGAAATGAGAGTATACCATTCAATGATGAGCGATATGGTAACCTGCCTGAACCATTTTTTCCGGAGAAGA	20292.4	0	0
OK213_E_042	Conotoxin precursor	F	F-1	OK213A_TRINITY_DN17569_c0_g1_i1_Frame_F3	FLSLWSQAAAEEYDLNDPEVVAMVDEGQKLKHACSIANKYTYGPWWKLNILAFNEMRVYHSMMSDMVTCLNHFFRRRLEEH*	TTCCTTTCCCTGTGGTCCCAGGCCGCTGCGGAGGAGTACGATTTGAACGATCCTGAAGTGGTGGCGATGGTCGACGAGGGACAGAAATTGAAGCACGCCTGTTCCATTGCCAATAAATACACATACGGCCCATGGTGGAAGTTGAACATTTTGGCCTTTAATGAAATGAGAGTATACCATTCAATGATGAGCGATATGGTAACCTGCTTGAACCATTTTTTCCGGAGAAGACTTGAAGAACATTAA	2.06213	1	0
OK213_E_043	Conotoxin precursor	H	H-1a	OK213A_TRINITY_DN2187_c0_g1_i1_Frame_F3	MNSAGRLLLLCLALGLVFESLGIPVADDVKADRDTDPGDKDARGFYHGRTQDDCGGTQCYIACCETIDGEEKCKELECDAISQTEPVRN*	ATGAACTCCGCTGGCCGTCTCCTGCTTCTGTGCCTCGCTCTGGGCCTGGTGTTCGAGTCTCTGGGAATACCCGTGGCTGATGACGTAAAAGCTGACAGAGACACCGATCCTGGCGACAAAGATGCAAGGGGTTTTTACCACGGGAGGACCCAGGATGATTGCGGCGGAACACAATGTTATATCGCCTGCTGTGAAACAATCGACGGGGAAGAAAAATGCAAAGAGCTTGAGTGTGATGCGATCTCACAGACAGAGCCTGTGAGAAACTGA	9.90114	1	1
OK213_E_044	Conotoxin precursor	H	H-1a	OK213A_TRINITY_DN2187_c0_g1_i2_Frame_F3	MNSAGRLLLLCLALGLVFESLGIPVADDVKADRDTDPGDKDARGFYYWRAQVDCGGTLCEFGCCKPINGEDECRELDCD*	ATGAACTCCGCTGGCCGTCTCCTGCTTCTGTGCCTCGCTCTGGGCCTGGTGTTCGAGTCTCTGGGAATACCCGTGGCTGATGACGTAAAAGCTGACAGAGACACCGATCCTGGCGACAAAGATGCAAGGGGTTTTTACTACTGGAGGGCCCAGGTGGATTGCGGCGGTACGCTATGTGAGTTCGGCTGCTGTAAACCAATCAACGGGGAAGACGAATGCAGAGAGCTTGATTGTGATTAG	866.434	1	1
OK213_E_045	Conotoxin precursor	H	H-1a	OK213A_TRINITY_DN7198_c0_g1_i2_Frame_R1	LCLALGLVFESLGIPVADDVETHRDADPDDGDPRGRNSWRSTDCNGVPCQFGCCVTINGNDECRELDC*	CTGTGCCTCGCTCTGGGCCTGGTGTTCGAGTCTCTGGGAATACCCGTGGCTGATGACGTAGAAACACACAGAGACGCAGATCCTGACGACGGAGATCCAAGGGGTCGTAACTCCTGGAGGTCCACGGATTGCAACGGTGTACCATGCCAGTTCGGCTGCTGCGTTACAATCAACGGGAATGATGAATGCAGGGAACTTGACTGTTAG	2.05105	1	0
OK213_E_046	Conotoxin precursor	H	H-2a	OK213A_TRINITY_DN4082_c0_g1_i1_Frame_F2	MRTSGKLLLLCLAVGLLLESQNADAGDATRDVGSDRTSVELSKMLKRWQAEKGQRKASARDEEGGFYIFDPNRRSFY*	ATGAGAACCAGCGGCAAACTCCTGCTTCTGTGCCTCGCTGTGGGACTGCTGTTGGAGTCTCAGAATGCCGATGCTGGAGATGCTACCAGAGACGTGGGTTCTGACAGAACATCAGTGGAGCTGTCAAAGATGCTTAAAAGATGGCAAGCTGAGAAAGGACAGAGAAAGGCCAGTGCTCGTGACGAAGAGGGCGGTTTTTACATTTTTGATCCTAATCGCCGATCATTTTACTAA	6.50722	1	1
OK213_E_047	Conotoxin precursor	H	H-2a	OK213A_TRINITY_DN54_c1_g1_i12_Frame_R1	MRTNGRLLFLCLAVGLLLESQAHPIADAGDATRNVGSDGTSVELSKMIERGQVSSAEKGLEKASAHGRDIVYIVYKPDHDVPFPN*	ATGAGGACTAACGGCCGACTCCTGTTTCTGTGCCTTGCTGTGGGACTGCTGTTGGAGTCTCAGGCACACCCCATTGCGGATGCTGGAGATGCTACCAGAAACGTGGGTTCTGACGGAACATCAGTGGAGCTGTCAAAGATGATTGAAAGAGGGCAAGTTTCGTCAGCTGAGAAAGGACTGGAAAAGGCCAGTGCTCATGGTCGTGACATTGTCTACATTGTCTATAAACCTGACCATGACGTACCTTTTCCAAATTAA	176.73	1	1
OK213_E_048	Conotoxin precursor	H	H-2a	OK213A_TRINITY_DN7742_c0_g1_i1_Frame_F2	LFLCLAVGLLLESQAHPIANDGDATRNVGSDGISVELPKMIERGQDSSAEKGQEKASAHGRDMVYVFYTPDHDIPFPH*	CTGTTTCTGTGCCTTGCTGTGGGACTGCTGTTGGAGTCTCAGGCACACCCCATTGCTAATGATGGCGATGCAACCCGAAACGTGGGTTCTGACGGAATATCAGTGGAGCTGCCAAAGATGATTGAAAGAGGGCAAGATTCGTCAGCTGAGAAAGGACAGGAAAAGGCCAGTGCTCATGGTCGTGACATGGTCTACGTTTTCTATACACCTGACCATGACATACCTTTTCCACATTAA	0.777789	1	0
OK213_E_049	Conotoxin precursor	H	H-2a	OK213A_TRINITY_DN7742_c0_g1_i2_Frame_F2	LFLCLAVGLLLESQAHPIANDGDATRNVGSDGISVELPKMIERGQDSGQEKTSAHGRGIVYVYYAPDHDIPFPH*	CTGTTTCTGTGCCTTGCTGTGGGACTGCTGTTGGAGTCTCAGGCACACCCCATTGCTAATGATGGCGATGCAACCCGAAACGTGGGTTCTGACGGAATATCAGTGGAGCTGCCAAAGATGATTGAAAGAGGGCAAGATTCAGGACAAGAAAAGACCAGTGCTCATGGTCGTGGCATTGTCTACGTTTACTATGCACCTGACCATGACATACCTTTTCCACATTAA	4.15631	1	0
OK213_E_050	Conotoxin precursor	H	H-2b	OK213A_TRINITY_DN2187_c0_g2_i1_Frame_F2	MRTSSQLLFLCVSMGLVFALLGHPIADVRDAAGGADSEERSMQGSQTVEEKEASSSERGVLNCDSPSGEC*	ATGAGAACCAGCAGCCAACTCCTGTTTCTCTGCGTCTCTATGGGACTGGTGTTTGCGCTTCTGGGACATCCCATTGCTGATGTCAGAGACGCTGCCGGAGGCGCAGATTCGGAAGAGAGATCCATGCAGGGATCTCAAACCGTTGAAGAAAAAGAGGCGTCATCGTCTGAGAGGGGGGTCCTGAACTGCGATAGCCCATCGGGCGAATGCTAG	3179.46	1	1
OK213_E_051	Conotoxin precursor	I1	I1-1	OK213A_TRINITY_DN2065_c1_g1_i1_Frame_R3	MKLALTFLLILMILPLMTGVKKSGDRERRSVKSMRDVFRDHRQFECVEGGENCRADSNCCSRVCCQLSTGKRCAFKQTVGCDDIHLN*	ATGAAGTTGGCTCTGACATTTCTTCTGATTCTGATGATTCTGCCCTTGATGACTGGGGTGAAGAAGTCTGGTGACCGTGAGCGGAGGAGTGTTAAATCAATGAGAGATGTCTTTCGTGATCATCGGCAATTCGAGTGCGTCGAGGGCGGAGAAAACTGTCGAGCGGACAGCAACTGCTGTAGCCGTGTATGCTGTCAGTTATCGACAGGGAAACGATGCGCATTTAAACAAACAGTGGGTTGCGATGACATCCATCTCAATTAG	2028.92	1	1
OK213_E_052	Conotoxin precursor	I1	I1-2	OK213A_TRINITY_DN150_c2_g1_i14_Frame_R3	MKLCVTFLLLLVILPTVTGEKSSERTLSGAKGDRRRCVTVGERCEQFSNCCGGMCCVGDRCVMTGFPCVF*	ATGAAGCTGTGTGTGACGTTTCTTCTTCTTCTGGTGATTCTGCCAACAGTGACTGGGGAGAAGTCCAGCGAGCGTACACTGAGTGGTGCTAAAGGTGATCGGAGAAGATGCGTAACCGTTGGAGAAAGATGCGAACAGTTTTCCAACTGCTGTGGGGGGATGTGTTGTGTCGGCGACAGGTGTGTTATGACTGGCTTTCCATGTGTCTTCTAG	5530.3	1	1
OK213_E_053	Conotoxin precursor	I1	I1-2	OK213A_TRINITY_DN4982_c0_g1_i4_Frame_R3	MKLCVTFLLVLVILPSVTGEKSGERTLRGDSLVGDWGTCSDRGQECKHDYDCCDDLCCTGITCQFTYFSCK*	ATGAAGCTGTGTGTGACGTTTCTTCTTGTTCTGGTGATTCTGCCATCAGTAACTGGGGAGAAGTCTGGCGAGCGTACACTGCGTGGTGATTCGCTGGTAGGCGATTGGGGAACGTGCTCAGACAGAGGACAAGAATGCAAACATGATTACGACTGCTGTGACGATTTGTGTTGTACCGGCATAACGTGCCAATTCACTTACTTTTCATGTAAATGA	1.21507	1	1
OK213_E_054	Conotoxin precursor	I1	I1-2	OK213A_TRINITY_DN4982_c0_g1_i2_Frame_R3	MKLCVTFLLVLVILPSVTGEKSSERTLSGAALRGDRGMCSDIGQGCGQDSDCCGDMCCVVQRCVMTIITCTF*	ATGAAGCTGTGTGTGACGTTTCTTCTTGTTCTGGTGATTCTGCCATCAGTAACTGGGGAGAAGTCTAGCGAGCGTACACTGAGTGGTGCTGCTCTGAGAGGCGATCGGGGAATGTGCTCAGACATAGGACAAGGATGCGGACAAGATTCCGACTGCTGTGGGGATATGTGCTGTGTCGTCCAAAGATGCGTTATGACTATCATAACATGTACGTTCTAA	4.2935	1	1
OK213_E_055	Conotoxin precursor	I1	I1-2	OK213A_TRINITY_DN4982_c0_g1_i3_Frame_R3	MKLCVTFLLILVILPSLTGEKSSERTLSGAALRDEWGTCSHIRQGCKHDSDCCGHLCCTGKSCVMTIMPCNLFPF*	ATGAAGCTGTGTGTGACGTTTCTTCTTATTCTGGTGATTCTGCCATCACTGACTGGGGAGAAGTCTAGCGAGCGTACACTGAGTGGTGCTGCTCTGAGAGACGAATGGGGAACGTGCTCACACATACGACAAGGATGCAAACATGATTCCGACTGCTGTGGGCATTTGTGTTGTACCGGCAAATCGTGCGTTATGACTATCATGCCATGTAATTTGTTTCCCTTCTAG	11.4472	1	1
OK213_E_056	Conotoxin precursor	I1	I1-2	OK213A_TRINITY_DN4982_c0_g1_i1_Frame_R3	MKLCVTFLLILVILPSLTGEKSSERTLSGAALRDKWGTCSLLGKGCRHHSDCCWDLCCTGKTCVMTVLPCHFFPL*	ATGAAGCTGTGTGTGACGTTTCTTCTTATTCTGGTGATTCTGCCATCACTGACTGGGGAGAAGTCTAGCGAGCGTACACTGAGTGGTGCTGCTCTGAGAGACAAATGGGGAACGTGCTCACTCTTAGGAAAAGGATGCAGACATCATTCCGACTGCTGTTGGGATTTGTGTTGTACCGGCAAAACGTGCGTTATGACTGTCCTTCCATGTCATTTCTTTCCCTTATAG	21.1333	1	1
OK213_E_057	Conotoxin precursor	I2	I2-1	OK213A_TRINITY_DN495_c0_g1_i13_Frame_F1	MFRVTSVSCFLLVIVLLNLAALTDACHLEGALCENDADCCLLECCLWRCASNCEKRGRRQALMALFGQR*	ATGTTTCGTGTGACGTCAGTCAGCTGTTTCCTGCTGGTCATTGTTCTTCTGAACTTGGCTGCGCTTACTGATGCCTGTCACCTTGAAGGAGCATTATGCGAAAATGATGCCGATTGCTGTCTCCTGGAATGCTGCCTTTGGCGTTGCGCATCAAATTGTGAAAAGAGGGGGCGACGCCAAGCTCTGATGGCATTATTTGGCCAACGTTGA	19.1146	1	1
OK213_E_058	Conotoxin precursor	I2	I2-1	OK213A_TRINITY_DN495_c0_g1_i1_Frame_F1	MFRVTSVSCFLLVIVLLNLAALTDACHPEGTPCTNDEQCCLMECCFWSCSSNCEKRGRRQALMALFGQR*	ATGTTTCGTGTGACGTCAGTCAGCTGTTTCCTGCTGGTCATTGTTCTTCTGAACTTGGCTGCGCTTACTGATGCCTGTCACCCTGAAGGAACACCATGCACAAATGATGAACAATGCTGTCTCATGGAATGCTGCTTTTGGTCTTGCTCATCAAATTGTGAAAAGAGGGGGCGACGCCAAGCTCTGATGGCATTATTTGGCCAACGTTGA	14.5929	1	1
OK213_E_059	Conotoxin precursor	I2	I2-1	OK213A_TRINITY_DN495_c0_g1_i9_Frame_F2	MMFRLTSVSCFLLVIVLLNLVVLTDACGAAGLPCPLHDPCCADMDCCGDVCLLNCEKRGRRQVPLKLFGQR*	ATGATGTTTCGATTGACGTCAGTCAGCTGTTTCCTGCTGGTCATTGTTCTTCTGAACTTGGTTGTGCTTACCGATGCCTGTGGCGCTGCAGGATTGCCATGCCCACTTCATGACCCTTGTTGTGCTGACATGGACTGCTGCGGAGATGTTTGCTTATTGAATTGTGAAAAGAGGGGGCGACGCCAAGTTCCGTTGAAATTATTTGGCCAACGTTGA	54680.7	1	1
OK213_E_060	Conotoxin precursor	I2	I2-1	OK213A_TRINITY_DN495_c0_g1_i18_Frame_F2	MMFRLTSVSCFLLVIVLLNLVVLTDACGAAGLPCPLHDPCCADMDCCGDVCLLNCEKRGRRQALMALFGQR*	ATGATGTTTCGATTGACGTCAGTCAGCTGTTTCCTGCTGGTCATTGTTCTTCTGAACTTGGTTGTGCTTACCGATGCCTGTGGCGCTGCAGGATTGCCATGCCCACTTCATGACCCTTGTTGTGCTGACATGGACTGCTGCGGAGATGTTTGCTTATTGAATTGTGAAAAGAGGGGGCGACGCCAAGCTCTGATGGCATTATTTGGCCAACGTTGA	23.8728	1	1
OK213_E_061	Conotoxin precursor	I2	I2-1	OK213A_TRINITY_DN22581_c0_g1_i1_Frame_R2	SVGCFLLVIVFLNLIVPTTTNDCIPEGSHCGVSSSCCKSTCCMETCQDPCRYTWKRAKLQELFRQR*	TCTGTCGGCTGTTTCTTACTGGTCATCGTTTTTCTGAACTTGATTGTGCCTACCACCACCAATGACTGCATTCCTGAAGGATCGCACTGCGGTGTTAGTAGCAGTTGCTGTAAATCTACTTGCTGTATGGAGACTTGCCAAGATCCGTGTCGATATACTTGGAAGAGGGCGAAACTCCAAGAATTATTTCGACAACGTTGA	0.733823	1	0
OK213_E_062	Conotoxin precursor	I2	I2-1	OK213A_TRINITY_DN495_c0_g2_i1_Frame_F2	MVRVTSVSCFLLVIVFLNLVVPTNACAGNEQSCNTREDCCEPLNCCNNACDFPCRIVGKRAKYREFFRQR*	ATGGTTCGTGTCACGTCTGTCAGCTGTTTCCTGCTGGTCATCGTTTTTTTGAACTTGGTTGTGCCTACCAATGCCTGCGCTGGTAACGAGCAGTCCTGCAACACACGTGAGGACTGCTGTGAACCTCTTAATTGCTGCAATAACGCTTGCGATTTCCCGTGTCGAATTGTTGGGAAGAGGGCGAAATACCGAGAATTCTTTCGACAACGTTGA	57.322	1	1
OK213_E_063	Conotoxin precursor	I2	I2-2	OK213A_TRINITY_DN7837_c1_g1_i1_Frame_F2	MMCRLTSLCCLLVIVFLNSAAGGIPCVGSGGVCSSHVWCCDSLDVCCELPGPSMCTPEGACESVGSALGRRAQYTRFFRR*	ATGATGTGTCGTTTAACGTCACTCTGCTGTTTGCTGGTCATCGTTTTCCTGAACTCGGCTGCGGGTGGCATTCCCTGTGTCGGGTCAGGAGGAGTATGTTCTTCGCATGTATGGTGCTGCGATTCGCTTGATGTCTGTTGTGAACTCCCTGGACCTTCGATGTGCACACCAGAAGGTGCGTGTGAATCTGTGGGAAGTGCTCTAGGACGCCGGGCACAATACACCCGTTTCTTCAGACGTTGA	23.2896	1	1
OK213_E_064	Conotoxin precursor	I3		OK213A_TRINITY_DN23195_c0_g1_i1_Frame_R2	LLPFHTGVETPGNHASRIATALRDRLLRPKRCYGSLHECENTDVCCTRYCCVKAGYCFNMCNNN*	CTTCTACCCTTTCACACCGGAGTGGAGACGCCGGGCAACCATGCCAGCCGGATTGCCACTGCACTGAGAGACAGGCTACTTCGTCCGAAACGGTGCTACGGATCTCTTCATGAATGCGAGAATACCGACGTGTGCTGTACACGTTACTGTTGTGTCAAGGCCGGTTACTGCTTCAACATGTGTAATAACAATTGA	1.62605	1	0
OK213_E_065	Conotoxin precursor	I3		OK213A_TRINITY_DN1553_c0_g2_i4_Frame_F2	MKLFWAIVVILMLLPLRTGVETSDNHASRSATALRDRLLRPKRCYGSLHECENTDECCTGYCCVKAGYCFNMCNNN*	ATGAAGCTGTTTTGGGCGATCGTTGTTATTCTGATGCTTCTACCCTTACGCACCGGAGTGGAGACGTCTGACAACCATGCAAGCCGGAGTGCCACTGCACTGAGAGACAGGCTTCTTCGTCCGAAACGGTGCTACGGATCTCTTCATGAATGCGAGAATACCGACGAGTGCTGTACAGGTTACTGTTGTGTCAAGGCCGGTTACTGCTTCAACATGTGTAATAACAATTGA	39788.8	1	1
OK213_E_066	Conotoxin precursor	I3		OK213A_TRINITY_DN1553_c0_g2_i1_Frame_F2	MKLFLAIVVILMLLSLSTGGETSDNHAIRNATALRDRLLGPKESKCQNAQGNCRDDSDCCGWLCCTGQSSGCAVTTMNCKEQPVQ*	ATGAAGCTGTTTTTGGCGATCGTTGTTATTCTGATGCTTCTATCCTTAAGCACCGGAGGGGAGACGTCTGACAACCATGCAATCCGGAATGCCACTGCACTGAGAGACAGGCTTCTTGGTCCAAAGGAATCGAAATGCCAAAATGCGCAAGGGAACTGTAGGGATGATAGCGATTGCTGTGGATGGCTGTGTTGTACCGGGCAGTCCAGTGGATGCGCTGTCACAACCATGAACTGCAAGGAACAACCTGTCCAATGA	2575.52	1	1
OK213_E_067	Conotoxin precursor	I4		OK213A_TRINITY_DN20633_c0_g1_i1_Frame_R3	MVLCSCDSDFGETCEEEKVCTCSHHGCCESTSSAKKDQCMTLAVCSAWVSKRRAIQKQKRFLGMVRGLAS*	ATGGTTTTGTGCTCGTGTGACTCCGACTTCGGTGAAACGTGTGAAGAGGAAAAGGTCTGCACATGTTCTCATCACGGGTGCTGTGAGTCAACTTCTTCGGCCAAAAAAGATCAGTGCATGACACTTGCGGTCTGCAGTGCGTGGGTTTCTAAACGCAGGGCAATCCAGAAGCAAAAAAGATTCCTTGGTATGGTGCGCGGTCTTGCCAGCTAG	0.636911	1	1
OK213_E_068	Conotoxin precursor	I4		OK213A_TRINITY_DN33144_c0_g1_i1_Frame_F1	MSGHTSVNFLLLSIVALGMVATVICSCDSEFSSEFCEQPEESCSCSTHTCCHWSRKDQCMKPQRCISAQKGNGRRRLIHMQK*	ATGTCCGGTCATACGTCAGTCAATTTTCTTCTGCTCTCCATCGTGGCTCTTGGCATGGTGGCGACGGTTATTTGCTCGTGTGACTCGGAATTCTCGAGTGAATTCTGTGAACAGCCGGAAGAAAGCTGCTCGTGCTCCACTCATACGTGCTGTCACTGGTCCAGAAAGGATCAGTGTATGAAACCGCAAAGGTGCATCTCTGCGCAAAAAGGAAATGGTCGCCGCAGATTGATTCATATGCAAAAATGA	1.11511	1	1
OK213_E_069	Conotoxin precursor	I4		OK213A_TRINITY_DN10433_c0_g1_i1_Frame_R3	EFCEQPEERICSCSTHVCCHLSSSKRDQCMTWNRCLSAQTGNRRSTHMQKRFLRMPRDLAD*	GAATTCTGTGAACAGCCGGAAGAAAGGATCTGCTCGTGCTCCACTCATGTGTGCTGTCATTTGAGTTCAAGCAAAAGGGATCAGTGTATGACATGGAATAGGTGCCTCTCTGCGCAAACAGGAAATCGCAGATCAACTCATATGCAAAAAAGATTCCTTCGTATGCCACGTGATCTTGCCGACTAG	0.890246	1	0
OK213_E_070	Conotoxin precursor	J	J-1	OK213A_TRINITY_DN3730_c0_g1_i1_Frame_R1	MASVQSVTGFCCLLWLMISVQLVTSGLTGTARLSKHLTARIPSEANMEILCPEWCNEGYDGYGCTCTKRQDVVSSPIRRRKRSMRV*	ATGGCGTCTGTTCAGTCTGTGACCGGCTTCTGCTGCCTGCTGTGGCTGATGATCTCTGTGCAGCTGGTCACTTCCGGCTTAACTGGAACTGCACGCCTGTCTAAGCATCTCACTGCTAGAATTCCTTCAGAGGCTAATATGGAAATCCTGTGCCCTGAATGGTGCAACGAGGGATACGACGGGTACGGCTGCACCTGCACCAAAAGACAGGACGTGGTTTCTTCACCGATAAGAAGGCGAAAAAGATCGATGAGGGTGTGA	5.85473	1	1
OK213_E_071	Conotoxin precursor	J	J-1	OK213A_TRINITY_DN1115_c1_g1_i1_Frame_R1	VQSVTCCCFLWLMLSVQLVTPSPPGTAHLPRDTRDVPEIVLELMCPMLCPNGFGGEYCTCTKKRDMVSSRISRKRSMAM*	GTTCAGTCTGTGACCTGCTGCTGTTTTCTGTGGCTGATGCTCTCTGTACAGCTCGTCACTCCTAGCCCCCCTGGAACTGCACATCTGCCTAGGGATACCAGAGATGTCCCAGAGATAGTTTTGGAATTAATGTGCCCTATGCTTTGCCCCAACGGCTTTGGAGGAGAGTATTGCACCTGCACAAAGAAACGGGACATGGTCTCTTCACGGATCAGCAGAAAAAGGTCCATGGCGATGTGA	10.0271	1	0
OK213_E_072	Conotoxin precursor	J	J-1	OK213A_TRINITY_DN1115_c1_g1_i2_Frame_R1	VQSVTCCCFLWLMLSVQLVTPSPPGTAHLPRDGTDRDIPNDDESAVCYFLCLMGINLDECNCPEKRDLVFTDQ*	GTTCAGTCTGTGACCTGCTGCTGTTTTCTGTGGCTGATGCTCTCTGTACAGCTCGTCACTCCTAGCCCCCCTGGAACTGCACATCTGCCTAGGGATGGCACTGATAGAGATATTCCAAATGATGATGAGAGCGCTGTATGCTATTTCCTTTGCTTGATGGGCATTAACTTAGATGAATGCAACTGCCCAGAGAAACGGGACCTGGTCTTCACTGATCAGTAG	7.22329	1	0
OK213_E_073	Conotoxin precursor	K		OK213A_TRINITY_DN837_c0_g2_i1_Frame_R2	MNMRMMLTLFVLVVMTTVSTSEHEAKKRHPCDVSVEGCLNWCKELPYLRHDKCCRFVDSIPDLSDGECEKLET*	ATGAACATGCGGATGATGCTCACATTGTTCGTGCTGGTTGTCATGACAACTGTCTCCACTTCAGAGCATGAAGCCAAGAAACGGCACCCTTGTGATGTGTCAGTGGAGGGTTGTTTAAACTGGTGTAAAGAGCTCCCTTACCTCCGTCACGACAAATGTTGTCGGTTCGTTGACAGCATACCTGATCTGTCGGATGGTGAATGTGAAAAACTGGAAACCTAA	23.3687	1	1
OK213_E_074	Conotoxin precursor	K		OK213A_TRINITY_DN25845_c0_g1_i1_Frame_F1	MIMRMTLTLFVLVVMTAASASGDALTEAKRIPYCGQTGAECYSWCIKQDLSKDWCCDFVKDIRMNPPADKCP*	ATGATCATGCGGATGACGCTCACATTGTTCGTACTGGTTGTCATGACAGCTGCCTCTGCTTCAGGGGATGCACTGACAGAAGCCAAGAGGATCCCTTACTGTGGACAGACAGGGGCAGAATGTTATTCTTGGTGTATAAAGCAGGACTTATCCAAAGACTGGTGTTGTGATTTCGTCAAGGATATTCGTATGAACCCGCCGGCTGACAAATGTCCGTAA	1.04421	1	1
OK213_E_075	Conotoxin precursor	L		OK213A_TRINITY_DN582_c0_g1_i1_Frame_R1	MKLLVTFIVVLMLATSLTYGFSLFSNNGERRAFEPRDPDAADQLVREERATRTCNPPCTGLAMCQSGTCGYVRFR*	ATGAAGCTGTTGGTGACGTTCATTGTTGTTCTGATGCTGGCTACGTCCTTGACCTATGGATTTAGCCTCTTCTCTAACAATGGGGAGAGGAGGGCCTTTGAGCCACGTGACCCCGATGCGGCGGATCAACTGGTTCGCGAGGAGCGGGCAACCCGCACTTGCAATCCGCCCTGCACTGGTTTAGCAATGTGCCAGAGTGGAACATGTGGCTACGTACGCTTCAGGTAG	97.7405	1	1
OK213_E_076	Conotoxin precursor	M	M-1	OK213A_TRINITY_DN150_c0_g1_i15_Frame_F1	MMSKLGVLLTICLLLFPITGLPLDEDQPADLPALRTQDFEPEHSPWFDPVRRCCSQNCLTCIPCCPY*	ATGATGTCTAAACTGGGGGTCTTGTTGACCATCTGTCTGCTTCTGTTTCCAATTACTGGGCTTCCGCTGGATGAAGATCAACCTGCTGATCTACCTGCATTGCGTACGCAGGACTTTGAACCTGAGCATAGTCCCTGGTTTGATCCCGTCAGACGGTGCTGCTCGCAGAATTGCTTGACGTGCATCCCTTGTTGCCCATACTGA	32.5655	1	1
OK213_E_077	Conotoxin precursor	M	M-1	OK213A_TRINITY_DN150_c0_g2_i2_Frame_F2	MMSKLGVLLTICLLLFPLTALPLDEDQPADLPAERMQDIATEQHPLFDPVKRCCAQPCYMGCIPCCF*	ATGATGTCCAAACTGGGAGTCTTGTTGACCATCTGTCTGCTTCTGTTTCCCCTTACTGCTCTTCCACTGGATGAAGATCAACCTGCAGACCTACCTGCAGAGCGTATGCAGGACATTGCAACTGAACAGCATCCCTTGTTTGATCCTGTCAAACGGTGTTGCGCGCAGCCATGCTACATGGGATGCATCCCTTGTTGCTTCTAA	66.7021	1	1
OK213_E_078	Conotoxin precursor	M	M-1	OK213A_TRINITY_DN150_c0_g1_i8_Frame_F2	MMSKLGVLLTICLLLFPLTALPLDEDQPADLPAERMQDIATEQHPMFDPVKRCCRKQSCTTCMPCCVD*	ATGATGTCCAAACTGGGAGTCTTGTTGACCATCTGTCTGCTTCTGTTTCCCCTTACTGCTCTTCCACTGGATGAAGATCAACCTGCAGACCTACCTGCAGAGCGTATGCAGGACATTGCAACTGAACAGCATCCCATGTTTGATCCTGTCAAACGGTGCTGCAGGAAGCAAAGCTGTACAACATGCATGCCGTGCTGCGTAGATTGA	184.629	1	1
OK213_E_079	Conotoxin precursor	M	M-2	OK213A_TRINITY_DN2401_c0_g1_i1_Frame_F3	MMSKLGVLLTICLLLFPLTAVPQDGDQPADRPAERMQDDISSEHHRFFDPVKRCCRLACGLGCHPCCG*	ATGATGTCTAAACTGGGAGTCTTGTTGACCATATGTCTACTTCTATTTCCCCTTACTGCTGTTCCGCAGGATGGAGATCAACCTGCAGACCGACCTGCAGAGCGTATGCAGGACGACATTTCATCTGAACATCATCGCTTTTTTGATCCCGTCAAACGGTGTTGCAGGTTAGCATGCGGCCTGGGATGCCACCCTTGTTGTGGATGA	5.6446	1	1
OK213_E_080	Conotoxin precursor	M	M-2	OK213A_TRINITY_DN2401_c0_g1_i8_Frame_F3	MMSKLGVLLTICLLLFPLTAVPQDGDQPADRPAERMQDDISSEHHRFFDPVKRCCAPSACRLGCRPCCRL*	ATGATGTCTAAACTGGGAGTCTTGTTGACCATCTGTCTGCTTCTGTTTCCCCTTACTGCTGTTCCGCAGGATGGAGATCAACCTGCAGACCGACCTGCAGAGCGTATGCAGGACGACATTTCATCTGAACATCATCGCTTTTTTGATCCCGTCAAACGGTGTTGCGCCCCGTCAGCATGCCGCCTCGGATGCAGGCCTTGTTGTAGGTTGTAG	3.87413	1	1
OK213_E_081	Conotoxin precursor	M	M-2	OK213A_TRINITY_DN2401_c0_g1_i2_Frame_F1	MSKLGVLLTICLLLFPLTAVPQDGDQPADRPAERMQDDISSEHHRRFGSGKRCCNASACIVGCRPCCL*	ATGTCTAAACTGGGAGTCTTGTTGACCATCTGTCTGCTTCTGTTTCCCCTTACTGCTGTTCCGCAGGATGGAGATCAACCTGCAGACCGACCTGCAGAGCGTATGCAGGACGACATTTCATCTGAACATCATCGCCGTTTTGGTTCCGGCAAAAGGTGTTGCAACGCGTCAGCATGCATCGTCGGATGCAGGCCTTGTTGTTTATGA	0	1	1
OK213_E_082	Conotoxin precursor	M	M-2	OK213A_TRINITY_DN2401_c0_g1_i9_Frame_F3	MMSKLRILLTICLLLFPLTAVPQDGDQPADRPAERMQDDISSEHHRRFGSGKRCCNASACIVGCRPCCL*	ATGATGTCTAAACTGAGAATCTTGTTGACCATCTGTCTACTTCTATTTCCCCTTACTGCTGTTCCGCAGGATGGAGATCAACCTGCAGACCGACCTGCAGAGCGTATGCAGGACGACATTTCATCTGAACATCATCGCCGTTTTGGTTCCGGCAAAAGGTGTTGCAACGCGTCAGCATGCATCGTCGGATGCAGGCCTTGTTGTTTATGA	3.48256	1	1
OK213_E_083	Conotoxin precursor	M	M-2	OK213A_TRINITY_DN2401_c0_g1_i5_Frame_F3	MMSKLGVLLTICLLLFPLTAVPQDGDQPADRPAERMQDDISSERHPMFDAVRDCCPLPACPFGCEPCCG*	ATGATGTCTAAACTGGGAGTCTTGTTGACCATCTGTCTGCTTCTGTTTCCCCTTACTGCTGTTCCGCAGGATGGAGATCAACCTGCAGACCGACCTGCAGAGCGTATGCAGGACGACATTTCATCTGAACGTCATCCCATGTTTGATGCCGTCAGAGATTGTTGCCCGTTGCCGGCATGCCCCTTTGGATGCGAGCCTTGTTGTGGATGA	3.78965	1	1
OK213_E_084	Conotoxin precursor	M	M-2	OK213A_TRINITY_DN2401_c0_g1_i6_Frame_F1	GVLLTICLLLFPLTAVPQDGDQPADRPAERMQDDISSERHPMFDAVRDCCPLPACPFGCNPCCG*	GGAGTCTTGTTGACCATCTGTCTGCTTCTGTTTCCCCTTACTGCTGTTCCGCAGGATGGAGATCAACCTGCAGACCGACCTGCAGAGCGTATGCAGGACGACATTTCATCTGAACGTCATCCCATGTTTGATGCCGTCAGAGATTGTTGCCCGTTGCCGGCATGCCCCTTTGGATGCAACCCTTGTTGTGGATGA	2.10228	1	0
OK213_E_085	Conotoxin precursor	M	M-3a	OK213A_TRINITY_DN712_c1_g2_i1_Frame_F1	LATLQLDADQPVKRYAKNKQDLNADKRMRLILPALRQRQCCAWEWCDHVCGCCE*	CTGGCAACGCTCCAGCTGGATGCAGATCAACCTGTAAAACGATATGCGAAGAACAAACAGGACCTCAACGCAGATAAAAGGATGAGATTGATATTGCCTGCTCTGAGGCAGCGGCAATGCTGTGCTTGGGAATGGTGCGACCATGTTTGTGGTTGCTGCGAGTAG	7.10277	1	0
OK213_E_086	Conotoxin precursor	M	M-3a	OK213A_TRINITY_DN525_c7_g1_i1_Frame_F3	MMLKLRVVLFTLLVLVPMATLKLDADQPVERYAENKQDLNPDERTGFIRPALRGCCPSSACDFKSGCTCCG*	ATGATGTTGAAACTGAGAGTGGTACTATTCACCTTGCTGGTCCTGGTTCCCATGGCAACGCTCAAACTGGATGCAGATCAACCTGTAGAACGATATGCGGAGAACAAACAGGACCTCAACCCAGATGAAAGGACAGGATTCATACGGCCTGCTCTGAGGGGATGCTGCCCTTCATCTGCATGCGATTTCAAGTCAGGGTGTACATGCTGCGGTTAG	226.165	1	1
OK213_E_087	Conotoxin precursor	M	M-3a	OK213A_TRINITY_DN712_c1_g1_i3_Frame_F3	LQLDADQPVERYAENKQDLNPDGRREFILPAVGRTCCDLTWCNGNCRCCTPR*	CTCCAACTGGATGCAGATCAACCTGTAGAACGATATGCGGAGAACAAACAGGACCTCAACCCAGATGGAAGAAGGGAATTCATATTGCCTGCTGTGGGGAGAACATGCTGTGATCTTACATGGTGCAACGGAAATTGTCGTTGCTGCACCCCAAGATAG	306.816	1	0
OK213_E_088	Conotoxin precursor	M	M-3a	OK213A_TRINITY_DN712_c1_g1_i2_Frame_F3	MMLKMGVVLFVFLVLFPLATLQLNADQHVKRYAENKQDLNPDERRGFKLSALRGCCPSSVCDLRSGCTCCA*	ATGATGCTGAAAATGGGAGTGGTGCTATTCGTCTTTCTGGTCCTGTTTCCCCTGGCAACGCTCCAACTGAATGCAGATCAACATGTAAAACGATATGCGGAGAACAAACAGGACCTCAACCCAGATGAAAGGAGGGGATTCAAATTGTCTGCTCTGAGGGGATGCTGCCCTTCATCTGTATGCGATCTCAGGTCAGGGTGTACATGCTGCGCTTAG	180.371	1	1
OK213_E_089	Conotoxin precursor	M	M-3a	OK213A_TRINITY_DN182_c1_g1_i21_Frame_R3	MMLKMGVVLFVFLVLFPLSTLQLDADQPVERNAENKQDLNPDERKGLVSLDLRLPCCDVGWCSRRCNCDVYRP*	ATGATGCTGAAAATGGGAGTGGTGCTATTCGTCTTTCTGGTCCTGTTTCCCCTGTCAACGCTCCAACTAGATGCAGATCAACCTGTAGAACGAAATGCGGAGAACAAACAGGACCTCAACCCAGATGAAAGGAAGGGATTGGTATCGCTTGATCTGAGGCTACCATGCTGTGATGTTGGATGGTGCAGCAGGCGTTGTAATTGCGACGTCTATAGACCCTGA	3104.49	1	1
OK213_E_090	Conotoxin precursor	M	M-3a	OK213A_TRINITY_DN182_c1_g1_i12_Frame_R3	MMLKLSVVLFVFLVLFPLATLQLDADQPVERNAENKQDLNPDERKGLVSLDLRLPCCDVGWCSRRCNCDVYRP*	ATGATGTTGAAACTGAGCGTGGTACTATTCGTCTTCCTGGTCCTGTTTCCCCTGGCAACGCTCCAACTGGATGCAGATCAACCTGTAGAACGAAATGCGGAGAACAAACAGGACCTCAACCCAGATGAAAGGAAGGGATTGGTATCGCTTGATCTGAGGCTACCATGCTGTGATGTTGGATGGTGCAGCAGGCGTTGTAATTGCGACGTCTATAGACCCTGA	0.977571	1	1
OK213_E_091	Conotoxin precursor	M	M-3a	OK213A_TRINITY_DN182_c1_g1_i36_Frame_R3	MMLKMRAVLFTFLVLFPLATLQLDADQPVERDAENKQDNPDERKGLVSLDLRLPCCDVGWCSRRCNCDVYRP*	ATGATGCTGAAAATGAGAGCAGTGCTATTCACCTTTCTGGTCCTGTTTCCCCTGGCAACGCTCCAACTGGATGCAGATCAACCTGTAGAACGAGATGCGGAGAACAAACAGGACAACCCAGATGAAAGGAAGGGATTGGTATCGCTTGATCTGAGGCTACCATGCTGTGATGTTGGATGGTGCAGCAGGCGTTGTAATTGCGACGTCTATAGACCCTGA	1342.58	1	1
OK213_E_092	Conotoxin precursor	M	M-3a	OK213A_TRINITY_DN712_c1_g1_i8_Frame_F3	MMLKMGVVLFVFLVLFPLATLQLNADQHVKRYAENKQDLNPDERTGFILSAQKQKRCCTF	ATGATGCTGAAAATGGGAGTGGTGCTATTCGTCTTTCTGGTCCTGTTTCCCCTGGCAACGCTCCAACTGAATGCAGATCAACATGTAAAACGATATGCGGAGAACAAACAGGACCTCAACCCAGATGAAAGGACGGGATTCATATTGTCTGCTCAAAAGCAGAAGCGATGCTGTACATTC	21060.5	0	0
OK213_E_093	Conotoxin precursor	M	M-3a	OK213A_TRINITY_DN182_c1_g1_i46_Frame_R3	MMLKMGVVLFVFLVLFPLSTLQLDADQPVERDAENKQDNPDERKGFVSLALRRPCCSLRWCSNYCRCGI*	ATGATGCTGAAAATGGGAGTGGTGCTATTCGTCTTTCTGGTCCTGTTTCCCCTGTCAACGCTCCAACTAGATGCAGATCAACCTGTAGAACGAGATGCGGAGAACAAACAGGACAACCCAGATGAAAGGAAGGGATTCGTATCGCTTGCTCTGAGGCGACCATGCTGTAGTCTTCGATGGTGCAGCAACTATTGTCGTTGCGGCATCTAA	853.952	1	1
OK213_E_094	Conotoxin precursor	M	M-3a	OK213A_TRINITY_DN182_c1_g1_i13_Frame_R3	MMLKLSVVLFVFLVLFPLATLQLDADQPVERDAENKQDNPDERKGFVSLALRRPCCSLRWCSNYCRCGI*	ATGATGTTGAAACTGAGCGTGGTACTATTCGTCTTCCTGGTCCTGTTTCCCCTGGCAACGCTCCAACTGGATGCAGATCAACCTGTAGAACGAGATGCGGAGAACAAACAGGACAACCCAGATGAAAGGAAGGGATTCGTATCGCTTGCTCTGAGGCGACCATGCTGTAGTCTTCGATGGTGCAGCAACTATTGTCGTTGCGGCATCTAA	7808.01	1	1
OK213_E_095	Conotoxin precursor	M	M-3a	OK213A_TRINITY_DN712_c1_g1_i1_Frame_F3	LQLDADQPVERYAENKQDLNPDERRGFKLSALRGCCPSSVCDLRSGCTCCA*	CTCCAACTGGATGCAGATCAACCTGTAGAACGATATGCGGAGAACAAACAGGACCTCAACCCAGATGAAAGGAGGGGATTCAAATTGTCTGCTCTGAGGGGATGCTGCCCTTCATCTGTATGCGATCTCAGGTCAGGGTGTACATGCTGCGCTTAG	35.0376	1	0
OK213_E_096	Conotoxin precursor	M	M-3a	OK213A_TRINITY_DN712_c1_g1_i4_Frame_F3	MMLKMGVVLFVFLVLFPLATLQLNADQHVKRYAENKQDLNPDEWRGFILPALQKRCCKAPWCRTPCACCE*	ATGATGCTGAAAATGGGAGTGGTGCTATTCGTCTTTCTGGTCCTGTTTCCCCTGGCAACGCTCCAACTGAATGCAGATCAACATGTAAAACGATATGCGGAGAACAAACAGGACCTCAACCCAGATGAATGGAGAGGATTCATATTGCCTGCTCTGCAGAAGCGATGCTGTAAAGCGCCATGGTGCCGTACACCTTGTGCTTGCTGCGAGTAG	50.8286	1	1
OK213_E_097	Conotoxin precursor	M	M-3a	OK213A_TRINITY_DN10012_c1_g1_i1_Frame_F1	MLKMGVVLFIFLVLFPLATLQLDADKPVERYAENKQLLNPDERRGIIL	ATGTTGAAAATGGGAGTGGTGCTATTCATCTTTCTGGTCCTGTTTCCCCTGGCAACACTGCAGCTGGATGCAGATAAACCTGTAGAACGATATGCGGAGAACAAACAGCTCCTCAACCCAGATGAAAGAAGGGGAATCATATTG	47.5306	0	0
OK213_E_098	Conotoxin precursor	M	M-3a	OK213A_TRINITY_DN10012_c1_g1_i2_Frame_F1	MLKMGVVLFIFLVLFPLATLQLDADQPVERYAKNKQLFNPHKRRGIILRAPGKRCCHWNWCDHLCSCCGS*	ATGTTGAAAATGGGAGTGGTGCTATTCATCTTTCTGGTCCTGTTTCCCCTGGCAACACTGCAGCTGGATGCAGATCAACCTGTAGAACGATATGCGAAGAACAAACAGCTCTTCAACCCACATAAAAGGAGGGGAATCATATTGCGTGCTCCGGGGAAGCGATGCTGTCATTGGAATTGGTGCGACCATCTTTGTTCATGCTGCGGCAGTTAG	13.3216	1	1
OK213_E_099	Conotoxin precursor	M	M-3a	OK213A_TRINITY_DN182_c1_g1_i48_Frame_R1	MMLKLRVVLFILLVLFPLTTLQLDADQPVERYAENKQDLHPNERTGFILPAMRRRCCSLRRCEPHCHCCVQRH*	ATGATGTTGAAACTGAGAGTGGTACTATTCATCTTGCTGGTCCTGTTTCCCCTGACAACGCTCCAACTGGATGCAGATCAACCTGTAGAACGATATGCGGAGAACAAACAGGACCTCCACCCAAATGAAAGGACGGGATTCATATTGCCTGCTATGAGGCGACGATGCTGTAGTCTTCGACGGTGCGAACCGCATTGTCATTGCTGCGTCCAAAGACACTGA	6584.18	1	1
OK213_E_100	Conotoxin precursor	M	M-3a	OK213A_TRINITY_DN182_c1_g1_i51_Frame_R3	MMLKMGVVLFVFLVLFPLSTLQLDADQPVERYAENKQDLHPNERTGFILPAMRRRCCSLRRCEPHCHCCVQRH*	ATGATGCTGAAAATGGGAGTGGTGCTATTCGTCTTTCTGGTCCTGTTTCCCCTGTCAACGCTCCAACTAGATGCAGATCAACCTGTAGAACGATATGCGGAGAACAAACAGGACCTCCACCCAAATGAAAGGACGGGATTCATATTGCCTGCTATGAGGCGACGATGCTGTAGTCTTCGACGGTGCGAACCGCATTGTCATTGCTGCGTCCAAAGACACTGA	975.851	1	1
OK213_E_101	Conotoxin precursor	M	M-3a	OK213A_TRINITY_DN182_c7_g1_i1_Frame_R3	MMLKMGEVLFVFLVLFPLATLQLNADQHVKRYAENKQALHPNERKGFILPAMSRRCCSLRRGEPHCHCCGQRH*	ATGATGCTGAAAATGGGAGAGGTGCTATTCGTCTTTCTGGTCCTTTTTCCCCTGGCAACGCTCCAACTGAATGCAGATCAACATGTAAAACGATATGCGGAGAACAAACAGGCCCTCCACCCAAATGAAAGGAAGGGATTCATATTGCCTGCTATGAGTCGACGATGCTGTAGTCTTCGACGGGGCGAACCGCATTGTCATTGCTGCGGCCAAAGACACTGA	7.21604	1	1
OK213_E_102	Conotoxin precursor	M	M-3a	OK213A_TRINITY_DN1947_c0_g1_i4_Frame_F3	MMLKMGVVLFVFLVLSPLATLQLDADQPVEREAENKQDLHSDERTGFILPAQK	ATGATGCTGAAAATGGGAGTGGTGCTATTCGTCTTTCTGGTCTTGTCTCCCCTGGCAACGCTCCAACTGGATGCAGATCAACCTGTAGAACGAGAAGCGGAGAACAAACAGGACCTCCACTCAGATGAAAGGACGGGATTCATATTGCCTGCTCAAAAG	19.1142	0	0
OK213_E_103	Conotoxin precursor	M	M-3a	OK213A_TRINITY_DN1447_c3_g1_i3_Frame_F2	MMLKMGVVLFTFLALLPLATLQLDADQPVERYAENKRELNPDEMKAFILPVLRKQCCEGKCSQSQCFCCQ*	ATGATGCTGAAAATGGGAGTGGTGCTATTCACCTTTCTGGCCCTGTTGCCCCTGGCAACGCTGCAACTGGATGCAGATCAACCTGTAGAACGATACGCGGAGAACAAACGGGAACTCAACCCAGATGAAATGAAGGCATTCATATTGCCTGTTCTGAGGAAACAATGCTGTGAGGGTAAGTGCTCCCAGAGTCAGTGCTTTTGCTGCCAGTAG	10.7661	1	1
OK213_E_104	Conotoxin precursor	M	M-3a	OK213A_TRINITY_DN3723_c2_g1_i1_Frame_R1	MMLKLRVVLFIFLVLFPLATLQLDAGQPVARYAKNKQDLNPNKRRRFILRAMRQKCCEWKVCEVQCGCCY*	ATGATGTTGAAACTGAGAGTGGTACTATTCATCTTCCTGGTCCTGTTTCCCCTGGCAACGCTCCAACTGGATGCAGGTCAGCCTGTGGCACGATATGCGAAGAACAAACAGGACCTCAACCCAAATAAAAGGAGGAGATTCATATTGCGTGCTATGAGGCAGAAATGCTGTGAGTGGAAAGTGTGCGAAGTTCAGTGTGGTTGCTGCTATTAG	1953.64	1	1
OK213_E_105	Conotoxin precursor	M	M-3a	OK213A_TRINITY_DN206_c1_g1_i1_Frame_R2	QPVERYVENKQDLNPDERTGFILPAQKQKRCCKYPLCAAGCSCCKT*	CAACCTGTAGAACGATATGTGGAGAACAAACAGGACCTCAACCCAGATGAAAGGACGGGATTCATATTGCCTGCTCAAAAGCAGAAGAGATGCTGTAAATACCCACTTTGCGCTGCAGGTTGTTCTTGCTGCAAGACCTAG	421.701	1	0
OK213_E_106	Conotoxin precursor	M	M-3a	OK213A_TRINITY_DN1447_c3_g1_i1_Frame_F2	MMLKMGVVLFTFLALLPLATLQLDADQPVERDAENKQDLNADERMTLLLEDGCCTRPRCTGACSCCQD*	ATGATGCTGAAAATGGGAGTGGTGCTATTCACCTTTCTGGCCCTGTTGCCCCTGGCAACGCTGCAACTGGATGCAGATCAACCTGTAGAACGAGATGCGGAGAACAAACAGGACCTCAACGCAGATGAAAGGATGACATTACTATTGGAAGATGGATGCTGTACACGCCCACGTTGCACTGGAGCTTGTTCTTGCTGCCAGGACTAG	13.9801	1	1
OK213_E_107	Conotoxin precursor	M	M-3a	OK213A_TRINITY_DN1447_c3_g1_i2_Frame_F2	MMLKMGVVLFTFLALLPLATLQLDADQPVERDAENKQDLNADERMTLLLYALGEDGCCTRPRCTGACSCCQD*	ATGATGCTGAAAATGGGAGTGGTGCTATTCACCTTTCTGGCCCTGTTGCCCCTGGCAACGCTGCAACTGGATGCAGATCAACCTGTAGAACGAGATGCGGAGAACAAACAGGACCTCAACGCAGATGAAAGGATGACATTACTATTGTATGCTCTGGGGGAAGATGGATGCTGTACACGCCCACGTTGCACTGGAGCTTGTTCTTGCTGCCAGGACTAG	2.9252	1	1
OK213_E_108	Conotoxin precursor	M	M-3a	OK213A_TRINITY_DN10607_c0_g1_i1_Frame_F1	TLQLDADQPVERYAENKQLLNPDERSGILLPALKKFCCDSDWCHLPECLCCNR*	ACGCTCCAGCTGGATGCAGATCAACCTGTAGAACGATATGCGGAGAACAAACAGCTCCTCAACCCAGATGAAAGGAGTGGAATCCTATTGCCTGCTCTGAAGAAGTTCTGCTGTGATTCGGATTGGTGCCACCTTCCGGAATGTCTTTGCTGCAACCGTTAG	4.16979	1	0
OK213_E_109	Conotoxin precursor	M	M-3a	OK213A_TRINITY_DN3723_c1_g1_i2_Frame_F2	FPLATFQLDADQPVERHAENKQLLNPDERRRIISDALGQRICCPQGGCHQLCQCCGC*	TTCCCCCTGGCAACGTTCCAACTCGATGCAGATCAACCTGTAGAACGACATGCGGAGAACAAACAGCTCCTCAACCCAGATGAAAGGAGGAGAATCATATCGGATGCTCTGGGGCAGCGAATATGCTGTCCTCAGGGAGGCTGCCACCAACTTTGTCAATGCTGCGGCTGTTAG	2.38852	1	0
OK213_E_110	Conotoxin precursor	M	M-3a	OK213A_TRINITY_DN3723_c1_g1_i1_Frame_F2	FPLATFQLDADQPVERHAENKQLLNPDERRGIILHALGQRVCCSFGSCDSLCQCCDG*	TTCCCCCTGGCAACGTTCCAACTCGATGCAGATCAACCTGTAGAACGACATGCGGAGAACAAACAGCTCCTCAACCCAGATGAAAGAAGGGGAATCATATTGCATGCTCTGGGGCAGCGAGTATGCTGTTCTTTCGGAAGCTGCGATAGCCTTTGTCAATGCTGCGACGGTTAG	3.88134	1	0
OK213_E_111	Conotoxin precursor	M	M-3a	OK213A_TRINITY_DN4482_c1_g1_i1_Frame_F1	MMLKMRAVLFTFLVLLPLVTFQLDADQPRKQYAGNKRALNPGERKKTKLHALRQRCCIGPECPEECYCCV*	ATGATGCTGAAAATGAGAGCAGTGCTATTCACCTTTCTGGTCCTGTTACCCTTGGTAACGTTCCAGCTGGATGCAGATCAACCTAGAAAACAGTATGCGGGGAACAAACGGGCCCTCAACCCAGGAGAAAGGAAGAAAACAAAATTGCACGCTCTAAGGCAGCGATGCTGTATTGGGCCAGAATGCCCTGAAGAATGTTATTGCTGCGTGTAG	28.2807	1	1
OK213_E_112	Conotoxin precursor	M	M-3a	OK213A_TRINITY_DN150_c0_g2_i3_Frame_F1	MMLKLRVVLFVFLVLFPLATLHLDADQPADRPARMQDIATEQHPLFDPVKRCCAQPCYMGCIPCCF*	ATGATGTTGAAACTGAGAGTGGTACTATTCGTCTTCCTGGTCCTGTTTCCCCTGGCAACGCTCCACCTGGATGCAGATCAACCTGCAGACCGACCTGCGCGTATGCAGGACATTGCAACTGAACAGCATCCCTTGTTTGATCCTGTCAAACGGTGTTGCGCGCAGCCATGCTACATGGGATGCATCCCTTGTTGCTTCTAA	1061.04	1	1
OK213_E_113	Conotoxin precursor	M	M-3a	OK213A_TRINITY_DN182_c2_g1_i4_Frame_F2	MMLKLSLVLFILLVPFPLTTLQLDADQPADRPARKKDIATKRHPLFDPVKRCCEWPCAGCIPCCFR*	ATGATGTTGAAACTGAGCTTGGTACTATTCATCTTGCTGGTCCCGTTTCCCCTGACAACGCTCCAACTCGATGCAGATCAACCTGCAGACCGACCTGCGCGTAAAAAGGACATTGCAACTAAACGGCATCCCTTGTTTGATCCTGTCAAACGGTGTTGCGAATGGCCATGCGCAGGATGCATCCCTTGTTGCTTTCGTTAA	4.04486	1	1
OK213_E_114	Conotoxin precursor	M	M-3a	OK213A_TRINITY_DN182_c2_g1_i3_Frame_F2	MMLKLSLVLFILLVPFPLTTLQLDADQPADRPARKKDIATKRHPLSDPDRGCCGWSCTPCFP*	ATGATGTTGAAACTGAGCTTGGTACTATTCATCTTGCTGGTCCCGTTTCCCCTGACAACGCTCCAACTCGATGCAGATCAACCTGCAGACCGACCTGCGCGTAAAAAGGACATTGCAACTAAACGGCATCCCTTGTCTGATCCTGACAGAGGGTGTTGCGGTTGGTCATGCACACCATGCTTCCCTTGA	276.223	1	1
OK213_E_115	Conotoxin precursor	M	M-3a	OK213A_TRINITY_DN182_c2_g1_i1_Frame_F2	MMLKLSLVLFILLVPFPLTTLQLDADQPADRPARKKDIATKRHPLSDPDGRCCCWRCTRSLH*	ATGATGTTGAAACTGAGCTTGGTACTATTCATCTTGCTGGTCCCGTTTCCCCTGACAACGCTCCAACTCGATGCAGATCAACCTGCAGACCGACCTGCGCGTAAAAAGGACATTGCAACTAAACGGCATCCGTTGTCTGATCCTGACGGACGGTGTTGCTGTTGGCGATGCACACGATCCCTCCATTGA	738.315	1	1
OK213_E_116	Conotoxin precursor	M	M-3a	OK213A_TRINITY_DN182_c2_g1_i5_Frame_F2	MMLKLSLVLFILLVPFPLTTLQLDADQPADRPARMQDIATEQHPLFDSLRGCCSGACLPCRR*	ATGATGTTGAAACTGAGCTTGGTACTATTCATCTTGCTGGTCCCGTTTCCCCTGACAACGCTCCAACTCGATGCAGATCAACCTGCAGACCGACCTGCGCGTATGCAGGACATTGCAACTGAACAGCATCCCTTGTTTGATTCTCTCAGAGGGTGTTGCAGTGGGGCATGCCTACCATGCCGCCGTTGA	1070.35	1	1
OK213_E_117	Conotoxin precursor	M	M-3a-WF	OK213A_TRINITY_DN182_c1_g1_i11_Frame_F1	DADQPVERYVENKENLNPDERREIILPALRVQSLLDCIGYAGSCE*	GATGCAGATCAACCTGTAGAACGATATGTGGAGAACAAAGAGAACCTCAACCCAGATGAAAGGAGGGAAATCATATTGCCTGCTCTGAGGGTTCAGAGTTTACTTGACTGCATTGGGTATGCAGGTTCGTGTGAATAG	18533	1	0
OK213_E_118	Conotoxin precursor	M	M-3a-WF	OK213A_TRINITY_DN24609_c0_g1_i1_Frame_R1	MMLNLRVVLVILLVLFPLTTLQLDADQPVERYVVNKENLNPDERREVILPALRVQSFIACTMGWCK*	ATGATGTTGAACCTGAGAGTGGTACTAGTCATCTTGCTGGTCCTGTTTCCGCTGACAACGCTCCAACTGGATGCAGATCAACCTGTAGAACGATATGTGGTGAACAAAGAGAACCTCAACCCAGATGAAAGGAGGGAAGTCATATTGCCTGCTCTGAGGGTTCAGAGTTTCATTGCCTGCACTATGGGTTGGTGTAAATAG	1.65158	1	1
OK213_E_119	Conotoxin precursor	M	M-3a-WF	OK213A_TRINITY_DN182_c1_g1_i57_Frame_R3	MMLKMRAVLFTFLVLFPLATLQLDADQPVERNAENKQDLNPDKRREIILPALRLQARRSCSFPSNTWCK*	ATGATGCTGAAAATGAGAGCAGTGCTATTCACCTTTCTGGTCCTGTTTCCCCTGGCAACGCTCCAACTGGATGCAGATCAACCTGTAGAACGAAATGCGGAGAACAAACAGGACCTCAACCCAGATAAAAGGAGGGAAATCATATTGCCTGCTCTGAGGCTTCAGGCTCGACGTTCCTGTAGTTTTCCTTCGAACACTTGGTGTAAATAG	29103.3	1	1
OK213_E_120	Conotoxin precursor	M	M-3a-WF	OK213A_TRINITY_DN182_c1_g1_i28_Frame_R1	MMLKMRAVLFTFLVLFPLATLQLDADQPVERYVENKENLNPDERREIILPALRLQARRSCSFPSNTWCK*	ATGATGCTGAAAATGAGAGCAGTGCTATTCACCTTTCTGGTCCTGTTTCCCCTGGCAACGCTCCAACTGGATGCAGATCAACCTGTAGAACGATATGTGGAGAACAAAGAGAACCTCAACCCAGATGAAAGGAGGGAAATCATATTGCCTGCTCTGAGGCTTCAGGCTCGACGTTCCTGTAGTTTTCCTTCGAACACTTGGTGTAAATAG	3.91311	1	1
OK213_E_121	Conotoxin precursor	M	M-3a-WF	OK213A_TRINITY_DN182_c1_g1_i1_Frame_R1	MMLKLRVVLFILLVLFPLTTLQLDADQPVERYVENKENLNPDERREIILPALRLQARRSCSFPSNTWCK*	ATGATGTTGAAACTGAGAGTGGTACTATTCATCTTGCTGGTCCTGTTTCCCCTGACAACGCTCCAACTGGATGCAGATCAACCTGTAGAACGATATGTGGAGAACAAAGAGAACCTCAACCCAGATGAAAGGAGGGAAATCATATTGCCTGCTCTGAGGCTTCAGGCTCGACGTTCCTGTAGTTTTCCTTCGAACACTTGGTGTAAATAG	21855.9	1	1
OK213_E_122	Conotoxin precursor	M	M-3a-WF	OK213A_TRINITY_DN3723_c0_g1_i1_Frame_F3	MMQKMRAVLFTFLVLFPLATFQLDADQPVERNAENKQDLNPDKRREIILPALRLHARRSCSFPSN	ATGATGCAGAAAATGAGAGCAGTGCTATTCACCTTTCTGGTCCTGTTCCCCCTGGCAACGTTCCAACTGGATGCAGATCAACCTGTAGAACGAAATGCGGAGAACAAACAGGACCTCAACCCAGATAAAAGGAGGGAAATCATATTGCCTGCTCTGAGGCTTCATGCTCGACGTTCCTGTAGTTTTCCTTCGAAC	13240.3	0	0
OK213_E_123	Conotoxin precursor	M	M-3a-WF	OK213A_TRINITY_DN10012_c2_g1_i1_Frame_F3	MMLKMRALLFTSLVLFPLATEQLNADQQVKRYAENKQVLNPDKRREIILPTLRLQARRSCSFPSNTWCK*	ATGATGCTGAAAATGAGAGCACTGCTATTCACCTCTCTGGTCCTGTTTCCCCTGGCAACGGAACAACTGAATGCAGATCAACAAGTAAAACGATATGCGGAGAACAAACAGGTCCTCAACCCAGATAAAAGGAGGGAAATCATATTGCCTACTCTGAGGCTTCAGGCTCGTCGTTCCTGTAGTTTTCCTTCGAACACTTGGTGTAAATAG	17.0291	1	1
OK213_E_124	Conotoxin precursor	M	M-3a-WF	OK213A_TRINITY_DN182_c1_g1_i63_Frame_R3	MMLKMGVVLFVFLVLFPLSTLQLDADQPVERNAENKQDLNPDGRRGIILSALRSPNSCVWSPPCHLPSERMTAFTANNAALELPYSGLVAPEQ*	ATGATGCTGAAAATGGGAGTGGTGCTATTCGTCTTTCTGGTCCTGTTTCCCCTGTCAACGCTCCAACTAGATGCAGATCAACCTGTAGAACGAAATGCGGAGAACAAACAGGACCTCAACCCAGATGGAAGGAGGGGAATCATATTGTCTGCTCTGAGATCTCCGAATTCATGTGTCTGGAGTCCTCCGTGTCATCTTCCATCGGAACGAATGACTGCTTTTACAGCCAACAATGCCGCACTCGAATTACCCTACAGTGGTTTGGTTGCTCCAGAACAATGA	0.609877	1	1
OK213_E_125	Conotoxin precursor	M	M-3a-WF	OK213A_TRINITY_DN182_c1_g1_i50_Frame_R3	MMLKLSVVLFVFLVLFPLATLQLDADQPVERNAENKQDLNPDGRRGIILSALRSPNSCVWSPPCHLPSERMTAFTANNAALELPYSGLVAPEQ*	ATGATGTTGAAACTGAGCGTGGTACTATTCGTCTTCCTGGTCCTGTTTCCCCTGGCAACGCTCCAACTGGATGCAGATCAACCTGTAGAACGAAATGCGGAGAACAAACAGGACCTCAACCCAGATGGAAGGAGGGGAATCATATTGTCTGCTCTGAGATCTCCGAATTCATGTGTCTGGAGTCCTCCGTGTCATCTTCCATCGGAACGAATGACTGCTTTTACAGCCAACAATGCCGCACTCGAATTACCCTACAGTGGTTTGGTTGCTCCAGAACAATGA	0	1	1
OK213_E_126	Conotoxin precursor	M	M-3a-WF	OK213A_TRINITY_DN182_c1_g1_i43_Frame_R3	MMLKLSVVLFVFLVLFPLATLQLDADQPADRDAENKQDLNPDGRRGIILSALRSPNSCVWSPPCHLPSERMTAFTANNAALELPYSGLVAPEQ*	ATGATGTTGAAACTGAGCGTGGTACTATTCGTCTTCCTGGTCCTGTTTCCCCTGGCAACGCTCCAGCTGGATGCAGATCAACCTGCAGACCGAGATGCAGAGAACAAACAGGACCTCAACCCAGATGGAAGGAGGGGAATCATATTGTCTGCTCTGAGATCTCCGAATTCATGTGTCTGGAGTCCTCCGTGTCATCTTCCATCGGAACGAATGACTGCTTTTACAGCCAACAATGCCGCACTCGAATTACCCTACAGTGGTTTGGTTGCTCCAGAACAATGA	3.41699	1	1
OK213_E_127	Conotoxin precursor	M	M-3a-WF	OK213A_TRINITY_DN182_c1_g1_i9_Frame_R3	MMLKMRAVLFTFLVLFPLATLQLDADQPADRDAENKQDLNPDGRRGIILSALRSPNSCVWSPPCHLPSERMTAFTANNAALELPYSGLVAPEQ*	ATGATGCTGAAAATGAGAGCAGTGCTATTCACCTTTCTGGTCCTGTTTCCCCTGGCAACGCTCCAGCTGGATGCAGATCAACCTGCAGACCGAGATGCAGAGAACAAACAGGACCTCAACCCAGATGGAAGGAGGGGAATCATATTGTCTGCTCTGAGATCTCCGAATTCATGTGTCTGGAGTCCTCCGTGTCATCTTCCATCGGAACGAATGACTGCTTTTACAGCCAACAATGCCGCACTCGAATTACCCTACAGTGGTTTGGTTGCTCCAGAACAATGA	16600.2	1	1
OK213_E_128	Conotoxin precursor	M	M-3a-WF	OK213A_TRINITY_DN117_c0_g1_i1_Frame_R3	MSKLGVVLFTFLLLFPLATLQRIQDQPADRNAEPRGKIRGRMNGFLTQMLFGHPGHNYAAWCPWCG*	ATGTCAAAACTGGGAGTCGTGCTGTTTACCTTTCTGCTTCTGTTTCCTCTGGCAACTCTTCAGCGCATTCAAGATCAACCTGCAGATCGTAATGCAGAGCCAAGGGGCAAGATCCGAGGTCGAATGAATGGATTCTTGACGCAAATGTTGTTCGGGCATCCAGGTCATAATTATGCCGCCTGGTGTCCTTGGTGTGGCTGA	187.308	1	1
OK213_E_129	Conotoxin precursor	M	M-3b-WF	OK213A_TRINITY_DN11163_c0_g1_i3_Frame_R1	MSKLGVVLFIFLVLFPMATLQLDGDQTADRHADQRGQDLTEQQRNSKRVLKKRDWEYHAHPKPNSFWTLV*	ATGTCTAAACTGGGAGTCGTGTTGTTCATCTTTCTAGTTCTGTTTCCCATGGCAACTCTTCAGCTGGATGGAGATCAAACCGCTGATCGTCATGCAGACCAAAGGGGCCAGGACCTAACAGAACAGCAACGAAACTCGAAGCGTGTTCTGAAGAAAAGGGATTGGGAATACCATGCACATCCAAAACCCAATAGCTTCTGGACGCTTGTTTGA	22.4023	1	1
OK213_E_130	Conotoxin precursor	M	M-3b-WF	OK213A_TRINITY_DN11163_c0_g1_i5_Frame_R1	MSKLGVVLFIFLVLFPMATLQMDADQTADRHADERDQDRAEQNRNLMRVLKRDWFHIDLTPNNKNTWWTLV*	ATGTCTAAACTGGGAGTCGTGTTGTTCATCTTTCTAGTTCTGTTTCCCATGGCAACTCTTCAGATGGATGCAGATCAAACCGCTGATCGCCATGCAGACGAAAGGGACCAGGACCGAGCAGAACAGAATCGAAACTTGATGCGTGTTCTGAAAAGGGATTGGTTCCATATAGATCTAACGCCAAACAACAAAAATACTTGGTGGACGCTTGTTTGA	8068.25	1	1
OK213_E_131	Conotoxin precursor	M	M-3b-WF	OK213A_TRINITY_DN11163_c0_g1_i4_Frame_R1	MSKLGVVLFIFLVLFPMATLQLDGDRTADRHADERGQDLAEQYGNLKHVMKRSSEHRAHHTHPHDNSFWTLV*	ATGTCTAAACTGGGAGTCGTGTTGTTCATCTTTCTAGTTCTGTTTCCCATGGCAACTCTTCAGCTGGATGGAGATCGAACCGCTGATCGTCATGCAGACGAAAGGGGCCAGGACCTAGCAGAACAGTATGGAAACTTGAAGCATGTTATGAAAAGGAGTTCGGAACACCGAGCACACCATACACATCCACATGATAATAGCTTCTGGACGCTTGTTTGA	2.18178	1	1
OK213_E_132	Conotoxin precursor	M	M-5	OK213A_TRINITY_DN173_c0_g1_i13_Frame_R2	MSKVGAVLLIFLVILSLAALQNGDDPRRQRDEKQSPKRGSLRKYSYNIQRRCVYSTPCGECTRRGKICSVEPGGRGTCGECVPGRR*	ATGTCGAAAGTGGGAGCTGTACTTCTCATCTTTCTGGTTATTTTGTCTTTGGCAGCCCTCCAGAATGGAGATGATCCAAGACGGCAAAGAGACGAGAAGCAAAGTCCTAAGAGGGGCAGTCTGAGAAAATACAGTTACAACATCCAACGACGTTGCGTGTATAGCACACCATGCGGCGAGTGCACCAGAAGGGGTAAAATATGCTCGGTGGAGCCTGGAGGAAGAGGCACCTGCGGGGAGTGCGTTCCAGGACGCAGATAG	44.486	1	1
OK213_E_133	Conotoxin precursor	M	M-5	OK213A_TRINITY_DN173_c0_g1_i19_Frame_R2	MSKVGAVLLIFLVILSLAALQNGDDPRRQRDEKQSPKRGIVQGNLRKYSYNIQRRCANSTPCTDCTSQGKTCQVQRGGKGTCGECIPPSG*	ATGTCGAAAGTGGGAGCTGTACTTCTCATCTTTCTGGTTATTTTGTCTTTGGCAGCCCTCCAGAATGGAGATGATCCAAGACGGCAAAGAGACGAGAAGCAAAGTCCTAAGAGGGGCATCGTTCAAGGCAATCTGAGAAAATACAGTTATAACATCCAACGACGTTGCGCGAACAGCACACCATGCACCGATTGCACCAGTCAGGGTAAAACATGCCAGGTGCAGAGGGGAGGAAAGGGCACCTGCGGGGAGTGCATTCCACCAAGCGGATAG	180.949	1	1
OK213_E_134	Conotoxin precursor	M	M-8	OK213A_TRINITY_DN622_c0_g1_i3_Frame_F2	MMLKLRVGVYILLVLLPLTTLQEKKDDASEAPVKQSDEKRAEGTIVMPDLTRDTSDSCSNERCNNTADCSTGCSCKFNQARRGETCLSG*	ATGATGTTGAAACTGAGAGTTGGGGTGTACATCCTCCTGGTTCTTTTGCCCCTGACAACCCTTCAAGAGAAAAAGGATGACGCCTCTGAAGCACCGGTCAAGCAGTCGGATGAGAAGCGTGCAGAGGGCACTATCGTGATGCCCGATCTGACCAGAGATACCAGTGACAGCTGTAGCAACGAACGATGCAACAATACTGCTGACTGTTCCACCGGTTGCTCTTGCAAATTTAACCAGGCTAGGCGGGGCGAAACCTGCCTCAGTGGTTAA	227.972	1	1
OK213_E_135	Conotoxin precursor	N	N-1	OK213A_TRINITY_DN476_c0_g2_i3_Frame_R2	MPPLKMMLLILLLLLLPLATCDGVVSDGQAIPVGGVPSAVNSRVRRLLGGDKERGRSVAKRCPGPKSCGSGEAEVCCESSDCYCKLLHSQPFSRLVCVCPD*	ATGCCACCACTGAAAATGATGCTGCTCATCCTCCTCCTGCTCCTGTTGCCCCTGGCAACCTGTGATGGTGTTGTTTCAGATGGACAAGCCATTCCAGTGGGAGGAGTCCCCAGTGCTGTGAACAGTCGAGTCAGACGTCTTCTGGGAGGGGACAAGGAAAGGGGTCGATCAGTCGCGAAGCGCTGCCCTGGTCCCAAGAGCTGTGGCAGCGGGGAAGCGGAGGTGTGCTGTGAAAGCTCTGACTGCTATTGCAAGCTGCTACACTCTCAGCCATTTAGCAGGCTTGTATGTGTTTGCCCCGACTAA	14.2622	1	1
OK213_E_136	Conotoxin precursor	N	N-2	OK213A_TRINITY_DN18886_c0_g1_i1_Frame_F2	MSTLGMVLLLFLLLLPLGNSDGDGDRQAMDRDRTAGGVRSAPSLRLRRHMDQGRSADKRCSTKLCG	ATGTCAACACTGGGAATGGTACTGCTGCTCTTCCTGCTTCTTCTGCCCCTGGGAAACTCAGATGGGGACGGGGATCGGCAAGCGATGGACAGAGACCGTACTGCCGGTGGGGTACGCAGTGCCCCCAGCCTCCGCTTGAGAAGACACATGGACCAGGGCCGATCTGCCGACAAACGTTGCTCCACTAAGCTATGCGGT	2.28513	0	0
OK213_E_137	Conotoxin precursor	O1	O1-1	OK213A_TRINITY_DN29921_c0_g1_i1_Frame_F2	MKLTCPLIVGLLFLSACQLTTTDDSRGRQGYHAVRTGTKMQNNKIFKLTKRCAAPGAPCSKYDNECCDACMLSHPNPPVCIV*	ATGAAACTGACGTGCCCTTTGATCGTCGGCTTGCTGTTCCTGTCGGCCTGCCAACTCACCACAACTGATGACTCCAGAGGTAGGCAGGGGTATCATGCTGTGAGGACGGGAACCAAGATGCAGAATAACAAGATCTTCAAGTTGACCAAGAGATGTGCTGCACCCGGCGCCCCTTGTAGCAAGTATGACAATGAGTGCTGCGATGCATGTATGTTATCACATCCGAATCCTCCAGTTTGCATAGTTTGA	0.334533	1	1
OK213_E_138	Conotoxin precursor	O1	O1-1	OK213A_TRINITY_DN27239_c0_g1_i1_Frame_F3	MGNSEIKPLINLNKRCDPPGSYCGGTVIHRHCCSGRCYLFKCK*	ATGGGGAATTCCGAGATCAAGCCACTCATCAACTTGAACAAGAGATGCGACCCCCCTGGATCGTATTGTGGCGGGACTGTCATCCACAGGCATTGTTGCAGTGGCAGGTGTTATCTTTTCAAGTGCAAGTGA	1.76352	1	1
OK213_E_139	Conotoxin precursor	O1	O1-1	OK213A_TRINITY_DN1024_c1_g1_i2_Frame_F2	MKVTCVLIVAVLILTACQLITAEYSRDKVEYPAERSRITMKGFRPTWTKRCSTSSVPCLQNSNCCSGTCQHINLGHKTCM*	ATGAAAGTGACGTGCGTGTTGATCGTTGCCGTGCTGATCCTGACGGCCTGTCAGCTCATTACAGCTGAGTACTCCAGAGATAAGGTGGAGTATCCCGCTGAGAGGTCGAGAATCACGATGAAAGGTTTCAGGCCCACATGGACCAAGAGGTGCAGCACTTCCAGCGTTCCTTGTCTTCAGAACAGCAATTGCTGCAGTGGTACATGTCAGCATATAAATCTTGGGCATAAAACGTGCATGTAA	18083.8	1	1
OK213_E_140	Conotoxin precursor	O1	O1-2	OK213A_TRINITY_DN32392_c0_g1_i1_Frame_R3	MKLTCVLIIAVLFLTACQLTTAKTYSRGRQMHRARRSTDKNSKWT	ATGAAACTGACGTGCGTGTTGATCATCGCCGTGCTGTTCCTTACGGCCTGTCAACTCACTACAGCTAAGACTTACTCCAGAGGTAGGCAGATGCATCGTGCTCGGAGGTCAACTGACAAAAACTCCAAGTGGACC	26.0465	0	0
OK213_E_141	Conotoxin precursor	O1	O1-2	OK213A_TRINITY_DN6854_c0_g1_i1_Frame_R3	MKLTCVLIIAVLFLTACQLTTAETYSRGRQKHRARRSTDKNSKWTRVCTDSGGACNSH	ATGAAACTGACGTGCGTGTTGATCATCGCCGTGCTGTTCCTGACGGCCTGTCAACTCACTACAGCTGAGACTTACTCCAGAGGTAGGCAGAAGCATCGTGCTCGGAGGTCAACTGACAAAAACTCCAAGTGGACCAGGGTATGCACAGATTCCGGCGGAGCCTGTAATAGTCAT	107731	0	0
OK213_E_142	Conotoxin precursor	O1	O1-2	OK213A_TRINITY_DN657_c0_g1_i24_Frame_R3	MKLTCVLIIAVLFLTACQLTTAETYSRGKQKYRVLRSTDKNSKWTRECTDSGGACNSHDQCCNEFCSTATRTCI*	ATGAAACTGACGTGCGTGTTGATCATCGCCGTGCTGTTCCTGACGGCCTGTCAACTCACTACAGCTGAGACTTACTCCAGAGGTAAGCAGAAGTATCGTGTTCTGAGGTCAACTGACAAAAACTCCAAGTGGACCAGGGAATGCACAGATTCCGGCGGAGCCTGTAATAGTCATGATCAATGCTGCAACGAGTTTTGCAGTACGGCGACCAGGACATGTATTTAA	16164.3	1	1
OK213_E_143	Conotoxin precursor	O1	O1-2	OK213A_TRINITY_DN32391_c0_g1_i1_Frame_R2	VLIIAVLFLTTCQLTTAETYSRGRQKHRARRSTAKNSKWTRECTHSGGACNSRDQCCNVFCDTATRTC	GTGTTGATCATCGCCGTGCTGTTCCTGACGACCTGTCAACTCACTACAGCGGAGACTTACTCCAGAGGTAGGCAGAAGCATCGTGCTCGGAGGTCAACTGCCAAAAACTCCAAGTGGACCAGGGAGTGCACACATTCCGGCGGAGCCTGTAATAGTCGTGATCAATGCTGCAACGTTTTTTGCGATACGGCGACCAGGACATGT	1.59312	0	0
OK213_E_144	Conotoxin precursor	O1	O1-2	OK213A_TRINITY_DN657_c0_g1_i12_Frame_R3	MKLTRVLIVAVLFLTACQLTAAETSSRSKQKYRVLRSTDKNSKWTRECTDSGGACNSHDQCCNAFCDTATRTC	ATGAAACTGACACGCGTGTTGATCGTCGCCGTGCTGTTCCTGACGGCCTGTCAACTCACTGCAGCTGAGACTTCCTCCAGAAGTAAGCAGAAGTATCGTGTTCTGAGGTCAACTGACAAAAACTCCAAGTGGACCAGGGAATGCACAGATTCCGGCGGAGCCTGTAATAGTCATGATCAATGCTGCAACGCTTTTTGCGATACGGCGACCAGGACATGT	3.38347	0	0
OK213_E_145	Conotoxin precursor	O1	O1-2	OK213A_TRINITY_DN657_c0_g1_i7_Frame_R3	MKLTRVLIVAVLFLTACQLTTAETYSRGKQKYRVLRSTDKNSKWTRECTHSGGACNSHDQCCNAFCDTATRTCV*	ATGAAACTGACACGCGTGTTGATCGTCGCCGTGCTGTTCCTGACGGCCTGTCAACTCACTACAGCTGAGACTTACTCCAGAGGTAAGCAGAAGTATCGTGTTCTGAGGTCAACTGACAAAAACTCCAAGTGGACCAGGGAATGCACACATTCCGGCGGAGCCTGTAATAGTCATGATCAATGCTGCAACGCTTTTTGCGATACGGCGACCAGGACATGTGTTTAA	4786.01	1	1
OK213_E_146	Conotoxin precursor	O1	O1-2	OK213A_TRINITY_DN657_c0_g1_i21_Frame_R1	MKLTCVMIVAVLFLTACQLTTAEISSRGKQKYRVLRSADENPKWTRECTHSGGACNSHDQCCNEFCSTATRTCI*	ATGAAACTGACGTGCGTGATGATCGTCGCCGTGCTGTTCCTGACGGCCTGTCAACTCACTACAGCTGAGATTTCCTCCAGAGGTAAGCAGAAGTATCGTGTTCTGAGGTCAGCTGACGAAAACCCCAAGTGGACCAGGGAATGCACACATTCCGGCGGAGCCTGTAATAGTCATGATCAATGCTGCAACGAGTTTTGCAGTACGGCGACCAGGACATGTATTTAA	3.70931	1	1
OK213_E_147	Conotoxin precursor	O1	O1-2	OK213A_TRINITY_DN35090_c0_g1_i1_Frame_R2	KYRVLRSTDKNSKWTRECTPPGGACNIHPHCCEEFCDMANNRCLEM*	AAGTATCGTGTTCTGAGGTCAACTGACAAAAACTCCAAGTGGACCAGGGAATGCACACCTCCCGGTGGAGCTTGTAATATTCATCCACATTGCTGCGAAGAATTTTGCGATATGGCAAACAACAGATGTTTGGAAATGTGA	8.64209	1	0
OK213_E_148	Conotoxin precursor	O1	O1-2	OK213A_TRINITY_DN657_c0_g1_i11_Frame_R1	MKLTCLMIVAVLFLTACQLTTAETSSRGKQKHRVLRSADKNPKWTRECTRPGGACYYDSHCCRHVCHEVFNTCM*	ATGAAATTGACGTGCTTGATGATCGTCGCCGTGCTGTTCCTGACGGCCTGTCAACTCACTACAGCTGAGACTTCCTCCAGAGGTAAGCAGAAGCATCGTGTTCTGAGGTCAGCTGACAAAAACCCCAAGTGGACCAGGGAATGCACACGTCCCGGTGGAGCTTGTTATTATGATTCACATTGCTGCCGACACGTTTGCCACGAGGTATTCAACACATGTATGTAA	9.52943	1	1
OK213_E_149	Conotoxin precursor	O1	O1-2	OK213A_TRINITY_DN657_c0_g1_i15_Frame_R3	MKLTCVLIIAVLFLTACQLTTAETSSRGKQKHRVLRSADKNPKWTRECTRPGGACYYDSHCCRHVCHEVFNTCM*	ATGAAACTGACGTGCGTGTTGATCATCGCCGTGCTGTTCCTGACGGCCTGTCAACTCACTACAGCTGAGACTTCCTCCAGAGGTAAGCAGAAGCATCGTGTTCTGAGGTCAGCTGACAAAAACCCCAAGTGGACCAGGGAATGCACACGTCCCGGTGGAGCTTGTTATTATGATTCACATTGCTGCCGACACGTTTGCCACGAGGTATTCAACACATGTATGTAA	11.0848	1	1
OK213_E_150	Conotoxin precursor	O1	O1-2	OK213A_TRINITY_DN657_c0_g1_i18_Frame_R1	MKLTCVMIVAVLFLTACQLTTAEISSRGKQKYRVLRSADENPKWTRECTRPGGACYYDSHCCRHVCHEVFNTCM*	ATGAAACTGACGTGCGTGATGATCGTCGCCGTGCTGTTCCTGACGGCCTGTCAACTCACTACAGCTGAGATTTCCTCCAGAGGTAAGCAGAAGTATCGTGTTCTGAGGTCAGCTGACGAAAACCCCAAGTGGACCAGGGAATGCACACGTCCCGGTGGAGCTTGTTATTATGATTCACATTGCTGCCGACACGTTTGCCACGAGGTATTCAACACATGTATGTAA	19.4897	1	1
OK213_E_151	Conotoxin precursor	O1	O1-2	OK213A_TRINITY_DN657_c0_g1_i1_Frame_R3	MKLTRVLIVAVLFLTACQLTAAETSSRSKQKYRVLRSTDKNSKWTRECTRPGGACYYDSHCCRHVCHEVFNTCM*	ATGAAACTGACACGCGTGTTGATCGTCGCCGTGCTGTTCCTGACGGCCTGTCAACTCACTGCAGCTGAGACTTCCTCCAGAAGTAAGCAGAAGTATCGTGTTCTGAGGTCAACTGACAAAAACTCCAAGTGGACCAGGGAATGCACACGTCCCGGTGGAGCTTGTTATTATGATTCACATTGCTGCCGACACGTTTGCCACGAGGTATTCAACACATGTATGTAA	0.777256	1	1
OK213_E_152	Conotoxin precursor	O1	O1-3	OK213A_TRINITY_DN985_c0_g1_i10_Frame_F3	MKLTCMMIVAVLFLTVWTCATADDSGNGLEKLFSNAHHEMKNPKDSKLNKRCLDGGEICGILFPSCCSGWCIVLVCA*	ATGAAACTGACGTGCATGATGATCGTTGCTGTGCTGTTCTTGACCGTCTGGACATGCGCCACGGCTGATGACTCCGGAAATGGATTGGAGAAACTTTTTTCGAATGCACATCACGAAATGAAGAACCCCAAAGACTCTAAATTGAACAAGAGGTGCCTTGACGGTGGTGAAATTTGTGGTATTTTGTTTCCAAGCTGCTGCAGTGGGTGGTGCATTGTTCTCGTCTGCGCATGA	0.641537	1	1
OK213_E_153	Conotoxin precursor	O1	O1-3	OK213A_TRINITY_DN985_c0_g1_i1_Frame_F3	MKLTCMMIVAVLFLTAWTFATADDPRNGLENLFSKAHHEMKNPKDSKLNKRCLDGGEICGILFPSCCSGWCIVLVCA*	ATGAAACTGACGTGCATGATGATCGTTGCTGTGCTGTTCTTGACCGCCTGGACATTTGCCACGGCTGATGACCCCAGAAATGGATTGGAGAATCTTTTTTCGAAGGCACATCACGAAATGAAGAACCCCAAAGACTCTAAATTGAACAAGAGGTGCCTTGACGGTGGTGAAATTTGTGGTATTTTGTTTCCAAGCTGCTGCAGTGGGTGGTGCATTGTTCTCGTCTGCGCATGA	8.75282	1	1
OK213_E_154	Conotoxin precursor	O1	O1-3	OK213A_TRINITY_DN985_c0_g1_i17_Frame_F3	MKLTCMMIVAVLFLTAWTFATADDPRNGLENLFSKAHHEMKNPKDSKLNKRCLDAGEMCDLFNSKCCSGWCIILFCA*	ATGAAACTGACGTGCATGATGATCGTTGCTGTGCTGTTCTTGACCGCCTGGACATTTGCCACGGCTGATGACCCCAGAAATGGATTGGAGAATCTTTTTTCGAAGGCACATCACGAAATGAAGAACCCCAAAGACTCTAAATTGAACAAGAGGTGCCTTGACGCTGGTGAAATGTGTGATCTTTTTAATTCAAAATGCTGCAGTGGGTGGTGCATTATTCTCTTCTGCGCATAA	19.8399	1	1
OK213_E_155	Conotoxin precursor	O1	O1-3	OK213A_TRINITY_DN985_c0_g1_i26_Frame_F1	MKLTCMMIVAVLFLTAWTFATADDPRNGLENLFSKAHHEMKNPEASKLNKRCKQADEPCSILSLDQCCSGVCFGICI*	ATGAAACTGACGTGCATGATGATCGTTGCTGTGCTGTTCTTGACCGCCTGGACATTTGCCACGGCTGATGACCCCAGAAATGGATTGGAGAATCTTTTTTCGAAGGCACATCACGAAATGAAGAACCCCGAAGCCTCTAAATTGAACAAGAGGTGCAAACAAGCTGATGAACCTTGTAGTATACTTTCACTTGATCAATGCTGCTCCGGCGTATGTTTTGGAATCTGCATATAG	5.37747	1	1
OK213_E_156	Conotoxin precursor	O1	O1-3	OK213A_TRINITY_DN985_c0_g1_i2_Frame_F1	MKLTCMMIVAVLFLTVWTCATADDSGNGLEKLFSNAHHEMKNPEASKLNKRCKQADEPCSILSLDQCCSGVCFGICI*	ATGAAACTGACGTGCATGATGATCGTTGCTGTGCTGTTCTTGACCGTCTGGACATGCGCCACGGCTGATGACTCCGGAAATGGATTGGAGAAACTTTTTTCGAATGCACATCACGAAATGAAGAACCCCGAAGCCTCTAAATTGAACAAGAGGTGCAAACAAGCTGATGAACCTTGTAGTATACTTTCACTTGATCAATGCTGCTCCGGCGTATGTTTTGGAATCTGCATATAG	17.2023	1	1
OK213_E_157	Conotoxin precursor	O1	O1-3	OK213A_TRINITY_DN985_c0_g1_i24_Frame_F3	MKLTCMMIVAVLFLTAWTFATADDPRNGLGNLFSNAHHEMKNPEASKLNKRWCKQSGEMCNLLDQNCCEGYCIVLVCT*	ATGAAACTGACGTGCATGATGATCGTTGCTGTGCTGTTCTTGACCGCCTGGACATTTGCCACGGCTGATGACCCCAGAAATGGATTGGGGAATCTTTTTTCGAATGCACATCACGAAATGAAGAACCCCGAAGCCTCTAAATTGAACAAGAGGTGGTGCAAACAAAGCGGTGAAATGTGTAATTTGTTAGACCAAAACTGCTGCGAGGGCTATTGCATAGTACTTGTCTGCACATAA	15.2684	1	1
OK213_E_158	Conotoxin precursor	O1	O1-3	OK213A_TRINITY_DN6904_c0_g1_i1_Frame_R2	MKLTCMMIVAVLFLTAWTFVTAVPDSSNALENLYLKAHHEMNNPEDSELNKRCYDGGTSCNTGNQCCSGWCIFVCL*	ATGAAACTGACGTGCATGATGATCGTTGCTGTGCTGTTCTTGACCGCCTGGACATTCGTCACGGCTGTGCCTGACTCCAGCAATGCGTTGGAGAATCTTTATCTGAAGGCACATCATGAAATGAACAACCCCGAAGACTCTGAATTGAACAAGAGGTGCTATGATGGTGGGACAAGTTGTAACACTGGAAACCAATGCTGCAGTGGCTGGTGCATTTTCGTCTGCCTCTAA	9.97176	1	1
OK213_E_159	Conotoxin precursor	O1	O1-3	OK213A_TRINITY_DN6904_c0_g1_i9_Frame_R2	MKLTCMMIVAVLFLTAWTFVTAVPDSSNALENLYLKALHETENHEASKLNVRDDECEPPGDFCGFFKIGPPCCSGWCFLWCA*	ATGAAACTGACGTGCATGATGATCGTTGCTGTGCTGTTCTTGACCGCCTGGACATTCGTCACGGCTGTGCCTGACTCCAGCAATGCGTTGGAGAATCTTTATCTGAAGGCACTTCACGAAACGGAAAACCACGAAGCCTCTAAATTGAACGTGAGAGACGACGAGTGCGAACCTCCTGGAGATTTTTGTGGCTTTTTTAAAATTGGGCCGCCTTGCTGCAGTGGCTGGTGCTTCCTCTGGTGCGCCTAA	16.2216	1	1
OK213_E_160	Conotoxin precursor	O1	O1-3	OK213A_TRINITY_DN985_c0_g1_i28_Frame_F3	MKLTCMMIVAVLFLTAWTLVMADDSNNGLANHFLKSRDEMEDPEASKLEKRACSKKWEYCIVPILGFVYCCPGLICGPFVCV*	ATGAAACTGACGTGCATGATGATCGTTGCTGTGCTGTTCTTGACAGCCTGGACGCTCGTCATGGCTGATGACTCCAACAATGGACTGGCGAATCATTTTTTGAAATCACGTGACGAAATGGAGGACCCCGAAGCTTCTAAATTGGAGAAAAGGGCGTGCAGCAAAAAATGGGAATATTGTATAGTACCGATCCTTGGATTCGTATATTGCTGCCCTGGCTTAATCTGTGGTCCTTTCGTCTGCGTTTGA	25.913	1	1
OK213_E_161	Conotoxin precursor	O1	O1-3	OK213A_TRINITY_DN985_c0_g1_i8_Frame_F1	MKMTYILIVAVLFLTAWTSVTAGDFKNKLKNLSLKARKEVENPKASKLHQKACVNRGDPCQRTVRCCSRRCGVNSCA*	ATGAAAATGACGTACATACTGATCGTTGCTGTGCTGTTCTTGACTGCCTGGACATCCGTCACGGCTGGTGACTTCAAAAATAAACTGAAGAATCTTTCTTTGAAGGCACGTAAAGAAGTGGAGAACCCCAAAGCCTCTAAATTGCACCAGAAAGCATGCGTAAACAGGGGTGATCCGTGTCAAAGGACTGTCAGATGCTGCAGTCGCAGATGTGGTGTTAACAGCTGCGCCTAG	25424.3	1	1
OK213_E_162	Conotoxin precursor	O1	O1-3	OK213A_TRINITY_DN985_c0_g1_i12_Frame_F1	MKLTYIMIVAVLLLTAWTFVTADDYKYGLENRFSKARNEVENPKASELDKRSCYEAGEFCFFSVPGLFICCSSVCLFHVCL*	ATGAAACTGACGTACATAATGATCGTTGCTGTGCTGTTATTGACTGCCTGGACATTCGTCACGGCTGATGACTACAAATATGGACTGGAGAATCGTTTTTCGAAGGCACGTAACGAAGTGGAGAACCCCAAAGCCTCTGAATTGGACAAGAGGAGCTGCTATGAGGCGGGTGAATTTTGTTTCTTCTCGGTCCCTGGACTCTTCATATGCTGCAGTAGCGTGTGCCTTTTCCACGTCTGCCTCTAG	95.7567	1	1
OK213_E_163	Conotoxin precursor	O1	O1-3	OK213A_TRINITY_DN6904_c0_g1_i6_Frame_R2	MKLTCMMIVAALFLTAWTFVTADDSINGPDNRGIWGKPSAKARDEMKNPKDSEWKWCHPRGEICFFKQYIPCCSGKCEVVCL*	ATGAAACTGACGTGCATGATGATTGTTGCTGCGCTGTTCCTCACTGCCTGGACATTCGTCACGGCTGATGACTCCATAAATGGACCAGACAATAGAGGAATTTGGGGGAAACCTTCTGCGAAGGCACGTGACGAAATGAAGAACCCCAAAGACTCTGAATGGAAATGGTGCCATCCTAGAGGTGAAATTTGTTTCTTCAAGCAATACATTCCATGCTGCAGTGGCAAGTGCGAAGTCGTCTGCTTGTAA	13.2698	1	1
OK213_E_164	Conotoxin precursor	O1	O1-3	OK213A_TRINITY_DN6904_c0_g1_i3_Frame_R2	MKLTCMMIVAVLFLTAWTFVMADDPRDGPDTAVRGGKRFWKARNEMNSAASKLNKRECLEADYYCVLPFVGNGMCCSGICVFVCIAQKY*	ATGAAACTGACGTGCATGATGATCGTTGCTGTGCTGTTCTTGACCGCCTGGACATTCGTCATGGCTGATGACCCCAGAGACGGACCGGATACGGCAGTAAGAGGGGGGAAACGTTTCTGGAAGGCACGTAACGAAATGAACTCCGCAGCCTCTAAATTGAACAAGAGAGAGTGCCTGGAAGCTGATTATTATTGCGTCTTACCGTTTGTGGGCAACGGGATGTGCTGCAGTGGCATTTGTGTTTTTGTCTGCATAGCCCAAAAGTATTAA	8.64926	1	1
OK213_E_165	Conotoxin precursor	O1	O1-3	OK213A_TRINITY_DN6904_c0_g1_i8_Frame_R2	MKLTCMMIVAVLFLTAWTFVMADDPRDGPDTVVRGGKLFSKARDEMNPAASKLNERDCLEPD	ATGAAACTGACGTGCATGATGATCGTTGCTGTGCTGTTCTTGACCGCCTGGACATTCGTCATGGCTGATGACCCCAGAGATGGACCGGATACTGTAGTAAGAGGGGGGAAACTTTTCTCGAAGGCACGTGACGAAATGAACCCCGCAGCCTCTAAATTGAACGAGAGAGACTGCCTTGAACCTGAT	2.03554	0	0
OK213_E_166	Conotoxin precursor	O2	O2-2	OK213A_TRINITY_DN649_c0_g2_i1_Frame_R2	MEKLTILLLVALVLMSTQALIQEKRQQAKINLSSKRKPSAKRWWGHDECTYWLGHCMVDSECCSDSCEEMFCGLW*	ATGGAGAAACTGACAATCCTGCTTCTTGTTGCTCTTGTACTGATGTCGACCCAGGCCCTAATTCAAGAAAAACGCCAACAGGCAAAAATCAACTTGTCTTCAAAAAGAAAGCCATCTGCTAAGCGTTGGTGGGGACACGACGAATGCACTTATTGGTTGGGGCATTGTATGGTGGACTCGGAATGCTGTTCTGATAGTTGTGAGGAAATGTTCTGCGGGTTATGGTGA	782.636	1	1
OK213_E_167	Conotoxin precursor	O2	O2-2	OK213A_TRINITY_DN2703_c0_g2_i2_Frame_F3	VAAVLMSIQALNQEQHQRAKINLLSKRKPPAERWWRWGGCMAWFGRCTKDSECCSNSCDITRCELMRFPPDW*	GTTGCTGCTGTACTGATGTCGATCCAGGCCCTAAATCAAGAACAACACCAACGGGCAAAGATCAACTTGCTTTCAAAGAGAAAGCCACCTGCTGAGCGTTGGTGGCGGTGGGGAGGATGCATGGCTTGGTTTGGGCGTTGTACGAAGGACTCGGAATGTTGTTCTAATAGTTGTGACATAACGCGCTGCGAGTTAATGCGATTCCCACCAGACTGGTGA	1.6386	1	0
OK213_E_168	Conotoxin precursor	O2	O2-2	OK213A_TRINITY_DN2703_c0_g2_i1_Frame_F3	MEKLTILLLVAALLLSIQAVNQEKHQRAKINLLSKRKPPAERWWRWGGCMAWFGRCTKDSECCSNSCDITRCELMRFPPDW*	ATGGAGAAACTGACAATTCTGCTTCTTGTTGCTGCTCTACTGTTGTCGATCCAGGCGGTAAATCAAGAAAAACACCAACGGGCAAAGATCAACTTGCTTTCAAAGAGAAAGCCACCTGCTGAGCGTTGGTGGCGGTGGGGAGGATGCATGGCTTGGTTTGGGCGTTGTACGAAGGACTCGGAATGTTGTTCTAATAGTTGTGACATAACGCGCTGCGAGTTAATGCGATTCCCACCAGACTGGTGA	10.196	1	1
OK213_E_169	Conotoxin precursor	O2	O2-2	OK213A_TRINITY_DN649_c0_g1_i1_Frame_R2	MEKLTILLLVAAVLMSTQALVERAGENRSKENIKFLLKRKRAADRGMWGKCKDGLTKCLAPSECCSGNCEQNCKMW*	ATGGAGAAACTGACAATCCTGCTTCTTGTTGCTGCTGTACTGATGTCGACCCAGGCCCTGGTTGAACGTGCTGGAGAAAACCGCTCAAAGGAGAACATCAAATTTTTATTAAAAAGAAAAAGAGCTGCTGACAGAGGGATGTGGGGCAAATGCAAAGATGGGTTAACGAAATGTCTTGCGCCCTCGGAGTGTTGTTCTGGGAATTGTGAACAGAACTGCAAGATGTGGTGA	4.71969	1	1
OK213_E_170	Conotoxin precursor	O2	O2-2	OK213A_TRINITY_DN649_c0_g1_i2_Frame_R2	MEKLTILLLVAAVLMSTQALVERAGENRSKENIKFLLKRKRAADRGMWGDCKDGLTTCFAPSECCSEDCEGSCTMW*	ATGGAGAAACTGACAATCCTGCTTCTTGTTGCTGCTGTACTGATGTCGACCCAGGCCCTGGTTGAACGTGCTGGAGAAAACCGCTCAAAGGAGAACATCAAATTTTTATTAAAAAGAAAGAGAGCTGCTGACAGGGGGATGTGGGGCGATTGCAAAGATGGGTTAACGACATGTTTTGCGCCCTCAGAGTGTTGTTCTGAGGATTGTGAAGGGAGCTGCACGATGTGGTGA	18.6303	1	1
OK213_E_171	Conotoxin precursor	O2	O2-2	OK213A_TRINITY_DN106_c0_g1_i13_Frame_F1	MQKLTILLLVAAVLMSTQALIQGGAKNRLKENMKLFSKRKAAAERGMWGECKDWLTVCLSPTECCSENCELYCRAW*	ATGCAGAAACTGACAATCCTGCTTCTTGTTGCTGCTGTACTGATGTCGACCCAGGCCCTGATTCAAGGGGGTGCAAAAAACCGCCTAAAGGAGAACATGAAATTGTTTTCAAAAAGAAAGGCAGCTGCTGAGAGGGGGATGTGGGGCGAATGCAAAGATTGGTTAACGGTATGTTTGTCGCCCACGGAATGTTGTTCTGAGAACTGTGAACTGTACTGTCGTGCGTGGTGA	5.75869	1	1
OK213_E_172	Conotoxin precursor	O2	O2-2	OK213A_TRINITY_DN106_c0_g1_i6_Frame_F1	MEKLAILLLVAAVLMSTQALIQGGAKNRLKENMKLFSKRKAAAERGMWGECKDWLTVCLSPTECCSENCELYCRAW*	ATGGAGAAACTGGCAATCCTGCTTCTTGTTGCTGCTGTACTGATGTCGACCCAGGCCCTGATTCAAGGGGGTGCAAAAAACCGCCTAAAGGAGAACATGAAATTGTTTTCAAAAAGAAAGGCAGCTGCTGAGAGGGGGATGTGGGGCGAATGCAAAGATTGGTTAACGGTATGTTTGTCGCCCACGGAATGTTGTTCTGAGAACTGTGAACTGTACTGTCGTGCGTGGTGA	310.549	1	1
OK213_E_173	Conotoxin precursor	O2	O2-2	OK213A_TRINITY_DN106_c0_g1_i4_Frame_F1	MQKLTILLLVAAVLMSTQALIQEKRPKERIRFLSKRKTEAEIWWEGECTDWLGSCLSPSDCCFEHCETFCRLW*	ATGCAGAAACTGACAATCCTGCTTCTTGTTGCTGCTGTACTGATGTCGACCCAGGCCCTGATTCAAGAAAAACGCCCAAAGGAGAGAATCAGATTTTTGTCAAAAAGAAAGACAGAAGCTGAGATTTGGTGGGAGGGCGAATGCACTGATTGGTTAGGGAGTTGTTTGTCGCCCTCAGACTGCTGTTTTGAGCATTGTGAAACGTTCTGCAGGTTGTGGTGA	2.46864e-05	1	1
OK213_E_174	Conotoxin precursor	O2	O2-2	OK213A_TRINITY_DN106_c0_g1_i12_Frame_F2	MEKLAILLLVAAVLMSTQALIQEKRPKERIRFLSKRKTEAEIWWEGECTDWLGSCLSPSDCCFEHCETFCRLW*	ATGGAGAAACTGGCAATCCTGCTTCTTGTTGCTGCTGTACTGATGTCGACCCAGGCCCTGATTCAAGAAAAACGCCCAAAGGAGAGAATCAGATTTTTGTCAAAAAGAAAGACAGAAGCTGAGATTTGGTGGGAGGGCGAATGCACTGATTGGTTAGGGAGTTGTTTGTCGCCCTCAGACTGCTGTTTTGAGCATTGTGAAACGTTCTGCAGGTTGTGGTGA	196.4	1	1
OK213_E_175	Conotoxin precursor	O2	O2-2	OK213A_TRINITY_DN106_c0_g1_i17_Frame_F3	MQKLTILLLVAAVLMSIQALNQRGGVKRPREMIKYLSKRKTALESWWENECSGWSVYCTKHSECCSDECIGYYCDLW*	ATGCAGAAACTTACAATCCTGCTTCTTGTGGCTGCTGTACTGATGTCGATCCAGGCTCTGAATCAACGTGGTGGAGTAAAACGTCCAAGGGAGATGATCAAATATTTATCAAAAAGAAAGACAGCTCTTGAGAGTTGGTGGGAAAACGAATGCAGTGGTTGGTCCGTGTATTGCACGAAGCACTCGGAATGTTGTTCTGATGAATGTATTGGTTATTACTGTGACTTGTGGTGA	24944	1	1
OK213_E_176	Conotoxin precursor	O2	O2-2	OK213A_TRINITY_DN106_c0_g1_i21_Frame_F2	MQKLTILLLVAAVLMSIQALNQGDGVKSPREKINFLSKRKTTAESWWEGECSGWSVYCTSDSECCSGECGNHYCELF*	ATGCAGAAACTTACAATCCTGCTTCTTGTGGCTGCTGTACTGATGTCGATCCAGGCTCTGAATCAAGGTGATGGAGTAAAAAGCCCAAGGGAGAAGATCAACTTTTTATCAAAACGAAAGACAACTGCTGAGAGTTGGTGGGAGGGCGAATGCAGCGGTTGGTCCGTGTATTGTACGTCGGACTCGGAATGTTGTTCTGGTGAATGTGGTAATCATTACTGTGAATTGTTCTGA	26.9006	1	1
OK213_E_177	Conotoxin precursor	O2	O2-2	OK213A_TRINITY_DN7285_c0_g1_i9_Frame_F3	MQKLTMLLLVAAVLMSIQALNQGGGVKSPREKINFLSKRKSAAESWWEGECRTWNAPCRLDSECCSGNCGKHHCLAW*	ATGCAGAAACTGACAATGCTGCTTCTTGTTGCTGCTGTACTGATGTCGATCCAGGCTCTGAATCAAGGTGGTGGAGTAAAAAGCCCAAGGGAGAAGATCAACTTTTTATCAAAAAGAAAGTCAGCTGCTGAGAGTTGGTGGGAGGGCGAATGCAGGACTTGGAATGCGCCGTGTAGGCTTGACTCGGAATGTTGTTCTGGTAATTGTGGCAAACACCATTGCCTGGCGTGGTGA	7.46854	1	1
OK213_E_178	Conotoxin precursor	O2	O2-2	OK213A_TRINITY_DN7285_c0_g1_i3_Frame_F3	MQKLTILLLLAAVLMSTQALIQGGVEKRQMAKIDFSKRKSTAESWWEGECRTWNAPCRLDSECCSGNCGKHHCLAW*	ATGCAGAAACTGACAATCCTGCTTCTTCTTGCTGCTGTACTGATGTCGACCCAGGCCCTGATTCAAGGTGGTGTAGAAAAACGTCAAATGGCGAAGATCGACTTTTCAAAAAGAAAGTCAACTGCTGAGAGTTGGTGGGAGGGCGAATGCAGGACTTGGAATGCGCCGTGTAGGCTTGACTCGGAATGTTGTTCTGGTAATTGTGGCAAACACCATTGCCTGGCGTGGTGA	5.85024	1	1
OK213_E_179	Conotoxin precursor	O2	O2-2	OK213A_TRINITY_DN2703_c0_g1_i3_Frame_F3	MEKLTILLLVAAVLMSTQALIQSGAEKRPWENIRFLSKRQASWEVWWEGNCIEWLASCSTDEQCCSGACDAYCTLW*	ATGGAGAAACTGACAATCCTGCTCCTTGTTGCTGCTGTGCTGATGTCGACCCAGGCCCTGATTCAAAGTGGTGCAGAAAAACGCCCATGGGAGAATATCAGATTTTTATCAAAAAGACAGGCAAGCTGGGAGGTATGGTGGGAAGGCAATTGCATTGAGTGGTTAGCATCGTGTTCGACGGACGAGCAATGCTGTTCGGGTGCTTGTGACGCCTACTGTACCCTGTGGTGA	6.21871	1	1
OK213_E_180	Conotoxin precursor	O2	O2-2	OK213A_TRINITY_DN7285_c0_g1_i2_Frame_F3	MQKLTILLLLAAVLMSTQALIQGGVEKSPKEKIRGFSEIWYTIWRWYHGKCKGWSNGCVRHSECCSYNCKGMYCDI*	ATGCAGAAACTGACAATCCTGCTTCTTCTTGCTGCTGTACTGATGTCGACCCAGGCCCTGATTCAAGGTGGTGTAGAAAAAAGCCCAAAGGAGAAGATCAGAGGTTTCTCAGAAATATGGTACACTATTTGGAGGTGGTATCATGGCAAATGCAAGGGTTGGAGCAATGGTTGTGTGCGGCACTCGGAATGTTGTTCTTATAATTGTAAGGGAATGTACTGCGACATTTAG	5.64324	1	1
OK213_E_181	Conotoxin precursor	O2	O2-2	OK213A_TRINITY_DN7285_c0_g1_i5_Frame_F3	MQKLTILLLVAAVLLSTQALNQEKRPKEMINFLSKGKTNAERRKRQCEDVWMPCTSNWECCSLDCEMYCTQIG*	ATGCAGAAACTGACAATCCTGCTTCTTGTTGCTGCTGTGCTGCTGTCGACCCAGGCCCTAAATCAAGAAAAACGCCCAAAGGAGATGATCAATTTTTTATCAAAAGGAAAGACAAATGCTGAGAGGCGGAAGCGCCAATGCGAGGATGTTTGGATGCCTTGTACATCGAACTGGGAATGCTGTTCTTTGGATTGTGAAATGTACTGCACACAGATAGGATGA	9.3018	1	1
OK213_E_182	Conotoxin precursor	O2	O2-2	OK213A_TRINITY_DN7285_c0_g1_i4_Frame_F1	MEKLTILLLVAAVLMSTQALYQEKRQKEMINFLSKGKINAERRKRGCKATWMSCSSGWECCSMSCDMYCG*	ATGGAAAAACTGACAATCCTGCTTCTTGTTGCTGCTGTGCTGATGTCGACCCAGGCCCTATATCAAGAAAAACGCCAAAAGGAGATGATCAATTTTTTATCAAAAGGAAAGATAAATGCTGAGAGGCGGAAGCGCGGATGCAAAGCTACTTGGATGTCTTGTTCATCGGGCTGGGAATGCTGTTCTATGAGTTGTGACATGTACTGCGGATAG	5.98992	1	1
OK213_E_183	Conotoxin precursor	O2	O2-2	OK213A_TRINITY_DN7285_c0_g1_i6_Frame_F1	MEKLTILLLVAAVLMSTQALFQEKRTMKKIDFLSKGKADAEKQRKRNCSDDWQYCESPSDCCSWDCDVVCSG*	ATGGAAAAACTGACAATCCTGCTTCTTGTTGCTGCTGTGCTGATGTCGACCCAGGCCCTGTTTCAAGAAAAACGCACAATGAAGAAGATCGATTTTTTATCAAAGGGAAAGGCAGATGCTGAGAAGCAGAGGAAGCGCAATTGCTCGGATGATTGGCAGTATTGTGAAAGTCCCAGTGACTGCTGTAGTTGGGATTGTGATGTGGTCTGCTCGGGATGA	0.00121488	1	1
OK213_E_184	Conotoxin precursor	O2	O2-2	OK213A_TRINITY_DN7285_c0_g1_i8_Frame_F3	MQKLTILLLVAAVLMSTQALFQEKRTMKKIDFLSKGKADAEKQRKRNCSDDWQYCESPSDCCSWDCDVVCSG*	ATGCAGAAACTGACAATCCTGCTTCTTGTTGCTGCTGTGCTGATGTCGACCCAGGCCCTGTTTCAAGAAAAACGCACAATGAAGAAGATCGATTTTTTATCAAAGGGAAAGGCAGATGCTGAGAAGCAGAGGAAGCGCAATTGCTCGGATGATTGGCAGTATTGTGAAAGTCCCAGTGACTGCTGTAGTTGGGATTGTGATGTGGTCTGCTCGGGATGA	8.90694	1	1
OK213_E_185	Conotoxin precursor	O2	O2-2	OK213A_TRINITY_DN2703_c0_g1_i1_Frame_F3	MEKLTILLLVAAVLMSTQAVLQEKRPKEKIKFLSKKKTDAEKQQKRLCPDYTEPCSHAHECCSWNCHNGHCTG*	ATGGAGAAACTGACAATCCTGCTCCTTGTTGCTGCTGTGCTGATGTCGACCCAGGCCGTGCTTCAAGAAAAACGCCCAAAGGAGAAGATCAAGTTTTTATCAAAGAAAAAGACAGATGCTGAGAAGCAGCAGAAGCGCCTTTGCCCGGATTACACGGAGCCTTGTTCACATGCCCATGAATGCTGTTCATGGAATTGTCATAATGGGCACTGCACGGGATGA	5.00186	1	1
OK213_E_186	Conotoxin precursor	O2	O2-4	OK213A_TRINITY_DN27548_c0_g1_i1_Frame_R2	MEKLTILLLVAAVLLSTQVLVQGDEENPLKPMIYFILTGRAIPGNTPKSCDQTGEPCVLNEQCCYGWCTNYGTCY*	ATGGAGAAACTGACAATCCTGCTTCTTGTTGCTGCTGTGCTGTTGTCAACCCAGGTCCTGGTTCAAGGTGATGAAGAAAACCCCCTGAAGCCGATGATCTACTTTATATTAACAGGAAGAGCGATACCAGGAAATACGCCAAAGAGTTGTGACCAGACTGGGGAGCCTTGTGTCTTAAATGAGCAATGCTGCTATGGTTGGTGCACAAACTACGGTACATGCTATTAG	1.83925	1	1
OK213_E_187	Conotoxin precursor	O2	O2-10	OK213A_TRINITY_DN42435_c0_g1_i1_Frame_F3	MMEKLAMLLLGATVLLLIHAIVGGDRGNDEDGWRRFLDLEKRCKNNSEPCTDTSECCNDLECSCLQPAACSDQTRGKCR	ATGATGGAAAAACTAGCAATGCTGCTTCTTGGTGCCACTGTCCTGCTGCTGATCCACGCCATTGTTGGAGGTGACAGAGGTAACGATGAAGATGGATGGAGAAGATTTTTGGACCTCGAGAAGCGTTGCAAGAACAACAGCGAGCCTTGCACGGACACCAGCGAATGCTGCAATGATTTAGAATGCAGCTGCCTTCAACCGGCTGCCTGCTCTGACCAAACCAGGGGAAAATGTAGA	1.24226	0	0
OK213_E_188	Conotoxin precursor	O2	O2-WF	OK213A_TRINITY_DN150_c0_g1_i4_Frame_R3	MMEKLIILILVAAVLLSTQVMVQGDADQPADRDAVPRDDNPGGTSGKLMNVLIRSGCPWHPWCG*	ATGATGGAGAAACTCATAATTCTGATTCTTGTTGCTGCTGTACTGTTGTCGACCCAGGTCATGGTTCAAGGTGATGCAGATCAACCTGCAGATCGTGATGCAGTGCCAAGAGACGATAACCCTGGTGGAACGAGTGGAAAGCTCATGAATGTTCTAATTCGGTCTGGATGTCCGTGGCATCCTTGGTGTGGCTGA	514.949	1	1
OK213_E_189	Conotoxin precursor	O2	O2-WF	OK213A_TRINITY_DN842_c0_g2_i3_Frame_R2	MGKLTILVLVAAALLSTQVMVQGDGDQPADRDAVPRDNIPGGTSEKFMNVLQRRGCPWKPWCG*	ATGGGGAAACTGACAATACTGGTTCTTGTTGCTGCTGCACTGTTGTCGACCCAGGTCATGGTTCAAGGTGACGGAGATCAACCTGCAGATCGTGACGCAGTGCCAAGAGACAATATTCCAGGTGGAACGAGTGAAAAGTTCATGAATGTTCTGCAAAGACGTGGATGTCCGTGGAAACCTTGGTGTGGCTGA	30.2578	1	1
OK213_E_190	Conotoxin precursor	O2	O2-WF	OK213A_TRINITY_DN842_c0_g1_i1_Frame_R3	MGKLTILVLVAAILLSTQVTVQGDRDQPADRNAVPRDDNPGRATRKFMKVLQGRGSECPWKPWCG*	ATGGGGAAACTGACAATACTGGTTCTTGTTGCTGCTATACTGTTGTCGACCCAGGTCACGGTTCAAGGTGACAGAGATCAACCTGCAGATCGTAATGCAGTGCCAAGAGACGATAACCCAGGCAGAGCGACAAGAAAGTTCATGAAAGTTCTGCAAGGACGTGGGTCTGAATGTCCGTGGAAACCTTGGTGTGGCTGA	43.9815	1	1
OK213_E_191	Conotoxin precursor	O2	O2-WF	OK213A_TRINITY_DN842_c0_g3_i1_Frame_R1	MGKLTILFLVAAALLSTQIMVQGDGDQPADRDAVPRDNKPGGTSGQFMTFLRQVRCRMTPLCR*	ATGGGGAAACTGACAATACTGTTTCTTGTTGCTGCTGCACTGTTGTCGACCCAGATCATGGTTCAAGGTGACGGAGATCAACCTGCAGATCGTGATGCAGTGCCAAGAGACAATAAGCCAGGTGGAACGAGTGGACAGTTCATGACTTTTCTGCGTCAGGTTCGCTGTCGGATGACACCTCTTTGTCGCTGA	23.2534	1	1
OK213_E_192	Conotoxin precursor	O2	O2-WF	OK213A_TRINITY_DN842_c0_g2_i4_Frame_R3	MEKLTILFLVDVLLSTQVMVQGDGGSVGRSLKGPIQLPWGKSVVLRKDVQSGWDQPADRNAVPRDDNPGGAIGKS*	ATGGAGAAACTGACAATACTGTTTCTTGTTGATGTACTGTTGTCAACCCAGGTCATGGTTCAAGGTGACGGAGGGTCTGTGGGGAGAAGTCTTAAGGGTCCTATTCAACTGCCTTGGGGAAAGAGTGTCGTCCTACGAAAAGATGTTCAGAGTGGATGGGATCAACCAGCAGATCGTAATGCTGTGCCAAGAGACGATAACCCAGGTGGAGCGATTGGAAAATCATGA	10.9806	1	1
OK213_E_193	Conotoxin precursor	O3	O3-1	OK213A_TRINITY_DN27913_c0_g1_i1_Frame_R1	MVLTLLLLVSMATSHQNGGEKQATQRDAFNFRRRRSLIRREITEACEEHCELEDKDCCGLTDGQPRCAQMCLG*	ATGGTGCTAACCCTTCTACTTCTTGTGTCCATGGCAACCAGTCATCAGAATGGAGGAGAGAAGCAGGCGACGCAAAGGGACGCATTCAACTTCAGACGGAGAAGATCACTCATTCGGAGAGAAATAACTGAGGCGTGCGAGGAGCACTGTGAGCTGGAGGACAAGGACTGCTGCGGTTTAACAGACGGACAACCCAGATGTGCCCAGATGTGCCTCGGATAG	0.432804	1	1
OK213_E_194	Conotoxin precursor	O3	O3-1	OK213A_TRINITY_DN35459_c0_g1_i1_Frame_R3	MVLTLLLLVSMATSHQDGGGKLAMQRDAINVGRRRSLTQRAVTEACEESCEVSGKTCCGITNGQPTCAPVCLG*	ATGGTGCTAACCCTTCTACTTCTTGTGTCCATGGCAACCAGTCATCAGGATGGAGGAGGGAAGCTGGCGATGCAAAGGGACGCAATCAACGTAGGACGGAGAAGATCACTCACTCAGAGAGCAGTAACTGAGGCGTGCGAAGAGTCCTGTGAGGTGTCGGGAAAGACCTGCTGCGGCATAACAAATGGACAACCCACATGTGCCCCTGTATGCCTCGGATAG	1.58695	1	1
OK213_E_195	Conotoxin precursor	O3	O3-2	OK213A_TRINITY_DN32_c0_g1_i16_Frame_R2	MSGLGIMVLTLLLLVSMATSHTDRGVGLLMQRDGLQERTCTSDDDCGDLQCCPDTVDKPEGRCDSDCTIY*	ATGTCAGGATTGGGAATCATGGTGCTAACCCTTCTACTTCTTGTGTCCATGGCAACCAGTCATACGGACAGAGGAGTGGGACTGCTGATGCAACGCGACGGGCTCCAAGAGAGAACCTGCACTTCTGACGACGATTGTGGCGATCTGCAATGCTGCCCCGACACAGTGGATAAACCCGAAGGGCGCTGTGATAGTGATTGCACTATCTATTAG	6198.53	1	1
OK213_E_196	Conotoxin precursor	O3	O3-2	OK213A_TRINITY_DN35427_c0_g1_i1_Frame_F2	MSGLGIMVLTLLLLVFMATSHQDAGVKRLMLRNKLQKRTCSSPSDCPTGQECCPDKVDEPEGFCVNECIITVYYTK*	ATGTCAGGATTGGGAATCATGGTGCTAACCCTTCTACTTCTTGTGTTCATGGCAACCAGTCATCAGGATGCAGGAGTGAAACGGCTGATGCTTCGCAACAAGCTCCAAAAGAGAACCTGCAGTTCTCCTTCGGATTGCCCCACGGGTCAGGAATGCTGCCCCGACAAAGTGGATGAACCAGAGGGGTTCTGTGTTAACGAGTGCATTATCACTGTGTATTACACAAAGTGA	1.08684	1	1
OK213_E_197	Conotoxin precursor	O3	O3-2	OK213A_TRINITY_DN32_c0_g1_i13_Frame_R2	MSGLGIMVLTLLLLVTMATSHEGNRVRRLMLQKKSDTGICKTDPECSTGQVCCSDSLQASDGYCTEANNCISY*	ATGTCAGGATTGGGAATCATGGTGCTAACCCTTCTACTTCTTGTGACCATGGCAACCAGTCATGAGGGTAACAGAGTGAGACGGCTGATGCTTCAGAAGAAGTCTGACACTGGAATCTGCAAAACCGATCCAGAATGCTCCACTGGTCAGGTATGCTGCTCCGACAGCTTGCAGGCTTCAGATGGGTACTGTACTGAAGCAAACAATTGCATTTCATATTAG	385.878	1	1
OK213_E_198	Conotoxin precursor	P	P-1a	OK213A_TRINITY_DN1752_c0_g4_i3_Frame_F3	MQLSLTRSALSMLLLLCALGNFVEVQPGQITRDVDNKQLTDNRRDLQSLMKPRTLLRSRGIPPRCGDGCVGGDDCSPQCPFCTHDNLCY*	ATGCAGCTGTCACTGACACGCTCAGCTCTTTCGATGTTGCTTCTGCTATGTGCCTTGGGCAACTTCGTTGAGGTCCAGCCAGGACAGATAACGAGAGATGTGGACAATAAGCAGCTCACGGACAACCGCCGTGACCTGCAATCGCTGATGAAGCCAAGGACTCTCTTGAGGTCACGTGGTATACCACCCAGGTGTGGAGATGGTTGCGTTGGTGGTGATGACTGCTCGCCCCAATGTCCGTTCTGTACGCACGACAATTTATGCTACTGA	95.3951	1	1
OK213_E_199	Conotoxin precursor	P	P-1a	OK213A_TRINITY_DN659_c0_g1_i2_Frame_R1	MHLSLAGSAVLMLLLLFALGVQSGQITRDADNGQLKANRRNLQSLWKKESSSLVYCRSPCSGVPVCPPTCSYCEGTPQICRRSSSTG*	ATGCATCTGTCACTGGCAGGCTCAGCTGTTTTGATGTTGCTTCTGCTGTTTGCCTTGGGGGTCCAGTCAGGACAGATAACAAGGGATGCGGACAATGGACAGCTCAAGGCCAACCGCCGTAACCTGCAATCGCTGTGGAAAAAAGAGAGCAGTTCTCTTGTCTATTGTCGATCCCCTTGCTCAGGAGTTCCTGTTTGCCCGCCAACTTGTTCTTATTGCGAGGGTACTCCACAAATATGCCGAAGAAGCAGCAGCACCGGATGA	157.83	1	1
OK213_E_200	Conotoxin precursor	P	P-1a	OK213A_TRINITY_DN19532_c0_g1_i1_Frame_R2	GVQSAQVTRDVDNGQLTDNRRNLQSMRKPKTLFKSLYKRSGCGEPCSEDADCPPGPSCPYCTQNLSKCM*	GGGGTCCAGTCAGCACAGGTAACAAGAGATGTGGACAATGGACAGCTCACGGACAACCGCCGTAACCTGCAATCGATGAGGAAGCCAAAAACTCTCTTCAAGTCACTTTACAAACGAAGCGGTTGTGGAGAACCTTGCTCAGAAGATGCGGATTGCCCGCCCGGTCCCAGTTGTCCTTATTGTACGCAAAATCTATCAAAATGCATGTGA	0.989906	1	0
OK213_E_201	Conotoxin precursor	P	P-2	OK213A_TRINITY_DN279_c0_g1_i11_Frame_F2	MTLSLARSAVLMLVLLLAFDSFVDVQPRGITRGARSRSGLLSKWYRNAGCSGDVCVSSADCSTCECQFRRCQIWTMDQGSPPS*	ATGACTCTGTCACTGGCGCGTTCAGCTGTTCTGATGCTGGTGCTACTGTTGGCCTTTGACAGCTTTGTTGACGTCCAGCCCAGAGGGATAACAAGGGGTGCGAGAAGCCGCTCTGGCCTGCTATCCAAGTGGTACAGGAATGCGGGGTGTTCAGGTGATGTTTGTGTGTCATCTGCGGACTGCAGCACTTGTGAATGTCAATTCAGGAGGTGCCAGATATGGACAATGGACCAGGGGAGTCCTCCAAGTTGA	19525.1	1	1
OK213_E_202	Conotoxin precursor	Q	Q-1a	OK213A_TRINITY_DN147_c0_g1_i1_Frame_R3	MHTLEMMLLVLLLLPLATGDGDGRAVGGDRNPNEARSANKRLLKRPARRMDINYCTPCPPALCCQPGSKCGISTHHDHNGEPACL*	ATGCACACACTGGAAATGATGCTGCTCGTCCTGCTTCTGTTGCCCCTGGCAACCGGTGACGGAGATGGACGAGCTGTGGGAGGGGACAGAAACCCCAATGAAGCACGCAGCGCCAACAAACGCCTTCTGAAAAGACCGGCCAGGCGCATGGACATAAACTATTGCACACCCTGTCCCCCTGCTCTCTGCTGCCAGCCTGGATCAAAATGCGGAATATCGACGCATCACGACCATAATGGCGAGCCTGCGTGTTTATGA	2389.93	1	1
OK213_E_203	Conotoxin precursor	Q	Q-1a	OK213A_TRINITY_DN4395_c0_g1_i1_Frame_F1	RNPNEARSATTRLLQGPARRMDTNDCTPCAPDLCCRPGLRCATSTRQGHYDEPACVSY*	AGAAACCCCAATGAAGCACGCAGCGCCACCACACGCCTTCTGCAAGGACCGGCCAGGCGCATGGACACAAACGATTGCACACCCTGTGCCCCTGATCTCTGCTGCCGTCCTGGATTAAGATGCGCAACATCGACGCGTCAAGGCCATTATGACGAGCCTGCGTGTGTATCATATTAA	5.77457	1	0
OK213_E_204	Conotoxin precursor	Q	Q-1a	OK213A_TRINITY_DN147_c0_g1_i6_Frame_R2	MHTLEMMLLVLLLLPLATGDGDGRAVGGDRNPNKARSATTRLLQGPARRMDGRNCTPCGPGLCCIPGKSCETSTHHGTFGQPACV*	ATGCACACACTGGAAATGATGCTGCTCGTCCTGCTTCTGTTGCCCCTGGCAACCGGTGACGGAGATGGACGAGCTGTGGGAGGGGACAGAAACCCCAATAAAGCACGCAGCGCCACCACACGCCTTCTGCAAGGACCGGCCAGGCGCATGGACGGACGCAATTGCACACCCTGTGGCCCTGGTCTCTGCTGCATTCCTGGAAAAAGCTGCGAAACATCGACGCATCACGGCACTTTTGGCCAGCCTGCGTGTGTATAA	1525.44	1	1
OK213_E_205	Conotoxin precursor	Q	Q-3	OK213A_TRINITY_DN476_c0_g1_i16_Frame_F3	MSKLGMMLLILLLLLPLAAFDGDRPTIRGQRSAKFLKSVIKRSCVKETPCASNKWCCENCCSSSDCECDFVGPNHMKSFVCVC*	ATGTCAAAACTGGGAATGATGCTGCTCATCCTCCTGCTTCTGTTGCCCCTGGCAGCCTTTGATGGGGATAGACCAACAATCCGAGGGCAAAGGAGCGCCAAGTTCTTGAAAAGTGTTATCAAACGCTCGTGCGTTAAAGAGACGCCTTGCGCCAGTAACAAGTGGTGCTGTGAAAATTGCTGTAGCAGTTCAGATTGTGAGTGTGATTTTGTCGGCCCTAATCATATGAAAAGCTTTGTATGTGTCTGCTAA	51.4763	1	1
OK213_E_206	Conotoxin precursor	Q	Q-3	OK213A_TRINITY_DN476_c0_g1_i8_Frame_R1	MSTLGMMLLILLLLLPLAAFDGDGPTSRGHSSDELLNSMNRRECEQNRNCESGRWCCDDCCTRQDCGCKAKDIGGGVMVQVCDC*	ATGTCAACACTGGGAATGATGCTGCTCATCCTCCTGCTTCTGTTGCCCCTGGCAGCCTTTGATGGTGATGGACCAACAAGCCGCGGGCACAGCAGCGACGAGTTGTTGAACAGTATGAACAGACGCGAGTGCGAACAAAATCGGAATTGCGAAAGTGGCAGGTGGTGCTGTGATGATTGCTGTACAAGGCAAGACTGTGGGTGTAAGGCCAAAGACATTGGTGGTGGGGTTATGGTCCAAGTATGTGACTGCTAA	627.553	1	1
OK213_E_207	Conotoxin precursor	T	T-1	OK213A_TRINITY_DN823_c0_g1_i20_Frame_R1	MRCLPVLIILLLLTASGPSVDAGLKTKDDVPLSDNAKSTLRRLQYKQACCGFKMCVPCG*	ATGCGCTGTCTCCCAGTCTTGATCATTCTTCTGCTGCTGACTGCATCTGGACCTAGCGTTGATGCCGGACTGAAGACCAAAGATGATGTGCCCCTGTCAGATAATGCAAAGAGTACCCTACGAAGACTCCAGTACAAACAGGCTTGCTGTGGCTTTAAGATGTGTGTTCCTTGTGGTTAA	15.3867	1	1
OK213_E_208	Conotoxin precursor	T	T-1	OK213A_TRINITY_DN823_c0_g1_i8_Frame_R3	MRCLPVFVILLLLIASAPSVDARLKTKDDMPLPSSHANIKRTLQIHRNKRCCPGWELCCEWDEW*	ATGCGCTGCCTCCCAGTCTTCGTCATTCTTCTGCTGCTGATTGCATCTGCACCTAGCGTTGATGCCCGATTGAAGACCAAAGATGATATGCCCTTGCCATCTTCCCACGCTAACATAAAGCGAACCCTGCAAATACATCGGAACAAACGCTGCTGCCCAGGCTGGGAATTGTGCTGCGAGTGGGATGAGTGGTAA	20.1394	1	1
OK213_E_209	Conotoxin precursor	T	T-1	OK213A_TRINITY_DN823_c0_g1_i7_Frame_R1	MRCLPVFVILLLLIASAPSVDAQLKTKDDVPLASFHANVKRTLQILLNKRCCQIVPQCCEWN*	ATGCGCTGCCTCCCAGTCTTCGTCATTCTTCTGCTGCTGATTGCATCTGCACCTAGCGTTGATGCCCAATTGAAGACCAAAGATGATGTGCCCTTGGCATCTTTCCACGCTAACGTAAAGCGAACCCTGCAAATACTTTTGAACAAACGCTGCTGCCAAATAGTGCCACAGTGCTGTGAGTGGAATTAA	11.7817	1	1
OK213_E_210	Conotoxin precursor	T	T-1	OK213A_TRINITY_DN6166_c1_g1_i2_Frame_R2	MRCLPVFVILLLLIASAPSVDARPKTKDGMPLASFHDNATRNLQILCCKHTLSCCTGK*	ATGCGCTGCCTCCCAGTCTTCGTTATTCTTCTGCTGCTGATTGCATCTGCACCTAGCGTTGATGCCCGACCGAAGACCAAAGATGGTATGCCCCTGGCATCTTTCCACGATAATGCAACTCGAAACCTGCAAATACTTTGCTGCAAACATACCCTCTCATGCTGTACAGGAAAATGA	3.25908	1	1
OK213_E_211	Conotoxin precursor	T	T-1	OK213A_TRINITY_DN5780_c1_g1_i1_Frame_F3	MCCIPVFIILLLLIPSAPSILAQPTTKGDVALASSYDDAKRTLQRLSIKYSCC	ATGTGCTGTATCCCAGTCTTCATCATTCTTCTGCTGCTGATTCCATCTGCACCTAGCATTCTTGCCCAACCGACGACCAAAGGTGATGTGGCCCTGGCATCTTCCTACGATGATGCAAAGCGAACCCTACAAAGATTGTCGATCAAATACAGCTGCTGC	2.00022	0	0
OK213_E_212	Conotoxin precursor	T	T-1	OK213A_TRINITY_DN6166_c0_g1_i2_Frame_F2	CLPVFVILLLLIASTPSVDAQLKTKDDMPQASFHDNAKRDLQRLLRTSDCCFYHNCCC*	TGCCTCCCAGTCTTTGTCATTCTTCTGCTGCTGATTGCATCTACACCTAGCGTTGATGCCCAACTGAAGACCAAAGATGATATGCCCCAGGCATCTTTCCACGATAATGCAAAGCGAGACCTGCAAAGACTTTTGAGAACGAGCGATTGCTGCTTCTACCACAATTGCTGCTGTTAA	1.62791	1	0
OK213_E_213	Conotoxin precursor	T	T-1	OK213A_TRINITY_DN823_c0_g1_i3_Frame_R3	MRCLPVLIILLLLTASAPGVDVLPKTEDDMPLSSVYGNGKSILRGILRKGICCGVSFCYPC*	ATGCGCTGTCTCCCAGTCTTGATCATTCTTCTGCTGCTGACTGCATCTGCACCTGGCGTTGATGTCCTACCGAAGACCGAAGATGATATGCCCCTGTCATCTGTCTACGGTAATGGAAAGAGTATCCTACGAGGAATTCTGAGGAAAGGTATTTGCTGTGGCGTTTCGTTCTGCTATCCATGTTAA	15.443	1	1
OK213_E_214	Conotoxin precursor	T	T-1	OK213A_TRINITY_DN823_c0_g1_i12_Frame_R3	MRCLPVLIILLLLTASAPGVDVLPKTEDDMPLSSVYGNGKSILRGILRKDVCCGFRMCHPC*	ATGCGCTGTCTCCCAGTCTTGATCATTCTTCTGCTGCTGACTGCATCTGCACCTGGCGTTGATGTCCTACCGAAGACCGAAGATGATATGCCCCTGTCATCTGTCTACGGTAATGGAAAGAGTATCCTACGAGGAATTCTGAGGAAAGATGTTTGCTGTGGCTTTAGGATGTGCCATCCATGTTAA	33.1459	1	1
OK213_E_215	Conotoxin precursor	T	T-1	OK213A_TRINITY_DN5780_c0_g1_i1_Frame_R2	VFIILLLLIASAPSFDARTKTDDDVPLSSLRDNQKRTIRTRLNIRECCSDGWCCTAAPLTGR*	GTCTTCATCATTCTTCTGCTGCTAATTGCATCTGCACCTAGCTTTGATGCCCGAACGAAGACCGATGATGATGTGCCCCTGTCATCTCTCCGCGATAATCAAAAGAGAACCATACGAACACGTCTGAACATACGCGAGTGCTGCTCGGATGGATGGTGCTGTACTGCTGCACCCTTAACAGGTCGTTAG	2.35122	1	0
OK213_E_216	Conotoxin precursor	T	T-1	OK213A_TRINITY_DN11721_c0_g1_i1_Frame_R2	MRCLPVFVILLLLIASAPSVDARMKPKDMPLASSQANVKGIHHILQIKNMCCGFKPYCCNW*	ATGCGCTGCCTCCCAGTCTTTGTCATTCTTCTGCTGCTGATTGCATCTGCACCTAGCGTTGATGCCCGAATGAAGCCCAAAGATATGCCCCTGGCATCTTCCCAAGCTAACGTAAAGGGAATCCATCACATACTTCAGATCAAAAACATGTGCTGCGGATTCAAGCCATATTGCTGTAATTGGTGA	1.67065	1	1
OK213_E_217	Conotoxin precursor	T	T-2-WF	OK213A_TRINITY_DN392_c0_g1_i7_Frame_R1	MLRLPIFILLVLALSPAASVPAEPELQTDLTRQSPKDFGMKTKHLPRVPWLRCLFKPGGWGGVRRDRMC*	ATGCTCCGTCTTCCGATCTTCATCCTCCTTGTGCTGGCCCTGTCACCTGCAGCCAGTGTTCCTGCGGAACCAGAGCTGCAAACAGATCTGACTCGGCAATCTCCTAAAGATTTTGGGATGAAAACTAAACACCTACCTCGTGTTCCTTGGCTCCGTTGCCTGTTTAAGCCCGGAGGCTGGGGCGGTGTTCGTCGGGACCGAATGTGTTAA	22.8091	1	1
OK213_E_218	Conotoxin precursor	T	T-2-WF	OK213A_TRINITY_DN392_c0_g1_i12_Frame_R3	MLRLPIFILLVLVLSPAVSAPAEPELQRDLTRQSPKDFGMKTKHLPRVPWLRCLFKPGGWGGVRRDRMC*	ATGCTCCGTCTTCCGATCTTCATCCTCCTTGTGCTGGTCCTGTCACCTGCAGTCAGTGCTCCTGCGGAACCAGAGCTGCAAAGAGATCTGACTCGGCAATCTCCTAAAGATTTTGGGATGAAAACTAAACACCTACCTCGTGTTCCTTGGCTCCGTTGCCTGTTTAAGCCCGGAGGCTGGGGCGGTGTTCGTCGGGACCGAATGTGTTAA	29.326	1	1
OK213_E_219	Conotoxin precursor	T	T-2-WF	OK213A_TRINITY_DN14061_c0_g1_i1_Frame_F2	MLGLPIFLLLLLVLSPAASVPVVSELQRDLTRQSPKDFGM	ATGCTCGGTCTTCCGATCTTCCTCCTCCTTCTGCTGGTCCTTTCACCTGCAGCTAGTGTTCCTGTGGTCTCAGAGCTGCAAAGAGATCTGACTCGGCAATCTCCTAAAGATTTTGGGATG	0.786999	0	0
OK213_E_220	Conotoxin precursor	T	T-2-WF	OK213A_TRINITY_DN392_c0_g1_i6_Frame_R2	MLRLPNFILLLLALSPAASVPVEPELQRDLTRRSPKDSGMRTKGVPPWINCPPTPKDCPWDKFGKTSAHK*	ATGCTCCGTCTTCCGAATTTCATCCTTCTTCTGCTGGCCCTGTCACCTGCAGCCAGTGTTCCTGTGGAACCAGAGCTGCAAAGAGATCTGACTCGTCGATCTCCTAAAGATTCTGGGATGAGAACTAAAGGCGTCCCACCTTGGATCAATTGCCCACCTACGCCCAAAGACTGTCCGTGGGATAAATTCGGAAAAACAAGTGCACATAAATAA	18.6297	1	1
OK213_E_221	Conotoxin precursor	T	T-4	OK213A_TRINITY_DN14977_c0_g1_i1_Frame_F2	MRCLPVVVFLLLLLSAAAAPGVGSKTERLPGLTSSGDSDESLPFLNTICCWSGACCGG*	ATGCGTTGCCTCCCAGTCGTCGTCTTCCTTCTCCTGCTGCTTTCAGCGGCGGCTGCTCCTGGGGTCGGATCGAAAACCGAAAGGCTTCCAGGGCTCACATCATCCGGAGATTCCGACGAGAGTCTCCCCTTTTTGAATACAATTTGCTGTTGGTCCGGCGCTTGCTGTGGTGGCTAA	7.01955	1	1
OK213_E_222	Conotoxin precursor	U	U-1b	OK213A_TRINITY_DN3976_c0_g1_i3_Frame_R2	MNRMGFFLTLTVAVLLTSLICTEAVPTDEGEVERHFNLAVLRGCRFCVIWCCPPRGVCQSSGCRPAYEALQTGQ*	ATGAACAGAATGGGATTTTTCCTGACGCTGACTGTTGCTGTGCTTCTGACTTCGCTCATCTGCACTGAAGCAGTGCCAACTGATGAAGGGGAAGTGGAAAGACACTTCAATCTCGCAGTGCTGAGGGGATGTAGATTTTGTGTAATTTGGTGCTGCCCTCCACGTGGTGTTTGCCAGTCGTCTGGGTGCCGTCCTGCATATGAGGCACTGCAGACTGGACAGTAA	12.8401	1	1
OK213_E_223	Conotoxin precursor	U	U-2	OK213A_TRINITY_DN3976_c0_g1_i1_Frame_R2	MIRMGFFLTLTVAVLLTSLICTEAVPTDKRAMERLFDHVLLKGQRNCPYCVVYCCPPAYCQASGCRPP*	ATGATCAGAATGGGATTTTTCCTGACGCTGACTGTTGCTGTGCTTCTGACTTCGCTCATCTGCACTGAAGCAGTGCCAACTGATAAAAGGGCAATGGAAAGACTCTTCGATCACGTTCTGCTGAAAGGTCAAAGGAACTGTCCTTATTGTGTAGTTTATTGCTGCCCTCCAGCATACTGCCAGGCGTCTGGGTGCCGTCCTCCATAG	0.876274	1	1
OK213_E_224	Conotoxin precursor	U	U-2	OK213A_TRINITY_DN3976_c0_g1_i6_Frame_R2	MNRMGFFLTLTVAVLLTSLICTEAVPTDKRAMERLFDHVLLKGQRNCPYCVVYCCPPAYCQASGCRPP*	ATGAACAGAATGGGATTTTTCCTGACGCTGACTGTTGCTGTGCTTCTGACTTCGCTCATCTGCACTGAAGCAGTGCCAACTGATAAAAGGGCAATGGAAAGACTCTTCGATCACGTTCTGCTGAAAGGTCAAAGGAACTGTCCTTATTGTGTAGTTTATTGCTGCCCTCCAGCATACTGCCAGGCGTCTGGGTGCCGTCCTCCATAG	3.89386e-08	1	1
OK213_E_225	Conotoxin precursor	V	V-4	OK213A_TRINITY_DN263_c2_g3_i1_Frame_F2	MSTPRMMLLIVLLLLPLEIPCGDGQAFQGDRRLRMSLLRRYKERDQVVCPLCDGSPCCGRCDRVWESYHCVNIGK*	ATGTCAACACCAAGAATGATGCTACTCATCGTCCTGCTTCTGTTGCCCCTGGAAATCCCTTGTGGTGATGGACAGGCGTTCCAAGGGGATAGACGCCTCAGAATGAGTCTTCTAAGAAGATACAAGGAACGTGATCAGGTGGTATGCCCTCTGTGCGATGGATCACCATGCTGTGGGAGGTGCGACCGGGTTTGGGAGTCCTATCATTGTGTAAACATAGGGAAATGA	6349.07	1	1
OK213_E_226	Conotoxin precursor	Y	Y-1	OK213A_TRINITY_DN232_c2_g3_i1_Frame_F3	MQKAIVLILAILLLLPLSTAQDDEGSQENAAPRKRDTASQCGGTGTHCNEPEGQNCCTSLKCVNNCCWTTTEGCPS*	ATGCAGAAAGCAATAGTTCTGATTCTGGCCATCCTGCTTTTGTTGCCCCTGTCAACGGCTCAGGATGATGAAGGTAGCCAGGAAAATGCTGCACCGAGAAAAAGAGACACAGCCTCACAGTGTGGTGGAACCGGTACCCATTGCAATGAACCTGAAGGCCAGAATTGTTGCACCAGCCTGAAGTGCGTTAATAACTGTTGCTGGACAACCACCGAGGGTTGCCCATCATGA	2282.21	1	1
OK213_E_227	Conotoxin precursor	Cerm01		OK213A_TRINITY_DN39616_c0_g1_i1_Frame_F1	MLLAVALLLNSVMSTDDVSIREKDATRREKRVNDNPCPPEVGNYCLSLNAHTCCKTECDSGNRCNSNVYKIWE*	ATGCTTCTGGCTGTCGCTCTGCTTCTGAATTCGGTGATGAGTACTGATGACGTGTCTATCCGTGAAAAGGACGCAACAAGGCGCGAAAAGAGAGTCAACGACAATCCCTGCCCCCCCGAAGTTGGGAATTATTGCCTGTCTCTAAATGCTCATACTTGCTGTAAAACCGAATGTGACTCGGGAAATCGATGCAATAGCAACGTCTATAAGATATGGGAGTGA	0.577005	1	1
OK213_E_228	Conotoxin precursor	Cerm02		OK213A_TRINITY_DN36305_c0_g1_i1_Frame_F1	MRFLLFLCIAVLLTSFRETEARLPDKAFRQRQSQYIQRIQRCPFCGFTCCSPNYCQGLDCVIVSSNDE*	ATGCGATTTCTTCTCTTTCTGTGCATTGCTGTGCTTCTGACTTCGTTCAGGGAGACAGAAGCGAGACTACCTGATAAAGCATTCAGGCAAAGGCAATCGCAGTACATCCAACGGATCCAACGTTGTCCTTTTTGTGGGTTCACGTGTTGCTCTCCAAACTACTGCCAAGGTCTTGATTGCGTGATTGTTTCAAGCAATGATGAATGA	674.837	1	1
OK213_E_229	Conotoxin precursor	Cerm02	Cerm02-02	OK213A_TRINITY_DN30851_c0_g1_i1_Frame_R2	MRVLLFLALAVLLTSFIETEGRLVSELLKNPRAKRQQCVSCGGKNYCTPKNCNGGQCYSGR*	ATGAGAGTGCTCCTGTTTTTGGCTCTTGCTGTGCTCCTGACTTCATTCATTGAGACTGAAGGACGACTCGTCAGTGAACTTCTCAAAAATCCAAGGGCGAAACGACAACAATGCGTTTCGTGCGGTGGAAAAAATTACTGCACACCAAAAAATTGTAATGGTGGTCAATGCTACTCTGGACGTTAA	3.78355	1	1
OK213_E_230	Conotoxin precursor	Cerm03	Cerm03-1	OK213A_TRINITY_DN471_c1_g1_i3_Frame_R1	MKLSMMFILALVLTLSMTDGFLRRAENAGRTFRQRSPHSMDLQTRLIKRIGSCPPDCEKLCLFDGICQE*	ATGAAACTGTCAATGATGTTCATTCTTGCTCTGGTTCTGACCCTGTCCATGACTGATGGTTTCCTTCGCCGCGCTGAAAACGCGGGAAGAACCTTTAGGCAGCGCAGTCCCCATTCTATGGATCTGCAAACTCGTCTGATAAAAAGAATTGGCTCATGCCCGCCGGACTGCGAGAAGCTCTGCCTCTTTGACGGCATCTGCCAGGAATGA	52.135	1	1
OK213_E_231	Conotoxin precursor	Cerm03	Cerm03-2	OK213A_TRINITY_DN4200_c0_g1_i2_Frame_R3	MMSVMLIVSLALTLSFTDGINFPGSKAFPWSDTATNRRVRQAAAVSGCVSQCPSGFCDADNTCVPPEEVNRRRRSTPHTK*	ATGATGTCAGTGATGTTGATTGTTAGTCTGGCTCTGACCCTGTCCTTTACCGATGGGATCAATTTTCCCGGGAGCAAAGCCTTTCCGTGGAGTGACACCGCGACCAACCGACGAGTTCGACAGGCAGCAGCAGTTTCTGGCTGTGTCAGCCAATGTCCGAGTGGATTTTGCGATGCGGACAACACGTGTGTGCCTCCCGAGGAAGTCAACAGGCGAAGACGTTCAACTCCACACACGAAATGA	134.68	1	1
OK213_E_232	Conotoxin precursor	Cerm03	Cerm03-3	OK213A_TRINITY_DN2967_c0_g1_i14_Frame_R3	MKMSATLIVLLVLGLSVTDGALHRTINGRGASGPHNRDAMGQLIPRGKCGDRCPSGICNVDGTCRD*	ATGAAGATGTCAGCAACGTTGATTGTTCTTCTGGTTCTGGGCCTGTCCGTCACTGATGGTGCCCTTCACCGTACCATCAACGGAAGGGGGGCATCTGGACCGCATAATCGGGATGCAATGGGTCAACTAATCCCGAGGGGGAAATGCGGTGACCGTTGCCCGAGTGGAATTTGCAATGTTGATGGGACTTGTAGGGACTAA	8409.32	1	1
OK213_E_233	Conotoxin precursor	Cerm03	Cerm03-3	OK213A_TRINITY_DN2967_c0_g1_i11_Frame_R3	MKMSATLIVLLVLGLSFTDGAPHRTINGREASGPHNRDALVQLILRRTCVGNCTVCPLTRNCKDQ*	ATGAAGATGTCAGCAACGTTGATTGTTCTTCTGGTTCTGGGCCTGTCCTTCACCGATGGTGCCCCTCACCGTACCATCAACGGAAGGGAGGCATCTGGACCGCATAATCGGGATGCATTGGTTCAACTAATCCTGAGGAGGACATGCGTTGGCAACTGCACAGTATGCCCTCTGACTAGGAACTGTAAGGACCAATAG	423.05	1	1
OK213_E_234	Conotoxin precursor	Cerm03	Cerm03-5	OK213A_TRINITY_DN1001_c0_g1_i25_Frame_F3	MKLTVMFIVFLMLTMPMASAEISRRTIDGGEAGVLAGDRATNKNALLQQRLCPTSCSSCSNC*	ATGAAGCTCACAGTGATGTTCATTGTCTTTCTGATGCTGACCATGCCCATGGCCAGTGCTGAGATTAGTCGCCGCACCATCGACGGGGGAGAGGCCGGTGTGCTCGCAGGCGACAGGGCAACTAACAAAAACGCGTTGCTGCAGCAAAGACTATGCCCTACCTCGTGCTCGAGCTGCTCAAATTGCTAG	114.309	1	1
OK213_E_235	Conotoxin precursor	Cerm03	Cerm03-5	OK213A_TRINITY_DN1001_c0_g1_i16_Frame_F3	MKLTVMFIVFLMLTMPMASAEITRRTVDEGEAGVLAGDRAANKMALLQERLCPPICNGCPGCY*	ATGAAGCTCACAGTGATGTTCATTGTCTTTCTGATGCTGACCATGCCCATGGCCAGTGCTGAGATTACTCGCCGCACCGTCGACGAGGGAGAGGCCGGTGTGCTCGCAGGCGACAGGGCAGCTAACAAAATGGCGCTCCTGCAGGAAAGACTATGCCCTCCCATTTGCAATGGCTGCCCAGGTTGCTACTGA	13053.8	1	1
OK213_E_236	Conotoxin precursor	Cerm03	Cerm03-6	OK213A_TRINITY_DN442_c0_g1_i4_Frame_R2	MQPSVMLVVLLMLTMPFINGLMPKTATKRKDVAPNDRNAVDSEKLKRFCPNICISCPAPDVCIVSKR*	ATGCAACCGTCGGTGATGCTTGTTGTTCTTCTGATGCTGACCATGCCCTTCATCAATGGTTTAATGCCCAAGACTGCCACCAAAAGGAAAGACGTTGCGCCAAACGATCGCAACGCGGTGGATTCCGAGAAATTAAAACGGTTTTGCCCTAACATATGCATTTCCTGCCCTGCTCCAGACGTCTGTATCGTATCAAAACGATGA	13.6904	1	1
OK213_E_237	Conotoxin precursor	Cerm03	Cerm03-6	OK213A_TRINITY_DN442_c0_g1_i6_Frame_R2	MQPSVMLVVLLMLTMPFINGLMPKTATKRKDVAPNDRNAVDSEKLKRFCPNPCQSCPSPGECVLPNSYAFILRLR*	ATGCAACCGTCGGTGATGCTTGTTGTTCTTCTGATGCTGACCATGCCCTTCATCAATGGTTTAATGCCCAAGACTGCCACCAAAAGGAAAGACGTTGCGCCAAACGATCGCAACGCGGTGGATTCCGAGAAATTAAAACGGTTTTGCCCTAATCCATGCCAATCCTGCCCTTCTCCAGGCGAATGTGTCCTACCAAATTCATATGCTTTCATCCTGCGTTTACGGTGA	85.4156	1	1
OK213_E_238	Conotoxin precursor	Cerm03	Cerm03-6	OK213A_TRINITY_DN442_c0_g1_i8_Frame_R2	MQPSVMLVVLLMLTMPFINGLMPKTATKRKDVAPNDRNAVDSEKLKRFCPNPCQSCPSPGECVRPYTGHTFFLHLR*	ATGCAACCGTCGGTGATGCTTGTTGTTCTTCTGATGCTGACCATGCCCTTCATCAATGGTTTAATGCCCAAGACTGCCACCAAAAGGAAAGACGTTGCGCCAAACGATCGCAACGCGGTGGATTCCGAGAAATTAAAACGGTTTTGCCCTAATCCATGCCAATCCTGCCCTTCTCCAGGCGAATGTGTCCGACCATATACGGGACACACTTTCTTCCTGCATTTACGGTGA	34.2389	1	1
OK213_E_239	Conotoxin precursor	Cerm06	Cerm06-1	OK213A_TRINITY_DN3414_c0_g1_i1_Frame_F3	MKVVVVLLAVLVVASTAPQKRFFIKDIQNWIQQLQAVFNKAKDKFNELTSGLGVHFDRIVDLLIDQIDSGMTEGACIKVCESSAGKILGNASSMAGMVCAPVCTAALAKLEEVAG*	ATGAAGGTTGTGGTTGTTCTGCTGGCTGTACTGGTGGTGGCCTCCACCGCGCCTCAGAAACGGTTCTTCATAAAAGACATCCAGAATTGGATCCAACAACTGCAGGCCGTTTTCAACAAAGCCAAGGACAAGTTTAACGAACTCACTTCCGGCCTGGGGGTCCACTTCGACAGGATTGTGGACCTGCTGATCGACCAGATTGATTCGGGCATGACGGAGGGAGCCTGCATAAAGGTGTGCGAGTCCAGCGCCGGCAAAATTCTTGGAAACGCTTCCTCCATGGCCGGTATGGTCTGCGCTCCAGTCTGCACAGCTGCCCTGGCTAAACTGGAGGAGGTCGCTGGTTAA	11.0053	1	1
OK213_E_240	Conotoxin precursor	Cerm06	Cerm06-2	OK213A_TRINITY_DN3414_c0_g2_i1_Frame_F3	MKVVVVLLASLAVVAYASPQKRFFIKDINNLLNQLKQTINNAKNQFDQITAGLGVNFDAVVDMLIDQIDSDTTQAACRTICVTGATEILQQAAPLANQVCEPACKAALAKMEEIAG*	ATGAAGGTTGTGGTTGTTCTGCTGGCCTCATTGGCCGTTGTGGCCTACGCCTCGCCACAGAAACGGTTCTTCATCAAAGACATCAACAACCTCCTGAACCAACTGAAACAAACGATCAACAACGCCAAGAATCAATTTGATCAAATCACAGCCGGCCTGGGTGTCAACTTTGACGCAGTTGTGGACATGCTGATCGACCAGATCGATTCGGACACGACCCAGGCCGCCTGCAGAACCATCTGCGTGACCGGTGCCACTGAGATTCTACAACAGGCTGCGCCCCTTGCCAACCAAGTCTGTGAGCCAGCATGCAAAGCTGCCCTGGCTAAAATGGAAGAAATTGCCGGTTGA	2.72415	1	1
OK213_E_241	Conotoxin precursor	Cerm08		OK213A_TRINITY_DN4313_c0_g2_i1_Frame_R2	MMLFMFAAIIFTMASATVTLDTCASAKGVCAWAGQGESCSCSAPHTCTQDDAHKVEVNMEGGVQALYTCQQISDFDVCTATGAVMPADFSQLYCRCSNNKYTIENDDVVCG*	ATGATGCTGTTTATGTTCGCTGCCATCATCTTCACCATGGCCTCAGCAACAGTCACTTTGGACACGTGTGCAAGTGCTAAGGGTGTGTGCGCATGGGCAGGGCAGGGTGAAAGTTGCAGCTGCTCAGCCCCTCACACCTGCACCCAGGACGATGCCCACAAAGTGGAAGTCAATATGGAAGGAGGCGTCCAGGCACTTTACACTTGCCAGCAGATCTCTGACTTTGACGTGTGTACTGCGACTGGTGCTGTGATGCCCGCCGACTTCAGCCAGTTGTACTGCAGATGTTCAAATAACAAGTACACCATAGAGAACGATGACGTTGTTTGTGGCTAG	1.75539	1	1
OK213_E_242	Conotoxin precursor	Cerm08		OK213A_TRINITY_DN4313_c0_g1_i1_Frame_R2	MMLFMFAAIIFTMASSTVNAHICEQNEDLCATLIDGVTTEICDCPNGACPRGNDYKITVGSVSLYTCQQISAFDDCTRGQHLVDDDFTQIYCKCSNGMYTVGGSQGIVCV*	ATGATGCTGTTTATGTTCGCTGCCATCATCTTCACCATGGCCTCATCAACAGTCAATGCGCACATTTGTGAACAGAATGAGGACTTGTGCGCAACGCTGATAGACGGTGTAACCACTGAAATTTGCGACTGCCCTAATGGCGCCTGCCCGAGGGGCAATGACTACAAAATTACTGTAGGCAGCGTATCACTGTACACTTGTCAACAGATCTCTGCCTTCGACGACTGTACCCGAGGTCAACATTTGGTGGACGACGATTTTACGCAGATATACTGCAAATGTTCAAATGGCATGTACACAGTAGGAGGATCGCAGGGCATTGTATGTGTCTAG	4.01651	1	1
OK213_E_243	Conotoxin precursor	Cerm08		OK213A_TRINITY_DN41987_c0_g1_i1_Frame_R1	ANSNTCDNNQKACAMIVSSVRDIHCNCASTGNCIIDPAHKIVVNSDTLFYSCQQISAFDICVGSQPVMDASLTQINCRCANNKYTF	GCAAACTCGAACACATGTGACAATAATCAGAAAGCGTGCGCAATGATAGTGTCAAGTGTGCGCGACATACACTGCAACTGCGCGAGCACTGGCAACTGCATCATTGACCCTGCCCACAAAATTGTCGTGAATTCCGACACGTTATTTTACAGTTGCCAGCAGATCTCTGCCTTCGACATTTGTGTCGGATCTCAACCTGTAATGGACGCCTCACTTACACAGATAAACTGCAGATGTGCAAATAACAAGTACACGTTT	0.413887	0	0
OK213_E_244	Conotoxin precursor	Cerm10	Cerm10-1	OK213A_TRINITY_DN2877_c0_g1_i4_Frame_R3	MKFSTFVMVLMAAVLLTGILETEARRSLRARLKAKRFDQDDYLERVEEICEGTNRDCRGQPDGTTCCRNSHCSQGVCYLNF*	ATGAAATTCTCAACGTTCGTGATGGTCCTGATGGCTGCTGTTCTCCTGACTGGCATCTTGGAGACTGAGGCCAGGAGATCGCTCAGAGCTAGACTGAAAGCAAAAAGATTTGATCAGGACGATTATCTGGAAAGGGTGGAAGAGATTTGTGAAGGAACGAATAGAGACTGCCGAGGGCAGCCGGATGGAACTACCTGCTGTCGAAATAGCCACTGCTCCCAAGGTGTATGCTACCTCAACTTCTAA	15661.5	1	1
OK213_E_245	Conotoxin precursor	Cerm10	Cerm10-1	OK213A_TRINITY_DN2877_c0_g1_i3_Frame_R3	MKFSTFVMVLMAAVLLTGILETEARRSLRARLKAKRFDPDDYLEKVEEACEGTNRNCVGQPFDAPCCGDGHCFLYVCHINF*	ATGAAATTCTCAACGTTCGTGATGGTCCTGATGGCTGCTGTTCTCCTGACTGGCATCTTGGAGACTGAGGCCAGGAGATCGCTCAGAGCTAGACTGAAAGCAAAAAGATTTGATCCGGACGATTATCTGGAAAAGGTGGAAGAGGCGTGTGAAGGAACGAATAGAAACTGCGTAGGGCAGCCGTTTGATGCTCCCTGCTGTGGAGATGGCCACTGCTTCCTATATGTATGCCACATCAACTTCTAA	616.862	1	1
OK213_E_246	Conotoxin precursor	Cerm10	Cerm10-2	OK213A_TRINITY_DN416_c0_g1_i1_Frame_F2	MKSTLFLTVLMAAVFLTFFTETDTTSIFKATEKRTDSEEFPCAGTFADCRDQPDETICCDTGACYGEVCYY*	ATGAAGTCCACACTCTTCCTGACGGTCCTGATGGCCGCCGTTTTCCTGACGTTCTTCACAGAGACTGATACAACGTCAATCTTCAAGGCCACAGAAAAAAGAACCGATTCAGAAGAATTCCCGTGTGCGGGCACGTTCGCGGACTGCCGGGACCAGCCTGATGAAACAATCTGCTGCGACACTGGGGCATGCTACGGGGAAGTATGCTATTATTGA	133.65	1	1
OK213_E_247	Conotoxin precursor	Cerm11	Cerm11-1	OK213A_TRINITY_DN1410_c1_g1_i2_Frame_F2	MEFRRLVTVALLLALVLSIDSTPADQTETGRVSLRKNDGFPCNSGECACLPRHISSNSYQCQSTTASKHLCVADKCITEDEW*	ATGGAATTTCGCCGGCTTGTGACTGTGGCGCTGCTTCTGGCTTTGGTCCTGAGTATTGATTCAACGCCTGCCGACCAAACGGAAACTGGAAGGGTTTCCCTACGCAAGAATGACGGATTTCCTTGCAATTCAGGCGAATGTGCATGTCTGCCGAGGCATATATCGTCGAATTCTTACCAGTGCCAATCGACCACAGCCAGTAAACATCTTTGTGTCGCTGATAAGTGCATAACGGAAGACGAATGGTGA	106.933	1	1
OK213_E_248	Conotoxin precursor	Cver02		OK213A_TRINITY_DN2_c1_g1_i4_Frame_F3	MPGRMIVLLAVLLLADLSTSLQDHGEKLLRGKVKVEERESCRTNHNDDCPSGQYCCGLPQESHGVCGRRC*	ATGCCAGGAAGGATGATCGTGCTGCTTGCTGTTCTGCTCCTCGCGGACCTGTCCACCAGTCTGCAGGACCATGGAGAGAAACTTCTGAGGGGAAAGGTCAAGGTCGAAGAGAGGGAAAGCTGTAGAACCAACCACAATGACGACTGCCCATCGGGACAATATTGCTGCGGACTCCCACAGGAGTCTCACGGAGTTTGTGGTAGAAGGTGCTAA	539.623	1	1
OK213_E_249	Conotoxin precursor	Cver04		OK213A_TRINITY_DN33213_c0_g1_i1_Frame_R2	MDMKMTFSGFVLAVLVTTVVGSSVRGGEVSGNLNHCWLPAFRQCLLECWILNFDNCYARCTTVLTEEFGADTNKYDCTIYKVCYYRCYVLGKPEAHCWEETAGSV	ATGGACATGAAGATGACGTTCAGCGGGTTTGTGCTGGCTGTCTTGGTAACCACTGTCGTTGGCTCGTCAGTTCGTGGCGGCGAGGTTTCGGGTAACTTGAACCATTGCTGGCTGCCTGCGTTTAGGCAGTGTCTGTTGGAATGTTGGATTTTGAATTTCGACAATTGCTATGCACGCTGCACAACAGTGCTGACGGAGGAATTCGGAGCAGACACCAATAAATATGATTGCACAATATACAAGGTTTGCTATTACCGGTGTTACGTGTTGGGGAAACCTGAAGCCCATTGCTGGGAAGAAACCGCTGGATCAGTG	0.761045	0	0
OK213_E_250	Conotoxin precursor	Cver06		OK213A_TRINITY_DN13940_c0_g1_i2_Frame_R3	STCNTDNLELCSEATRLCGKGTSWDQCIGLCKCRNEQACTTDADHTVQVIRAPFQNRETYYTCRSLSTMDACQSNERAMSGNSENKYKILCKCDKTYQPRSLNDRKFVCQ*	TCGACGTGCAACACTGACAACCTGGAGCTGTGCTCAGAGGCCACCCGCCTGTGTGGAAAAGGAACCTCTTGGGACCAGTGCATTGGACTGTGCAAGTGTCGAAACGAGCAGGCCTGCACCACTGACGCTGACCACACGGTCCAAGTCATCCGTGCACCGTTTCAAAATCGCGAGACGTATTACACGTGCAGGAGTCTTTCCACGATGGATGCTTGTCAATCAAACGAGAGAGCTATGAGTGGGAACAGTGAGAACAAGTATAAGATTCTGTGTAAATGTGACAAAACTTACCAGCCACGTTCCTTGAATGATCGGAAATTCGTCTGTCAGTAA	0.998018	1	0
OK213_E_251	Conotoxin precursor	Ggeo01		OK213A_TRINITY_DN182_c1_g1_i26_Frame_R3	MSRLFLILLAISVITVWVDAFQADDSGLDKKSRPLSRAARDHANSDFFGKLQAAELDRHRRILTETPFNSPNANHYHKVQHF*	ATGTCACGCCTCTTCCTCATTCTTCTGGCGATTTCTGTCATCACTGTGTGGGTCGATGCATTCCAGGCTGATGACAGTGGCCTTGACAAGAAGTCCAGACCATTGTCACGTGCCGCCAGGGACCACGCCAACTCTGACTTCTTCGGGAAACTTCAGGCCGCAGAGCTTGACAGACATCGACGTATATTGACCGAAACTCCATTTAACAGCCCCAACGCCAACCACTACCACAAAGTGCAACATTTCTAA	8125.26	1	1
OK213_E_252	Conotoxin precursor	Ggeo01		OK213A_TRINITY_DN1187_c0_g1_i1_Frame_R1	MSRLFLVLLAISVLTLHTDSIQDHDGGADKSSGPVARAARDKASPALFRKFRARANVRSRRIGRAVEDFPGAEEEEEDEELDDGRKALLAKKIKNKFFHLYHLHRL*	ATGTCACGCCTGTTCCTGGTTCTTCTGGCGATCTCTGTCCTCACTCTCCACACTGACTCCATCCAGGACCATGACGGTGGTGCGGACAAGAGCTCCGGACCTGTGGCACGTGCTGCCAGAGACAAGGCCTCCCCTGCCCTCTTCCGCAAGTTCCGGGCCCGCGCCAACGTCCGCAGCCGGAGAATCGGACGCGCTGTTGAAGACTTTCCCGGCGCTGAGGAGGAGGAAGAGGATGAGGAGTTGGACGATGGAAGGAAAGCTCTACTGGCCAAGAAGATTAAGAATAAGTTTTTCCACCTCTACCACCTTCACAGGCTGTAA	19.6254	1	1
OK213_E_253	Conotoxin precursor	Ggeo01		OK213A_TRINITY_DN9086_c0_g1_i1_Frame_R1	MSRLFLVLLVISVITLHTDSSQGTDGSTDVGSGPSHGYQRKLRVRIFRRTSVDDKTGSEQEEEEEP*	ATGTCACGCCTCTTCCTGGTTCTTCTAGTGATTTCTGTTATCACTCTCCACACTGACTCATCCCAGGGTACTGACGGTAGCACTGACGTGGGGTCCGGGCCCAGTCATGGTTATCAGCGCAAACTCCGGGTCCGCATCTTCCGCAGAACGAGCGTTGATGACAAGACTGGTTCAGAGCAGGAAGAGGAGGAAGAGCCTTAA	16.6945	1	1
OK213_E_254	Conotoxin precursor	Ggeo01		OK213A_TRINITY_DN25499_c0_g1_i1_Frame_F2	LVISVITLQTDSSQGTDGSTDVGSRPMSRAVTGHGVQGKLRVRASRRHVVDEHTAEELEWEEEFYWLLGRRAVQKRGIRRMKKWNINQKY*	CTAGTGATTTCTGTTATCACTCTCCAAACTGACTCATCCCAGGGCACTGACGGTAGCACTGACGTGGGGTCCAGGCCTATGTCACGCGCTGTCACGGGTCATGGTGTTCAGGGCAAACTCCGAGTCCGCGCCTCCCGCAGGCATGTTGTGGATGAACACACGGCCGAGGAGCTGGAATGGGAAGAGGAATTTTACTGGCTTTTAGGTCGACGAGCTGTGCAGAAAAGGGGGATTCGAAGAATGAAAAAATGGAACATCAACCAGAAATACTGA	1.37758	1	0
OK213_E_255	Conotoxin precursor	Ggeo01		OK213A_TRINITY_DN464_c0_g1_i1_Frame_F3	MSRLFLILLVISVITMCTNTSQDGNVGIDKRSGQLSRAIEDNANTGFSWKRLAITKFRRSGRSLSDHTIEEDESEEMNNFS*	ATGTCACGCCTGTTCCTGATTCTTTTGGTGATTTCTGTCATCACTATGTGCACTAATACCTCCCAGGATGGTAATGTTGGCATTGACAAGAGGTCCGGACAGTTGTCACGTGCTATCGAGGACAACGCCAACACTGGTTTCTCCTGGAAACGCCTAGCTATCACCAAATTTCGCAGGTCTGGACGTAGCCTGAGCGACCATACTATAGAGGAGGATGAATCTGAGGAGATGAACAACTTCTCTTAA	109.043	1	1
OK213_E_256	Conotoxin precursor	Ggeo01		OK213A_TRINITY_DN732_c0_g2_i12_Frame_F3	MPRLFLILLAISVITLKADASQADDGGPDNWSRLLSRAAGDNAYSGFSRKLLQAAIKRRDAVDDPAALPTESPGRSINSQQNL*	ATGCCACGCCTCTTCCTGATTCTTCTGGCGATTTCTGTCATCACTCTGAAGGCTGATGCGTCCCAGGCTGATGACGGGGGTCCTGACAATTGGTCCAGACTGTTGTCACGTGCTGCCGGGGACAACGCCTACTCTGGCTTCTCCAGGAAACTTCTTCAGGCCGCCATCAAGCGACGTGACGCGGTGGACGACCCAGCAGCCCTTCCCACAGAGTCCCCCGGACGATCCATAAACTCCCAACAGAATCTGTAG	94.7019	1	1
OK213_E_257	Conotoxin precursor	Ggeo03	Ggeo03-2	OK213A_TRINITY_DN10_c0_g1_i3_Frame_R3	MKMYLCLAIVLLLASAIAGSPLDKTETARNWRPKEKYEQQCDECMCSNLNVGICIIQSNICSGPCESGCDDNQCKCNYFKDGICTSKSACNDTVC*	ATGAAAATGTACCTGTGTCTTGCTATTGTTCTGCTCCTGGCTTCTGCCATAGCTGGTTCACCACTTGATAAAACGGAAACTGCAAGAAATTGGAGACCCAAAGAAAAATATGAACAGCAGTGTGACGAATGCATGTGCAGCAATTTAAATGTGGGCATATGCATAATACAGTCCAACATTTGCAGTGGTCCTTGCGAAAGCGGATGTGACGACAATCAATGCAAGTGTAATTATTTCAAAGACGGAATATGCACATCAAAGTCCGCTTGCAATGATACAGTGTGTTGA	15.3368	1	1
OK213_E_258	Conotoxin precursor	Ggeo03	Ggeo03-2	OK213A_TRINITY_DN10_c0_g1_i2_Frame_R3	MKMYLCLAIVLLLASAIAGSPLDKTETARNWGREERDEAQCPECRCTNLKEGLCVDSTECSGSCKGGCENYNCKCDYFQQGRCVLKSNCIDTVC*	ATGAAAATGTACCTGTGTCTTGCTATTGTTCTGCTCCTGGCTTCTGCCATAGCTGGTTCACCACTTGATAAAACGGAAACTGCAAGAAATTGGGGACGCGAAGAAAGAGATGAAGCCCAGTGTCCTGAATGCAGGTGCACCAACTTAAAAGAGGGCTTATGTGTAGACAGCACAGAATGCAGTGGTTCTTGCAAAGGCGGATGTGAAAACTATAATTGCAAGTGTGATTATTTCCAACAAGGAAGATGCGTATTAAAGTCCAATTGCATAGATACAGTATGTTGA	8.95055	1	1
OK213_E_259	Conotoxin precursor	Ggeo03	Ggeo03-2	OK213A_TRINITY_DN10_c0_g1_i1_Frame_R3	MKMYLCLAIVLLLASAIAGSPLDQTETARKERDPQTCKECKCSNLKVGICVQPNRCSGACGDGCTNGCKCSQLFSGTCTQRSNCHDKVC*	ATGAAAATGTACCTGTGTCTTGCTATTGTTCTGCTCCTGGCTTCTGCCATAGCTGGTTCACCACTTGATCAAACGGAAACTGCAAGAAAAGAAAGAGATCCACAAACGTGTAAGGAATGCAAGTGCAGCAACTTAAAAGTGGGCATATGCGTACAGCCCAACCGTTGCAGTGGTGCTTGTGGTGACGGATGTACAAACGGTTGCAAGTGTTCTCAATTATTTTCAGGAACATGCACACAAAGGTCTAATTGCCATGATAAAGTGTGTTGA	2204.1	1	1
OK213_E_260	Conotoxin precursor	Pmag02		OK213A_TRINITY_DN155_c0_g1_i7_Frame_F3	MKAVAVFMIVSLAVAYGQFFCPESENDPLNCLETQPNSATCMQSSDDQSYSYVCGYCGKKKETCFGNKAAVQDYYCQRNGIANTCGGAAQ*	ATGAAGGCTGTGGCTGTGTTTATGATTGTCTCCCTTGCTGTGGCTTACGGCCAGTTCTTCTGCCCGGAGAGTGAGAATGACCCCCTGAACTGCCTGGAGACCCAGCCCAATTCCGCCACCTGCATGCAGTCCAGCGACGATCAGTCCTACTCCTATGTGTGCGGCTACTGCGGCAAGAAGAAGGAGACTTGCTTCGGGAACAAAGCGGCGGTACAGGATTACTACTGCCAGAGAAACGGCATCGCCAACACCTGCGGCGGCGCCGCTCAGTGA	65.4161	1	1
OK213_E_261	Conotoxin precursor	Pmag02		OK213A_TRINITY_DN155_c0_g1_i3_Frame_F3	MKTVAVFLVVALAVAYGQFFCPDSEDDPLNCLETQATSATCMKSTEDETYSYVCGYCGKKKETCFGKKVPTSDYNCQIHKIPNHCGGPVM*	ATGAAGACTGTGGCTGTGTTTCTGGTTGTCGCCCTTGCTGTGGCTTATGGCCAGTTCTTCTGCCCGGATAGCGAAGACGATCCCCTGAACTGCCTGGAGACTCAGGCGACCAGTGCCACGTGCATGAAGTCAACGGAGGATGAGACCTACTCCTATGTGTGCGGCTACTGCGGCAAGAAAAAGGAGACTTGTTTCGGCAAGAAAGTGCCAACGTCTGACTACAACTGCCAGATTCACAAGATCCCGAACCACTGCGGCGGCCCTGTTATGTGA	15577.4	1	1
OK213_E_262	Conotoxin precursor	Pmag02		OK213A_TRINITY_DN155_c0_g1_i1_Frame_F3	MKAVAVFMIVSLAVAYGQFFCPESENDPLNCLETQPNSATCMQSSDDQSYSYVCGYCGKKKETCFGKKVPTSDYNCQIHKIPNHCGGPVM*	ATGAAGGCTGTGGCTGTGTTTATGATTGTCTCCCTTGCTGTGGCTTACGGCCAGTTCTTCTGCCCGGAGAGTGAGAATGACCCCCTGAACTGCCTGGAGACCCAGCCCAATTCCGCCACCTGCATGCAGTCCAGCGACGATCAGTCCTACTCCTATGTGTGCGGCTACTGCGGCAAGAAAAAGGAGACTTGTTTCGGCAAGAAAGTGCCAACGTCTGACTACAACTGCCAGATTCACAAGATCCCGAACCACTGCGGCGGCCCTGTTATGTGA	9.73084	1	1
OK213_E_263	Conotoxin precursor	Pmag02		OK213A_TRINITY_DN155_c0_g1_i8_Frame_F3	MKTVAVFLVVALAVAYGQFFCPDSENDPLNCIETKATAATCMKSKTDGSYSYACGYCGKKKESCFGDKVPVTDYNCQTRKIANPCGGPAL*	ATGAAGACTGTGGCTGTGTTTCTGGTTGTCGCCCTTGCTGTGGCTTATGGCCAGTTCTTCTGCCCGGATAGCGAAAATGACCCCCTGAACTGCATTGAGACCAAGGCGACCGCTGCCACTTGCATGAAGTCCAAGACGGATGGATCCTACTCCTATGCCTGCGGCTACTGCGGCAAGAAGAAGGAGAGCTGTTTCGGCGACAAAGTGCCAGTGACTGACTACAACTGCCAGACGCGGAAGATTGCCAACCCCTGCGGCGGCCCTGCTCTCTGA	2.5609	1	1
OK213_E_264	Conotoxin precursor	Pmag02		OK213A_TRINITY_DN155_c0_g1_i2_Frame_F3	MKTVAVFLVVALAVAYGQFFCPDSENDPLNCVETMGTLATCMKSKSGKSYSYACGYCGKKKESCFGDKVPVDGYDCQVRNIANPCGGSAL*	ATGAAGACTGTGGCTGTGTTTCTGGTTGTCGCCCTTGCTGTGGCTTATGGCCAGTTCTTCTGCCCGGATAGCGAGAATGACCCCCTGAACTGCGTGGAGACCATGGGGACACTTGCCACTTGCATGAAGTCCAAGTCGGGCAAGTCCTACTCCTATGCCTGCGGCTACTGCGGCAAGAAGAAGGAGAGCTGTTTCGGCGACAAAGTGCCGGTGGATGGCTACGACTGCCAGGTGCGGAATATTGCCAACCCCTGCGGCGGCTCTGCTCTCTGA	3.27794	1	1
OK213_E_265	Conotoxin precursor	Pmag02		OK213A_TRINITY_DN155_c0_g1_i5_Frame_F3	MKTVAVFLVVALAVAYGQFFCPDSENDPLNCVETMGTLATCMKSKSGKSYSYACGYCGKKKESCFGDKVPVTDYNCQTRKIANPCGGPAL*	ATGAAGACTGTGGCTGTGTTTCTGGTTGTCGCCCTTGCTGTGGCTTATGGCCAGTTCTTCTGCCCGGATAGCGAGAATGACCCCCTGAACTGCGTGGAGACCATGGGGACACTTGCCACTTGCATGAAGTCCAAGTCGGGCAAGTCCTACTCCTATGCCTGCGGCTACTGCGGCAAGAAGAAGGAGAGCTGTTTCGGCGACAAAGTGCCAGTGACTGACTACAACTGCCAGACGCGGAAGATTGCCAACCCCTGCGGCGGCCCTGCTCTCTGA	4.28066e-05	1	1
OK213_E_266	Conotoxin precursor	Rimp01		OK213A_TRINITY_DN185_c0_g1_i3_Frame_R3	MARLLSMLLCIAVAVVLAAGIQYSAESPMQQCSTHAVSKMEVYSNNQGKYELLDSYCSCDSGEAYFEAQDTTTSSSTVSSYKIYVCGMPTESCTGGTLPVTDSDNGPRRMQCTCGQYKYFISASLGWHVRCK*	ATGGCGCGCTTGCTGTCCATGCTACTATGCATCGCCGTGGCAGTGGTCCTGGCTGCAGGCATACAATATTCAGCTGAAAGTCCGATGCAGCAGTGCAGCACGCACGCTGTCAGTAAAATGGAGGTGTACTCGAACAACCAGGGCAAATATGAACTCCTTGACTCGTACTGCTCCTGTGACAGCGGCGAGGCCTACTTTGAGGCCCAGGACACCACCACAAGCTCCTCCACGGTGTCATCATACAAAATCTACGTGTGCGGTATGCCAACAGAGTCGTGTACGGGAGGAACCTTACCAGTGACTGATTCGGACAATGGGCCACGAAGGATGCAATGCACATGCGGACAGTACAAGTATTTTATCTCCGCCAGTTTGGGATGGCATGTTCGTTGCAAGTAG	4954.7	1	1
OK213_E_267	Conotoxin precursor	Rimp01		OK213A_TRINITY_DN31167_c0_g1_i1_Frame_F1	MALLLSILLCIAVAVGLAAGIQYPTVRPIGPCSTNAISKTELYSNRYGRYVLHYSYCSCASGEVYFEAQDTTTSYTTVLYKIYACGAPTHSCSGETLPV	ATGGCGCTCTTGCTGTCCATTCTACTGTGCATCGCCGTGGCAGTGGGCCTGGCTGCAGGCATACAATATCCAACTGTTCGTCCGATCGGGCCGTGCAGCACGAACGCTATCAGTAAAACGGAGCTGTACTCGAACCGCTACGGCAGATATGTACTCCACTACTCGTACTGCTCCTGTGCCAGCGGCGAGGTCTACTTTGAGGCCCAGGACACCACCACAAGCTACACCACGGTGTTATACAAAATCTACGCGTGCGGTGCGCCAACACATTCGTGTTCGGGAGAAACTTTACCTGTG	0.698193	0	0
OK213_E_268	Conotoxin precursor	Rimp02		OK213A_TRINITY_DN12367_c0_g1_i1_Frame_F1	MRLSTMHSVILMLLLMFVFDNVHGDESGQTARDVDNGKFMSSPQSEGKLASFFMLRTKDNMCDLQRCPNDCSSPCWCSSQNTCEGDKK*	ATGCGTCTATCAACAATGCATTCAGTTATTCTGATGCTGCTTCTGATGTTTGTCTTTGACAACGTCCATGGGGACGAGTCTGGGCAGACAGCGAGGGATGTGGACAACGGAAAATTCATGAGCAGCCCACAATCTGAAGGAAAGCTTGCAAGTTTCTTCATGCTGCGTACAAAAGACAATATGTGTGACTTGCAACGTTGCCCCAATGATTGCAGCAGCCCTTGTTGGTGCAGTTCTCAAAATACCTGTGAGGGCGATAAAAAATGA	7.02246	1	1
OK213_E_269	Conotoxin precursor	Rimp05		OK213A_TRINITY_DN1393_c0_g1_i6_Frame_R1	MMKTGLIICLLLIAFMTGDGSPGNTMYRRKETGFASGIKRYQKNFFRRNCDNCPEEPCCYGDKCMSDPGHEPFCGN*	ATGATGAAGACTGGCTTGATCATCTGTCTGCTTTTGATTGCCTTTATGACTGGTGATGGTTCCCCTGGAAATACTATGTATAGGCGGAAGGAAACAGGCTTTGCATCCGGCATAAAAAGATATCAAAAAAACTTTTTTCGGAGGAACTGTGATAACTGTCCCGAGGAACCGTGCTGCTATGGTGACAAGTGCATGTCCGATCCCGGCCATGAACCTTTTTGCGGGAACTAA	89.0915	1	1
OK213_E_270	Conotoxin precursor	SF-mi1		OK213A_TRINITY_DN24_c0_g1_i2_Frame_R1	MSKTGIVLVVLYLLSSPVNLQQNEDNKAFSKMRSPTQIHWPDCNTCSANDDGRCVGTCCDGGVCEGGNLGCGCLYPGSTRG*	ATGTCGAAAACGGGAATTGTGCTGGTTGTCCTGTACCTTCTTTCTTCTCCAGTAAACCTTCAGCAGAATGAAGATAACAAGGCTTTCTCCAAGATGAGGAGCCCTACACAGATCCATTGGCCGGACTGCAACACCTGTTCTGCTAATGACGATGGACGATGCGTGGGGACTTGCTGCGACGGCGGCGTCTGCGAGGGAGGCAACCTCGGATGTGGATGTCTGTATCCTGGCAGTACCAGAGGCTAA	654.376	1	1
OK213_E_271	Conotoxin precursor	SF-mi1		OK213A_TRINITY_DN24_c0_g1_i4_Frame_R1	MSKTGIVLVVLYLLSSPVNLQQNEDDKAFSEIESPTLTRVLRCQKCKPNSSGFCEGTCCKAAFTCQAGHWGCSCVTGTHDYGLTTSG*	ATGTCGAAAACGGGAATTGTGCTGGTTGTCCTGTACCTTCTTTCTTCTCCAGTAAACCTTCAGCAGAATGAAGATGACAAGGCTTTCTCCGAGATCGAGAGCCCTACACTGACGCGTGTTCTGAGATGCCAAAAATGCAAACCCAATTCTTCCGGATTTTGCGAGGGGACCTGCTGTAAGGCTGCCTTCACCTGCCAGGCAGGCCACTGGGGATGTTCGTGTGTCACCGGGACACACGATTACGGATTAACAACGTCAGGCTAG	1021.8	1	1
OK213_E_272	Conotoxin precursor	SF-mi2	SF-mi2 01	OK213A_TRINITY_DN761_c0_g1_i15_Frame_F3	MRFYLLLTVTLLLTLSTGGDAGPRRANGLPKHFVLRTCTDNCRPCGTSGTCCCAPKVCRHNQCRHQSKHNTWRWSDRISRRCWSGWAAGTGSA*	ATGAGATTTTACCTGCTGCTGACCGTCACGCTGCTTCTGACATTGTCCACTGGTGGTGATGCTGGACCGAGGCGTGCTAATGGCTTACCAAAACATTTCGTACTTCGTACTTGCACAGATAACTGTCGTCCATGTGGCACCTCTGGTACATGTTGTTGTGCCCCCAAGGTTTGCAGACATAACCAATGCAGGCACCAGTCAAAACACAACACCTGGCGTTGGTCAGATCGGATCAGTCGCCGGTGCTGGTCAGGTTGGGCGGCCGGCACTGGTTCTGCCTGA	1666.03	1	1
OK213_E_273	Conotoxin precursor	SF-mi2	SF-mi2 01	OK213A_TRINITY_DN761_c0_g1_i6_Frame_F3	MRFYLLLTVTLLLTLSTGGDAGPRRANGLPKHFVLRTCTGNCRLCGAICCCEPKVCRNNQCIDYK*	ATGAGATTTTACCTGCTGCTGACCGTCACGCTGCTTCTGACATTGTCCACTGGTGGTGATGCTGGACCGAGGCGTGCTAATGGCTTACCAAAACATTTCGTACTTCGTACTTGCACAGGGAACTGTCGTCTATGTGGCGCCATATGTTGTTGTGAACCCAAGGTTTGCAGAAATAACCAATGCATAGATTACAAGTGA	92506.3	1	1
OK213_E_274	Conotoxin precursor	SF-mi2	SF-mi2 01	OK213A_TRINITY_DN761_c0_g1_i8_Frame_F3	MRFYLLLTVTLLLTLSTGGDAGPRRANGLPKHFVLRTCPEDCRPCGTSRTCCCDPKVCSNNQCRLQVTEHDRLHHAAKTVSLMV*	ATGAGATTTTACCTGCTGCTGACCGTCACGCTGCTTCTGACATTGTCCACTGGTGGTGATGCTGGACCGAGGCGTGCTAATGGCTTACCAAAACATTTCGTACTTCGTACTTGCCCAGAGGACTGTCGTCCATGTGGCACCTCTCGTACATGTTGTTGTGACCCCAAGGTTTGCAGTAATAACCAATGCAGATTACAAGTGACTGAACATGACAGACTTCACCACGCGGCCAAGACAGTATCTTTGATGGTTTAA	24796.8	1	1
OK213_E_275	Conotoxin precursor	SF-mi2	SF-mi2 01	OK213A_TRINITY_DN761_c0_g1_i1_Frame_F3	AGPRRANGLPKHFVLRTCPEDCRLCGTSGTCCCDPNVCSNNQCRLPDGR*	GCTGGACCGAGGCGTGCTAATGGCTTACCAAAACATTTCGTACTTCGTACTTGCCCAGAGGACTGTCGTCTATGTGGCACCTCTGGTACATGTTGTTGTGACCCCAACGTTTGCAGTAATAACCAATGCAGGCTTCCCGACGGACGTTGA	59.3713	1	0
OK213_E_276	Conotoxin precursor	SF-mi2	SF-mi2 02	OK213A_TRINITY_DN1410_c1_g1_i5_Frame_F2	MEFRRLVTVALLLALVLSIDAEPMQGMEAEGHFVRRDCGEGCGTCGGGCCCIPDSCVDSQCQMP*	ATGGAATTTCGCCGGCTTGTGACTGTGGCGCTGCTTCTGGCTTTGGTCCTGAGTATTGATGCGGAGCCAATGCAAGGAATGGAAGCAGAAGGACATTTCGTACGTAGAGATTGCGGCGAAGGCTGTGGGACGTGCGGCGGTGGATGTTGTTGTATCCCCGACAGTTGCGTAGACAGCCAATGCCAGATGCCTTGA	95.9071	1	1
OK213_E_277	Conotoxin precursor	SF-mi2	SF-mi2 02	OK213A_TRINITY_DN1410_c1_g1_i1_Frame_F2	MEFRRLVTVALLLALVLSIDAEPMQGMEAEGHFVRRDCGEGCGTCGGGCCCIPDSCVDSQCQSHVGPN*	ATGGAATTTCGCCGGCTTGTGACTGTGGCGCTGCTTCTGGCTTTGGTCCTGAGTATTGATGCGGAGCCAATGCAAGGAATGGAAGCAGAAGGACATTTCGTACGTAGAGATTGCGGCGAAGGCTGTGGGACGTGCGGCGGTGGATGTTGTTGTATCCCCGACAGTTGCGTAGACAGCCAATGCCAGAGTCACGTGGGGCCAAACTGA	44921	1	1
OK213_E_278	Conotoxin precursor	Tand01		OK213A_TRINITY_DN110_c0_g1_i2_Frame_R2	MKSAVSMMALSMSIFTGFTMASATPDVLCITPVGQLSELCTTIGGTCAEYYHWKGKNNCSRFCECDVGVACPTDEAHAIVRGTVKRPLTHYTCEPITEFPKCEVDDVAIVNSGPGLRRVVKCICPWKYMYDGNSSHICKD*	ATGAAGTCAGCAGTCTCCATGATGGCGCTGTCTATGTCCATTTTCACTGGCTTTACGATGGCATCAGCAACACCAGACGTGCTTTGCATCACTCCGGTTGGCCAGCTTTCCGAATTGTGTACTACAATCGGCGGAACGTGTGCTGAATATTACCACTGGAAAGGTAAAAACAACTGCTCCCGTTTCTGCGAATGCGACGTCGGAGTGGCCTGCCCTACTGATGAAGCTCATGCAATCGTACGCGGCACCGTGAAACGTCCCTTGACTCATTACACGTGCGAGCCGATCACAGAATTTCCAAAATGTGAAGTGGACGATGTTGCTATAGTGAATTCTGGTCCCGGACTCCGCAGGGTGGTCAAATGCATCTGTCCCTGGAAGTACATGTATGACGGCAAT…	250.569	1	1
OK213_E_279	Conotoxin precursor	Tpra06		OK213A_TRINITY_DN232_c0_g1_i6_Frame_F2	MLSMLAWTLMTAMVVMNAHGQVCPTMTDSYARENECHYDHNLCGKEVSGSCSSLCNCKNSQECSTDSDHTITVVKRYVNNQPERKRYYTCVALSSLNECSGTQEALYVLTPEANELKSVKVLCRCPSTKVYLLARNPQRYVCTTAAQLSTRTT*	ATGCTGTCGATGCTCGCATGGACTTTGATGACAGCAATGGTGGTGATGAATGCTCATGGTCAAGTTTGCCCTACTATGACAGACAGCTATGCTAGGGAAAACGAATGTCATTATGACCATAACCTGTGCGGAAAGGAAGTGTCGGGGAGCTGCTCATCTCTGTGCAACTGTAAAAACAGCCAGGAGTGTTCCACGGACAGCGATCACACCATTACTGTCGTGAAACGTTACGTAAACAATCAACCTGAAAGGAAGAGGTATTACACGTGCGTGGCTCTTTCTTCATTAAACGAATGTTCCGGCACCCAGGAAGCCCTGTACGTTTTAACTCCTGAAGCCAACGAACTAAAAAGTGTGAAGGTTCTTTGTCGATGTCCATCTACAAAAGTGTACCTTCTC…	24.877	1	1
OK213_E_280	Conotoxin precursor	Tpra06		OK213A_TRINITY_DN232_c0_g1_i9_Frame_F2	MLSMLAWTLMTAMVVMNAHGQVCPTMTDSYTGENEEVSGSCSSRCYCKNGGRCSTDSDHTITVVQSYINGYPEKRYYTCVALSSLNECAVREKALFVLAPEAADPISVKVLCRCPFPKVYLQTGRSRPHICSYNPRRRG*	ATGCTGTCGATGCTCGCATGGACTTTGATGACAGCAATGGTGGTGATGAATGCTCATGGTCAAGTTTGCCCTACTATGACAGACAGCTATACTGGGGAAAACGAAGAAGTGTCGGGCAGCTGCTCATCTCGGTGCTACTGTAAAAACGGGGGGAGGTGTTCCACGGACAGCGATCACACCATTACTGTCGTGCAAAGTTACATAAACGGTTACCCTGAAAAGAGGTATTACACGTGCGTGGCTCTTTCTTCATTAAACGAATGTGCCGTCCGCGAGAAAGCCCTGTTCGTTTTAGCTCCTGAAGCCGCAGATCCAATAAGTGTGAAGGTTCTTTGTCGATGTCCATTTCCAAAAGTGTACCTTCAGACCGGACGTAGTCGACCTCACATCTGTTCCTAT…	63.2552	1	1
OK213_E_281	Conotoxin precursor	Tpra06		OK213A_TRINITY_DN232_c0_g1_i7_Frame_F2	MLSMLAWTLMTAMVVMNAHGQVCPTMTDSYTGENECFYDNNLCGKEVSGSCSSRCYCKNGGRCSTDSDHTITVVQSYINGYPEKRYYTCVALSSLNECAVREKALFVLAPEAADPISVKVLCRCPFPKVYLQTGRSRPHICSYNPRRRG*	ATGCTGTCGATGCTCGCATGGACTTTGATGACAGCAATGGTGGTGATGAATGCTCATGGTCAAGTTTGCCCTACTATGACAGACAGCTATACTGGGGAAAACGAATGTTTTTATGACAATAACCTGTGCGGAAAGGAAGTGTCGGGCAGCTGCTCATCTCGGTGCTACTGTAAAAACGGGGGGAGGTGTTCCACGGACAGCGATCACACCATTACTGTCGTGCAAAGTTACATAAACGGTTACCCTGAAAAGAGGTATTACACGTGCGTGGCTCTTTCTTCATTAAACGAATGTGCCGTCCGCGAGAAAGCCCTGTTCGTTTTAGCTCCTGAAGCCGCAGATCCAATAAGTGTGAAGGTTCTTTGTCGATGTCCATTTCCAAAAGTGTACCTTCAGACC…	12.4411	1	1
OK213_E_282	Conotoxin precursor	Tpra06		OK213A_TRINITY_DN232_c0_g1_i11_Frame_F2	MLSMLAWTLMTAMVVMNAHGQFCPTMTDSRPGENKCLHDNYLCGKEDDSGSCTSLCYCKSGQMCFRDNDHTITAVPRIINDRPVEITYYTCVALSSLNE	ATGCTGTCGATGCTCGCATGGACTTTGATGACAGCAATGGTGGTGATGAATGCTCATGGTCAATTTTGCCCTACTATGACAGACAGCCGTCCCGGGGAAAACAAATGTCTTCATGACAATTACCTGTGCGGAAAGGAGGACGACTCGGGGAGCTGCACATCTCTGTGCTACTGTAAAAGCGGGCAGATGTGTTTCAGGGACAACGATCACACCATTACTGCCGTGCCACGTATCATAAACGATCGCCCTGTTGAGATCACGTATTACACGTGCGTAGCTCTTTCTTCATTAAACGAA	3.8557	0	0
OK213_E_283	New putative conotoxin precursor	Virro01		OK213A_TRINITY_DN8191_c0_g1_i1_Frame_R1	MLKMPVLLLTILLLLLMATAQDDKRVQGNAAQSDHIISRQNCVQQNGVCNEAKNLSCCETSSGLTCSATGQNDRNPTCQVRHGRDE*	ATGCTGAAAATGCCAGTCCTCCTTCTCACCATCCTTCTGCTGCTGCTCATGGCAACAGCCCAGGATGACAAACGTGTCCAAGGAAACGCTGCGCAGAGTGATCACATCATATCCAGACAGAACTGCGTGCAGCAGAATGGAGTTTGTAATGAAGCTAAGAACCTTTCATGCTGCGAAACGTCCTCTGGACTCACGTGCAGTGCTACAGGTCAAAATGATAGAAACCCGACTTGCCAGGTCCGCCATGGCCGCGATGAGTGA	1.21132	1	1
OK213_E_284	Hormone	Conopressin/Conophysin	Conopressin/Conophysin-1	OK213A_TRINITY_DN615_c0_g1_i5_Frame_R2	MTRSAMQMGRLTLVLCLLLLLLLTTQACFIRNCPKGGKRDVDERQLVNACMFCSFGQCVGPHICCGDGGCQMGTPEASRCSHEDESPIPCQVIGNHCALNNPGNIHGHCVAYGICCVDDTCTTHSGCL*	ATGACGCGCTCAGCCATGCAGATGGGGCGACTGACGTTGGTGCTGTGTTTGCTGTTGCTGCTATTGCTCACTACTCAGGCTTGCTTCATCAGAAACTGCCCAAAAGGTGGCAAGAGAGATGTGGACGAAAGACAACTTGTGAATGCGTGCATGTTCTGTAGCTTTGGCCAGTGCGTGGGGCCCCATATCTGCTGTGGAGATGGAGGATGCCAAATGGGAACCCCAGAAGCGAGCAGGTGCAGCCATGAGGACGAGAGTCCTATTCCTTGCCAAGTCATTGGTAACCACTGCGCTCTTAACAACCCAGGCAACATCCACGGCCACTGTGTGGCTTATGGCATCTGCTGTGTGGATGATACTTGTACCACCCACTCGGGATGTCTGTAG	34.6902	1	1
OK213_E_285	Hormone	Conopressin/Conophysin	Conopressin/Conophysin-1	OK213A_TRINITY_DN615_c0_g1_i4_Frame_R3	MARSAMQIGRLTLVLCLLLLLLLTTQACFIRNCPPGGKSDVDERQPVNACMFCSFGQCVGPHTCCGDGGCEIGTPEANNCSHEDESPIPCQVIGDHCALNNISNIHGHCVANGTCCVDDTCTTHSGCL*	ATGGCGCGCTCAGCCATGCAGATTGGGCGACTGACGTTGGTGCTGTGTTTGCTGTTGCTGCTATTGCTCACTACTCAGGCTTGCTTCATCAGAAACTGCCCACCAGGTGGCAAGAGTGATGTGGACGAAAGACAACCTGTGAATGCGTGCATGTTCTGTAGCTTTGGCCAGTGCGTGGGGCCCCATACCTGCTGTGGAGATGGAGGATGCGAAATTGGAACCCCAGAAGCGAACAACTGCAGCCATGAGGACGAGAGTCCTATTCCTTGCCAAGTCATTGGTGACCACTGCGCTCTGAACAACATAAGCAACATCCACGGCCACTGTGTTGCTAATGGCACCTGTTGTGTGGATGATACTTGTACCACCCACTCGGGATGTCTGTAG	53.9517	1	1
OK213_E_286	Hormone	Conopressin/Conophysin	Conopressin/Conophysin-1	OK213A_TRINITY_DN615_c0_g1_i3_Frame_R3	MARSAMQIGRLTLVLCLLLLLLLTTQACFIRNCPPGGKSDVDERQPVNACMFCSFGQCVGPHTCCGDGGCEIGTPEANNCSHEDESPIPCQVIGNHCALNNPGNIHGHCVAYGICCVDDTCTTHSGCL*	ATGGCGCGCTCAGCCATGCAGATTGGGCGACTGACGTTGGTGCTGTGTTTGCTGTTGCTGCTATTGCTCACTACTCAGGCTTGCTTCATCAGAAACTGCCCACCAGGTGGCAAGAGTGATGTGGACGAAAGACAACCTGTGAATGCGTGCATGTTCTGTAGCTTTGGCCAGTGCGTGGGGCCCCATACCTGCTGTGGAGATGGAGGATGCGAAATTGGAACCCCAGAAGCGAACAACTGCAGCCATGAGGACGAGAGTCCTATTCCTTGCCAAGTCATTGGTAACCACTGCGCTCTTAACAACCCAGGCAACATCCACGGCCACTGTGTGGCTTATGGCATCTGCTGTGTGGATGATACTTGTACCACCCACTCGGGATGTCTGTAG	6.48013e-09	1	1
OK213_E_287	Hormone	Conopressin/Conophysin	Conopressin/Conophysin-2	OK213A_TRINITY_DN9538_c1_g1_i1_Frame_F1	MKCSVLQMSRLSWAMCLMLLMLLLLGTAQGCFIRNCPRGGKRAVDAMQPTRQCMSCGPEGVGQCVGPNVCCGLGLGCLMGTPETEVCQKENESSVPCAISGRRCGMDNTGNCVADGICCVEDACSFNSLCRVDTDQEDSVSARQELLTLIRRLLVNRQYD*	ATGAAGTGTTCAGTTCTGCAGATGAGCCGCCTGTCCTGGGCCATGTGTCTGATGCTGCTGATGCTGCTGCTCCTAGGAACTGCCCAGGGCTGCTTCATCAGGAACTGTCCTCGGGGCGGCAAGAGAGCGGTGGACGCCATGCAGCCTACCAGACAGTGCATGTCGTGCGGCCCGGAGGGCGTGGGCCAGTGCGTGGGACCCAACGTTTGCTGCGGACTGGGCCTGGGATGCCTGATGGGAACGCCGGAAACGGAAGTCTGTCAGAAAGAGAACGAGAGTTCCGTCCCCTGCGCGATCAGTGGTCGCCGCTGCGGCATGGACAACACGGGCAACTGTGTGGCTGATGGCATCTGCTGTGTGGAAGATGCCTGCTCGTTCAACTCGCTGTGCAGAGTGGAC…	0.676055	1	1
OK213_E_288	Hormone	Conorfamide		OK213A_TRINITY_DN248_c0_g1_i33_Frame_R2	MSGSGFLLLALLLLGTVEATKVEQEKKGMQTDQLIKFYDPLPRLGRQNMQSPLFSERLRTRALGFRQLSSQKQ*	ATGTCAGGCTCTGGATTCCTGCTACTTGCCCTGTTGCTTCTGGGGACTGTGGAAGCCACTAAAGTGGAACAGGAGAAAAAAGGAATGCAAACTGACCAGTTGATAAAGTTCTACGACCCCCTCCCAAGACTTGGCCGCCAAAATATGCAATCTCCATTATTCTCCGAACGGCTCCGAACCCGAGCGCTGGGGTTCCGACAGCTGTCGTCACAGAAACAATGA	67.6539	1	1
OK213_E_289	Hormone	Insulin-related peptide	Insulin-related peptide-1	OK213A_TRINITY_DN9160_c0_g1_i1_Frame_R2	MATGLLSPLLVAMLGFLLHVHVARAGLEHTCTLETRLQGAHPRGICGSKLPNIVHTVCQVMGRGYAGGQRQLRKRTSIIDSDDMEADEGSLGGFMMSKRRALSYLQKETNPLVMAGYERRGVQKRHGDQGITCECCYNFCSFRELVQYCN*	ATGGCCACAGGGTTGTTGTCTCCCCTGCTGGTAGCGATGCTGGGTTTCCTGTTGCACGTGCACGTGGCTCGGGCGGGTCTGGAGCACACCTGCACTCTGGAAACGCGCCTGCAAGGAGCTCACCCGCGGGGCATCTGCGGCAGCAAGCTGCCTAACATCGTCCACACCGTCTGTCAGGTCATGGGCAGGGGCTACGCGGGCGGTCAGCGTCAATTACGCAAGAGGACCTCCATAATAGATTCTGACGACATGGAGGCAGACGAAGGGAGTCTAGGTGGCTTCATGATGAGCAAGAGACGGGCGTTGTCGTACCTGCAGAAGGAGACGAACCCGCTGGTGATGGCTGGATATGAACGCAGGGGGGTACAGAAGCGACACGGAGACCAGGGGATCACCTGT…	0.52138	1	1
OK213_E_290	Hormone	Insulin-related peptide	Insulin-related peptide-3	OK213A_TRINITY_DN102_c1_g1_i1_Frame_F1	MGLLRAVCQRIAMREVTPALLALLCLLGQATGQTFCGVDSRPHPKGICGHMLLRAHRTLCFLLSADYPNIFSRSIHKRSLKNIDDFPLQTYAQMDLQGGHSQEQPTGTSPNTETMRKLFVSLFPRVQTLLPDVGDSVLTQGGPGSSKGPSGDHLQAKRAGDDLLPHVQKRGMVCDCCYNVCQPSTLAQYCP*	ATGGGACTTCTGCGAGCCGTTTGCCAACGCATTGCCATGAGGGAAGTCACGCCCGCCCTGCTCGCTCTGCTGTGCTTGCTGGGCCAGGCCACGGGACAGACCTTCTGCGGGGTGGATTCCCGGCCCCACCCCAAGGGCATCTGCGGCCACATGCTGCTGCGGGCCCATCGCACCTTGTGCTTTCTGCTGTCCGCCGACTACCCCAACATCTTCAGCCGCTCCATACACAAGCGGTCCTTGAAGAACATCGATGACTTCCCCTTGCAGACCTACGCCCAGATGGACCTGCAGGGAGGCCACTCTCAAGAGCAGCCCACGGGGACCTCCCCCAACACGGAGACCATGCGCAAGCTGTTCGTGTCGCTCTTCCCCCGTGTGCAGACCCTCCTCCCCGACGTG…	0.840791	1	1
OK213_E_291	Hormone	Insulin-related peptide	Insulin-related peptide-5	OK213A_TRINITY_DN339_c0_g1_i5_Frame_F2	MTTSSYFLLVALGLLLYVCQSSFGGEHVCGSNQPNHPNGKCGSKMADYLEEQCEEEEAAQGGTNDARATTGRALSLSKRRGFLSMLKRRGKRNEASPLQRAGRGIVCECCKNHCTDEEFTEYCPHVTESG*	ATGACGACATCGTCCTACTTTCTGCTGGTGGCCCTGGGCCTTCTGCTTTACGTGTGTCAATCTTCCTTTGGCGGCGAACATGTCTGTGGGTCTAATCAACCTAATCACCCGAACGGCAAATGTGGATCAAAAATGGCCGATTATCTCGAAGAACAGTGTGAAGAAGAGGAAGCTGCGCAAGGCGGAACAAACGACGCACGGGCGACAACAGGGCGGGCTTTGTCACTGAGTAAGCGACGGGGCTTTCTCTCCATGCTGAAGAGACGGGGCAAGAGGAATGAAGCATCTCCTCTGCAGAGAGCTGGCCGGGGAATTGTCTGTGAATGTTGTAAAAATCACTGCACTGATGAAGAATTTACCGAGTATTGTCCCCATGTCACTGAGTCCGGTTAA	5.97734	1	1
OK213_E_292	Hormone	Insulin-related peptide	Insulin-related peptide-5	OK213A_TRINITY_DN339_c0_g1_i6_Frame_F2	MTTSSYFLLVALGLLLYVCQSSFGGEHVCWLGDPNHPQGVCGPQVANIVEIRCEEKEAEQGGANNARANTGRTSSLMKRRGFLSLLKKRGKRDEGSPLQRSGRGIVCECCKHHCTKEEFTEYCH*	ATGACGACATCGTCCTACTTTCTGCTGGTGGCCCTGGGCCTTCTGCTTTACGTGTGTCAATCTTCCTTTGGCGGCGAACATGTCTGTTGGCTTGGTGACCCTAATCACCCACAAGGCGTATGTGGACCACAAGTGGCTAATATTGTCGAAATAAGATGTGAAGAAAAGGAAGCTGAGCAAGGCGGAGCAAACAACGCACGGGCGAACACAGGGCGGACTTCCTCACTGATGAAGCGACGGGGCTTTCTCTCCCTGCTGAAGAAACGGGGCAAGAGGGATGAAGGATCTCCTCTGCAGAGATCTGGCCGGGGAATTGTCTGTGAATGTTGTAAACATCACTGCACTAAAGAAGAATTTACCGAGTATTGTCACTGA	0.913671	1	1
OK213_E_293	Hormone	Insulin-related peptide	Insulin-related peptide-5	OK213A_TRINITY_DN339_c0_g1_i1_Frame_F1	MTTSSYFLLVALGLLLYVCQSSFGQEHTCEPNAPAHPQGKCGSALANYVEEMCEEEEAEHAGTNNVRKKRGRASPLRKRFLSMLKTRAKRNESFLLKRSTQGIVCECCKNHCTDEEFTEYCPHVTESG*	ATGACGACATCATCCTACTTTCTGCTGGTGGCCTTAGGCCTTCTGCTGTACGTGTGTCAGTCTTCCTTTGGCCAGGAACATACCTGCGAGCCTAACGCTCCTGCTCATCCACAGGGCAAATGTGGGTCAGCACTGGCTAACTATGTCGAAGAAATGTGTGAAGAAGAGGAAGCTGAGCATGCTGGAACAAACAACGTAAGGAAGAAGAGAGGGCGGGCTTCCCCGCTGAGGAAGCGCTTTCTCTCCATGCTGAAGACACGGGCCAAGAGGAATGAATCATTTCTTCTGAAGAGATCTACCCAGGGAATAGTCTGTGAATGTTGTAAAAATCACTGCACTGATGAAGAATTTACCGAGTATTGTCCCCATGTCACTGAGTCCGGTTAA	0.199607	1	1
OK213_E_294	Hormone	Insulin-related peptide	Insulin-related peptide-5	OK213A_TRINITY_DN339_c0_g1_i2_Frame_F1	MTTSSYFLLVALGLLLYVCQSSFGQEHTCEPNAPAHPQGKCGSALANYVEEMCEEEEAEHAGTNNVRKKRGRASPLRKRFLSMLKTRAKRNESFLLKRSTQGIVCECCNNHCTDEEFTEYCPPVTES*	ATGACGACATCGTCTTACTTTCTGCTGGTGGCCTTAGGCCTTCTGCTGTACGTGTGTCAGTCTTCCTTTGGCCAGGAACATACCTGCGAGCCTAACGCTCCTGCTCATCCACAGGGCAAATGTGGGTCAGCACTGGCTAACTATGTCGAAGAAATGTGTGAAGAAGAGGAAGCTGAGCATGCTGGAACAAACAACGTAAGGAAGAAGAGAGGGCGGGCTTCCCCGCTGAGGAAGCGCTTTCTCTCCATGCTGAAGACACGGGCCAAGAGGAATGAATCATTTCTTCTGAAGAGATCTACCCAGGGAATAGTCTGTGAATGTTGTAACAATCACTGCACTGATGAAGAATTTACCGAGTATTGTCCCCCAGTCACTGAATCATAA	20.1263	1	1
OK213_E_295	Hormone	Insulin-related peptide	Insulin-related peptide-5	OK213A_TRINITY_DN339_c0_g1_i4_Frame_F1	MTTSSYFLLVALGLLLYVCQSSFGQEHTCEPNAPAHPQGKCGSALANYVEEMCEEEEAEHAGTNNVRKKRGRASPLRKRFLSMLKTRAKRNESFLLKRSTQGIVCECCKNHCTDEEFTEYCPPVTES*	ATGACGACATCATCCTACTTTCTGCTGGTGGCCTTAGGCCTTCTGCTGTACGTGTGTCAGTCTTCCTTTGGCCAGGAACATACCTGCGAGCCTAACGCTCCTGCTCATCCACAGGGCAAATGTGGGTCAGCACTGGCTAACTATGTCGAAGAAATGTGTGAAGAAGAGGAAGCTGAGCATGCTGGAACAAACAACGTAAGGAAGAAGAGAGGGCGGGCTTCCCCGCTGAGGAAGCGCTTTCTCTCCATGCTGAAGACACGGGCCAAGAGGAATGAATCATTTCTTCTGAAGAGATCTACCCAGGGAATAGTCTGTGAATGTTGTAAAAATCACTGCACTGATGAAGAATTTACCGAGTATTGTCCCCCAGTCACTGAATCATAA	31.6328	1	1
OK213_E_296	Hormone	Prohormone-4a		OK213A_TRINITY_DN1958_c0_g1_i19_Frame_F1	MNSFYPYSAAMMPFNSFRPPMHPISYLHPPMGYPFVYPAMNTMSPYNLMHPMYNPAHPMNPANPYSPMNPVTNLAHPMNPTNPYSPMNPVTNLAHPMNPAPVTNLAHPMNPTNPYSPMNPVTNLAHPMNPANPYNPMNPVNSWYNPMNFQYPFHPPMRVASYYLTPPLGSSYLFPSNGYGHFHLAPTQAAAPLNLHMHFPYSYQAGGMYNPYMYPYQSSALYQPYGYAAGVPGAMAWNQFRGAAWNPYSAMGYGAYPMWPAQFAHMWPLHPYYQTVMPAQEGMCSYDRPFKCWGSATCIAIEAICDKNFDCNNHADEDPRICVAGRRPSYDILVSYLMLPNQHWMLQKLFNNVDPYTAAHALKLATSLGDLRWSLALTDENINNTKTVLEAVKNDNKDP…	ATGAACTCTTTCTATCCCTACTCTGCAGCTATGATGCCTTTCAACTCTTTCCGCCCTCCTATGCATCCTATTTCCTATCTCCACCCGCCTATGGGTTATCCCTTCGTCTACCCTGCCATGAACACCATGAGCCCGTACAATCTTATGCATCCCATGTACAACCCCGCCCATCCTATGAACCCTGCGAACCCCTATAGTCCTATGAATCCTGTGACCAACCTCGCCCATCCTATGAACCCTACGAACCCCTATAGTCCTATGAATCCTGTGACCAACCTCGCCCATCCTATGAACCCTGCTCCTGTGACCAACCTCGCCCATCCTATGAACCCTACGAACCCCTATAGTCCTATGAATCCTGTGACCAACCTCGCCCATCCTATGAACCCTGCGAACCCC…	1243.59	1	1
OK213_E_297	Hormone	Thyrostimulin hormone beta 5		OK213A_TRINITY_DN40298_c0_g1_i1_Frame_R1	VNPRTTLQCHVRSYTFRATKPPIINENGDLVTCQGDVHVKSCWGRCDSSEIGDFKMPFKISNHPVCTYTGRVSRTVRLSQCVGYPDPTVQVFDATGCACRFCNSDFTSCENLNG*	GTCAACCCCCGCACCACCCTGCAGTGTCACGTGCGCTCCTACACCTTCCGGGCCACCAAGCCACCAATCATCAACGAGAACGGCGACCTCGTGACCTGCCAGGGGGACGTGCACGTGAAATCCTGTTGGGGACGATGCGATTCCAGCGAGATCGGAGATTTCAAGATGCCCTTCAAGATCAGCAACCACCCGGTATGCACCTACACAGGCCGCGTCAGTCGAACTGTCAGGCTCAGTCAGTGTGTCGGGTACCCAGACCCCACGGTGCAGGTCTTTGACGCCACAGGCTGTGCCTGCCGATTCTGCAACTCGGATTTTACCAGCTGCGAAAACCTCAACGGCTGA	0.643775	1	0
OK213_E_298	Other venom-related protein	CAP-Superfamily	CAP-Superfamily-2	OK213A_TRINITY_DN1453_c1_g1_i1_Frame_F1	MVSRGHVLFVVLLPVLAQVAADDADEQMMSEVMRGDQDSVASGSGSLIRPPSNLPFIPDTPLPLPSTFLLNLLQSSNGNPRAAAAAAAARAPSEPLPGPRPESSLPSSSSSGSEYEDNEVSKRVFCNGFTGCGGRHRDRSRRQERYGKRLIPLLVKRPFCNSFGCYNGKRSLSGAGPALSTLVDPSQNYRARAIARMLAAAASARRQQQQQLLQQQEQGGLERRVLVASGALGKRLFCNGYGGCRGGKRSLFSPWMSKMSGVVADRRR*	ATGGTCTCGCGCGGTCACGTGCTGTTTGTGGTTCTGCTTCCAGTCCTGGCTCAAGTGGCTGCCGACGATGCAGATGAACAGATGATGTCCGAGGTGATGCGAGGAGACCAAGACAGCGTCGCCTCTGGCTCCGGCAGCCTGATACGACCCCCCTCCAACCTTCCCTTCATCCCCGACACCCCCCTCCCCTTACCCTCAACCTTTCTCCTAAATCTCCTCCAGTCCTCAAACGGTAACCCACGAGCAGCGGCAGCAGCAGCAGCAGCACGAGCCCCCTCAGAGCCGCTCCCTGGCCCCCGTCCGGAGTCGTCCCTGCCCTCCTCCTCCTCCTCCGGCTCTGAATACGAAGACAACGAGGTCAGCAAACGCGTCTTCTGCAACGGTTTCACAGGCTGCGGT…	NA	1	1
OK213_E_299	Other venom-related protein	Conoporin		OK213A_TRINITY_DN133_c0_g2_i16_Frame_R1	MRVPFPALKTMVTVFLLLMGNMSPVVPRSSIPLDKVKVLAYEVVTSGNSLNGVTLQDLAETEYDVTCVVQVENWTRYPLMTPRQRIANDGAWTTYPVAILPGKREAFAVRKASGVKKGVYGIVSWELLGARRRFVIMWSAPYDLNKYSNWMGLGMTREGLTDVAPGDTWFDQMYSDKSSGSLTFERKEFYHNTDPVIYRNAKFEAEGAMTNGNHAQVKIVVRPTRNNWKDLADEIRQKLV*	ATGAGGGTTCCATTCCCGGCACTGAAGACGATGGTGACTGTTTTCCTTCTGTTGATGGGGAACATGTCACCAGTTGTTCCGAGGTCTTCCATCCCTCTCGACAAGGTGAAGGTGCTTGCTTACGAAGTTGTCACTTCAGGGAATTCGCTGAATGGTGTCACTCTACAGGACTTGGCAGAGACCGAGTACGACGTTACGTGCGTCGTTCAAGTGGAGAACTGGACTCGCTACCCCTTGATGACCCCCAGACAACGGATCGCCAATGATGGGGCCTGGACCACATATCCTGTTGCCATACTACCGGGAAAGAGAGAGGCCTTTGCCGTGCGGAAGGCTTCAGGTGTGAAAAAAGGTGTGTATGGCATTGTGTCCTGGGAATTGCTTGGGGCCAGGCGACGC…	NA	1	1
OK213_E_300	Other venom-related protein	Conodipine	Conodipine-2	OK213A_TRINITY_DN391_c0_g1_i2_Frame_F2	MKMLESALWILAALALTWIVAQDSSTAELCKINSNGCSVPSALIPCQKHFLAACDIHDNCYLCGAHFGLTRNNCDNAFLTHMTALCAQGTDEGGFCLERRKRREASSMFITTTPLRQLRLLEKLMPPNSLSDHDSRQPQQRFFTCTQWAEKYFDAVRTSGSSYFSDTANATYCPQFVDCMPQV*	ATGAAGATGCTGGAATCGGCCCTGTGGATACTGGCAGCTCTGGCACTGACATGGATTGTGGCTCAGGATTCCAGTACGGCTGAGTTATGCAAGATCAACAGCAACGGTTGCAGTGTTCCTTCTGCGTTGATACCATGCCAAAAGCATTTCCTTGCCGCCTGTGACATACACGATAACTGTTACCTTTGTGGAGCGCATTTCGGCCTCACGCGGAACAACTGCGACAACGCTTTTCTCACACACATGACTGCTCTGTGTGCCCAAGGCACTGATGAGGGAGGCTTCTGCCTGGAGAGACGGAAACGAAGAGAAGCTTCCAGCATGTTCATCACCACCACCCCTCTCAGACAACTACGGCTCCTGGAGAAACTCATGCCCCCGAATTCCTTGTCGGACCAT…	NA	1	1
OK213_E_301	Other venom-related protein	Conodipine	Conodipine-2	OK213A_TRINITY_DN391_c0_g1_i3_Frame_F2	MKMLESALWILAALALTWIVAQDSSTAELCKINSNGCSVPSALIPCQKHFLAACDIHDNCYLCGAHFGLTRNNCDNAFLTHMTALCAQGTDEGGFCLERRKRREASSMFITTTPLRQLRLLEKLMPPNSLSDHDSRQPQQRFFTCTDWAKNYFDAVRISGSSYFSDTANATYCPQFVDCMPQV*	ATGAAGATGCTGGAATCGGCCCTGTGGATACTGGCAGCTCTGGCACTGACATGGATTGTGGCTCAGGATTCCAGTACGGCTGAGTTATGCAAGATCAACAGCAACGGTTGCAGTGTTCCTTCTGCGTTGATACCATGCCAAAAGCATTTCCTTGCCGCCTGTGACATACACGATAACTGTTACCTTTGTGGAGCGCATTTCGGCCTCACGCGGAACAACTGCGACAACGCTTTTCTCACACACATGACTGCTCTGTGTGCCCAAGGCACTGATGAGGGAGGCTTCTGCCTGGAGAGACGGAAACGAAGAGAAGCTTCCAGCATGTTCATCACCACCACCCCTCTCAGACAACTACGGCTCCTGGAGAAACTCATGCCCCCGAATTCCTTGTCGGACCAT…	NA	1	1
OK213_E_302	Other venom-related protein	Elevenin		OK213A_TRINITY_DN907_c0_g1_i1_Frame_F2	MAPSQKALLVLVLSMLLTASDSRARRIDCTRFVYAPICRGVAAKRGGDSLSVGASTELDDALTDPFLRSEEPREEDTEKKWRELSRLSRVLQILLSHPTGETEQLDRLLTL*	ATGGCACCGTCTCAGAAAGCGCTGCTGGTGCTGGTTCTCTCCATGCTGCTCACAGCATCAGACTCCCGGGCACGGAGAATTGACTGCACACGTTTCGTCTACGCGCCAATCTGTCGCGGCGTGGCAGCAAAGAGGGGAGGTGACTCTTTGTCTGTTGGGGCCAGCACTGAACTGGACGACGCTCTCACAGACCCCTTCTTGAGGTCGGAGGAGCCAAGGGAGGAGGACACGGAGAAGAAGTGGAGGGAATTGTCCAGACTGTCCCGAGTTCTCCAGATTCTTCTTTCCCACCCCACGGGAGAGACGGAGCAACTTGACCGACTTCTGACGTTGTAA	NA	1	1
OK213_E_303	Other venom-related protein	Elevenin		OK213A_TRINITY_DN6815_c1_g1_i1_Frame_F2	MGPSSSQNTAVVVMVMLALLLASPPVASWRIDCTRFVFAPRCRGVAAKRGDDSLSTKQSALMGDGNAQPLQRAGAGVQNRDPDTFLQLLMALAPAMPRSAPLSQRRKERLDDFLSS*	ATGGGTCCCAGCAGCTCTCAGAACACAGCGGTGGTGGTGATGGTGATGCTCGCCCTCCTCCTCGCCTCTCCCCCCGTTGCCAGCTGGCGCATCGACTGCACACGATTCGTGTTTGCGCCCAGATGTCGCGGTGTGGCCGCCAAAAGGGGAGACGACTCTCTGTCCACGAAACAGTCGGCACTGATGGGGGATGGTAACGCACAGCCCCTCCAGAGAGCAGGAGCAGGAGTGCAGAACAGAGATCCGGACACGTTCTTACAACTGCTGATGGCGCTGGCACCGGCCATGCCCCGCTCCGCCCCCCTCTCCCAGAGACGGAAGGAAAGGCTGGACGACTTTTTGTCCTCCTAA	NA	1	1
OK213_E_304	Other venom-related protein	Ferritin		OK213A_TRINITY_DN216_c0_g1_i1_Frame_R2	MAVSQCRQNYHAECEAGINRQINMELHASYCYQSMAFYFDRDDVALPGFAKFFRKSSEEEREHAEKLMTFQNQRGGRIVLQDIKKPDRDEWGSGLDAMQVALALEKSVNQSLLDLHEVATNHNDAQMTDFLEGNYLQEQVRSIKELGDYITNLKRVGPGLGEYMFDKETLQE*	ATGGCTGTCAGTCAGTGCCGTCAGAACTACCACGCCGAGTGTGAAGCTGGCATCAACCGACAGATCAACATGGAACTTCATGCCAGTTATTGCTACCAGTCCATGGCATTCTACTTTGACCGTGATGATGTAGCTCTGCCGGGGTTTGCCAAGTTCTTCAGAAAGTCATCTGAAGAGGAACGCGAGCATGCTGAGAAGCTGATGACATTCCAGAACCAGCGTGGCGGCCGTATTGTCCTGCAGGATATCAAGAAACCTGATCGGGATGAGTGGGGCTCGGGTCTGGACGCTATGCAAGTGGCGCTGGCGCTGGAGAAGAGCGTCAACCAGTCGCTGCTGGACCTGCATGAGGTGGCCACCAATCACAACGATGCCCAGATGACAGACTTCCTGGAAGGC…	NA	1	1
OK213_E_305	Other venom-related protein	Ferritin		OK213A_TRINITY_DN468_c0_g1_i1_Frame_F2	MAHNVSQCRQNYHAESEAGVNRQINMELYASYCYQSMSFYFDRDDVALPGFAKFFKEASEEEREHAEKLMKFQNKRGGRVVLQDVKKPDRDEWGTGLDAMQVALGLEKSVNQALLDLHEVAASHKDAQMTDFLEGEYLQEQVESIKKIGDHITNLKRVGTGLGEYMFDKNLS*	ATGGCCCACAACGTCAGCCAGTGCCGCCAGAACTACCACGCCGAGAGCGAGGCTGGGGTCAACAGGCAGATCAACATGGAGCTGTATGCCTCCTACTGCTATCAGTCCATGTCGTTCTACTTCGACCGTGACGACGTGGCGCTGCCAGGGTTTGCCAAGTTCTTCAAGGAGGCCTCGGAGGAGGAGCGCGAGCACGCCGAGAAGCTGATGAAGTTCCAGAACAAGCGAGGAGGCCGTGTGGTGCTTCAGGACGTCAAGAAGCCTGACCGTGACGAGTGGGGCACAGGACTGGACGCCATGCAGGTGGCCCTGGGGCTGGAGAAGAGCGTCAACCAGGCCCTGCTGGACCTGCATGAGGTCGCCGCCAGCCACAAGGACGCCCAGATGACGGACTTCCTG…	NA	1	1
OK213_E_306	Other venom-related protein	Ferritin		OK213A_TRINITY_DN468_c0_g1_i2_Frame_F2	MAHNVSQCRQNYHAESEAGVNRQINMELYASYCYQSMSFYFDRDDVALPGFAKFFKEASEEEREHAEKLMKFQNKRGGRVVLQDVKKPDRDEWGTGLDAMQVALGLEKSVNQALLDLHQVAMNHDDAQMTDF	ATGGCCCACAACGTCAGCCAGTGCCGCCAGAACTACCACGCCGAGAGCGAGGCTGGGGTCAACAGGCAGATCAACATGGAGCTGTATGCCTCCTACTGCTATCAGTCCATGTCGTTCTACTTCGACCGTGACGACGTGGCGCTGCCAGGGTTTGCCAAGTTCTTCAAGGAGGCCTCGGAGGAGGAGCGCGAGCACGCCGAGAAGCTGATGAAGTTCCAGAACAAGCGAGGAGGCCGTGTGGTGCTTCAGGACGTCAAGAAGCCTGACCGTGACGAGTGGGGCACAGGACTGGACGCCATGCAGGTGGCCCTGGGACTGGAGAAGAGCGTCAACCAGGCGCTCCTGGACCTCCACCAGGTCGCCATGAACCACGACGACGCCCAGATGACGGACTTC	NA	0	0
OK213_E_307	Other venom-related protein	Ferritin		OK213A_TRINITY_DN3535_c0_g1_i1_Frame_R3	LQTVKKPDRDDWGSGLEALQAALQLEKSINQSMLELHQCASCHNDPQMSDFVEDSFLKEQVETIKEISDYITNLKRVGTGLGEFIFDKETLQEKQE*	CTGCAGACCGTGAAGAAGCCGGACCGTGACGACTGGGGCAGCGGACTGGAGGCCCTGCAGGCGGCCCTGCAGCTGGAGAAGTCCATCAACCAGTCCATGCTGGAACTGCACCAGTGTGCCAGCTGTCATAATGACCCTCAGATGAGCGACTTTGTGGAGGACAGCTTCCTCAAGGAGCAAGTGGAGACCATCAAAGAGATCAGCGACTACATCACCAACCTTAAGCGAGTGGGCACAGGACTGGGCGAGTTCATCTTCGACAAGGAAACCCTGCAGGAAAAACAGGAGTGA	NA	1	0
OK213_E_308	Other venom-related protein	Kazal protease inhibitor	Kazal protease inhibitor-1	OK213A_TRINITY_DN4462_c0_g1_i2_Frame_F1	MQTVLCVFLIALALVHGNAWTEEKCNRPCTKEYSPHCLTFQKTVSNKCAGDIEICKMRAQGYTVTSGTNGTCTCSPICTMEYDPVCAMDLDTKTTTKFGNPCGLNLAVCQGKRMGEVPLNTCPELYE*	ATGCAGACCGTCCTGTGTGTGTTCCTTATTGCCCTTGCACTGGTGCACGGCAATGCATGGACAGAGGAGAAGTGTAACAGACCTTGTACCAAGGAGTATTCACCCCATTGTCTGACGTTCCAGAAGACTGTGTCCAACAAGTGTGCAGGAGACATTGAAATCTGCAAGATGAGAGCACAGGGATACACCGTGACCTCCGGCACTAACGGCACCTGTACCTGCAGCCCCATCTGTACGATGGAGTACGATCCTGTGTGTGCCATGGACCTGGACACTAAAACCACCACAAAGTTCGGCAACCCGTGTGGTCTCAACCTGGCAGTCTGCCAAGGAAAGAGGATGGGAGAGGTGCCCCTGAACACGTGTCCTGAACTTTATGAATGA	NA	1	1
OK213_E_309	Other venom-related protein	Kazal protease inhibitor	Kazal protease inhibitor-1	OK213A_TRINITY_DN42508_c0_g1_i1_Frame_F1	VEICRMRAQGFVKTDTRNKTCECAIGCTMNYDPVCSRDLDTNETKEYGNACALRAECEPKRLVKVDLDECD*	GTGGAAATCTGCAGAATGAGAGCGCAGGGATTCGTGAAGACCGACACCAGGAACAAGACCTGTGAGTGTGCCATCGGCTGTACGATGAATTACGATCCTGTGTGTAGCCGGGACCTGGACACGAACGAAACCAAAGAGTATGGCAACGCATGTGCACTCAGGGCTGAATGCGAACCAAAAAGGTTGGTAAAGGTGGATCTGGACGAGTGTGACTGA	NA	1	0
OK213_E_310	Other venom-related protein	Kazal protease inhibitor	Kazal protease inhibitor-2	OK213A_TRINITY_DN4591_c0_g1_i1_Frame_R2	MKTYCLLLVLLVGVAIQVEGQLDNKCPMICTMNYAPVCGSDGETYSNECMLRTKSCMSGRSITVLHNGQC*	ATGAAGACATACTGTCTGCTTCTTGTGCTTTTGGTGGGCGTGGCCATCCAAGTGGAGGGTCAGCTGGACAACAAGTGCCCGATGATATGCACCATGAATTACGCCCCTGTCTGTGGCTCCGACGGGGAGACCTACTCCAACGAGTGCATGCTGAGAACCAAGTCTTGCATGAGCGGAAGATCCATTACAGTCCTCCACAATGGACAATGCTAA	NA	1	1
OK213_E_311	Other venom-related protein	Neuropeptide F		OK213A_TRINITY_DN2760_c0_g1_i1_Frame_F2	MHKALLSALLVISLVVAQMTCVHSLRRPQRPARFTSAAQLRRYLRALNQYYAIVGRPRFGRNVDSNKKSVKDLGDLKPNE*	ATGCACAAAGCTCTGCTGTCTGCCTTGTTAGTCATCTCCCTTGTGGTGGCGCAGATGACGTGTGTTCACTCTTTGCGTCGCCCTCAGAGGCCCGCGCGATTTACGTCTGCCGCGCAATTGCGTAGATACCTCAGGGCCCTCAATCAATACTATGCCATTGTTGGCCGACCCAGGTTCGGACGCAATGTCGACTCCAACAAGAAATCAGTGAAAGACCTTGGTGACCTCAAACCTAATGAGTAA	NA	1	1
OK213_E_312	Other venom-related protein	Neuropeptide F		OK213A_TRINITY_DN2760_c0_g1_i4_Frame_F2	MHKALLSALLVISLVVAEVTCQEAMLAPPDRPQEFRSPGELRRYLKALNEYYAIVGRPRFGRSVNTNKRSVEELGDLKSDE*	ATGCACAAAGCTCTGCTGTCTGCCTTGTTAGTCATCTCCCTTGTGGTGGCGGAAGTGACGTGTCAGGAAGCGATGCTGGCGCCCCCTGACAGGCCCCAAGAGTTCCGGAGTCCCGGGGAACTCCGGCGCTACCTCAAGGCCCTCAATGAGTACTACGCCATCGTGGGCCGACCCAGGTTCGGACGCAGTGTCAACACCAACAAGAGATCAGTGGAAGAACTTGGTGACCTCAAATCTGATGAGTAG	NA	1	1
OK213_E_313	Other venom-related protein	PPI		OK213A_TRINITY_DN32418_c0_g1_i1_Frame_F2	MASACALSRLCARAVSSGANTFYGTRFSSKCMFVRFCSQKSGRPRVYFDMTADGETLGRIEFELFSDVVPKTAENFRALCTGEKGFGYKKSAFHRVIPSFMCQGGDFTRGNGTGGKSIYGNKFDDENFDLKHNKPGLLSMANAGPNTNGSQFFITTVVTSWLDGGHVVFGEVAKGMEVVKQIEKLGSESGRTKKKIEIDDCGEL*	ATGGCGTCAGCATGTGCCCTTTCCCGCCTATGTGCGCGCGCAGTGTCATCAGGCGCGAACACTTTCTATGGAACTCGGTTTTCGTCAAAATGCATGTTCGTCCGATTCTGCTCGCAGAAGTCAGGAAGACCTCGTGTTTATTTTGACATGACAGCTGATGGTGAAACACTGGGAAGAATAGAATTTGAGTTATTTTCTGATGTTGTCCCCAAAACAGCAGAGAATTTCCGTGCTCTCTGTACGGGTGAAAAAGGTTTTGGATACAAGAAGTCTGCTTTCCATCGTGTCATTCCTAGCTTCATGTGCCAGGGAGGTGACTTCACACGGGGTAATGGAACTGGGGGCAAGAGCATTTATGGCAACAAGTTTGATGATGAGAACTTCGATTTAAAACATAAC…	NA	1	1
OK213_E_314	Other venom-related protein	PPI	PPI-A	OK213A_TRINITY_DN93_c0_g1_i1_Frame_R3	MANPRCFFDIQIDGKPVGRIVMELRADVVPKTAENFRALCTGEKGFGYKGSSFHRVIPDFMCQGGDFTKHNGTGGKSIYGEKFADENFQLKHTGPGILSMANAGANTNGSQFFLCTAKTAWLDGKHVVFGSVVEGMEVVKKIEGVGSQSGKTSKKVVIDNCGQL*	ATGGCCAATCCTCGGTGTTTCTTCGATATTCAAATAGACGGCAAACCTGTCGGAAGAATTGTCATGGAGTTGCGGGCCGATGTGGTTCCGAAAACAGCGGAGAACTTCAGAGCCCTGTGCACTGGGGAGAAAGGATTTGGCTACAAAGGATCATCCTTTCATCGAGTCATTCCTGACTTCATGTGTCAGGGAGGTGATTTTACAAAACACAATGGCACTGGTGGCAAGAGCATCTATGGTGAGAAGTTCGCTGATGAGAACTTCCAGCTGAAGCACACTGGACCAGGAATTCTTTCCATGGCAAATGCTGGTGCCAACACCAATGGCTCCCAGTTCTTCCTCTGCACTGCAAAAACAGCATGGCTGGATGGCAAGCACGTGGTGTTTGGCAGTGTGGTG…	NA	1	1
OK213_E_315	Other venom-related protein	PPI	PPI-A	OK213A_TRINITY_DN93_c0_g1_i10_Frame_R3	MANPRCFFDIQIDGKPVGRIVMELRADVVPKTAENFRALCTGEKGFGYKGSSFHRVIPDFMCQGGDFTKHNGTGGKSIYGEKFADENFQLKHTGPGILSMANAGANTNGSQFFLCTAKTAWLDGKHVVFGSVVEGMDVVKQVEGVGSQSGKTSKKVMIADCGQL*	ATGGCCAATCCTCGGTGTTTCTTCGATATTCAAATAGACGGCAAACCTGTCGGAAGAATTGTCATGGAGTTGCGGGCCGATGTGGTTCCGAAAACAGCGGAGAACTTCAGAGCCCTGTGCACTGGGGAGAAAGGATTTGGCTACAAAGGATCATCCTTTCATCGAGTCATTCCTGACTTCATGTGTCAGGGAGGTGATTTTACAAAACACAATGGCACTGGTGGCAAGAGCATCTATGGTGAGAAGTTCGCTGATGAGAACTTCCAGCTGAAGCACACTGGACCAGGAATTCTTTCCATGGCAAATGCTGGTGCCAACACCAATGGCTCCCAGTTCTTCCTCTGCACTGCAAAAACAGCATGGCTGGATGGCAAGCACGTGGTGTTTGGCAGTGTGGTG…	NA	1	1
OK213_E_316	Other venom-related protein	PPI	PPI-A	OK213A_TRINITY_DN93_c0_g1_i5_Frame_R1	MSNPKCFFDMTIGGSPAGRIVMELRADVVPKTAENFRALCTGEKGFGYKGSSFHRVIPNFMCQGGDFTNHNGTGGKSIYGNKFEDENFQLKHTGPGVLSMANAGPGTNGSQFFLCTVKTEWLDGKHVVFGSVVEGMEVVKKIEGVGSQSGKTSKKVVIDNCGQL*	ATGAGCAACCCTAAATGCTTCTTCGATATGACGATTGGCGGCAGCCCGGCAGGAAGGATTGTTATGGAGTTACGAGCTGATGTGGTTCCTAAAACAGCAGAGAACTTCAGAGCCCTGTGCACTGGGGAGAAAGGATTTGGCTACAAAGGATCATCCTTTCATCGAGTCATTCCTAATTTCATGTGCCAGGGAGGTGATTTTACAAACCACAATGGCACTGGTGGGAAGAGCATCTACGGAAACAAATTTGAAGATGAGAACTTCCAGCTGAAACACACTGGACCAGGAGTCCTTTCCATGGCGAATGCCGGTCCCGGTACCAATGGCTCCCAGTTCTTCCTCTGCACTGTCAAGACTGAATGGCTGGATGGCAAGCACGTGGTGTTTGGCAGTGTGGTG…	NA	1	1
OK213_E_317	Other venom-related protein	PPI	PPI-A	OK213A_TRINITY_DN93_c0_g1_i4_Frame_R1	MSNPKCFFDMTIGGSPAGRIVMELRADVVPKTAENFRALCTGEKGFGYKGSSFHRVIPNFMCQGGDFTNHNGTGGKSIYGEKFADENFQLKHTGPGILSMANAGANTNGSQFFLCTAKTAWLDGKHVVFGSVVEGMDVVKQVEGVGSQSGKTSKKVMIADCGQL*	ATGAGCAACCCTAAATGCTTCTTCGATATGACGATTGGCGGCAGCCCGGCAGGAAGGATTGTTATGGAGTTACGAGCTGATGTGGTTCCTAAAACAGCAGAGAACTTCAGAGCCCTGTGCACTGGGGAGAAAGGATTTGGCTACAAAGGATCATCCTTTCATCGAGTCATTCCAAATTTCATGTGCCAGGGAGGTGATTTTACAAACCACAATGGCACTGGTGGCAAGAGCATCTATGGTGAGAAGTTCGCTGATGAGAACTTCCAGCTGAAGCACACTGGACCAGGAATTCTTTCCATGGCAAATGCTGGTGCCAACACCAATGGCTCCCAGTTCTTCCTCTGCACTGCAAAAACAGCATGGCTGGATGGCAAGCACGTGGTGTTTGGCAGTGTGGTG…	NA	1	1
OK213_E_318	Other venom-related protein	PPI	PPI-B	OK213A_TRINITY_DN12_c0_g1_i1_Frame_F2	MLASGIVLILLVHAFALADDKPKGPKVTEKVYFDIEIGGKAAGRIVIGLFGKTVPKTVENFKQLAIGEKEQDGKKLTYKGSKFHRVIKDFMIQGGDFTRGDGTGGRSIYGEKFPDENFKLKHYGSGWLSMANSGKDTNGSQFFITTKKTSWLDGRHVVFGTVLEGMDVVRKIEASKTDARDKPEKDVVIADCGALEVTKQFSVEKSDAPE*	ATGTTAGCAAGTGGAATTGTGCTCATTTTGCTTGTGCATGCTTTTGCACTTGCTGATGACAAACCTAAAGGGCCCAAAGTGACCGAAAAGGTTTATTTTGACATTGAAATAGGGGGCAAGGCAGCTGGGCGCATCGTCATCGGACTGTTTGGCAAAACTGTACCAAAAACTGTTGAGAATTTCAAGCAGTTAGCCATAGGAGAAAAGGAACAAGATGGCAAGAAACTTACCTACAAAGGCAGCAAATTCCACAGAGTGATCAAAGATTTCATGATTCAAGGAGGAGATTTCACCAGGGGTGATGGGACCGGTGGCCGCAGTATCTATGGGGAAAAGTTCCCTGATGAGAACTTCAAGCTGAAGCACTACGGATCTGGCTGGCTGTCCATGGCCAACTCC…	NA	1	1
OK213_E_319	Other venom-related protein	PPI	PPI-C	OK213A_TRINITY_DN19515_c0_g1_i1_Frame_R1	MAAITTQTRMQPPNITVETTMGVFVLEMYWKHAPTTCRNFVELCRRGYYNGVKFHRIIQDFMIQGGDPTGTGRGGSSIYGKNFNDEISEDLKHTGAGILSMANSGPDTNGSQFFITLAPTQWLDGKHTIFGRVSSGMTVVQRMGLVETDSNDRPLDDVKIVKSYPTLT*	ATGGCGGCAATCACAACGCAGACGAGAATGCAACCTCCAAATATTACTGTGGAAACAACAATGGGTGTGTTTGTCTTGGAAATGTACTGGAAACATGCGCCCACTACATGTCGGAACTTTGTGGAGTTGTGCCGAAGAGGTTACTACAATGGAGTCAAGTTCCACAGGATCATCCAGGATTTCATGATCCAAGGAGGCGACCCCACTGGCACAGGAAGAGGTGGCTCATCTATTTATGGCAAGAACTTCAACGATGAAATTTCTGAAGATTTGAAACACACGGGAGCAGGGATTCTGTCCATGGCCAACAGCGGGCCCGACACCAATGGCAGTCAGTTCTTCATCACACTGGCCCCCACACAGTGGCTGGACGGGAAGCACACCATCTTTGGGCGAGTC…	NA	1	1
OK213_E_320	Other venom-related protein	PPI	PPI-E	OK213A_TRINITY_DN1733_c0_g1_i1_Frame_F1	MASSANNKRMVYVGGLAEEVDDKVLHAAFLPFGDIVDVQIPLDYETEKHRGFAFIEFELAEDAAAAIDNMNESELFGRTIRVNLAKPMKVKEGASRAVWADDNWLQKHAGETLEESQDKEEEEESNKRPAEDDSEADSGASAAKRSRPAGNPQVYMDIKIGSRGVGRLVMELRADVVPKTAENFRCLCTYEKGYGFRGSSFHRIIPQFMCQGGDFTNHNGTGGKSIYGKKFEDENFQLRHTAAGDLSMANSGPNTNGSQFFITTAKTDWLDGKHVVFGRVTEGMDVVYKMEKCGTKGGKPTEKVTIAGCGELV*	ATGGCATCCTCTGCAAATAACAAGCGCATGGTCTACGTTGGTGGCTTAGCAGAAGAGGTTGACGACAAAGTGTTGCATGCAGCTTTCCTGCCGTTTGGTGACATAGTGGATGTTCAGATCCCATTGGATTATGAAACAGAAAAGCACAGAGGATTTGCATTCATTGAATTCGAACTGGCAGAAGATGCTGCAGCTGCCATTGACAACATGAATGAGTCAGAGCTGTTTGGTCGTACGATCCGTGTCAATCTGGCAAAGCCAATGAAGGTCAAAGAAGGAGCTTCAAGAGCAGTATGGGCTGATGACAACTGGCTTCAGAAACACGCAGGGGAAACTCTGGAAGAAAGCCAAGATAAAGAGGAGGAAGAAGAGTCCAACAAGAGGCCAGCGGAGGATGAT…	NA	1	1
[truncated: 13 more rows]

## Sheet: CebrOK014 (ebraeus)
Sequence code	Category	Superfamily	Paralog group	TRINITY CDS name	Transcript	CDS	tpm	Presence of stop codon	Completeness
CebrOK014_E_001	Conotoxin precursor	A	A-1	CebrOK014_TRINITY_DN241_c0_g1_i3_Frame_F1	MGMRMTFTVFLLVVLATAVVSFTSARASGGRNTAARAFHRTARIGACCFIKECAVSYPEECKDGFQTLAPPYVKRDVPPSA*	ATGGGCATGCGGATGACGTTCACCGTATTTCTGTTGGTTGTCTTGGCAACTGCTGTCGTTTCCTTCACTTCAGCTCGTGCATCTGGTGGCAGGAATACCGCAGCCAGAGCGTTTCACCGGACCGCTCGGATCGGGGCATGCTGTTTCATTAAAGAATGTGCAGTAAGTTATCCAGAAGAGTGTAAAGATGGATTTCAGACGCTCGCACCACCATACGTGAAACGCGACGTGCCGCCCTCTGCCTGA	1125.41	1	1
[truncated: 146 more rows]

## Sheet: CebrOK016 (ebraeus)
Sequence code	Category	Superfamily	Paralog group	TRINITY CDS name	Transcript	CDS	tpm	Presence of stop codon	Completeness
[truncated: 159 more rows]

[truncated: 7 more sheets: MAP17 (ebraeus), OK005A (judeus), OK212A (judeus), OK214A (judeus), CebrOK033 (judeus), CebrOK035 (judeus), Commons]
