# Supplementary material for: Comparative Venomics of the Cryptic Cone Snail Species Virroconus ebraeus and Virroconus judaeus
Source: Mar Drugs. 2022 Feb 17;20(2):149. doi: 10.3390/md20020149 (PMC8875821; doi:10.3390/md20020149)
Supplement: Supplementary file 1 [file marinedrugs-20-00149-s001.zip › Supplementary Table S2.xlsx]

## Sheet: Superfamilies
Supplementary Table S2. Tables with superfamily expression counts and differential expression input matrix
Superfamily distribution of conotoxin precursors and hormones in the ebraeus judaeus specimens. Values below 5 are highlighted in clear red.
	OK006	OK193	OK213	CebrOK014	CebrOK016	MAP17	OK005	OK212	OK214	CebrOK033	CebrOK035
A	4	7	6	2	2	9	2	3	2	2	5
A2	0	0	0	0	0	0	0	1	1	1	1
B1	5	2	5	1	1	2	8	8	5	7	11
B2	7	9	8	3	5	7	4	5	3	2	7
C	1	3	2	0	1	1	1	1	1	0	2
Cerm01	0	0	1	0	1	0	1	1	1	1	1
Cerm02	1	1	2	0	2	3	1	1	0	1	1
Cerm03	11	9	9	5	3	7	34	26	22	12	14
Cerm04	1	0	0	0	0	0	2	0	0	0	0
Cerm06	2	2	2	0	0	1	0	1	2	2	0
Cerm08	4	3	3	1	0	0	3	5	4	3	5
Cerm10	5	2	3	3	3	3	1	2	2	2	4
Cerm11	3	1	1	0	0	0	4	2	1	4	4
Cerm16	0	0	0	0	0	0	1	0	0	0	0
Con-ikot-ikot	5	2	4	1	2	4	4	6	7	6	5
Conkunitzin	7	4	8	1	1	5	2	8	10	3	2
Conopressin/Conophysin	3	3	4	0	1	2	1	2	2	2	1
Conorfamide	0	1	1	0	0	1	0	1	1	0	1
Cver01	0	1	0	0	0	1	1	1	1	1	2
Cver02	1	1	1	0	0	1	1	0	1	0	1
Cver03	0	0	0	0	0	2	0	1	0	0	0
Cver04	1	0	1	0	0	0	1	2	1	1	1
Cver05	0	0	0	0	0	0	2	0	0	0	0
Cver06	2	2	1	1	0	1	0	1	1	0	1
Cver07	0	0	0	0	0	0	0	0	1	0	0
D	3	2	2	1	0	2	6	5	4	5	4
Divergent-MKLCVVIVLL	0	0	0	0	0	1	0	0	0	0	0
Divergent-MRFYIGLMAA	0	0	0	0	0	1	0	0	0	0	0
E	1	3	3	0	0	2	4	2	2	1	1
F	19	5	4	2	1	2	3	8	13	1	2
Ggeo01	7	7	6	3	3	6	10	8	8	9	8
Ggeo03	3	2	3	1	1	1	1	2	3	2	4
H	3	6	8	3	3	4	7	2	5	9	8
I1	4	2	6	4	6	2	7	5	5	6	6
I2	7	1	7	4	4	5	6	17	7	4	4
I3	3	4	3	2	2	2	2	4	2	2	5
I4	1	0	3	0	1	1	2	1	2	1	3
Insulin-related-peptide	1	2	7	2	2	3	3	2	5	4	4
J	3	0	3	4	4	1	3	2	3	6	5
K	1	1	2	0	0	2	1	1	2	1	1
L	1	0	1	1	1	2	0	1	0	0	0
M	41	65	59	28	30	32	43	53	44	28	45
N	0	4	2	0	1	4	2	4	3	2	2
O1	26	18	29	18	18	22	39	28	27	29	47
O2	29	18	27	14	18	20	31	15	34	26	34
O3	5	4	5	1	3	2	3	3	5	6	8
P	4	3	4	2	2	4	2	4	2	3	7
Pmag01	0	0	0	0	0	1	0	1	0	0	0
Pmag02	2	5	6	1	1	6	4	3	4	2	7
Prohormone-4a	1	1	1	1	1	2	1	4	2	1	5
Q	1	5	5	4	3	7	4	4	7	4	6
Rimp01	2	1	2	1	1	2	1	2	4	2	2
Rimp02	0	0	1	0	0	0	0	0	1	1	1
Rimp03	0	1	0	0	0	0	0	0	0	0	0
Rimp05	0	1	1	1	0	1	0	0	1	0	3
SF-mi1	3	1	2	1	0	4	3	2	3	3	3
SF-mi2	16	7	6	4	4	6	5	2	5	4	4
S	0	1	0	0	0	0	2	0	1	1	2
T	12	14	15	9	8	18	18	10	18	19	26
Tand01	1	1	1	0	0	1	1	1	1	1	4
Thyrostimulin-hormone-beta-5	0	0	1	0	0	0	0	0	0	0	0
Tpra06	3	4	4	2	1	2	3	2	8	1	3
U	0	2	3	2	1	3	3	4	2	2	4
Virro01	1	0	1	0	1	0	0	0	0	0	0
Virro02	0	0	0	0	0	0	0	1	1	0	0
Virro03	0	0	0	1	0	0	0	0	0	1	0
V	0	0	1	0	1	2	1	2	1	1	4
Y	2	1	1	1	1	1	1	1	2	1	2

## Sheet: Presence_absence
Superfamily distribution of conotoxin precursors and hormones in the ebraeus judaeus specimens. Values equal to 0 are highlighted in clear red.
	OK006	OK193	OK213	CebrOK014	CebrOK016	MAP17	OK005	OK212	OK214	CebrOK033	CebrOK035
A	1	1	1	1	1	1	1	1	1	1	1
A2	0	0	0	0	0	0	0	1	1	1	1
B1	1	1	1	1	1	1	1	1	1	1	1
B2	1	1	1	1	1	1	1	1	1	1	1
C	1	1	1	0	1	1	1	1	1	0	1
Cerm01	0	0	1	0	1	0	1	1	1	1	1
Cerm02	1	1	1	0	1	1	1	1	0	1	1
Cerm03	1	1	1	1	1	1	1	1	1	1	1
Cerm04	1	0	0	0	0	0	1	0	0	0	0
Cerm06	1	1	1	0	0	1	0	1	1	1	0
Cerm08	1	1	1	1	0	0	1	1	1	1	1
Cerm10	1	1	1	1	1	1	1	1	1	1	1
Cerm11	1	1	1	0	0	0	1	1	1	1	1
Cerm16	0	0	0	0	0	0	1	0	0	0	0
Con-ikot-ikot	1	1	1	1	1	1	1	1	1	1	1
Conkunitzin	1	1	1	1	1	1	1	1	1	1	1
Conopressin/Conophysin	1	1	1	0	1	1	1	1	1	1	1
Conorfamide	0	1	1	0	0	1	0	1	1	0	1
Cver01	0	1	0	0	0	1	1	1	1	1	1
Cver02	1	1	1	0	0	1	1	0	1	0	1
Cver03	0	0	0	0	0	1	0	1	0	0	0
Cver04	1	0	1	0	0	0	1	1	1	1	1
Cver05	0	0	0	0	0	0	1	0	0	0	0
Cver06	1	1	1	1	0	1	0	1	1	0	1
Cver07	0	0	0	0	0	0	0	0	1	0	0
D	1	1	1	1	0	1	1	1	1	1	1
Divergent-MKLCVVIVLL	0	0	0	0	0	1	0	0	0	0	0
Divergent-MRFYIGLMAA	0	0	0	0	0	1	0	0	0	0	0
E	1	1	1	0	0	1	1	1	1	1	1
F	1	1	1	1	1	1	1	1	1	1	1
Ggeo01	1	1	1	1	1	1	1	1	1	1	1
Ggeo03	1	1	1	1	1	1	1	1	1	1	1
H	1	1	1	1	1	1	1	1	1	1	1
I1	1	1	1	1	1	1	1	1	1	1	1
I2	1	1	1	1	1	1	1	1	1	1	1
I3	1	1	1	1	1	1	1	1	1	1	1
I4	1	0	1	0	1	1	1	1	1	1	1
Insulin-related-peptide	1	1	1	1	1	1	1	1	1	1	1
J	1	0	1	1	1	1	1	1	1	1	1
K	1	1	1	0	0	1	1	1	1	1	1
L	1	0	1	1	1	1	0	1	0	0	0
M	1	1	1	1	1	1	1	1	1	1	1
N	0	1	1	0	1	1	1	1	1	1	1
O1	1	1	1	1	1	1	1	1	1	1	1
O2	1	1	1	1	1	1	1	1	1	1	1
O3	1	1	1	1	1	1	1	1	1	1	1
P	1	1	1	1	1	1	1	1	1	1	1
Pmag01	0	0	0	0	0	1	0	1	0	0	0
Pmag02	1	1	1	1	1	1	1	1	1	1	1
Prohormone-4a	1	1	1	1	1	1	1	1	1	1	1
Q	1	1	1	1	1	1	1	1	1	1	1
Rimp01	1	1	1	1	1	1	1	1	1	1	1
Rimp02	0	0	1	0	0	0	0	0	1	1	1
Rimp03	0	1	0	0	0	0	0	0	0	0	0
Rimp05	0	1	1	1	0	1	0	0	1	0	1
SF-mi1	1	1	1	1	0	1	1	1	1	1	1
SF-mi2	1	1	1	1	1	1	1	1	1	1	1
S	0	1	0	0	0	0	1	0	1	1	1
T	1	1	1	1	1	1	1	1	1	1	1
Tand01	1	1	1	0	0	1	1	1	1	1	1
Thyrostimulin-hormone-beta-5	0	0	1	0	0	0	0	0	0	0	0
Tpra06	1	1	1	1	1	1	1	1	1	1	1
U	0	1	1	1	1	1	1	1	1	1	1
Virro01	1	0	1	0	1	0	0	0	0	0	0
Virro02	0	0	0	0	0	0	0	1	1	0	0
Virro03	0	0	0	1	0	0	0	0	0	1	0
V	0	0	1	0	1	1	1	1	1	1	1
Y	1	1	1	1	1	1	1	1	1	1	1

## Sheet: Counts
Sum of est_counts generated by Kallisto per Superfamily. Values equal to 0 are highlighted in red
	OK006	OK193	OK213	CebrOK014	CebrOK016	MAP17	OK005	OK212	OK214	CebrOK033	CebrOK035
A	165	1246	915	58	30	186	32	123	807	180	269
A2	0	0	0	0	0	0	0	10	77	179	2
B1	1002	445039	323216	48	19	5226	339656	268077	358190	44652	7314
B2	1.07658e+06	1.64412e+06	2.24203e+06	3414	12940	835279	1.04594e+06	1.43076e+06	1.61279e+06	141630	19977
C	27	3619	47112	0	1256	32	15	602	218	0	28
Cerm01	0	0	4	0	27	0	114	1782	2153	643	3439
Cerm02	2	111	3966	0	9	65	71487	40	0	1268	1825
Cerm03	2861	313684	114459	113	111	687	3.33723e+06	4.45634e+06	2.83799e+06	577623	4073
Cerm04	11	0	0	0	0	0	66	0	0	0	0
Cerm06	46	28	239	0	0	15	0	60	159	60	0
Cerm08	170741	18822	97	7	0	0	102	294649	225542	1968	540
Cerm10	1381	134823	142985	191	199	1709	66610	18829	22285	1361	1472
Cerm11	85.8799	11.0023	958.947	0	0	0	66266.6	65927	51519.5	120	309
Cerm16	0	0	0	0	0	0	812.614	0	0	0	0
Con-ikot-ikot	985967	560911	959386	940	5804	293431	64143	182578	125712	3424	3170
Conkunitzin	148	19552	2783	101	43	337	85994	254489	167447	9811	465
Conopressin/Conophysin	628	1245	1868	0	27	248	27537	43431	102053	926	686
Conorfamide	0	237	469	0	0	29	0	8	9	0	59
Cver01	0	38	0	0	0	11	63	159	1184	58	52
Cver02	30	23462	3389	0	0	40	458	0	1463	0	561
Cver03	0	0	0	0	0	17	0	14	0	0	0
Cver04	19	0	11	0	0	0	67432	32499	27038	3462	3282
Cver05	0	0	0	0	0	0	7	0	0	0	0
Cver06	92	1279	16	21	0	113	0	49842	35971	0	246
Cver07	0	0	0	0	0	0	0	0	401	0	0
D	43.9999	2691	9723	9	0	339	19851	62062	20904	1219	405
Divergent-MKLCVVIVLL	0	0	0	0	0	14	0	0	0	0	0
Divergent-MRFYIGLMAA	0	0	0	0	0	42	0	0	0	0	0
E	92	48	122	0	0	36	83316	3939	45446	1876	2897
F	813039	533592	753284	1283	5203	252661	117462	32033	8787	432	121
Ggeo01	287467	113573	75089	74	1470	38381	122909	181334	175998	20045	3421
Ggeo03	87938	24626	23767	34	331	2537	117261	508004	451160	1831	1938
H	138	49515	29046	27	22	412	20119	65	6677	174	1950
I1	560	28069	55590	59	143	1132	87939	23450	26920	2558	1990
I2	94493	44200	355641	262	899	57179	835371	1.74715e+06	1.49527e+06	158080	576
I3	109623	100502	327698	1862	6265	149897	3750	23775	12228	1018	516
I4	21	0	18	0	3	14	33636	29006	20630	4534	7162
Insulin-related-peptide	0	0	46	0	0	13	0	0	0	9	0
J	355	0	191	71.0001	34	1321	170	81465	225949	31467	221
K	9	56	169	0	0	36	70	1219	2601	117	4
L	720	0	721	81	30	386	0	57	0	0	0
M	499306	1.05607e+06	922484	6128	22775	303304	483412	1.23592e+06	1.31545e+06	135628	14989
N	0	343	207	0	4	143	535	163.652	3983.03	2943	47
O1	417188	479691	917744	2403	5193	186218	904478	1.0558e+06	841540	193112	3042
O2	1483	119212	209118	297	388	1618	998126	592854	2.1592e+06	81987	20827
O3	11236	134007	41626	271	2170	812	51403.4	117638	185594	21206	3653.01
P	2599	26344	182407	8	327	72195	1046	180632	157680	23948	98.9999
Pmag01	0	0	0	0	0	23	0	7	0	0	0
Pmag02	96740	306377	170499	32	1829	53441	19093	27963	42169	2044	245
Prohormone-4a	46002	53573	128004	147	606	22399	66731	132908	133829	28071	2177
Q	18124	22376	44254	399	714	17366	14186	4418.35	6179.97	622	1372
Rimp01	142333	73255	108697	149	1355	24310	18582	8026	7378	839	792
Rimp02	0	0	73	0	0	0	0	0	180	5	19
Rimp03	0	3	0	0	0	0	0	0	0	0	0
Rimp05	0	247	678	2	0	14	0	0	11	0	210
SF-mi1	370	8918	16078	7	0	230	46644	52161	70442	5687	1345
SF-mi2	1.63042e+06	570432	1.00247e+06	5650	25703	437151	12396.5	6104	2038.49	457	315
S	0	45	0	0	0	0	40	0	12	4	190
T	965	658	945	232	126	464	14250	27714.1	16085	3463	1721
Tand01	713	6021	6043	0	0	303	55	258	708	32	243
Thyrostimulin-hormone-beta-5	0	0	11	0	0	0	0	0	0	0	0
Tpra06	805850	532026	2577	73	452	300535	289967	51030	33573.9	543	387
U	0	146	97	26	11	61	168	2620	1635	30	185
Virro01	24	0	12	0	59	0	0	0	0	0	0
Virro02	0	0	0	0	0	0	0	7977	15573	0	0
Virro03	0	0	0	24	0	0	0	0	0	10	0
V	0	0	46835	0	2	16400	8	197	172	3	172
Y	8349	8898	17368	35	119	2488	21312	5811	16485	486	1077

## Sheet: TPMs
Superfamily distribution of conotoxin precursors and hormones in the ebraeus judaeus specimens. Values below 10000 TPMs are highlighted in red.
	OK006	OK193	OK213	CebrOK014	CebrOK016	MAP17	OK005	OK212	OK214	CebrOK033	CebrOK035
A	26.4155	304.378	188.806	3645.53	917.147	124.567	5.39923	12.3503	95.5397	190.481	5246.73
A2	0	0	0	0	0	0	0	1.1581	9.54684	196.434	37.1763
B1	96.25	44327.6	25077.2	1032.81	101.287	1343.37	20452.3	15419	16645.4	12521.8	32812.3
B2	58520	83726.4	90908.8	35586.8	32917.7	109218	32354.5	30141.4	35940	17752.1	40696.9
C	4.26785	575.849	7001.47	0	15646.6	12.5215	1.85466	38.2321	14.8354	0	303.482
Cerm01	0	0	0.577005	0	271.865	0	11.1231	116.339	150.778	318.875	27887.1
Cerm02	0.982275	24.2916	678.621	0	180.68	37.9751	12982.8	4.44461	0	1574.52	38975.3
Cerm03	663.793	80822.4	22320.6	7730.18	1777.4	421.463	429680	454095	296566	526780	53107.9
Cerm04	1.94466	0	0	0	0	0	7.15808	0	0	0	0
Cerm06	3.60412	2.05405	13.7294	0	0	2.84183	0	1.9119	5.35828	12.2911	0
Cerm08	14272	1478.82	6.18579	170.43	0	0	6.07965	10013.7	8109.24	432.721	1930.74
Cerm10	262.7	19911	16412	9280.86	2522.91	675.994	6319.74	1201.56	1527.41	674.278	11606
Cerm11	12.9612	1.81251	106.933	0	0	0	6122.93	4078.87	3412.03	65.7908	2322.07
Cerm16	0	0	0	0	0	0	91.673	0	0	0	0
Con-ikot-ikot	91059.5	48515.3	64758	17336.1	26496.8	65886.5	3427.08	6801.13	4977.73	896.415	12162.4
Conkunitzin	17.8168	2584.39	283.915	3552.07	124.442	103.031	6355.03	12662.3	8843.62	3436	2772.03
Conopressin/Conophysin	40.7874	74.7535	89.318	0	82.7046	38.1494	1080.66	1151.8	2865.68	149.704	1815.99
Conorfamide	0	44.0109	67.6539	0	0	13.9708	0	0.664631	0.805216	0	664.663
Cver01	0	4.80756	0	0	0	3.60185	5.37213	9.09731	72.2599	24.3009	368.624
Cver02	6.38824	4802.84	539.623	0	0	21.2424	60.1964	0	140.252	0	6956.72
Cver03	0	0	0	0	0	5.22844	0	0.762949	0	0	0
Cver04	1.49257	0	0.761045	0	0	0	3189.3	1035.58	912.92	705.738	10786.2
Cver05	0	0	0	0	0	0	0.776778	0	0	0	0
Cver06	5.66763	72.7061	0.998018	364.939	0	16.6201	0	1242.09	948.796	0	605.236
Cver07	0	0	0	0	0	0	0	0	5.61612	0	0
D	6.33935	298.002	835.745	615.68	0	96.6398	1530.63	3664.8	1215.62	508.646	2537.37
Divergent-MKLCVVIVLL	0	0	0	0	0	7.96367	0	0	0	0	0
Divergent-MRFYIGLMAA	0	0	0	0	0	18.3889	0	0	0	0	0
E	12.2094	6.85513	11.3796	0	0	12.2307	6764.37	214.713	2636.44	737.348	18468.7
F	94681.3	62519.6	66911.1	31237.5	31345.9	72026.8	8305.24	1523.25	446.821	142.993	712.816
Ggeo01	32766	14519	8366.7	3633.95	8792.59	13205.1	10901	9160.03	9003.53	6669.47	23894
Ggeo03	9829.28	2971	2228.39	924.465	2221.59	791.423	8112.14	23330	22303.4	601.213	10424.1
H	24.6152	9292.83	4246.02	1148.83	292.008	196.602	2132.24	3.78398	562.26	75.5606	24839
I1	112.108	3551.88	7597.31	2508.16	2345.61	534.781	9747.18	1601.57	1963.46	1405.2	16716.1
I2	20797.2	9048.06	54819.6	14095	12278.3	29392.1	98233.9	145609	125885	79925.5	6504.28
I3	20365.8	18144.2	42365.9	80649.8	71524.2	64791.4	321.917	1300.59	727.019	502.787	4330.22
I4	2.54926	0	2.64227	0	71.301	4.16977	2484.48	1440.47	1088.65	1584.94	39404.1
Insulin-related-peptide	0	0	1.36	0	0	1.7578	0	0	0	1.7379	0
J	49.0647	0	23.1051	2246.59	285.933	443.536	16.7181	4544.46	13436.6	12764.2	1556.15
K	1.85571	10.3992	24.4129	0	0	17.7869	8.924	97.96	225.597	76.6235	124.539
L	131.06	0	97.7405	3582.71	326.889	174.984	0	4.44194	0	0	0
M	108798	231762	156611	229247	251924	183786	74406.2	117731	149244	110621	239322
N	0	46.2643	16.5473	0	68.6013	37.989	34.1371	7.86951	181.191	923.553	235.324
O1	71947	83065.6	172515	106311	54391.7	83884.5	103994	80009.5	71088.4	136986	31248.6
O2	268.833	19753.1	26982.3	12575.1	4382.29	695.328	109098	41755.3	181543	45643	196217
O3	1841.22	24261.5	6587.51	8602.49	17037.3	430.448	6207.06	8255.37	13696.8	12301.7	42621.9
P	330.284	3651.77	19779.3	278.353	2632.74	26104.8	87.3634	10045.6	9051.44	9225.38	744.673
Pmag01	0	0	0	0	0	9.24958	0	0.457	0	0	0
Pmag02	11999.4	36221.3	15658.4	846.206	11944.7	16288.2	1443.18	1419.89	2284.58	736.841	2814.24
Prohormone-4a	850.287	965.578	1243.59	440.704	394.394	802.323	485.002	755.244	735.074	783.873	1030.48
Q	2520.37	2975.2	4600.17	12605.9	5623.32	6043.9	1182.37	250.838	374.654	268.229	9167.1
Rimp01	8876.93	4218.97	4955.4	1759.34	3921.37	3621.1	701.052	198.726	194.798	129.857	1941.39
Rimp02	0	0	7.02246	0	0	0	0	0	10.1891	2.30584	117.747
Rimp03	0	1.17309	0	0	0	0	0	0	0	0	0
Rimp05	0	41.9521	89.0915	231.675	0	6.31717	0	0	1.05453	0	2795.62
SF-mi1	56.8769	1128.26	1676.18	246.183	0	78.6165	4344.87	3228.75	4684.6	2625.65	10331
SF-mi2	407017	138530	164045	386576	431551	273564	1368.22	447.87	175.092	284.683	3393.46
S	0	4.96674	0	0	0	0	3.41087	0	0.732364	1.67592	1298.21
T	230.24	154.954	185.377	16578.2	2393.01	323.623	2350.65	3159.49	2267.53	4431.39	39875.8
Tand01	40.4907	313.793	250.569	0	0	40.9702	1.85918	5.92313	17.2002	4.43375	543.845
Thyrostimulin-hormone-beta-5	0	0	0.643775	0	0	0	0	0	0	0	0
Tpra06	39964.9	43695	104.429	707.525	1121.19	36113.8	21146.1	965.395	741.473	60.091	727.704
U	0	29.8471	13.7164	1342.25	168.025	29.1083	21.1105	193.273	119.791	33.8572	2041.07
Virro01	3.26108	0	1.21132	0	432.392	0	0	0	0	0	0
Virro02	0	0	0	0	0	0	0	584.463	1228.01	0	0
Virro03	0	0	0	652.564	0	0	0	0	0	3.60305	0
V	0	0	6349.07	0	165.183	7399.09	1.01989	13.4194	13.9924	7.30738	1646.54
Y	1478.84	1511.29	2282.21	1487.67	1245.67	1089.32	2404.26	438.739	1339.39	292.878	10589.3

## Sheet: Expression
Differentially expressed superfamilies between V.ebraeus and V.judaeu (Only new samples). Values represents TPM normalized counts
Superfamily	OK006	OK193	OK213	OK005	OK212	OK214
Cerm03	663.793	80822.4	22320.6	429680	454095	296566
Con-ikot-ikot	91059.5	48515.3	64758	3427.08	6801.13	4977.73
Conkunitzin	17.8168	2584.39	283.915	6355.03	12662.3	8843.62
F	94681.3	62519.6	66911.1	8305.24	1523.25	446.821
Ggeo03	9829.28	2971	2228.39	8112.14	23330	22303.4
I2	20797.2	9048.06	54819.6	98233.9	145609	125885
I3	20365.8	18144.2	42365.9	321.917	1300.59	727.019
O2	268.833	19753.1	26982.3	109098	41755.3	181543
Pmag02	11999.4	36221.3	15658.4	1443.18	1419.89	2284.58
Q	2520.37	2975.2	4600.17	1182.37	250.838	374.654
Rimp01	8876.93	4218.97	4955.4	701.052	198.726	194.798
SF-mi2	407017	138530	164045	1368.22	447.87	175.092
T	230.24	154.954	185.377	2350.65	3159.49	2267.53
Differentially expressed superfamilies between V.ebraeus and V.judaeus.Values represents TPM normalized counts
	OK006	OK193	OK213	CebrOK014	CebrOK016	MAP17	OK005	OK212	OK214	CebrOK033	CebrOK035
Cerm03	663.793	80822.4	22320.6	7730.18	1777.4	421.463	429680	454095	296566	526780	53107.9
Cerm10	262.7	19911	16412	9280.86	2522.91	675.994	6319.74	1201.56	1527.41	674.278	11606
Con-ikot-ikot	91059.5	48515.3	64758	17336.1	26496.8	65886.5	3427.08	6801.13	4977.73	896.415	12162.4
Conkunitzin	17.8168	2584.39	283.915	3552.07	124.442	103.031	6355.03	12662.3	8843.62	3436	2772.03
F	94681.3	62519.6	66911.1	31237.5	31345.9	72026.8	8305.24	1523.25	446.821	142.993	712.816
Ggeo03	9829.28	2971	2228.39	924.465	2221.59	791.423	8112.14	23330	22303.4	601.213	10424.1
H	24.6152	9292.83	4246.02	1148.83	292.008	196.602	2132.24	3.78398	562.26	75.5606	24839
I2	20797.2	9048.06	54819.6	14095	12278.3	29392.1	98233.9	145609	125885	79925.5	6504.28
I3	20365.8	18144.2	42365.9	80649.8	71524.2	64791.4	321.917	1300.59	727.019	502.787	4330.22
O2	268.833	19753.1	26982.3	12575.1	4382.29	695.328	109098	41755.3	181543	45643	196217
Pmag02	11999.4	36221.3	15658.4	846.206	11944.7	16288.2	1443.18	1419.89	2284.58	736.841	2814.24
Q	2520.37	2975.2	4600.17	12605.9	5623.32	6043.9	1182.37	250.838	374.654	268.229	9167.1
Rimp01	8876.93	4218.97	4955.4	1759.34	3921.37	3621.1	701.052	198.726	194.798	129.857	1941.39
SF-mi2	407017	138530	164045	386576	431551	273564	1368.22	447.87	175.092	284.683	3393.46
T	230.24	154.954	185.377	16578.2	2393.01	323.623	2350.65	3159.49	2267.53	4431.39	39875.8
Tpra06	39964.9	43695	104.429	707.525	1121.19	36113.8	21146.1	965.395	741.473	60.091	727.704
